# Supplementary material
Source: PubMed Central journal article supplement (PMC3272149)
Supplement: NIHMS342498-supplement-1_si_001.pdf [file NIHMS342498-supplement-1_si_001.pdf]

# Mascot Search Results

User : PRL\_NUCLEI  
 Email :  
 Search title : Submitted from linz a flav 2Da by Mascot Daemon on D55NS391  
 MS data file : C:\Xcalibur\sequest\Linz\v2009121702.mgf  
 Database : Aspergillus flavus-AY371490\_parasiticus (14799 sequences; 6103753 residues)  
 Timestamp : 18 Dec 2009 at 14:30:48 GMT  
 Enzyme : Trypsin  
 Fixed modifications : Carbamidomethyl (C)  
 Variable modifications : Oxidation (M)  
 Mass values : Monoisotopic  
 Protein Mass : Unrestricted  
 Peptide Mass Tolerance :  $\pm 2$  Da (#  $^{13}\text{C} = 1$ )  
 Fragment Mass Tolerance:  $\pm 0.6$  Da  
 Max Missed Cleavages : 2  
 Instrument type : ESI-TRAP  
 Number of queries : 16412  
 Protein hits :

[gi|220689386|gb|EED45737.1|](#)  
[gi|220700135|gb|EED56474.1|](#)  
[gi|220699546|gb|EED55885.1|](#)  
[gi|220700832|gb|EED57170.1|](#)  
[gi|220694557|gb|EED50901.1|](#)  
[gi|220698646|gb|EED54986.1|](#)  
[gi|220696438|gb|EED52780.1|](#)  
[gi|220692818|gb|EED49164.1|](#)  
[gi|220699320|gb|EED55659.1|](#)  
[gi|220697529|gb|EED53870.1|](#)  
[gi|220690467|gb|EED46816.1|](#)  
[gi|220693770|gb|EED50115.1|](#)  
[gi|220698278|gb|EED54618.1|](#)  
[gi|220696531|gb|EED52873.1|](#)  
[gi|220694869|gb|EED51212.1|](#)  
[gi|220699482|gb|EED55821.1|](#)  
[gi|220700638|gb|EED56976.1|](#)  
[gi|220698199|gb|EED54539.1|](#)  
[gi|220701504|gb|EED57842.1|](#)  
[gi|220692651|gb|EED48997.1|](#)  
[gi|220701397|gb|EED57735.1|](#)  
[gi|220699514|gb|EED55853.1|](#)  
[gi|220700072|gb|EED56411.1|](#)  
[gi|220689888|gb|EED46238.1|](#)  
[gi|220691704|gb|EED48052.1|](#)

ATP synthase F1, beta subunit, putative [Aspergillus flavus NRRL3357]  
 enolase/allergen Asp F 22 [Aspergillus flavus NRRL3357]  
 pyruvate decarboxylase PdcA, putative [Aspergillus flavus NRRL3357]  
 mitochondrial F1 ATPase subunit alpha, putative [Aspergillus flavus NRRL3357]  
 translation elongation factor EF-2 subunit, putative [Aspergillus flavus NRRL3357]  
 molecular chaperone Hsp70 [Aspergillus flavus NRRL3357]  
 glucose-6-phosphate isomerase [Aspergillus flavus NRRL3357]  
 14-3-3 family protein ArtA, putative [Aspergillus flavus NRRL3357]  
 alcohol dehydrogenase, zinc-containing, putative [Aspergillus flavus NRRL3357]  
 cobalamin-independent methionine synthase MetH/D [Aspergillus flavus NRRL3357]  
 alcohol dehydrogenase, putative [Aspergillus flavus NRRL3357]  
 phosphoglycerate kinase PgkA, putative [Aspergillus flavus NRRL3357]  
 60S ribosomal protein L5, putative [Aspergillus flavus NRRL3357]  
 antigenic mitochondrial protein HSP60, putative [Aspergillus flavus NRRL3357]  
 malate dehydrogenase, NAD-dependent [Aspergillus flavus NRRL3357]  
 fructose-bisphosphate aldolase, class II [Aspergillus flavus NRRL3357]  
 malate dehydrogenase, NAD-dependent [Aspergillus flavus NRRL3357]  
 transketolase TktA [Aspergillus flavus NRRL3357]  
 phosphoglycerate mutase, 2,3-bisphosphoglycerate-independent [Aspergillus flavus NRRL3357]  
 translation elongation factor EF-1 alpha subunit, putative [Aspergillus flavus NRRL3357]  
 mitochondrial phosphate carrier protein (Mir1), putative [Aspergillus flavus NRRL3357]  
 aspartic endopeptidase Pep2 [Aspergillus flavus NRRL3357]  
 6-phosphogluconate dehydrogenase Gnd1, putative [Aspergillus flavus NRRL3357]  
 transaldolase [Aspergillus flavus NRRL3357]  
 molecular chaperone and allergen Mod-E/Hsp90/Hsp1 [Aspergillus flavus NRRL3357]

[gi|220693792|gb|EED50137.1|](#)  
[gi|220690667|gb|EED47016.1|](#)  
[gi|220699036|gb|EED55375.1|](#)  
[gi|220689985|gb|EED46335.1|](#)  
[gi|220691583|gb|EED47931.1|](#)  
[gi|220698900|gb|EED55239.1|](#)  
[gi|220692490|gb|EED48836.1|](#)  
[gi|220696409|gb|EED52751.1|](#)  
[gi|220697342|gb|EED53683.1|](#)  
[gi|220698109|gb|EED54449.1|](#)  
[gi|220691708|gb|EED48056.1|](#)  
[gi|220690088|gb|EED46438.1|](#)  
[gi|220696127|gb|EED52469.1|](#)  
[gi|220697497|gb|EED53838.1|](#)  
[gi|220697614|gb|EED53955.1|](#)  
[gi|220691727|gb|EED48075.1|](#)  
[gi|220693675|gb|EED50020.1|](#)  
[gi|220697586|gb|EED53927.1|](#)  
[gi|220699460|gb|EED55799.1|](#)  
[gi|220696267|gb|EED52609.1|](#)  
[gi|220694939|gb|EED51282.1|](#)  
[gi|220693036|gb|EED49382.1|](#)  
[gi|220690395|gb|EED46744.1|](#)  
[gi|220701339|gb|EED57677.1|](#)  
[gi|220701642|gb|EED57980.1|](#)  
[gi|220699787|gb|EED56126.1|](#)  
[gi|220696418|gb|EED52760.1|](#)  
[gi|220701635|gb|EED57973.1|](#)  
[gi|220697495|gb|EED53836.1|](#)  
[gi|220698204|gb|EED54544.1|](#)  
[gi|220696972|gb|EED53313.1|](#)  
[gi|220689909|gb|EED46259.1|](#)  
[gi|220699794|gb|EED56133.1|](#)  
[gi|220696919|gb|EED53260.1|](#)  
[gi|220699585|gb|EED55924.1|](#)  
[gi|220697966|gb|EED54306.1|](#)  
[gi|220700969|gb|EED57307.1|](#)  
[gi|220701426|gb|EED57764.1|](#)  
[gi|220690795|gb|EED47144.1|](#)  
[gi|220691640|gb|EED47988.1|](#)  
[gi|220701800|gb|EED58138.1|](#)  
[gi|212283871|gb|ACJ23337.1|](#)  
[gi|220694447|gb|EED50791.1|](#)

adenosylhomocysteinase [Aspergillus flavus NRRL3357]  
 mitochondrial ADP,ATP carrier protein (Ant), putative [Aspergillus  
 aspartate aminotransferase, putative [Aspergillus flavus NRRL3357]  
 succinate dehydrogenase subunit Sdh1, putative [Aspergillus flavus  
 60S ribosomal protein L4, putative [Aspergillus flavus NRRL3357]  
 glyceraldehyde 3-phosphate dehydrogenase GpdA [Aspergillus flavus ]  
 fatty acid synthase beta subunit, putative [Aspergillus flavus NRR  
 40S ribosomal protein S15, putative [Aspergillus flavus NRRL3357]  
 aminopeptidase [Aspergillus flavus NRRL3357]  
 mitochondrial processing peptidase beta subunit, putative [Aspergi  
 ubiquinol-cytochrome C reductase complex core protein 2, putative  
 40S ribosomal protein S4, putative [Aspergillus flavus NRRL3357]  
 60S ribosomal protein L7 [Aspergillus flavus NRRL3357]  
 phosphoribosylaminoimidazolecarboxamide formyltransferase/IMP [Asp  
 Glutamate/Leucine/Phenylalanine/Valine dehydrogenase, putative [As  
 NADH-ubiquinone oxidoreductase, subunit G, putative [Aspergillus f  
 60S ribosomal protein L6 [Aspergillus flavus NRRL3357]  
 outer mitochondrial membrane protein porin [Aspergillus flavus NRR  
 phosphoglucomutase PgmA [Aspergillus flavus NRRL3357]  
 dihydrolipoamide dehydrogenase [Aspergillus flavus NRRL3357]  
 translation elongation factor eEF-1 subunit gamma, putative [Asper  
 triosephosphate isomerase [Aspergillus flavus NRRL3357]  
 40S ribosomal protein S3Ae [Aspergillus flavus NRRL3357]  
 40S ribosomal protein S22 [Aspergillus flavus NRRL3357]  
 aspartyl aminopeptidase [Aspergillus flavus NRRL3357]  
 cytosolic large ribosomal subunit protein L7A [Aspergillus flavus ]  
 mitochondrial Hsp70 chaperone (Ssc70), putative [Aspergillus flavu  
 inorganic diphosphatase, putative [Aspergillus flavus NRRL3357]  
 clathrin heavy chain [Aspergillus flavus NRRL3357]  
 prohibitin complex subunit Phb1, putative [Aspergillus flavus NRRL  
 aldehyde reductase (AKR1), putative [Aspergillus flavus NRRL3357]  
 conserved hypothetical protein [Aspergillus flavus NRRL3357]  
 mitochondrial aconitate hydratase, putative [Aspergillus flavus NRI  
 ATP citrate lyase subunit (Acl), putatibe [Aspergillus flavus NRRL  
 40S ribosomal protein S7e [Aspergillus flavus NRRL3357]  
 sorbitol/xylulose reductase Soul-like, putative [Aspergillus flavu  
 ATP synthase gamma chain, mitochondrial precursor, putative [Asper  
 40S ribosomal protein S5, putative [Aspergillus flavus NRRL3357]  
 G-protein complex beta subunit CpcB [Aspergillus flavus NRRL3357]  
 nucleoside diphosphate kinase [Aspergillus flavus NRRL3357]  
 60S ribosomal protein L9, putative [Aspergillus flavus NRRL3357]  
 glyceraldehyde-3-phosphate dehydrogenase [Aspergillus flavus]  
 ATP synthase oligomycin sensitivity conferral protein, putative [A

[gi|220692495|gb|EED48841.1|](#)  
[gi|220694367|gb|EED50711.1|](#)  
[gi|220689219|gb|EED45570.1|](#)  
[gi|220690388|gb|EED46738.1|](#)  
[gi|220695061|gb|EED51404.1|](#)  
[gi|220694917|gb|EED51260.1|](#)  
[gi|220694374|gb|EED50718.1|](#)  
[gi|220701626|gb|EED57964.1|](#)  
[gi|220700635|gb|EED56973.1|](#)  
[gi|220689385|gb|EED45736.1|](#)  
[gi|220688985|gb|EED45337.1|](#)  
[gi|220699162|gb|EED55501.1|](#)  
[gi|220699951|gb|EED56290.1|](#)  
[gi|220691710|gb|EED48058.1|](#)  
[gi|220688664|gb|EED45016.1|](#)  
[gi|220692772|gb|EED49118.1|](#)  
[gi|45477378|gb|AY371490.1|\\_e](#)  
[gi|45477378|gb|AY371490.1|\\_b](#)  
[gi|220690378|gb|EED46728.1|](#)  
[gi|220690692|gb|EED47041.1|](#)  
[gi|220700805|gb|EED57143.1|](#)  
[gi|220701506|gb|EED57844.1|](#)  
[gi|220697596|gb|EED53937.1|](#)  
[gi|220699315|gb|EED55654.1|](#)  
[gi|220699334|gb|EED55673.1|](#)  
[gi|220692437|gb|EED48784.1|](#)  
[gi|220699731|gb|EED56070.1|](#)  
[gi|220693932|gb|EED50277.1|](#)  
[gi|220692491|gb|EED48837.1|](#)  
[gi|220699092|gb|EED55431.1|](#)  
[gi|220692461|gb|EED48808.1|](#)  
[gi|220693825|gb|EED50170.1|](#)  
[gi|220698459|gb|EED54799.1|](#)  
[gi|220698200|gb|EED54540.1|](#)  
[gi|220700955|gb|EED57293.1|](#)  
[gi|220698263|gb|EED54603.1|](#)  
[gi|220693543|gb|EED49888.1|](#)  
[gi|220688653|gb|EED45005.1|](#)  
[gi|220701216|gb|EED57554.1|](#)  
[gi|220695209|gb|EED51552.1|](#)  
[gi|220694293|gb|EED50637.1|](#)  
[gi|220695019|gb|EED51362.1|](#)  
[gi|220693633|gb|EED49978.1|](#)

pyruvate dehydrogenase E1 beta subunit PdbA, putative [Aspergillus  
 60S ribosomal protein L3 [Aspergillus flavus NRRL3357]  
 ribosomal protein S5 [Aspergillus flavus NRRL3357]  
 histone H2B [Aspergillus flavus NRRL3357]  
 4-aminobutyrate transaminase GatA [Aspergillus flavus NRRL3357]  
 actin Act1 [Aspergillus flavus NRRL3357]  
 adenylosuccinate lyase Ade13, putative [Aspergillus flavus NRRL3357]  
 glucose-6-phosphate 1-dehydrogenase [Aspergillus flavus NRRL3357]  
 pyruvate dehydrogenase complex, dihydrolipoamide acetyltransferase  
 cytochrome c oxidase subunit V [Aspergillus flavus NRRL3357]  
 Hsp70 chaperone (HscA), putative [Aspergillus flavus NRRL3357]  
 glycerol dehydrogenase (GldB), putative [Aspergillus flavus NRRL3357]  
 Hsp70 chaperone BiP/Kar2, putative [Aspergillus flavus NRRL3357]  
 citrate synthase (Cit1), putative [Aspergillus flavus NRRL3357]  
 ribosomal protein S13p/S18e [Aspergillus flavus NRRL3357]  
 peptidyl-prolyl cis-trans isomerase [Aspergillus flavus NRRL3357]  
 Aspergillus parasiticus aflatoxin pathway gene cluster, complete s  
 Aspergillus parasiticus aflatoxin pathway gene cluster, complete s  
 glutamate carboxypeptidase, putative [Aspergillus flavus NRRL3357]  
 40S ribosomal protein S3, putative [Aspergillus flavus NRRL3357]  
 acetyl-coA hydrolase Ach1, putative [Aspergillus flavus NRRL3357]  
 serine hydroxymethyltransferase, putative [Aspergillus flavus NRRL3357]  
 ubiquinol-cytochrome c reductase complex 14 kDa protein [Aspergillus  
 60S ribosomal protein L15, putative [Aspergillus flavus NRRL3357]  
 Ribosomal L18ae protein family [Aspergillus flavus NRRL3357]  
 hexokinase Kxk, putative [Aspergillus flavus NRRL3357]  
 Mn superoxide dismutase MnSOD [Aspergillus flavus NRRL3357]  
 UTP-glucose-1-phosphate uridylyltransferase Ugp1, putative [Aspergillus  
 fatty acid synthase alpha subunit FasA [Aspergillus flavus NRRL3357]  
 NADH-ubiquinone oxidoreductase, subunit F, putative [Aspergillus flavus NRRL3357]  
 protein disulfide isomerase Pdi1, putative [Aspergillus flavus NRRL3357]  
 GTP-binding protein YchF [Aspergillus flavus NRRL3357]  
 40S ribosomal protein S0 [Aspergillus flavus NRRL3357]  
 spermidine synthase [Aspergillus flavus NRRL3357]  
 60S ribosomal protein L22, putative [Aspergillus flavus NRRL3357]  
 glycogen phosphorylase GlpV/Gph1, putative [Aspergillus flavus NRRL3357]  
 mitochondrial hypoxia responsive domain protein [Aspergillus flavus NRRL3357]  
 glutamate decarboxylase [Aspergillus flavus NRRL3357]  
 TCTP family protein [Aspergillus flavus NRRL3357]  
 myo-inositol-phosphate synthase, putative [Aspergillus flavus NRRL3357]  
 secretory pathway gdp dissociation inhibitor [Aspergillus flavus NRRL3357]  
 ribosomal protein L14 [Aspergillus flavus NRRL3357]  
 60S ribosomal protein L1 [Aspergillus flavus NRRL3357]

[gi|220700819|gb|EED57157.1|](#)  
[gi|220701753|gb|EED58091.1|](#)  
[gi|220690678|gb|EED47027.1|](#)  
[gi|220692700|gb|EED49046.1|](#)  
[gi|220696367|gb|EED52709.1|](#)  
[gi|45477393|gb|AAS66016.1|](#)  
[gi|6177971|dbj|BAA86103.1|](#)  
[gi|220695964|gb|EED52306.1|](#)  
[gi|220695968|gb|EED52310.1|](#)  
[gi|220700137|gb|EED56476.1|](#)  
[gi|220690102|gb|EED46452.1|](#)  
[gi|220691722|gb|EED48070.1|](#)  
[gi|220701627|gb|EED57965.1|](#)  
[gi|220700627|gb|EED56965.1|](#)  
[gi|220690663|gb|EED47012.1|](#)  
[gi|220690399|gb|EED46748.1|](#)  
[gi|220690053|gb|EED46403.1|](#)  
[gi|220692783|gb|EED49129.1|](#)  
[gi|220695604|gb|EED51947.1|](#)  
[gi|220690412|gb|EED46761.1|](#)  
[gi|220700002|gb|EED56341.1|](#)  
[gi|414296|gb|AAA32699.1|](#)  
[gi|220695029|gb|EED51372.1|](#)  
[gi|220699808|gb|EED56147.1|](#)  
[gi|1293655|gb|AAC49318.1|](#)  
[gi|220701430|gb|EED57768.1|](#)  
[gi|220695168|gb|EED51511.1|](#)  
[gi|220688456|gb|EED44809.1|](#)  
[gi|220693734|gb|EED50079.1|](#)  
[gi|220688462|gb|EED44815.1|](#)  
[gi|220697094|gb|EED53435.1|](#)  
[gi|220701357|gb|EED57695.1|](#)  
[gi|220689982|gb|EED46332.1|](#)  
[gi|220689851|gb|EED46201.1|](#)  
[gi|220699072|gb|EED55411.1|](#)  
[gi|220700172|gb|EED56511.1|](#)  
[gi|220696535|gb|EED52877.1|](#)  
[gi|220693968|gb|EED50313.1|](#)  
[gi|220696166|gb|EED52508.1|](#)  
[gi|220690751|gb|EED47100.1|](#)  
[gi|220697491|gb|EED53832.1|](#)  
[gi|220698179|gb|EED54519.1|](#)  
[gi|220698604|gb|EED54944.1|](#)

mitochondrial ATPase subunit ATP4, putative [Aspergillus flavus NRRL3357]  
pyruvate kinase [Aspergillus flavus NRRL3357]  
40S ribosomal protein S12 [Aspergillus flavus NRRL3357]  
fumarate hydratase, putative [Aspergillus flavus NRRL3357]  
40S ribosomal protein Rps16, putative [Aspergillus flavus NRRL3357]  
methyltransferase B [Aspergillus parasiticus]  
O-methyltransferase [Aspergillus parasiticus]  
hydantoin utilization protein A, putative [Aspergillus flavus NRRL3357]  
flavoheмоprotein [Aspergillus flavus NRRL3357]  
14-3-3 protein sigma, gamma, zeta, beta/alpha, putative [Aspergillus flavus NRRL3357]  
40S ribosomal protein S9 [Aspergillus flavus NRRL3357]  
aminopeptidase, putative [Aspergillus flavus NRRL3357]  
60S ribosomal protein L35Ae [Aspergillus flavus NRRL3357]  
translation elongation factor eEF-3, putative [Aspergillus flavus NRRL3357]  
40S ribosomal protein S19 [Aspergillus flavus NRRL3357]  
seryl-tRNA synthetase [Aspergillus flavus NRRL3357]  
ATP sulphurylase [Aspergillus flavus NRRL3357]  
IMP dehydrogenase, putative [Aspergillus flavus NRRL3357]  
HAD superfamily hydrolase, putative [Aspergillus flavus NRRL3357]  
60S ribosomal protein L23 [Aspergillus flavus NRRL3357]  
14-alpha sterol demethylase Cyp51A [Aspergillus flavus NRRL3357]  
O-methyltransferase [Aspergillus flavus NRRL3357]  
2-methylcitrate dehydratase, putative [Aspergillus flavus NRRL3357]  
NADH-ubiquinone oxidoreductase 39 kDa subunit, putative [Aspergillus flavus NRRL3357]  
versicolorin B synthase [Aspergillus parasiticus]  
2-isopropylmalate synthase [Aspergillus flavus NRRL3357]  
aldehyde dehydrogenase, putative [Aspergillus flavus NRRL3357]  
60S ribosomal protein L13 [Aspergillus flavus NRRL3357]  
S-adenosylmethionine synthetase [Aspergillus flavus NRRL3357]  
succinyl-CoA synthetase beta subunit, putative [Aspergillus flavus NRRL3357]  
argininosuccinate synthase [Aspergillus flavus NRRL3357]  
adenylosuccinate synthetase AdB [Aspergillus flavus NRRL3357]  
argininosuccinate lyase [Aspergillus flavus NRRL3357]  
isoflavone reductase family protein [Aspergillus flavus NRRL3357]  
40S ribosomal protein S6 [Aspergillus flavus NRRL3357]  
proteasome component Prs3, putative [Aspergillus flavus NRRL3357]  
60S ribosomal protein L30, putative [Aspergillus flavus NRRL3357]  
UDP-N-acetylglucosamine pyrophosphorylase [Aspergillus flavus NRRL3357]  
small nuclear ribonucleoprotein (LSM7), putative [Aspergillus flavus NRRL3357]  
calnexin [Aspergillus flavus NRRL3357]  
60S ribosomal protein L11 [Aspergillus flavus NRRL3357]  
isoleucyl-tRNA synthetase, cytoplasmic [Aspergillus flavus NRRL3357]  
pyruvate dehydrogenase E1 component alpha subunit, putative [Aspergillus flavus NRRL3357]



|                                             |                                                                                               |
|---------------------------------------------|-----------------------------------------------------------------------------------------------|
| <a href="#">gi 220689889 gb EED46239.1 </a> | autophagic serine protease Alp2 [Aspergillus flavus NRRL3357]                                 |
| <a href="#">gi 220695424 gb EED51767.1 </a> | Ketol-acid reductoisomerase [Aspergillus flavus NRRL3357]                                     |
| <a href="#">gi 220693676 gb EED50021.1 </a> | adhesion regulating molecule, putative [Aspergillus flavus NRRL3357]                          |
| <a href="#">gi 220699147 gb EED55486.1 </a> | iron superoxide dismutase A, putative [Aspergillus flavus NRRL3357]                           |
| <a href="#">gi 220698234 gb EED54574.1 </a> | DUF543 domain protein [Aspergillus flavus NRRL3357]                                           |
| <a href="#">gi 220698203 gb EED54543.1 </a> | ubiquinol-cytochrome C reductase complex subunit UcrQ, putative [Aspergillus flavus NRRL3357] |
| <a href="#">gi 220690400 gb EED46749.1 </a> | D-3-phosphoglycerate dehydrogenase [Aspergillus flavus NRRL3357]                              |
| <a href="#">gi 220697509 gb EED53850.1 </a> | translation initiation factor EF-2 gamma subunit, putative [Aspergillus flavus NRRL3357]      |
| <a href="#">gi 220692416 gb EED48763.1 </a> | conserved hypothetical protein [Aspergillus flavus NRRL3357]                                  |
| <a href="#">gi 220694880 gb EED51223.1 </a> | mitochondrial import receptor subunit (tom40), putative [Aspergillus flavus NRRL3357]         |
| <a href="#">gi 220701104 gb EED57442.1 </a> | cytochrome C1/Cyt1, putative [Aspergillus flavus NRRL3357]                                    |
| <a href="#">gi 220692849 gb EED49195.1 </a> | hydroxymethylbilane synthase, putative [Aspergillus flavus NRRL3357]                          |
| <a href="#">gi 220689951 gb EED46301.1 </a> | woronin body major protein precursor, putative [Aspergillus flavus NRRL3357]                  |
| <a href="#">gi 220696373 gb EED52715.1 </a> | 40S ribosomal protein S11 [Aspergillus flavus NRRL3357]                                       |
| <a href="#">gi 220691267 gb EED47615.1 </a> | 60S ribosomal protein L37a [Aspergillus flavus NRRL3357]                                      |
| <a href="#">gi 220690482 gb EED46831.1 </a> | adenosine kinase, putative [Aspergillus flavus NRRL3357]                                      |
| <a href="#">gi 220700314 gb EED56652.1 </a> | cyclopropane-fatty-acyl-phospholipid synthase, putative [Aspergillus flavus NRRL3357]         |
| <a href="#">gi 220689529 gb EED45880.1 </a> | conserved hypothetical protein [Aspergillus flavus NRRL3357]                                  |
| <a href="#">gi 220695409 gb EED51752.1 </a> | ribosomal protein L26 [Aspergillus flavus NRRL3357]                                           |
| <a href="#">gi 46370542 gb AAS90074.1 </a>  | NorA [Aspergillus flavus]                                                                     |
| <a href="#">gi 220699220 gb EED55559.1 </a> | conserved hypothetical protein [Aspergillus flavus NRRL3357]                                  |
| <a href="#">gi 220696700 gb EED53042.1 </a> | 60S ribosomal protein L18 [Aspergillus flavus NRRL3357]                                       |
| <a href="#">gi 46370464 gb AAS89999.1 </a>  | PksA [Aspergillus flavus]                                                                     |
| <a href="#">gi 1081987 gb AAC41674.1 </a>   | polyketide synthase                                                                           |
| <a href="#">gi 46370488 gb AAS90022.1 </a>  | PksA [Aspergillus flavus]                                                                     |
| <a href="#">gi 40054456 gb AAR32704.2 </a>  | PksA [Aspergillus sp. L]                                                                      |
| <a href="#">gi 220696379 gb EED52721.1 </a> | eukaryotic translation initiation factor 3 subunit EifC1, putative                            |
| <a href="#">gi 220692565 gb EED48911.1 </a> | actin Act1 [Aspergillus flavus NRRL3357]                                                      |
| <a href="#">gi 220692810 gb EED49156.1 </a> | alkaline serine protease [Aspergillus flavus NRRL3357]                                        |
| <a href="#">gi 220693799 gb EED50144.1 </a> | TIM-barrel enzyme family protein [Aspergillus flavus NRRL3357]                                |
| <a href="#">gi 220690459 gb EED46808.1 </a> | succinyl-CoA synthetase alpha subunit, putative [Aspergillus flavus NRRL3357]                 |
| <a href="#">gi 220694688 gb EED51032.1 </a> | arginyl-tRNA synthetase [Aspergillus flavus NRRL3357]                                         |
| <a href="#">gi 220696155 gb EED52497.1 </a> | 60S ribosomal protein L17 [Aspergillus flavus NRRL3357]                                       |
| <a href="#">gi 220688980 gb EED45332.1 </a> | acetyl-CoA acetyltransferase, putative [Aspergillus flavus NRRL3357]                          |
| <a href="#">gi 220691506 gb EED47854.1 </a> | cytochrome c oxidase subunit Va, putative [Aspergillus flavus NRRL3357]                       |
| <a href="#">gi 220691647 gb EED47995.1 </a> | glutamyl-tRNA synthetase [Aspergillus flavus NRRL3357]                                        |
| <a href="#">gi 220690361 gb EED46711.1 </a> | 60S ribosomal protein L27a, putative [Aspergillus flavus NRRL3357]                            |
| <a href="#">gi 220692165 gb EED48512.1 </a> | N-acetylglucosamine-phosphate mutase [Aspergillus flavus NRRL3357]                            |
| <a href="#">gi 220689407 gb EED45758.1 </a> | iron-sulfur protein subunit of succinate dehydrogenase Sdh2, putative                         |
| <a href="#">gi 220690101 gb EED46451.1 </a> | 60S ribosomal protein L21, putative [Aspergillus flavus NRRL3357]                             |
| <a href="#">gi 220701844 gb EED58182.1 </a> | glycerol-3-phosphate dehydrogenase, mitochondrial [Aspergillus flavus NRRL3357]               |
| <a href="#">gi 220699161 gb EED55500.1 </a> | phosphatidyl synthase [Aspergillus flavus NRRL3357]                                           |
| <a href="#">gi 220695611 gb EED51954.1 </a> | AI-BP family protein [Aspergillus flavus NRRL3357]                                            |

[gi|220700980|gb|EED57318.1|](#)  
[gi|220699918|gb|EED56257.1|](#)  
[gi|220696689|gb|EED53031.1|](#)  
[gi|220694934|gb|EED51277.1|](#)  
[gi|220692152|gb|EED48499.1|](#)  
[gi|220701644|gb|EED57982.1|](#)  
[gi|220701605|gb|EED57943.1|](#)  
[gi|220697901|gb|EED54241.1|](#)  
[gi|220695108|gb|EED51451.1|](#)  
[gi|220691359|gb|EED47707.1|](#)  
[gi|220700651|gb|EED56989.1|](#)  
[gi|220696408|gb|EED52750.1|](#)  
[gi|220690318|gb|EED46668.1|](#)  
[gi|220692679|gb|EED49025.1|](#)  
[gi|220701354|gb|EED57692.1|](#)  
[gi|220700053|gb|EED56392.1|](#)  
[gi|220690447|gb|EED46796.1|](#)  
[gi|46370508|gb|AAS90042.1|](#)  
[gi|46370556|gb|AAS90088.1|](#)  
[gi|220701100|gb|EED57438.1|](#)  
[gi|46370639|gb|AAS90106.1|](#)  
[gi|220690598|gb|EED46947.1|](#)  
[gi|220698656|gb|EED54996.1|](#)  
[gi|220690852|gb|EED47201.1|](#)  
[gi|220700991|gb|EED57329.1|](#)  
[gi|220697392|gb|EED53733.1|](#)  
[gi|220690860|gb|EED47209.1|](#)  
[gi|220697217|gb|EED53558.1|](#)  
[gi|220691248|gb|EED47596.1|](#)  
[gi|45477378|gb|AY371490.1|\\_f](#)  
[gi|220699528|gb|EED55867.1|](#)  
[gi|220699027|gb|EED55366.1|](#)  
[gi|220691376|gb|EED47724.1|](#)  
[gi|220698520|gb|EED54860.1|](#)  
[gi|220698443|gb|EED54783.1|](#)  
[gi|220691503|gb|EED47851.1|](#)  
[gi|220701006|gb|EED57344.1|](#)  
[gi|220690479|gb|EED46828.1|](#)  
[gi|220694246|gb|EED50590.1|](#)  
[gi|220696195|gb|EED52537.1|](#)  
[gi|220699259|gb|EED55598.1|](#)  
[gi|220694536|gb|EED50880.1|](#)  
[gi|220698647|gb|EED54987.1|](#)

protein transport protein Sec23, putative [Aspergillus flavus NRRL  
 pyruvate dehydrogenase, putative [Aspergillus flavus NRRL3357]  
 leukotriene A4 hydrolase [Aspergillus flavus NRRL3357]  
 NADH-ubiquinone oxidoreductase B14 subunit, putative [Aspergillus :  
 60S ribosomal protein L27e [Aspergillus flavus NRRL3357]  
 epoxide hydrolase, putative [Aspergillus flavus NRRL3357]  
 C1 tetrahydrofolate synthase, putative [Aspergillus flavus NRRL335  
 cofactor for methionyl- and glutamyl-tRNA synthetase, putative [As  
 nucleoside-diphosphate-sugar epimerase, putative [Aspergillus flav  
 60S ribosomal protein L32 [Aspergillus flavus NRRL3357]  
 proteasome component Pre8, putative [Aspergillus flavus NRRL3357]  
 60S acidic ribosomal protein P2/allergen Asp F 8 [Aspergillus flav  
 glutaryl-CoA dehydrogenase, putative [Aspergillus flavus NRRL3357]  
 allergen Asp F3 [Aspergillus flavus NRRL3357]  
 oxidoreductase, zinc-binding dehydrogenase family, putative [Asper  
 PH domain protein [Aspergillus flavus NRRL3357]  
 translation initiation factor eIF-6, putative [Aspergillus flavus ]  
 VBS [Aspergillus flavus]  
 VBS [Aspergillus flavus]  
 glycogen debranching enzyme Gdb1, putative [Aspergillus flavus NRR  
 VBS [Aspergillus flavus]  
 ribosomal protein L16a [Aspergillus flavus NRRL3357]  
 26S proteasome regulatory particle subunit Rpn8, putative [Aspergi  
 threonyl-tRNA synthetase, putative [Aspergillus flavus NRRL3357]  
 ATP synthase delta chain, mitochondrial precursor, putative [Asper  
 mitochondrial peroxiredoxin Prx1, putative [Aspergillus flavus NRR  
 NADH-ubiquinone oxidoreductase 213 kDa subunit [Aspergillus flavus  
 NADPH cytochrome P450 reductase (CprA), putative [Aspergillus flav  
 cell division control protein Cdc48 [Aspergillus flavus NRRL3357]  
 Aspergillus parasiticus aflatoxin pathway gene cluster, complete s  
 ubiquitin (UbiC), putative [Aspergillus flavus NRRL3357]  
 polyubiquitin UbiD/Ubi4, putative [Aspergillus flavus NRRL3357]  
 uracil phosphoribosyltransferase [Aspergillus flavus NRRL3357]  
 stomatin family protein [Aspergillus flavus NRRL3357]  
 translation initiation factor 2 alpha subunit, putative [Aspergill  
 phosphoribosylformylglycinamide synthase [Aspergillus flavus NRR  
 6-phosphogluconolactonase, putative [Aspergillus flavus NRRL3357]  
 60S ribosomal protein L8, putative [Aspergillus flavus NRRL3357]  
 Coatomer subunit gamma, putative [Aspergillus flavus NRRL3357]  
 glyceraldehyde 3-phosphate dehydrogenase, putative [Aspergillus fl  
 ubiquitin UbiA, putative [Aspergillus flavus NRRL3357]  
 V-type ATPase, B subunit, putative [Aspergillus flavus NRRL3357]  
 mitochondrial GTP/GDP transporter Ggc1, putative [Aspergillus flav

[gi|220701041|gb|EED57379.1|](#)  
[gi|220699754|gb|EED56093.1|](#)  
[gi|45477378|gb|AY371490.1|\\_d](#)  
[gi|220698533|gb|EED54873.1|](#)  
[gi|220693029|gb|EED49375.1|](#)  
[gi|220693751|gb|EED50096.1|](#)  
[gi|220699141|gb|EED55480.1|](#)  
[gi|220701789|gb|EED58127.1|](#)  
[gi|220699805|gb|EED56144.1|](#)  
[gi|220696548|gb|EED52890.1|](#)  
[gi|220689446|gb|EED45797.1|](#)  
[gi|220696653|gb|EED52995.1|](#)  
[gi|220693956|gb|EED50301.1|](#)  
[gi|220699065|gb|EED55404.1|](#)  
[gi|220695578|gb|EED51921.1|](#)  
[gi|220693985|gb|EED50330.1|](#)  
[gi|220694594|gb|EED50938.1|](#)  
[gi|220696680|gb|EED53022.1|](#)  
[gi|220688465|gb|EED44818.1|](#)  
[gi|220700344|gb|EED56682.1|](#)  
[gi|220697500|gb|EED53841.1|](#)  
[gi|220700881|gb|EED57219.1|](#)  
[gi|220697523|gb|EED53864.1|](#)  
[gi|220699291|gb|EED55630.1|](#)  
[gi|220700470|gb|EED56808.1|](#)  
[gi|220690774|gb|EED47123.1|](#)  
[gi|220691607|gb|EED47955.1|](#)  
[gi|220693628|gb|EED49973.1|](#)  
[gi|220693132|gb|EED49478.1|](#)  
[gi|220688475|gb|EED44828.1|](#)  
[gi|220692288|gb|EED48635.1|](#)  
[gi|220690385|gb|EED46735.1|](#)  
[gi|220699042|gb|EED55381.1|](#)  
[gi|220699676|gb|EED56015.1|](#)  
[gi|220697931|gb|EED54271.1|](#)  
[gi|209156402|pdb|2ZKA|A](#)  
[gi|46370500|gb|AAS90034.1|](#)  
[gi|220693637|gb|EED49982.1|](#)  
[gi|6714971|gb|AAF26223.1|AF159789\\_1](#)  
[gi|220699574|gb|EED55913.1|](#)  
[gi|220696542|gb|EED52884.1|](#)  
[gi|220692216|gb|EED48563.1|](#)  
[gi|220701302|gb|EED57640.1|](#)

ARP2/3 complex 34 kDa subunit , putative [Aspergillus flavus NRRL3  
 GTP-binding nuclear protein Ran, putative [Aspergillus flavus NRRL  
 Aspergillus parasiticus aflatoxin pathway gene cluster, complete s  
 mitochondrial 2-oxodicarboxylate carrier protein, putative [Asperg  
 peptidyl-prolyl cis-trans isomerase/cyclophilin, putative [Aspergi  
 60S ribosomal protein L35 [Aspergillus flavus NRRL3357]  
 intermembrane space AAA protease IAP-1 [Aspergillus flavus NRRL335  
 eukaryotic translation initiation factor 3 subunit EifCf, putative  
 protein transport protein Sec24, putative [Aspergillus flavus NRRL  
 prohibitin, putative [Aspergillus flavus NRRL3357]  
 nitroreductase family protein, putative [Aspergillus flavus NRRL33  
 60S ribosomal protein L19 [Aspergillus flavus NRRL3357]  
 AIF-like mitochondrial oxidoreductase (Nfr1), putative [Aspergillu  
 50S ribosomal protein L24 [Aspergillus flavus NRRL3357]  
 aminopeptidase P, putative [Aspergillus flavus NRRL3357]  
 conserved hypothetical protein [Aspergillus flavus NRRL3357]  
 NADH-ubiquinone oxidoreductase 49 kDa subunit, putative [Aspergill  
 cystathionine beta-synthase, putative [Aspergillus flavus NRRL3357  
 xanthine-guanine phosphoribosyl transferase Xpt1, putative [Asperg  
 DNA mismatch repair protein Msh3 [Aspergillus flavus NRRL3357]  
 ATP dependent RNA helicase (Dbp1), putative [Aspergillus flavus NRI  
 casein kinase, putative [Aspergillus flavus NRRL3357]  
 proteasome component Pup3, putative [Aspergillus flavus NRRL3357]  
 40S ribosomal protein S8e [Aspergillus flavus NRRL3357]  
 40S ribosomal protein S13 [Aspergillus flavus NRRL3357]  
 thioredoxin reductase Trr1/Trr2, putative [Aspergillus flavus NRRL  
 ubiquitin C-terminal hydrolase, putative [Aspergillus flavus NRRL3  
 COPII-coated vesicle protein SurF4/Erv29, putative [Aspergillus fl  
 Hsp90 binding co-chaperone (Sba1), putative [Aspergillus flavus NRI  
 mitochondrial outer membrane protein (Sam50), putative [Aspergillu  
 NADH-ubiquinone oxidoreductase 304 kDa subunit precursor [Aspergil  
 dihydrolipoamide succinyltransferase, putative [Aspergillus flavus  
 homocitrate synthase [Aspergillus flavus NRRL3357]  
 cAMP-dependent protein kinase regulatory subunit PkaR [Aspergillus  
 poly(A)+ RNA transport protein (UbaA), putative [Aspergillus flavu  
 Chain A, Urate Oxidase Complexed With 8-Azaxanthine Under 1.0 Mpa (  
 OmtB [Aspergillus flavus]  
 ADP-ribosylation factor, putative [Aspergillus flavus NRRL3357]  
 O-methyltransferase B [Aspergillus flavus]  
 eukaryotic translation initiation factor subunit, putative [Asperg  
 NADH-ubiquinone dehydrogenase 24 kDa subunit, putative [Aspergillu  
 60S acidic ribosomal protein P1 [Aspergillus flavus NRRL3357]  
 glutathione oxidoreductase Glr1, putative [Aspergillus flavus NRRL

|                                                      |                                                                                 |
|------------------------------------------------------|---------------------------------------------------------------------------------|
| <a href="#">gi 220699939 gb EED56278.1 </a>          | cytochrome b5, putative [Aspergillus flavus NRRL3357]                           |
| <a href="#">gi 220697662 gb EED54003.1 </a>          | branched-chain amino acid aminotransferase, cytosolic [Aspergillus              |
| <a href="#">gi 46370637 gb AAS90104.1 </a>           | OmtA [Aspergillus flavus]                                                       |
| <a href="#">gi 46370555 gb AAS90087.1 </a>           | OmtA [Aspergillus flavus]                                                       |
| <a href="#">gi 413844 gb AAA32698.1 </a>             | O-methyltransferase [Aspergillus flavus]                                        |
| <a href="#">gi 220700882 gb EED57220.1 </a>          | valyl-tRNA synthetase [Aspergillus flavus NRRL3357]                             |
| <a href="#">gi 220694687 gb EED51031.1 </a>          | GMP synthase [Aspergillus flavus NRRL3357]                                      |
| <a href="#">gi 220692642 gb EED48988.1 </a>          | mycelial catalase Cat1 [Aspergillus flavus NRRL3357]                            |
| <a href="#">gi 220694061 gb EED50405.1 </a>          | oxidoreductase, putative [Aspergillus flavus NRRL3357]                          |
| <a href="#">gi 220689997 gb EED46347.1 </a>          | plasma membrane H <sup>+</sup> -ATPase Pmal [Aspergillus flavus NRRL3357]       |
| <a href="#">gi 220694335 gb EED50679.1 </a>          | MFS monosaccharide transporter, putative [Aspergillus flavus NRRL3              |
| <a href="#">gi 220689217 gb EED45568.1 </a>          | opsin, putative [Aspergillus flavus NRRL3357]                                   |
| <a href="#">gi 220693342 gb EED49687.1 </a>          | phosphoglucomutase, putative [Aspergillus flavus NRRL3357]                      |
| <a href="#">gi 220699827 gb EED56166.1 </a>          | catalase, putative [Aspergillus flavus NRRL3357]                                |
| <a href="#">gi 220690790 gb EED47139.1 </a>          | glutamine synthetase [Aspergillus flavus NRRL3357]                              |
| <a href="#">gi 220698453 gb EED54793.1 </a>          | nucleolar protein nop5 [Aspergillus flavus NRRL3357]                            |
| <a href="#">gi 220701606 gb EED57944.1 </a>          | eukaryotic translation initiation factor 3 subunit 2i, putative [A              |
| <a href="#">gi 220696664 gb EED53006.1 </a>          | cytosolic hydroxymethyltransferase, putative [Aspergillus flavus N              |
| <a href="#">gi 220691646 gb EED47994.1 </a>          | plasma membrane H <sup>(+)</sup> ATPase, putative [Aspergillus flavus NRRL3357] |
| <a href="#">gi 220691457 gb EED47805.1 </a>          | fatty acid desaturase family protein [Aspergillus flavus NRRL3357]              |
| <a href="#">gi 220701658 gb EED57996.1 </a>          | eukaryotic translation initiation factor 4, putative [Aspergillus               |
| <a href="#">gi 220699434 gb EED55773.1 </a>          | trehalose synthase (Ccg-9), putative [Aspergillus flavus NRRL3357]              |
| <a href="#">gi 220699831 gb EED56170.1 </a>          | leucyl-tRNA synthetase [Aspergillus flavus NRRL3357]                            |
| <a href="#">gi 220696823 gb EED53164.1 </a>          | actin-binding protein, putative [Aspergillus flavus NRRL3357]                   |
| <a href="#">gi 220696271 gb EED52613.1 </a>          | 40S ribosomal protein S10a [Aspergillus flavus NRRL3357]                        |
| <a href="#">gi 220696529 gb EED52871.1 </a>          | Mitochondrial ATP synthase epsilon chain domain-containing protein              |
| <a href="#">gi 220701312 gb EED57650.1 </a>          | Ribosomal protein S28e [Aspergillus flavus NRRL3357]                            |
| <a href="#">gi 220701329 gb EED57667.1 </a>          | 3-isopropylmalate dehydrogenase Leu2A [Aspergillus flavus NRRL3357              |
| <a href="#">gi 215478516 gb ACJ67040.1 </a>          | O-methyltransferase [Aspergillus flavus]                                        |
| <a href="#">gi 74273764 gb ABA01534.1 </a>           | O-methyltransferase [Aspergillus flavus]                                        |
| <a href="#">gi 8308126 gb AAF74483.1 AF261846_1</a>  | O-methyltransferase [Aspergillus flavus]                                        |
| <a href="#">gi 74273707 gb ABA01506.1 </a>           | O-methyltransferase [Aspergillus flavus]                                        |
| <a href="#">gi 74273732 gb ABA01518.1 </a>           | O-methyltransferase [Aspergillus flavus]                                        |
| <a href="#">gi 114384135 gb ABI73969.1 </a>          | O-methyltransferase [Aspergillus flavus]                                        |
| <a href="#">gi 8308140 gb AAF74490.1 AF261853_1</a>  | O-methyltransferase [Aspergillus flavus]                                        |
| <a href="#">gi 2815742 gb AAC01647.1 </a>            | O-methyltransferase [Aspergillus flavus]                                        |
| <a href="#">gi 15193503 gb AAF74494.2 AF261857_1</a> | O-methyltransferase [Aspergillus flavus]                                        |
| <a href="#">gi 220699478 gb EED55817.1 </a>          | saccharopine dehydrogenase Lys1, putative [Aspergillus flavus NRRL              |
| <a href="#">gi 220690500 gb EED46849.1 </a>          | acyl-CoA dehydrogenase family protein [Aspergillus flavus NRRL3357              |
| <a href="#">gi 220690752 gb EED47101.1 </a>          | class II aldolase/adducin domain protein [Aspergillus flavus NRRL3              |
| <a href="#">gi 220695921 gb EED52263.1 </a>          | NADH-cytochrome B5 reductase, putative [Aspergillus flavus NRRL335              |
| <a href="#">gi 220692391 gb EED48738.1 </a>          | NADH-ubiquinone oxidoreductase 64 kDa subunit, putative [Aspergill              |
| <a href="#">gi 220689379 gb EED45730.1 </a>          | ubiquinol-cytochrome c reductase iron-sulfur subunit precursor [As              |



[gi|220695252|gb|EED51595.1|](#)  
[gi|220688981|gb|EED45333.1|](#)  
[gi|220701581|gb|EED57919.1|](#)  
[gi|220689713|gb|EED46063.1|](#)  
[gi|220695044|gb|EED51387.1|](#)  
[gi|220697363|gb|EED53704.1|](#)  
[gi|220692698|gb|EED49044.1|](#)  
[gi|220688938|gb|EED45290.1|](#)  
[gi|220698606|gb|EED54946.1|](#)  
[gi|220690532|gb|EED46881.1|](#)  
[gi|220696592|gb|EED52934.1|](#)  
[gi|220692623|gb|EED48969.1|](#)  
[gi|220696165|gb|EED52507.1|](#)  
[gi|220694386|gb|EED50730.1|](#)  
[gi|220695459|gb|EED51802.1|](#)  
[gi|220698176|gb|EED54516.1|](#)  
[gi|220701102|gb|EED57440.1|](#)  
[gi|220700807|gb|EED57145.1|](#)  
[gi|220699111|gb|EED55450.1|](#)  
[gi|220689935|gb|EED46285.1|](#)  
[gi|220701509|gb|EED57847.1|](#)  
[gi|220690835|gb|EED47184.1|](#)  
[gi|220689366|gb|EED45717.1|](#)  
[gi|220696697|gb|EED53039.1|](#)  
[gi|220689881|gb|EED46231.1|](#)  
[gi|220693660|gb|EED50005.1|](#)  
[gi|220693774|gb|EED50119.1|](#)  
[gi|220698304|gb|EED54644.1|](#)  
[gi|220700181|gb|EED56520.1|](#)  
[gi|220698578|gb|EED54918.1|](#)  
[gi|220697943|gb|EED54283.1|](#)  
[gi|220697660|gb|EED54001.1|](#)  
[gi|220699758|gb|EED56097.1|](#)  
[gi|220699360|gb|EED55699.1|](#)  
[gi|220690750|gb|EED47099.1|](#)  
[gi|220692901|gb|EED49247.1|](#)  
[gi|220698099|gb|EED54439.1|](#)  
[gi|220696140|gb|EED52482.1|](#)  
[gi|220700026|gb|EED56365.1|](#)  
[gi|220697448|gb|EED53789.1|](#)  
[gi|220692210|gb|EED48557.1|](#)  
[gi|220701562|gb|EED57900.1|](#)  
[gi|220699124|gb|EED55463.1|](#)

GTP cyclohydrolase II, putative [Aspergillus flavus NRRL3357]  
 U5 snRNP component Snull4, putative [Aspergillus flavus NRRL3357]  
 proteasome regulatory particle subunit (RpnL), putative [Aspergillus  
 dynamin family GTPase, putative [Aspergillus flavus NRRL3357]  
 NADH-ubiquinone oxidoreductase subunit B17.2, putative [Aspergillus  
 possible apospory-associated protein c [Aspergillus flavus NRRL3357]  
 60S ribosomal protein L24a [Aspergillus flavus NRRL3357]  
 cystathionine gamma-lyase [Aspergillus flavus NRRL3357]  
 30S ribosomal subunit S4, putative [Aspergillus flavus NRRL3357]  
 aldo/keto reductase, putative [Aspergillus flavus NRRL3357]  
 acetyl-CoA carboxylase, putative [Aspergillus flavus NRRL3357]  
 mitochondrial phosphate carrier protein, putative [Aspergillus fla  
 Fasciclin domain family protein [Aspergillus flavus NRRL3357]  
 mitochondrial phosphate transporter Pic2, putative [Aspergillus fl  
 glutaminyl-tRNA synthetase [Aspergillus flavus NRRL3357]  
 pentafunctional polypeptide (AroM), putative [Aspergillus flavus NI  
 Phe-inhibited DAHP synthase AroG [Aspergillus flavus NRRL3357]  
 protein phosphatase PP2A regulatory B subunit, putative [Aspergill  
 hypothetical protein AFLA\_027220 [Aspergillus flavus NRRL3357]  
 NADH-ubiquinone oxidoreductase 9.5 kDa subunit, putative [Aspergil  
 eukaryotic translation initiation factor 3 subunit EifCk, putative  
 aldehyde dehydrogenase, putative [Aspergillus flavus NRRL3357]  
 UDP-glucose 4-epimerase [Aspergillus flavus NRRL3357]  
 actin-bundling protein Sac6, putative [Aspergillus flavus NRRL3357]  
 conserved hypothetical protein [Aspergillus flavus NRRL3357]  
 conserved hypothetical protein [Aspergillus flavus NRRL3357]  
 RNase L inhibitor of the ABC superfamily, putative [Aspergillus fl  
 60S ribosomal protein L3 [Aspergillus flavus NRRL3357]  
 proteasome subunit alpha type 3, putative [Aspergillus flavus NRRL  
 aminotransferase, class V, putative [Aspergillus flavus NRRL3357]  
 aldehyde dehydrogenase family protein, putative [Aspergillus flavu  
 casein kinase II beta subunit CKB1 [Aspergillus flavus NRRL3357]  
 60S ribosomal protein L31e [Aspergillus flavus NRRL3357]  
 proliferating cell nuclear antigen (PCNA) [Aspergillus flavus NRRL  
 methylmalonate-semialdehyde dehydrogenase, putative [Aspergillus f  
 disulfide isomerase (TigA), putative [Aspergillus flavus NRRL3357]  
 26S proteasome regulatory subunit S5A [Aspergillus flavus NRRL3357]  
 glycine dehydrogenase [Aspergillus flavus NRRL3357]  
 phosphoenolpyruvate carboxykinase AcuF [Aspergillus flavus NRRL3357]  
 mitochondrial hypoxia responsive domain protein [Aspergillus flavu  
 40S ribosomal protein S26 [Aspergillus flavus NRRL3357]  
 regulatory protein SUAPRGAL [Aspergillus flavus NRRL3357]  
 saccharopine dehydrogenase Lys9, putative [Aspergillus flavus NRRL

[gi|220699549|gb|EED55888.1|](#)  
[gi|220695582|gb|EED51925.1|](#)  
[gi|220699084|gb|EED55423.1|](#)  
[gi|220694197|gb|EED50541.1|](#)  
[gi|220694193|gb|EED50537.1|](#)  
[gi|220691333|gb|EED47681.1|](#)  
[gi|220693980|gb|EED50325.1|](#)  
[gi|220692310|gb|EED48657.1|](#)  
[gi|220701423|gb|EED57761.1|](#)  
[gi|220696618|gb|EED52960.1|](#)  
[gi|220691712|gb|EED48060.1|](#)  
[gi|220693972|gb|EED50317.1|](#)  
[gi|220698373|gb|EED54713.1|](#)  
[gi|220698336|gb|EED54676.1|](#)  
[gi|220701739|gb|EED58077.1|](#)  
[gi|220691683|gb|EED48031.1|](#)  
[gi|3845477|dbj|BAA34135.1|](#)  
[gi|220692549|gb|EED48895.1|](#)  
[gi|220699128|gb|EED55467.1|](#)  
[gi|220701045|gb|EED57383.1|](#)  
[gi|220694187|gb|EED50531.1|](#)  
[gi|220689992|gb|EED46342.1|](#)  
[gi|8308146|gb|AAF74493.1|AF261856\\_1](#)  
[gi|220697698|gb|EED54038.1|](#)  
[gi|220691608|gb|EED47956.1|](#)  
[gi|220690403|gb|EED46752.1|](#)  
[gi|220690768|gb|EED47117.1|](#)  
[gi|220692215|gb|EED48562.1|](#)  
[gi|220699636|gb|EED55975.1|](#)  
[gi|220697818|gb|EED54158.1|](#)  
[gi|220701324|gb|EED57662.1|](#)  
[gi|220699278|gb|EED55617.1|](#)  
[gi|220694833|gb|EED51177.1|](#)  
[gi|220694637|gb|EED50981.1|](#)  
[gi|220698104|gb|EED54444.1|](#)  
[gi|220700658|gb|EED56996.1|](#)  
[gi|220697389|gb|EED53730.1|](#)  
[gi|89212054|gb|ABD63389.1|](#)  
[gi|220701646|gb|EED57984.1|](#)  
[gi|220690307|gb|EED46657.1|](#)  
[gi|220690854|gb|EED47203.1|](#)  
[gi|220701288|gb|EED57626.1|](#)  
[gi|220692411|gb|EED48758.1|](#)

SNARE-dependent exocytosis protein (Sro7), putative [Aspergillus f.  
 pyridoxine biosynthesis protein [Aspergillus flavus NRRL3357]  
 3-ketoacyl-coA thiolase peroxisomal A precursor [Aspergillus flavu:  
 cytochrome c subunit Vb, putative [Aspergillus flavus NRRL3357]  
 ribosomal protein L34 protein, putative [Aspergillus flavus NRRL33  
 phospholipase D (PLD), putative [Aspergillus flavus NRRL3357]  
 adenine phosphoribosyltransferase 1 [Aspergillus flavus NRRL3357]  
 proteasome component Pre9, putative [Aspergillus flavus NRRL3357]  
 Hsp70 family chaperone Lhs1/Orp150, putative [Aspergillus flavus N  
 glutathione S-transferase, putative [Aspergillus flavus NRRL3357]  
 homocysteine synthase CysD [Aspergillus flavus NRRL3357]  
 mRNA binding post-transcriptional regulator (Csx1), putative [Aspe:  
 phosphoketolase, putative [Aspergillus flavus NRRL3357]  
 peroxiredoxin, putative [Aspergillus flavus NRRL3357]  
 40S ribosomal protein S11 [Aspergillus flavus NRRL3357]  
 vacuolar aspartyl aminopeptidase Lap4, putative [Aspergillus flavu:  
 cytochrome b [Aspergillus flavus]  
 tyrosyl-tRNA synthetase [Aspergillus flavus NRRL3357]  
 ubiquinol-cytochrome c reductase complex 17 kd protein [Aspergillu:  
 TPR domain protein [Aspergillus flavus NRRL3357]  
 secretory pathway protein Ssp120, putative [Aspergillus flavus NRR:  
 ran GTPase activating protein 1 (RNA1 protein) [Aspergillus flavus  
 O-methyltransferase [Aspergillus flavus]  
 hypothetical protein AFLA\_012900 [Aspergillus flavus NRRL3357]  
 endosomal cargo receptor (Erp3), putative [Aspergillus flavus NRRL  
 nucleosome assembly protein Nap1, putative [Aspergillus flavus NRR:  
 histidyl-tRNA synthetase, mitochondrial precursor [Aspergillus fla  
 conserved hypothetical protein [Aspergillus flavus NRRL3357]  
 phosphoglycolate phosphatase, putative [Aspergillus flavus NRRL335  
 conserved hypothetical protein [Aspergillus flavus NRRL3357]  
 fatty acid hydroxylase, putative [Aspergillus flavus NRRL3357]  
 tartrate dehydrogenase, putative [Aspergillus flavus NRRL3357]  
 aflU / cypA / P450 monooxygenase [Aspergillus flavus NRRL3357]  
 histone H4, putative [Aspergillus flavus NRRL3357]  
 acetylglutamate kinase, putative [Aspergillus flavus NRRL3357]  
 cytokinesis EF-hand protein Cdc4, putative [Aspergillus flavus NRR:  
 aldehyde dehydrogenase, putative [Aspergillus flavus NRRL3357]  
 O-methyltransferase B [Aspergillus parasiticus]  
 pyruvate dehydrogenase complex component Pdx1, putative [Aspergill:  
 cytoskeleton assembly control protein Sla2, putative [Aspergillus :  
 MAP kinase MpkA [Aspergillus flavus NRRL3357]  
 mitochondrial F1F0-ATP synthase g subunit, putative [Aspergillus f.  
 cytoplasmic asparaginyl-tRNA synthetase, putative [Aspergillus fla

[gi|220688822|gb|EED45174.1|](#)  
[gi|45477402|gb|AAS66025.1|](#)  
[gi|220697554|gb|EED53895.1|](#)  
[gi|220699123|gb|EED55462.1|](#)  
[gi|220689776|gb|EED46126.1|](#)  
[gi|220699286|gb|EED55625.1|](#)  
[gi|220696411|gb|EED52753.1|](#)  
[gi|220696354|gb|EED52696.1|](#)  
[gi|8308154|gb|AAF74497.1|AF261860\\_1](#)  
[gi|220699888|gb|EED56227.1|](#)  
[gi|220697813|gb|EED54153.1|](#)  
[gi|220700182|gb|EED56521.1|](#)  
[gi|220697521|gb|EED53862.1|](#)  
[gi|220692396|gb|EED48743.1|](#)  
[gi|220698230|gb|EED54570.1|](#)  
[gi|220694974|gb|EED51317.1|](#)  
[gi|220691400|gb|EED47748.1|](#)  
[gi|220697454|gb|EED53795.1|](#)  
[gi|220697382|gb|EED53723.1|](#)  
[gi|220700631|gb|EED56969.1|](#)  
[gi|220694211|gb|EED50555.1|](#)  
[gi|220697584|gb|EED53925.1|](#)  
[gi|220698460|gb|EED54800.1|](#)  
[gi|220701477|gb|EED57815.1|](#)  
[gi|220697844|gb|EED54184.1|](#)  
[gi|220700656|gb|EED56994.1|](#)  
[gi|220691491|gb|EED47839.1|](#)  
[gi|220700052|gb|EED56391.1|](#)  
[gi|220698436|gb|EED54776.1|](#)  
[gi|220691415|gb|EED47763.1|](#)  
[gi|220694306|gb|EED50650.1|](#)  
[gi|46370483|gb|AAS90018.1|](#)  
[gi|220693839|gb|EED50184.1|](#)  
[gi|220696817|gb|EED53158.1|](#)  
[gi|220699236|gb|EED55575.1|](#)  
[gi|1762235|gb|AAC23536.1|](#)  
[gi|220688427|gb|EED44780.1|](#)  
[gi|220699699|gb|EED56038.1|](#)  
[gi|220696458|gb|EED52800.1|](#)  
[gi|220692426|gb|EED48773.1|](#)  
[gi|220694178|gb|EED50522.1|](#)  
[gi|220700573|gb|EED56911.1|](#)  
[gi|220691595|gb|EED47943.1|](#)

nonribosomal peptide synthase, putative [Aspergillus flavus NRRL33  
 hypothetical protein [Aspergillus parasiticus]  
 diphosphomevalonate decarboxylase [Aspergillus flavus NRRL3357]  
 Aha1 domain family [Aspergillus flavus NRRL3357]  
 Glycosyl hydrolases family 32 superfamily [Aspergillus flavus NRRL  
 30S ribosomal protein S7, putative [Aspergillus flavus NRRL3357]  
 carbamoyl-phosphate synthase, large subunit [Aspergillus flavus NR  
 mannitol-1-phosphate dehydrogenase [Aspergillus flavus NRRL3357]  
 O-methyltransferase [Aspergillus flavus]  
 GTP binding protein, putative [Aspergillus flavus NRRL3357]  
 pyrroline-5-carboxylate reductase [Aspergillus flavus NRRL3357]  
 DMRL synthase family protein [Aspergillus flavus NRRL3357]  
 60S ribosomal protein L36 [Aspergillus flavus NRRL3357]  
 mitochondrial F1F0 ATP synthase subunit F (Atp17), putative [Asper  
 conserved hypothetical protein [Aspergillus flavus NRRL3357]  
 chromosome segregation protein Cse1, putative [Aspergillus flavus  
 proteasome component Pre6, putative [Aspergillus flavus NRRL3357]  
 peptide N-myristoyl transferase (Nmt1) [Aspergillus flavus NRRL335  
 conserved hypothetical protein [Aspergillus flavus NRRL3357]  
 phospholipase PldA, putative [Aspergillus flavus NRRL3357]  
 conserved hypothetical protein [Aspergillus flavus NRRL3357]  
 methionine aminopeptidase, type II, putative [Aspergillus flavus NR  
 ribosomal protein S15, putative [Aspergillus flavus NRRL3357]  
 Sec23/Sec24 family protein [Aspergillus flavus NRRL3357]  
 protein phosphatase 2A catalytic subunit Pph21, putative [Aspergil  
 metallopeptidase MepB [Aspergillus flavus NRRL3357]  
 arylsulfatase, putative [Aspergillus flavus NRRL3357]  
 carbon catabolite repression protein CreD, putative [Aspergillus f  
 glycolipid transfer protein HET-C2, putative [Aspergillus flavus NR  
 actin interacting protein 2 [Aspergillus flavus NRRL3357]  
 orotate phosphoribosyltransferase [Aspergillus flavus NRRL3357]  
 OmtA [Aspergillus flavus]  
 conserved hypothetical protein [Aspergillus flavus NRRL3357]  
 phosphoserine aminotransferase [Aspergillus flavus NRRL3357]  
 transmembrane protein 14, putative [Aspergillus flavus NRRL3357]  
 polyketide synthase PKSL2 [Aspergillus parasiticus]  
 polyketide synthase, putative [Aspergillus flavus NRRL3357]  
 phosphatidylinositol transporter, putative [Aspergillus flavus NRR  
 aspartate transaminase, putative [Aspergillus flavus NRRL3357]  
 oligosaccharyl transferase subunit (alpha), putative [Aspergillus :  
 Arp2/3 complex subunit (Arp3), putative [Aspergillus flavus NRRL33  
 structure-specific recognition protein, putative [Aspergillus flav  
 exonuclease Kem1, putative [Aspergillus flavus NRRL3357]

[gi|220690781|gb|EED47130.1|](#)  
[gi|220694223|gb|EED50567.1|](#)  
[gi|220698074|gb|EED54414.1|](#)

tubulin beta subunit [Aspergillus flavus NRRL3357]  
 KH domain RNA-binding protein [Aspergillus flavus NRRL3357]  
 NADH-ubiquinone oxidoreductase 12 kda subunit, putative [Aspergill

### Aspergillus Decoy False discovery rate

|                                                      |      |    |        |
|------------------------------------------------------|------|----|--------|
| Peptide matches above identity threshold             | 2604 | 22 | 0.84 % |
| Peptide matches above homology or identity threshold | 3345 | 97 | 2.90 % |

## Select Summary Report

Format As  [Help](#)

Significance threshold p<  Max. number of hits

Standard scoring  MudPIT scoring  Ions score or expect cut-off  Show sub-sets

Show pop-ups  Suppress pop-ups  Sort unassigned  Require bold red

1. [gi|220689386|gb|EED45737.1|](#) Mass: 55369 Score: 4307 Queries matched: 231 emPAI: 16.94  
 ATP synthase F1, beta subunit, putative [Aspergillus flavus NRRL3357]

| Query                | Observed | Mr(expt)  | Mr(calc)  | Delta   | Miss | Score | Expect  | Rank | Peptide                                                                                                                                                                               |
|----------------------|----------|-----------|-----------|---------|------|-------|---------|------|---------------------------------------------------------------------------------------------------------------------------------------------------------------------------------------|
| <a href="#">4</a>    | 609.3310 | 608.3237  | 608.2806  | 0.0431  | 0    | 17    | 2.5     | 1    | K.FEGEK.L                                                                                                                                                                             |
| <a href="#">763</a>  | 488.5926 | 975.1707  | 974.5549  | 0.6158  | 0    | 44    | 0.0071  | 1    | K.IGLFGGAGVGK.T <a href="#">758</a> <a href="#">759</a> <a href="#">761</a> <a href="#">765</a> <a href="#">767</a>                                                                   |
| <a href="#">887</a>  | 500.8601 | 999.7057  | 999.5600  | 0.1457  | 1    | 45    | 0.0055  | 1    | K.LLALENKA.- <a href="#">882</a> <a href="#">884</a> <a href="#">885</a>                                                                                                              |
| <a href="#">1221</a> | 537.6926 | 1073.3707 | 1071.6288 | 1.7419  | 1    | 33    | 0.084   | 1    | K.LVDLKDITR.S                                                                                                                                                                         |
| <a href="#">1448</a> | 558.8551 | 1115.6957 | 1115.6339 | 0.0618  | 0    | 52    | 0.0011  | 1    | K.VVDLLAPYAR.G <a href="#">1447</a> <a href="#">1449</a> <a href="#">1451</a> <a href="#">1463</a> <a href="#">1464</a>                                                               |
| <a href="#">1727</a> | 583.7901 | 1165.5657 | 1165.5801 | -0.0144 | 0    | 75    | 4.9e-06 | 1    | R.VQQLQEYK.S <a href="#">1732</a>                                                                                                                                                     |
| <a href="#">2322</a> | 632.6851 | 1263.3557 | 1262.7347 | 0.6210  | 0    | 29    | 0.21    | 1    | K.VHQVIGAVVDVK.F <a href="#">2314</a> <a href="#">2315</a> <a href="#">2317</a> <a href="#">2320</a> <a href="#">2323</a> <a href="#">2328</a> <a href="#">2330</a> <a href="#">2</a> |
| <a href="#">2475</a> | 640.1306 | 1278.2467 | 1277.6285 | 0.6182  | 0    | (62)  | 0.00011 | 1    | R.TIAMEGTEGLTR.G <a href="#">2474</a> <a href="#">2476</a> <a href="#">2492</a>                                                                                                       |
| <a href="#">2625</a> | 648.6861 | 1295.3577 | 1293.6235 | 1.7343  | 0    | 77    | 3.2e-06 | 1    | R.TIAMEGTEGLTR.G <a href="#">2598</a> <a href="#">2602</a> <a href="#">2607</a> <a href="#">2611</a> <a href="#">2612</a> <a href="#">2615</a> <a href="#">2618</a> <a href="#">2</a> |
| <a href="#">2895</a> | 664.6266 | 1327.2387 | 1326.6779 | 0.5608  | 0    | 62    | 0.00011 | 1    | R.ILNVTGDPVDER.G <a href="#">2884</a> <a href="#">2894</a> <a href="#">2898</a> <a href="#">2924</a> <a href="#">2926</a>                                                             |
| <a href="#">3381</a> | 688.3971 | 1374.7797 | 1374.6528 | 0.1269  | 0    | 62    | 0.00013 | 1    | R.IVQDHYDTATR.V <a href="#">3378</a> <a href="#">3385</a> <a href="#">3397</a> <a href="#">3400</a>                                                                                   |
| <a href="#">3879</a> | 718.6546 | 1435.2947 | 1434.7467 | 0.5480  | 0    | 81    | 1.3e-06 | 1    | R.FTQAGSEVSALLGR.I <a href="#">3877</a> <a href="#">3888</a> <a href="#">3889</a> <a href="#">3895</a> <a href="#">3898</a> <a href="#">3902</a> <a href="#">3905</a>                 |
| <a href="#">3883</a> | 718.8501 | 1435.6857 | 1435.6844 | 0.0013  | 0    | 79    | 1.9e-06 | 1    | K.AHGGYSVFTGVGER.T <a href="#">3894</a> <a href="#">3899</a> <a href="#">3900</a> <a href="#">3907</a> <a href="#">3912</a> <a href="#">3918</a>                                      |
| <a href="#">4053</a> | 727.5011 | 1452.9877 | 1452.7977 | 0.1901  | 0    | 90    | 1.6e-07 | 1    | R.VALTGLTIAEYFR.D <a href="#">4060</a> <a href="#">4074</a>                                                                                                                           |
| <a href="#">4472</a> | 752.4016 | 1502.7887 | 1501.8504 | 0.9383  | 0    | 87    | 3.4e-07 | 1    | K.TVFIQELINNIK.A <a href="#">4454</a> <a href="#">4456</a> <a href="#">4458</a> <a href="#">4473</a> <a href="#">4474</a> <a href="#">4476</a> <a href="#">4480</a> .                 |
| <a href="#">5292</a> | 793.6841 | 1585.3537 | 1584.8082 | 0.5455  | 0    | 78    | 2.4e-06 | 1    | K.VALVFGQMNEPPGAR.A <a href="#">5307</a> <a href="#">5308</a> <a href="#">5312</a>                                                                                                    |
| <a href="#">5463</a> | 801.2826 | 1600.5507 | 1600.8032 | -0.2524 | 0    | (70)  | 1.5e-05 | 1    | K.VALVFGQMNEPPGAR.A <a href="#">5454</a> <a href="#">5470</a> <a href="#">5477</a> <a href="#">5478</a> <a href="#">5483</a> <a href="#">5490</a> <a href="#">549</a>                 |
| <a href="#">5739</a> | 811.7191 | 1621.4237 | 1620.8835 | 0.5402  | 0    | 63    | 7.4e-05 | 1    | R.DTGAPITIPVGPGLGR.I <a href="#">5729</a> <a href="#">5738</a>                                                                                                                        |
| <a href="#">6698</a> | 847.0141 | 1692.0137 | 1690.9366 | 1.0771  | 0    | 58    | 0.00026 | 1    | K.LVLEVSQHLGENVVR.T <a href="#">6661</a> <a href="#">6673</a> <a href="#">6682</a> <a href="#">6685</a> <a href="#">6686</a> <a href="#">6687</a> <a href="#">669</a>                 |



|                       |           |           |           |         |   |       |         |   |                                  |                                                                                                                               |
|-----------------------|-----------|-----------|-----------|---------|---|-------|---------|---|----------------------------------|-------------------------------------------------------------------------------------------------------------------------------|
| <a href="#">6920</a>  | 855.5741  | 1709.1337 | 1707.9156 | 1.2182  | 1 | 45    | 0.0045  | 1 | R.ILNVTGDPVDERGPVK.A             | <a href="#">6906</a> <a href="#">6918</a>                                                                                     |
| <a href="#">7069</a>  | 863.2091  | 1724.4037 | 1723.9104 | 0.4933  | 0 | 86    | 3.5e-07 | 1 | K.LPAILNAIETENNGQK.L             | <a href="#">7082</a> <a href="#">7085</a> <a href="#">7087</a> <a href="#">7088</a>                                           |
| <a href="#">7578</a>  | 888.1171  | 1774.2197 | 1772.9196 | 1.3001  | 0 | 44    | 0.0057  | 1 | R.GISELGIYPAVDPLDSK.S            | <a href="#">7568</a> <a href="#">7570</a> <a href="#">7571</a> <a href="#">7575</a>                                           |
| <a href="#">8391</a>  | 619.2879  | 1854.8417 | 1853.0047 | 1.8370  | 1 | 1     | 1.2e+02 | 9 | K.VHQVIGAVVDVKFEQEK.L            |                                                                                                                               |
| <a href="#">9375</a>  | 985.0011  | 1967.9877 | 1968.0357 | -0.0480 | 0 | 99    | 1.7e-08 | 1 | R.FLSQPFTVAQVFTGIEGK.L           | <a href="#">9374</a> <a href="#">9383</a> <a href="#">9386</a> <a href="#">9389</a> <a href="#">9391</a> <a href="#">9392</a> |
| <a href="#">9760</a>  | 672.7395  | 2015.1967 | 2016.0528 | -0.8560 | 1 | 14    | 5.1     | 1 | R.GISELGIYPAVDPLDSKSR.M          | <a href="#">9761</a>                                                                                                          |
| <a href="#">10106</a> | 684.0532  | 2049.1377 | 2047.1174 | 2.0203  | 1 | 0     | 1.3e+02 | 3 | R.GAAARDTGAPITIPVGPGLGR.I        |                                                                                                                               |
| <a href="#">10208</a> | 1031.2881 | 2060.5617 | 2060.0347 | 0.5270  | 0 | (110) | 1.4e-09 | 1 | K.SLQDIIAILGMDELSEADK.L          | <a href="#">10210</a> <a href="#">10213</a> <a href="#">10220</a> <a href="#">10232</a>                                       |
| <a href="#">10350</a> | 1039.9356 | 2077.8567 | 2076.0296 | 1.8271  | 0 | 111   | 9.7e-10 | 1 | K.SLQDIIAILGMDELSEADK.L          | <a href="#">10335</a> <a href="#">10342</a> <a href="#">10349</a>                                                             |
| <a href="#">11399</a> | 1110.7321 | 2219.4497 | 2219.0715 | 0.3783  | 0 | 95    | 4e-08   | 1 | R.IPSAVGYQPTLAVDMGGMQER.I        | <a href="#">11400</a> <a href="#">11405</a>                                                                                   |
| <a href="#">11498</a> | 1118.8276 | 2235.6407 | 2235.0664 | 0.5743  | 0 | (46)  | 0.0029  | 1 | R.IPSAVGYQPTLAVDMGGMQER.I        | <a href="#">11499</a>                                                                                                         |
| <a href="#">11515</a> | 1119.5021 | 2236.9897 | 2235.0664 | 1.9233  | 0 | (7)   | 25      | 2 | R.IPSAVGYQPTLAVDMGGMQER.I        | <a href="#">11514</a>                                                                                                         |
| <a href="#">11592</a> | 1126.9181 | 2251.8217 | 2251.0613 | 0.7604  | 0 | (41)  | 0.0094  | 1 | R.IPSAVGYQPTLAVDMGGMQER.I        |                                                                                                                               |
| <a href="#">12070</a> | 773.0085  | 2316.0037 | 2314.1804 | 1.8233  | 1 | 34    | 0.045   | 1 | K.FEKEKLPAILNAIETENNGQK.L        |                                                                                                                               |
| <a href="#">13386</a> | 836.2849  | 2505.8327 | 2505.1329 | 0.6998  | 0 | 53    | 0.00058 | 1 | R.EGNDLYHEMQETGVIQLEGESK.V       | <a href="#">13397</a> <a href="#">13400</a> <a href="#">13402</a>                                                             |
| <a href="#">13498</a> | 841.2899  | 2520.8477 | 2521.1278 | -0.2801 | 0 | (2)   | 71      | 9 | R.EGNDLYHEMQETGVIQLEGESK.V       |                                                                                                                               |
| <a href="#">14303</a> | 1330.5031 | 2658.9917 | 2658.3786 | 0.6132  | 1 | 119   | 1.4e-10 | 1 | K.SLQDIIAILGMDELSEADKLTVER.A     | <a href="#">14302</a> <a href="#">14307</a> <a href="#">14314</a> <a href="#">1432</a>                                        |
| <a href="#">14349</a> | 1334.4561 | 2666.8977 | 2666.2534 | 0.6444  | 0 | 94    | 4.1e-08 | 1 | K.AIINGEADDLPEAAFYMGDLESAR.A     | <a href="#">14357</a> <a href="#">14359</a> <a href="#">14362</a> <a href="#">143</a>                                         |
| <a href="#">14430</a> | 892.9522  | 2675.8347 | 2674.3735 | 1.4612  | 1 | (55)  | 0.00038 | 1 | K.SLQDIIAILGMDELSEADKLTVER.A     | <a href="#">14410</a> <a href="#">14417</a> <a href="#">14426</a> <a href="#">1442</a>                                        |
| <a href="#">14478</a> | 1342.9146 | 2683.8147 | 2682.2483 | 1.5664  | 0 | (53)  | 0.00052 | 1 | K.AIINGEADDLPEAAFYMGDLESAR.A     | <a href="#">14476</a>                                                                                                         |
| <a href="#">15035</a> | 1415.0256 | 2828.0367 | 2827.4280 | 0.6088  | 0 | 73    | 5.2e-06 | 1 | K.YAPIHAEAPEFVEQSTEGEILVTGIK.V   | <a href="#">15036</a> <a href="#">15039</a> <a href="#">15040</a> <a href="#">15</a>                                          |
| <a href="#">15106</a> | 948.2915  | 2841.8527 | 2839.5080 | 2.3447  | 2 | 3     | 51      | 1 | R.LASTEAGATGKVHQVIGAVVDVKFEQEK.L |                                                                                                                               |
| <a href="#">15221</a> | 960.8539  | 2879.5397 | 2881.3803 | -1.8406 | 1 | 2     | 68      | 1 | K.AIINGEADDLPEAAFYMGDLESARAK.G   | <a href="#">15224</a>                                                                                                         |
| <a href="#">16210</a> | 1120.4445 | 3358.3117 | 3356.7292 | 1.5825  | 1 | 57    | 0.0002  | 1 | R.VALTGLTIAEYFRDEEGQDVLLFDNIFR.F |                                                                                                                               |

2. [gi|220700135|gb|EED56474.1|](#) Mass: 47434 Score: 3041 Queries matched: 152 emPAI: 3.70

enolase/allergen Asp F 22 [Aspergillus flavus NRRL3357]

| Query                | Observed | Mr(expt)  | Mr(calc)  | Delta   | Miss | Score | Expect  | Rank | Peptide                                                                                                                                                               |
|----------------------|----------|-----------|-----------|---------|------|-------|---------|------|-----------------------------------------------------------------------------------------------------------------------------------------------------------------------|
| <a href="#">161</a>  | 378.9596 | 755.9047  | 755.4653  | 0.4394  | 0    | 33    | 0.072   | 1    | K.LNQILR.I <a href="#">157</a> <a href="#">158</a> <a href="#">159</a> <a href="#">160</a> <a href="#">163</a>                                                        |
| <a href="#">502</a>  | 451.8541 | 901.6937  | 901.5055  | 0.1882  | 0    | 55    | 0.00066 | 1    | K.ACNALLLK.V <a href="#">500</a> <a href="#">501</a> <a href="#">503</a>                                                                                              |
| <a href="#">590</a>  | 922.9430 | 921.9357  | 921.4556  | 0.4801  | 0    | 21    | 1.2     | 1    | R.QGAEVYQK.L                                                                                                                                                          |
| <a href="#">608</a>  | 464.9511 | 927.8877  | 927.4702  | 0.4176  | 1    | 31    | 0.12    | 1    | K.KYDLDFK.N                                                                                                                                                           |
| <a href="#">1191</a> | 535.2076 | 1068.4007 | 1067.6815 | 0.7193  | 1    | 11    | 11      | 5    | R.LAKLNQILR.I                                                                                                                                                         |
| <a href="#">3215</a> | 681.1271 | 1360.2397 | 1359.6380 | 0.6017  | 0    | (64)  | 6.6e-05 | 1    | K.IAMDVASSEFYK.A <a href="#">3214</a> <a href="#">3217</a> <a href="#">3219</a> <a href="#">3223</a> <a href="#">3227</a> <a href="#">3230</a> <a href="#">3234</a>   |
| <a href="#">3394</a> | 688.7436 | 1375.4727 | 1375.6329 | -0.1602 | 0    | 64    | 6.4e-05 | 1    | K.IAMDVASSEFYK.A <a href="#">3392</a> <a href="#">3395</a> <a href="#">3401</a>                                                                                       |
| <a href="#">4840</a> | 771.9471 | 1541.8797 | 1541.7766 | 0.1032  | 0    | 58    | 0.00022 | 1    | K.WLTYEQLADLYK.T <a href="#">4837</a> <a href="#">4838</a> <a href="#">4845</a> <a href="#">4867</a>                                                                  |
| <a href="#">4848</a> | 772.2606 | 1542.5067 | 1540.8249 | 1.6818  | 0    | 64    | 6e-05   | 1    | K.GVPLYAHISDLAGTK.K <a href="#">4834</a>                                                                                                                              |
| <a href="#">5152</a> | 787.1736 | 1572.3327 | 1571.8519 | 0.4809  | 0    | 77    | 3.1e-06 | 1    | K.VNQIGTLTESIQAAK.D <a href="#">5148</a> <a href="#">5153</a> <a href="#">5154</a> <a href="#">5155</a> <a href="#">5170</a> <a href="#">5173</a> <a href="#">518</a> |
| <a href="#">5621</a> | 806.8786 | 1611.7427 | 1610.9355 | 0.8072  | 0    | 95    | 4.6e-08 | 1    | K.SNLGANAILGVSLAIK.A <a href="#">5598</a> <a href="#">5600</a> <a href="#">5601</a> <a href="#">5603</a> <a href="#">5605</a> <a href="#">5607</a> <a href="#">5</a>  |
| <a href="#">5849</a> | 544.4005 | 1630.1797 | 1629.7158 | 0.4639  | 1    | 31    | 0.11    | 1    | K.YDLDFKNPDSDDSSK.W                                                                                                                                                   |

|                       |           |           |           |         |   |      |         |    |                               |                                                                                                                                                    |
|-----------------------|-----------|-----------|-----------|---------|---|------|---------|----|-------------------------------|----------------------------------------------------------------------------------------------------------------------------------------------------|
| <a href="#">5907</a>  | 818.7121  | 1635.4097 | 1635.7100 | -0.3003 | 0 | 86   | 4.2e-07 | 1  | K.DSYADNWGVMVSHR.S            | <a href="#">5905</a> <a href="#">5917</a> <a href="#">5922</a> <a href="#">5934</a> <a href="#">5937</a>                                           |
| <a href="#">6121</a>  | 826.6656  | 1651.3167 | 1648.7944 | 2.5224  | 0 | 23   | 0.76    | 1  | R.IEEELGNNAIYAGEK.F           |                                                                                                                                                    |
| <a href="#">7292</a>  | 874.0411  | 1746.0677 | 1744.8843 | 1.1834  | 0 | 108  | 2.3e-09 | 1  | R.SGETEDVTIADIAVGLR.S         | <a href="#">7264</a> <a href="#">7268</a> <a href="#">7274</a> <a href="#">7275</a> <a href="#">7279</a> <a href="#">7280</a> <a href="#">7281</a> |
| <a href="#">7376</a>  | 879.8711  | 1757.7277 | 1757.8108 | -0.0831 | 2 | 97   | 2.8e-08 | 1  | K.KYDLDFKNPDSOSSK.W           | <a href="#">7377</a> <a href="#">7381</a>                                                                                                          |
| <a href="#">8104</a>  | 912.6196  | 1823.2247 | 1821.9221 | 1.3026  | 0 | 43   | 0.0065  | 1  | R.GNPTVEVDVVTETGLHR.A         | <a href="#">8090</a> <a href="#">8092</a> <a href="#">8095</a> <a href="#">8097</a> <a href="#">8098</a> <a href="#">8099</a> <a href="#">8100</a> |
| <a href="#">8214</a>  | 613.2092  | 1836.6057 | 1836.0006 | 0.6051  | 2 | 11   |         | 2  | K.THWGGKGV LKA VENVNK.T       |                                                                                                                                                    |
| <a href="#">8449</a>  | 930.7696  | 1859.5247 | 1858.9286 | 0.5962  | 0 | 107  | 3e-09   | 1  | R.AIVPSGASTGQHEAHEL.R.D       | <a href="#">8432</a> <a href="#">8455</a> <a href="#">8458</a> <a href="#">8460</a>                                                                |
| <a href="#">9563</a>  | 996.7051  | 1991.3957 | 1990.0008 | 1.3950  | 0 | 91   | 1.1e-07 | 1  | K.TSDFQIVGDDLTVTNPLR.I        | <a href="#">9532</a> <a href="#">9534</a> <a href="#">9558</a> <a href="#">9567</a> <a href="#">9569</a> <a href="#">9573</a>                      |
| <a href="#">10780</a> | 713.7889  | 2138.3447 | 2138.2059 | 0.1389  | 1 | 1    | 1.1e+02 | 7  | K.SNLGANAILGVSLAIKAGAAEK.G    |                                                                                                                                                    |
| <a href="#">12007</a> | 770.6239  | 2308.8497 | 2306.2284 | 2.6213  | 0 | 29   | 0.15    | 1  | K.KPYVLPVPFQNV LGGSHAGGR.L    | <a href="#">11997</a> <a href="#">11999</a> <a href="#">12000</a> <a href="#">12001</a> <a href="#">12002</a>                                      |
| <a href="#">12027</a> | 1156.3136 | 2310.6127 | 2310.1718 | 0.4409  | 0 | 66   | 3.1e-05 | 1  | R.LAFQEFMIVPSAAPS FSEALR.Q    | <a href="#">12022</a> <a href="#">12025</a> <a href="#">12028</a> <a href="#">12029</a> <a href="#">12030</a>                                      |
| <a href="#">12149</a> | 1164.3561 | 2326.6977 | 2326.1667 | 0.5310  | 0 | (66) | 3.6e-05 | 1  | R.LAFQEFMIVPSAAPS FSEALR.Q    | <a href="#">12148</a> <a href="#">12150</a> <a href="#">12156</a> <a href="#">12157</a> <a href="#">12158</a>                                      |
| <a href="#">12426</a> | 792.3479  | 2374.0217 | 2372.1172 | 1.9045  | 1 | 7    |         | 26 | K.NPDSOSSKWLTYEQLADLYK.T      |                                                                                                                                                    |
| <a href="#">15197</a> | 1436.9706 | 2871.9267 | 2869.2799 | 2.6468  | 0 | 92   | 6.5e-08 | 1  | K.YPIVSIEDPFAEDDWEAWSYFYK.T   | <a href="#">15188</a> <a href="#">15189</a> <a href="#">15195</a>                                                                                  |
| <a href="#">15210</a> | 959.1935  | 2874.5587 | 2872.4130 | 2.1457  | 2 | 5    |         | 35 | K.NPDSOSSKWLTYEQLADLYKTLASK.Y |                                                                                                                                                    |

3. [gi|220699546|gb|EED55885.1|](#) Mass: 63457 Score: 2763 Queries matched: 186 emPAI: 5.81

pyruvate decarboxylase PdcA, putative [Aspergillus flavus NRRL3357]

| Query                 | Observed  | Mr(expt)  | Mr(calc)  | Delta   | Miss | Score | Expect  | Rank | Peptide                                                                                                                                                                                  |
|-----------------------|-----------|-----------|-----------|---------|------|-------|---------|------|------------------------------------------------------------------------------------------------------------------------------------------------------------------------------------------|
| <a href="#">172</a>   | 763.5390  | 762.5317  | 762.3483  | 0.1834  | 0    | 13    | 9.3     | 1    | R.ECWIR.S                                                                                                                                                                                |
| <a href="#">366</a>   | 856.9270  | 855.9197  | 855.4086  | 0.5111  | 0    | 5     | 47      | 4    | K.GAVDETHK.N                                                                                                                                                                             |
| <a href="#">1923</a>  | 603.6796  | 1205.3447 | 1203.6322 | 1.7125  | 0    | (34)  | 0.064   | 1    | K.SGLPTFVAPMGK.G <a href="#">1925</a>                                                                                                                                                    |
| <a href="#">2015</a>  | 611.6426  | 1221.2707 | 1219.6271 | 1.6436  | 0    | 44    | 0.0069  | 1    | K.SGLPTFVAPMGK.G <a href="#">2007</a> <a href="#">2010</a> <a href="#">2019</a>                                                                                                          |
| <a href="#">2439</a>  | 639.1111  | 1276.2077 | 1274.5489 | 1.6588  | 0    | 42    | 0.01    | 1    | R.YSEYPDINMK.G <a href="#">2429</a>                                                                                                                                                      |
| <a href="#">2606</a>  | 647.7731  | 1293.5317 | 1293.5626 | -0.0309 | 0    | 67    | 3.3e-05 | 1    | K.SDFNTTGFYSYR.I <a href="#">2600</a> <a href="#">2604</a> <a href="#">2608</a> <a href="#">2609</a> <a href="#">2615</a> <a href="#">2618</a> <a href="#">2634</a> <a href="#">2636</a> |
| <a href="#">3052</a>  | 672.6726  | 1343.3307 | 1342.6769 | 0.6538  | 0    | 57    | 0.00032 | 1    | R.VLDEVHEFVEK.S                                                                                                                                                                          |
| <a href="#">3114</a>  | 676.2246  | 1350.4347 | 1349.7343 | 0.7004  | 0    | 61    | 0.00012 | 1    | R.KPIDVAEYLF.R <a href="#">3103</a> <a href="#">3116</a> <a href="#">3118</a> <a href="#">3119</a> <a href="#">3126</a> <a href="#">3127</a> <a href="#">3132</a>                        |
| <a href="#">3158</a>  | 678.2741  | 1354.5337 | 1353.7802 | 0.7535  | 0    | 66    | 3.7e-05 | 1    | K.KPVILVDACAIR.H <a href="#">3152</a> <a href="#">3153</a> <a href="#">3162</a>                                                                                                          |
| <a href="#">5119</a>  | 785.6696  | 1569.3247 | 1567.7379 | 1.5868  | 0    | 68    | 2.7e-05 | 1    | K.NYGGVYAGTGSNPGVR.E <a href="#">5108</a> <a href="#">5117</a>                                                                                                                           |
| <a href="#">5897</a>  | 818.0826  | 1634.1507 | 1635.8369 | -1.6862 | 1    | 1     | 1.2e+02 | 6    | R.HRVLDEVHEFVEK.S <a href="#">5895</a>                                                                                                                                                   |
| <a href="#">6802</a>  | 851.3951  | 1700.7757 | 1700.9196 | -0.1439 | 0    | 116   | 3.4e-10 | 1    | R.EQVSSDLILSIGAIK.S <a href="#">6785</a> <a href="#">6786</a> <a href="#">6794</a> <a href="#">6798</a> <a href="#">6799</a> <a href="#">6803</a> <a href="#">6804</a>                   |
| <a href="#">6901</a>  | 854.7931  | 1707.5717 | 1705.9073 | 1.6644  | 0    | 44    | 0.0057  | 1    | R.SRPVYISLPTDMVTK.K <a href="#">6893</a> <a href="#">6898</a>                                                                                                                            |
| <a href="#">7062</a>  | 862.7351  | 1723.4557 | 1721.9022 | 1.5535  | 0    | (41)  | 0.01    | 1    | R.SRPVYISLPTDMVTK.K <a href="#">7041</a> <a href="#">7052</a> <a href="#">7056</a> <a href="#">7058</a>                                                                                  |
| <a href="#">7437</a>  | 882.6751  | 1763.3357 | 1762.8989 | 0.4368  | 0    | 2     |         | 90   | R.LDTPLDLSLPPNDPEK.E                                                                                                                                                                     |
| <a href="#">7440</a>  | 882.7431  | 1763.4717 | 1762.9002 | 0.5715  | 0    | 81    | 1.1e-06 | 1    | R.IGQLNTIDFHSYVR.V <a href="#">7439</a> <a href="#">7451</a> <a href="#">7452</a> <a href="#">7453</a> <a href="#">7456</a> <a href="#">7461</a> <a href="#">7471</a>                    |
| <a href="#">8477</a>  | 622.3329  | 1863.9767 | 1860.9985 | 2.9782  | 1    | 4     |         | 50   | K.EDYVVDVVLKYLHAAK.K                                                                                                                                                                     |
| <a href="#">9602</a>  | 998.4836  | 1994.9527 | 1993.9745 | 0.9782  | 0    | 30    | 0.14    | 1    | K.DVVITETGTANFGIWDTR.F <a href="#">9603</a>                                                                                                                                              |
| <a href="#">10008</a> | 1020.8191 | 2039.6237 | 2040.0680 | -0.4443 | 0    | 89    | 1.8e-07 | 1    | R.AVHGVPGDYNLVALDYLPK.C <a href="#">10012</a> <a href="#">10014</a> <a href="#">10017</a> <a href="#">10027</a> <a href="#">10031</a>                                                    |
| <a href="#">10822</a> | 1072.9361 | 2143.8577 | 2143.0269 | 0.8308  | 0    | 53    | 0.00063 | 1    | K.DGMLLHHTLGN GDFNVFTR.M <a href="#">10824</a> <a href="#">10826</a> <a href="#">10852</a> <a href="#">10853</a>                                                                         |
| <a href="#">10955</a> | 721.4975  | 2161.4707 | 2159.0219 | 2.4489  | 0    | (12)  | 7.1     | 1    | K.DGMLLHHTLGN GDFNVFTR.M <a href="#">10954</a>                                                                                                                                           |

|                       |           |           |           |         |   |      |         |   |                                                                                                                                      |
|-----------------------|-----------|-----------|-----------|---------|---|------|---------|---|--------------------------------------------------------------------------------------------------------------------------------------|
| <a href="#">11175</a> | 1096.8091 | 2191.6037 | 2191.0943 | 0.5094  | 0 | (64) | 5.3e-05 | 1 | R.MGNLNVGPVSPPSNLLPDNEK.A <a href="#">11177</a> <a href="#">11208</a>                                                                |
| <a href="#">11299</a> | 1104.8046 | 2207.5947 | 2207.0892 | 0.5055  | 0 | 67   | 2.7e-05 | 1 | R.MGNLNVGPVSPPSNLLPDNEK.A <a href="#">11298</a> <a href="#">11307</a>                                                                |
| <a href="#">11612</a> | 752.2705  | 2253.7897 | 2251.1121 | 2.6776  | 1 | 52   | 0.00085 | 1 | K.EKDVVITETGTANFGIWDTR.F <a href="#">11588</a> <a href="#">11590</a> <a href="#">11594</a> <a href="#">11595</a> <a href="#">115</a> |
| <a href="#">11771</a> | 1140.7841 | 2279.5537 | 2278.1416 | 1.4122  | 0 | 74   | 4.9e-06 | 1 | R.NNLNPIIFVICNEGYTIER.Y <a href="#">11757</a> <a href="#">11760</a> <a href="#">11762</a> <a href="#">11770</a> <a href="#">1177</a> |
| <a href="#">12177</a> | 777.6382  | 2329.8927 | 2330.3157 | -0.4230 | 2 | 4    | 54      | 5 | K.YLHAAKRPVILVDACAIRHR.V                                                                                                             |
| <a href="#">12773</a> | 1212.4586 | 2422.9027 | 2422.2434 | 0.6594  | 0 | 66   | 2.8e-05 | 1 | K.ASTEQAITHAWLWPTVGQWLK.E <a href="#">12760</a> <a href="#">12785</a> <a href="#">12786</a>                                          |
| <a href="#">14562</a> | 1351.5366 | 2701.0587 | 2700.3040 | 0.7548  | 0 | 52   | 0.00072 | 1 | R.ELFANEEFASAPCLQLVELHMPR.D <a href="#">14564</a> <a href="#">14566</a> <a href="#">14567</a> <a href="#">14573</a>                  |
| <a href="#">14658</a> | 906.9689  | 2717.8847 | 2716.2989 | 1.5859  | 0 | (38) | 0.015   | 1 | R.ELFANEEFASAPCLQLVELHMPR.D <a href="#">14652</a> <a href="#">14660</a>                                                              |
| <a href="#">15289</a> | 975.4579  | 2923.3517 | 2922.5114 | 0.8403  | 1 | 65   | 3.2e-05 | 1 | R.LDTPDLDSLPPNDPEKEDYVVDVVLK.Y <a href="#">15285</a> <a href="#">15286</a> <a href="#">15290</a> <a href="#">15</a>                  |
| <a href="#">15375</a> | 1482.1936 | 2962.3727 | 2961.3994 | 0.9733  | 0 | 109  | 1.2e-09 | 1 | R.MSADISCTGLCLNSTHEVATLIDNAIR.E <a href="#">15373</a> <a href="#">15376</a> <a href="#">15378</a>                                    |
| <a href="#">15410</a> | 993.5282  | 2977.5627 | 2977.3943 | 0.1684  | 0 | (47) | 0.002   | 1 | R.MSADISCTGLCLNSTHEVATLIDNAIR.E <a href="#">15415</a> <a href="#">15416</a>                                                          |
| <a href="#">15569</a> | 1018.2539 | 3051.7397 | 3049.5695 | 2.1702  | 0 | 67   | 2.2e-05 | 1 | R.FPAGVTAISQVLWGSIGYSVGCQGAALAAK.E <a href="#">15557</a> <a href="#">15561</a> <a href="#">155</a>                                   |
| <a href="#">15823</a> | 1055.4452 | 3163.3137 | 3162.5603 | 0.7534  | 0 | 46   | 0.0023  | 1 | R.YIHGWEAVYNDIQPWDFLNIPVAFGAK.D <a href="#">15826</a> <a href="#">15827</a> <a href="#">15828</a>                                    |
| <a href="#">15911</a> | 1071.5842 | 3211.7307 | 3212.7339 | -1.0032 | 2 | 4    | 34      | 2 | K.GVLQKIVQRMGNLNVGPVSPPSNLLPDNEK.A                                                                                                   |

4. [gi|220700832|gb|EED57170.1|](#) Mass: 60129 Score: 2308 Queries matched: 173 emPAI: 2.40

mitochondrial F1 ATPase subunit alpha, putative [Aspergillus flavus NRRL3357]

| Query                | Observed  | Mr(expt)  | Mr(calc)  | Delta   | Miss | Score | Expect  | Rank | Peptide                                                                                                                                                              |
|----------------------|-----------|-----------|-----------|---------|------|-------|---------|------|----------------------------------------------------------------------------------------------------------------------------------------------------------------------|
| <a href="#">101</a>  | 359.0511  | 716.0877  | 715.4480  | 0.6398  | 0    | 36    | 0.053   | 1    | R.LTELLK.Q <a href="#">99</a>                                                                                                                                        |
| <a href="#">115</a>  | 362.3291  | 722.6437  | 722.4439  | 0.1998  | 0    | 45    | 0.0047  | 1    | K.APGILPR.R <a href="#">112</a> <a href="#">114</a> <a href="#">116</a>                                                                                              |
| <a href="#">190</a>  | 777.3580  | 776.3507  | 776.3916  | -0.0408 | 0    | 26    | 0.58    | 1    | K.ETEASLK.E                                                                                                                                                          |
| <a href="#">256</a>  | 815.3980  | 814.3907  | 814.4548  | -0.0641 | 0    | 27    | 0.33    | 1    | R.ELIIGDR.Q <a href="#">257</a> <a href="#">258</a> <a href="#">259</a> <a href="#">261</a>                                                                          |
| <a href="#">270</a>  | 818.4940  | 817.4867  | 817.4294  | 0.0574  | 1    | 10    | 23      | 5    | K.EGETVKR.T                                                                                                                                                          |
| <a href="#">337</a>  | 423.5326  | 845.0507  | 844.5018  | 0.5489  | 0    | 65    | 7.5e-05 | 1    | R.STVAQLVK.T <a href="#">334</a> <a href="#">335</a> <a href="#">336</a> <a href="#">339</a> <a href="#">340</a>                                                     |
| <a href="#">385</a>  | 431.1001  | 860.1857  | 859.4949  | 0.6908  | 0    | (24)  | 0.92    | 1    | R.QMSLLLR.R                                                                                                                                                          |
| <a href="#">436</a>  | 438.9421  | 875.8697  | 875.4899  | 0.3799  | 0    | 31    | 0.16    | 2    | R.QMSLLLR.R <a href="#">437</a>                                                                                                                                      |
| <a href="#">537</a>  | 456.1766  | 910.3387  | 909.5072  | 0.8315  | 0    | 37    | 0.028   | 1    | K.LFLAQYR.E <a href="#">532</a> <a href="#">534</a> <a href="#">536</a>                                                                                              |
| <a href="#">816</a>  | 986.5440  | 985.5367  | 985.5556  | -0.0189 | 0    | 35    | 0.061   | 1    | R.VLSVGDGIAR.V <a href="#">814</a> <a href="#">821</a>                                                                                                               |
| <a href="#">895</a>  | 501.6046  | 1001.1947 | 1000.6029 | 0.5918  | 1    | 9     | 23      | 5    | K.RSTVAQLVK.T                                                                                                                                                        |
| <a href="#">1085</a> | 1048.5100 | 1047.5027 | 1047.5746 | -0.0719 | 1    | 11    | 16      | 4    | K.AMKQVAGSLK.L                                                                                                                                                       |
| <a href="#">1311</a> | 545.7766  | 1089.5387 | 1088.6012 | 0.9375  | 1    | 10    | 18      | 2    | R.VGSAAQVKAMK.Q                                                                                                                                                      |
| <a href="#">1660</a> | 575.6406  | 1149.2667 | 1148.5318 | 0.7349  | 0    | 57    | 0.00036 | 1    | K.CVDSMVPIGR.G <a href="#">1661</a>                                                                                                                                  |
| <a href="#">1750</a> | 585.8456  | 1169.6767 | 1169.6404 | 0.0363  | 0    | 45    | 0.0055  | 1    | R.SVNQPVQTGLK.C <a href="#">1747</a> <a href="#">1748</a> <a href="#">1749</a> <a href="#">1754</a> <a href="#">1756</a>                                             |
| <a href="#">1881</a> | 1197.7070 | 1196.6997 | 1196.6401 | 0.0596  | 0    | 53    | 0.00078 | 1    | R.VVDALGNPIDGK.G <a href="#">1878</a> <a href="#">1882</a> <a href="#">1884</a> <a href="#">1887</a> <a href="#">1899</a>                                            |
| <a href="#">2055</a> | 615.2386  | 1228.4627 | 1228.6775 | -0.2148 | 1    | 10    | 15      | 1    | R.ELIIGDRQTGK.T <a href="#">2058</a>                                                                                                                                 |
| <a href="#">2413</a> | 637.5896  | 1273.1647 | 1272.6714 | 0.4933  | 0    | 72    | 1.2e-05 | 1    | R.HAVIIYDLSK.Q <a href="#">2408</a> <a href="#">2410</a> <a href="#">2412</a> <a href="#">2417</a> <a href="#">2420</a> <a href="#">2421</a> <a href="#">2422</a>    |
| <a href="#">2773</a> | 657.6781  | 1313.3417 | 1312.6849 | 0.6568  | 0    | 10    | 17      | 4    | K.LYCIYVAVGQK.R                                                                                                                                                      |
| <a href="#">2793</a> | 658.8406  | 1315.6667 | 1315.6368 | 0.0299  | 0    | 84    | 6.3e-07 | 1    | R.GVQEEAGLAETGR.V <a href="#">2791</a> <a href="#">2792</a> <a href="#">2795</a> <a href="#">2797</a> <a href="#">2801</a> <a href="#">2805</a> <a href="#">2808</a> |
| <a href="#">3273</a> | 683.2801  | 1364.5457 | 1363.6480 | 0.8977  | 2    | 6     | 42      | 6    | K.RWNNTSDESKK.L                                                                                                                                                      |
| <a href="#">3334</a> | 1371.6890 | 1370.6817 | 1370.6677 | 0.0140  | 0    | 36    | 0.042   | 1    | K.SNNPEIQEAIEK.E <a href="#">3336</a>                                                                                                                                |

|                       |           |           |           |         |   |      |         |     |                            |                                                                                                                                                    |
|-----------------------|-----------|-----------|-----------|---------|---|------|---------|-----|----------------------------|----------------------------------------------------------------------------------------------------------------------------------------------------|
| <a href="#">3714</a>  | 708.7586  | 1415.5027 | 1415.7256 | -0.2229 | 0 | 71   | 1.1e-05 | 1   | K.ASPTEVSSILEQR.I          | <a href="#">3717</a> <a href="#">3735</a> <a href="#">3739</a> <a href="#">3740</a>                                                                |
| <a href="#">3867</a>  | 478.5692  | 1432.6857 | 1429.7711 | 2.9146  | 1 | 8    |         | 26  | K.TAVALDAMLNQR.W           |                                                                                                                                                    |
| <a href="#">4926</a>  | 517.4992  | 1549.4757 | 1547.8606 | 1.6151  | 1 | 4    |         | 61  | K.QAVAYRQMSLLLR.R          |                                                                                                                                                    |
| <a href="#">4988</a>  | 778.5981  | 1555.1817 | 1552.7310 | 2.4507  | 0 | 35   | 0.045   | 1   | R.EAYPGDVFYLHSR.L          | <a href="#">4982</a> <a href="#">4985</a> <a href="#">4991</a>                                                                                     |
| <a href="#">5441</a>  | 800.7646  | 1599.5147 | 1598.8457 | 0.6691  | 0 | 71   | 1.2e-05 | 1   | K.ILQWESDFLAHLK.S          | <a href="#">5428</a> <a href="#">5440</a> <a href="#">5447</a> <a href="#">5453</a> <a href="#">5455</a> <a href="#">5459</a> <a href="#">5462</a> |
| <a href="#">6116</a>  | 826.3686  | 1650.7227 | 1649.8988 | 0.8239  | 0 | 37   | 0.03    | 1   | R.TGEIVDVPVGPPELLGR.V      | <a href="#">6103</a> <a href="#">6104</a> <a href="#">6117</a> <a href="#">6122</a> <a href="#">6129</a> <a href="#">6131</a> <a href="#">61</a>   |
| <a href="#">7242</a>  | 871.4756  | 1740.9367 | 1739.8366 | 1.1001  | 0 | 79   | 2e-06   | 1   | R.EVAFAQFQGSDDLDAATK.Q     | <a href="#">7179</a> <a href="#">7182</a> <a href="#">7188</a> <a href="#">7189</a> <a href="#">7193</a> <a href="#">7195</a> <a href="#">7</a>    |
| <a href="#">9915</a>  | 678.6955  | 2033.0647 | 2032.0623 | 1.0025  | 2 | 4    |         | 57  | K.RSTVAQLVKTLEENDAMK.Y     | <a href="#">9913</a>                                                                                                                               |
| <a href="#">10791</a> | 1071.2151 | 2140.4157 | 2138.9911 | 1.4246  | 0 | (5)  |         | 45  | K.GMCMNLEAGQGVVLFSGDR.L    | <a href="#">10789</a>                                                                                                                              |
| <a href="#">10849</a> | 1073.8536 | 2145.6927 | 2144.0572 | 1.6355  | 0 | 107  | 2.7e-09 | 1   | R.VHGMTNVQAEELVEFASGVK.G   | <a href="#">10816</a> <a href="#">10820</a> <a href="#">10821</a> <a href="#">10828</a> <a href="#">108</a>                                        |
| <a href="#">10882</a> | 717.2365  | 2148.6877 | 2150.0855 | -1.3978 | 1 | 4    |         | 48  | R.TYAAEAKASPTTEVSSILEQR.I  |                                                                                                                                                    |
| <a href="#">10924</a> | 719.5772  | 2155.7097 | 2154.9861 | 0.7237  | 0 | (10) |         | 13  | K.GMCMNLEAGQGVVLFSGDR.L    | <a href="#">10919</a>                                                                                                                              |
| <a href="#">10935</a> | 1079.4736 | 2156.9327 | 2154.9861 | 1.9467  | 0 | 19   |         | 1.4 | K.GMCMNLEAGQGVVLFSGDR.L    |                                                                                                                                                    |
| <a href="#">11050</a> | 1087.4826 | 2172.9507 | 2170.9810 | 1.9698  | 0 | (7)  |         | 28  | K.GMCMNLEAGQGVVLFSGDR.L    |                                                                                                                                                    |
| <a href="#">12185</a> | 778.5979  | 2332.7717 | 2334.2120 | -1.4403 | 2 | 14   |         | 4.9 | R.EAYPGDVFYLHSRLLERAAK.M   |                                                                                                                                                    |
| <a href="#">12920</a> | 815.2602  | 2442.7587 | 2440.2679 | 2.4908  | 2 | 1    | 1e+02   | 4   | R.RSVNQPVQTGLKCVDSMVPIGR.G |                                                                                                                                                    |
| <a href="#">13315</a> | 833.0165  | 2496.0277 | 2495.2335 | 0.7942  | 1 | 3    |         | 61  | K.GMCMNLEAGQGVVLFSGDRLVK.E |                                                                                                                                                    |

5. [gi|220694557|gb|EED50901.1|](#) Mass: 94681 Score: 1847 Queries matched: 122 emPAI: 1.77

translation elongation factor EF-2 subunit, putative [Aspergillus flavus NRRL3357]

| Query                | Observed  | Mr(expt)  | Mr(calc)  | Delta   | Miss | Score | Expect  | Rank | Peptide            |                                                                |
|----------------------|-----------|-----------|-----------|---------|------|-------|---------|------|--------------------|----------------------------------------------------------------|
| <a href="#">60</a>   | 684.6450  | 683.6377  | 684.2901  | -0.6524 | 0    | 4     | 48      | 6    | R.FMDTR.A          |                                                                |
| <a href="#">737</a>  | 485.5646  | 969.1147  | 968.5403  | 0.5744  | 0    | 60    | 0.00017 | 1    | R.GGGQIIPAR.R      | <a href="#">732</a> <a href="#">734</a> <a href="#">735</a>    |
| <a href="#">782</a>  | 978.8000  | 977.7927  | 977.4342  | 0.3585  | 0    | 9     | 22      | 1    | K.FDDPEDLK.E       |                                                                |
| <a href="#">828</a>  | 987.6260  | 986.6187  | 986.5396  | 0.0791  | 0    | 10    | 20      | 10   | K.IIDAVTNNK.R      | <a href="#">823</a> <a href="#">825</a>                        |
| <a href="#">1018</a> | 518.3756  | 1034.7367 | 1034.5397 | 0.1971  | 0    | 36    | 0.047   | 1    | K.ISDPVVSYP.E      | <a href="#">1016</a> <a href="#">1017</a> <a href="#">1020</a> |
| <a href="#">1034</a> | 520.1546  | 1038.2947 | 1036.7008 | 1.5939  | 0    | 22    | 1       | 1    | R.IKPVLIIINK.I     | <a href="#">1028</a>                                           |
| <a href="#">1236</a> | 539.2191  | 1076.4237 | 1076.5866 | -0.1629 | 0    | 46    | 0.0051  | 1    | K.AVQYLNEIK.D      | <a href="#">1237</a>                                           |
| <a href="#">1439</a> | 558.0276  | 1114.0407 | 1113.5124 | 0.5283  | 0    | 39    | 0.021   | 1    | R.EGPVAEEPMPR.A    | <a href="#">1435</a>                                           |
| <a href="#">1545</a> | 566.0271  | 1130.0397 | 1129.5074 | 0.5324  | 0    | (29)  | 0.26    | 1    | R.EGPVAEEPMPR.A    |                                                                |
| <a href="#">1841</a> | 1189.3780 | 1188.3707 | 1187.5782 | 0.7925  | 0    | 10    | 18      | 3    | K.STDADGKPLER.A    |                                                                |
| <a href="#">2113</a> | 619.6521  | 1237.2897 | 1236.5928 | 0.6970  | 0    | 55    | 0.00054 | 1    | R.LWGDNFFNPK.T     | <a href="#">2111</a>                                           |
| <a href="#">2154</a> | 622.7826  | 1243.5507 | 1243.5292 | 0.0216  | 0    | 47    | 0.0031  | 1    | K.EDLYQNFCR.I      | <a href="#">2152</a>                                           |
| <a href="#">2204</a> | 625.3581  | 1248.7017 | 1248.6682 | 0.0335  | 1    | 4     | 65      | 10   | K.IQRTVLMMGK.T     |                                                                |
| <a href="#">2378</a> | 635.6601  | 1269.3057 | 1269.6928 | -0.3871 | 1    | 14    | 5.7     | 3    | R.SVEVKNAADLPK.L   |                                                                |
| <a href="#">2563</a> | 645.5886  | 1289.1627 | 1288.7503 | 0.4124  | 2    | 7     | 32      | 8    | K.EDLFIKKIQR.T     |                                                                |
| <a href="#">2852</a> | 662.0566  | 1322.0987 | 1321.6514 | 0.4473  | 0    | 52    | 0.001   | 1    | K.DLEEDHAGVPLK.I   | <a href="#">2850</a> <a href="#">2855</a>                      |
| <a href="#">3135</a> | 676.8951  | 1351.7757 | 1351.6521 | 0.1236  | 0    | 47    | 0.003   | 1    | K.DSVVSGFQWATR.E   |                                                                |
| <a href="#">3421</a> | 690.1651  | 1378.3157 | 1377.6850 | 0.6307  | 0    | 21    | 1.3     | 2    | K.EDPAPLMLYVSK.M   |                                                                |
| <a href="#">4098</a> | 730.3591  | 1458.7037 | 1455.7140 | 2.9897  | 1    | 1     | 1.1e+02 | 1    | R.EGPVAEEPMPRAVR.F |                                                                |



|                       |                           |                           |                           |                         |                   |                      |                         |                    |                                                                                                                                                                                       |
|-----------------------|---------------------------|---------------------------|---------------------------|-------------------------|-------------------|----------------------|-------------------------|--------------------|---------------------------------------------------------------------------------------------------------------------------------------------------------------------------------------|
| <a href="#">4567</a>  | <a href="#">759.2236</a>  | <a href="#">1516.4327</a> | <a href="#">1514.7228</a> | <a href="#">1.7099</a>  | <a href="#">0</a> | <a href="#">56</a>   | <a href="#">0.00042</a> | <a href="#">1</a>  | <a href="#">R.AFNQFCLDPIYK.I</a> <a href="#">4566</a>                                                                                                                                 |
| <a href="#">4711</a>  | <a href="#">765.7236</a>  | <a href="#">1529.4327</a> | <a href="#">1528.8712</a> | <a href="#">0.5615</a>  | <a href="#">1</a> | <a href="#">2</a>    | <a href="#">1.1e+02</a> | <a href="#">5</a>  | <a href="#">R.DQITTLVEKLEIK.L</a>                                                                                                                                                     |
| <a href="#">5318</a>  | <a href="#">794.8286</a>  | <a href="#">1587.6427</a> | <a href="#">1587.7457</a> | <a href="#">-0.1029</a> | <a href="#">1</a> | <a href="#">50</a>   | <a href="#">0.0015</a>  | <a href="#">1</a>  | <a href="#">K.EVVPGYENYDKL.-</a> <a href="#">5351</a> <a href="#">5356</a>                                                                                                            |
| <a href="#">5397</a>  | <a href="#">798.4086</a>  | <a href="#">1594.8027</a> | <a href="#">1593.8304</a> | <a href="#">0.9724</a>  | <a href="#">2</a> | <a href="#">9</a>    | <a href="#">17</a>      | <a href="#">2</a>  | <a href="#">R.LWGDNFFNPKTKK.W</a> <a href="#">5404</a>                                                                                                                                |
| <a href="#">5814</a>  | <a href="#">814.6956</a>  | <a href="#">1627.3767</a> | <a href="#">1626.6984</a> | <a href="#">0.6783</a>  | <a href="#">0</a> | <a href="#">109</a>  | <a href="#">2e-09</a>   | <a href="#">1</a>  | <a href="#">R.LMADDYGWDVTDAR.K</a> <a href="#">5819</a>                                                                                                                               |
| <a href="#">5996</a>  | <a href="#">822.6621</a>  | <a href="#">1643.3097</a> | <a href="#">1642.6933</a> | <a href="#">0.6164</a>  | <a href="#">0</a> | <a href="#">(85)</a> | <a href="#">5.2e-07</a> | <a href="#">1</a>  | <a href="#">R.LMADDYGWDVTDAR.K</a> <a href="#">5972</a> <a href="#">5998</a>                                                                                                          |
| <a href="#">6890</a>  | <a href="#">569.8045</a>  | <a href="#">1706.3917</a> | <a href="#">1704.8756</a> | <a href="#">1.5161</a>  | <a href="#">1</a> | <a href="#">22</a>   | <a href="#">0.84</a>    | <a href="#">1</a>  | <a href="#">K.AGSKEDPAPLMLYVSK.M</a>                                                                                                                                                  |
| <a href="#">6917</a>  | <a href="#">855.4731</a>  | <a href="#">1708.9317</a> | <a href="#">1707.8931</a> | <a href="#">1.0387</a>  | <a href="#">0</a> | <a href="#">48</a>   | <a href="#">0.0021</a>  | <a href="#">1</a>  | <a href="#">R.IIETVNVTIATYEDK.V</a> <a href="#">6914</a> <a href="#">6915</a> <a href="#">6919</a> <a href="#">6923</a> <a href="#">6924</a> <a href="#">6928</a> <a href="#">692</a> |
| <a href="#">6958</a>  | <a href="#">857.1516</a>  | <a href="#">1712.2887</a> | <a href="#">1713.9162</a> | <a href="#">-1.6275</a> | <a href="#">1</a> | <a href="#">3</a>    | <a href="#">76</a>      | <a href="#">5</a>  | <a href="#">R.SGLQVRIQGPNYTPGK.K</a>                                                                                                                                                  |
| <a href="#">7043</a>  | <a href="#">861.9651</a>  | <a href="#">1721.9157</a> | <a href="#">1720.8705</a> | <a href="#">1.0452</a>  | <a href="#">1</a> | <a href="#">(4)</a>  | <a href="#">50</a>      | <a href="#">10</a> | <a href="#">K.AGSKEDPAPLMLYVSK.M</a>                                                                                                                                                  |
| <a href="#">7127</a>  | <a href="#">866.7591</a>  | <a href="#">1731.5037</a> | <a href="#">1730.8563</a> | <a href="#">0.6475</a>  | <a href="#">2</a> | <a href="#">6</a>    | <a href="#">35</a>      | <a href="#">5</a>  | <a href="#">K.MVPTSDKGRFYAFGR.V</a> <a href="#">7121</a>                                                                                                                              |
| <a href="#">7339</a>  | <a href="#">877.6446</a>  | <a href="#">1753.2747</a> | <a href="#">1752.8948</a> | <a href="#">0.3799</a>  | <a href="#">0</a> | <a href="#">73</a>   | <a href="#">6.9e-06</a> | <a href="#">1</a>  | <a href="#">K.GTVAFGSGLQWAFTR.Q</a> <a href="#">7334</a> <a href="#">7341</a> <a href="#">7348</a> <a href="#">7351</a>                                                               |
| <a href="#">7661</a>  | <a href="#">891.5046</a>  | <a href="#">1780.9947</a> | <a href="#">1778.9665</a> | <a href="#">2.0282</a>  | <a href="#">2</a> | <a href="#">0</a>    | <a href="#">1.2e+02</a> | <a href="#">3</a>  | <a href="#">K.LTSEEKEYEGKLLK.T</a> <a href="#">7654</a>                                                                                                                               |
| <a href="#">7724</a>  | <a href="#">893.7286</a>  | <a href="#">1785.4427</a> | <a href="#">1784.8734</a> | <a href="#">0.5694</a>  | <a href="#">0</a> | <a href="#">85</a>   | <a href="#">5e-07</a>   | <a href="#">1</a>  | <a href="#">K.AYLPVNESFGFTGDLR.A</a> <a href="#">7712</a> <a href="#">7713</a> <a href="#">7723</a> <a href="#">7725</a> <a href="#">7727</a> <a href="#">7730</a> <a href="#">77</a> |
| <a href="#">8526</a>  | <a href="#">624.3235</a>  | <a href="#">1869.9487</a> | <a href="#">1869.8316</a> | <a href="#">0.1172</a>  | <a href="#">1</a> | <a href="#">4</a>    | <a href="#">55</a>      | <a href="#">9</a>  | <a href="#">R.ARLMADDYGWDVTDAR.K</a> <a href="#">8523</a>                                                                                                                             |
| <a href="#">10188</a> | <a href="#">1030.3351</a> | <a href="#">2058.6557</a> | <a href="#">2058.0534</a> | <a href="#">0.6023</a>  | <a href="#">0</a> | <a href="#">76</a>   | <a href="#">3.6e-06</a> | <a href="#">1</a>  | <a href="#">R.GHVYAEEQRPGTPIYTIK.A</a> <a href="#">10178</a> <a href="#">10185</a> <a href="#">10211</a>                                                                              |
| <a href="#">10336</a> | <a href="#">1039.3371</a> | <a href="#">2076.6597</a> | <a href="#">2076.0528</a> | <a href="#">0.6069</a>  | <a href="#">0</a> | <a href="#">100</a>  | <a href="#">1.2e-08</a> | <a href="#">1</a>  | <a href="#">K.IWTFGPDTTGANLLVDQTK.A</a> <a href="#">10343</a>                                                                                                                         |
| <a href="#">10574</a> | <a href="#">703.6252</a>  | <a href="#">2107.8537</a> | <a href="#">2108.0282</a> | <a href="#">-0.1745</a> | <a href="#">2</a> | <a href="#">1</a>    | <a href="#">1.1e+02</a> | <a href="#">5</a>  | <a href="#">K.DCKAGSKEDPAPLMLYVSK.M</a>                                                                                                                                               |
| <a href="#">10705</a> | <a href="#">710.3099</a>  | <a href="#">2127.9077</a> | <a href="#">2126.9803</a> | <a href="#">0.9274</a>  | <a href="#">2</a> | <a href="#">2</a>    | <a href="#">88</a>      | <a href="#">3</a>  | <a href="#">K.TRARLMADDYGWDVTDAR.K</a>                                                                                                                                                |
| <a href="#">10753</a> | <a href="#">1069.0151</a> | <a href="#">2136.0157</a> | <a href="#">2136.0483</a> | <a href="#">-0.0325</a> | <a href="#">1</a> | <a href="#">0</a>    | <a href="#">1.2e+02</a> | <a href="#">1</a>  | <a href="#">K.EDPAPLMLYVSKMVPTSDK.G</a>                                                                                                                                               |
| <a href="#">11286</a> | <a href="#">1103.8516</a> | <a href="#">2205.6887</a> | <a href="#">2205.0874</a> | <a href="#">0.6013</a>  | <a href="#">0</a> | <a href="#">106</a>  | <a href="#">3.7e-09</a> | <a href="#">1</a>  | <a href="#">R.LYVTAEPPIEECALAIEAGK.I</a> <a href="#">11288</a> <a href="#">11290</a> <a href="#">11291</a> <a href="#">11292</a> <a href="#">112</a>                                  |
| <a href="#">11287</a> | <a href="#">1103.8716</a> | <a href="#">2205.7287</a> | <a href="#">2204.1478</a> | <a href="#">1.5810</a>  | <a href="#">1</a> | <a href="#">102</a>  | <a href="#">9e-09</a>   | <a href="#">1</a>  | <a href="#">R.KIWTFGPDTTGANLLVDQTK.A</a> <a href="#">11280</a> <a href="#">11283</a> <a href="#">11289</a>                                                                            |
| <a href="#">12104</a> | <a href="#">774.4039</a>  | <a href="#">2320.1897</a> | <a href="#">2318.2416</a> | <a href="#">1.9481</a>  | <a href="#">2</a> | <a href="#">4</a>    | <a href="#">46</a>      | <a href="#">1</a>  | <a href="#">M.VNFTIEEIRSLMDKPKNIR.N</a>                                                                                                                                               |
| <a href="#">12673</a> | <a href="#">1206.4541</a> | <a href="#">2410.8937</a> | <a href="#">2410.2281</a> | <a href="#">0.6656</a>  | <a href="#">1</a> | <a href="#">97</a>   | <a href="#">2.4e-08</a> | <a href="#">1</a>  | <a href="#">K.AVQYLNEIKDSVVSQFQWATR.E</a> <a href="#">12663</a> <a href="#">12674</a> <a href="#">12676</a> <a href="#">12678</a> <a href="#">12</a>                                  |
| <a href="#">12917</a> | <a href="#">814.9439</a>  | <a href="#">2441.8097</a> | <a href="#">2443.2264</a> | <a href="#">-1.4167</a> | <a href="#">2</a> | <a href="#">0</a>    | <a href="#">1.1e+02</a> | <a href="#">4</a>  | <a href="#">K.ISDPVVSYSRESVSGKSSMTALSK.S</a>                                                                                                                                          |
| <a href="#">12963</a> | <a href="#">817.7882</a>  | <a href="#">2450.3427</a> | <a href="#">2449.2821</a> | <a href="#">1.0606</a>  | <a href="#">2</a> | <a href="#">1</a>    | <a href="#">95</a>      | <a href="#">5</a>  | <a href="#">-.MVNFTIEEIRSLMDKPKNIR.N</a>                                                                                                                                              |
| <a href="#">13433</a> | <a href="#">1256.2961</a> | <a href="#">2510.5777</a> | <a href="#">2509.4124</a> | <a href="#">1.1654</a>  | <a href="#">2</a> | <a href="#">3</a>    | <a href="#">55</a>      | <a href="#">5</a>  | <a href="#">R.IKPVLIINKIDRSMEQQLPK.E</a> <a href="#">13421</a> <a href="#">13426</a>                                                                                                  |
| <a href="#">13577</a> | <a href="#">843.6995</a>  | <a href="#">2528.0767</a> | <a href="#">2525.4073</a> | <a href="#">2.6694</a>  | <a href="#">2</a> | <a href="#">(2)</a>  | <a href="#">81</a>      | <a href="#">3</a>  | <a href="#">R.IKPVLIINKIDRSMEQQLPK.E</a> <a href="#">13578</a>                                                                                                                        |
| <a href="#">13854</a> | <a href="#">1287.1696</a> | <a href="#">2572.3247</a> | <a href="#">2571.3255</a> | <a href="#">0.9993</a>  | <a href="#">0</a> | <a href="#">55</a>   | <a href="#">0.0004</a>  | <a href="#">1</a>  | <a href="#">K.TEAIDDVPCGNIVGLVGVDFLLK.S</a> <a href="#">13847</a> <a href="#">13851</a>                                                                                               |
| <a href="#">14251</a> | <a href="#">885.6075</a>  | <a href="#">2653.8007</a> | <a href="#">2652.3477</a> | <a href="#">1.4530</a>  | <a href="#">0</a> | <a href="#">76</a>   | <a href="#">3e-06</a>   | <a href="#">1</a>  | <a href="#">K.FLPAADAMLEMICIHLPSPVTAQK.Y</a> <a href="#">14244</a>                                                                                                                    |
| <a href="#">14503</a> | <a href="#">896.7875</a>  | <a href="#">2687.3407</a> | <a href="#">2684.4511</a> | <a href="#">2.8897</a>  | <a href="#">1</a> | <a href="#">2</a>    | <a href="#">67</a>      | <a href="#">7</a>  | <a href="#">R.FNILDVTLHADAIHRGGQIIPAR.R</a>                                                                                                                                           |
| <a href="#">14911</a> | <a href="#">927.9909</a>  | <a href="#">2780.9507</a> | <a href="#">2780.4427</a> | <a href="#">0.5080</a>  | <a href="#">1</a> | <a href="#">18</a>   | <a href="#">1.9</a>     | <a href="#">1</a>  | <a href="#">R.KFLPAADAMLEMICIHLPSPVTAQK.Y</a>                                                                                                                                         |
| <a href="#">15743</a> | <a href="#">1039.5429</a> | <a href="#">3115.6067</a> | <a href="#">3115.6021</a> | <a href="#">0.0047</a>  | <a href="#">2</a> | <a href="#">0</a>    | <a href="#">97</a>      | <a href="#">7</a>  | <a href="#">R.KFLPAADAMLEMICIHLPSPVTAQKYR.A</a>                                                                                                                                       |

6. [gi|220698646|gb|EED54986.1|](#) Mass: 69834 Score: 1546 Queries matched: 94 emPAI: 2.30

molecular chaperone Hsp70 [Aspergillus flavus NRRL3357]

| Query                | Observed                  | Mr(expt)                  | Mr(calc)                  | Delta                   | Miss              | Score              | Expect                 | Rank              | Peptide                                          |
|----------------------|---------------------------|---------------------------|---------------------------|-------------------------|-------------------|--------------------|------------------------|-------------------|--------------------------------------------------|
| <a href="#">741</a>  | <a href="#">485.6646</a>  | <a href="#">969.3147</a>  | <a href="#">968.4967</a>  | <a href="#">0.8180</a>  | <a href="#">0</a> | <a href="#">48</a> | <a href="#">0.0022</a> | <a href="#">1</a> | <a href="#">R.LVSDFFNK.E</a> <a href="#">740</a> |
| <a href="#">1374</a> | <a href="#">552.1451</a>  | <a href="#">1102.2757</a> | <a href="#">1103.5869</a> | <a href="#">-1.3112</a> | <a href="#">2</a> | <a href="#">4</a>  | <a href="#">80</a>     | <a href="#">3</a> | <a href="#">R.LRTACERAK.R</a>                    |
| <a href="#">1538</a> | <a href="#">1130.4010</a> | <a href="#">1129.3937</a> | <a href="#">1129.6203</a> | <a href="#">-0.2266</a> | <a href="#">1</a> | <a href="#">6</a>  | <a href="#">51</a>     | <a href="#">4</a> | <a href="#">K.DLTTNARALR.R</a>                   |

|                       |           |           |           |         |   |      |         |    |                                                                                                                                                      |
|-----------------------|-----------|-----------|-----------|---------|---|------|---------|----|------------------------------------------------------------------------------------------------------------------------------------------------------|
| <a href="#">1591</a>  | 568.7021  | 1135.3897 | 1134.5768 | 0.8129  | 1 | 21   | 1.2     | 1  | K.LTISDSKKEK.V                                                                                                                                       |
| <a href="#">1887</a>  | 599.6811  | 1197.3477 | 1196.6553 | 0.6924  | 0 | 42   | 0.011   | 1  | K.FELTGIPPAPR.G <a href="#">1880</a> <a href="#">1891</a> <a href="#">1893</a>                                                                       |
| <a href="#">1956</a>  | 606.7396  | 1211.4647 | 1210.7034 | 0.7614  | 0 | 86   | 3.7e-07 | 1  | K.DAGLIAGLNVLR.I <a href="#">1945</a> <a href="#">1948</a> <a href="#">1952</a> <a href="#">1960</a>                                                 |
| <a href="#">1982</a>  | 608.7861  | 1215.5577 | 1214.7023 | 0.8554  | 0 | 36   | 0.041   | 1  | K.GGKPIIQVEFK.G <a href="#">1989</a>                                                                                                                 |
| <a href="#">2166</a>  | 623.7521  | 1245.4897 | 1243.6084 | 1.8813  | 0 | 35   | 0.059   | 1  | K.NGLESYAYSLK.N                                                                                                                                      |
| <a href="#">2168</a>  | 624.0471  | 1246.0797 | 1245.6506 | 0.4291  | 0 | 42   | 0.011   | 1  | R.LVNHFVNEFK.R <a href="#">2185</a> <a href="#">2188</a> <a href="#">2197</a>                                                                        |
| <a href="#">2273</a>  | 630.1846  | 1258.3547 | 1257.7153 | 0.6394  | 2 | 8    | 25      | 1  | K.KDLTTNARALR.R <a href="#">2278</a>                                                                                                                 |
| <a href="#">3055</a>  | 672.7771  | 1343.5397 | 1344.7725 | -1.2328 | 2 | 0    | 1.6e+02 | 3  | K.ITITNDKGRLSK.E                                                                                                                                     |
| <a href="#">3175</a>  | 679.1996  | 1356.3847 | 1355.6180 | 0.7667  | 0 | 61   | 0.00011 | 1  | R.FEELCQDLFR.G <a href="#">3174</a> <a href="#">3188</a> <a href="#">3194</a>                                                                        |
| <a href="#">3630</a>  | 468.7292  | 1403.1657 | 1401.7517 | 1.4140  | 1 | 32   | 0.093   | 1  | R.LVNHFVNEFKR.K <a href="#">3633</a> <a href="#">3638</a>                                                                                            |
| <a href="#">3870</a>  | 478.6799  | 1433.0177 | 1432.6867 | 0.3310  | 1 | 8    | 24      | 9  | K.EEIERMLADA EK.Y                                                                                                                                    |
| <a href="#">3903</a>  | 719.5571  | 1437.0997 | 1436.7300 | 0.3698  | 1 | 47   | 0.0032  | 1  | R.LVSDFFNKEPNK.S <a href="#">3911</a> <a href="#">3919</a> <a href="#">3924</a>                                                                      |
| <a href="#">3941</a>  | 721.5541  | 1441.0937 | 1439.7733 | 1.3205  | 0 | 30   | 0.17    | 2  | K.SSVHEIVLVGGSTR.I <a href="#">3940</a>                                                                                                              |
| <a href="#">4206</a>  | 737.1881  | 1472.3617 | 1470.6991 | 1.6626  | 0 | 81   | 1.2e-06 | 1  | R.TTPSFVAFDTER.L <a href="#">4207</a>                                                                                                                |
| <a href="#">4471</a>  | 752.3866  | 1502.7587 | 1502.6624 | 0.0963  | 0 | 48   | 0.0029  | 1  | R.TADEVEEKPEELD.-                                                                                                                                    |
| <a href="#">5274</a>  | 792.6871  | 1583.3597 | 1582.7562 | 0.6035  | 1 | 52   | 0.00098 | 1  | R.ARFEELCQDLFR.G <a href="#">5259</a> <a href="#">5295</a>                                                                                           |
| <a href="#">5397</a>  | 798.4086  | 1594.8027 | 1594.7913 | 0.0115  | 0 | 76   | 3.7e-06 | 1  | K.QFTPEEVSSMVLTK.M <a href="#">5404</a> <a href="#">5423</a>                                                                                         |
| <a href="#">5630</a>  | 807.1846  | 1612.3547 | 1610.7862 | 1.5685  | 0 | (18) | 2.2     | 1  | K.QFTPEEVSSMVLTK.M                                                                                                                                   |
| <a href="#">5810</a>  | 814.5691  | 1627.1237 | 1627.7914 | -0.6677 | 1 | 33   | 0.083   | 1  | R.DDRIEIIANDQGNR.T <a href="#">5836</a>                                                                                                              |
| <a href="#">5978</a>  | 821.8231  | 1641.6317 | 1638.9417 | 2.6900  | 1 | 3    | 80      | 10 | R.QATKDAGLIAGLNVLR.I                                                                                                                                 |
| <a href="#">6229</a>  | 830.7866  | 1659.5587 | 1658.8879 | 0.6708  | 0 | 89   | 2.1e-07 | 1  | R.IINEPTAAAIA YGLDK.K <a href="#">6247</a>                                                                                                           |
| <a href="#">6452</a>  | 559.4279  | 1675.2617 | 1674.7234 | 0.5383  | 0 | 62   | 9.8e-05 | 1  | K.ATAGDTHLGGEDFDNR.L <a href="#">6451</a> <a href="#">6453</a> <a href="#">6463</a>                                                                  |
| <a href="#">6603</a>  | 843.6996  | 1685.3847 | 1684.7991 | 0.5856  | 0 | 85   | 4.6e-07 | 1  | K.NQVAMNPHNTVFD AK.R <a href="#">6600</a> <a href="#">6601</a> <a href="#">6604</a>                                                                  |
| <a href="#">6818</a>  | 851.7491  | 1701.4837 | 1700.7941 | 0.6897  | 0 | (63) | 7.7e-05 | 1  | K.NQVAMNPHNTVFD AK.R <a href="#">6839</a>                                                                                                            |
| <a href="#">7247</a>  | 871.7286  | 1741.4427 | 1739.8399 | 1.6028  | 2 | 1    | 1.1e+02 | 1  | K.EEIERMLADA EK.Y.A                                                                                                                                  |
| <a href="#">7741</a>  | 894.6246  | 1787.2347 | 1786.9828 | 0.2519  | 1 | 104  | 5.7e-09 | 1  | R.IINEPTAAAIA YGLDKK.A <a href="#">7737</a> <a href="#">7749</a> <a href="#">7757</a>                                                                |
| <a href="#">8788</a>  | 633.6059  | 1897.7957 | 1897.9278 | -0.1320 | 1 | 7    | 29      | 1  | K.QFTPEEVSSMVLTKMR.E                                                                                                                                 |
| <a href="#">9498</a>  | 992.7851  | 1983.5557 | 1981.9932 | 1.5625  | 0 | 54   | 0.00059 | 1  | M.APAVGIDLGTYS CVGVFR.D <a href="#">9481</a> <a href="#">9486</a> <a href="#">9487</a> <a href="#">9488</a> <a href="#">9490</a> <a href="#">949</a> |
| <a href="#">9855</a>  | 676.3869  | 2026.1387 | 2025.9313 | 0.2075  | 2 | 3    | 60      | 6  | R.MLADA EK YKA EDAEASR.I                                                                                                                             |
| <a href="#">11294</a> | 736.6852  | 2207.0337 | 2204.1325 | 2.9012  | 1 | 1    | 98      | 5  | K.VTSKVDEIIGWLD SNQTATK.E                                                                                                                            |
| <a href="#">13513</a> | 1261.8241 | 2521.6337 | 2520.2343 | 1.3994  | 0 | 129  | 1.5e-11 | 1  | K.SINPDEAVAYGAAVQAAILSGDSSSK.S <a href="#">13508</a> <a href="#">13509</a> <a href="#">13514</a> <a href="#">13</a>                                  |
| <a href="#">15256</a> | 968.2662  | 2901.7767 | 2899.3988 | 2.3779  | 0 | 10   | 9.3     | 1  | R.ETA EAYLGGTVNNAVITVPAYFNDSQR.Q                                                                                                                     |
| <a href="#">15519</a> | 1519.0341 | 3036.0537 | 3034.5108 | 1.5429  | 0 | 103  | 4.6e-09 | 1  | K.ELEGVANPIISAAYGGAAGAAPGGAPGAPGGSTR.T                                                                                                               |

7. [gi|220696438|gb|EED52780.1|](#) Mass: 61176 Score: 1334 Queries matched: 58 emPAI: 2.34

glucose-6-phosphate isomerase [Aspergillus flavus NRRL3357]

| Query               | Observed | Mr(expt) | Mr(calc) | Delta  | Miss | Score | Expect | Rank | Peptide      |
|---------------------|----------|----------|----------|--------|------|-------|--------|------|--------------|
| <a href="#">83</a>  | 702.3110 | 701.3037 | 700.3755 | 0.9282 | 0    | 10    | 24     | 2    | K.TPEQVK.T   |
| <a href="#">482</a> | 447.9891 | 893.9637 | 893.4243 | 0.5394 | 0    | 15    | 5.2    | 1    | K.EFSEQVR.S  |
| <a href="#">686</a> | 480.4156 | 958.8167 | 958.4719 | 0.3448 | 0    | 28    | 0.29   | 1    | K.EANVEELR.D |

|                       |           |           |           |         |   |      |         |    |                                                                                                                                                                      |
|-----------------------|-----------|-----------|-----------|---------|---|------|---------|----|----------------------------------------------------------------------------------------------------------------------------------------------------------------------|
| <a href="#">1992</a>  | 609.5841  | 1217.1537 | 1216.5473 | 0.6065  | 0 | 51   | 0.0013  | 1  | K.GEHINFTEDR.A <a href="#">1987</a>                                                                                                                                  |
| <a href="#">2460</a>  | 639.4591  | 1276.9037 | 1276.6412 | 0.2626  | 0 | 52   | 0.0012  | 1  | K.TEGAPDNLVPHK.T <a href="#">2461</a> <a href="#">2467</a>                                                                                                           |
| <a href="#">3487</a>  | 694.7091  | 1387.4037 | 1385.6187 | 1.7851  | 0 | 59   | 0.00023 | 1  | K.NMFGFESWVGGR.Y <a href="#">3477</a>                                                                                                                                |
| <a href="#">3616</a>  | 701.5911  | 1401.1677 | 1401.6136 | -0.4459 | 0 | (19) | 2.1     | 2  | K.NMFGFESWVGGR.Y                                                                                                                                                     |
| <a href="#">3755</a>  | 711.5751  | 1421.1357 | 1420.6987 | 0.4371  | 0 | 89   | 2.1e-07 | 1  | M.PAFSQATDLSAWK.E <a href="#">3762</a>                                                                                                                               |
| <a href="#">4504</a>  | 754.2666  | 1506.5187 | 1505.8341 | 0.6846  | 0 | 64   | 6.7e-05 | 1  | K.NFLTEETLSLLVK.L <a href="#">4493</a> <a href="#">4496</a> <a href="#">4503</a> <a href="#">4506</a> <a href="#">4508</a> <a href="#">4511</a> <a href="#">4515</a> |
| <a href="#">4772</a>  | 768.8941  | 1535.7737 | 1534.7879 | 0.9859  | 0 | 69   | 1.8e-05 | 1  | K.DSNPETTLFLIASK.T <a href="#">4769</a> <a href="#">4779</a>                                                                                                         |
| <a href="#">4895</a>  | 773.8121  | 1545.6097 | 1544.7835 | 0.8263  | 0 | 55   | 0.00048 | 1  | K.HFVALSTNEAEVTK.F <a href="#">4880</a> <a href="#">4887</a>                                                                                                         |
| <a href="#">5006</a>  | 779.6391  | 1557.2637 | 1556.7318 | 0.5319  | 0 | 71   | 1.2e-05 | 1  | K.TFTTAETTTNANSK.K                                                                                                                                                   |
| <a href="#">5291</a>  | 793.6671  | 1585.3197 | 1584.7818 | 0.5380  | 0 | 96   | 3.9e-08 | 1  | K.SVVEDVNSVLEHMK.E <a href="#">5290</a> <a href="#">5294</a> <a href="#">5300</a>                                                                                    |
| <a href="#">5651</a>  | 808.2831  | 1614.5517 | 1613.7573 | 0.7944  | 0 | 96   | 4e-08   | 1  | K.NTVDNSDILFDFSK.N <a href="#">5664</a>                                                                                                                              |
| <a href="#">6061</a>  | 824.3266  | 1646.6387 | 1645.9151 | 0.7236  | 0 | 51   | 0.0012  | 1  | K.TFLGNRPPTSILAQK.I <a href="#">6049</a> <a href="#">6057</a>                                                                                                        |
| <a href="#">6963</a>  | 857.6981  | 1713.3817 | 1711.8239 | 1.5578  | 0 | 27   | 0.27    | 1  | R.FPAYLQQLSMESNGK.A <a href="#">6965</a>                                                                                                                             |
| <a href="#">7962</a>  | 905.7866  | 1809.5587 | 1808.9164 | 0.6423  | 0 | 115  | 4.9e-10 | 1  | R.MLASNFLAQSEALMVGK.T <a href="#">7958</a> <a href="#">7963</a> <a href="#">7965</a> <a href="#">7989</a>                                                            |
| <a href="#">8125</a>  | 609.5842  | 1825.7307 | 1824.8101 | 0.9206  | 1 | 25   | 0.48    | 1  | R.DAMFKGEHINFTEDR.A                                                                                                                                                  |
| <a href="#">8140</a>  | 914.2486  | 1826.4827 | 1824.9114 | 1.5714  | 0 | (62) | 7.9e-05 | 1  | R.MLASNFLAQSEALMVGK.T                                                                                                                                                |
| <a href="#">8254</a>  | 921.9626  | 1841.9107 | 1840.9063 | 1.0044  | 0 | (16) | 4       | 2  | R.MLASNFLAQSEALMVGK.T                                                                                                                                                |
| <a href="#">8475</a>  | 622.2932  | 1863.8577 | 1863.9843 | -0.1266 | 0 | 14   | 5.2     | 1  | K.LHFVSNIDGTHIAEALK.D                                                                                                                                                |
| <a href="#">10588</a> | 1056.3176 | 2110.6207 | 2111.0357 | -0.4150 | 0 | 68   | 2.3e-05 | 1  | K.LIPSDFIMAAESHNPVEGGK.H <a href="#">10598</a> <a href="#">10603</a> <a href="#">10608</a>                                                                           |
| <a href="#">11655</a> | 754.5402  | 2260.5987 | 2262.1249 | -1.5262 | 1 | 3    | 67      | 10 | K.HQRMLASNFLAQSEALMVGK.T                                                                                                                                             |
| <a href="#">13787</a> | 853.9669  | 2558.8787 | 2558.2612 | 0.6175  | 0 | 31   | 0.11    | 1  | K.IQQELETSGAGAGHDASTSGLLAQK.Q                                                                                                                                        |
| <a href="#">14502</a> | 896.7679  | 2687.2817 | 2686.3562 | 0.9255  | 1 | 78   | 1.8e-06 | 1  | K.KIQELETSGAGAGHDASTSGLLAQK.Q                                                                                                                                        |
| <a href="#">15720</a> | 1034.8882 | 3101.6427 | 3102.5563 | -0.9136 | 0 | 52   | 0.00058 | 1  | K.YTTGPILFGPATNAQHSFFQLLHQGTK.L <a href="#">15722</a> <a href="#">15728</a>                                                                                          |

8. [gi|220692818|gb|EED49164.1|](#) Mass: 27024 Score: 1226 Queries matched: 49 emPAI: 5.46

14-3-3 family protein ArtA, putative [Aspergillus flavus NRRL3357]

| Query                | Observed | Mr(expt)  | Mr(calc)  | Delta   | Miss | Score | Expect  | Rank | Peptide                                                                                                                                                               |
|----------------------|----------|-----------|-----------|---------|------|-------|---------|------|-----------------------------------------------------------------------------------------------------------------------------------------------------------------------|
| <a href="#">214</a>  | 789.4630 | 788.4557  | 788.4279  | 0.0278  | 0    | 7     | 44      | 6    | K.IESELAK.I                                                                                                                                                           |
| <a href="#">523</a>  | 454.5191 | 907.0237  | 906.5174  | 0.5063  | 0    | 8     | 25      | 6    | R.NLLSVAYK.N                                                                                                                                                          |
| <a href="#">575</a>  | 917.6150 | 916.6077  | 916.5229  | 0.0848  | 0    | 44    | 0.0087  | 1    | R.IVTSIEQK.E <a href="#">576</a>                                                                                                                                      |
| <a href="#">1299</a> | 544.8626 | 1087.7107 | 1087.5873 | 0.1234  | 0    | 64    | 7e-05   | 1    | K.GNESQVTLIK.E <a href="#">1298</a> <a href="#">1301</a> <a href="#">1302</a>                                                                                         |
| <a href="#">1348</a> | 549.2626 | 1096.5107 | 1094.5244 | 1.9864  | 0    | 38    | 0.026   | 1    | K.GAADASLEAYK.A                                                                                                                                                       |
| <a href="#">1372</a> | 551.9041 | 1101.7937 | 1101.5455 | 0.2483  | 0    | 50    | 0.002   | 1    | M.GHEDAVYLAK.L <a href="#">1371</a> <a href="#">1373</a>                                                                                                              |
| <a href="#">1677</a> | 577.7566 | 1153.4987 | 1153.5768 | -0.0780 | 0    | 38    | 0.025   | 1    | R.YLAEFAIGDR.R                                                                                                                                                        |
| <a href="#">1850</a> | 595.6851 | 1189.3557 | 1188.6536 | 0.7021  | 0    | 56    | 0.00042 | 1    | K.DSTLIMQLLR.D <a href="#">1844</a> <a href="#">1851</a>                                                                                                              |
| <a href="#">2229</a> | 627.2591 | 1252.5037 | 1252.6411 | -0.1374 | 0    | 86    | 3.6e-07 | 1    | K.HLIPSAQSGESK.V <a href="#">2230</a>                                                                                                                                 |
| <a href="#">2512</a> | 642.7016 | 1283.3887 | 1284.7163 | -1.3276 | 2    | 11    | 13      | 1    | K.NVIGARRASWR.I <a href="#">2503</a> <a href="#">2521</a>                                                                                                             |
| <a href="#">2947</a> | 667.1666 | 1332.3187 | 1331.6643 | 0.6545  | 0    | 66    | 4.2e-05 | 1    | K.ICDDILEVLDK.H <a href="#">2948</a> <a href="#">2967</a> <a href="#">2968</a>                                                                                        |
| <a href="#">3516</a> | 696.1961 | 1390.3777 | 1389.7351 | 0.6426  | 1    | 57    | 0.00035 | 1    | R.IVTSIEQKESK.G                                                                                                                                                       |
| <a href="#">4572</a> | 759.2771 | 1516.5397 | 1515.7780 | 0.7617  | 0    | 100   | 1.5e-08 | 1    | K.VVASADVELTVEER.N <a href="#">4557</a> <a href="#">4561</a> <a href="#">4563</a> <a href="#">4569</a> <a href="#">4570</a> <a href="#">4574</a> <a href="#">4575</a> |

[7785](#) 597.9672 1790.8797 1789.9323 0.9475 0 72 8.3e-06 1 [K.AATEVAQTDLAPTHPIR.L](#) [7765](#) [7786](#) [7788](#) [7789](#)  
[10723](#) 1066.2416 2130.4687 2129.0052 1.4636 0 84 5.3e-07 1 [K.LAFDDAIAELDTLSEESYK.D](#) [10724](#) [10732](#) [10736](#)

9. [gi|220699320|gb|EED55659.1|](#) Mass: 38287 Score: 1185 Queries matched: 89 emPAI: 3.09

alcohol dehydrogenase, zinc-containing, putative [Aspergillus flavus NRRL3357]

| Query                 | Observed  | Mr(expt)  | Mr(calc)  | Delta   | Miss | Score | Expect  | Rank | Peptide                                                                                                                                                                               |
|-----------------------|-----------|-----------|-----------|---------|------|-------|---------|------|---------------------------------------------------------------------------------------------------------------------------------------------------------------------------------------|
| <a href="#">162</a>   | 757.6070  | 756.5997  | 756.4858  | 0.1140  | 1    | 12    | 11      | 9    | <a href="#">K.VKGIVNK.V</a>                                                                                                                                                           |
| <a href="#">227</a>   | 793.4020  | 792.3947  | 792.3766  | 0.0181  | 0    | 14    | 7       | 2    | <a href="#">K.GFEVGER.V</a> <a href="#">226</a>                                                                                                                                       |
| <a href="#">798</a>   | 982.6490  | 981.6417  | 981.5859  | 0.0558  | 0    | 44    | 0.0059  | 1    | <a href="#">R.VVVAPEGLK.M</a> <a href="#">797</a> <a href="#">800</a> <a href="#">804</a>                                                                                             |
| <a href="#">1096</a>  | 525.5421  | 1049.0697 | 1048.4825 | 0.5872  | 0    | 39    | 0.021   | 1    | <a href="#">R.QDPSAQFEK.L</a> <a href="#">1093</a>                                                                                                                                    |
| <a href="#">1210</a>  | 536.5266  | 1071.0387 | 1070.6084 | 0.4303  | 1    | 24    | 0.69    | 1    | <a href="#">K.LRDNDVLVK.V</a> <a href="#">1209</a>                                                                                                                                    |
| <a href="#">1228</a>  | 538.0931  | 1074.1717 | 1073.6233 | 0.5484  | 0    | 21    | 1.4     | 1    | <a href="#">K.HAVVDVPLPK.L</a> <a href="#">1221</a>                                                                                                                                   |
| <a href="#">2011</a>  | 611.5391  | 1221.0637 | 1220.6401 | 0.4236  | 0    | 67    | 3.2e-05 | 1    | <a href="#">K.ILEDSEYVVR.R</a> <a href="#">2013</a> <a href="#">2014</a>                                                                                                              |
| <a href="#">2569</a>  | 645.8406  | 1289.6667 | 1289.6615 | 0.0052  | 1    | 9     | 21      | 1    | <a href="#">R.QDPSAQFEK.K</a>                                                                                                                                                         |
| <a href="#">2583</a>  | 646.5996  | 1291.1847 | 1290.6788 | 0.5059  | 1    | 4     | 69      | 7    | <a href="#">-MSLPQTMKALR.Y</a>                                                                                                                                                        |
| <a href="#">2641</a>  | 649.7531  | 1297.4917 | 1295.6398 | 1.8520  | 0    | 59    | 0.00018 | 1    | <a href="#">K.FPAAIDYLDSEK.V</a> <a href="#">2610</a> <a href="#">2613</a> <a href="#">2616</a> <a href="#">2617</a> <a href="#">2646</a>                                             |
| <a href="#">3558</a>  | 698.3736  | 1394.7327 | 1395.7146 | -0.9819 | 0    | 7     | 29      | 2    | <a href="#">K.LVVYGVYNNEAR.V</a>                                                                                                                                                      |
| <a href="#">3671</a>  | 705.7686  | 1409.5227 | 1408.6834 | 0.8393  | 0    | 69    | 1.9e-05 | 1    | <a href="#">K.SLEAGDEYVALSR.Q</a> <a href="#">3663</a> <a href="#">3678</a>                                                                                                           |
| <a href="#">5582</a>  | 805.7571  | 1609.4997 | 1608.6912 | 0.8085  | 0    | 88    | 2.3e-07 | 1    | <a href="#">K.LEEWEQCLES.MR.N</a> <a href="#">5576</a>                                                                                                                                |
| <a href="#">5797</a>  | 813.7386  | 1625.4627 | 1624.6861 | 0.7766  | 0    | (11)  | 13      | 2    | <a href="#">K.LEEWEQCLES.MR.N</a>                                                                                                                                                     |
| <a href="#">6817</a>  | 851.7386  | 1701.4627 | 1699.8498 | 1.6129  | 1    | 2     | 83      | 6    | <a href="#">R.QCGGCRVVVAPEGLK.M</a>                                                                                                                                                   |
| <a href="#">8135</a>  | 914.1691  | 1826.3237 | 1823.8942 | 2.4296  | 0    | 54    | 0.00054 | 1    | <a href="#">K.ENPYGFDIVVEATGSVK.I</a> <a href="#">8106</a> <a href="#">8109</a> <a href="#">8115</a> <a href="#">8118</a> <a href="#">8121</a> <a href="#">8122</a> <a href="#">8</a> |
| <a href="#">8570</a>  | 626.0502  | 1875.1287 | 1873.0462 | 2.0825  | 0    | 62    | 9.3e-05 | 1    | <a href="#">K.FPLVPGHETVGVVAAGPK.V</a> <a href="#">8544</a> <a href="#">8554</a> <a href="#">8556</a> <a href="#">8561</a> <a href="#">8562</a> <a href="#">856</a>                   |
| <a href="#">8986</a>  | 639.8092  | 1916.4057 | 1917.9982 | -1.5925 | 2    | 4     | 52      | 3    | <a href="#">M.SLPQTMKALRYEQPEK.H</a>                                                                                                                                                  |
| <a href="#">9021</a>  | 961.3581  | 1920.7017 | 1918.9564 | 1.7453  | 0    | 41    | 0.012   | 1    | <a href="#">K.IFGDEITILGSFSETYK.F</a> <a href="#">9000</a> <a href="#">9005</a> <a href="#">9013</a> <a href="#">9019</a> <a href="#">9025</a>                                        |
| <a href="#">9445</a>  | 989.6771  | 1977.3397 | 1977.8019 | -0.4622 | 0    | 75    | 4e-06   | 1    | <a href="#">R.VVADNSELGCEFCYCR.R</a> <a href="#">9465</a> <a href="#">9470</a>                                                                                                        |
| <a href="#">9511</a>  | 662.7922  | 1985.3547 | 1982.9230 | 2.4317  | 1    | 49    | 0.0016  | 1    | <a href="#">K.VFKLEEWEQCLES.MR.N</a> <a href="#">9505</a> <a href="#">9512</a>                                                                                                        |
| <a href="#">10617</a> | 705.8285  | 2114.4637 | 2111.9881 | 2.4756  | 0    | 18    | 2.1     | 1    | <a href="#">K.ACGVCGTDLHIHEGQFIK.F</a>                                                                                                                                                |
| <a href="#">11367</a> | 739.2635  | 2214.7687 | 2213.2606 | 1.5081  | 0    | (3)   | 69      | 6    | <a href="#">K.MGSSVLLFGAGPTGLILAQLLR.Q</a>                                                                                                                                            |
| <a href="#">11465</a> | 1116.0396 | 2230.0647 | 2229.2555 | 0.8092  | 0    | 97    | 2.3e-08 | 1    | <a href="#">K.MGSSVLLFGAGPTGLILAQLLR.Q</a> <a href="#">11458</a> <a href="#">11467</a> <a href="#">11472</a> <a href="#">11475</a>                                                    |
| <a href="#">11911</a> | 1149.4116 | 2296.8087 | 2296.1005 | 0.7082  | 0    | 84    | 4.8e-07 | 1    | <a href="#">K.NLSDVDATLLEPASCAGLDK.I</a> <a href="#">11906</a> <a href="#">11910</a> <a href="#">11915</a> <a href="#">11926</a>                                                      |
| <a href="#">15811</a> | 1052.2529 | 3153.7367 | 3154.6186 | -0.8819 | 2    | 2     | 62      | 6    | <a href="#">K.KENPYGFDIVVEATGSVKILEDSINVR.R</a>                                                                                                                                       |

10. [gi|220697529|gb|EED53870.1|](#) Mass: 87338 Score: 1172 Queries matched: 118 emPAI: 1.61

cobalamin-independent methionine synthase Meth/D [Aspergillus flavus NRRL3357]

| Query               | Observed | Mr(expt) | Mr(calc) | Delta  | Miss | Score | Expect | Rank | Peptide                                         |
|---------------------|----------|----------|----------|--------|------|-------|--------|------|-------------------------------------------------|
| <a href="#">47</a>  | 676.4920 | 675.4847 | 675.3704 | 0.1143 | 0    | 16    | 6.4    | 1    | <a href="#">K.SAFPVR.L</a> <a href="#">46</a>   |
| <a href="#">59</a>  | 684.5530 | 683.5457 | 683.3966 | 0.1491 | 0    | 18    | 1.9    | 1    | <a href="#">R.EGLPLR.S</a> <a href="#">58</a>   |
| <a href="#">176</a> | 767.5170 | 766.5097 | 766.4225 | 0.0872 | 0    | 30    | 0.12   | 1    | <a href="#">K.YAVSISK.K</a> <a href="#">177</a> |



|                       |           |           |           |         |   |      |         |   |                                                                                                                                                                      |
|-----------------------|-----------|-----------|-----------|---------|---|------|---------|---|----------------------------------------------------------------------------------------------------------------------------------------------------------------------|
| <a href="#">232</a>   | 800.4920  | 799.4847  | 799.4803  | 0.0044  | 0 | 38   | 0.029   | 1 | K.VELAIQK.L <a href="#">233</a> <a href="#">234</a>                                                                                                                  |
| <a href="#">264</a>   | 816.6540  | 815.6467  | 815.4137  | 0.2330  | 0 | 21   | 1.6     | 2 | K.NLDAEVR.D <a href="#">262</a>                                                                                                                                      |
| <a href="#">294</a>   | 831.4050  | 830.3977  | 830.4385  | -0.0408 | 0 | 31   | 0.19    | 1 | K.EIEDVVK.I <a href="#">296</a> <a href="#">299</a> <a href="#">304</a>                                                                                              |
| <a href="#">671</a>   | 958.3960  | 957.3887  | 957.5131  | -0.1244 | 0 | 27   | 0.36    | 1 | R.GQTVDPITK.I <a href="#">674</a>                                                                                                                                    |
| <a href="#">751</a>   | 487.1471  | 972.2797  | 969.5243  | 2.7554  | 0 | 23   | 0.94    | 1 | K.AVTEGPAAVR.E                                                                                                                                                       |
| <a href="#">948</a>   | 1017.2320 | 1016.2247 | 1015.5298 | 0.6949  | 1 | 28   | 0.29    | 1 | R.DDLLAEGKR.L                                                                                                                                                        |
| <a href="#">1129</a>  | 1056.5860 | 1055.5787 | 1055.6199 | -0.0412 | 2 | 6    | 41      | 1 | K.EIRIQRNK.F                                                                                                                                                         |
| <a href="#">1189</a>  | 534.8451  | 1067.6757 | 1067.5287 | 0.1470  | 0 | 32   | 0.086   | 1 | K.DAFKPAYEK.L <a href="#">1188</a>                                                                                                                                   |
| <a href="#">1309</a>  | 545.6866  | 1089.3587 | 1088.5979 | 0.7609  | 0 | 74   | 7.8e-06 | 1 | M.VQSSVLGFPR.M <a href="#">1303</a> <a href="#">1305</a> <a href="#">1314</a> <a href="#">1321</a>                                                                   |
| <a href="#">1379</a>  | 1104.6170 | 1103.6097 | 1102.5804 | 1.0293  | 0 | 12   | 12      | 4 | K.AALTNMVNAK.Y                                                                                                                                                       |
| <a href="#">1411</a>  | 555.2721  | 1108.5297 | 1108.5553 | -0.0256 | 0 | (78) | 2.7e-06 | 1 | K.VFIDEAYPR.H <a href="#">1417</a>                                                                                                                                   |
| <a href="#">1531</a>  | 1129.7040 | 1128.6967 | 1127.5288 | 1.1680  | 0 | 26   | 0.5     | 1 | R.DWFSFAVEK.T <a href="#">1523</a> <a href="#">1525</a>                                                                                                              |
| <a href="#">1608</a>  | 570.3821  | 1138.7497 | 1138.6346 | 0.1151  | 0 | 25   | 0.47    | 1 | K.VIQVDEPALR.E <a href="#">1612</a> <a href="#">1616</a> <a href="#">1617</a> <a href="#">1628</a> <a href="#">1629</a>                                              |
| <a href="#">1902</a>  | 601.1736  | 1200.3327 | 1199.6146 | 0.7181  | 1 | 64   | 6.9e-05 | 1 | R.VPSEQEIKDR.V                                                                                                                                                       |
| <a href="#">2000</a>  | 610.1736  | 1218.3327 | 1217.6261 | 0.7067  | 0 | (43) | 0.0083  | 1 | K.GMLTGPITCLR.W <a href="#">1996</a>                                                                                                                                 |
| <a href="#">2082</a>  | 617.9781  | 1233.9417 | 1233.6210 | 0.3208  | 0 | 51   | 0.0015  | 1 | K.GMLTGPITCLR.W <a href="#">2088</a> <a href="#">2093</a> <a href="#">2094</a>                                                                                       |
| <a href="#">2274</a>  | 630.2026  | 1258.3907 | 1257.5448 | 0.8459  | 0 | 64   | 7.9e-05 | 1 | R.NDMVQYFGER.L <a href="#">2272</a>                                                                                                                                  |
| <a href="#">2401</a>  | 637.1831  | 1272.3517 | 1271.6609 | 0.6909  | 0 | 13   | 9.2     | 4 | R.DEVIDLEAAGIK.V <a href="#">2393</a>                                                                                                                                |
| <a href="#">2418</a>  | 637.7901  | 1273.5657 | 1273.5397 | 0.0260  | 0 | (45) | 0.0059  | 1 | R.NDMVQYFGER.L <a href="#">2414</a> <a href="#">2430</a> <a href="#">2433</a>                                                                                        |
| <a href="#">3080</a>  | 674.6756  | 1347.3367 | 1347.7286 | -0.3918 | 1 | 10   | 15      | 2 | K.FIEKEIEDVVK.I                                                                                                                                                      |
| <a href="#">3762</a>  | 712.2931  | 1422.5717 | 1420.7497 | 1.8220  | 1 | 2    | 86      | 9 | M.VQSSVLGFPRMGK.L                                                                                                                                                    |
| <a href="#">4005</a>  | 724.7316  | 1447.4487 | 1446.7368 | 0.7119  | 0 | 72   | 9.6e-06 | 1 | R.HIGPGVYDIHSPR.V <a href="#">4001</a> <a href="#">4014</a> <a href="#">4016</a>                                                                                     |
| <a href="#">4769</a>  | 768.7591  | 1535.5037 | 1535.7952 | -0.2915 | 1 | 3    | 70      | 4 | -.MVQSSVLGFPRMGK.L                                                                                                                                                   |
| <a href="#">5312</a>  | 794.7321  | 1587.4497 | 1587.7814 | -0.3317 | 0 | 4    | 63      | 6 | K.DGQAAIDVPSLEMVK.W                                                                                                                                                  |
| <a href="#">6197</a>  | 829.3821  | 1656.7497 | 1655.9498 | 0.7999  | 0 | 79   | 1.8e-06 | 1 | K.INDLLPVYVELLQK.L <a href="#">6195</a> <a href="#">6196</a> <a href="#">6204</a> <a href="#">6206</a> <a href="#">6220</a>                                          |
| <a href="#">6752</a>  | 566.5959  | 1696.7657 | 1695.9559 | 0.8098  | 0 | 59   | 0.00017 | 1 | K.LAEQPKPVVQFLEAK.E <a href="#">6751</a> <a href="#">6754</a> <a href="#">6756</a>                                                                                   |
| <a href="#">6944</a>  | 856.6786  | 1711.3427 | 1710.7824 | 0.5603  | 0 | 43   | 0.0069  | 1 | K.YNLHPVDEYFAMGR.G                                                                                                                                                   |
| <a href="#">7095</a>  | 864.5356  | 1727.0567 | 1726.7773 | 0.2794  | 0 | (42) | 0.0083  | 1 | K.YNLHPVDEYFAMGR.G <a href="#">7108</a> <a href="#">7112</a> <a href="#">7113</a>                                                                                    |
| <a href="#">8015</a>  | 908.1986  | 1814.3827 | 1812.8900 | 1.4927  | 2 | 1    | 1.1e+02 | 1 | K.VKERQAAVTEEMHNR.K                                                                                                                                                  |
| <a href="#">8210</a>  | 613.0085  | 1836.0037 | 1836.9702 | -0.9665 | 2 | 4    | 51      | 1 | -.MVQSSVLGFPRMGKLR.D                                                                                                                                                 |
| <a href="#">8624</a>  | 628.6912  | 1883.0517 | 1880.0731 | 2.9786  | 1 | 2    | 85      | 7 | K.TAEVVVIAKAVTEGPAAVR.E                                                                                                                                              |
| <a href="#">8805</a>  | 634.0499  | 1899.1277 | 1897.1288 | 1.9989  | 1 | 3    | 62      | 8 | K.INDLLPVYVELLQKLE.E                                                                                                                                                 |
| <a href="#">9850</a>  | 676.3005  | 2025.8797 | 2023.9851 | 1.8946  | 0 | 33   | 0.061   | 1 | K.IQEELDLDFVHGEPEP.N <a href="#">9822</a> <a href="#">9824</a> <a href="#">9826</a> <a href="#">9844</a> <a href="#">9845</a> <a href="#">9851</a> <a href="#">9</a> |
| <a href="#">10225</a> | 1031.9156 | 2061.8167 | 2061.1147 | 0.7021  | 0 | 84   | 5.7e-07 | 1 | K.SINLPLFPPTTIGSFPTK.E <a href="#">10219</a> <a href="#">10231</a> <a href="#">10234</a> <a href="#">10241</a> <a href="#">1024</a>                                  |
| <a href="#">10320</a> | 1037.8371 | 2073.6597 | 2072.0116 | 1.6481  | 0 | 9    | 18      | 1 | R.LTGYVFTTHAVVQSYGSR.C                                                                                                                                               |
| <a href="#">10429</a> | 697.0252  | 2088.0537 | 2088.1579 | -0.1042 | 0 | 2    | 93      | 6 | R.VIVATSSSLHVPHTLASEK.N                                                                                                                                              |
| <a href="#">11101</a> | 728.0915  | 2181.2527 | 2180.2933 | 0.9594  | 0 | 62   | 7.7e-05 | 1 | K.EAGIVTRPVILGPVSFLTAK.A <a href="#">11097</a> <a href="#">11098</a> <a href="#">11099</a> <a href="#">11100</a> <a href="#">11</a>                                  |
| <a href="#">13094</a> | 1234.9541 | 2467.8937 | 2466.3161 | 1.5777  | 2 | 1    | 1e+02   | 1 | K.YAVSISKPMKGMTGPITCLR.W <a href="#">13080</a> <a href="#">13103</a>                                                                                                 |
| <a href="#">13608</a> | 844.6452  | 2530.9137 | 2530.1917 | 0.7220  | 0 | 46   | 0.0028  | 1 | K.WFDSNYHYVKPTLQDNQTFK.L <a href="#">13592</a>                                                                                                                       |
| <a href="#">13626</a> | 845.7395  | 2534.1967 | 2535.3665 | -1.1698 | 1 | 8    | 21      | 1 | R.CVRPPIVGDISRPAQMTVKESK.Y <a href="#">13640</a> <a href="#">13650</a>                                                                                               |
| <a href="#">13986</a> | 1303.3926 | 2604.7707 | 2604.3508 | 0.4200  | 0 | 82   | 7e-07   | 1 | R.NPEQLDTVVGALGPNQVLSAGVVDGR.N <a href="#">13994</a>                                                                                                                 |

11. [gi|220690467|gb|EED46816.1|](#) **Mass:** 37432 **Score:** 1162 **Queries matched:** 109 **emPAI:** 4.94  
alcohol dehydrogenase, putative [Aspergillus flavus NRRL3357]

| Query                 | Observed  | Mr(expt)  | Mr(calc)  | Delta   | Miss | Score | Expect  | Rank | Peptide                                                                                                                                                              |
|-----------------------|-----------|-----------|-----------|---------|------|-------|---------|------|----------------------------------------------------------------------------------------------------------------------------------------------------------------------|
| <a href="#">832</a>   | 988.5260  | 987.5187  | 987.5237  | -0.0050 | 0    | 48    | 0.0033  | 1    | K.TQDLVADV.K <a href="#">831</a> <a href="#">839</a>                                                                                                                 |
| <a href="#">903</a>   | 502.0581  | 1002.1017 | 1001.5658 | 0.5359  | 0    | 50    | 0.0022  | 1    | R.APVFNTVVR.M <a href="#">904</a>                                                                                                                                    |
| <a href="#">941</a>   | 1016.6730 | 1015.6657 | 1015.5186 | 0.1471  | 0    | 41    | 0.016   | 1    | R.VVAIDGGEEK.Q <a href="#">943</a>                                                                                                                                   |
| <a href="#">1336</a>  | 548.4836  | 1094.9527 | 1093.5478 | 1.4050  | 0    | 35    | 0.052   | 1    | K.IFELMEQK.I <a href="#">1327</a> <a href="#">1331</a>                                                                                                               |
| <a href="#">2264</a>  | 629.7411  | 1257.4677 | 1258.6921 | -1.2244 | 1    | 12    | 11      | 2    | K.IAGRYVLEIPE.- <a href="#">2266</a>                                                                                                                                 |
| <a href="#">3129</a>  | 676.5956  | 1351.1767 | 1350.7078 | 0.4689  | 1    | 4     | 55      | 4    | R.MINIKGSYVGNR.Q                                                                                                                                                     |
| <a href="#">3149</a>  | 677.7656  | 1353.5167 | 1352.6361 | 0.8806  | 0    | 87    | 2.8e-07 | 1    | R.QDGVEAVDFAR.G <a href="#">3150</a>                                                                                                                                 |
| <a href="#">3295</a>  | 684.6351  | 1367.2557 | 1366.7027 | 0.5530  | 1    | (4)   | 60      | 10   | R.MINIKGSYVGNR.Q                                                                                                                                                     |
| <a href="#">3952</a>  | 722.2236  | 1442.4327 | 1440.8453 | 1.5874  | 0    | 9     | 17      | 2    | R.GTVVAIGLPAGAF.LR.A <a href="#">3947</a> <a href="#">3954</a>                                                                                                       |
| <a href="#">4443</a>  | 751.3976  | 1500.7807 | 1499.7191 | 1.0616  | 0    | 60    | 0.00018 | 1    | R.YSGVCHTDLHALK.G                                                                                                                                                    |
| <a href="#">4917</a>  | 517.2625  | 1548.7657 | 1547.8242 | 0.9415  | 0    | (28)  | 0.25    | 1    | K.MPLVGGHEGAGVVAR.G <a href="#">4905</a>                                                                                                                             |
| <a href="#">5068</a>  | 782.8416  | 1563.6687 | 1563.8192 | -0.1504 | 0    | 81    | 1.1e-06 | 1    | K.MPLVGGHEGAGVVAR.G <a href="#">5071</a> <a href="#">5074</a> <a href="#">5084</a> <a href="#">5089</a> <a href="#">5093</a>                                         |
| <a href="#">5843</a>  | 815.7421  | 1629.4697 | 1628.9501 | 0.5196  | 0    | 40    | 0.016   | 1    | K.QIPVPKPGPDEILV.V <a href="#">5842</a> <a href="#">5848</a> <a href="#">5851</a>                                                                                    |
| <a href="#">6038</a>  | 823.6196  | 1645.2247 | 1643.6895 | 1.5353  | 0    | 51    | 0.0013  | 1    | K.WLNGSCLACEFCK.Q <a href="#">6024</a> <a href="#">6043</a>                                                                                                          |
| <a href="#">6789</a>  | 851.0226  | 1700.0307 | 1699.8417 | 0.1890  | 0    | 120   | 1.3e-10 | 1    | R.GDLVTEFEIGDHAGL.W <a href="#">6772</a> <a href="#">6776</a> <a href="#">6783</a> <a href="#">6785</a> <a href="#">6786</a> <a href="#">6790</a> <a href="#">67</a> |
| <a href="#">7353</a>  | 878.6471  | 1755.2797 | 1754.8886 | 0.3911  | 1    | 16    | 3.6     | 2    | K.VRYSGVCHTDLHALK.G                                                                                                                                                  |
| <a href="#">9313</a>  | 981.3106  | 1960.6067 | 1959.8706 | 0.7361  | 0    | 33    | 0.066   | 1    | K.QAMCEQLGAEAYVDFTK.T <a href="#">9322</a>                                                                                                                           |
| <a href="#">9646</a>  | 1001.2456 | 2000.4767 | 1999.0812 | 1.3955  | 0    | 71    | 1.2e-05 | 1    | K.NVPLDAVAVPLCAGITVYK.G <a href="#">9625</a> <a href="#">9641</a> <a href="#">9645</a> <a href="#">9647</a> <a href="#">9651</a> <a href="#">965</a>                 |
| <a href="#">12997</a> | 819.7555  | 2456.2447 | 2454.3304 | 1.9143  | 2    | 1     | 1e+02   | 4    | K.TAPLQDLPKIFELMEQK.IAGR.Y                                                                                                                                           |
| <a href="#">13512</a> | 841.5515  | 2521.6327 | 2519.2552 | 2.3775  | 1    | 2     | 72      | 5    | -.MSIPEMQWAQVAEQKGGPLIYK.Q <a href="#">13527</a>                                                                                                                     |
| <a href="#">14278</a> | 886.5579  | 2656.6517 | 2655.4344 | 1.2173  | 0    | 81    | 8.8e-07 | 1    | K.ESGVRPGQTVAIVGAGGGLGSLALQYAK.A <a href="#">14262</a> <a href="#">14268</a> <a href="#">14270</a>                                                                   |
| <a href="#">15396</a> | 991.6642  | 2971.9707 | 2973.3736 | -1.4029 | 1    | 3     | 57      | 3    | R.VVAIDGGEEKQAMCEQLGAEAYVDFTK.T                                                                                                                                      |
| <a href="#">15505</a> | 1011.3115 | 3030.9127 | 3029.4077 | 1.5051  | 0    | 29    | 0.14    | 1    | K.QADEPLCPNASLSGYTVDGTFQQAIGK.A                                                                                                                                      |
| <a href="#">15754</a> | 1040.9625 | 3119.8657 | 3119.6767 | 0.1890  | 0    | 72    | 5.7e-06 | 1    | K.AATPEGLGAHAVILLAVAEPFQQAAYVR.S <a href="#">15758</a> <a href="#">15759</a> <a href="#">1576</a>                                                                    |

## Proteins matching the same set of peptides:

[gi|226693510|sp|P41747.2|ADH1\\_ASPFN](#) **Mass:** 37432 **Score:** 1162 **Queries matched:** 109

RecName: Full=Alcohol dehydrogenase 1; AltName: Full=Alcohol dehydrogenase I

12. [gi|220693770|gb|EED50115.1|](#) **Mass:** 44399 **Score:** 1075 **Queries matched:** 124 **emPAI:** 4.59  
phosphoglycerate kinase PgkA, putative [Aspergillus flavus NRRL3357]

| Query               | Observed | Mr(expt) | Mr(calc) | Delta   | Miss | Score | Expect | Rank | Peptide                         |
|---------------------|----------|----------|----------|---------|------|-------|--------|------|---------------------------------|
| <a href="#">11</a>  | 632.4010 | 631.3937 | 631.3541 | 0.0397  | 0    | 36    | 0.077  | 1    | K.TIAEAK.T <a href="#">12</a>   |
| <a href="#">31</a>  | 656.3770 | 655.3697 | 655.4493 | -0.0796 | 1    | 11    | 8.2    | 6    | K.RVLIR.V                       |
| <a href="#">109</a> | 721.5540 | 720.5467 | 720.4170 | 0.1297  | 0    | 15    | 5.4    | 2    | K.ASGFLVK.K <a href="#">108</a> |
| <a href="#">129</a> | 738.5340 | 737.5267 | 737.3959 | 0.1308  | 0    | 18    | 1.9    | 1    | K.SVELYK.K <a href="#">128</a>  |

|                       |           |           |           |         |   |      |         |    |                                                                                                                                                       |
|-----------------------|-----------|-----------|-----------|---------|---|------|---------|----|-------------------------------------------------------------------------------------------------------------------------------------------------------|
| <a href="#">349</a>   | 849.5340  | 848.5267  | 848.5120  | 0.0147  | 1 | 19   | 2.6     | 4  | K.ASGFLVKK.E                                                                                                                                          |
| <a href="#">395</a>   | 432.7376  | 863.4607  | 864.4341  | -0.9734 | 0 | 13   | 10      | 3  | K.YAIENGAK.A                                                                                                                                          |
| <a href="#">422</a>   | 872.6150  | 871.6077  | 871.5015  | 0.1062  | 0 | 40   | 0.019   | 1  | K.IVGDIVEK.A <a href="#">420</a> <a href="#">421</a> <a href="#">423</a>                                                                              |
| <a href="#">491</a>   | 899.3260  | 898.3187  | 898.4436  | -0.1249 | 0 | 24   | 0.57    | 1  | K.ELEYFAK.A <a href="#">495</a> <a href="#">496</a>                                                                                                   |
| <a href="#">539</a>   | 911.6280  | 910.6207  | 910.5851  | 0.0356  | 0 | 30   | 0.15    | 1  | R.IVGALPTIK.Y <a href="#">538</a> <a href="#">541</a> <a href="#">543</a> <a href="#">546</a>                                                         |
| <a href="#">692</a>   | 481.2821  | 960.5497  | 960.4764  | 0.0734  | 0 | 16   | 5       | 4  | K.ETEEIVNK.A                                                                                                                                          |
| <a href="#">823</a>   | 494.2406  | 986.4667  | 986.5648  | -0.0981 | 0 | 47   | 0.0036  | 1  | K.LAITDVDLK.D <a href="#">825</a> <a href="#">828</a> <a href="#">830</a>                                                                             |
| <a href="#">1279</a>  | 543.3551  | 1084.6957 | 1084.6128 | 0.0829  | 0 | 39   | 0.02    | 1  | K.VLPGVDALSSK.- <a href="#">1277</a> <a href="#">1278</a> <a href="#">1286</a> <a href="#">1287</a> <a href="#">1293</a>                              |
| <a href="#">1470</a>  | 1120.6600 | 1119.6527 | 1119.4832 | 0.1695  | 0 | 56   | 0.00046 | 1  | R.FHAEEGSSK.D                                                                                                                                         |
| <a href="#">1729</a>  | 584.0551  | 1166.0957 | 1165.7070 | 0.3887  | 0 | 57   | 0.00028 | 1  | K.IQLIDNLLPK.V <a href="#">1728</a> <a href="#">1731</a> <a href="#">1743</a>                                                                         |
| <a href="#">2025</a>  | 612.6761  | 1223.3377 | 1222.6016 | 0.7361  | 0 | 61   | 0.00013 | 1  | K.SVIFAENCVGK.E <a href="#">2028</a>                                                                                                                  |
| <a href="#">2107</a>  | 619.4396  | 1236.8647 | 1236.5986 | 0.2661  | 0 | 82   | 9.8e-07 | 1  | K.IGNSLFDEAGSK.I <a href="#">2115</a> <a href="#">2116</a> <a href="#">2127</a> <a href="#">2129</a>                                                  |
| <a href="#">3223</a>  | 681.3686  | 1360.7227 | 1359.7034 | 1.0193  | 1 | 0    | 1.5e+02 | 9  | R.VDFNVPLDADKK.I                                                                                                                                      |
| <a href="#">3298</a>  | 684.7226  | 1367.4307 | 1367.6867 | -0.2560 | 0 | 72   | 8.5e-06 | 1  | R.AHSSMVGVDLPQK.A <a href="#">3297</a>                                                                                                                |
| <a href="#">3404</a>  | 689.3251  | 1376.6357 | 1376.7551 | -0.1194 | 0 | 13   | 9.3     | 1  | K.YSLKPVATELEK.L <a href="#">3424</a>                                                                                                                 |
| <a href="#">3468</a>  | 693.6516  | 1385.2887 | 1383.6817 | 1.6071  | 0 | (41) | 0.014   | 1  | R.AHSSMVGVDLPQK.A <a href="#">3459</a> <a href="#">3465</a>                                                                                           |
| <a href="#">4293</a>  | 494.3592  | 1480.0557 | 1478.8028 | 1.2530  | 0 | (23) | 0.74    | 1  | K.AVVLMSHLGRPDGK.A <a href="#">4286</a> <a href="#">4290</a>                                                                                          |
| <a href="#">4414</a>  | 748.7571  | 1495.4997 | 1494.7977 | 0.7020  | 0 | 32   | 0.088   | 1  | K.AVVLMSHLGRPDGK.A <a href="#">4402</a>                                                                                                               |
| <a href="#">5415</a>  | 799.2961  | 1596.5777 | 1594.9294 | 1.6483  | 1 | 56   | 0.00038 | 1  | K.VSDKIQLIDNLLPK.V <a href="#">5403</a> <a href="#">5405</a> <a href="#">5411</a>                                                                     |
| <a href="#">5615</a>  | 806.7766  | 1611.5387 | 1611.8694 | -0.3307 | 0 | (13) | 7.8     | 2  | K.VNSLIITGAMAFTFK.K <a href="#">5621</a> <a href="#">5635</a> <a href="#">5636</a>                                                                    |
| <a href="#">5832</a>  | 815.2796  | 1628.5447 | 1627.8644 | 0.6804  | 0 | 17   | 2.9     | 1  | K.VNSLIITGAMAFTFK.K <a href="#">5833</a> <a href="#">5834</a> <a href="#">5837</a> <a href="#">5838</a>                                               |
| <a href="#">5932</a>  | 546.6879  | 1637.0417 | 1636.9624 | 0.0793  | 1 | 1    | 1.1e+02 | 8  | K.ITNNQRIVGALPTIK.Y                                                                                                                                   |
| <a href="#">7351</a>  | 878.4806  | 1754.9467 | 1753.9210 | 1.0257  | 0 | 9    | 18      | 2  | K.LSHVSTGGGASLELLEGGK.V                                                                                                                               |
| <a href="#">7478</a>  | 884.3486  | 1766.6827 | 1765.0574 | 1.6254  | 2 | 8    | 24      | 3  | K.KITNNQRIVGALPTIK.Y <a href="#">7450</a> <a href="#">7485</a>                                                                                        |
| <a href="#">7484</a>  | 590.1412  | 1767.4017 | 1767.0043 | 0.3975  | 0 | 62   | 0.0001  | 1  | K.ALESPQRPFLAILGGAK.V <a href="#">7479</a> <a href="#">7486</a> <a href="#">7499</a> <a href="#">7508</a> <a href="#">7511</a>                        |
| <a href="#">7768</a>  | 895.7651  | 1789.5157 | 1786.9829 | 2.5328  | 1 | 20   | 1.4     | 1  | K.NNVKIVLPVDYVTADK.F <a href="#">7754</a>                                                                                                             |
| <a href="#">8710</a>  | 630.4475  | 1888.3207 | 1890.0132 | -1.6925 | 2 | 4    | 65      | 4  | -.MSLSNKLAITDVDLKDK.R                                                                                                                                 |
| <a href="#">9574</a>  | 665.0545  | 1992.1417 | 1989.9908 | 2.1509  | 0 | 60   | 0.00013 | 1  | K.GLTLALGDVYINDAFGTAHR.A <a href="#">9542</a> <a href="#">9544</a> <a href="#">9547</a> <a href="#">9550</a> <a href="#">9556</a> <a href="#">956</a> |
| <a href="#">10429</a> | 697.0252  | 2088.0537 | 2086.0881 | 1.9656  | 1 | 1    | 1.1e+02 | 8  | R.AHSSMVGVDLPQKASGFLVK.K                                                                                                                              |
| <a href="#">10641</a> | 1060.7316 | 2119.4487 | 2118.0858 | 1.3629  | 1 | 7    | 24      | 3  | R.KGLTLALGDVYINDAFGTAHR.A                                                                                                                             |
| <a href="#">10983</a> | 722.7375  | 2165.1907 | 2165.0674 | 0.1233  | 1 | 4    | 54      | 8  | K.SVIFAENCVGKETEEIVNK.A                                                                                                                               |
| <a href="#">11559</a> | 1123.2361 | 2244.4577 | 2243.9893 | 0.4685  | 0 | 111  | 9.7e-10 | 1  | K.TGYATDADGIPDGYMGLDVGEK.S <a href="#">11564</a> <a href="#">11565</a>                                                                                |
| <a href="#">11670</a> | 1131.9906 | 2261.9667 | 2259.9842 | 1.9825  | 0 | (0)  | 1.2e+02 | 2  | K.TGYATDADGIPDGYMGLDVGEK.S                                                                                                                            |
| <a href="#">11955</a> | 768.3372  | 2301.9897 | 2300.1841 | 1.8056  | 0 | 71   | 1.1e-05 | 1  | K.TILWNGPPGVFELEPFANATK.K <a href="#">11944</a> <a href="#">11947</a> <a href="#">11948</a> <a href="#">11949</a> <a href="#">11</a>                  |
| <a href="#">12563</a> | 798.6969  | 2393.0687 | 2390.2845 | 2.7842  | 2 | 3    | 64      | 5  | K.NNVKIVLPVDYVTADKFAADAK.T                                                                                                                            |
| <a href="#">12921</a> | 815.2799  | 2442.8177 | 2440.3400 | 2.4778  | 2 | 4    | 50      | 3  | K.VNSLIITGAMAFTFKKTLENVK.I                                                                                                                            |
| <a href="#">13234</a> | 829.2935  | 2484.8587 | 2483.3860 | 1.4728  | 2 | 2    | 86      | 4  | K.ITNNQRIVGALPTIKYAIENGAK.A                                                                                                                           |
| <a href="#">13597</a> | 844.3822  | 2530.1247 | 2527.3493 | 2.7754  | 0 | 15   | 3.8     | 1  | K.TLDAAVAAQSGSIVIIGGGDTATVAAK.Y <a href="#">13572</a> <a href="#">13579</a> <a href="#">13585</a>                                                     |
| <a href="#">14293</a> | 886.8319  | 2657.4737 | 2655.4443 | 2.0294  | 1 | 1    | 78      | 10 | K.KTLDAAVAAQSGSIVIIGGGDTATVAAK.Y <a href="#">14292</a>                                                                                                |

13. [gi|220698278|gb|EED54618.1|](#) Mass: 34593 Score: 1032 Queries matched: 48 emPAI: 2.00

60S ribosomal protein L5, putative [Aspergillus flavus NRRL3357]

| Query                 | Observed  | Mr(expt)  | Mr(calc)  | Delta   | Miss | Score | Expect  | Rank | Peptide                                                                                                                                                               |
|-----------------------|-----------|-----------|-----------|---------|------|-------|---------|------|-----------------------------------------------------------------------------------------------------------------------------------------------------------------------|
| <a href="#">34</a>    | 660.3000  | 659.2927  | 658.3261  | 0.9666  | 0    | 10    | 24      | 6    | -.MPFHK.Q                                                                                                                                                             |
| <a href="#">695</a>   | 481.4921  | 960.9697  | 960.5393  | 0.4305  | 0    | 52    | 0.0014  | 1    | K.AFLDVGLAR.T <a href="#">694</a>                                                                                                                                     |
| <a href="#">2095</a>  | 618.6266  | 1235.2387 | 1234.6346 | 0.6041  | 0    | 55    | 0.00057 | 1    | K.VFASAYAHLEK.R <a href="#">2079</a> <a href="#">2096</a>                                                                                                             |
| <a href="#">3519</a>  | 696.3401  | 1390.6657 | 1390.7357 | -0.0700 | 1    | 63    | 9.6e-05 | 1    | K.VFASAYAHLEKR.Y <a href="#">3524</a> <a href="#">3528</a> <a href="#">3533</a>                                                                                       |
| <a href="#">4525</a>  | 755.5681  | 1509.1217 | 1507.7379 | 1.3838  | 0    | 56    | 0.00039 | 1    | K.GASDGGILVPHSEN.R <a href="#">4517</a> <a href="#">4522</a> <a href="#">4524</a>                                                                                     |
| <a href="#">4657</a>  | 762.6946  | 1523.3747 | 1522.6787 | 0.6960  | 2    | 12    | 9.6     | 1    | R.EDPFKKDEDEGSK.K                                                                                                                                                     |
| <a href="#">6515</a>  | 841.2901  | 1680.5657 | 1679.8618 | 0.7040  | 0    | 83    | 6.6e-07 | 1    | R.DIITQIVYSEISGDK.V <a href="#">6511</a> <a href="#">6512</a> <a href="#">6514</a> <a href="#">6518</a> <a href="#">6523</a> <a href="#">6528</a> <a href="#">653</a> |
| <a href="#">11024</a> | 724.1829  | 2169.5267 | 2171.0793 | -1.5526 | 1    | 8     | 19      | 1    | R.VFAAMKASDGGILVPHSEN.R                                                                                                                                               |
| <a href="#">12038</a> | 1156.8551 | 2311.6957 | 2309.2168 | 2.4789  | 0    | 81    | 9.2e-07 | 1    | R.YGITNGLTNWAAAYATGLLLAR.R <a href="#">12015</a> <a href="#">12016</a> <a href="#">12020</a> <a href="#">12025</a> <a href="#">1</a>                                  |
| <a href="#">12222</a> | 1170.7121 | 2339.4097 | 2337.0648 | 2.3449  | 0    | 109   | 1.7e-09 | 1    | K.YLENEVEAGDIEDLYTEAHK.A <a href="#">12207</a> <a href="#">12208</a> <a href="#">12214</a> <a href="#">12217</a> <a href="#">122</a>                                  |
| <a href="#">15123</a> | 950.8869  | 2849.6387 | 2848.2398 | 1.3989  | 1    | 23    | 0.59    | 2    | R.NYIFGGHVAEYMEGLADDDEERYR.G <a href="#">15126</a>                                                                                                                    |

14. [gi|220696531|gb|EED52873.1|](#) Mass: 62404 Score: 1028 Queries matched: 82 emPAI: 1.94

antigenic mitochondrial protein HSP60, putative [Aspergillus flavus NRRL3357]

| Query                | Observed | Mr(expt)  | Mr(calc)  | Delta   | Miss | Score | Expect  | Rank | Peptide                                                                                                  |
|----------------------|----------|-----------|-----------|---------|------|-------|---------|------|----------------------------------------------------------------------------------------------------------|
| <a href="#">138</a>  | 745.5370 | 744.5297  | 744.4382  | 0.0916  | 0    | 21    | 1.7     | 1    | K.EGVITVK.E                                                                                              |
| <a href="#">322</a>  | 843.5790 | 842.5717  | 842.5226  | 0.0492  | 0    | 21    | 1.3     | 2    | K.LSGGVAVIK.V <a href="#">323</a>                                                                        |
| <a href="#">424</a>  | 873.5660 | 872.5587  | 872.4967  | 0.0620  | 0    | 33    | 0.1     | 1    | R.LLQDVASK.T <a href="#">426</a>                                                                         |
| <a href="#">478</a>  | 894.5330 | 893.5257  | 893.4858  | 0.0399  | 0    | 14    | 6.6     | 1    | R.AIFSETVK.N <a href="#">479</a>                                                                         |
| <a href="#">556</a>  | 457.7271 | 913.4397  | 912.5393  | 0.9005  | 0    | 30    | 0.18    | 1    | R.GQLQVAVK.A <a href="#">551</a> <a href="#">563</a>                                                     |
| <a href="#">679</a>  | 479.9816 | 957.9487  | 957.5243  | 0.4244  | 0    | 68    | 3.3e-05 | 1    | R.VVDALNATR.A <a href="#">680</a>                                                                        |
| <a href="#">1048</a> | 521.6276 | 1041.2407 | 1040.4848 | 0.7559  | 0    | 16    | 3.6     | 1    | K.GEYVDMISK.G                                                                                            |
| <a href="#">1682</a> | 578.3381 | 1154.6617 | 1154.7387 | -0.0770 | 1    | 9     | 17      | 2    | R.LAKLSGGVAVIK.V <a href="#">1678</a> <a href="#">1684</a>                                               |
| <a href="#">2578</a> | 646.3106 | 1290.6067 | 1288.6510 | 1.9557  | 0    | 10    | 17      | 6    | K.EDTIILNGEGTK.D                                                                                         |
| <a href="#">2697</a> | 652.7286 | 1303.4427 | 1302.6820 | 0.7608  | 0    | 43    | 0.0092  | 1    | R.NVLIDTPYGSPK.I <a href="#">2685</a> <a href="#">2698</a>                                               |
| <a href="#">2808</a> | 659.5696 | 1317.1247 | 1316.5965 | 0.5282  | 0    | (61)  | 0.00014 | 1    | K.NVAAGCNPMDLR.R <a href="#">2797</a>                                                                    |
| <a href="#">2957</a> | 667.5881 | 1333.1617 | 1332.5914 | 0.5703  | 0    | 62    | 0.00012 | 1    | K.NVAAGCNPMDLR.R <a href="#">2961</a>                                                                    |
| <a href="#">3221</a> | 454.5569 | 1360.6487 | 1358.6579 | 1.9909  | 1    | 10    | 15      | 5    | K.LTEEHAKDFNR.G                                                                                          |
| <a href="#">3529</a> | 696.7471 | 1391.4797 | 1391.6609 | -0.1812 | 0    | 85    | 5.1e-07 | 1    | R.GYTSPYFITDTK.S <a href="#">3535</a>                                                                    |
| <a href="#">4642</a> | 762.3081 | 1522.6017 | 1520.7028 | 1.8989  | 0    | (1)   | 1.2e+02 | 8    | K.TLEDELEVTEGMR.F                                                                                        |
| <a href="#">4801</a> | 770.3821 | 1538.7497 | 1536.6977 | 2.0520  | 0    | 28    | 0.25    | 1    | K.TLEDELEVTEGMR.F <a href="#">4778</a>                                                                   |
| <a href="#">4855</a> | 772.8056 | 1543.5967 | 1543.8861 | -0.2894 | 0    | 49    | 0.0018  | 1    | K.VEFEKPLILLSEK.K <a href="#">4865</a> <a href="#">4872</a> <a href="#">4876</a>                         |
| <a href="#">5326</a> | 795.2541 | 1588.4937 | 1587.8369 | 0.6568  | 1    | 54    | 0.00064 | 1    | K.AVQLQDKFENLGAR.L <a href="#">5327</a> <a href="#">5357</a>                                             |
| <a href="#">5414</a> | 799.2446 | 1596.4747 | 1594.8930 | 1.5817  | 0    | 86    | 3.8e-07 | 1    | R.AAVEEGILPGGTTALLK.A <a href="#">5424</a>                                                               |
| <a href="#">5624</a> | 806.9131 | 1611.8117 | 1611.8832 | -0.0715 | 0    | 8     | 25      | 3    | R.QIVENAGLEGSVIVGK.L <a href="#">5607</a> <a href="#">5614</a> <a href="#">5619</a> <a href="#">5635</a> |
| <a href="#">6106</a> | 826.0336 | 1650.0527 | 1649.8546 | 0.1981  | 0    | 85    | 5.4e-07 | 1    | K.LTPDMLGSTGSITITK.E                                                                                     |
| <a href="#">6607</a> | 562.8589 | 1685.5547 | 1683.7661 | 1.7886  | 1    | 8     | 25      | 3    | R.GVMADPTTSEYEKEK.L                                                                                      |

|                       |           |           |           |         |   |     |         |   |                                                                                                                                |
|-----------------------|-----------|-----------|-----------|---------|---|-----|---------|---|--------------------------------------------------------------------------------------------------------------------------------|
| <a href="#">7097</a>  | 864.7131  | 1727.4117 | 1726.9115 | 0.5003  | 1 | 4   | 51      | 3 | R.GQLQVAAVKAPGFGDNR.K                                                                                                          |
| <a href="#">7327</a>  | 876.6786  | 1751.3427 | 1750.8156 | 0.5271  | 0 | 98  | 2e-08   | 1 | K.TNELAGDGTATCLAR.A <a href="#">7328</a>                                                                                       |
| <a href="#">7660</a>  | 594.6512  | 1780.9317 | 1778.9124 | 2.0193  | 1 | 4   | 60      | 7 | K.GEYVDMISKGIVDPLK.V                                                                                                           |
| <a href="#">8057</a>  | 909.7626  | 1817.5107 | 1816.9319 | 0.5788  | 0 | 89  | 1.9e-07 | 1 | R.GIQAAVEAAVDYLQQNK.R <a href="#">8050</a> <a href="#">8054</a> <a href="#">8058</a> <a href="#">8062</a> <a href="#">8066</a> |
| <a href="#">8789</a>  | 633.6189  | 1897.8347 | 1897.0520 | 0.7827  | 0 | 61  | 0.0001  | 1 | K.ISAVQDIIPALEASTTLR.R <a href="#">8783</a> <a href="#">8798</a> <a href="#">8799</a> <a href="#">8808</a>                     |
| <a href="#">8834</a>  | 634.8565  | 1901.5477 | 1902.7192 | -1.1714 | 0 | (2) | 85      | 8 | K.APAAPGGMGGMGGMGGMGGMF.- <a href="#">8862</a>                                                                                 |
| <a href="#">8859</a>  | 635.4175  | 1903.2307 | 1902.7192 | 0.5116  | 0 | (0) | 1.3e+02 | 4 | K.APAAPGGMGGMGGMGGMGGMF.-                                                                                                      |
| <a href="#">9007</a>  | 640.6975  | 1919.0707 | 1918.7141 | 0.3566  | 0 | 5   | 48      | 4 | K.APAAPGGMGGMGGMGGMGGMF.-                                                                                                      |
| <a href="#">9426</a>  | 659.2422  | 1974.7047 | 1973.0330 | 1.6717  | 1 | 43  | 0.0062  | 1 | R.GIQAAVEAAVDYLQQNK.R <a href="#">9429</a>                                                                                     |
| <a href="#">9869</a>  | 676.6652  | 2026.9737 | 2025.1470 | 1.8268  | 1 | 3   | 57      | 4 | K.KISAVQDIIPALEASTTLR.R                                                                                                        |
| <a href="#">13231</a> | 829.1845  | 2484.5317 | 2482.3180 | 2.2138  | 0 | 49  | 0.0017  | 1 | K.AAANGLDNVKNPANFDQQLGVSIIK.N <a href="#">13207</a> <a href="#">13223</a> <a href="#">13228</a>                                |
| <a href="#">14118</a> | 876.6785  | 2627.0137 | 2626.2908 | 0.7229  | 1 | 47  | 0.0025  | 1 | K.TNELAGDGTATCLARAISETVK.N <a href="#">14119</a>                                                                               |
| <a href="#">14289</a> | 886.7782  | 2657.3127 | 2655.3855 | 1.9273  | 0 | 23  | 0.51    | 1 | R.TALVDASGVASLLGTTEVAIVDAPEEK.A <a href="#">14275</a> <a href="#">14276</a> <a href="#">14279</a> <a href="#">14280</a>        |
| <a href="#">16071</a> | 1097.4175 | 3289.2307 | 3290.7167 | -1.4860 | 2 | 1   | 78      | 3 | K.LEKLTDPMLGSGTGSITITKEDTIILNGEGTK.D                                                                                           |

15. [gi|220694869|gb|EED51212.1|](#) Mass: 34829 Score: 982 Queries matched: 47 emPAI: 1.72

malate dehydrogenase, NAD-dependent [Aspergillus flavus NRRL3357]

| Query                 | Observed  | Mr(expt)  | Mr(calc)  | Delta   | Miss | Score | Expect  | Rank | Peptide                                                                                                            |
|-----------------------|-----------|-----------|-----------|---------|------|-------|---------|------|--------------------------------------------------------------------------------------------------------------------|
| <a href="#">51</a>    | 339.9126  | 677.8107  | 677.3748  | 0.4359  | 0    | 26    | 0.48    | 1    | K.GIDFVK.N <a href="#">50</a>                                                                                      |
| <a href="#">132</a>   | 742.5000  | 741.4927  | 741.4497  | 0.0430  | 0    | 11    | 12      | 3    | K.INAGIVR.D                                                                                                        |
| <a href="#">228</a>   | 793.4880  | 792.4807  | 792.4381  | 0.0426  | 0    | 28    | 0.26    | 1    | R.FAESVIK.A <a href="#">229</a>                                                                                    |
| <a href="#">240</a>   | 804.4610  | 803.4537  | 803.4178  | 0.0360  | 0    | 16    | 6.1     | 2    | K.AAGVFDPK.R                                                                                                       |
| <a href="#">1967</a>  | 607.2641  | 1212.5137 | 1210.6710 | 1.8427  | 1    | 4     | 67      | 9    | K.GIDFVKNPPPK.L                                                                                                    |
| <a href="#">2003</a>  | 610.6796  | 1219.3447 | 1218.6972 | 0.6475  | 0    | 72    | 1.1e-05 | 1    | R.LFGVTTLDVVR.A <a href="#">2004</a> <a href="#">2016</a>                                                          |
| <a href="#">2043</a>  | 614.1861  | 1226.3577 | 1225.6554 | 0.7023  | 0    | 39    | 0.019   | 1    | K.TTPAIQIPEEK.Y <a href="#">2046</a> <a href="#">2055</a>                                                          |
| <a href="#">2453</a>  | 639.3316  | 1276.6487 | 1275.6459 | 1.0028  | 0    | 40    | 0.016   | 1    | R.VQFGGDEVVQAK.D <a href="#">2456</a>                                                                              |
| <a href="#">2868</a>  | 663.5951  | 1325.1757 | 1322.6653 | 2.5105  | 1    | 8     | 26      | 6    | R.KPGMTRDDLK.I                                                                                                     |
| <a href="#">3191</a>  | 453.7812  | 1358.3217 | 1359.7510 | -1.4293 | 1    | 3     | 82      | 10   | R.DDLFKINAGIVR.D                                                                                                   |
| <a href="#">3365</a>  | 687.6706  | 1373.3267 | 1371.6307 | 1.6961  | 0    | 57    | 0.00032 | 1    | R.AETFTQEFSGQK.D <a href="#">3342</a> <a href="#">3364</a>                                                         |
| <a href="#">3632</a>  | 702.6186  | 1403.2227 | 1402.7303 | 0.4924  | 1    | 6     | 42      | 4    | K.ASNVLEGVTEKEK.K <a href="#">3629</a>                                                                             |
| <a href="#">6662</a>  | 845.7396  | 1689.4647 | 1688.9937 | 0.4710  | 0    | 92    | 1e-07   | 1    | K.QALTGANIVVIPAGIPR.K <a href="#">6675</a> <a href="#">6693</a>                                                    |
| <a href="#">7455</a>  | 883.3336  | 1764.6527 | 1764.0509 | 0.6018  | 0    | 107   | 2.9e-09 | 1    | K.AAVLGASGGIGQPLSLLK.T <a href="#">7469</a> <a href="#">7478</a>                                                   |
| <a href="#">11803</a> | 1142.1166 | 2282.2187 | 2280.3093 | 1.9094  | 0    | 84    | 5.6e-07 | 1    | K.AFVLVISNPVNSTVPIAAEVLK.A <a href="#">11801</a>                                                                   |
| <a href="#">12850</a> | 1217.9406 | 2433.8667 | 2433.2904 | 0.5763  | 0    | 77    | 2.5e-06 | 1    | K.DPSAVQIPVVGHSGETIVPLFSK.T <a href="#">12859</a> <a href="#">12865</a> <a href="#">12875</a>                      |
| <a href="#">13240</a> | 1243.9421 | 2485.8697 | 2485.3105 | 0.5593  | 0    | 73    | 6.4e-06 | 1    | K.GQTGIVEPTFVYLPPIPGEIVK.A <a href="#">13239</a> <a href="#">13241</a> <a href="#">13251</a> <a href="#">13252</a> |
| <a href="#">15117</a> | 950.1915  | 2847.5527 | 2847.3498 | 0.2030  | 1    | 1     | 75      | 5    | R.VQFGGDEVVQAKDGAGSATLSMAYAGYR.F                                                                                   |
| <a href="#">15234</a> | 963.8635  | 2888.5687 | 2887.6066 | 0.9622  | 2    | 2     | 69      | 10   | K.DDGLKQALTGANIVVIPAGIPRKPGRMTR.D                                                                                  |
| <a href="#">16038</a> | 1095.8569 | 3284.5487 | 3281.6853 | 2.8634  | 0    | 85    | 2.8e-07 | 1    | K.TCPLVEELALYDVVNTPGVAADLSHISIAK.I <a href="#">16027</a> <a href="#">16035</a> <a href="#">16038</a>               |



16. [gi|220699482|gb|EED55821.1|](#) Mass: 39810 Score: 921 Queries matched: 77 emPAI: 1.82

fructose-bisphosphate aldolase, class II [Aspergillus flavus NRRL3357]

| Query                 | Observed  | Mr(expt)  | Mr(calc)  | Delta   | Miss | Score | Expect  | Rank | Peptide                                                                                                                             |
|-----------------------|-----------|-----------|-----------|---------|------|-------|---------|------|-------------------------------------------------------------------------------------------------------------------------------------|
| <a href="#">29</a>    | 651.5710  | 650.5637  | 650.3639  | 0.1998  | 0    | 24    | 0.61    | 1    | R.DYILK.K                                                                                                                           |
| <a href="#">350</a>   | 425.2716  | 848.5287  | 848.5120  | 0.0168  | 0    | 15    | 5.6     | 7    | K.LHPELLK.K                                                                                                                         |
| <a href="#">526</a>   | 454.6286  | 907.2427  | 906.5538  | 0.6889  | 2    | 12    | 12      | 4    | R.DYILKKK.D                                                                                                                         |
| <a href="#">707</a>   | 965.5100  | 964.5027  | 964.5229  | -0.0202 | 0    | 36    | 0.043   | 1    | K.EAISYGVVK.V <a href="#">708</a>                                                                                                   |
| <a href="#">774</a>   | 977.6210  | 976.6137  | 976.6069  | 0.0068  | 1    | 25    | 0.6     | 1    | K.LHPELLKK.H <a href="#">771</a> <a href="#">773</a> <a href="#">775</a> <a href="#">778</a>                                        |
| <a href="#">1815</a>  | 592.5971  | 1183.1797 | 1184.7241 | -1.5444 | 2    | 4     |         | 67   | M.GVGVLEKLSRK.T                                                                                                                     |
| <a href="#">2449</a>  | 1277.5660 | 1276.5587 | 1276.6299 | -0.0712 | 0    | 34    | 0.069   | 1    | K.VALEDFNTAGQL.- <a href="#">2454</a> <a href="#">2470</a>                                                                          |
| <a href="#">6581</a>  | 842.7691  | 1683.5237 | 1682.8515 | 0.6722  | 0    | 67    | 3.3e-05 | 1    | K.LLPWLDGLLDEDER.Y <a href="#">6558</a> <a href="#">6577</a> <a href="#">6579</a> <a href="#">6588</a> <a href="#">6609</a>         |
| <a href="#">6749</a>  | 849.3046  | 1696.5947 | 1694.8417 | 1.7530  | 0    | 80    | 1.3e-06 | 1    | K.DKPVFFVFHGGSGSSK.E <a href="#">6732</a> <a href="#">6738</a> <a href="#">6741</a> <a href="#">6743</a> <a href="#">6746</a>       |
| <a href="#">7983</a>  | 906.8221  | 1811.6297 | 1810.9465 | 0.6832  | 1    | 75    | 4.4e-06 | 1    | K.KLLPWLDDGLLDEDER.Y <a href="#">7980</a> <a href="#">7984</a> <a href="#">7985</a> <a href="#">7996</a> <a href="#">7998</a>       |
| <a href="#">8301</a>  | 924.5401  | 1847.0657 | 1845.8390 | 1.2268  | 0    | 14    | 5.1     | 1    | K.VNVDTDMQFAYMSGIR.D <a href="#">8291</a> <a href="#">8293</a> <a href="#">8295</a> <a href="#">8303</a> <a href="#">8311</a>       |
| <a href="#">8471</a>  | 932.5561  | 1863.0977 | 1861.8339 | 1.2638  | 0    | (0)   | 1.2e+02 | 1    | K.VNVDTDMQFAYMSGIR.D                                                                                                                |
| <a href="#">10097</a> | 1025.2926 | 2048.5707 | 2048.0513 | 0.5194  | 0    | 79    | 1.6e-06 | 1    | R.SLAPAYGIPVVLHTDCAK.K <a href="#">10098</a> <a href="#">10114</a>                                                                  |
| <a href="#">10545</a> | 702.2469  | 2103.7187 | 2105.0099 | -1.2912 | 1    | 3     |         | 72   | K.KDYLMTAVGNPEGEDKPNK.K                                                                                                             |
| <a href="#">10656</a> | 1061.8266 | 2121.6387 | 2121.0782 | 0.5605  | 1    | 21    | 0.96    | 1    | K.LLPWLDGLLDEDERYFK.L                                                                                                               |
| <a href="#">10938</a> | 720.1879  | 2157.5417 | 2155.0770 | 2.4647  | 0    | 4     | 54      | 5    | K.GVSNQGQASIAGGIAAAHYIR.S <a href="#">10936</a>                                                                                     |
| <a href="#">11509</a> | 1119.3656 | 2236.7167 | 2236.0947 | 0.6221  | 0    | 117   | 2.4e-10 | 1    | R.DQNCPIVLQLSQGAAYFAGK.G <a href="#">11492</a> <a href="#">11494</a> <a href="#">11497</a> <a href="#">11500</a> <a href="#">11</a> |
| <a href="#">11579</a> | 751.1779  | 2250.5117 | 2249.1732 | 1.3385  | 2    | 51    | 0.00096 | 1    | K.KLLPWLDDGLLDEDERYFK.L                                                                                                             |
| <a href="#">16072</a> | 1097.4349 | 3289.2827 | 3286.6582 | 2.6245  | 0    | 33    | 0.045   | 1    | R.LFEHAQQNNYAIPAVNVTSSSTVVASLEAAR.D <a href="#">16046</a> <a href="#">16052</a> <a href="#">16C</a>                                 |

17. [gi|220700638|gb|EED56976.1|](#) Mass: 44602 Score: 913 Queries matched: 61 emPAI: 1.92

malate dehydrogenase, NAD-dependent [Aspergillus flavus NRRL3357]

| Query                | Observed | Mr(expt)  | Mr(calc)  | Delta  | Miss | Score | Expect  | Rank | Peptide                                                                       |
|----------------------|----------|-----------|-----------|--------|------|-------|---------|------|-------------------------------------------------------------------------------|
| <a href="#">51</a>   | 339.9126 | 677.8107  | 677.3748  | 0.4359 | 0    | 26    | 0.48    | 1    | K.GIDFVK.A <a href="#">50</a>                                                 |
| <a href="#">244</a>  | 807.4900 | 806.4827  | 806.4208  | 0.0620 | 0    | 24    | 0.76    | 1    | R.MAESLLK.A                                                                   |
| <a href="#">349</a>  | 849.5340 | 848.5267  | 848.4756  | 0.0511 | 0    | 30    | 0.19    | 1    | R.FISQVQK.T <a href="#">348</a> <a href="#">350</a>                           |
| <a href="#">774</a>  | 977.6210 | 976.6137  | 976.5342  | 0.0796 | 0    | 23    | 0.93    | 2    | R.QSFNLLQK.R <a href="#">771</a>                                              |
| <a href="#">902</a>  | 502.0561 | 1002.0977 | 1001.5254 | 0.5723 | 1    | 25    | 0.57    | 1    | K.TRDELVNR.I                                                                  |
| <a href="#">1127</a> | 528.6741 | 1055.3337 | 1053.5091 | 1.8247 | 0    | 9     | 20      | 7    | R.AFSASASQASK.V                                                               |
| <a href="#">1320</a> | 546.6386 | 1091.2627 | 1090.5659 | 0.6968 | 0    | 41    | 0.016   | 1    | R.IQFGGDEVVK.A <a href="#">1313</a> <a href="#">1319</a> <a href="#">1325</a> |
| <a href="#">1432</a> | 557.5816 | 1113.1487 | 1112.5139 | 0.6349 | 0    | 64    | 6.5e-05 | 1    | K.DQGVDFVASK.V <a href="#">1425</a> <a href="#">1428</a>                      |
| <a href="#">1593</a> | 379.5369 | 1135.5887 | 1132.6353 | 2.9535 | 1    | 8     | 24      | 6    | R.QSFNLLQKR.A                                                                 |
| <a href="#">1795</a> | 589.8866 | 1177.7587 | 1177.6343 | 0.1245 | 0    | 96    | 4.2e-08 | 1    | R.VSELALYDIR.G <a href="#">1805</a>                                           |
| <a href="#">2003</a> | 610.6796 | 1219.3447 | 1218.6972 | 0.6475 | 0    | 72    | 1.1e-05 | 1    | R.LFGVTTLDVVR.A <a href="#">2004</a> <a href="#">2016</a>                     |
| <a href="#">2280</a> | 630.4476 | 1258.8807 | 1258.6955 | 0.1852 | 1    | 28    | 0.27    | 1    | K.LLEACLGLK.N                                                                 |
| <a href="#">2723</a> | 654.6866 | 1307.3587 | 1306.7609 | 0.5978 | 0    | 71    | 1.4e-05 | 1    | K.GSEIVLIPAGVPR.K <a href="#">2732</a> <a href="#">2733</a>                   |
| <a href="#">3264</a> | 682.9016 | 1363.7887 | 1363.6732 | 0.1155 | 0    | 52    | 0.001   | 1    | R.DDLFNTNASIVR.D <a href="#">3273</a> <a href="#">3278</a>                    |

|                       |                  |                  |                  |                |          |            |                |          |                                                                                                                                         |
|-----------------------|------------------|------------------|------------------|----------------|----------|------------|----------------|----------|-----------------------------------------------------------------------------------------------------------------------------------------|
| <a href="#">3364</a>  | 687.6541         | 1373.2937        | 1374.7177        | -1.4239        | 1        | 8          | 31             | 4        | R.MAESLLKAAQGEK.G                                                                                                                       |
| <a href="#">3942</a>  | <b>481.3919</b>  | <b>1441.1537</b> | <b>1442.7881</b> | <b>-1.6344</b> | <b>2</b> | <b>19</b>  | <b>1.9</b>     | <b>2</b> | <b>K.NIQKGIDFVKANP.-</b> <a href="#">3950</a>                                                                                           |
| <a href="#">4102</a>  | <b>730.6596</b>  | <b>1459.3047</b> | <b>1458.7718</b> | <b>0.5329</b>  | <b>0</b> | <b>77</b>  | <b>3.3e-06</b> | <b>1</b> | <b>K.ILPVGQVNAEYEEK.L</b> <a href="#">4104</a> <a href="#">4123</a>                                                                     |
| <a href="#">4172</a>  | 734.7001         | 1467.3857        | 1465.6653        | 1.7204         | 0        | (4)        | 58             | 3        | K.DGAGSATLSMAMAGAR.M                                                                                                                    |
| <a href="#">4310</a>  | <b>742.1826</b>  | <b>1482.3507</b> | <b>1481.6602</b> | <b>0.6905</b>  | <b>0</b> | <b>70</b>  | <b>1.6e-05</b> | <b>1</b> | <b>K.DGAGSATLSMAMAGAR.M</b> <a href="#">4312</a> <a href="#">4317</a> <a href="#">4320</a>                                              |
| <a href="#">4319</a>  | 742.6751         | 1483.3357        | 1481.6602        | 1.6755         | 0        | (6)        | 39             | 2        | K.DGAGSATLSMAMAGAR.M                                                                                                                    |
| <a href="#">4938</a>  | <b>776.1921</b>  | <b>1550.3697</b> | <b>1549.8028</b> | <b>0.5669</b>  | <b>0</b> | <b>64</b>  | <b>5.3e-05</b> | <b>1</b> | <b>K.GVVEPTFVDSPLYK.D</b> <a href="#">4956</a>                                                                                          |
| <a href="#">6753</a>  | <b>566.6849</b>  | <b>1697.0327</b> | <b>1696.7872</b> | <b>0.2455</b>  | <b>1</b> | <b>12</b>  | <b>8.7</b>     | <b>1</b> | <b>K.AKDGAGSATLSMAMAGAR.M</b> <a href="#">6736</a> <a href="#">6763</a>                                                                 |
| <a href="#">7598</a>  | <b>889.0126</b>  | <b>1776.0107</b> | <b>1776.0873</b> | <b>-0.0766</b> | <b>0</b> | <b>117</b> | <b>3.2e-10</b> | <b>1</b> | <b>K.VAVLGAAGGIGQPLSLLLK.L</b> <a href="#">7610</a> <a href="#">7611</a> <a href="#">7614</a> <a href="#">7618</a> <a href="#">7631</a> |
| <a href="#">8036</a>  | 606.4182         | 1816.2327        | 1816.9319        | -0.6992        | 1        | 11         | 12             | 3        | R.DELVNRIQFGGDEVVK.A                                                                                                                    |
| <a href="#">12971</a> | <b>818.3479</b>  | <b>2452.0217</b> | <b>2453.2076</b> | <b>-1.1859</b> | <b>2</b> | <b>6</b>   | <b>33</b>      | <b>1</b> | <b>K.AKDGAGSATLSMAMAGARMAESLLK.A</b>                                                                                                    |
| <a href="#">14864</a> | 924.7632         | 2771.2677        | 2769.3426        | 1.9252         | 2        | 0          | 1e+02          | 5        | R.IQFGGDEVVKAKDGAGSATLSMAMAGAR.M                                                                                                        |
| <a href="#">15037</a> | <b>943.7829</b>  | <b>2828.3267</b> | <b>2827.3737</b> | <b>0.9531</b>  | <b>0</b> | <b>18</b>  | <b>1.9</b>     | <b>1</b> | <b>R.GGPGVAADLSHINTNSTVSGYEATPSGLR.D</b> <a href="#">15046</a>                                                                          |
| <a href="#">15627</a> | 1534.1771        | 3066.3397        | 3065.6284        | 0.7113         | 0        | 70         | 1.1e-05        | 1        | K.AAAEASPEANILVISNPVNSTVPIVSEVFK.S <a href="#">15629</a>                                                                                |
| <a href="#">16270</a> | <b>1134.8129</b> | <b>3401.4167</b> | <b>3398.7318</b> | <b>2.6849</b>  | <b>0</b> | <b>17</b>  | <b>2</b>       | <b>1</b> | <b>K.TDPSNEAVTVVGGHSGVTIVPLLSQSSHPSIEGK.T</b>                                                                                           |

18. [gi|220698199|gb|EED54539.1|](#) Mass: 75100 Score: 898 Queries matched: 60 emPAI: 1.25

transketolase TktA [Aspergillus flavus NRRL3357]

| Query                 | Observed  | Mr(expt)  | Mr(calc)  | Delta   | Miss | Score | Expect  | Rank | Peptide                                                                                                        |
|-----------------------|-----------|-----------|-----------|---------|------|-------|---------|------|----------------------------------------------------------------------------------------------------------------|
| <a href="#">280</a>   | 826.5550  | 825.5477  | 825.4021  | 0.1456  | 0    | 30    | 0.14    | 1    | R.FGASGPYK.Q <a href="#">281</a>                                                                               |
| <a href="#">308</a>   | 835.3110  | 834.3037  | 833.3767  | 0.9271  | 0    | 28    | 0.35    | 1    | K.ADDAESVK.A                                                                                                   |
| <a href="#">505</a>   | 903.4750  | 902.4677  | 902.5073  | -0.0396 | 0    | 45    | 0.0065  | 1    | R.VLAVDATSK.A                                                                                                  |
| <a href="#">940</a>   | 508.8236  | 1015.6327 | 1015.5913 | 0.0414  | 1    | 45    | 0.006   | 1    | R.KLSEAVLEK.V <a href="#">941</a> <a href="#">953</a>                                                          |
| <a href="#">975</a>   | 513.1796  | 1024.3447 | 1023.5601 | 0.7846  | 0    | 25    | 0.5     | 1    | R.LTTTIGFGSK.L <a href="#">974</a>                                                                             |
| <a href="#">1342</a>  | 548.8046  | 1095.5947 | 1095.5601 | 0.0347  | 0    | 44    | 0.0057  | 1    | K.FEFTPAGISK.R <a href="#">1341</a> <a href="#">1344</a> <a href="#">1346</a>                                  |
| <a href="#">1361</a>  | 551.1846  | 1100.3547 | 1099.4678 | 0.8869  | 0    | (9)   | 21      | 3    | K.CAFTEDVMK.R                                                                                                  |
| <a href="#">1391</a>  | 554.1081  | 1106.2017 | 1107.6400 | -1.4383 | 0    | 3     | 77      | 7    | K.HTPSILALTR.Q                                                                                                 |
| <a href="#">1450</a>  | 559.0236  | 1116.0327 | 1115.4627 | 0.5700  | 0    | 30    | 0.19    | 1    | K.CAFTEDVMK.R                                                                                                  |
| <a href="#">1562</a>  | 567.1661  | 1132.3177 | 1131.5706 | 0.7471  | 1    | 3     | 91      | 10   | K.AIQECREVK.D                                                                                                  |
| <a href="#">1999</a>  | 610.1726  | 1218.3307 | 1217.5412 | 0.7896  | 0    | 64    | 7.1e-05 | 1    | K.DGDNDLEAIEK.A <a href="#">1995</a> <a href="#">2002</a>                                                      |
| <a href="#">2076</a>  | 617.3721  | 1232.7297 | 1233.5891 | -0.8593 | 0    | 29    | 0.22    | 1    | R.YAHEQFGLNR.F <a href="#">2080</a>                                                                            |
| <a href="#">2464</a>  | 639.6676  | 1277.3207 | 1276.6888 | 0.6319  | 0    | 64    | 7e-05   | 1    | K.LQGTGGVHGPNLK.A                                                                                              |
| <a href="#">5373</a>  | 797.1211  | 1592.2277 | 1591.8206 | 0.4072  | 0    | 52    | 0.0009  | 1    | M.GYTDLQLAINTIR.V <a href="#">5376</a> <a href="#">5393</a> <a href="#">5395</a>                               |
| <a href="#">5375</a>  | 797.1886  | 1592.3627 | 1591.8206 | 0.5422  | 0    | 43    | 0.008   | 1    | K.SLPTYKPTDSAVASR.K <a href="#">5380</a>                                                                       |
| <a href="#">7180</a>  | 870.4961  | 1738.9777 | 1738.8237 | 0.1541  | 0    | 66    | 3.2e-05 | 1    | R.VVSVPCFEVFDAQDK.D <a href="#">7186</a>                                                                       |
| <a href="#">7347</a>  | 878.2961  | 1754.5777 | 1753.9210 | 0.6567  | 0    | 78    | 2.5e-06 | 1    | R.QNLPQLENSIEAALK.G <a href="#">7353</a>                                                                       |
| <a href="#">7627</a>  | 890.2731  | 1778.5317 | 1777.7995 | 0.7323  | 0    | 58    | 0.00027 | 1    | K.FMNFNPQNPDWVNR.D <a href="#">7639</a>                                                                        |
| <a href="#">8352</a>  | 926.8301  | 1851.6457 | 1849.9363 | 1.7094  | 0    | 49    | 0.0018  | 1    | K.QSFVVPQQVVDLYHK.T <a href="#">8343</a> <a href="#">8344</a>                                                  |
| <a href="#">10253</a> | 1033.2141 | 2064.4137 | 2063.9337 | 0.4800  | 0    | 84    | 5.1e-07 | 1    | K.NAVDFQPPEYNIGDWSGR.Y <a href="#">10250</a>                                                                   |
| <a href="#">10852</a> | 1073.8886 | 2145.7627 | 2145.0089 | 0.7538  | 1    | 59    | 0.00017 | 1    | R.VVSVPCFEVFDAQDKDYK.L <a href="#">10822</a> <a href="#">10850</a> <a href="#">10858</a> <a href="#">10861</a> |

|                       |           |           |           |         |   |      |         |   |                                                                                              |
|-----------------------|-----------|-----------|-----------|---------|---|------|---------|---|----------------------------------------------------------------------------------------------|
| <a href="#">11131</a> | 729.8965  | 2186.6677 | 2186.0855 | 0.5822  | 0 | 4    | 49      | 2 | K.LGNLIAIYDDNHISIDGDTK.C <a href="#">11136</a>                                               |
| <a href="#">11449</a> | 1114.7696 | 2227.5247 | 2226.1355 | 1.3893  | 0 | 80   | 1.2e-06 | 1 | K.VLPDGIPVLSVEAASTMGWER.Y <a href="#">11440</a>                                              |
| <a href="#">11510</a> | 746.5862  | 2236.7367 | 2234.0725 | 2.6642  | 0 | 16   | 3       | 1 | K.ANSGHPGAPMGMAPVSHVLFNK.F                                                                   |
| <a href="#">11547</a> | 1122.4511 | 2242.8877 | 2242.1304 | 0.7574  | 0 | (41) | 0.009   | 1 | K.VLPDGIPVLSVEAASTMGWER.Y <a href="#">11545</a>                                              |
| <a href="#">11689</a> | 756.7762  | 2267.3067 | 2266.1553 | 1.1514  | 0 | 66   | 3.4e-05 | 1 | K.VHSVIPELLSGSADLTGSNNTR.W <a href="#">11687</a> <a href="#">11691</a> <a href="#">11693</a> |
| <a href="#">12172</a> | 777.4509  | 2329.3307 | 2331.1012 | -1.7705 | 2 | 4    | 47      | 7 | K.DGDNDLEAIEKAIQECREVK.D                                                                     |
| <a href="#">14314</a> | 887.8259  | 2660.4557 | 2658.2861 | 2.1697  | 1 | 1    | 87      | 2 | K.ENHNVVARVVSVPCEVFVDAQDK.D <a href="#">14300</a>                                            |
| <a href="#">15201</a> | 958.7222  | 2873.1447 | 2873.4997 | -0.3550 | 2 | 2    | 72      | 5 | K.DYKLVLPDGIPVLSVEAASTMGWER.Y                                                                |

19. [gi|220701504|gb|EED57842.1|](#) Mass: 57367 Score: 886 Queries matched: 61 emPAI: 1.73

phosphoglycerate mutase, 2,3-bisphosphoglycerate-independent [Aspergillus flavus NRRL3357]

| Query                 | Observed  | Mr(expt)  | Mr(calc)  | Delta   | Miss | Score | Expect  | Rank | Peptide                                                                                   |
|-----------------------|-----------|-----------|-----------|---------|------|-------|---------|------|-------------------------------------------------------------------------------------------|
| <a href="#">212</a>   | 787.1780  | 786.1707  | 786.3946  | -0.2238 | 0    | 22    | 1.3     | 1    | R.DMIPSPK.V                                                                               |
| <a href="#">969</a>   | 511.5556  | 1021.0967 | 1020.5128 | 0.5840  | 0    | 36    | 0.046   | 1    | K.VATYDLDPK.M <a href="#">970</a>                                                         |
| <a href="#">1493</a>  | 562.4141  | 1122.8137 | 1122.5743 | 0.2394  | 0    | 54    | 0.00064 | 1    | K.AIGVIYEACK.K                                                                            |
| <a href="#">1772</a>  | 588.3811  | 1174.7477 | 1174.6022 | 0.1455  | 0    | 45    | 0.0053  | 1    | R.SPKPDFPYPK.N <a href="#">1774</a> <a href="#">1776</a> <a href="#">1780</a>             |
| <a href="#">2362</a>  | 634.6681  | 1267.3217 | 1266.6278 | 0.6939  | 0    | (60)  | 0.00017 | 1    | K.YMQQLLDQTK.E <a href="#">2366</a>                                                       |
| <a href="#">2508</a>  | 642.5446  | 1283.0747 | 1282.6227 | 0.4520  | 0    | 62    | 0.0001  | 1    | K.YMQQLLDQTK.E <a href="#">2519</a>                                                       |
| <a href="#">2768</a>  | 657.5511  | 1313.0877 | 1312.7351 | 0.3527  | 0    | 77    | 3.6e-06 | 1    | K.EIGIGEIATVVGR.Y <a href="#">2779</a> <a href="#">2784</a>                               |
| <a href="#">2851</a>  | 661.8026  | 1321.5907 | 1321.6514 | -0.0607 | 0    | 64    | 6e-05   | 1    | R.EITQLLGDYDR.S <a href="#">2856</a> <a href="#">2865</a>                                 |
| <a href="#">2985</a>  | 669.1186  | 1336.2227 | 1335.6670 | 0.5557  | 0    | 58    | 0.00024 | 1    | K.YEAAIQVAATDK.A <a href="#">2989</a>                                                     |
| <a href="#">3473</a>  | 693.8611  | 1385.7077 | 1385.7878 | -0.0801 | 2    | 3     | 86      | 8    | R.IDQTLKKGELNK.V                                                                          |
| <a href="#">4060</a>  | 727.7561  | 1453.4977 | 1451.6358 | 1.8620  | 0    | 7     | 27      | 2    | K.DDDTLFFFNYS.S <a href="#">4053</a>                                                      |
| <a href="#">4362</a>  | 745.5871  | 1489.1597 | 1488.6944 | 0.4653  | 0    | 80    | 1.8e-06 | 1    | K.GIVSGEGEESDPVK.T <a href="#">4369</a>                                                   |
| <a href="#">5174</a>  | 525.5425  | 1573.6057 | 1573.7923 | -0.1865 | 1    | 4     | 55      | 8    | K.QFAGEVRDMIPSPK.V <a href="#">5163</a>                                                   |
| <a href="#">6241</a>  | 831.2531  | 1660.4917 | 1658.8490 | 1.6427  | 0    | 51    | 0.0012  | 1    | K.VPFIMANAPEGWSLK.K <a href="#">6262</a>                                                  |
| <a href="#">6475</a>  | 560.0692  | 1677.1857 | 1674.8439 | 2.3418  | 0    | (3)   | 71      | 6    | K.VPFIMANAPEGWSLK.K                                                                       |
| <a href="#">6498</a>  | 840.7491  | 1679.4837 | 1678.7991 | 0.6846  | 1    | 85    | 4.3e-07 | 1    | R.VKDDTLFFFNYS.S <a href="#">6505</a> <a href="#">6513</a> <a href="#">6520</a>           |
| <a href="#">7753</a>  | 895.2521  | 1788.4897 | 1788.8968 | -0.4071 | 1    | 7     | 29      | 3    | R.DMIPSPKVATYDLDPK.M <a href="#">7752</a>                                                 |
| <a href="#">8876</a>  | 636.1729  | 1905.4967 | 1906.9240 | -1.4273 | 2    | 4     | 60      | 2    | K.MSAEAVGQKMADRIAEGK.F                                                                    |
| <a href="#">10768</a> | 1069.9551 | 2137.8957 | 2136.9761 | 0.9196  | 0    | 87    | 2.4e-07 | 1    | K.FEFVMNNFAPPDMVGHTGK.Y <a href="#">10773</a> <a href="#">10782</a> <a href="#">10783</a> |
| <a href="#">10911</a> | 719.1502  | 2154.4287 | 2152.9711 | 1.4577  | 0    | (1)   | 96      | 2    | K.FEFVMNNFAPPDMVGHTGK.Y                                                                   |
| <a href="#">11056</a> | 725.6955  | 2174.0647 | 2176.0569 | -1.9922 | 1    | 2     | 85      | 7    | R.VEIAMKGIIVSGEGEESDPVK.T                                                                 |
| <a href="#">11651</a> | 754.3675  | 2260.0807 | 2258.0049 | 2.0758  | 0    | 3     | 62      | 3    | K.DGDAILAAETPFMSGFAEADSK.T <a href="#">11656</a>                                          |
| <a href="#">12368</a> | 790.1205  | 2367.3397 | 2366.1641 | 1.1756  | 1    | 23    | 0.63    | 1    | R.YEKDETDEFLKPIIVGGEER.R                                                                  |
| <a href="#">12410</a> | 791.6479  | 2371.9217 | 2370.1049 | 1.8168  | 1    | 50    | 0.0013  | 1    | R.KDGDAILAAETPFMSGFAEADSK.T <a href="#">12397</a>                                         |
| <a href="#">12469</a> | 794.5049  | 2380.4927 | 2381.1209 | -0.6282 | 0    | 4     | 45      | 1    | K.QGYVLFITADHGNAEEMLTEK.G <a href="#">12482</a>                                           |
| <a href="#">13372</a> | 835.7689  | 2504.2847 | 2505.2726 | -0.9879 | 1    | 3     | 62      | 1    | R.SPKPDFPYPKNIHITMTQYK.T                                                                  |
| <a href="#">13389</a> | 836.4572  | 2506.3497 | 2505.4431 | 0.9066  | 0    | 39    | 0.015   | 1    | R.LHLLGLVSDGGVHSNITHLIGLLK.V <a href="#">13384</a> <a href="#">13396</a>                  |
| <a href="#">14835</a> | 922.7792  | 2765.3157 | 2763.3367 | 1.9790  | 0    | 10    | 11      | 1    | K.TDYTFPVAFPQHMGNVLAEWLSK.K <a href="#">14834</a>                                         |

|                       |           |           |           |         |   |      |         |   |                                                                                  |
|-----------------------|-----------|-----------|-----------|---------|---|------|---------|---|----------------------------------------------------------------------------------|
| <a href="#">15977</a> | 1084.3735 | 3250.0987 | 3251.6418 | -1.5430 | 0 | (3)  | 51      | 3 | K.EGGVLGDVAPTFLAAMGIEQPEEMSGQNLLVK.A                                             |
| <a href="#">16011</a> | 1091.1765 | 3270.5077 | 3267.6367 | 2.8710  | 0 | 53   | 0.00047 | 1 | K.EGGVLGDVAPTFLAAMGIEQPEEMSGQNLLVK.A                                             |
| <a href="#">16035</a> | 1095.7792 | 3284.3157 | 3283.6316 | 0.6841  | 0 | (22) | 0.54    | 1 | K.EGGVLGDVAPTFLAAMGIEQPEEMSGQNLLVK.A <a href="#">16036</a> <a href="#">16039</a> |

20. [gi|220692651|gb|EED48997.1|](#) Mass: 50492 Score: 829 Queries matched: 65 empAI: 1.42

translation elongation factor EF-1 alpha subunit, putative [Aspergillus flavus NRRL3357]

| Query                 | Observed  | Mr(expt)  | Mr(calc)  | Delta   | Miss | Score | Expect  | Rank | Peptide                                                                                                                                                                               |
|-----------------------|-----------|-----------|-----------|---------|------|-------|---------|------|---------------------------------------------------------------------------------------------------------------------------------------------------------------------------------------|
| <a href="#">5</a>     | 610.4110  | 609.4037  | 609.3122  | 0.0915  | 0    | 19    | 1.3     | 1    | K.FQTSK.Y                                                                                                                                                                             |
| <a href="#">348</a>   | 425.1676  | 848.3207  | 848.4643  | -0.1436 | 0    | 20    | 1.8     | 4    | K.FAELLEK.I                                                                                                                                                                           |
| <a href="#">487</a>   | 898.5350  | 897.5277  | 897.5647  | -0.0370 | 0    | (44)  | 0.0059  | 1    | R.QLIVALNK.M <a href="#">488</a> <a href="#">489</a> <a href="#">492</a>                                                                                                              |
| <a href="#">557</a>   | 914.5170  | 913.5097  | 913.5597  | -0.0500 | 0    | 31    | 0.13    | 1    | R.QTVAVGVK.S <a href="#">555</a> <a href="#">560</a> <a href="#">561</a>                                                                                                              |
| <a href="#">762</a>   | 488.5776  | 975.1407  | 974.5437  | 0.5971  | 0    | 57    | 0.00035 | 1    | R.LPLQDVYK.I <a href="#">757</a> <a href="#">766</a>                                                                                                                                  |
| <a href="#">1125</a>  | 528.4101  | 1054.8057 | 1054.6135 | 0.1922  | 0    | 51    | 0.0012  | 1    | K.ISGIGTVPVGR.V <a href="#">1120</a> <a href="#">1122</a> <a href="#">1123</a>                                                                                                        |
| <a href="#">1596</a>  | 1137.6180 | 1136.6107 | 1135.5873 | 1.0234  | 1    | 13    | 7.7     | 2    | K.EAAELGKGSFK.Y <a href="#">1584</a> <a href="#">1587</a> <a href="#">1592</a>                                                                                                        |
| <a href="#">2142</a>  | 415.0975  | 1242.2707 | 1243.6884 | -1.4177 | 2    | 4     | 67      | 9    | R.RTGKSVEDKPK.F                                                                                                                                                                       |
| <a href="#">2874</a>  | 663.9151  | 1325.8157 | 1325.7456 | 0.0702  | 0    | 63    | 9.3e-05 | 1    | R.EHALLAFTLGVR.Q <a href="#">2881</a> <a href="#">2886</a> <a href="#">2887</a> <a href="#">2888</a> <a href="#">2889</a> <a href="#">2893</a> <a href="#">2899</a> <a href="#">2</a> |
| <a href="#">2955</a>  | 667.5621  | 1333.1097 | 1331.7231 | 1.3866  | 1    | 4     | 72      | 4    | R.DMRQTVAVGVK.S <a href="#">2932</a>                                                                                                                                                  |
| <a href="#">3171</a>  | 679.0961  | 1356.1777 | 1355.6834 | 0.4944  | 0    | 62    | 0.00011 | 1    | K.YEVTVIDAPGHR.D <a href="#">3177</a> <a href="#">3179</a> <a href="#">3182</a> <a href="#">3183</a> <a href="#">3193</a>                                                             |
| <a href="#">4972</a>  | 518.5735  | 1552.6987 | 1553.8606 | -1.1619 | 2    | 10    | 13      | 6    | K.GSFKYAVLTKL.S <a href="#">4975</a>                                                                                                                                                  |
| <a href="#">6958</a>  | 857.1516  | 1712.2887 | 1711.9144 | 0.3743  | 2    | 2     | 94      | 6    | R.YNEIVKETSNIKK.V                                                                                                                                                                     |
| <a href="#">11298</a> | 736.8465  | 2207.5177 | 2205.2997 | 2.2180  | 1    | 10    | 15      | 2    | R.EHALLAFTLGVRQLIVALNK.M                                                                                                                                                              |
| <a href="#">12011</a> | 770.7245  | 2309.1517 | 2308.1054 | 1.0463  | 0    | 4     | 46      | 2    | K.MIPSKPMCIVESFTDFPPLGR.F                                                                                                                                                             |
| <a href="#">12252</a> | 782.4152  | 2344.2237 | 2343.3162 | 0.9076  | 0    | 25    | 0.36    | 1    | K.TLLEAIDAIEPPVRPTDKPLR.L <a href="#">12250</a> <a href="#">12251</a>                                                                                                                 |
| <a href="#">13250</a> | 1244.4541 | 2486.8937 | 2486.3455 | 0.5483  | 0    | 65    | 3.8e-05 | 1    | R.VETGVKPGMVVTFAPANVTTEVK.S <a href="#">13249</a>                                                                                                                                     |
| <a href="#">13393</a> | 836.5032  | 2506.4877 | 2505.1819 | 1.3058  | 0    | (78)  | 1.7e-06 | 1    | K.SVEMHHQQLQAGNPGDNVGFNVK.N <a href="#">13390</a>                                                                                                                                     |
| <a href="#">13515</a> | 841.5909  | 2521.7507 | 2521.1768 | 0.5739  | 0    | 83    | 6.3e-07 | 1    | K.SVEMHHQQLQAGNPGDNVGFNVK.N <a href="#">13517</a> <a href="#">13529</a> <a href="#">13535</a>                                                                                         |
| <a href="#">15367</a> | 986.3659  | 2956.0757 | 2954.4365 | 1.6392  | 0    | 45    | 0.0034  | 1    | K.NMITGTSQADCAILLIASGTGEFEAGISK.D                                                                                                                                                     |
| <a href="#">15399</a> | 991.9489  | 2972.8247 | 2970.4314 | 2.3933  | 0    | (26)  | 0.27    | 1    | K.NMITGTSQADCAILLIASGTGEFEAGISK.D <a href="#">15397</a>                                                                                                                               |

21. [gi|220701397|gb|EED57735.1|](#) Mass: 32900 Score: 825 Queries matched: 32 empAI: 1.38

mitochondrial phosphate carrier (Mir1), putative [Aspergillus flavus NRRL3357]

| Query                | Observed | Mr(expt)  | Mr(calc)  | Delta   | Miss | Score | Expect  | Rank | Peptide                               |
|----------------------|----------|-----------|-----------|---------|------|-------|---------|------|---------------------------------------|
| <a href="#">179</a>  | 385.0241 | 768.0337  | 767.4218  | 0.6119  | 0    | 21    | 0.87    | 1    | K.FVVFEK.V                            |
| <a href="#">313</a>  | 837.4960 | 836.4887  | 836.4392  | 0.0495  | 0    | 16    | 3.7     | 1    | K.VSEAIYR.G                           |
| <a href="#">352</a>  | 851.4700 | 850.4627  | 850.4297  | 0.0330  | 0    | 20    | 1.6     | 1    | R.GSYAGIGAR.L                         |
| <a href="#">862</a>  | 498.0806 | 994.1467  | 993.4596  | 0.6871  | 0    | 50    | 0.0015  | 1    | K.FGGYEFFK.Q <a href="#">865</a>      |
| <a href="#">1434</a> | 557.6711 | 1113.3277 | 1113.6394 | -0.3116 | 0    | 20    | 1.5     | 2    | R.LLGATGGVEIGK.-                      |
| <a href="#">1829</a> | 594.0741 | 1186.1337 | 1185.5626 | 0.5711  | 0    | 57    | 0.00035 | 1    | K.TPGEPGEGTVSR.L                      |
| <a href="#">2361</a> | 634.6006 | 1267.1867 | 1266.6092 | 0.5775  | 1    | 65    | 5e-05   | 1    | R.GFDKETLSDGAK.T <a href="#">2363</a> |

|                       |           |           |           |         |   |    |         |   |                                                                                                                                                                        |
|-----------------------|-----------|-----------|-----------|---------|---|----|---------|---|------------------------------------------------------------------------------------------------------------------------------------------------------------------------|
| <a href="#">7043</a>  | 861.9651  | 1721.9157 | 1721.9352 | -0.0195 | 0 | 97 | 2.6e-08 | 1 | R.LVVSQPTFATGLLSGFGK.I <a href="#">7054</a> <a href="#">7055</a> <a href="#">7057</a> <a href="#">7059</a> <a href="#">7060</a> <a href="#">7064</a> <a href="#">7</a> |
| <a href="#">7894</a>  | 902.0281  | 1802.0417 | 1801.9039 | 0.1378  | 0 | 83 | 6.8e-07 | 1 | K.NEGVGAFYSGFGPILFK.Q <a href="#">7896</a> <a href="#">7899</a> <a href="#">7903</a> <a href="#">7913</a> <a href="#">7916</a> <a href="#">7920</a>                    |
| <a href="#">9862</a>  | 1014.2786 | 2026.5427 | 2026.0483 | 0.4944  | 0 | 88 | 1.9e-07 | 1 | K.AESPAPAAPQQLSGLALYSR.F <a href="#">9879</a>                                                                                                                          |
| <a href="#">11386</a> | 740.2789  | 2217.8147 | 2216.1664 | 1.6484  | 1 | 0  | 1.2e+02 | 1 | R.LFMVGTLTAGQFAIYGDIKR.L                                                                                                                                               |
| <a href="#">12262</a> | 1174.2366 | 2346.4587 | 2345.3835 | 1.0752  | 2 | 1  | 93      | 4 | R.IRLVSQPTFATGLLSGFGKILK.N                                                                                                                                             |
| <a href="#">12652</a> | 803.3442  | 2407.0107 | 2405.1872 | 1.8235  | 0 | 52 | 0.00077 | 1 | R.FAFAGAVCCSVTHGALTPVDVVK.T <a href="#">12648</a>                                                                                                                      |
| <a href="#">15193</a> | 957.7472  | 2870.2197 | 2868.4810 | 1.7387  | 0 | 50 | 0.0012  | 1 | R.QVIANEGAGALLTGFGPTAAGYFLQGAFF.F                                                                                                                                      |

22. [gi|220699514|gb|EED55853.1|](#) Mass: 43394 Score: 823 Queries matched: 21 emPAI: 0.67

aspartic endopeptidase Pep2 [Aspergillus flavus NRRL3357]

| Query                 | Observed  | Mr(expt)  | Mr(calc)  | Delta  | Miss | Score | Expect  | Rank | Peptide                                                                                                  |
|-----------------------|-----------|-----------|-----------|--------|------|-------|---------|------|----------------------------------------------------------------------------------------------------------|
| <a href="#">6044</a>  | 823.7296  | 1645.4447 | 1644.7995 | 0.6452 | 0    | 108   | 2.7e-09 | 1    | K.YSGSLSGFVSQDTLK.I <a href="#">6017</a>                                                                 |
| <a href="#">6735</a>  | 848.7581  | 1695.5017 | 1694.8880 | 0.6138 | 0    | 90    | 1.5e-07 | 1    | R.FDGILGLGFDTISVVK.I <a href="#">6738</a> <a href="#">6748</a> <a href="#">6750</a>                      |
| <a href="#">6958</a>  | 857.1516  | 1712.2887 | 1711.8570 | 0.4318 | 0    | 85    | 4.3e-07 | 1    | K.WYSVYDLGNGAVGLAK.A <a href="#">6957</a> <a href="#">6962</a> <a href="#">6964</a> <a href="#">6974</a> |
| <a href="#">10030</a> | 681.6645  | 2041.9717 | 2039.0840 | 2.8877 | 2    | 1     | 97      | 7    | R.KWYSVYDLGNGAVGLAKAK.-                                                                                  |
| <a href="#">11607</a> | 1127.6976 | 2253.3807 | 2253.1430 | 0.2377 | 1    | 112   | 8.7e-10 | 1    | K.VKDQLFAEATSEPGLAFVGR.F <a href="#">11611</a> <a href="#">11613</a> <a href="#">11622</a>               |
| <a href="#">12050</a> | 771.8735  | 2312.5987 | 2311.2933 | 1.3054 | 2    | 6     | 29      | 2    | M.KSTLVTVASVLLGCASAEVHKLK.L                                                                              |
| <a href="#">12892</a> | 813.7682  | 2438.2827 | 2438.1238 | 0.1589 | 1    | 64    | 4.3e-05 | 1    | K.EGDDSVATFGGVKDHVTGELVK.I <a href="#">12896</a>                                                         |
| <a href="#">15450</a> | 998.8435  | 2993.5087 | 2992.4059 | 1.1028 | 0    | 73    | 5.6e-06 | 1    | K.VVLDTGSSNLWVPSSECGSIACYLHVK.Y <a href="#">15451</a>                                                    |

23. [gi|220700072|gb|EED56411.1|](#) Mass: 54581 Score: 767 Queries matched: 53 emPAI: 2.04

6-phosphogluconate dehydrogenase Gnd1, putative [Aspergillus flavus NRRL3357]

| Query                | Observed | Mr(expt)  | Mr(calc)  | Delta   | Miss | Score | Expect  | Rank | Peptide                                                        |
|----------------------|----------|-----------|-----------|---------|------|-------|---------|------|----------------------------------------------------------------|
| <a href="#">351</a>  | 851.1480 | 850.1407  | 849.4232  | 0.7175  | 0    | 17    | 3.2     | 1    | R.FLENEAK.G                                                    |
| <a href="#">357</a>  | 426.9941 | 851.9737  | 851.4137  | 0.5600  | 0    | 7     | 31      | 9    | K.DITNAYR.Q                                                    |
| <a href="#">854</a>  | 497.1876 | 992.3607  | 991.5338  | 0.8269  | 0    | 47    | 0.0032  | 1    | K.DIFQSIAAK.S <a href="#">850</a> <a href="#">852</a>          |
| <a href="#">1430</a> | 557.5611 | 1113.1077 | 1112.5040 | 0.6038  | 0    | 37    | 0.034   | 1    | R.DYFGAHTFR.V <a href="#">1426</a>                             |
| <a href="#">2118</a> | 619.8206 | 1237.6267 | 1237.6779 | -0.0511 | 0    | 40    | 0.015   | 1    | R.DLPANLLQAQR.D <a href="#">2119</a>                           |
| <a href="#">2728</a> | 654.9316 | 1307.8487 | 1307.6106 | 0.2381  | 0    | 50    | 0.0017  | 1    | R.FVSGVSGGEGAR.Y <a href="#">2731</a>                          |
| <a href="#">2916</a> | 665.2116 | 1328.4087 | 1327.7434 | 0.6653  | 0    | 21    | 1.3     | 1    | K.LNKPSIALMWR.G                                                |
| <a href="#">3109</a> | 676.0666 | 1350.1187 | 1348.6147 | 1.5040  | 0    | 65    | 4.8e-05 | 1    | R.FNDDDGTPVLEK.I <a href="#">3090</a> <a href="#">3113</a>     |
| <a href="#">3242</a> | 682.0836 | 1362.1527 | 1361.7555 | 0.3973  | 0    | 85    | 4.7e-07 | 1    | K.GVLDSFLIEITR.D <a href="#">3249</a> <a href="#">3270</a>     |
| <a href="#">3982</a> | 723.6841 | 1445.3537 | 1444.7198 | 0.6339  | 0    | 67    | 3.4e-05 | 1    | R.QNPDLNLLFDK.F <a href="#">3978</a>                           |
| <a href="#">5434</a> | 800.3386 | 1598.6627 | 1597.7736 | 0.8891  | 0    | 48    | 0.0022  | 1    | R.VKPEHANETYPGK.D                                              |
| <a href="#">5541</a> | 804.1726 | 1606.3307 | 1603.7916 | 2.5391  | 0    | 71    | 1.3e-05 | 1    | R.GVGMPVNEIAEVFDK.W <a href="#">5515</a>                       |
| <a href="#">5655</a> | 808.3501 | 1614.6857 | 1614.8253 | -0.1396 | 0    | 45    | 0.0048  | 1    | R.ASSLLPGPTPQFTGDK.Q <a href="#">5663</a>                      |
| <a href="#">6764</a> | 850.1696 | 1698.3247 | 1696.8308 | 1.4939  | 0    | 29    | 0.2     | 1    | K.QAFVDDLEQALYASK.I <a href="#">6771</a>                       |
| <a href="#">7771</a> | 597.6359 | 1789.8857 | 1789.9727 | -0.0869 | 1    | 0     | 1.5e+02 | 6    | K.WNKGVLDSFLIEITR.D                                            |
| <a href="#">7872</a> | 901.2686 | 1800.5227 | 1799.8950 | 0.6278  | 0    | 90    | 1.3e-07 | 1    | K.IISYAQGFMLMQEAAK.E <a href="#">7880</a> <a href="#">7886</a> |



|                       |           |           |           |         |   |      |         |   |                                                                        |
|-----------------------|-----------|-----------|-----------|---------|---|------|---------|---|------------------------------------------------------------------------|
| <a href="#">8190</a>  | 917.4866  | 1832.9587 | 1831.8848 | 1.0739  | 0 | (3)  | 76      | 2 | K.IISYAQGFMLMQEAAK.E                                                   |
| <a href="#">9503</a>  | 662.5089  | 1984.5047 | 1984.0862 | 0.4185  | 1 | 5    | 47      | 4 | K.LNKPSIALMWRGGCIIR.S                                                  |
| <a href="#">9579</a>  | 665.2119  | 1992.6137 | 1991.0451 | 1.5687  | 1 | 9    | 18      | 1 | K.EYGWKLKPSIALMWR.G                                                    |
| <a href="#">9915</a>  | 678.6955  | 2033.0647 | 2032.0088 | 1.0559  | 1 | 30   | 0.13    | 1 | R.GVGMPVNEIAEVFDKWNK.G <a href="#">9913</a>                            |
| <a href="#">10112</a> | 684.4119  | 2050.2137 | 2048.0037 | 2.2100  | 1 | (6)  | 32      | 1 | R.GVGMPVNEIAEVFDKWNK.G <a href="#">10111</a>                           |
| <a href="#">11164</a> | 731.1565  | 2190.4477 | 2188.1099 | 2.3378  | 2 | 39   | 0.017   | 1 | K.RGVGMPVNEIAEVFDKWNK.G                                                |
| <a href="#">11436</a> | 742.7349  | 2225.1827 | 2224.8790 | 0.3037  | 0 | 32   | 0.075   | 1 | K.SEGEACCDWVGDEGAGHYVK.M <a href="#">11434</a>                         |
| <a href="#">11717</a> | 758.5542  | 2272.6407 | 2270.1655 | 2.4752  | 2 | 4    | 46      | 8 | K.DERVASSLLPGPTPQFTGDK.Q                                               |
| <a href="#">11754</a> | 1140.0351 | 2278.0557 | 2278.1229 | -0.0672 | 1 | 3    | 66      | 2 | K.DITNAYRQNPDLLENLLFDK.F                                               |
| <a href="#">12546</a> | 1195.9381 | 2389.8617 | 2389.1743 | 0.6874  | 0 | 81   | 9.2e-07 | 1 | K.GALWGIPTPAFSTALSFYDGYR.T <a href="#">12545</a> <a href="#">12548</a> |
| <a href="#">13203</a> | 827.9122  | 2480.7147 | 2479.1915 | 1.5232  | 1 | 1    | 1e+02   | 4 | K.IISYAQGFMLMQEAAKEYGWL.L                                              |
| <a href="#">13288</a> | 831.7119  | 2492.1137 | 2489.2988 | 2.8149  | 0 | 6    | 27      | 1 | K.WTAINALDLGMPVTLIGEAVFSR.C                                            |
| <a href="#">14060</a> | 871.6115  | 2611.8127 | 2611.2120 | 0.6007  | 0 | 36   | 0.029   | 1 | K.MVHNGIEYGDMQLICEAYDILK.R <a href="#">14049</a>                       |
| <a href="#">14126</a> | 877.4192  | 2629.2357 | 2627.2070 | 2.0288  | 0 | (21) | 0.88    | 1 | K.MVHNGIEYGDMQLICEAYDILK.R <a href="#">14123</a>                       |
| <a href="#">14841</a> | 923.4399  | 2767.2977 | 2767.3131 | -0.0154 | 1 | 1    | 93      | 9 | K.MVHNGIEYGDMQLICEAYDILKR.G                                            |

24. [gi|220689888|gb|EED46238.1|](#) Mass: 35645 Score: 753 Queries matched: 60 emPAI: 2.80

transaldolase [Aspergillus flavus NRRL3357]

| Query                 | Observed | Mr (expt) | Mr (calc) | Delta   | Miss | Score | Expect  | Rank | Peptide                                                                                                                                                                |
|-----------------------|----------|-----------|-----------|---------|------|-------|---------|------|------------------------------------------------------------------------------------------------------------------------------------------------------------------------|
| <a href="#">79</a>    | 694.5290 | 693.5217  | 693.4537  | 0.0680  | 0    | 25    | 0.44    | 1    | K.ALHIIK.L                                                                                                                                                             |
| <a href="#">207</a>   | 785.6930 | 784.6857  | 784.4555  | 0.2302  | 0    | 16    | 4.1     | 1    | K.AAQVLQR.D                                                                                                                                                            |
| <a href="#">453</a>   | 441.8861 | 881.7577  | 881.5586  | 0.1991  | 0    | 50    | 0.0015  | 1    | K.ILEIIPGK.V <a href="#">451</a> <a href="#">452</a> <a href="#">455</a>                                                                                               |
| <a href="#">624</a>   | 468.5576 | 935.1007  | 934.5124  | 0.5883  | 0    | 61    | 0.00014 | 1    | K.FAADAVTLK.D <a href="#">622</a> <a href="#">623</a> <a href="#">626</a>                                                                                              |
| <a href="#">1051</a>  | 522.0461 | 1042.0777 | 1041.6182 | 0.4595  | 2    | 12    | 9.5     | 8    | K.DILKQKVQA.-                                                                                                                                                          |
| <a href="#">2030</a>  | 613.4511 | 1224.8877 | 1223.6034 | 1.2843  | 0    | 62    | 9.2e-05 | 1    | R.LSFDTQASIDK.A <a href="#">2023</a> <a href="#">2024</a> <a href="#">2026</a> <a href="#">2034</a> <a href="#">2038</a>                                               |
| <a href="#">2136</a>  | 621.6846 | 1241.3547 | 1240.6088 | 0.7459  | 0    | 45    | 0.0055  | 1    | K.TYINDEALFR.F <a href="#">2145</a>                                                                                                                                    |
| <a href="#">2390</a>  | 636.5996 | 1271.1847 | 1270.6769 | 0.5079  | 0    | 45    | 0.0051  | 1    | K.LDAASATGLDIPK.K                                                                                                                                                      |
| <a href="#">2431</a>  | 638.7416 | 1275.4687 | 1274.6295 | 0.8392  | 0    | 58    | 0.00027 | 1    | K.SVQNIFNYK.K                                                                                                                                                          |
| <a href="#">3329</a>  | 686.2221 | 1370.4297 | 1368.7037 | 1.7260  | 1    | 54    | 0.00067 | 1    | K.KTYINDEALFR.F <a href="#">3330</a>                                                                                                                                   |
| <a href="#">3590</a>  | 700.3761 | 1398.7377 | 1398.7718 | -0.0341 | 1    | 97    | 2.8e-08 | 1    | K.KLDAASATGLDIPK.K <a href="#">3593</a> <a href="#">3600</a> <a href="#">3602</a> <a href="#">3608</a> <a href="#">3609</a> <a href="#">3610</a> <a href="#">3614</a>  |
| <a href="#">3624</a>  | 468.5575 | 1402.6507 | 1403.8024 | -1.1517 | 1    | 18    | 2.3     | 1    | K.FAADAVTLKDILK.Q <a href="#">3626</a> <a href="#">3653</a>                                                                                                            |
| <a href="#">3965</a>  | 722.7571 | 1443.4997 | 1442.6387 | 0.8610  | 0    | (27)  | 0.28    | 2    | R.FEFNEEAMAVEK.L <a href="#">3967</a> <a href="#">3977</a>                                                                                                             |
| <a href="#">4092</a>  | 729.9916 | 1457.9687 | 1458.6337 | -0.6649 | 0    | 33    | 0.086   | 1    | R.FEFNEEAMAVEK.L <a href="#">4096</a> <a href="#">4114</a>                                                                                                             |
| <a href="#">4698</a>  | 510.2132 | 1527.6177 | 1526.8668 | 0.7509  | 2    | 19    | 1.9     | 1    | K.KLDAASATGLDIPKK.T                                                                                                                                                    |
| <a href="#">7171</a>  | 870.2476 | 1738.4807 | 1736.8985 | 1.5823  | 0    | 85    | 4.4e-07 | 1    | K.KPEYAALIDAAVEYGK.Q <a href="#">7155</a> <a href="#">7157</a> <a href="#">7158</a> <a href="#">7161</a> <a href="#">7164</a> <a href="#">7166</a> <a href="#">717</a> |
| <a href="#">7684</a>  | 595.3995 | 1783.1767 | 1782.8497 | 0.3271  | 1    | 24    | 0.58    | 2    | K.QHGSNVDEKVDATLDR.L <a href="#">7686</a>                                                                                                                              |
| <a href="#">8994</a>  | 959.8036 | 1917.5927 | 1917.0207 | 0.5720  | 0    | 75    | 4.2e-06 | 1    | K.YKPQDATTPNSLILAASK.K <a href="#">8999</a> <a href="#">9003</a> <a href="#">9004</a>                                                                                  |
| <a href="#">11407</a> | 741.6042 | 2221.7907 | 2223.3103 | -1.5196 | 2    | 3     | 70      | 4    | R.VLIKIASTWEGIKAAQVLQR.D                                                                                                                                               |
| <a href="#">11553</a> | 748.8762 | 2243.6067 | 2242.0939 | 1.5128  | 2    | 6     | 29      | 3    | R.FEFNEEAMAVEKLRREGISK.F                                                                                                                                               |

25. [gi|220691704|gb|EED48052.1|](#) Mass: 79640 Score: 714 Queries matched: 57 emPAI: 0.76

molecular chaperone and allergen Mod-E/Hsp90/Hsp1 [Aspergillus flavus NRRL3357]

| Query                 | Observed  | Mr(expt)  | Mr(calc)  | Delta   | Miss | Score | Expect  | Rank | Peptide                                                                                             |
|-----------------------|-----------|-----------|-----------|---------|------|-------|---------|------|-----------------------------------------------------------------------------------------------------|
| <a href="#">69</a>    | 688.5100  | 687.5027  | 687.4167  | 0.0860  | 0    | 22    | 1.4     | 1    | K.LVDITK.D <a href="#">70</a>                                                                       |
| <a href="#">515</a>   | 454.0876  | 906.1607  | 905.4858  | 0.6749  | 0    | 40    | 0.018   | 1    | K.SPFLDSLK.Q <a href="#">525</a>                                                                    |
| <a href="#">976</a>   | 1025.3770 | 1024.3697 | 1024.4713 | -0.1016 | 0    | 40    | 0.016   | 1    | R.YESLSDPSK.L                                                                                       |
| <a href="#">992</a>   | 515.6901  | 1029.3657 | 1028.6593 | 0.7064  | 2    | 6     | 42      | 7    | K.SAIKELKK.K                                                                                        |
| <a href="#">1175</a>  | 534.2826  | 1066.5507 | 1066.5335 | 0.0172  | 0    | 7     | 29      | 2    | R.APFDLFETK.K                                                                                       |
| <a href="#">1382</a>  | 553.0941  | 1104.1737 | 1104.5047 | -0.3310 | 1    | 3     | 85      | 8    | K.KVEADGESDR.T <a href="#">1397</a> <a href="#">1398</a>                                            |
| <a href="#">2027</a>  | 613.0426  | 1224.0707 | 1222.6346 | 1.4361  | 1    | 28    | 0.27    | 1    | K.RAPFDLFETK.K <a href="#">2032</a>                                                                 |
| <a href="#">2380</a>  | 635.7876  | 1269.5607 | 1269.7041 | -0.1433 | 0    | 68    | 2.3e-05 | 1    | K.ADLINNLGTIAR.S <a href="#">2385</a>                                                               |
| <a href="#">2443</a>  | 639.2086  | 1276.4027 | 1274.6354 | 1.7673  | 0    | 67    | 3.2e-05 | 1    | R.ELISNASDALDK.I                                                                                    |
| <a href="#">2602</a>  | 647.6841  | 1293.3537 | 1293.6564 | -0.3027 | 1    | 14    | 7       | 2    | K.IRYESLSDPSK.L <a href="#">2598</a> <a href="#">2607</a> <a href="#">2611</a> <a href="#">2625</a> |
| <a href="#">3052</a>  | 672.6726  | 1343.3307 | 1342.7820 | 0.5487  | 2    | 10    | 19      | 3    | K.SLKNILGDKVEK.V                                                                                    |
| <a href="#">3102</a>  | 675.4611  | 1348.9077 | 1347.6572 | 1.2506  | 0    | 17    | 2.9     | 1    | K.HFSVEGQLEFR.A <a href="#">3096</a> <a href="#">3098</a> <a href="#">3103</a> <a href="#">3108</a> |
| <a href="#">3529</a>  | 696.7471  | 1391.4797 | 1391.7660 | -0.2863 | 2    | 11    | 13      | 2    | K.EFDGKLLVDITK.D                                                                                    |
| <a href="#">3908</a>  | 719.6901  | 1437.3657 | 1435.7194 | 1.6463  | 2    | 19    | 1.9     | 2    | R.EKEEKEFEGLAK.S                                                                                    |
| <a href="#">4548</a>  | 757.5611  | 1513.1077 | 1512.7784 | 0.3293  | 0    | 61    | 0.00012 | 1    | K.GVVDSEDLPLNLSR.E <a href="#">4550</a>                                                             |
| <a href="#">4696</a>  | 764.7591  | 1527.5037 | 1527.7053 | -0.2016 | 0    | 91    | 1.4e-07 | 1    | K.SGDEVTSLSDYVTR.M <a href="#">4704</a> <a href="#">4712</a>                                        |
| <a href="#">4890</a>  | 516.1799  | 1545.5177 | 1543.8205 | 1.6972  | 1    | 15    | 4.8     | 1    | R.ELISNASDALDKIR.Y                                                                                  |
| <a href="#">4946</a>  | 776.3451  | 1550.6757 | 1548.8987 | 1.7770  | 2    | 5     | 51      | 1    | R.OTLAKLLRYQSTK.S                                                                                   |
| <a href="#">5508</a>  | 535.4422  | 1603.3047 | 1600.7831 | 2.5216  | 1    | 7     | 30      | 8    | K.KPKIEEVDEEEK.K                                                                                    |
| <a href="#">7387</a>  | 880.6751  | 1759.3357 | 1758.8100 | 0.5257  | 0    | 91    | 1.2e-07 | 1    | R.NPADITQEEYAAFYK.S <a href="#">7393</a>                                                            |
| <a href="#">8292</a>  | 616.4815  | 1846.4227 | 1844.9825 | 1.4402  | 0    | 44    | 0.0052  | 1    | K.HSEFISYPIYLHVLK.E <a href="#">8290</a>                                                            |
| <a href="#">9454</a>  | 660.2895  | 1977.8467 | 1977.1194 | 0.7274  | 2    | 3     | 61      | 8    | K.VEKVVVSHKLVGSPCAIR.T                                                                              |
| <a href="#">10214</a> | 687.9979  | 2060.9717 | 2061.1443 | -0.1726 | 2    | 0     | 1.2e+02 | 8    | K.LGVHEDAQNRTLAKLLR.Y                                                                               |
| <a href="#">10412</a> | 1043.4156 | 2084.8167 | 2083.0109 | 1.8058  | 1    | 44    | 0.0048  | 1    | K.TLELFTEIAEDREQFDK.F <a href="#">10406</a> <a href="#">10415</a>                                   |
| <a href="#">10981</a> | 722.7192  | 2165.1357 | 2166.0119 | -0.8761 | 2    | 2     | 83      | 3    | R.IMKAQALRDTSMSSYSSK.K <a href="#">11017</a>                                                        |
| <a href="#">11423</a> | 1112.8391 | 2223.6637 | 2222.1511 | 1.5126  | 0    | 72    | 8.6e-06 | 1    | R.VFITDDATDLIPEWLSFIK.G <a href="#">11424</a>                                                       |
| <a href="#">11889</a> | 765.7875  | 2294.3407 | 2294.0485 | 0.2922  | 1    | 44    | 0.0055  | 1    | K.SGDEVTSLSDYVTRMPEHQK.Q <a href="#">11881</a> <a href="#">11883</a>                                |
| <a href="#">12167</a> | 777.3265  | 2328.9577 | 2326.1310 | 2.8267  | 2    | 4     | 49      | 4    | R.TGQFGWSANMERIMKAQALR.D                                                                            |
| <a href="#">12614</a> | 801.5082  | 2401.5027 | 2400.2253 | 1.2774  | 0    | 44    | 0.005   | 1    | K.NFEVLFLVDPIDFYAFTQLK.E <a href="#">12606</a>                                                      |
| <a href="#">12962</a> | 817.7152  | 2450.1237 | 2449.2675 | 0.8562  | 2    | 2     | 79      | 5    | R.MPEHQKQIYYITGESIKAVAK.S                                                                           |
| <a href="#">14169</a> | 880.8022  | 2639.3847 | 2641.3176 | -1.9329 | 1    | 51    | 0.00083 | 1    | K.TKPIWTRNPADITQEEYAAFYK.S                                                                          |

26. [gi|220693792|gb|EED50137.1|](#) Mass: 49527 Score: 697 Queries matched: 46 emPAI: 1.17

adenosylhomocysteinase [Aspergillus flavus NRRL3357]

| Query               | Observed | Mr(expt)  | Mr(calc)  | Delta  | Miss | Score | Expect | Rank | Peptide                          |
|---------------------|----------|-----------|-----------|--------|------|-------|--------|------|----------------------------------|
| <a href="#">433</a> | 875.2790 | 874.2717  | 873.4807  | 0.7910 | 0    | 24    | 0.78   | 1    | R.ESLIDGIK.R <a href="#">428</a> |
| <a href="#">896</a> | 501.6816 | 1001.3487 | 1000.4866 | 0.8622 | 0    | 7     | 36     | 2    | K.YVEFGTTGK.K                    |

|                       |           |           |           |         |   |      |         |    |                                                                                   |
|-----------------------|-----------|-----------|-----------|---------|---|------|---------|----|-----------------------------------------------------------------------------------|
| <a href="#">968</a>   | 511.5406  | 1021.0667 | 1020.6080 | 0.4587  | 0 | 47   | 0.0032  | 1  | R.HIILLAEGR.L <a href="#">971</a>                                                 |
| <a href="#">1357</a>  | 550.6911  | 1099.3677 | 1098.6801 | 0.6876  | 0 | 43   | 0.0092  | 1  | K.KPVGIVYVLPK.V <a href="#">1358</a>                                              |
| <a href="#">1466</a>  | 560.4696  | 1118.9247 | 1118.6084 | 0.3163  | 0 | 84   | 7.2e-07 | 1  | K.VADISLAAFGFR.R <a href="#">1465</a>                                             |
| <a href="#">1521</a>  | 565.0341  | 1128.0537 | 1128.5815 | -0.5278 | 1 | 3    | 98      | 5  | K.KYVEFGTTGK.K                                                                    |
| <a href="#">1560</a>  | 566.9986  | 1131.9827 | 1131.5672 | 0.4155  | 0 | 66   | 3.9e-05 | 1  | R.YAADQPLAGAR.I <a href="#">1563</a>                                              |
| <a href="#">1579</a>  | 568.1811  | 1134.3477 | 1133.6081 | 0.7396  | 0 | 70   | 1.6e-05 | 1  | K.VAVVAGYGDVVGK.G <a href="#">1575</a> <a href="#">1577</a>                       |
| <a href="#">2283</a>  | 630.6516  | 1259.2887 | 1257.5706 | 1.7181  | 0 | 11   | 15      | 2  | K.GCAQALHSMGAR.V                                                                  |
| <a href="#">2517</a>  | 428.9972  | 1283.9697 | 1282.6993 | 1.2704  | 0 | 12   | 11      | 1  | K.SVQNIKPQVDR.Y <a href="#">2516</a>                                              |
| <a href="#">4106</a>  | 487.5152  | 1459.5237 | 1458.7653 | 0.7584  | 1 | 9    | 19      | 4  | R.DILVGKHFVMR.N                                                                   |
| <a href="#">4307</a>  | 741.9836  | 1481.9527 | 1481.8453 | 0.1074  | 0 | 39   | 0.018   | 1  | K.LLVPAINVNDSVTK.S <a href="#">4303</a> <a href="#">4312</a> <a href="#">4314</a> |
| <a href="#">5366</a>  | 796.7346  | 1591.4547 | 1590.8188 | 0.6359  | 0 | 46   | 0.004   | 1  | K.AAPLGQIFVTTTGCR.D                                                               |
| <a href="#">8016</a>  | 908.2136  | 1814.4127 | 1813.9317 | 0.4810  | 0 | 103  | 7.8e-09 | 1  | R.EIELAEIEMPGLMAIR.R <a href="#">8028</a>                                         |
| <a href="#">8242</a>  | 614.5849  | 1840.7327 | 1841.9934 | -1.2607 | 1 | 3    | 79      | 4  | R.YLMANGRHIILLAEGR.L                                                              |
| <a href="#">8319</a>  | 617.2429  | 1848.7067 | 1845.9216 | 2.7852  | 0 | (1)  | 98      | 8  | R.EIELAEIEMPGLMAIR.R <a href="#">8302</a>                                         |
| <a href="#">8792</a>  | 633.6945  | 1898.0617 | 1898.9196 | -0.8579 | 1 | 2    | 87      | 10 | K.FDNLYGCRESLIDGIK.R                                                              |
| <a href="#">9116</a>  | 968.2661  | 1934.5177 | 1932.0350 | 2.4827  | 2 | 2    | 96      | 1  | R.ESLIDGIKRATDVMIAGK.V                                                            |
| <a href="#">9250</a>  | 651.7045  | 1952.0917 | 1951.0262 | 1.0655  | 0 | 55   | 0.0004  | 1  | K.LNLILDDGGDLTSLVHEK.Y <a href="#">9263</a>                                       |
| <a href="#">9529</a>  | 663.9152  | 1988.7237 | 1986.0278 | 2.6960  | 1 | 3    | 72      | 3  | R.EIELAEIEMPGLMAIRR.R                                                             |
| <a href="#">10374</a> | 694.5219  | 2080.5437 | 2079.1212 | 1.4226  | 1 | 81   | 1e-06   | 1  | K.KLNLILDDGGDLTSLVHEK.Y <a href="#">10383</a>                                     |
| <a href="#">10377</a> | 1041.3321 | 2080.6497 | 2081.1561 | -0.5064 | 1 | 1    | 97      | 1  | K.YVEFGTTGKKPVGIVYVLPK.V                                                          |
| <a href="#">10530</a> | 701.4692  | 2101.3857 | 2100.0938 | 1.2919  | 1 | 4    | 50      | 5  | - .MAAPAHQFKVADISLAAFGFR.R                                                        |
| <a href="#">10547</a> | 702.4392  | 2104.2957 | 2104.0847 | 0.2110  | 1 | 5    | 43      | 4  | K.SVQNIKPQVDRYLMANGR.H <a href="#">10557</a>                                      |
| <a href="#">10579</a> | 704.0982  | 2109.2727 | 2108.9473 | 0.3254  | 0 | 5    | 44      | 2  | K.DCYGLSEETTTGVHHLK.M                                                             |
| <a href="#">12273</a> | 1174.8021 | 2347.5897 | 2346.0110 | 1.5787  | 0 | 49   | 0.0014  | 1  | K.GETDEEYNWCLEQQLSAFK.D <a href="#">12274</a>                                     |
| <a href="#">15023</a> | 940.0735  | 2817.1987 | 2815.4677 | 1.7310  | 0 | 88   | 1.9e-07 | 1  | R.VLVTEIDPINALQAAVQGFVTTMEK.A                                                     |
| <a href="#">15031</a> | 943.0535  | 2826.1387 | 2825.4170 | 0.7217  | 1 | 2    | 65      | 1  | R.NDAIVCNIGHFDIEIDVAWLKANAK.S                                                     |
| <a href="#">15085</a> | 945.1589  | 2832.4547 | 2831.4627 | 0.9921  | 0 | (14) | 4.2     | 1  | R.VLVTEIDPINALQAAVQGFVTTMEK.A                                                     |

27. [gi|220690667|gb|EED47016.1|](#) Mass: 33878 Score: 675 Queries matched: 48 emPAI: 1.55

mitochondrial ADP,ATP carrier protein (Ant), putative [Aspergillus flavus NRRL3357]

| Query                | Observed | Mr(expt)  | Mr(calc)  | Delta   | Miss | Score | Expect  | Rank | Peptide                                                                                                                                                              |
|----------------------|----------|-----------|-----------|---------|------|-------|---------|------|----------------------------------------------------------------------------------------------------------------------------------------------------------------------|
| <a href="#">183</a>  | 771.5090 | 770.5017  | 770.4399  | 0.0619  | 0    | 18    | 2.5     | 1    | K.GAGANILR.G <a href="#">182</a>                                                                                                                                     |
| <a href="#">1392</a> | 554.1691 | 1106.3237 | 1105.4829 | 0.8409  | 0    | 61    | 0.00013 | 1    | K.YNSSFDAFR.Q <a href="#">1388</a> <a href="#">1390</a> <a href="#">1399</a> <a href="#">1403</a>                                                                    |
| <a href="#">1817</a> | 592.6811 | 1183.3477 | 1181.6081 | 1.7396  | 0    | 19    | 1.8     | 1    | R.QFNGLVDVYK.K                                                                                                                                                       |
| <a href="#">2100</a> | 618.8951 | 1235.7757 | 1235.6510 | 0.1247  | 0    | 94    | 5.6e-08 | 1    | K.TLASDGIAGLYR.G <a href="#">2099</a> <a href="#">2105</a>                                                                                                           |
| <a href="#">2178</a> | 624.2556 | 1246.4967 | 1246.6306 | -0.1339 | 0    | 68    | 2.5e-05 | 1    | R.TAASEGVASLWR.G <a href="#">2184</a>                                                                                                                                |
| <a href="#">2839</a> | 660.8641 | 1319.7137 | 1318.5798 | 1.1339  | 1    | 9     | 19      | 2    | R.KYNGIMDCFR.R <a href="#">2838</a>                                                                                                                                  |
| <a href="#">3260</a> | 682.7721 | 1363.5297 | 1362.7660 | 0.7637  | 0    | 67    | 2.9e-05 | 1    | R.GFGPSVLGIVVYR.G <a href="#">3248</a> <a href="#">3254</a> <a href="#">3257</a> <a href="#">3258</a> <a href="#">3261</a> <a href="#">3262</a> <a href="#">3265</a> |
| <a href="#">3275</a> | 683.3141 | 1364.6137 | 1363.7459 | 0.8678  | 1    | 23    | 0.78    | 1    | K.KTLASDGIAGLYR.G <a href="#">3256</a>                                                                                                                               |
| <a href="#">3353</a> | 687.1331 | 1372.2517 | 1371.7180 | 0.5337  | 0    | (50)  | 0.0018  | 1    | K.LLIQNQDEMLR.A <a href="#">3344</a>                                                                                                                                 |

|                       |           |           |           |         |   |     |         |   |                                |                                                                                                          |
|-----------------------|-----------|-----------|-----------|---------|---|-----|---------|---|--------------------------------|----------------------------------------------------------------------------------------------------------|
| <a href="#">3501</a>  | 695.4046  | 1388.7947 | 1387.7129 | 1.0818  | 0 | 61  | 0.00013 | 1 | K.LLIQNQDEMLR.A                | <a href="#">3488</a> <a href="#">3497</a> <a href="#">3498</a> <a href="#">3514</a> <a href="#">3518</a> |
| <a href="#">3570</a>  | 698.9916  | 1395.9687 | 1395.6785 | 0.2903  | 2 | 5   | 44      | 7 | R.RRMMMTSGEAVK.Y               |                                                                                                          |
| <a href="#">3683</a>  | 706.8776  | 1411.7407 | 1411.6734 | 0.0673  | 2 | (2) | 88      | 2 | R.RRMMMTSGEAVK.Y               |                                                                                                          |
| <a href="#">4230</a>  | 738.2771  | 1474.5397 | 1473.7405 | 0.7992  | 0 | 68  | 2.5e-05 | 1 | R.YFPTQALNFAFR.D               | <a href="#">4254</a> <a href="#">4261</a>                                                                |
| <a href="#">5851</a>  | 544.4619  | 1630.3637 | 1628.8919 | 1.4718  | 1 | 9   | 19      | 2 | R.IKLLIQNQDEMLR.A              |                                                                                                          |
| <a href="#">11031</a> | 724.5335  | 2170.5787 | 2170.9486 | -0.3698 | 1 | 4   | 52      | 8 | R.MMMTSGEAVKYNSSFDAFR.Q        |                                                                                                          |
| <a href="#">12186</a> | 778.7265  | 2333.1577 | 2335.1051 | -1.9474 | 0 | (0) | 1.2e+02 | 7 | K.SVFGMPGFVVDFMMGGVSAAVSK.T    |                                                                                                          |
| <a href="#">12202</a> | 1168.8791 | 2335.7437 | 2335.1051 | 0.6386  | 0 | 10  | 13      | 1 | K.SVFGMPGFVVDFMMGGVSAAVSK.T    |                                                                                                          |
| <a href="#">12253</a> | 782.4462  | 2344.3167 | 2343.0446 | 1.2721  | 2 | 3   | 65      | 1 | R.RMMMTSGEAVKYNSSFDAFR.Q       |                                                                                                          |
| <a href="#">13891</a> | 861.2025  | 2580.5857 | 2580.4064 | 0.1793  | 1 | 0   | 1.1e+02 | 9 | K.TLASDGIAGLYRGGFVPSVLGIVVYR.G |                                                                                                          |

28. [gi|220699036|gb|EED55375.1](#) Mass: 47366 Score: 672 Queries matched: 54 emPAI: 1.10

aspartate aminotransferase, putative [Aspergillus flavus NRRL3357]

| Query                 | Observed  | Mr(expt)  | Mr(calc)  | Delta   | Miss | Score | Expect  | Rank | Peptide                                                                                                                                                                |
|-----------------------|-----------|-----------|-----------|---------|------|-------|---------|------|------------------------------------------------------------------------------------------------------------------------------------------------------------------------|
| <a href="#">243</a>   | 807.3660  | 806.3587  | 806.4538  | -0.0951 | 0    | 33    | 0.095   | 1    | R.LAESIFK.V <a href="#">245</a>                                                                                                                                        |
| <a href="#">389</a>   | 431.7581  | 861.5017  | 860.4868  | 1.0149  | 0    | 59    | 0.00024 | 1    | R.IGGAFLQR.F                                                                                                                                                           |
| <a href="#">1165</a>  | 532.9896  | 1063.9647 | 1063.5914 | 0.3734  | 1    | 6     | 48      | 5    | R.LAESIFKVTG.-                                                                                                                                                         |
| <a href="#">1443</a>  | 558.6411  | 1115.2677 | 1114.6499 | 0.6179  | 0    | 19    | 2.2     | 1    | K.GKPYVLPVSR.A                                                                                                                                                         |
| <a href="#">1911</a>  | 602.7651  | 1203.5157 | 1202.6507 | 0.8651  | 0    | 70    | 1.8e-05 | 1    | R.ISVAGITSDNVK.R <a href="#">1903</a> <a href="#">1908</a>                                                                                                             |
| <a href="#">1932</a>  | 604.6996  | 1207.3847 | 1206.5849 | 0.7998  | 1    | 9     | 20      | 4    | K.GMADRIIEMR.S                                                                                                                                                         |
| <a href="#">2378</a>  | 635.6601  | 1269.3057 | 1269.7153 | -0.4096 | 1    | 14    | 5.7     | 2    | R.DANLRTVVVGAR.H <a href="#">2380</a>                                                                                                                                  |
| <a href="#">3313</a>  | 685.6696  | 1369.3247 | 1368.6925 | 0.6322  | 0    | 50    | 0.0016  | 1    | K.EYAGITGVPSFTK.A                                                                                                                                                      |
| <a href="#">3722</a>  | 709.1626  | 1416.3107 | 1414.8144 | 1.4963  | 0    | 48    | 0.0027  | 1    | R.LVITQISISGTGALR.I <a href="#">3706</a> <a href="#">3707</a> <a href="#">3709</a> <a href="#">3716</a> <a href="#">3718</a> <a href="#">3720</a> <a href="#">3721</a> |
| <a href="#">4966</a>  | 777.2346  | 1552.4547 | 1551.7239 | 0.7308  | 0    | 85    | 4.8e-07 | 1    | R.VGAFSLVCENAEK.K <a href="#">4961</a> <a href="#">4976</a> <a href="#">4984</a>                                                                                       |
| <a href="#">5726</a>  | 811.2751  | 1620.5357 | 1618.8454 | 1.6903  | 0    | 85    | 4.7e-07 | 1    | K.DTIGLDFEGLIADIK.A <a href="#">5699</a> <a href="#">5702</a> <a href="#">5718</a> <a href="#">5725</a> <a href="#">5729</a>                                           |
| <a href="#">6156</a>  | 827.6961  | 1653.3777 | 1654.9227 | -1.5450 | 2    | 2     | 99      | 2    | K.AASRDANLRTVVVGAR.H                                                                                                                                                   |
| <a href="#">6720</a>  | 565.6165  | 1693.8277 | 1691.8811 | 1.9467  | 2    | 2     | 93      | 9    | K.GMADRIIEMRSLLR.K                                                                                                                                                     |
| <a href="#">7380</a>  | 880.2941  | 1758.5737 | 1758.8829 | -0.3091 | 1    | 77    | 2.8e-06 | 1    | R.FDKEYAGITGVPSFTK.A <a href="#">7388</a> <a href="#">7389</a> <a href="#">7406</a>                                                                                    |
| <a href="#">7477</a>  | 884.3446  | 1766.6747 | 1766.9315 | -0.2568 | 2    | 3     | 79      | 7    | K.ADSFKEKINLGVGAYR.D                                                                                                                                                   |
| <a href="#">8034</a>  | 606.3842  | 1816.1307 | 1814.9850 | 1.1457  | 1    | 10    | 16      | 6    | K.EDRLVITQISISGTGALR.I <a href="#">8012</a> <a href="#">8039</a>                                                                                                       |
| <a href="#">8537</a>  | 624.7092  | 1871.1057 | 1869.9526 | 1.1531  | 0    | 11    | 10      | 1    | K.IYLPNPSWANHNAVFK.D <a href="#">8546</a>                                                                                                                              |
| <a href="#">9194</a>  | 649.4035  | 1945.1887 | 1943.9312 | 1.2575  | 0    | 39    | 0.019   | 1    | R.HFVSEGHNIALCQSFAN.N <a href="#">9193</a>                                                                                                                             |
| <a href="#">11710</a> | 1136.7686 | 2271.5227 | 2271.1205 | 0.4022  | 0    | 87    | 2.7e-07 | 1    | R.VASTIMNDPELNQOWLGEVK.G <a href="#">11712</a>                                                                                                                         |
| <a href="#">14316</a> | 887.8535  | 2660.5387 | 2662.4819 | -1.9432 | 2    | 4     | 49      | 5    | K.RVDSQVKILIRPFYSNPPIHGAR.V                                                                                                                                            |
| <a href="#">15099</a> | 947.1329  | 2838.3767 | 2837.2656 | 1.1111  | 1    | 6     | 26      | 1    | K.GHFAFFDMAYQGFASGNADKDAFAPR.H                                                                                                                                         |
| <a href="#">15847</a> | 1060.1672 | 3177.4797 | 3174.5267 | 2.9531  | 0    | 16    | 2.4     | 1    | K.HDWSHITSQIGMFAYTGLKPEQMDALAK.E                                                                                                                                       |
| <a href="#">15984</a> | 1085.6959 | 3254.0657 | 3253.4961 | 0.5696  | 2    | 2     | 62      | 8    | R.QISDVMKQKGFHFAFFDMAYQGFASGNADK.D <a href="#">15982</a>                                                                                                               |

29. [gi|220689985|gb|EED46335.1](#) Mass: 71678 Score: 666 Queries matched: 45 emPAI: 0.25

succinate dehydrogenase subunit Sdh1, putative [Aspergillus flavus NRRL3357]

| Query                 | Observed  | Mr(expt)  | Mr(calc)  | Delta   | Miss | Score | Expect  | Rank | Peptide                                                                                                                                              |
|-----------------------|-----------|-----------|-----------|---------|------|-------|---------|------|------------------------------------------------------------------------------------------------------------------------------------------------------|
| <a href="#">279</a>   | 412.9696  | 823.9247  | 823.4777  | 0.4471  | 1    | 9     | 18      | 7    | R.AVSHRVR.D                                                                                                                                          |
| <a href="#">1972</a>  | 607.6621  | 1213.3097 | 1212.5961 | 0.7136  | 1    | 7     | 33      | 2    | R.FMERYAPTAK.D                                                                                                                                       |
| <a href="#">2513</a>  | 642.7071  | 1283.3997 | 1282.7146 | 0.6851  | 1    | 7     | 30      | 3    | K.KPHGKIDLGYR.A                                                                                                                                      |
| <a href="#">2527</a>  | 643.5826  | 1285.1507 | 1285.5799 | -0.4292 | 1    | 5     | 45      | 5    | R.GAHAREDYPPDR.D                                                                                                                                     |
| <a href="#">2780</a>  | 658.1576  | 1314.3007 | 1313.5710 | 0.7297  | 0    | 39    | 0.019   | 1    | R.ELEGYGCPFSR.T <a href="#">2778</a>                                                                                                                 |
| <a href="#">3013</a>  | 670.7451  | 1339.4757 | 1338.6793 | 0.7964  | 0    | 24    | 0.59    | 1    | K.AHHTVLATGGYGR.A                                                                                                                                    |
| <a href="#">3346</a>  | 458.1892  | 1371.5457 | 1368.8201 | 2.7256  | 2    | 16    |         | 4    | R.SLAPASKISRALR.D <a href="#">3338</a>                                                                                                               |
| <a href="#">4214</a>  | 737.7876  | 1473.5607 | 1472.8351 | 0.7256  | 0    | 93    | 8.4e-08 | 1    | R.LGANSLLDLVVFGR.A <a href="#">4220</a> <a href="#">4222</a> <a href="#">4227</a> <a href="#">4231</a> <a href="#">4241</a> <a href="#">4244</a>     |
| <a href="#">6242</a>  | 831.2621  | 1660.5097 | 1659.8917 | 0.6180  | 2    | 7     |         | 34   | R.DQRRSSTRPAAR.I <a href="#">6239</a>                                                                                                                |
| <a href="#">6434</a>  | 837.9396  | 1673.8647 | 1673.8519 | 0.0128  | 0    | 117   | 2.9e-10 | 1    | R.NLLTCATQTAVAAANR.K <a href="#">6456</a>                                                                                                            |
| <a href="#">7085</a>  | 863.8211  | 1725.6277 | 1724.8338 | 0.7939  | 1    | 11    |         | 11   | R.NAMQKAMQTDVSVFR.T <a href="#">7084</a>                                                                                                             |
| <a href="#">7359</a>  | 586.2585  | 1755.7537 | 1756.8236 | -1.0699 | 1    | (3)   |         | 67   | R.NAMQKAMQTDVSVFR.T                                                                                                                                  |
| <a href="#">7921</a>  | 903.3841  | 1804.7537 | 1803.9618 | 0.7919  | 0    | 103   | 7.7e-09 | 1    | R.LPGISETASIFAGVDVTK.Q <a href="#">7908</a> <a href="#">7913</a> <a href="#">7917</a> <a href="#">7918</a> <a href="#">7919</a> <a href="#">7922</a> |
| <a href="#">8478</a>  | 622.3599  | 1864.0577 | 1863.8210 | 0.2367  | 0    | 21    |         | 1.1  | K.GSDWLGQDAIHMYTR.E                                                                                                                                  |
| <a href="#">9534</a>  | 995.7456  | 1989.4767 | 1989.0908 | 0.3859  | 1    | 13    |         | 6.2  | R.LFSSTRPAARIFGSNPLR.A <a href="#">9532</a>                                                                                                          |
| <a href="#">11050</a> | 1087.4826 | 2172.9507 | 2171.1011 | 1.8496  | 0    | 2     |         | 80   | K.YPIIDHEYDAVVVGAGGAGLR.A                                                                                                                            |
| <a href="#">13270</a> | 830.7865  | 2489.3377 | 2491.2190 | -1.8813 | 2    | 4     |         | 50   | R.ELSSDAGAQSISKDLDFARTADGPK.S                                                                                                                        |
| <a href="#">15968</a> | 1083.2042 | 3246.5907 | 3246.5768 | 0.0139  | 0    | 60    | 8.3e-05 | 1    | R.AGLPNQDLEFVQFHPTGIYAGCLITEGSR.G <a href="#">15972</a> <a href="#">15974</a>                                                                        |

30. [gi|220691583|gb|EED47931.1|](#) Mass: 40278 Score: 656 Queries matched: 57 emPAI: 4.67

60S ribosomal protein L4, putative [Aspergillus flavus NRRL3357]

| Query                | Observed  | Mr(expt)  | Mr(calc)  | Delta   | Miss | Score | Expect  | Rank | Peptide                                                                                       |
|----------------------|-----------|-----------|-----------|---------|------|-------|---------|------|-----------------------------------------------------------------------------------------------|
| <a href="#">75</a>   | 690.6440  | 689.6367  | 687.4391  | 2.1976  | 2    | 9     |         | 28   | K.VAKSRK.M                                                                                    |
| <a href="#">97</a>   | 358.5641  | 715.1137  | 714.4640  | 0.6498  | 0    | 51    | 0.0016  | 1    | K.AAVTLLK.A <a href="#">95</a> <a href="#">100</a> <a href="#">101</a>                        |
| <a href="#">676</a>  | 479.8676  | 957.7207  | 957.5131  | 0.2076  | 0    | 44    | 0.008   | 1    | K.ALGAGDDLK.V <a href="#">669</a> <a href="#">673</a> <a href="#">675</a>                     |
| <a href="#">860</a>  | 497.8271  | 993.6397  | 993.5131  | 0.1266  | 0    | 51    | 0.0011  | 1    | K.TFENAALTK.T <a href="#">858</a> <a href="#">859</a> <a href="#">863</a> <a href="#">864</a> |
| <a href="#">1258</a> | 541.2386  | 1080.4627 | 1080.5604 | -0.0976 | 0    | 44    | 0.0059  | 1    | R.LNPYAAAFSK.E <a href="#">1249</a> <a href="#">1260</a> <a href="#">1264</a>                 |
| <a href="#">1306</a> | 545.5886  | 1089.1627 | 1088.5138 | 0.6489  | 0    | 33    | 0.094   | 1    | K.EFLSTLHEN.- <a href="#">1304</a> <a href="#">1318</a>                                       |
| <a href="#">1794</a> | 1178.7510 | 1177.7437 | 1178.5251 | -0.7814 | 0    | 0     | 1.6e+02 | 4    | R.AGQAAFQGNQCR.S                                                                              |
| <a href="#">3213</a> | 680.9226  | 1359.8307 | 1357.7565 | 2.0742  | 0    | 37    | 0.034   | 2    | R.LINSSEIQSVLR.A <a href="#">3203</a>                                                         |
| <a href="#">3475</a> | 694.0886  | 1386.1627 | 1385.7191 | 0.4436  | 0    | 53    | 0.00082 | 1    | R.GPLVVYNPEVDGK.E                                                                             |
| <a href="#">3785</a> | 713.6656  | 1425.3167 | 1424.7446 | 0.5721  | 0    | 50    | 0.0015  | 1    | R.LDVVQVHTGMAK.N <a href="#">3790</a>                                                         |
| <a href="#">3908</a> | 719.6901  | 1437.3657 | 1435.6328 | 1.7329  | 0    | 86    | 3.5e-07 | 1    | K.AGEQTSAESWTGR.A                                                                             |
| <a href="#">3940</a> | 721.5381  | 1441.0617 | 1440.7395 | 0.3222  | 0    | (41)  | 0.012   | 1    | R.LDVVQVHTGMAK.N <a href="#">3941</a> <a href="#">3942</a> <a href="#">3950</a>               |
| <a href="#">4057</a> | 727.6941  | 1453.3737 | 1450.7503 | 2.6234  | 2    | 1     | 1.3e+02 | 6    | R.SGRMFAPTKVWR.K                                                                              |
| <a href="#">4290</a> | 740.7336  | 1479.4527 | 1478.8344 | 0.6183  | 0    | 57    | 0.00032 | 1    | R.VANVPEVPLVVESK.T <a href="#">4287</a> <a href="#">4301</a> <a href="#">4302</a>             |
| <a href="#">4836</a> | 771.8241  | 1541.6337 | 1541.8202 | -0.1865 | 1    | 50    | 0.0016  | 1    | R.RGPLVVYNPEVDGK.E <a href="#">4850</a> <a href="#">4853</a>                                  |
| <a href="#">6346</a> | 557.3169  | 1668.9287 | 1666.8825 | 2.0462  | 1    | 4     |         | 57   | R.LDVVQVHTGMAKNK.R <a href="#">6361</a>                                                       |



|                       |           |           |           |         |   |    |         |   |                                                                                                    |
|-----------------------|-----------|-----------|-----------|---------|---|----|---------|---|----------------------------------------------------------------------------------------------------|
| <a href="#">7553</a>  | 887.2426  | 1772.4707 | 1770.9264 | 1.5443  | 0 | 82 | 8.6e-07 | 1 | K.DYLLPQNVVANADLAR.L <a href="#">7544</a>                                                          |
| <a href="#">8149</a>  | 914.6886  | 1827.3627 | 1825.9799 | 1.3828  | 2 | 8  | 23      | 3 | R.QRRGPLVVYNPEVDGK.E                                                                               |
| <a href="#">8482</a>  | 622.4985  | 1864.4737 | 1863.0254 | 1.4483  | 0 | 55 | 0.00047 | 1 | R.FATASALAASSVPALLFAR.G <a href="#">8483</a>                                                       |
| <a href="#">8623</a>  | 628.6299  | 1882.8677 | 1883.1091 | -0.2414 | 2 | 6  | 32      | 2 | K.TKAAVTLKALGAGDDLK.V                                                                              |
| <a href="#">8842</a>  | 635.0112  | 1902.0117 | 1899.0214 | 2.9903  | 1 | 1  | 1.1e+02 | 9 | K.KDYLLPQNVVANADLAR.L                                                                              |
| <a href="#">14390</a> | 1336.4381 | 2670.8617 | 2669.4653 | 1.3964  | 0 | 77 | 2.2e-06 | 1 | R.NIPGVETSPVFALNLLQLAPGGHLGR.F <a href="#">14386</a> <a href="#">14394</a> <a href="#">14399</a>   |
| <a href="#">15080</a> | 944.4912  | 2830.4517 | 2828.4385 | 2.0132  | 1 | 5  | 35      | 2 | R.FVVVWTSSAFEALDQVFGSGSSPAALKK.D <a href="#">15060</a> <a href="#">15063</a> <a href="#">15068</a> |

31. [gi|220698900|gb|EED55239.1|](#) Mass: 36449 Score: 653 Queries matched: 69 emPAI: 1.84

glyceraldehyde 3-phosphate dehydrogenase GpdA [Aspergillus flavus NRRL3357]

| Query                 | Observed  | Mr(expt)  | Mr(calc)  | Delta   | Miss | Score | Expect  | Rank | Peptide                                                                                                                 |
|-----------------------|-----------|-----------|-----------|---------|------|-------|---------|------|-------------------------------------------------------------------------------------------------------------------------|
| <a href="#">275</a>   | 410.7816  | 819.5487  | 818.4399  | 1.1088  | 0    | 18    | 3.1     | 2    | K.VGINGFGR.I <a href="#">276</a>                                                                                        |
| <a href="#">288</a>   | 414.9126  | 827.8107  | 826.4912  | 1.3195  | 0    | 3     | 87      | 8    | K.VIPSLNGK.L                                                                                                            |
| <a href="#">1473</a>  | 561.0271  | 1120.0397 | 1119.6539 | 0.3858  | 0    | 64    | 7.5e-05 | 1    | R.VVDLIAYISK.V                                                                                                          |
| <a href="#">1959</a>  | 606.8806  | 1211.7467 | 1211.6662 | 0.0805  | 0    | 54    | 0.00054 | 1    | K.AGIALNEHFIK.L <a href="#">1965</a> <a href="#">1974</a>                                                               |
| <a href="#">2444</a>  | 639.2181  | 1276.4217 | 1275.7551 | 0.6667  | 1    | 43    | 0.0085  | 1    | R.RVVDLIAYISK.V <a href="#">2436</a> <a href="#">2441</a> <a href="#">2450</a>                                          |
| <a href="#">2616</a>  | 648.4811  | 1294.9477 | 1295.6609 | -0.7131 | 1    | 5     | 51      | 4    | R.TEKAVTYEDIK.K <a href="#">2617</a>                                                                                    |
| <a href="#">3096</a>  | 675.2066  | 1348.3987 | 1346.7129 | 1.6858  | 1    | 4     | 66      | 3    | -.MATPKVGINGFGR.I                                                                                                       |
| <a href="#">3816</a>  | 477.2295  | 1428.6667 | 1428.7572 | -0.0905 | 0    | 3     | 74      | 9    | R.TAAQNIIPSSTGAAK.A                                                                                                     |
| <a href="#">4716</a>  | 765.8826  | 1529.7507 | 1529.7872 | -0.0365 | 0    | 78    | 2.4e-06 | 1    | R.VPTANVSVVDLTCR.T <a href="#">4720</a> <a href="#">4722</a> <a href="#">4728</a>                                       |
| <a href="#">5516</a>  | 535.6415  | 1603.9027 | 1602.8586 | 1.0442  | 1    | 9     | 20      | 2    | K.VIPSLNGKLTGMSMR.V <a href="#">5513</a>                                                                                |
| <a href="#">6440</a>  | 838.1911  | 1674.3677 | 1673.7474 | 0.6203  | 0    | 69    | 2e-05   | 1    | K.LVSWYDNEWGYSR.R <a href="#">6443</a> <a href="#">6445</a> <a href="#">6454</a>                                        |
| <a href="#">8801</a>  | 950.3241  | 1898.6337 | 1896.9469 | 1.6868  | 0    | 1     | 98      | 1    | R.FQGTIETYEGLIVNGK.K                                                                                                    |
| <a href="#">9426</a>  | 659.2422  | 1974.7047 | 1974.0754 | 0.6293  | 2    | 5     | 47      | 2    | K.AVGKVIPSLNGKLTGMSMR.V <a href="#">9416</a>                                                                            |
| <a href="#">9559</a>  | 664.7742  | 1991.3007 | 1990.0703 | 1.2304  | 2    | (3)   | 76      | 4    | K.AVGKVIPSLNGKLTGMSMR.V <a href="#">9577</a>                                                                            |
| <a href="#">9868</a>  | 676.6395  | 2026.8967 | 2025.0419 | 1.8549  | 1    | 1     | 1.1e+02 | 4    | R.FQGTIETYEGLIVNGK.K                                                                                                    |
| <a href="#">10207</a> | 1031.2881 | 2060.5617 | 2060.0435 | 0.5183  | 0    | 91    | 1.2e-07 | 1    | K.VIISAPSADAPMFVGMVNNK.E <a href="#">10213</a> <a href="#">10215</a> <a href="#">10222</a>                              |
| <a href="#">10342</a> | 693.4255  | 2077.2547 | 2076.0384 | 1.2163  | 0    | (6)   | 34      | 2    | K.VIISAPSADAPMFVGMVNNK.E <a href="#">10349</a>                                                                          |
| <a href="#">10456</a> | 698.3402  | 2091.9987 | 2092.0333 | -0.0346 | 0    | (5)   | 39      | 1    | K.VIISAPSADAPMFVGMVNNK.E                                                                                                |
| <a href="#">11406</a> | 741.5292  | 2221.5657 | 2220.1283 | 1.4375  | 1    | 44    | 0.0049  | 1    | K.KVIISAPSADAPMFVGMVNNK.E <a href="#">11409</a>                                                                         |
| <a href="#">13313</a> | 832.8979  | 2495.6717 | 2496.2392 | -0.5675 | 1    | (2)   | 79      | 3    | K.VIISAPSADAPMFVGMVNNKEYK.T                                                                                             |
| <a href="#">13458</a> | 838.8202  | 2513.4387 | 2512.2342 | 1.2046  | 1    | 5     | 35      | 1    | K.VIISAPSADAPMFVGMVNNKEYK.T                                                                                             |
| <a href="#">14163</a> | 880.5125  | 2638.5157 | 2637.3109 | 1.2049  | 0    | 74    | 5.2e-06 | 1    | K.VINDNFGLVEGLMTTVHSHSYTATQK.T <a href="#">14164</a> <a href="#">14167</a> <a href="#">14172</a> <a href="#">14177</a>  |
| <a href="#">14258</a> | 886.0669  | 2655.1787 | 2653.3058 | 1.8729  | 0    | (28)  | 0.17    | 1    | K.VINDNFGLVEGLMTTVHSHSYTATQK.T <a href="#">14259</a> <a href="#">14264</a>                                              |
| <a href="#">15142</a> | 951.9865  | 2852.9377 | 2851.3764 | 1.5614  | 0    | 52    | 0.00069 | 1    | K.GILGYTEDDIVSTDLIGDAHSSIFDAK.A <a href="#">15134</a> <a href="#">15135</a> <a href="#">15141</a> <a href="#">15142</a> |
| <a href="#">15494</a> | 1008.9015 | 3023.6827 | 3022.4746 | 1.2081  | 0    | 19    | 1.3     | 1    | R.NAIASGDVVDVAVNDPFIETHYAYMLK.Y                                                                                         |
| <a href="#">15526</a> | 1519.9371 | 3037.8597 | 3038.4695 | -0.6098 | 0    | (11)  | 8.3     | 1    | R.NAIASGDVVDVAVNDPFIETHYAYMLK.Y                                                                                         |

32. [gi|220692490|gb|EED48836.1|](#) Mass: 232514 Score: 630 Queries matched: 68 emPAI: 0.23

fatty acid synthase beta subunit, putative [Aspergillus flavus NRRL3357]

| Query                 | Observed         | Mr(expt)         | Mr(calc)         | Delta          | Miss | Score     | Expect         | Rank     | Peptide                                                                                                                  |
|-----------------------|------------------|------------------|------------------|----------------|------|-----------|----------------|----------|--------------------------------------------------------------------------------------------------------------------------|
| <a href="#">811</a>   | 985.8130         | 984.8057         | 984.4988         | 0.3069         | 1    | 7         | 35             | 2        | K.EAHTSKNAK.K                                                                                                            |
| <a href="#">851</a>   | <b>496.6436</b>  | <b>991.2727</b>  | <b>990.5134</b>  | <b>0.7593</b>  | 0    | <b>43</b> | <b>0.0086</b>  | <b>1</b> | <b>K.LALNEFER.A</b>                                                                                                      |
| <a href="#">955</a>   | 509.8106         | 1017.6067        | 1017.5283        | 0.0784         | 1    | 10        | 20             | 3        | R.IKEFYR.V                                                                                                               |
| <a href="#">1204</a>  | 1071.5360        | 1070.5287        | 1069.4862        | 1.0425         | 1    | 4         | 63             | 3        | K.ASFEDMRK.G                                                                                                             |
| <a href="#">1387</a>  | 553.7266         | 1105.4387        | 1104.6404        | 0.7984         | 2    | 16        | 4.2            | 2        | K.KLTGDFIRR.V                                                                                                            |
| <a href="#">1453</a>  | <b>559.4276</b>  | <b>1116.8407</b> | <b>1118.5754</b> | <b>-1.7347</b> | 0    | <b>5</b>  | <b>58</b>      | <b>1</b> | <b>R.GLTMQVAVER.D</b> <a href="#">1480</a> <a href="#">1490</a>                                                          |
| <a href="#">1471</a>  | 560.9171         | 1119.8197        | 1120.4931        | -0.6734        | 1    | 1         | 1.3e+02        | 9        | R.EVMEGRNDR.I                                                                                                            |
| <a href="#">1476</a>  | <b>561.3091</b>  | <b>1120.6037</b> | <b>1119.4873</b> | <b>1.1164</b>  | 0    | <b>19</b> | <b>2.3</b>     | <b>1</b> | <b>K.EYFEDVYR.L</b>                                                                                                      |
| <a href="#">1852</a>  | 595.7601         | 1189.5057        | 1188.5995        | 0.9062         | 0    | 7         | 38             | 5        | R.TCILQGPMAAK.F                                                                                                          |
| <a href="#">2047</a>  | 614.6796         | 1227.3447        | 1226.6845        | 0.6602         | 0    | (0)       | 1.5e+02        | 8        | R.AMAWQIPLIGK.L                                                                                                          |
| <a href="#">2146</a>  | 622.3326         | 1242.6507        | 1242.6794        | -0.0287        | 0    | 6         | 46             | 8        | R.AMAWQIPLIGK.L                                                                                                          |
| <a href="#">2159</a>  | 623.2036         | 1244.3927        | 1243.6594        | 0.7333         | 1    | 4         | 65             | 6        | R.IMIAKEAHTSK.N                                                                                                          |
| <a href="#">2416</a>  | <b>637.7356</b>  | <b>1273.4567</b> | <b>1272.6979</b> | <b>0.7588</b>  | 0    | <b>67</b> | <b>3.2e-05</b> | <b>1</b> | <b>K.FPVILQWTGGR.G</b> <a href="#">2415</a>                                                                              |
| <a href="#">2450</a>  | 639.2911         | 1276.5677        | 1276.6775        | -0.1098        | 0    | 9         | 24             | 10       | K.NQISLTLFEGR.T                                                                                                          |
| <a href="#">3492</a>  | <b>695.0006</b>  | <b>1387.9867</b> | <b>1387.7249</b> | <b>0.2619</b>  | 0    | <b>19</b> | <b>2.1</b>     | <b>1</b> | <b>R.GIDVPFHSTFLR.S</b>                                                                                                  |
| <a href="#">4124</a>  | 731.7926         | 1461.5707        | 1459.6732        | 1.8975         | 0    | 6         | 36             | 2        | R.GAYLDFENTFQR.K                                                                                                         |
| <a href="#">4638</a>  | 508.3312         | 1521.9717        | 1522.7272        | -0.7555        | 1    | 4         | 53             | 6        | R.MVDLMYVKHESR.W                                                                                                         |
| <a href="#">4940</a>  | <b>776.2406</b>  | <b>1550.4667</b> | <b>1549.8174</b> | <b>0.6493</b>  | 0    | <b>58</b> | <b>0.00023</b> | <b>1</b> | <b>R.ALDCLTNLLNYLK.A</b> <a href="#">4943</a>                                                                            |
| <a href="#">5599</a>  | 537.9832         | 1610.9277        | 1611.8039        | -0.8762        | 1    | 2         | 1e+02          | 4        | R.KDEVPMQVHLASSR.D                                                                                                       |
| <a href="#">5792</a>  | <b>542.7149</b>  | <b>1625.1227</b> | <b>1622.8681</b> | <b>2.2546</b>  | 0    | <b>10</b> | <b>15</b>      | <b>1</b> | <b>R.HAIFLADIFVQGHR.F</b> <a href="#">5789</a>                                                                           |
| <a href="#">6506</a>  | 840.8966         | 1679.7787        | 1679.7937        | -0.0150        | 0    | 0         | 1.4e+02        | 6        | -.MYGTSTGPGTGINTPR.S                                                                                                     |
| <a href="#">6790</a>  | 851.0321         | 1700.0497        | 1698.8802        | 1.1696         | 1    | 2         | 96             | 8        | K.APTGLDQNRVPFTQR.K                                                                                                      |
| <a href="#">7113</a>  | 577.3999         | 1729.1777        | 1728.7923        | 0.3854         | 1    | 2         | 95             | 5        | R.SNYSMCAVNPSRISK.T                                                                                                      |
| <a href="#">7320</a>  | 584.5839         | 1750.7297        | 1747.9581        | 2.7717         | 1    | 1         | 1e+02          | 10       | R.GNDVHAVASALPGITAKK.T                                                                                                   |
| <a href="#">7815</a>  | <b>898.2391</b>  | <b>1794.4637</b> | <b>1793.9022</b> | <b>0.5615</b>  | 0    | <b>15</b> | <b>4.1</b>     | <b>1</b> | <b>R.HFMENYGLSIIDIVK.N</b>                                                                                               |
| <a href="#">7828</a>  | 898.6956         | 1795.3767        | 1794.8934        | 0.4833         | 1    | 2         | 84             | 6        | K.MNEKNQISLTLFEGR.T                                                                                                      |
| <a href="#">8308</a>  | <b>924.7516</b>  | <b>1847.4887</b> | <b>1846.8171</b> | <b>0.6716</b>  | 0    | <b>34</b> | <b>0.052</b>   | <b>1</b> | <b>R.FGYPPMPFDGCLFGSR.I</b>                                                                                              |
| <a href="#">8451</a>  | <b>930.8836</b>  | <b>1859.7527</b> | <b>1859.0305</b> | <b>0.7222</b>  | 0    | <b>89</b> | <b>1.6e-07</b> | <b>1</b> | <b>R.NFVVTGPPLSLYGLNLR.L</b> <a href="#">8450</a>                                                                        |
| <a href="#">9124</a>  | 646.2232         | 1935.6477        | 1935.0764        | 0.5713         | 1    | 4         | 50             | 7        | K.LVHLSNGFKMVPGAQPLK.V                                                                                                   |
| <a href="#">9574</a>  | 665.0545         | 1992.1417        | 1993.1473        | -1.0055        | 1    | 9         | 15             | 2        | K.TIPPGRGITINLIYVNP.R                                                                                                    |
| <a href="#">10367</a> | 694.2195         | 2079.6367        | 2080.1066        | -0.4698        | 0    | 12        | 7.7            | 2        | K.ATHIVDFGPGGISGLGVLN.R                                                                                                  |
| <a href="#">10498</a> | 700.2135         | 2097.6187        | 2095.1678        | 2.4510         | 0    | 7         | 30             | 2        | K.SVFSHVQTIGQVLELPTK.E                                                                                                   |
| <a href="#">10542</a> | <b>1052.3236</b> | <b>2102.6327</b> | <b>2102.0387</b> | <b>0.5940</b>  | 0    | <b>68</b> | <b>1.9e-05</b> | <b>1</b> | <b>K.AQNIDIPALMQSMSLEDVK.A</b>                                                                                           |
| <a href="#">10669</a> | 708.8435         | 2123.5087        | 2125.1102        | -1.6015        | 1    | 2         | 88             | 9        | R.AFMRGNDVHAVASALPGITAK.K                                                                                                |
| <a href="#">10888</a> | <b>717.4119</b>  | <b>2149.2137</b> | <b>2148.2055</b> | <b>1.0082</b>  | 0    | <b>54</b> | <b>0.00052</b> | <b>1</b> | <b>K.HIAFKPGSVDAIQQVINIAK.A</b>                                                                                          |
| <a href="#">10989</a> | 1083.8201        | 2165.6257        | 2163.0484        | 2.5773         | 2    | 1         | 91             | 6        | K.KAIADAPGLDDQDWEKTYK.G                                                                                                  |
| <a href="#">11176</a> | <b>1096.8526</b> | <b>2191.6907</b> | <b>2189.1004</b> | <b>2.5903</b>  | 0    | <b>19</b> | <b>1.6</b>     | <b>1</b> | <b>R.NGTSIEQPVYFENPIPLSGK.T</b>                                                                                          |
| <a href="#">11401</a> | <b>1110.8551</b> | <b>2219.6957</b> | <b>2219.1508</b> | <b>0.5450</b>  | 0    | <b>90</b> | <b>1.3e-07</b> | <b>1</b> | <b>R.SPSGLLSATQFTQPALTLMEK.A</b> <a href="#">11402</a> <a href="#">11404</a> <a href="#">11407</a> <a href="#">11409</a> |
| <a href="#">11865</a> | <b>764.0939</b>  | <b>2289.2597</b> | <b>2288.1266</b> | <b>1.1331</b>  | 0    | <b>25</b> | <b>0.44</b>    | <b>1</b> | <b>R.FLPITAPFHSQYLYSAYDR.I</b> <a href="#">11863</a>                                                                     |

|                       |          |           |           |         |   |    |         |   |                                                        |
|-----------------------|----------|-----------|-----------|---------|---|----|---------|---|--------------------------------------------------------|
| <a href="#">12124</a> | 775.5085 | 2323.5037 | 2324.2158 | -0.7121 | 1 | 0  | 1.2e+02 | 2 | K.GSAGGVVTVLSEMGEPIHKLATR.G                            |
| <a href="#">12571</a> | 799.1472 | 2394.4197 | 2393.0991 | 1.3206  | 1 | 10 | 11      | 2 | K.AIRQNYMSMTFESVNADGSIK.S                              |
| <a href="#">12676</a> | 804.7292 | 2411.1657 | 2410.1998 | 0.9660  | 0 | 38 | 0.018   | 1 | R.GQKPVPFVPALDENFEYWFK.K <a href="#">12666</a>         |
| <a href="#">12920</a> | 815.2602 | 2442.7587 | 2442.2002 | 0.5585  | 0 | 25 | 0.42    | 1 | R.VFSSYANLPGTITHGMYTSAAVR.S <a href="#">12912</a>      |
| <a href="#">14072</a> | 872.6722 | 2614.9947 | 2612.4690 | 2.5257  | 2 | 1  | 84      | 9 | R.FKNKSVFVSHVQTIGVLLLELPTK.E                           |
| <a href="#">14651</a> | 906.8365 | 2717.4877 | 2719.4560 | -1.9683 | 1 | 4  | 46      | 3 | K.EVFAPMDFAIVAGWKAITKPIFPR.T                           |
| <a href="#">14688</a> | 908.6395 | 2722.8967 | 2721.3803 | 1.5165  | 0 | 40 | 0.01    | 1 | R.TAEGGVVPLTFLFTYHPESGYAPIR.E <a href="#">14682</a>    |
| <a href="#">14788</a> | 917.1025 | 2748.2857 | 2747.5275 | 0.7582  | 2 | 0  | 1e+02   | 2 | R.GIDVPPFHSTFLRSGVKPFRSFLLK.K                          |
| <a href="#">15275</a> | 973.1775 | 2916.5107 | 2915.4414 | 1.0693  | 0 | 77 | 2e-06   | 1 | R.ETITSQAVADFVHAVGNTGEAFVDRPGK.E <a href="#">15276</a> |

33. [gi|220696409|gb|EED52751.1|](#) Mass: 17491 Score: 612 Queries matched: 21 emPAI: 1.88

40S ribosomal protein S15, putative [Aspergillus flavus NRRL3357]

| Query                 | Observed  | Mr(expt)  | Mr(calc)  | Delta   | Miss | Score | Expect  | Rank | Peptide                                                                                                                       |
|-----------------------|-----------|-----------|-----------|---------|------|-------|---------|------|-------------------------------------------------------------------------------------------------------------------------------|
| <a href="#">6016</a>  | 549.1009  | 1644.2807 | 1641.7192 | 2.5616  | 0    | 6     | 43      | 1    | -_MADTEYNAEAAAAIK.A <a href="#">5997</a>                                                                                      |
| <a href="#">8029</a>  | 908.7506  | 1815.4867 | 1813.9421 | 1.5446  | 0    | 94    | 6.2e-08 | 1    | R.GIDLQQLLDLSSEQLR.D <a href="#">8012</a> <a href="#">8018</a> <a href="#">8021</a> <a href="#">8034</a> <a href="#">8039</a> |
| <a href="#">9800</a>  | 1011.7336 | 2021.4527 | 2021.0577 | 0.3950  | 0    | 110   | 1.2e-09 | 1    | R.DMIIVPEMIGSVIGIYS GK.E <a href="#">9801</a> <a href="#">9803</a> <a href="#">9825</a> <a href="#">9827</a>                  |
| <a href="#">9982</a>  | 1019.7181 | 2037.4217 | 2037.0526 | 0.3691  | 0    | (32)  | 0.092   | 1    | R.DMIIVPEMIGSVIGIYS GK.E <a href="#">9977</a>                                                                                 |
| <a href="#">9997</a>  | 1020.1366 | 2038.2587 | 2037.0526 | 1.2061  | 0    | (83)  | 6.8e-07 | 1    | R.DMIIVPEMIGSVIGIYS GK.E <a href="#">9980</a>                                                                                 |
| <a href="#">10144</a> | 1028.3171 | 2054.6197 | 2053.0475 | 1.5722  | 0    | (48)  | 0.0023  | 1    | R.DMIIVPEMIGSVIGIYS GK.E <a href="#">10136</a>                                                                                |
| <a href="#">13302</a> | 832.4965  | 2494.4677 | 2495.3020 | -0.8342 | 2    | 5     | 41      | 1    | R.KFSYRGIDLQQLLDLSSEQLR.D                                                                                                     |
| <a href="#">13674</a> | 848.7582  | 2543.2527 | 2544.3444 | -1.0917 | 1    | 12    | 7       | 4    | K.THLRDMIIVPEMIGSVIGIYS GK.E                                                                                                  |

34. [gi|220697342|gb|EED53683.1|](#) Mass: 107115 Score: 604 Queries matched: 40 emPAI: 0.43

aminopeptidase [Aspergillus flavus NRRL3357]

| Query                | Observed | Mr(expt)  | Mr(calc)  | Delta   | Miss | Score | Expect  | Rank | Peptide                                                    |
|----------------------|----------|-----------|-----------|---------|------|-------|---------|------|------------------------------------------------------------|
| <a href="#">395</a>  | 432.7376 | 863.4607  | 863.4752  | -0.0145 | 0    | 14    | 7.3     | 2    | R.FSLDLAAK.T <a href="#">393</a>                           |
| <a href="#">988</a>  | 515.3301 | 1028.6457 | 1027.5815 | 1.0643  | 0    | 8     | 25      | 3    | K.KPPLSFPSR.S <a href="#">984</a>                          |
| <a href="#">1332</a> | 547.7801 | 1093.5457 | 1092.5961 | 0.9496  | 1    | 10    | 18      | 7    | K.GSSVLRMISK.Y                                             |
| <a href="#">1405</a> | 554.8651 | 1107.7157 | 1107.5601 | 0.1557  | 0    | 39    | 0.019   | 1    | K.AFDSSFPLPK.M <a href="#">1396</a> <a href="#">1399</a>   |
| <a href="#">3407</a> | 689.3491 | 1376.6837 | 1375.6918 | 0.9919  | 0    | (36)  | 0.044   | 1    | K.NQDIYMPLGGLR.N                                           |
| <a href="#">3534</a> | 697.0826 | 1392.1507 | 1391.6867 | 0.4640  | 0    | 47    | 0.003   | 1    | K.NQDIYMPLGGLR.N <a href="#">3532</a> <a href="#">3552</a> |
| <a href="#">3566</a> | 698.7346 | 1395.4547 | 1394.7194 | 0.7353  | 0    | 60    | 0.00016 | 1    | K.YLGEDVFIQVVR.N                                           |
| <a href="#">3627</a> | 702.4391 | 1402.8637 | 1402.7052 | 0.1585  | 1    | 19    | 2       | 2    | R.NAPTSDEKTTALR.C <a href="#">3636</a>                     |
| <a href="#">3745</a> | 710.7366 | 1419.4587 | 1418.7405 | 0.7182  | 0    | 32    | 0.09    | 1    | K.FAETIPAGSSAQLK.L                                         |
| <a href="#">3752</a> | 474.5429 | 1420.6067 | 1421.6456 | -1.0389 | 0    | 7     | 29      | 8    | K.QGLDENTMLTER.E                                           |
| <a href="#">4046</a> | 726.8216 | 1451.6287 | 1449.7075 | 1.9213  | 1    | 2     | 94      | 1    | R.RAFPCFDEPALK.A                                           |
| <a href="#">6004</a> | 822.8691 | 1643.7237 | 1642.8930 | 0.8307  | 0    | 78    | 2.4e-06 | 1    | K.ALLFGAAGSAEDPVVVK.A                                      |
| <a href="#">6625</a> | 844.2856 | 1686.5567 | 1685.8096 | 0.7471  | 1    | 2     | 1e+02   | 8    | R.NHTAGIEARWAWMK.N                                         |
| <a href="#">7374</a> | 879.7761 | 1757.5377 | 1756.8342 | 0.7036  | 0    | 94    | 5.6e-08 | 1    | R.ADEINQIFDAISYMK.G <a href="#">7368</a>                   |

|                       |           |           |           |         |   |      |         |    |                                         |                                             |
|-----------------------|-----------|-----------|-----------|---------|---|------|---------|----|-----------------------------------------|---------------------------------------------|
| <a href="#">7602</a>  | 889.2576  | 1776.5007 | 1774.9326 | 1.5682  | 2 | 4    | 70      | 3  | K.GFDRAVEQSLDAIRAK.I                    | <a href="#">7604</a>                        |
| <a href="#">8184</a>  | 917.1026  | 1832.1907 | 1831.8927 | 0.2980  | 0 | 23   | 0.72    | 1  | K.LTFTGILNDNMAGFYR.S                    | <a href="#">8174</a> <a href="#">8191</a>   |
| <a href="#">8269</a>  | 922.7261  | 1843.4377 | 1844.8805 | -1.4428 | 2 | 0    | 1.4e+02 | 3  | K.NGGEKEYNVVYDRFR.N                     |                                             |
| <a href="#">8729</a>  | 946.2001  | 1890.3857 | 1889.9735 | 0.4123  | 0 | 112  | 8.1e-10 | 1  | K.NVGFPVVTVAEDAASSSIK.L                 | <a href="#">8734</a>                        |
| <a href="#">10771</a> | 713.6615  | 2137.9627 | 2136.0640 | 1.8987  | 1 | 1    |         | 99 | K.VPDLDFYKLNADHSAIYR.T                  |                                             |
| <a href="#">11669</a> | 1131.8576 | 2261.7007 | 2261.1362 | 0.5645  | 0 | 6    |         | 30 | R.TGDVRPEEDTTLYPVMLGLR.T                |                                             |
| <a href="#">12329</a> | 1179.7621 | 2357.5097 | 2356.1733 | 1.3365  | 1 | 1    |         | 87 | R.ADEINQIFDAISYMKGSSVLR.M               |                                             |
| <a href="#">13211</a> | 1242.0761 | 2482.1377 | 2481.2785 | 0.8593  | 0 | 109  | 1.4e-09 | 1  | R.AGMIADAGALASSGYQSTSGLLSLLK.G          | <a href="#">13207</a> <a href="#">13223</a> |
| <a href="#">13328</a> | 833.7749  | 2498.3027 | 2497.2734 | 1.0293  | 0 | (35) | 0.036   | 1  | R.AGMIADAGALASSGYQSTSGLLSLLK.G          | <a href="#">13329</a>                       |
| <a href="#">14791</a> | 917.3949  | 2749.1627 | 2747.4238 | 1.7389  | 0 | 6    |         | 28 | R.LPPGLGMLGTVVQLTTSFCTEAQLK.E           |                                             |
| <a href="#">16404</a> | 1164.6342 | 3490.8807 | 3492.8134 | -1.9326 | 1 | 1    |         | 65 | K.QGLLTVEDRAGMIADAGALASSGYQSTSGLLSLLK.G |                                             |

35. [gi|220698109|gb|EED54449.1|](#) Mass: 53195 Score: 580 Queries matched: 57 emPAI: 1.06

mitochondrial processing peptidase beta subunit, putative [Aspergillus flavus NRRL3357]

| Query                 | Observed  | Mr(expt)  | Mr(calc)  | Delta   | Miss | Score | Expect  | Rank | Peptide                                                                                                                                                              |
|-----------------------|-----------|-----------|-----------|---------|------|-------|---------|------|----------------------------------------------------------------------------------------------------------------------------------------------------------------------|
| <a href="#">458</a>   | 884.5460  | 883.5387  | 883.4763  | 0.0624  | 0    | 28    | 0.22    | 1    | K.LEPGAIER.E <a href="#">457</a>                                                                                                                                     |
| <a href="#">497</a>   | 451.0531  | 900.0917  | 899.5188  | 0.5729  | 1    | 30    | 0.18    | 1    | R.ERDVILR.E                                                                                                                                                          |
| <a href="#">583</a>   | 461.0651  | 920.1157  | 919.4399  | 0.6758  | 0    | 28    | 0.27    | 1    | K.SFNNDVPK.A                                                                                                                                                         |
| <a href="#">670</a>   | 958.3540  | 957.3467  | 957.4767  | -0.1300 | 0    | 24    | 0.7     | 1    | R.LSPEDIER.T                                                                                                                                                         |
| <a href="#">691</a>   | 481.0391  | 960.0637  | 959.5036  | 0.5601  | 0    | 34    | 0.081   | 1    | K.ENIQTISR.D <a href="#">689</a>                                                                                                                                     |
| <a href="#">807</a>   | 492.7546  | 983.4947  | 982.4178  | 1.0769  | 0    | 7     |         | 26   | K.DVMDFANR.R                                                                                                                                                         |
| <a href="#">1437</a>  | 557.7896  | 1113.5647 | 1113.5778 | -0.0131 | 1    | 45    | 0.0048  | 1    | R.RLSPEDIER.T <a href="#">1438</a> <a href="#">1439</a>                                                                                                              |
| <a href="#">1592</a>  | 1136.5540 | 1135.5467 | 1133.5717 | 1.9750  | 0    | 8     |         | 23   | R.TPEFIGSEVR.L <a href="#">1581</a>                                                                                                                                  |
| <a href="#">2584</a>  | 646.6121  | 1291.2097 | 1289.6728 | 1.5369  | 1    | 34    | 0.062   | 1    | K.RTPEFIGSEVR.L <a href="#">2576</a>                                                                                                                                 |
| <a href="#">2646</a>  | 650.1086  | 1298.2027 | 1296.7877 | 1.4150  | 2    | 3     |         | 81   | R.SRAALKSIQPVK.R                                                                                                                                                     |
| <a href="#">3598</a>  | 700.6681  | 1399.3217 | 1398.7718 | 0.5499  | 0    | 78    | 2.2e-06 | 1    | K.AVDILADILQNSK.L <a href="#">3594</a> <a href="#">3597</a> <a href="#">3605</a> <a href="#">3613</a> <a href="#">3617</a> <a href="#">3620</a> <a href="#">3621</a> |
| <a href="#">3772</a>  | 713.1076  | 1424.2007 | 1423.6766 | 0.5242  | 0    | 73    | 6.8e-06 | 1    | R.LCFNVTSAEVER.A <a href="#">3767</a>                                                                                                                                |
| <a href="#">5288</a>  | 529.3662  | 1585.0767 | 1584.8049 | 0.2719  | 0    | 10    |         | 16   | K.TNGTAHFLEHLAFK.G <a href="#">5293</a> <a href="#">5297</a>                                                                                                         |
| <a href="#">6442</a>  | 838.2436  | 1674.4727 | 1674.9240 | -0.4512 | 0    | (8)   |         | 23   | R.MVLVGAGGIPHEQLVR.L                                                                                                                                                 |
| <a href="#">6692</a>  | 846.7881  | 1691.5617 | 1690.9189 | 0.6429  | 0    | 62    | 8.8e-05 | 1    | R.MVLVGAGGIPHEQLVR.L <a href="#">6678</a> <a href="#">6686</a> <a href="#">6689</a>                                                                                  |
| <a href="#">8841</a>  | 952.0016  | 1901.9887 | 1901.0106 | 0.9782  | 0    | 33    | 0.078   | 1    | K.ASILLSLDGTTAVAEDIGR.Q <a href="#">8833</a> <a href="#">8844</a> <a href="#">8846</a> <a href="#">8847</a> <a href="#">8851</a> <a href="#">885</a>                 |
| <a href="#">10732</a> | 711.3279  | 2130.9617 | 2129.0542 | 1.9076  | 1    | 1     |         | 97   | R.AETDKTNGTAHFLEHLAFK.G                                                                                                                                              |
| <a href="#">11022</a> | 1085.6961 | 2169.3777 | 2168.0175 | 1.3603  | 0    | 77    | 2.6e-06 | 1    | K.DDDYFTALVAQIVGNWDR.A <a href="#">11008</a> <a href="#">11014</a> <a href="#">11020</a>                                                                             |
| <a href="#">13444</a> | 838.2435  | 2511.7087 | 2512.2856 | -0.5769 | 1    | 9     |         | 13   | K.TNYTADRMVLVGAGGIPHEQLVR.L                                                                                                                                          |
| <a href="#">13670</a> | 848.2575  | 2541.7507 | 2540.2077 | 1.5430  | 0    | 70    | 1.2e-05 | 1    | R.SQHQLELEIENMGAHLNAYTSR.E <a href="#">13667</a>                                                                                                                     |
| <a href="#">14530</a> | 898.6052  | 2692.7937 | 2692.4072 | 0.3866  | 0    | 53    | 0.00063 | 1    | R.LAEHFHGLSPKPTSAALALTAEQK.R <a href="#">14535</a> <a href="#">14537</a>                                                                                             |
| <a href="#">14627</a> | 904.7372  | 2711.1897 | 2712.3038 | -1.1140 | 1    | 4     |         | 47   | K.RSQHQLELEIENMGAHLNAYTSR.E                                                                                                                                          |
| <a href="#">16366</a> | 1153.2172 | 3456.6297 | 3455.6382 | 0.9915  | 1    | 53    | 0.00048 | 1    | R.EQEEVDKQFEEVVFDDLHATAYQNQPLGR.T <a href="#">16365</a>                                                                                                              |

36. [gi|220691708|gb|EED48056.1|](#) Mass: 32920 Score: 568 Queries matched: 35 emPAI: 1.61

ubiquinol-cytochrome C reductase complex core protein 2, putative [Aspergillus flavus NRRL3357]

| Query                 | Observed  | Mr(expt)  | Mr(calc)  | Delta   | Miss | Score | Expect  | Rank | Peptide                                                                                                                             |
|-----------------------|-----------|-----------|-----------|---------|------|-------|---------|------|-------------------------------------------------------------------------------------------------------------------------------------|
| <a href="#">113</a>   | 723.4480  | 722.4407  | 722.3599  | 0.0808  | 0    | 41    | 0.011   | 1    | K.NFLSDK.A                                                                                                                          |
| <a href="#">544</a>   | 456.5946  | 911.1747  | 910.4701  | 0.7046  | 0    | 18    |         | 2    | K.WVGQFFK.E <a href="#">540</a> <a href="#">545</a>                                                                                 |
| <a href="#">1831</a>  | 594.3696  | 1186.7247 | 1187.6034 | -0.8786 | 0    | 3     |         | 87   | K.VAAGEVASEDIK.K                                                                                                                    |
| <a href="#">2800</a>  | 659.1736  | 1316.3327 | 1315.6983 | 0.6344  | 1    | 72    | 1e-05   | 1    | K.VAAGEVASEDIKK.A <a href="#">2802</a>                                                                                              |
| <a href="#">3034</a>  | 671.7101  | 1341.4057 | 1339.7711 | 1.6346  | 0    | 67    | 3.3e-05 | 1    | R.EVAGPTATLALVAK.A <a href="#">3012</a> <a href="#">3024</a> <a href="#">3035</a>                                                   |
| <a href="#">3963</a>  | 722.7376  | 1443.4607 | 1443.7933 | -0.3326 | 2    | 6     |         | 37   | K.KVAAGEVASEDIKK.A <a href="#">3955</a> <a href="#">3968</a>                                                                        |
| <a href="#">7709</a>  | 893.1721  | 1784.3297 | 1782.8788 | 1.4509  | 0    | 0     | 1.4e+02 | 1    | K.SHTYSDAGLFTISLSGK.A                                                                                                               |
| <a href="#">9568</a>  | 996.8356  | 1991.6567 | 1990.9465 | 0.7102  | 0    | 81    | 1e-06   | 1    | R.YQFPFGFSDALEQFAFK.W <a href="#">9561</a> <a href="#">9578</a> <a href="#">9581</a>                                                |
| <a href="#">10373</a> | 1041.2596 | 2080.5047 | 2079.0232 | 1.4815  | 0    | 66    | 3.1e-05 | 1    | K.ELPSSGSSSQYQLRPGATSK.Y <a href="#">10371</a> <a href="#">10375</a> <a href="#">10392</a>                                          |
| <a href="#">10468</a> | 1047.6651 | 2093.3157 | 2093.0694 | 0.2463  | 0    | 56    | 0.00034 | 1    | K.WTPGFSLLAQATQGFQVR.A <a href="#">10452</a> <a href="#">10476</a> <a href="#">10477</a> <a href="#">10478</a> <a href="#">1048</a> |
| <a href="#">11420</a> | 742.1829  | 2223.5267 | 2222.1001 | 1.4266  | 1    | 2     |         | 88   | R.RSMASAAATPGLQYDVTEAGVK.L                                                                                                          |
| <a href="#">11583</a> | 1126.3406 | 2250.6667 | 2250.1420 | 0.5247  | 0    | 90    | 1.2e-07 | 1    | K.ASVASVGDLEFLPYGEDLGLTV.- <a href="#">11586</a> <a href="#">11590</a> <a href="#">11599</a>                                        |

37. [gi|220690088|gb|EED46438.1|](#) Mass: 29318 Score: 543 Queries matched: 38 emPAI: 2.64

40S ribosomal protein S4, putative [Aspergillus flavus NRRL3357]

| Query                 | Observed  | Mr(expt)  | Mr(calc)  | Delta   | Miss | Score | Expect  | Rank | Peptide                                                                                                                              |
|-----------------------|-----------|-----------|-----------|---------|------|-------|---------|------|--------------------------------------------------------------------------------------------------------------------------------------|
| <a href="#">111</a>   | 722.4360  | 721.4287  | 722.3347  | -0.9060 | 0    | 12    |         | 10   | K.TGENFR.L                                                                                                                           |
| <a href="#">185</a>   | 772.5510  | 771.5437  | 771.4491  | 0.0947  | 0    | 38    | 0.028   | 1    | R.LIQVDGK.V                                                                                                                          |
| <a href="#">329</a>   | 422.8766  | 843.7387  | 841.4882  | 2.2505  | 2    | 7     |         | 44   | R.RRAAAIAN.-                                                                                                                         |
| <a href="#">1112</a>  | 527.5441  | 1053.0737 | 1051.5887 | 1.4850  | 1    | 9     |         | 18   | R.VGVVTHRER.H                                                                                                                        |
| <a href="#">1253</a>  | 541.0941  | 1080.1737 | 1079.5135 | 0.6603  | 0    | 38    | 0.025   | 1    | R.IQAEAEYK.L <a href="#">1250</a>                                                                                                    |
| <a href="#">1412</a>  | 555.2746  | 1108.5347 | 1108.5149 | 0.0198  | 0    | 60    | 0.00016 | 1    | K.DAVDNTFATR.E <a href="#">1414</a>                                                                                                  |
| <a href="#">2175</a>  | 624.2216  | 1246.4287 | 1244.6951 | 1.7336  | 0    | 43    | 0.0077  | 1    | R.DCLPLIVFIR.N <a href="#">2181</a>                                                                                                  |
| <a href="#">2348</a>  | 633.8011  | 1265.5877 | 1265.6768 | -0.0891 | 0    | 46    | 0.0042  | 1    | R.LSAPSHWLLDK.M                                                                                                                      |
| <a href="#">2502</a>  | 642.1526  | 1282.2907 | 1281.6830 | 0.6077  | 0    | 53    | 0.00075 | 1    | K.GGIPFLVTHDAR.T <a href="#">2498</a> <a href="#">2507</a> <a href="#">2518</a> <a href="#">2521</a> <a href="#">2524</a>            |
| <a href="#">3137</a>  | 676.9976  | 1351.9807 | 1350.6966 | 1.2841  | 0    | 2     |         | 91   | R.FDTGVVIMVTGGR.N                                                                                                                    |
| <a href="#">4556</a>  | 758.3256  | 1514.6367 | 1513.8803 | 0.7564  | 1    | 56    | 0.00034 | 1    | K.LRDCLPLIVFIR.N <a href="#">4555</a> <a href="#">4560</a>                                                                           |
| <a href="#">4773</a>  | 513.0635  | 1536.1687 | 1533.8007 | 2.3680  | 1    | 2     |         | 88   | K.AIMMQRLIQVDGK.V                                                                                                                    |
| <a href="#">6149</a>  | 551.9042  | 1652.6907 | 1651.9158 | 0.7749  | 1    | 5     |         | 46   | K.GGIPFLVTHDARTIR.Y <a href="#">6153</a>                                                                                             |
| <a href="#">8219</a>  | 919.8276  | 1837.6407 | 1836.8968 | 0.7439  | 0    | 91    | 1e-07   | 1    | R.TDPTFPAGFMDVIGIEK.T <a href="#">8220</a> <a href="#">8226</a> <a href="#">8228</a>                                                 |
| <a href="#">8375</a>  | 927.7856  | 1853.5567 | 1852.8917 | 0.6650  | 0    | (43)  | 0.0066  | 1    | R.TDPTFPAGFMDVIGIEK.T <a href="#">8363</a>                                                                                           |
| <a href="#">9344</a>  | 982.7986  | 1963.5827 | 1963.1116 | 0.4712  | 2    | 1     | 1.1e+02 | 9    | K.RVQLGKGGIPFLVTHDAR.T                                                                                                               |
| <a href="#">10165</a> | 1029.2826 | 2056.5507 | 2056.0993 | 0.4514  | 0    | 55    | 0.00038 | 1    | R.ESNVFVIGQDKPWISLPK.G <a href="#">10174</a> <a href="#">10177</a> <a href="#">10179</a> <a href="#">10187</a> <a href="#">10192</a> |
| <a href="#">13674</a> | 848.7582  | 2543.2527 | 2541.2210 | 2.0317  | 1    | 7     |         | 26   | R.TDPTFPAGFMDVIGIEKTGENFR.L                                                                                                          |

38. [gi|220696127|gb|EED52469.1|](#) Mass: 29058 Score: 535 Queries matched: 54 emPAI: 4.08



## 60S ribosomal protein L7 [Aspergillus flavus NRRL3357]

| Query                 | Observed  | Mr(expt)  | Mr(calc)  | Delta   | Miss | Score | Expect  | Rank | Peptide                                                                                                                                                               |
|-----------------------|-----------|-----------|-----------|---------|------|-------|---------|------|-----------------------------------------------------------------------------------------------------------------------------------------------------------------------|
| <a href="#">35</a>    | 665.5110  | 664.5037  | 664.3795  | 0.1242  | 0    | 26    | 0.39    | 1    | R.ELIYK.R                                                                                                                                                             |
| <a href="#">80</a>    | 696.4220  | 695.4147  | 695.3490  | 0.0657  | 0    | 12    | 7.2     | 1    | R.AESYVK.E                                                                                                                                                            |
| <a href="#">157</a>   | 378.5981  | 755.1817  | 754.5065  | 0.6752  | 0    | 40    | 0.013   | 1    | K.ILQLLR.L <a href="#">158</a>                                                                                                                                        |
| <a href="#">389</a>   | 431.7581  | 861.5017  | 860.5344  | 0.9673  | 2    | 16    | 5.2     | 6    | K.RAAIFKR.A                                                                                                                                                           |
| <a href="#">456</a>   | 442.7121  | 883.4097  | 882.6014  | 0.8083  | 1    | 36    | 0.031   | 1    | R.KILQLLR.L                                                                                                                                                           |
| <a href="#">461</a>   | 443.6371  | 885.2597  | 884.5555  | 0.7042  | 2    | 8     | 29      | 8    | R.EKIRLAR.V                                                                                                                                                           |
| <a href="#">1135</a>  | 529.5556  | 1057.0967 | 1056.5352 | 0.5615  | 0    | 32    | 0.11    | 1    | K.LSNPTGGFHK.R <a href="#">1132</a>                                                                                                                                   |
| <a href="#">1207</a>  | 536.3311  | 1070.6477 | 1070.5720 | 0.0757  | 0    | 29    | 0.2     | 1    | R.EENINALIR.Q <a href="#">1208</a>                                                                                                                                    |
| <a href="#">1544</a>  | 565.9746  | 1129.9347 | 1129.6091 | 0.3256  | 2    | 1     | 1.5e+02 | 5    | R.AVAREEAEEK.K                                                                                                                                                        |
| <a href="#">2126</a>  | 620.6356  | 1239.2567 | 1236.7302 | 2.5265  | 2    | 8     | 22      | 3    | K.GINKISPQPRK.I                                                                                                                                                       |
| <a href="#">2325</a>  | 632.8566  | 1263.6987 | 1263.5632 | 0.1355  | 0    | 47    | 0.0033  | 1    | K.HFIEGGDYGNR.E <a href="#">2326</a>                                                                                                                                  |
| <a href="#">2327</a>  | 633.1436  | 1264.2727 | 1263.6400 | 0.6327  | 0    | 45    | 0.0053  | 1    | K.QANNFLWPFK.L <a href="#">2336</a> <a href="#">2342</a> <a href="#">2345</a>                                                                                         |
| <a href="#">2420</a>  | 637.8406  | 1273.6667 | 1273.7143 | -0.0475 | 0    | 54    | 0.00068 | 1    | R.LLQINNGTFVR.L <a href="#">2427</a> <a href="#">2428</a> <a href="#">2446</a>                                                                                        |
| <a href="#">2741</a>  | 655.6671  | 1309.3197 | 1307.6034 | 1.7164  | 0    | 38    | 0.023   | 1    | K.EGNFYVPEEPK.L <a href="#">2736</a>                                                                                                                                  |
| <a href="#">3882</a>  | 718.8366  | 1435.6587 | 1435.6983 | -0.0396 | 1    | 52    | 0.0011  | 1    | R.KEGNFYVPEEPK.L <a href="#">3886</a>                                                                                                                                 |
| <a href="#">6001</a>  | 822.8226  | 1643.6307 | 1641.8573 | 1.7734  | 0    | 60    | 0.00016 | 1    | R.VAISDNQIIEENLGK.Y <a href="#">5976</a> <a href="#">5977</a> <a href="#">5978</a> <a href="#">5983</a> <a href="#">5986</a> <a href="#">5988</a> <a href="#">600</a> |
| <a href="#">12092</a> | 773.6952  | 2318.0637 | 2316.1247 | 1.9391  | 1    | 32    | 0.081   | 1    | K.HFIEGGDYGNREENINALIR.Q <a href="#">12076</a> <a href="#">12087</a>                                                                                                  |
| <a href="#">12271</a> | 783.5085  | 2347.5037 | 2348.2951 | -0.7914 | 1    | 2     | 85      | 7    | M.ASTATTVPDQHVLPETLLKK.R                                                                                                                                              |
| <a href="#">12697</a> | 805.6735  | 2413.9987 | 2412.2399 | 1.7589  | 0    | 79    | 1.6e-06 | 1    | K.ATQEMLTIIINPYIAYGYPNLK.S <a href="#">12685</a> <a href="#">12687</a> <a href="#">12689</a>                                                                          |
| <a href="#">12812</a> | 1215.3506 | 2428.6867 | 2428.2348 | 0.4519  | 0    | (63)  | 5.3e-05 | 1    | K.ATQEMLTIIINPYIAYGYPNLK.S <a href="#">12824</a> <a href="#">12831</a>                                                                                                |
| <a href="#">13090</a> | 1234.8756 | 2467.7367 | 2465.2301 | 2.5066  | 0    | 50    | 0.0013  | 1    | K.YGIVCVEDLIHEIYTVGPNFK.Q <a href="#">13044</a> <a href="#">13050</a> <a href="#">13051</a> <a href="#">13056</a> <a href="#">13</a>                                  |

39. [gi|220697497|gb|EED53838.1|](#) Mass: 65234 Score: 531 Queries matched: 44 emPAI: 0.48

phosphoribosylaminoimidazolecarboxamide formyltransferase/IMP [Aspergillus flavus NRRL3357]

| Query                | Observed | Mr(expt)  | Mr(calc)  | Delta   | Miss | Score | Expect  | Rank | Peptide                                                      |
|----------------------|----------|-----------|-----------|---------|------|-------|---------|------|--------------------------------------------------------------|
| <a href="#">855</a>  | 497.1986 | 992.3827  | 992.5543  | -0.1715 | 0    | 15    | 6       | 1    | K.TFSTIVTPK.D                                                |
| <a href="#">879</a>  | 500.5621 | 999.1097  | 998.5397  | 0.5701  | 0    | 17    | 3.6     | 4    | R.NDVVISPOK.T <a href="#">880</a> <a href="#">883</a>        |
| <a href="#">1975</a> | 607.8696 | 1213.7247 | 1213.6302 | 0.0945  | 0    | 17    | 3.6     | 2    | K.DLQSLPDSALR.D                                              |
| <a href="#">2000</a> | 610.1736 | 1218.3327 | 1217.6768 | 0.6559  | 0    | 21    | 1.6     | 2    | K.LGIVFVEQGTR.L                                              |
| <a href="#">2023</a> | 612.5291 | 1223.0437 | 1222.6346 | 0.4091  | 0    | 45    | 0.0048  | 1    | K.QALGYPAASFK.H <a href="#">2024</a>                         |
| <a href="#">4292</a> | 494.2405 | 1479.6997 | 1477.6772 | 2.0225  | 1    | 9     | 18      | 1    | R.LAGDKADNWMR.F                                              |
| <a href="#">4442</a> | 751.2391 | 1500.4637 | 1499.7483 | 0.7154  | 0    | 54    | 0.00064 | 1    | K.VDFVVCNLYPEK.E <a href="#">4436</a>                        |
| <a href="#">4477</a> | 502.0562 | 1503.1467 | 1500.7355 | 2.4113  | 0    | 7     | 31      | 6    | K.ANAIDLLCSGNTPR.N                                           |
| <a href="#">4928</a> | 517.5812 | 1549.7217 | 1548.6681 | 1.0537  | 1    | 5     | 44      | 4    | K.ADNWWMRFHDR.V                                              |
| <a href="#">5618</a> | 806.8191 | 1611.6237 | 1612.8130 | -1.1893 | 1    | 3     | 80      | 5    | - .MSQQKSAILSVDK.T <a href="#">5615</a> <a href="#">5621</a> |
| <a href="#">6545</a> | 841.7486 | 1681.4827 | 1681.9839 | -0.5011 | 2    | 0     | 1.4e+02 | 1    | K.TGLLDLAKGLAKNNVR.L                                         |
| <a href="#">6895</a> | 854.7066 | 1707.3987 | 1706.8152 | 0.5836  | 0    | 32    | 0.1     | 1    | R.VFEEVPTPTQEEER.E <a href="#">6892</a>                      |
| <a href="#">7460</a> | 883.4866 | 1764.9587 | 1763.8982 | 1.0606  | 0    | 82    | 9.9e-07 | 1    | R.VTILSDPQDYPEFLK.E <a href="#">7468</a>                     |

|                       |                  |                  |                  |                |   |           |                |   |                                                                                                                                             |
|-----------------------|------------------|------------------|------------------|----------------|---|-----------|----------------|---|---------------------------------------------------------------------------------------------------------------------------------------------|
| <a href="#">8050</a>  | 606.7029         | 1817.0867        | 1814.8945        | 2.1923         | 1 | 7         | 31             | 6 | R.ADKANAIDLLCSGNTPR.N <a href="#">8003</a> <a href="#">8008</a>                                                                             |
| <a href="#">10255</a> | <b>1033.3121</b> | <b>2064.6097</b> | <b>2064.0449</b> | <b>0.5648</b>  | 0 | <b>89</b> | <b>1.5e-07</b> | 1 | <b>R.MSSFGDILALSDVVDVPTAK.I</b> <a href="#">10269</a>                                                                                       |
| <a href="#">10383</a> | 1041.4721        | 2080.9297        | 2080.0398        | 0.8899         | 0 | (35)      | 0.045          | 1 | R.MSSFGDILALSDVVDVPTAK.I <a href="#">10392</a>                                                                                              |
| <a href="#">10616</a> | <b>705.8229</b>  | <b>2114.4467</b> | <b>2116.0425</b> | <b>-1.5958</b> | 2 | 2         | 92             | 2 | K.ADNWWMRFHDRVLNK.W                                                                                                                         |
| <a href="#">10874</a> | <b>1074.8751</b> | <b>2147.7357</b> | <b>2147.0997</b> | <b>0.6360</b>  | 0 | <b>73</b> | <b>6.3e-06</b> | 1 | <b>R.EVSDGVIAAGYSPEALEILSK.K</b> <a href="#">10869</a> <a href="#">10873</a> <a href="#">10887</a> <a href="#">10890</a> <a href="#">10</a> |
| <a href="#">11639</a> | 753.7622         | 2258.2647        | 2258.0889        | 0.1758         | 0 | 2         | 76             | 2 | K.VYVDDIAGIETSGLAQAYAR.A                                                                                                                    |
| <a href="#">11925</a> | <b>1150.5051</b> | <b>2298.9957</b> | <b>2298.2372</b> | <b>0.7585</b>  | 0 | <b>56</b> | <b>0.00035</b> | 1 | <b>K.ALNGSPGYVNLDDALNAWALVK.E</b> <a href="#">11937</a> <a href="#">11939</a> <a href="#">11941</a>                                         |
| <a href="#">13206</a> | 828.2562         | 2481.7467        | 2479.2265        | 2.5203         | 1 | 5         | 41             | 2 | R.GADRMSSFGDILALSDVVDVPTAK.I <a href="#">13208</a>                                                                                          |
| <a href="#">13557</a> | 842.5109         | 2524.5107        | 2525.2472        | -0.7364        | 2 | 2         | 82             | 2 | K.KGGKYLVLQMDSEYVPPAETR.T                                                                                                                   |
| <a href="#">15775</a> | <b>1044.3192</b> | <b>3129.9357</b> | <b>3127.4774</b> | <b>2.4583</b>  | 2 | 2         | 57             | 1 | <b>K.AEYERVFEEVPTPFTQEERESWLEK.L</b>                                                                                                        |

40. [gi|220697614|gb|EED53955.1|](#) Mass: 49531 Score: 528 Queries matched: 38 emPAI: 1.03

Glutamate/Leucine/Phenylalanine/Valine dehydrogenase, putative [Aspergillus flavus NRRL3357]

| Query                 | Observed         | Mr(expt)         | Mr(calc)         | Delta          | Miss | Score      | Expect         | Rank | Peptide                                                                                                             |
|-----------------------|------------------|------------------|------------------|----------------|------|------------|----------------|------|---------------------------------------------------------------------------------------------------------------------|
| <a href="#">938</a>   | 508.3311         | 1014.6477        | 1014.4151        | 0.2327         | 0    | 9          | 25             | 7    | K.GIMEDCFK.N                                                                                                        |
| <a href="#">1049</a>  | <b>521.6576</b>  | <b>1041.3007</b> | <b>1039.6026</b> | <b>1.6981</b>  | 0    | <b>47</b>  | <b>0.0032</b>  | 1    | <b>K.ALAVSVPER.V</b> <a href="#">1040</a>                                                                           |
| <a href="#">1529</a>  | <b>565.2071</b>  | <b>1128.3997</b> | <b>1127.6015</b> | <b>0.7982</b>  | 0    | <b>46</b>  | <b>0.0045</b>  | 1    | <b>K.FLGFEQIFK.N</b> <a href="#">1526</a>                                                                           |
| <a href="#">1652</a>  | <b>574.5906</b>  | <b>1147.1667</b> | <b>1147.5656</b> | <b>-0.3988</b> | 0    | <b>24</b>  | <b>0.75</b>    | 1    | <b>K.NALTGLNMGGGK.G</b>                                                                                             |
| <a href="#">1980</a>  | <b>608.6391</b>  | <b>1215.2637</b> | <b>1214.6084</b> | <b>0.6553</b>  | 0    | <b>44</b>  | <b>0.0062</b>  | 1    | <b>R.EVGFLFGQYR.K</b> <a href="#">1979</a>                                                                          |
| <a href="#">2022</a>  | 612.4666         | 1222.9187        | 1222.6346        | 0.2841         | 0    | 5          | 49             | 6    | R.VQFNSALGPYK.G                                                                                                     |
| <a href="#">2243</a>  | 628.2301         | 1254.4457        | 1253.7132        | 0.7325         | 0    | 2          | 99             | 4    | R.FHPSVNLK.F                                                                                                        |
| <a href="#">2828</a>  | <b>660.6221</b>  | <b>1319.2297</b> | <b>1318.6153</b> | <b>0.6144</b>  | 0    | <b>60</b>  | <b>0.00016</b> | 1    | <b>R.INWTSEEVDAR.L</b> <a href="#">2822</a>                                                                         |
| <a href="#">3630</a>  | 468.7292         | 1403.1657        | 1402.6953        | 0.4704         | 2    | 2          | 90             | 10   | K.HATDGKESFAGKR.V                                                                                                   |
| <a href="#">4918</a>  | <b>775.4086</b>  | <b>1548.8027</b> | <b>1547.8307</b> | <b>0.9720</b>  | 0    | <b>43</b>  | <b>0.0068</b>  | 1    | <b>R.VAISGSGNVAQYAALK.V</b> <a href="#">4915</a> <a href="#">4929</a> <a href="#">4930</a> <a href="#">4936</a>     |
| <a href="#">5218</a>  | 790.7716         | 1579.5287        | 1579.8093        | -0.2806        | 0    | 73         | 7.2e-06        | 1    | K.ELASTLENSTLFQK.N <a href="#">5231</a>                                                                             |
| <a href="#">7316</a>  | <b>584.5092</b>  | <b>1750.5057</b> | <b>1749.8646</b> | <b>0.6411</b>  | 0    | <b>21</b>  |                | 1    | <b>K.HIGADTDVPAGDIGVTGR.E</b>                                                                                       |
| <a href="#">7366</a>  | <b>879.2811</b>  | <b>1756.5477</b> | <b>1755.9043</b> | <b>0.6434</b>  | 1    | <b>8</b>   |                | 22   | <b>K.QISEIASTEAFASKFK.Y</b> <a href="#">7356</a>                                                                    |
| <a href="#">8721</a>  | <b>945.6476</b>  | <b>1889.2807</b> | <b>1888.9061</b> | <b>0.3746</b>  | 0    | <b>100</b> | <b>1.6e-08</b> | 1    | <b>K.AANAGGVAVSGLEMAQNSAR.I</b> <a href="#">8727</a> <a href="#">8732</a>                                           |
| <a href="#">10771</a> | 713.6615         | 2137.9627        | 2136.0270        | 1.9357         | 2    | 7          | 24             | 1    | K.NALTGLNMGGGKGGSDFPKPKK.S                                                                                          |
| <a href="#">11626</a> | <b>1128.6706</b> | <b>2255.3267</b> | <b>2257.1565</b> | <b>-1.8298</b> | 1    | 0          | <b>1.2e+02</b> | 1    | <b>K.FLGFEQIFKNALTGLNMGGGK.G</b>                                                                                    |
| <a href="#">12119</a> | 775.4089         | 2323.2047        | 2323.2284        | -0.0237        | 2    | 17         | 2.5            | 1    | K.ESFAGKRVAISGSGNVAQYAALK.V <a href="#">12123</a> <a href="#">12131</a> <a href="#">12132</a> <a href="#">12134</a> |
| <a href="#">12379</a> | 790.7715         | 2369.2927        | 2367.2070        | 2.0857         | 2    | 16         | 3.3            | 1    | K.ELASTLENSTLFQKNPEYRK.A                                                                                            |
| <a href="#">12664</a> | 804.1882         | 2409.5427        | 2408.1067        | 1.4361         | 0    | 63         | 5.8e-05        | 1    | K.FIAEGSNMGSTQDAIDIFEHR.E <a href="#">12670</a>                                                                     |
| <a href="#">12791</a> | 809.3639         | 2425.0697        | 2424.1016        | 0.9681         | 0    | (18)       | 1.9            | 1    | K.FIAEGSNMGSTQDAIDIFEHR.E                                                                                           |
| <a href="#">14933</a> | <b>1394.0221</b> | <b>2786.0297</b> | <b>2785.3440</b> | <b>0.6857</b>  | 0    | <b>104</b> | <b>4e-09</b>   | 1    | <b>K.VDIALPSATQNEVSGEEAQLIDAGCK.F</b>                                                                               |

41. [gi|220691727|gb|EED48075.1|](#) Mass: 81578 Score: 518 Queries matched: 59 emPAI: 0.43

NADH-ubiquinone oxidoreductase, subunit G, putative [Aspergillus flavus NRRL3357]

| Query | Observed | Mr(expt) | Mr(calc) | Delta | Miss | Score | Expect | Rank | Peptide |
|-------|----------|----------|----------|-------|------|-------|--------|------|---------|
|-------|----------|----------|----------|-------|------|-------|--------|------|---------|

|                       |                  |                  |                  |                |          |            |                |          |                                                                                                                            |
|-----------------------|------------------|------------------|------------------|----------------|----------|------------|----------------|----------|----------------------------------------------------------------------------------------------------------------------------|
| <a href="#">444</a>   | <b>440.3491</b>  | <b>878.6837</b>  | <b>879.4450</b>  | <b>-0.7613</b> | <b>0</b> | <b>11</b>  | <b>14</b>      | <b>4</b> | <b>R.SFATTTTPR.L</b>                                                                                                       |
| <a href="#">734</a>   | 969.6090         | 968.6017         | 968.6131         | -0.0114        | 1        | 15         | 4.7            | 4        | R.LTTPLIRR.E <a href="#">732</a> <a href="#">735</a> <a href="#">737</a> <a href="#">738</a>                               |
| <a href="#">1395</a>  | <b>554.2501</b>  | <b>1106.4857</b> | <b>1106.5100</b> | <b>-0.0243</b> | <b>0</b> | <b>12</b>  | <b>10</b>      | <b>1</b> | <b>R.MEEISPVMR.R</b>                                                                                                       |
| <a href="#">1884</a>  | 599.5761         | 1197.1377        | 1197.7193        | -0.5816        | 1        | 12         | 9.8            | 3        | K.TQRLTTPLIR.R <a href="#">1882</a> <a href="#">1899</a>                                                                   |
| <a href="#">2297</a>  | <b>631.5646</b>  | <b>1261.1147</b> | <b>1260.5638</b> | <b>0.5509</b>  | <b>1</b> | <b>7</b>   | <b>34</b>      | <b>5</b> | <b>R.CIHCTRCVR.F</b> <a href="#">2303</a>                                                                                  |
| <a href="#">2907</a>  | 664.9256         | 1327.8367        | 1328.7234        | -0.8867        | 1        | 1          | 1.3e+02        | 9        | K.NIGPLVKTSMNR.C                                                                                                           |
| <a href="#">3300</a>  | <b>684.8856</b>  | <b>1367.7567</b> | <b>1367.6391</b> | <b>0.1176</b>  | <b>0</b> | <b>5</b>   | <b>45</b>      | <b>7</b> | <b>R.GNDMQIGTYLEK.N</b>                                                                                                    |
| <a href="#">3649</a>  | <b>703.7666</b>  | <b>1405.5187</b> | <b>1403.7772</b> | <b>1.7415</b>  | <b>2</b> | <b>2</b>   | <b>1e+02</b>   | <b>3</b> | <b>R.QKLQKENEFK.A</b>                                                                                                      |
| <a href="#">3912</a>  | 719.7571         | 1437.4997        | 1437.7147        | -0.2150        | 2        | 8          | 22             | 2        | K.SRFACDGLKTQR.L <a href="#">3900</a>                                                                                      |
| <a href="#">4056</a>  | <b>485.4405</b>  | <b>1453.2997</b> | <b>1450.6228</b> | <b>2.6770</b>  | <b>1</b> | <b>4</b>   | <b>59</b>      | <b>9</b> | <b>K.TSMNRCIHCTR.C</b>                                                                                                     |
| <a href="#">4429</a>  | 500.6079         | 1498.8017        | 1496.8423        | 1.9594         | 1        | 11         | 11             | 3        | R.VQVTRAATSLPGAAR.D <a href="#">4428</a>                                                                                   |
| <a href="#">5064</a>  | 522.0459         | 1563.1157        | 1560.7817        | 2.3340         | 0        | 9          | 18             | 2        | K.VSVEAGSALIQACEK.A                                                                                                        |
| <a href="#">5530</a>  | <b>803.6986</b>  | <b>1605.3827</b> | <b>1604.7617</b> | <b>0.6210</b>  | <b>0</b> | <b>52</b>  | <b>0.001</b>   | <b>1</b> | <b>R.FMNDVAGAPELGTAGR.G</b> <a href="#">5543</a>                                                                           |
| <a href="#">5760</a>  | <b>812.5346</b>  | <b>1623.0547</b> | <b>1620.7566</b> | <b>2.2981</b>  | <b>0</b> | <b>(6)</b> | <b>38</b>      | <b>1</b> | <b>R.FMNDVAGAPELGTAGR.G</b>                                                                                                |
| <a href="#">6625</a>  | 844.2856         | 1686.5567        | 1685.8988        | 0.6579         | 0        | 100        | 1.4e-08        | 1        | R.GAQLADVVLPGAAFTEK.S                                                                                                      |
| <a href="#">8882</a>  | <b>954.0136</b>  | <b>1906.0127</b> | <b>1904.9632</b> | <b>1.0495</b>  | <b>0</b> | <b>66</b>  | <b>3.2e-05</b> | <b>1</b> | <b>K.FVPATWEQALTEISSAR.Q</b> <a href="#">8877</a> <a href="#">8880</a> <a href="#">8884</a>                                |
| <a href="#">9532</a>  | 995.6631         | 1989.3117        | 1989.0830        | 0.2288         | 2        | 10         | 13             | 4        | R.FACDGLKTQRLTTPLIR.R <a href="#">9534</a>                                                                                 |
| <a href="#">10971</a> | <b>1082.8971</b> | <b>2163.7797</b> | <b>2163.0735</b> | <b>0.7062</b>  | <b>0</b> | <b>64</b>  | <b>5.6e-05</b> | <b>1</b> | <b>R.ATSEFLDVPLPYDDIEALR.D</b> <a href="#">10976</a>                                                                       |
| <a href="#">11191</a> | <b>731.7142</b>  | <b>2192.1207</b> | <b>2191.1161</b> | <b>1.0046</b>  | <b>0</b> | <b>45</b>  | <b>0.0042</b>  | <b>1</b> | <b>R.AAAYEVGFTPSPEVAQTKPK.M</b> <a href="#">11187</a>                                                                      |
| <a href="#">11410</a> | <b>741.7275</b>  | <b>2222.1607</b> | <b>2222.1841</b> | <b>-0.0234</b> | <b>1</b> | <b>4</b>   | <b>52</b>      | <b>4</b> | <b>K.LASAKRPMIIVGSAAAEHADAK.A</b> <a href="#">11412</a>                                                                    |
| <a href="#">12437</a> | <b>792.6655</b>  | <b>2374.9747</b> | <b>2374.1877</b> | <b>0.7870</b>  | <b>0</b> | <b>35</b>  | <b>0.039</b>   | <b>1</b> | <b>K.LGSDNLALDQPGGSSPIAHGVDVR.S</b>                                                                                        |
| <a href="#">12861</a> | <b>812.7009</b>  | <b>2435.0807</b> | <b>2434.2016</b> | <b>0.8791</b>  | <b>1</b> | <b>28</b>  | <b>0.19</b>    | <b>1</b> | <b>R.ATSEFLDVPLPYDDIEALRDR.M</b> <a href="#">12881</a>                                                                     |
| <a href="#">14383</a> | <b>1335.8946</b> | <b>2669.7747</b> | <b>2667.4166</b> | <b>2.3581</b>  | <b>2</b> | <b>10</b>  | <b>12</b>      | <b>1</b> | <b>K.FGEKLASAKRPMIIVGSAAAEHADAK.A</b> <a href="#">14349</a> <a href="#">14362</a>                                          |
| <a href="#">14743</a> | <b>913.1652</b>  | <b>2736.4737</b> | <b>2738.3619</b> | <b>-1.8882</b> | <b>2</b> | <b>17</b>  | <b>2.1</b>     | <b>1</b> | <b>R.MEEISPVMRRYDVVEPTSLGSLSK.I</b>                                                                                        |
| <a href="#">14760</a> | <b>914.2485</b>  | <b>2739.7237</b> | <b>2738.3619</b> | <b>1.3618</b>  | <b>2</b> | <b>(4)</b> | <b>40</b>      | <b>1</b> | <b>R.MEEISPVMRRYDVVEPTSLGSLSK.I</b> <a href="#">14744</a> <a href="#">14746</a> <a href="#">14748</a> <a href="#">1474</a> |
| <a href="#">15318</a> | <b>979.9725</b>  | <b>2936.8957</b> | <b>2935.4749</b> | <b>1.4208</b>  | <b>0</b> | <b>106</b> | <b>2.5e-09</b> | <b>1</b> | <b>K.NLDSELSGNVIDLCPVGALTSKPYAFR.A</b> <a href="#">15316</a>                                                               |
| <a href="#">15551</a> | 1016.3752        | 3046.1037        | 3043.5801        | 2.5237         | 1        | 5          | 36             | 2        | K.RPMIIVGSAAAEHADAKAIFETVGSFVEK.H                                                                                          |
| <a href="#">15611</a> | 1021.5755        | 3061.7047        | 3059.5750        | 2.1297         | 1        | (2)        | 67             | 4        | K.RPMIIVGSAAAEHADAKAIFETVGSFVEK.H                                                                                          |

42. [gi|220693675|gb|EED50020.1|](#) Mass: 21942 Score: 518 Queries matched: 35 emPAI: 2.11

60S ribosomal protein L6 [Aspergillus flavus NRRL3357]

| Query                | Observed        | Mr(expt)         | Mr(calc)         | Delta          | Miss     | Score     | Expect         | Rank     | Peptide                                                                                                      |
|----------------------|-----------------|------------------|------------------|----------------|----------|-----------|----------------|----------|--------------------------------------------------------------------------------------------------------------|
| <a href="#">535</a>  | <b>910.8100</b> | <b>909.8027</b>  | <b>909.4920</b>  | <b>0.3108</b>  | <b>0</b> | <b>32</b> | <b>0.085</b>   | <b>1</b> | <b>R.YVIATSTR.I</b> <a href="#">533</a>                                                                      |
| <a href="#">1137</a> | <b>529.5761</b> | <b>1057.1377</b> | <b>1056.5128</b> | <b>0.6249</b>  | <b>0</b> | <b>23</b> | <b>0.92</b>    | <b>1</b> | <b>K.VSTPDYFTK.E</b> <a href="#">1139</a>                                                                    |
| <a href="#">1200</a> | 535.7456        | 1069.4767        | 1067.6927        | 1.7840         | 2        | 10        | 14             | 5        | R.KAVRPTKLR.E <a href="#">1183</a> <a href="#">1191</a>                                                      |
| <a href="#">1641</a> | <b>573.2896</b> | <b>1144.5647</b> | <b>1143.6499</b> | <b>0.9148</b>  | <b>0</b> | <b>61</b> | <b>0.00014</b> | <b>1</b> | <b>K.AIDQSILASVK.K</b> <a href="#">1637</a>                                                                  |
| <a href="#">1693</a> | 580.2206        | 1158.4267        | 1159.6309        | -1.2042        | 2        | 1         | 1.3e+02        | 6        | K.KVASARASDQK.A                                                                                              |
| <a href="#">3118</a> | 676.3086        | 1350.6027        | 1349.7415        | 0.8612         | 1        | 4         | 66             | 3        | R.VNARYVIATSTR.I                                                                                             |
| <a href="#">3366</a> | <b>687.8106</b> | <b>1373.6067</b> | <b>1373.7038</b> | <b>-0.0971</b> | <b>0</b> | <b>77</b> | <b>3.2e-06</b> | <b>1</b> | <b>R.IDISGVDAQTVEK.V</b> <a href="#">3370</a> <a href="#">3376</a> <a href="#">3380</a> <a href="#">3403</a> |
| <a href="#">4672</a> | <b>763.3096</b> | <b>1524.6047</b> | <b>1522.8508</b> | <b>1.7539</b>  | <b>0</b> | <b>76</b> | <b>3.5e-06</b> | <b>1</b> | <b>K.HLDQGVLLVTGPFK.I</b> <a href="#">4642</a> <a href="#">4662</a>                                          |

|                       |                          |                           |                           |                         |                   |                    |                         |                   |                                               |                      |                      |                      |                      |                      |                      |                      |
|-----------------------|--------------------------|---------------------------|---------------------------|-------------------------|-------------------|--------------------|-------------------------|-------------------|-----------------------------------------------|----------------------|----------------------|----------------------|----------------------|----------------------|----------------------|----------------------|
| <a href="#">5228</a>  | <a href="#">790.9141</a> | <a href="#">1579.8137</a> | <a href="#">1579.9297</a> | <a href="#">-0.1160</a> | <a href="#">0</a> | <a href="#">74</a> | <a href="#">5.8e-06</a> | <a href="#">1</a> | <a href="#">R.ESLQPGTILILLAGR.F</a>           | <a href="#">5209</a> | <a href="#">5213</a> | <a href="#">5234</a> | <a href="#">5235</a> | <a href="#">5238</a> | <a href="#">5241</a> | <a href="#">5262</a> |
| <a href="#">6405</a>  | <a href="#">837.0396</a> | <a href="#">1672.0647</a> | <a href="#">1672.8995</a> | <a href="#">-0.8348</a> | <a href="#">1</a> | <a href="#">1</a>  | <a href="#">1.1e+02</a> | <a href="#">4</a> | <a href="#">R.ASDQKAIDQSILASVK.K</a>          |                      |                      |                      |                      |                      |                      |                      |
| <a href="#">8187</a>  | <a href="#">917.2371</a> | <a href="#">1832.4597</a> | <a href="#">1831.9468</a> | <a href="#">0.5129</a>  | <a href="#">1</a> | <a href="#">46</a> | <a href="#">0.0037</a>  | <a href="#">1</a> | <a href="#">K.KENFLGSYLASTFSLR.N</a>          | <a href="#">8165</a> | <a href="#">8179</a> |                      |                      |                      |                      |                      |
| <a href="#">8338</a>  | <a href="#">926.0856</a> | <a href="#">1850.1567</a> | <a href="#">1849.1149</a> | <a href="#">1.0418</a>  | <a href="#">1</a> | <a href="#">29</a> | <a href="#">0.2</a>     | <a href="#">1</a> | <a href="#">K.LRESLQPGTILILLAGR.F</a>         |                      |                      |                      |                      |                      |                      |                      |
| <a href="#">10905</a> | <a href="#">718.8369</a> | <a href="#">2153.4887</a> | <a href="#">2152.2844</a> | <a href="#">1.2043</a>  | <a href="#">2</a> | <a href="#">2</a>  | <a href="#">73</a>      | <a href="#">5</a> | <a href="#">K.LRESLQPGTILILLAGRFR.G</a>       |                      |                      |                      |                      |                      |                      |                      |
| <a href="#">15192</a> | <a href="#">957.7245</a> | <a href="#">2870.1517</a> | <a href="#">2868.4228</a> | <a href="#">1.7289</a>  | <a href="#">2</a> | <a href="#">4</a>  | <a href="#">42</a>      | <a href="#">7</a> | <a href="#">K.KENFLGSYLASTFSLRNGDKPHEMK.W</a> |                      |                      |                      |                      |                      |                      |                      |

43. [gi|220697586|gb|EED53927.1|](#) Mass: 37155 Score: 504 Queries matched: 61 emPAI: 2.30

outer mitochondrial membrane protein porin [Aspergillus flavus NRRL3357]

| Query                 | Observed  | Mr(expt)  | Mr(calc)  | Delta   | Miss | Score | Expect  | Rank | Peptide                                                                                                                                                    |
|-----------------------|-----------|-----------|-----------|---------|------|-------|---------|------|------------------------------------------------------------------------------------------------------------------------------------------------------------|
| <a href="#">113</a>   | 723.4480  | 722.4407  | 721.4123  | 1.0285  | 0    | 16    | 3.3     | 10   | K.IFLSSR.I                                                                                                                                                 |
| <a href="#">163</a>   | 379.5366  | 757.0587  | 756.4283  | 0.6305  | 0    | 32    | 0.13    | 1    | K.VNLHFK.Q <a href="#">162</a>                                                                                                                             |
| <a href="#">382</a>   | 430.1451  | 858.2757  | 857.4606  | 0.8151  | 0    | 61    | 0.00016 | 1    | K.AANDLLNK.D <a href="#">374</a> <a href="#">376</a> <a href="#">380</a>                                                                                   |
| <a href="#">401</a>   | 432.8291  | 863.6437  | 863.4389  | 0.2049  | 0    | 33    | 0.077   | 1    | R.LDPSSFAK.A <a href="#">396</a> <a href="#">397</a> <a href="#">402</a>                                                                                   |
| <a href="#">817</a>   | 493.8641  | 985.7137  | 985.5192  | 0.1945  | 0    | 66    | 5.1e-05 | 1    | R.VNAQVEAGAK.A <a href="#">813</a> <a href="#">815</a> <a href="#">820</a> <a href="#">822</a> <a href="#">826</a> <a href="#">834</a> <a href="#">836</a> |
| <a href="#">1063</a>  | 523.5981  | 1045.1817 | 1045.5556 | -0.3739 | 0    | 25    | 0.52    | 1    | K.APNGVTFNVK.G <a href="#">1080</a> <a href="#">1082</a> <a href="#">1083</a>                                                                              |
| <a href="#">1714</a>  | 581.6906  | 1161.3667 | 1160.6037 | 0.7630  | 0    | 59    | 0.00021 | 1    | K.TGNSVGLVASK.Y <a href="#">1711</a> <a href="#">1712</a> <a href="#">1713</a>                                                                             |
| <a href="#">2307</a>  | 631.7026  | 1261.3907 | 1260.6826 | 0.7081  | 1    | 24    | 0.66    | 1    | K.SKAPNGVTFNVK.G <a href="#">2313</a>                                                                                                                      |
| <a href="#">2456</a>  | 639.3406  | 1276.6667 | 1276.6663 | 0.0004  | 0    | 38    | 0.028   | 1    | K.AEILTQYQPSK.Q <a href="#">2452</a> <a href="#">2453</a> <a href="#">2458</a> <a href="#">2484</a>                                                        |
| <a href="#">2770</a>  | 657.6026  | 1313.1907 | 1312.6986 | 0.4921  | 0    | 75    | 4.9e-06 | 1    | K.LELDNNIANGLK.A <a href="#">2772</a> <a href="#">2781</a> <a href="#">2783</a> <a href="#">2794</a>                                                       |
| <a href="#">3544</a>  | 697.6631  | 1393.3117 | 1392.6997 | 0.6120  | 0    | 63    | 7.9e-05 | 1    | K.NAHEGPIAGSLEAK.Y <a href="#">3538</a> <a href="#">3553</a> <a href="#">3555</a> <a href="#">3564</a> <a href="#">3567</a>                                |
| <a href="#">4169</a>  | 734.6446  | 1467.2747 | 1466.7041 | 0.5706  | 0    | 59    | 0.00018 | 1    | K.DFYHTSAASLEVK.S <a href="#">4172</a> <a href="#">4173</a> <a href="#">4177</a> <a href="#">4179</a> <a href="#">4182</a> <a href="#">4185</a>            |
| <a href="#">8241</a>  | 921.1871  | 1840.3597 | 1840.8600 | -0.5003 | 0    | 0     | 1.4e+02 | 10   | R.SMFAFSCGQVLSHNIK.I                                                                                                                                       |
| <a href="#">11996</a> | 770.1469  | 2307.4187 | 2306.1542 | 1.2645  | 1    | 29    | 0.16    | 1    | K.AANDLLNKDFYHTSAASLEVK.S                                                                                                                                  |
| <a href="#">16339</a> | 1148.9105 | 3443.7097 | 3441.6629 | 2.0468  | 0    | 32    | 0.058   | 1    | K.YSAAIGYVQYSAAITASNNLSVFAASYHR.V <a href="#">16335</a> <a href="#">16336</a> <a href="#">16</a>                                                           |

44. [gi|220699460|gb|EED55799.1|](#) Mass: 60491 Score: 500 Queries matched: 31 emPAI: 0.89

phosphoglucomutase PgmA [Aspergillus flavus NRRL3357]

| Query                | Observed | Mr(expt)  | Mr(calc)  | Delta   | Miss | Score | Expect  | Rank | Peptide                                                     |
|----------------------|----------|-----------|-----------|---------|------|-------|---------|------|-------------------------------------------------------------|
| <a href="#">398</a>  | 432.7596 | 863.5047  | 862.4661  | 1.0386  | 0    | 14    | 6.3     | 3    | K.QGVYGLAR.S <a href="#">399</a>                            |
| <a href="#">1421</a> | 556.2841 | 1110.5537 | 1110.5306 | 0.0231  | 0    | 43    | 0.0083  | 1    | K.DSFVGSSTVSGR.K                                            |
| <a href="#">1546</a> | 566.0566 | 1130.0987 | 1127.5863 | 2.5125  | 0    | 8     | 27      | 1    | K.FGLTASEYLK.D                                              |
| <a href="#">1609</a> | 570.4266 | 1138.8387 | 1138.5910 | 0.2477  | 0    | 35    | 0.051   | 1    | K.EIFDFDLIK.E <a href="#">1611</a>                          |
| <a href="#">2591</a> | 431.5535 | 1291.6387 | 1290.6490 | 0.9898  | 0    | 12    | 10      | 10   | R.SMPTSGAVDLVAK.A <a href="#">2571</a> <a href="#">2583</a> |
| <a href="#">2946</a> | 666.6691 | 1331.3237 | 1331.6332 | -0.3095 | 1    | 11    | 15      | 1    | K.FFCNLFDNKK.I                                              |
| <a href="#">3734</a> | 709.7171 | 1417.4197 | 1416.7976 | 0.6221  | 0    | 102   | 9e-09   | 1    | K.DNVALALSLLNFK.E <a href="#">3741</a>                      |
| <a href="#">4862</a> | 773.0296 | 1544.0447 | 1544.7619 | -0.7171 | 1    | 2     | 92      | 7    | K.MMKEIFDFDLIK.E                                            |
| <a href="#">5066</a> | 782.6336 | 1563.2527 | 1562.7729 | 0.4798  | 0    | 60    | 0.00017 | 1    | K.AQGLQSYEVPTGWK.F                                          |
| <a href="#">5318</a> | 794.8286 | 1587.6427 | 1586.9104 | 0.7323  | 1    | 4     | 57      | 2    | R.IIVRLSGTGSSGATIR.L                                        |

|                       |           |           |           |         |   |    |         |    |                                                                                             |
|-----------------------|-----------|-----------|-----------|---------|---|----|---------|----|---------------------------------------------------------------------------------------------|
| <a href="#">6466</a>  | 839.0966  | 1676.1787 | 1674.8213 | 1.3574  | 0 | 45 | 0.0048  | 1  | K.YNLSNGAPAPETVTNK.I                                                                        |
| <a href="#">8465</a>  | 621.7109  | 1862.1107 | 1862.8581 | -0.7474 | 0 | 2  | 81      | 10 | K.ISICGEESFGTGSNHIR.E                                                                       |
| <a href="#">9148</a>  | 970.3336  | 1938.6527 | 1936.1105 | 2.5422  | 0 | 38 | 0.022   | 1  | K.LLVGQNGILSTPAASNLIR.V <a href="#">9144</a>                                                |
| <a href="#">9816</a>  | 675.2065  | 2022.5977 | 2021.9946 | 0.6031  | 0 | 12 | 8.4     | 1  | K.TYGPLEVEVVHSTSDYVK.M                                                                      |
| <a href="#">9904</a>  | 678.1889  | 2031.5447 | 2030.9797 | 0.5650  | 1 | 21 | 0.94    | 1  | R.KVTDVGNFSYTDLDGVSVK.N                                                                     |
| <a href="#">11439</a> | 743.0779  | 2226.2117 | 2226.2048 | 0.0069  | 2 | 5  | 37      | 3  | R.YYNPEAIQKIAKISAAYGVK.K                                                                    |
| <a href="#">11940</a> | 1151.3846 | 2300.7547 | 2300.1423 | 0.6124  | 0 | 83 | 7e-07   | 1  | K.TLTSYNYAEIPELDLSSIGSK.T <a href="#">11950</a> <a href="#">11952</a> <a href="#">11958</a> |
| <a href="#">13676</a> | 848.8212  | 2543.4417 | 2542.2638 | 1.1779  | 0 | 53 | 0.00058 | 1  | R.NMIYGANTFVSPGDSLAIISHHAK.L <a href="#">13679</a>                                          |
| <a href="#">13711</a> | 851.1175  | 2550.3307 | 2550.2139 | 0.1168  | 0 | 44 | 0.0048  | 1  | K.EKPDQTPSIASIQNDFWQAYGR.T <a href="#">13719</a>                                            |
| <a href="#">14374</a> | 1335.6166 | 2669.2187 | 2667.3796 | 1.8392  | 0 | 47 | 0.0023  | 1  | K.VFQPNYSESFITSILLSIPEGAK.D                                                                 |

45. [gi|220696267|gb|EED52609.1|](#) Mass: 54923 Score: 496 Queries matched: 35 emPAI: 0.79

dihydrolipoamide dehydrogenase [Aspergillus flavus NRRL3357]

| Query                 | Observed  | Mr(expt)  | Mr(calc)  | Delta   | Miss | Score | Expect  | Rank | Peptide                                                                                              |
|-----------------------|-----------|-----------|-----------|---------|------|-------|---------|------|------------------------------------------------------------------------------------------------------|
| <a href="#">260</a>   | 816.4530  | 815.4457  | 815.4389  | 0.0068  | 0    | 30    | 0.2     | 1    | R.GIEVGDVK.L                                                                                         |
| <a href="#">356</a>   | 852.6610  | 851.6537  | 849.5185  | 2.1353  | 1    | 4     | 56      | 1    | R.TKVPHIR.V                                                                                          |
| <a href="#">504</a>   | 903.2820  | 902.2747  | 901.5498  | 0.7250  | 1    | 0     | 2e+02   | 8    | M.FRTLLPR.A                                                                                          |
| <a href="#">824</a>   | 987.5010  | 986.4937  | 986.4379  | 0.0559  | 0    | 2     | 1.2e+02 | 9    | K.EAAMATYSK.A                                                                                        |
| <a href="#">1016</a>  | 1035.5560 | 1034.5487 | 1034.5396 | 0.0091  | 0    | 4     | 68      | 3    | R.LVIDQEYR.T                                                                                         |
| <a href="#">1760</a>  | 586.5731  | 1171.1317 | 1170.6245 | 0.5073  | 0    | 53    | 0.00077 | 1    | K.GTGALVDPNTVK.V                                                                                     |
| <a href="#">1812</a>  | 592.1411  | 1182.2677 | 1181.5829 | 0.6848  | 0    | 7     | 33      | 8    | R.VGTFPFSANSR.A                                                                                      |
| <a href="#">2188</a>  | 416.7429  | 1247.2067 | 1247.6622 | -0.4555 | 1    | 8     | 29      | 4    | R.GRLVIDQEYR.T                                                                                       |
| <a href="#">2904</a>  | 664.8441  | 1327.6737 | 1327.7096 | -0.0358 | 0    | 63    | 7.7e-05 | 1    | K.VNLLEGGEQTLR.G <a href="#">2897</a> <a href="#">2905</a> <a href="#">2933</a> <a href="#">2939</a> |
| <a href="#">4250</a>  | 738.6541  | 1475.2937 | 1474.7272 | 0.5665  | 0    | 47    | 0.0035  | 1    | R.LGGTCLNVGCIPSK.S <a href="#">4253</a>                                                              |
| <a href="#">4661</a>  | 762.7481  | 1523.4817 | 1521.7562 | 1.7255  | 0    | 12    | 8.5     | 1    | K.AEEEEAVAAVEYITK.G <a href="#">4660</a>                                                             |
| <a href="#">4923</a>  | 775.5081  | 1549.0017 | 1546.7272 | 2.2745  | 0    | 14    | 5.4     | 1    | R.VVGDCCTFGPMLAHK.A                                                                                  |
| <a href="#">4990</a>  | 778.7491  | 1555.4837 | 1555.8821 | -0.3984 | 0    | 49    | 0.0017  | 1    | R.IITSTGALSLSQVVPK.K <a href="#">5009</a> <a href="#">5020</a>                                       |
| <a href="#">7590</a>  | 888.5876  | 1775.1607 | 1773.9261 | 1.2346  | 0    | 51    | 0.0011  | 1    | R.RPYTEGLGLENVGIEK.D                                                                                 |
| <a href="#">9212</a>  | 650.2955  | 1947.8647 | 1948.0881 | -0.2234 | 2    | 2     | 93      | 6    | K.AKDTSVEGLTKGIEFLK.K                                                                                |
| <a href="#">9678</a>  | 669.1322  | 2004.3747 | 2006.0329 | -1.6582 | 0    | 3     | 62      | 10   | K.MVVIGGGIIGLEMASVWSR.L                                                                              |
| <a href="#">10636</a> | 1060.3036 | 2118.5927 | 2118.1330 | 0.4598  | 1    | 0     | 1.3e+02 | 7    | K.KMVVIGGGIIGLEMASVWSR.L                                                                             |
| <a href="#">11063</a> | 726.0342  | 2175.0807 | 2174.0967 | 0.9840  | 1    | 42    | 0.0087  | 1    | R.RPYTEGLGLENVGIEKDER.G <a href="#">11074</a>                                                        |
| <a href="#">11257</a> | 1100.8251 | 2199.6357 | 2199.1423 | 0.4934  | 0    | 111   | 1.1e-09 | 1    | K.NILIATGSEATPFPLNIDEK.R <a href="#">11258</a>                                                       |
| <a href="#">12320</a> | 786.3455  | 2356.0147 | 2355.2434 | 0.7713  | 1    | 58    | 0.00017 | 1    | K.NILIATGSEATPFPLNIDEKR.I <a href="#">12319</a>                                                      |
| <a href="#">13788</a> | 853.9762  | 2558.9067 | 2557.3098 | 1.5969  | 0    | 28    | 0.17    | 1    | R.LGA EVT VVEFLNQIGGPGMDAEIAK.Q <a href="#">13786</a>                                                |
| <a href="#">13875</a> | 859.3862  | 2575.1367 | 2573.3047 | 1.8320  | 0    | (2)   | 70      | 5    | R.LGA EVT VVEFLNQIGGPGMDAEIAK.Q                                                                      |
| <a href="#">16321</a> | 1144.4185 | 3430.2337 | 3429.6452 | 0.5885  | 0    | 2     | 53      | 3    | K.GYGHVNYGVIPSVMYTHPEVAWVGQNEAEVK.A                                                                  |

46. [gi|220694939|gb|EED51282.1|](#) Mass: 46417 Score: 490 Queries matched: 36 emPAI: 0.86



translation elongation factor eEF-1 subunit gamma, putative [Aspergillus flavus NRRL3357]

| Query                 | Observed         | Mr(expt)         | Mr(calc)         | Delta          | Miss     | Score     | Expect         | Rank     | Peptide                                                                                                                  |
|-----------------------|------------------|------------------|------------------|----------------|----------|-----------|----------------|----------|--------------------------------------------------------------------------------------------------------------------------|
| <a href="#">73</a>    | 690.5590         | 689.5517         | 689.4225         | 0.1293         | 0        | 14        | 9.2            | 2        | R.GVFLVR.G <a href="#">72</a>                                                                                            |
| <a href="#">199</a>   | 782.4060         | 781.3987         | 780.3654         | 1.0334         | 0        | 11        | 11             | 6        | K.YNDELK.L                                                                                                               |
| <a href="#">375</a>   | 858.5070         | 857.4997         | 856.5382         | 0.9615         | 0        | 3         | 97             | 7        | R.TIAALVAAK.A                                                                                                            |
| <a href="#">978</a>   | <b>513.4456</b>  | <b>1024.8767</b> | <b>1024.4865</b> | <b>0.3902</b>  | <b>0</b> | <b>23</b> | <b>0.7</b>     | <b>1</b> | <b>K.AEEYSLWK.V</b> <a href="#">973</a>                                                                                  |
| <a href="#">2628</a>  | 648.7461         | 1295.4777        | 1294.7397        | 0.7380         | 2        | 18        | 2.4            | 2        | R.AFATVLDKKFR.S                                                                                                          |
| <a href="#">2812</a>  | 440.1899         | 1317.5477        | 1314.7507        | 2.7971         | 2        | 14        | 6.8            | 2        | K.KNVEEASKVALK.N <a href="#">2786</a>                                                                                    |
| <a href="#">3063</a>  | 673.3176         | 1344.6207        | 1343.7449        | 0.8759         | 2        | 10        | 19             | 10       | K.YTPPKKEEKPK.K                                                                                                          |
| <a href="#">3081</a>  | <b>674.6966</b>  | <b>1347.3787</b> | <b>1347.6248</b> | <b>-0.2461</b> | <b>0</b> | <b>24</b> | <b>0.69</b>    | <b>1</b> | <b>K.EYPWADGHVFK.-</b> <a href="#">3097</a>                                                                              |
| <a href="#">3182</a>  | 679.5691         | 1357.1237        | 1356.7150        | 0.4087         | 0        | 8         | 26             | 3        | K.HLTANTFLVGER.I                                                                                                         |
| <a href="#">4982</a>  | 518.9825         | 1553.9257        | 1551.7616        | 2.1641         | 1        | 2         | 85             | 8        | -.MAFGKIYGQPNNGR.T                                                                                                       |
| <a href="#">6256</a>  | <b>831.6856</b>  | <b>1661.3567</b> | <b>1660.8508</b> | <b>0.5060</b>  | <b>0</b> | <b>66</b> | <b>4.2e-05</b> | <b>1</b> | <b>K.LTFMANNLIGGFHAR.L</b> <a href="#">6258</a> <a href="#">6269</a> <a href="#">6288</a> <a href="#">6290</a>           |
| <a href="#">6463</a>  | 559.6155         | 1675.8247        | 1676.8457        | -1.0210        | 0        | (7)       | 31             | 6        | K.LTFMANNLIGGFHAR.L                                                                                                      |
| <a href="#">9605</a>  | <b>998.6456</b>  | <b>1995.2767</b> | <b>1994.9084</b> | <b>0.3683</b>  | <b>0</b> | <b>71</b> | <b>1.1e-05</b> | <b>1</b> | <b>K.YVDDMWAWDPVTVDGK.E</b> <a href="#">9604</a> <a href="#">9624</a>                                                    |
| <a href="#">10098</a> | 683.8792         | 2048.6157        | 2046.0745        | 2.5412         | 1        | 3         | 63             | 6        | K.EAAPAAAAEPKPEGEQKPK.H                                                                                                  |
| <a href="#">10341</a> | <b>693.4195</b>  | <b>2077.2367</b> | <b>2076.1367</b> | <b>1.1000</b>  | <b>1</b> | <b>45</b> | <b>0.0045</b>  | <b>1</b> | <b>K.HPLEALGKPDFILDDLKR.T</b> <a href="#">10346</a>                                                                      |
| <a href="#">10676</a> | <b>709.1609</b>  | <b>2124.4607</b> | <b>2123.0034</b> | <b>1.4573</b>  | <b>1</b> | <b>27</b> | <b>0.28</b>    | <b>1</b> | <b>R.KYVDDMWAWDPVTVDGK.E</b>                                                                                             |
| <a href="#">13144</a> | <b>1237.8821</b> | <b>2473.7497</b> | <b>2474.1431</b> | <b>-0.3933</b> | <b>0</b> | <b>76</b> | <b>3.1e-06</b> | <b>1</b> | <b>R.QQEFKPAFDVAPDWESYDFVK.L</b> <a href="#">13142</a> <a href="#">13154</a> <a href="#">13163</a> <a href="#">13171</a> |
| <a href="#">13465</a> | <b>839.3185</b>  | <b>2514.9337</b> | <b>2514.1968</b> | <b>0.7369</b>  | <b>0</b> | <b>58</b> | <b>0.00017</b> | <b>1</b> | <b>R.TYSNEDTRPVALPWFQNYK.A</b> <a href="#">13462</a> <a href="#">13466</a> <a href="#">13470</a>                         |

47. [gi|220693036|gb|EED49382.1|](#) Mass: 27511 Score: 465 Queries matched: 26 emPAI: 1.23

triosephosphate isomerase [Aspergillus flavus NRRL3357]

| Query                 | Observed        | Mr(expt)         | Mr(calc)         | Delta          | Miss     | Score      | Expect         | Rank     | Peptide                                                                                                                                        |
|-----------------------|-----------------|------------------|------------------|----------------|----------|------------|----------------|----------|------------------------------------------------------------------------------------------------------------------------------------------------|
| <a href="#">98</a>    | <b>716.2790</b> | <b>715.2717</b>  | <b>714.4024</b>  | <b>0.8693</b>  | <b>0</b> | <b>28</b>  | <b>0.37</b>    | <b>1</b> | <b>K.QLNAAAK.E</b>                                                                                                                             |
| <a href="#">219</a>   | <b>789.6330</b> | <b>788.6257</b>  | <b>788.4644</b>  | <b>0.1614</b>  | <b>0</b> | <b>38</b>  | <b>0.035</b>   | <b>1</b> | <b>K.TIEVVTK.Q</b> <a href="#">217</a>                                                                                                         |
| <a href="#">1109</a>  | <b>527.1441</b> | <b>1052.2737</b> | <b>1051.5550</b> | <b>0.7188</b>  | <b>0</b> | <b>29</b>  | <b>0.18</b>    | <b>1</b> | <b>R.IIYGGSVSEK.N</b>                                                                                                                          |
| <a href="#">3257</a>  | 682.7076        | 1363.4007        | 1363.7017        | -0.3010        | 0        | 8          | 24             | 2        | K.MNGTAESITAIK.N <a href="#">3258</a> <a href="#">3260</a> <a href="#">3261</a> <a href="#">3266</a> <a href="#">3276</a> <a href="#">3280</a> |
| <a href="#">3958</a>  | <b>482.0992</b> | <b>1443.2757</b> | <b>1442.7129</b> | <b>0.5628</b>  | <b>1</b> | <b>2</b>   | <b>1.1e+02</b> | <b>9</b> | <b>-.MPRQFFVGGNFK.M</b>                                                                                                                        |
| <a href="#">5489</a>  | <b>802.1671</b> | <b>1602.3197</b> | <b>1601.8817</b> | <b>0.4380</b>  | <b>0</b> | <b>102</b> | <b>9.6e-09</b> | <b>1</b> | <b>K.VVIAYEPVWAIGTGK.V</b> <a href="#">5495</a> <a href="#">5510</a> <a href="#">5522</a>                                                      |
| <a href="#">5744</a>  | <b>811.8551</b> | <b>1621.6957</b> | <b>1621.8536</b> | <b>-0.1579</b> | <b>0</b> | <b>78</b>  | <b>2.4e-06</b> | <b>1</b> | <b>K.VATTQQAQEVHAAIR.K</b> <a href="#">5752</a> <a href="#">5761</a> <a href="#">5765</a>                                                      |
| <a href="#">6242</a>  | 831.2621        | 1660.5097        | 1658.7900        | 1.7197         | 0        | 71         | 1.3e-05        | 1        | K.WLADAI SPEASENTR.I <a href="#">6239</a>                                                                                                      |
| <a href="#">9298</a>  | <b>653.8122</b> | <b>1958.4147</b> | <b>1956.1255</b> | <b>2.2892</b>  | <b>2</b> | <b>12</b>  | <b>9.4</b>     | <b>2</b> | <b>K.TIEVVTKQLNAAAKELTK.E</b>                                                                                                                  |
| <a href="#">12428</a> | <b>792.3649</b> | <b>2374.0727</b> | <b>2373.2693</b> | <b>0.8035</b>  | <b>0</b> | <b>64</b>  | <b>4.4e-05</b> | <b>1</b> | <b>R.DVDGFLVGGASLKPAFVDIINAR.L</b> <a href="#">12434</a>                                                                                       |
| <a href="#">13389</a> | 836.4572        | 2506.3497        | 2504.3308        | 2.0189         | 2        | 1          | 1e+02          | 5        | R.KVKAIDGGISVIFCIGETLEER.E                                                                                                                     |

48. [gi|220690395|gb|EED46744.1|](#) Mass: 29307 Score: 463 Queries matched: 27 emPAI: 1.63

40S ribosomal protein S3Ae [Aspergillus flavus NRRL3357]

| Query | Observed | Mr(expt) | Mr(calc) | Delta | Miss | Score | Expect | Rank | Peptide |
|-------|----------|----------|----------|-------|------|-------|--------|------|---------|
|-------|----------|----------|----------|-------|------|-------|--------|------|---------|

|                       |                 |                  |                  |                |          |           |               |          |                                                                                   |
|-----------------------|-----------------|------------------|------------------|----------------|----------|-----------|---------------|----------|-----------------------------------------------------------------------------------|
| <a href="#">413</a>   | 869.8110        | 868.8037         | 867.4338         | 1.3699         | 1        | 11        | 12            | 2        | R.KDEYSVK.A                                                                       |
| <a href="#">484</a>   | 449.0066        | 895.9987         | 895.5491         | 0.4496         | 0        | 15        | 4.1           | 3        | K.LIPEVIGR.E <a href="#">485</a>                                                  |
| <a href="#">537</a>   | 456.1766        | 910.3387         | 909.5324         | 0.8063         | 0        | 14        | 5.5           | 8        | R.LFAIAFTK.R                                                                      |
| <a href="#">582</a>   | <b>460.1971</b> | <b>918.3797</b>  | <b>918.4923</b>  | <b>-0.1126</b> | <b>0</b> | <b>51</b> | <b>0.0017</b> | <b>1</b> | <b>K.APSTFQIR.D</b>                                                               |
| <a href="#">610</a>   | 465.6791        | 929.3437         | 929.5406         | -0.1969        | 1        | 15        | 6.6           | 2        | R.SSQIRAIR.K                                                                      |
| <a href="#">867</a>   | 499.0231        | 996.0317         | 995.4924         | 0.5394         | 0        | 64        | 6e-05         | 1        | K.TTDDYLLR.L <a href="#">866</a>                                                  |
| <a href="#">1133</a>  | 529.3736        | 1056.7327        | 1056.5927        | 0.1400         | 1        | 37        | 0.034         | 1        | K.LRVDEIQGK.N <a href="#">1136</a>                                                |
| <a href="#">1891</a>  | 599.8401        | 1197.6657        | 1195.6053        | 2.0604         | 2        | 4         | 59            | 10       | R.KKMTEIMQR.E                                                                     |
| <a href="#">3676</a>  | <b>706.1306</b> | <b>1410.2467</b> | <b>1408.6868</b> | <b>1.5599</b>  | <b>0</b> | <b>76</b> | <b>4e-06</b>  | <b>1</b> | <b>R.EAASCTLSQLTK.L <a href="#">3670</a> <a href="#">3675</a></b>                 |
| <a href="#">4111</a>  | 487.7085        | 1460.1037        | 1459.7743        | 0.3294         | 2        | 9         | 18            | 3        | R.TSGLKNANDSLKGR.I                                                                |
| <a href="#">5584</a>  | 805.8016        | 1609.5887        | 1608.8736        | 0.7151         | 0        | 66        | 4e-05         | 1        | K.ATQGIYPLQNVHIR.K <a href="#">5570</a> <a href="#">5587</a> <a href="#">5590</a> |
| <a href="#">7674</a>  | 892.2816        | 1782.5487        | 1781.8043        | 0.7444         | 0        | 88        | 2.5e-07       | 1        | K.NCLTNFHHGLDFTTDK.L <a href="#">7692</a>                                         |
| <a href="#">9192</a>  | 649.2549        | 1944.7427        | 1944.9429        | -0.2002        | 0        | 17        | 2.6           | 1        | K.FDLGALLNLHGESTTDDK.G                                                            |
| <a href="#">10641</a> | 1060.7316       | 2119.4487        | 2118.0018        | 1.4469         | 0        | 90        | 1.1e-07       | 1        | R.IFEVSLADLQNDDEHAFR.K <a href="#">10650</a> <a href="#">10651</a>                |
| <a href="#">11575</a> | <b>750.4735</b> | <b>2248.3987</b> | <b>2246.0967</b> | <b>2.3020</b>  | <b>1</b> | <b>17</b> | <b>2.4</b>    | <b>1</b> | <b>R.IFEVSLADLQNDDEHAFRK.V</b>                                                    |
| <a href="#">13816</a> | 855.7022        | 2564.0847        | 2563.3031        | 0.7817         | 2        | 0         | 1.1e+02       | 9        | K.APKFDLALLNLHGESTTDDKGHK.V                                                       |

49. [gi|220701339|gb|EED57677.1|](#) Mass: 14785 Score: 440 Queries matched: 29 emPAI: 2.47

40S ribosomal protein S22 [Aspergillus flavus NRRL3357]

| Query                 | Observed  | Mr(expt)  | Mr(calc)  | Delta   | Miss | Score | Expect  | Rank | Peptide                                                                                            |
|-----------------------|-----------|-----------|-----------|---------|------|-------|---------|------|----------------------------------------------------------------------------------------------------|
| <a href="#">164</a>   | 760.4310  | 759.4237  | 758.4003  | 1.0234  | 0    | 12    | 15      | 1    | K.LLGFFY.-                                                                                         |
| <a href="#">189</a>   | 388.3561  | 774.6977  | 774.4388  | 0.2589  | 0    | 31    | 0.18    | 1    | R.YPVQLR.D                                                                                         |
| <a href="#">1369</a>  | 551.7171  | 1101.4197 | 1100.5978 | 0.8219  | 0    | 40    | 0.018   | 1    | K.WTTQLLPSR.Q <a href="#">1367</a>                                                                 |
| <a href="#">6850</a>  | 852.5461  | 1703.0777 | 1701.7383 | 1.3394  | 0    | 72    | 9.5e-06 | 1    | K.HGYIGEFEEVDDHR.S <a href="#">6823</a> <a href="#">6837</a> <a href="#">6846</a>                  |
| <a href="#">7000</a>  | 859.2551  | 1716.4957 | 1715.8690 | 0.6268  | 0    | 95    | 4.8e-08 | 1    | K.TSVLNDTLNAINNAEK.A <a href="#">6994</a> <a href="#">6998</a>                                     |
| <a href="#">9185</a>  | 648.7882  | 1943.3427 | 1943.0323 | 0.3104  | 1    | 2     | 93      | 3    | M.VKTSVLNDTLNAINNAEK.A                                                                             |
| <a href="#">11839</a> | 762.7409  | 2285.2007 | 2285.3657 | -0.1650 | 2    | 6     | 34      | 3    | R.QVLVRPSSKIVKFLSVMQK.H                                                                            |
| <a href="#">11946</a> | 768.2169  | 2301.6287 | 2301.3606 | 0.2681  | 2    | (2)   | 79      | 10   | R.QVLVRPSSKIVKFLSVMQK.H                                                                            |
| <a href="#">12282</a> | 783.7769  | 2348.3087 | 2346.2213 | 2.0875  | 2    | 7     | 24      | 2    | -.MVKTSVLNDTLNAINNAEKAGK.R                                                                         |
| <a href="#">13628</a> | 845.7562  | 2534.2467 | 2535.1853 | -0.9385 | 1    | (0)   | 1.1e+02 | 10   | K.FLSVMQKHGYIGEFEEVDDHR.S                                                                          |
| <a href="#">13750</a> | 852.2502  | 2553.7287 | 2551.1802 | 2.5485  | 1    | 38    | 0.019   | 1    | K.FLSVMQKHGYIGEFEEVDDHR.S                                                                          |
| <a href="#">15443</a> | 998.2539  | 2991.7397 | 2990.4960 | 1.2437  | 2    | 0     | 95      | 1    | K.VIVKFLSVMQKHGYIGEFEEVDDHR.S                                                                      |
| <a href="#">16060</a> | 1096.9525 | 3287.8357 | 3289.6554 | -1.8197 | 1    | 45    | 0.003   | 1    | K.WTTQLLPSRQFGFVLTTSAGIMDHEEAR.R <a href="#">16056</a> <a href="#">16057</a> <a href="#">16058</a> |

50. [gi|220701642|gb|EED57980.1|](#) Mass: 54187 Score: 435 Queries matched: 21 emPAI: 0.42

aspartyl aminopeptidase [Aspergillus flavus NRRL3357]

| Query                | Observed | Mr(expt)  | Mr(calc)  | Delta   | Miss | Score | Expect | Rank | Peptide         |
|----------------------|----------|-----------|-----------|---------|------|-------|--------|------|-----------------|
| <a href="#">207</a>  | 785.6930 | 784.6857  | 784.4807  | 0.2051  | 0    | 10    | 15     | 4    | R.IKPVSNK.R     |
| <a href="#">1919</a> | 603.3651 | 1204.7157 | 1206.6608 | -1.9451 | 0    | 3     | 91     | 9    | R.NSSTIVAFAGK.K |

|                       |           |           |           |         |   |    |         |    |                                                                                                   |
|-----------------------|-----------|-----------|-----------|---------|---|----|---------|----|---------------------------------------------------------------------------------------------------|
| <a href="#">4675</a>  | 763.4206  | 1524.8267 | 1524.8260 | 0.0007  | 0 | 61 | 0.00012 | 1  | R.TAQGADSNVLP <del>AI</del> IR.R <a href="#">4679</a>                                             |
| <a href="#">6554</a>  | 841.8516  | 1681.6887 | 1680.9271 | 0.7616  | 1 | 2  | 90      | 4  | R.TAQGADSNVLP <del>AI</del> IRR.L                                                                 |
| <a href="#">6945</a>  | 856.6951  | 1711.3757 | 1709.8447 | 1.5310  | 0 | 59 | 0.00018 | 1  | K.SCLGGLLEEFVFSR.L <a href="#">6948</a>                                                           |
| <a href="#">7117</a>  | 865.9111  | 1729.8077 | 1729.9363 | -0.1285 | 0 | 72 | 8.1e-06 | 1  | R.YATNSPGIVLLQEVAR.K <a href="#">7116</a>                                                         |
| <a href="#">7371</a>  | 879.6986  | 1757.3827 | 1755.9156 | 1.4672  | 0 | 61 | 0.00013 | 1  | K.AAEDGGEGVPLQLFVVR.N <a href="#">7383</a>                                                        |
| <a href="#">8248</a>  | 921.6561  | 1841.2977 | 1841.0047 | 0.2931  | 0 | 79 | 2e-06   | 1  | K.ETQLFP <del>IA</del> GLVAAELNR.T <a href="#">8262</a> <a href="#">8273</a> <a href="#">8276</a> |
| <a href="#">9895</a>  | 677.6825  | 2030.0257 | 2031.1153 | -1.0896 | 2 | 2  | 81      | 10 | K.YYLTRNSSTIVAF <del>AI</del> GKK.W                                                               |
| <a href="#">12365</a> | 789.6869  | 2366.0387 | 2367.1277 | -1.0890 | 2 | 2  | 84      | 5  | K.AGFQEI <del>KE</del> KDSWSSTCRPGGK.Y                                                            |
| <a href="#">13856</a> | 858.5289  | 2572.5647 | 2571.3122 | 1.2525  | 0 | 58 | 0.00021 | 1  | K.QPALDFLSFVNASPTPF <del>HA</del> VQSAK.E <a href="#">13860</a>                                   |
| <a href="#">15632</a> | 1023.7419 | 3068.2037 | 3069.4938 | -1.2901 | 1 | 6  | 28      | 4  | R.TLDLGNPQLS <del>M</del> HSIRETGGTYDVGH <del>S</del> IR.L <a href="#">15633</a>                  |

51. [gi|220699787|gb|EED56126.1|](#) Mass: 29357 Score: 434 Queries matched: 36 emPAI: 1.63

cytosolic large ribosomal subunit protein L7A [Aspergillus flavus NRRL3357]

| Query                 | Observed  | Mr(expt)  | Mr(calc)  | Delta   | Miss | Score | Expect  | Rank | Peptide                                                                                                  |
|-----------------------|-----------|-----------|-----------|---------|------|-------|---------|------|----------------------------------------------------------------------------------------------------------|
| <a href="#">10</a>    | 628.4500  | 627.4427  | 627.4068  | 0.0360  | 0    | 17    | 2.9     | 1    | K.ILNLR.L                                                                                                |
| <a href="#">43</a>    | 674.5310  | 673.5237  | 673.4374  | 0.0863  | 0    | 22    | 1.5     | 1    | K.LLSTIK.E <a href="#">44</a>                                                                            |
| <a href="#">861</a>   | 497.9031  | 993.7917  | 992.5365  | 1.2552  | 0    | 22    | 0.9     | 1    | K.MGV <del>P</del> YAI <del>V</del> K.G <a href="#">857</a>                                              |
| <a href="#">1130</a>  | 1057.2290 | 1056.2217 | 1055.4407 | 0.7810  | 0    | 26    | 0.41    | 1    | R.SEDQSEFSK.L                                                                                            |
| <a href="#">1382</a>  | 553.0941  | 1104.1737 | 1104.6365 | -0.4628 | 1    | (6)   | 41      | 3    | R.KMGV <del>P</del> YAI <del>V</del> K.G                                                                 |
| <a href="#">1479</a>  | 561.3846  | 1120.7547 | 1120.6314 | 0.1233  | 1    | 25    | 0.58    | 1    | R.KMGV <del>P</del> YAI <del>V</del> K.G                                                                 |
| <a href="#">1634</a>  | 572.5581  | 1143.1017 | 1142.6659 | 0.4358  | 0    | 95    | 6e-08   | 1    | K.TAAVLALTEVR.S <a href="#">1638</a>                                                                     |
| <a href="#">1879</a>  | 599.3251  | 1196.6357 | 1195.6197 | 1.0160  | 0    | 8     | 24      | 1    | R.LHAEATAVAEGK.K <a href="#">1873</a> <a href="#">1886</a>                                               |
| <a href="#">1989</a>  | 609.2716  | 1216.5287 | 1215.6248 | 0.9039  | 0    | 41    | 0.015   | 1    | R.NFGIGQDIQPK.R <a href="#">1986</a>                                                                     |
| <a href="#">2417</a>  | 637.7371  | 1273.4597 | 1270.7609 | 2.6989  | 1    | 10    | 19      | 5    | K.KTAAVLALTEVR.S                                                                                         |
| <a href="#">2935</a>  | 666.2486  | 1330.4827 | 1328.7088 | 1.7739  | 1    | 2     | 1.2e+02 | 4    | K.EDVSKKPYHVK.Y                                                                                          |
| <a href="#">3397</a>  | 1376.5880 | 1375.5807 | 1375.5892 | -0.0084 | 1    | 15    | 6       | 2    | K.EGYTDKYEESR.R <a href="#">3378</a> <a href="#">3385</a>                                                |
| <a href="#">3472</a>  | 693.8151  | 1385.6157 | 1383.7510 | 1.8647  | 1    | 6     | 37      | 1    | K.AAPLPYPQGKAGSK.K                                                                                       |
| <a href="#">3943</a>  | 721.6766  | 1441.3387 | 1440.7725 | 0.5662  | 0    | 56    | 0.00039 | 1    | K.YGLNHVVGLVENK.K                                                                                        |
| <a href="#">4109</a>  | 487.6112  | 1459.8117 | 1458.7579 | 1.0538  | 1    | 8     | 23      | 7    | R.SRNF <del>G</del> IGQDIQPK.R                                                                           |
| <a href="#">4474</a>  | 1503.8550 | 1502.8477 | 1501.8154 | 1.0324  | 2    | 5     | 53      | 5    | K.WPEYVRLQRQK.K                                                                                          |
| <a href="#">4843</a>  | 772.1856  | 1542.3567 | 1541.8202 | 0.5365  | 0    | 66    | 3.6e-05 | 1    | K.VPPAIAQFQSTLDR.N <a href="#">4841</a>                                                                  |
| <a href="#">5123</a>  | 785.7576  | 1569.5007 | 1568.8675 | 0.6333  | 1    | 41    | 0.012   | 1    | K.YGLNHVVGLVENKK.A <a href="#">5130</a> <a href="#">5132</a>                                             |
| <a href="#">7691</a>  | 892.6711  | 1783.3277 | 1782.9992 | 0.3285  | 1    | 82    | 8.1e-07 | 1    | R.LKVPPAIAQFQSTLDR.N <a href="#">7684</a> <a href="#">7686</a> <a href="#">7697</a> <a href="#">7712</a> |
| <a href="#">7845</a>  | 899.4841  | 1796.9537 | 1794.9311 | 2.0226  | 2    | 5     | 48      | 1    | R.HWGGGIMGAKAVARQEK.K                                                                                    |
| <a href="#">11083</a> | 727.1052  | 2178.2937 | 2180.0961 | -1.8023 | 1    | 3     | 71      | 4    | K.TAAVLALTEVRSEDQSEFSK.L                                                                                 |

52. [gi|220696418|gb|EED52760.1|](#) Mass: 72424 Score: 430 Queries matched: 36 emPAI: 0.36

mitochondrial Hsp70 chaperone (Ssc70), putative [Aspergillus flavus NRRL3357]

| Query | Observed | Mr(expt) | Mr(calc) | Delta | Miss | Score | Expect | Rank | Peptide |
|-------|----------|----------|----------|-------|------|-------|--------|------|---------|
|-------|----------|----------|----------|-------|------|-------|--------|------|---------|

|                       |           |           |           |         |   |    |         |   |                                                                                     |
|-----------------------|-----------|-----------|-----------|---------|---|----|---------|---|-------------------------------------------------------------------------------------|
| <a href="#">37</a>    | 671.4990  | 670.4917  | 670.4377  | 0.0540  | 0 | 13 | 8.8     | 1 | R.LVGIAAK.R                                                                         |
| <a href="#">837</a>   | 989.3990  | 988.3917  | 988.5488  | -0.1570 | 1 | 6  | 51      | 2 | -.MLPSRLTR.A                                                                        |
| <a href="#">2042</a>  | 614.1741  | 1226.3337 | 1225.6779 | 0.6559  | 0 | 71 | 1.3e-05 | 1 | K.DAGQIAGLNVLR.V                                                                    |
| <a href="#">3615</a>  | 701.4691  | 1400.9237 | 1401.8204 | -0.8967 | 2 | 10 | 18      | 6 | R.LTRALPRTAFTR.A                                                                    |
| <a href="#">3641</a>  | 703.2716  | 1404.5287 | 1401.8344 | 2.6944  | 2 | 4  | 71      | 1 | R.EKIAALREFVVK.N                                                                    |
| <a href="#">3732</a>  | 1418.3260 | 1417.3187 | 1416.7950 | 0.5238  | 2 | 4  | 70      | 2 | R.AAGLRVPSTSFRR.W                                                                   |
| <a href="#">3954</a>  | 722.3236  | 1442.6327 | 1441.7776 | 0.8551  | 0 | 64 | 6.3e-05 | 1 | R.SNLESLVDPLISR.T <a href="#">3938</a> <a href="#">3952</a> <a href="#">3972</a>    |
| <a href="#">4155</a>  | 733.2446  | 1464.4747 | 1462.7052 | 1.7695  | 0 | 89 | 1.9e-07 | 1 | R.TTPSVVGFAQDGER.L <a href="#">4146</a>                                             |
| <a href="#">4580</a>  | 759.3811  | 1516.7477 | 1518.7426 | -1.9949 | 2 | 1  | 1.3e+02 | 9 | R.RWNSTEGGEEKVK.G                                                                   |
| <a href="#">5384</a>  | 797.8286  | 1593.6427 | 1593.7886 | -0.1459 | 0 | 69 | 1.8e-05 | 1 | K.TDELQNASLTLFDK.M <a href="#">5412</a> <a href="#">5413</a>                        |
| <a href="#">6056</a>  | 824.2286  | 1646.4427 | 1644.8723 | 1.5705  | 0 | 90 | 1.6e-07 | 1 | R.VVNEPTAAALAYGLEK.E <a href="#">6033</a> <a href="#">6048</a> <a href="#">6054</a> |
| <a href="#">6176</a>  | 828.5896  | 1655.1647 | 1653.9162 | 1.2485  | 1 | 8  | 21      | 1 | R.QATKDAGQIAGLNVLR.V <a href="#">6160</a> <a href="#">6179</a>                      |
| <a href="#">6502</a>  | 840.8471  | 1679.6797 | 1679.8267 | -0.1470 | 0 | 44 | 0.0058  | 1 | K.NAVVTVPAYFNDSQR.Q <a href="#">6544</a>                                            |
| <a href="#">7566</a>  | 592.1409  | 1773.4007 | 1774.8996 | -1.4988 | 2 | 2  | 1e+02   | 4 | K.KESGLDLSGDRMAIQR.I                                                                |
| <a href="#">8287</a>  | 923.7176  | 1845.4207 | 1845.9618 | -0.5411 | 1 | 3  | 76      | 4 | K.MTRSNLESLVDPLISR.T <a href="#">8283</a>                                           |
| <a href="#">9548</a>  | 664.4942  | 1990.4607 | 1989.9830 | 0.4778  | 1 | 1  | 1e+02   | 9 | K.TDELQNASLTLFDKMHK.A                                                               |
| <a href="#">10206</a> | 1031.2446 | 2060.4747 | 2059.0620 | 1.4128  | 0 | 7  | 29      | 1 | K.GQVIGIDLGTNSAVAVMEGK.T                                                            |
| <a href="#">10214</a> | 687.9979  | 2060.9717 | 2058.9607 | 2.0110  | 0 | 18 | 2.1     | 1 | K.STNGDTHLGGEDFDINLVR.H <a href="#">10204</a>                                       |
| <a href="#">10859</a> | 1074.3056 | 2146.5967 | 2145.0736 | 1.5231  | 0 | 2  | 88      | 2 | K.DANLQASEIQDVILVGGMTR.M                                                            |
| <a href="#">12829</a> | 811.2712  | 2430.7917 | 2429.2584 | 1.5333  | 1 | 1  | 92      | 3 | K.GQVIGIDLGTNSAVAVMEGKTPR.I                                                         |
| <a href="#">12902</a> | 814.5692  | 2440.6857 | 2441.2948 | -0.6091 | 1 | 2  | 65      | 6 | K.ALKDANLQASEIQDVILVGGMTR.M                                                         |
| <a href="#">15046</a> | 943.8649  | 2828.5727 | 2829.4728 | -0.9001 | 2 | 2  | 70      | 2 | K.ALKDANLQASEIQDVILVGGMTRMPK.V                                                      |

53. [gi|220701635|gb|EED57973.1|](#) Mass: 43824 Score: 429 Queries matched: 30 emPAI: 0.92

inorganic diphosphatase, putative [Aspergillus flavus NRRL3357]

| Query                 | Observed  | Mr(expt)  | Mr(calc)  | Delta   | Miss | Score | Expect  | Rank | Peptide                                                                  |
|-----------------------|-----------|-----------|-----------|---------|------|-------|---------|------|--------------------------------------------------------------------------|
| <a href="#">242</a>   | 403.7141  | 805.4137  | 804.4970  | 0.9167  | 0    | 18    | 3.3     | 1    | R.HLPGLLR.A <a href="#">241</a>                                          |
| <a href="#">395</a>   | 432.7376  | 863.4607  | 862.4912  | 0.9695  | 0    | 36    | 0.046   | 1    | K.YALEVIR.E <a href="#">392</a> <a href="#">393</a>                      |
| <a href="#">1294</a>  | 544.6201  | 1087.2257 | 1087.5146 | -0.2888 | 0    | 68    | 2.9e-05 | 1    | K.LNDVEDVER.H <a href="#">1300</a>                                       |
| <a href="#">3338</a>  | 457.9775  | 1370.9107 | 1370.6864 | 0.2243  | 0    | 13    | 8.8     | 2    | -.MFLGSSSTSLVSR.L <a href="#">3346</a>                                   |
| <a href="#">3536</a>  | 697.2861  | 1392.5577 | 1391.8024 | 0.7553  | 0    | 66    | 4.1e-05 | 1    | K.VIVIDVNDPLAPK.L <a href="#">3537</a>                                   |
| <a href="#">8316</a>  | 925.2056  | 1848.3967 | 1846.9023 | 1.4945  | 0    | 87    | 2.8e-07 | 1    | K.VLGVMALLDEEETDWK.V <a href="#">8329</a>                                |
| <a href="#">9710</a>  | 670.7529  | 2009.2367 | 2008.1541 | 1.0826  | 2    | 1     | 1.1e+02 | 8    | R.TAPLNRLSTASPIVARVSR.T                                                  |
| <a href="#">12142</a> | 776.2859  | 2325.8357 | 2323.3223 | 2.5134  | 2    | 6     | 32      | 1    | R.LSTASPIVARVSRSTSATLAPPTK.Q <a href="#">12128</a> <a href="#">12146</a> |
| <a href="#">12430</a> | 1188.2586 | 2374.5027 | 2373.1159 | 1.3869  | 0    | 79    | 1.4e-06 | 1    | K.GDNDPLDVCEIGELVGYPGQVK.Q <a href="#">12429</a> <a href="#">12433</a>   |
| <a href="#">13842</a> | 857.7149  | 2570.1227 | 2569.2635 | 0.8593  | 2    | 5     | 35      | 2    | R.IYKIPDGKPENQFAFSGECKNK.K <a href="#">13840</a> <a href="#">13852</a>   |
| <a href="#">13863</a> | 858.8412  | 2573.5017 | 2572.2479 | 1.2538  | 1    | 33    | 0.064   | 1    | K.AKGDNDPLDVCEIGELVGYPGQVK.Q <a href="#">13873</a>                       |
| <a href="#">15123</a> | 950.8869  | 2849.6387 | 2849.3085 | 0.3302  | 0    | 35    | 0.034   | 1    | K.GYLWNYGAFPQTWEDPNTVHPETK.A                                             |
| <a href="#">16296</a> | 1141.4909 | 3421.4507 | 3420.7024 | 0.7483  | 0    | 53    | 0.0004  | 1    | K.DGQPVSPFHDIPLYANEEQTILNMVVEIPR.W <a href="#">16303</a>                 |
| <a href="#">16329</a> | 1147.1345 | 3438.3817 | 3436.6973 | 1.6844  | 0    | (31)  | 0.078   | 1    | K.DGQPVSPFHDIPLYANEEQTILNMVVEIPR.W <a href="#">16328</a>                 |

54. [gi|220697495|gb|EED53836.1](#) Mass: 200523 Score: 423 Queries matched: 36 emPAI: 0.08  
clathrin heavy chain [Aspergillus flavus NRRL3357]

| Query                 | Observed         | Mr(expt)         | Mr(calc)         | Delta          | Miss     | Score      | Expect         | Rank     | Peptide                                                                                          |
|-----------------------|------------------|------------------|------------------|----------------|----------|------------|----------------|----------|--------------------------------------------------------------------------------------------------|
| <a href="#">200</a>   | 783.1270         | 782.1197         | 780.4316         | 1.6881         | 1        | 7          | 25             | 4        | K.YLKMAR.K                                                                                       |
| <a href="#">224</a>   | 791.2860         | 790.2787         | 789.3617         | 0.9171         | 1        | 12         | 14             | 3        | K.KDNEER.K                                                                                       |
| <a href="#">298</a>   | 416.3841         | 830.7537         | 829.4294         | 1.3244         | 0        | 11         | 16             | 10       | R.TPETINR.F                                                                                      |
| <a href="#">2049</a>  | 614.8001         | 1227.5857        | 1226.6911        | 0.8947         | 1        | 5          | 53             | 9        | R.KYDVVYLVTK.Y                                                                                   |
| <a href="#">3246</a>  | 682.2206         | 1362.4267        | 1360.7714        | 1.6553         | 1        | 7          | 34             | 8        | R.TIQIFDLGAKQK.L                                                                                 |
| <a href="#">3607</a>  | 701.1296         | 1400.2447        | 1400.6130        | -0.3682        | 0        | 8          | 26             | 5        | K.ENDMYD <del>TL</del> TVGK.Y <a href="#">3610</a>                                               |
| <a href="#">3863</a>  | 717.2616         | 1432.5087        | 1430.7015        | 1.8073         | 0        | 4          | 72             | 5        | K.DNKPEHGHLQTR.L                                                                                 |
| <a href="#">4263</a>  | <b>739.3116</b>  | <b>1476.6087</b> | <b>1476.7460</b> | <b>-0.1373</b> | <b>0</b> | <b>61</b>  | <b>0.00011</b> | <b>1</b> | <b>R.LDQLSELEDFLR.S <a href="#">4264</a></b>                                                     |
| <a href="#">6184</a>  | 828.9726         | 1655.9307        | 1654.8249        | 1.1058         | 0        | 1          | 1.3e+02        | 2        | K.RPINADSAIMHWTK.N                                                                               |
| <a href="#">7050</a>  | <b>862.3331</b>  | <b>1722.6517</b> | <b>1721.9240</b> | <b>0.7277</b>  | <b>0</b> | <b>84</b>  | <b>5.6e-07</b> | <b>1</b> | <b>K.FSDLLGPGSLISLFEK.Y <a href="#">7042</a> <a href="#">7075</a></b>                            |
| <a href="#">8398</a>  | 928.7606         | 1855.5067        | 1855.8927        | -0.3860        | 1        | 0          | 1.3e+02        | 4        | R.TDKLSPEWLMNYFGR.L                                                                              |
| <a href="#">8811</a>  | <b>950.8856</b>  | <b>1899.7567</b> | <b>1899.0240</b> | <b>0.7327</b>  | <b>0</b> | <b>101</b> | <b>1.1e-08</b> | <b>1</b> | <b>K.AFLEADLPGELIELLEK.I <a href="#">8809</a></b>                                                |
| <a href="#">9105</a>  | 645.3472         | 1933.0197        | 1930.9359        | 2.0838         | 2        | 1          | 1e+02          | 5        | K.YCEKRDPNLAYIAYR.K                                                                              |
| <a href="#">9340</a>  | <b>982.6856</b>  | <b>1963.3567</b> | <b>1962.9422</b> | <b>0.4146</b>  | <b>0</b> | <b>70</b>  | <b>1.4e-05</b> | <b>1</b> | <b>R.AVNDAINDLLIEEEDYK.T <a href="#">9344</a></b>                                                |
| <a href="#">9828</a>  | 675.6982         | 2024.0727        | 2021.1520        | 2.9207         | 1        | 8          | 22             | 2        | R.QKLNEEDKPVIIINLK.N                                                                             |
| <a href="#">10191</a> | <b>687.2462</b>  | <b>2058.7167</b> | <b>2057.0694</b> | <b>1.6473</b>  | <b>0</b> | <b>10</b>  | <b>14</b>      | <b>1</b> | <b>K.QVGYQPDY<del>TQ</del>LLOHIVR.V</b>                                                          |
| <a href="#">10788</a> | 714.0179         | 2139.0317        | 2136.9456        | 2.0861         | 2        | 2          | 76             | 10       | K.ENDMYD <del>TL</del> TVGKYCEKR.D                                                               |
| <a href="#">11034</a> | <b>724.6455</b>  | <b>2170.9147</b> | <b>2169.2633</b> | <b>1.6514</b>  | <b>2</b> | <b>8</b>   | <b>20</b>      | <b>1</b> | <b>K.NIIALKAQGR<del>TIQIFDLGAK.Q</del></b>                                                       |
| <a href="#">11368</a> | 739.2665         | 2214.7777        | 2212.0616        | 2.7161         | 1        | 3          | 70             | 5        | K.YIEAATAMGQVTEVERICR.E                                                                          |
| <a href="#">11745</a> | 759.5129         | 2275.5167        | 2273.1085        | 2.4082         | 1        | 1          | 94             | 5        | R.AHMGMFTELGIALSKYHPDR.V                                                                         |
| <a href="#">12201</a> | <b>779.5879</b>  | <b>2335.7417</b> | <b>2333.1750</b> | <b>2.5667</b>  | <b>1</b> | <b>8</b>   | <b>18</b>      | <b>1</b> | <b>R.AVNDAINDLLIEEEDYKTLR.D</b>                                                                  |
| <a href="#">13318</a> | <b>1249.3991</b> | <b>2496.7837</b> | <b>2495.2155</b> | <b>1.5682</b>  | <b>0</b> | <b>57</b>  | <b>0.00021</b> | <b>1</b> | <b>K.AVEVYFPQEAVNDFP<del>VAMQVSR.K</del></b>                                                     |
| <a href="#">13457</a> | 838.8082         | 2513.4027        | 2513.2294        | 0.1733         | 0        | 4          | 43             | 2        | K.NAPQTGQQMSVILQYFGMLLDK.G                                                                       |
| <a href="#">13644</a> | 846.6769         | 2537.0087        | 2537.3159        | -0.3072        | 1        | 3          | 61             | 2        | R.VNPSRAPAVVGLLD <del>VDC</del> EESI <del>IK.N</del> <a href="#">13640</a> <a href="#">13650</a> |
| <a href="#">14083</a> | <b>873.4392</b>  | <b>2617.2957</b> | <b>2615.3364</b> | <b>1.9593</b>  | <b>1</b> | <b>3</b>   | <b>62</b>      | <b>1</b> | <b>R.SMVDQVIATAVPESTEPDKVSVAVK.A</b>                                                             |
| <a href="#">14563</a> | <b>901.4112</b>  | <b>2701.2117</b> | <b>2701.3082</b> | <b>-0.0965</b> | <b>1</b> | <b>2</b>   | <b>73</b>      | <b>1</b> | <b>R.ASDPSNYLEV<del>ETATHAGKDE</del>DLVK.Y</b>                                                   |
| <a href="#">14599</a> | <b>902.8915</b>  | <b>2705.6527</b> | <b>2703.4754</b> | <b>2.1773</b>  | <b>2</b> | <b>7</b>   | <b>22</b>      | <b>1</b> | <b>K.RPINADSAIMHWTK<del>NIIALKAQGR.T</del></b>                                                   |
| <a href="#">14816</a> | 920.7859         | 2759.3357        | 2756.3616        | 2.9741         | 1        | 2          | 72             | 4        | R.VNPEKGAEEFAAQLANEESGALIDLDR.V                                                                  |

55. [gi|220698204|gb|EED54544.1](#) Mass: 30946 Score: 417 Queries matched: 17 emPAI: 1.04  
prohibitin complex subunit Phb1, putative [Aspergillus flavus NRRL3357]

| Query                | Observed        | Mr(expt)         | Mr(calc)         | Delta         | Miss     | Score     | Expect        | Rank     | Peptide                                     |
|----------------------|-----------------|------------------|------------------|---------------|----------|-----------|---------------|----------|---------------------------------------------|
| <a href="#">526</a>  | 454.6286        | 907.2427         | 907.4611         | -0.2184       | 0        | 6         | 44            | 8        | R.NISTTTGSK.D                               |
| <a href="#">1744</a> | <b>585.2721</b> | <b>1168.5297</b> | <b>1167.6863</b> | <b>0.8434</b> | <b>0</b> | <b>44</b> | <b>0.0055</b> | <b>1</b> | <b>R.VLPSIGNEVLK.A <a href="#">1742</a></b> |
| <a href="#">1863</a> | 597.3511        | 1192.6877        | 1190.6329        | 2.0548        | 0        | 6         | 38            | 2        | K.DLQMVSLTLR.V                              |



|                       |           |           |           |        |   |    |         |    |                                                                                            |
|-----------------------|-----------|-----------|-----------|--------|---|----|---------|----|--------------------------------------------------------------------------------------------|
| <a href="#">2836</a>  | 660.7131  | 1319.4117 | 1318.6252 | 0.7865 | 0 | 72 | 1.1e-05 | 1  | R.AEGEAESADIISK.A <a href="#">2826</a>                                                     |
| <a href="#">7652</a>  | 891.2631  | 1780.5117 | 1779.9672 | 0.5445 | 0 | 64 | 5.8e-05 | 1  | K.VVNEGTHFLIPWLQK.A <a href="#">7653</a> <a href="#">7664</a> <a href="#">7667</a>         |
| <a href="#">7778</a>  | 896.2476  | 1790.4807 | 1789.8159 | 0.6649 | 0 | 74 | 5.4e-06 | 1  | K.LPAIQSYGTDYDER.V                                                                         |
| <a href="#">10863</a> | 1074.3881 | 2146.7617 | 2146.1786 | 0.5831 | 0 | 99 | 1.5e-08 | 1  | R.LALPVATGALIFNNSIYDVR.G <a href="#">10864</a> <a href="#">10865</a> <a href="#">10868</a> |
| <a href="#">12387</a> | 790.9122  | 2369.7147 | 2369.2550 | 0.4597 | 2 | 0  | 1.1e+02 | 4  | R.QANVIRAEGEAESADIISKAVAK.A                                                                |
| <a href="#">15325</a> | 981.3105  | 2940.9097 | 2939.4916 | 1.4181 | 1 | 2  |         | 61 | 1 K.LPAIQSYGTDYDERVLPSIGNEVLK.A                                                            |

56. [gi|220696972|gb|EED53313.1|](#) Mass: 36717 Score: 414 Queries matched: 20 emPAI: 0.68

aldehyde reductase (AKR1), putative [Aspergillus flavus NRRL3357]

| Query                 | Observed  | Mr(expt)  | Mr(calc)  | Delta   | Miss | Score | Expect  | Rank | Peptide                                                                                    |
|-----------------------|-----------|-----------|-----------|---------|------|-------|---------|------|--------------------------------------------------------------------------------------------|
| <a href="#">52</a>    | 679.9980  | 678.9907  | 678.3734  | 0.6173  | 1    | 7     | 29      | 10   | -.MSLGKK.V <a href="#">51</a>                                                              |
| <a href="#">875</a>   | 499.6701  | 997.3257  | 996.4916  | 0.8341  | 0    | 20    | 1.3     | 1    | R.AFEEFNK.R <a href="#">868</a>                                                            |
| <a href="#">2850</a>  | 661.7991  | 1321.5837 | 1319.6986 | 1.8851  | 0    | 10    | 14      | 2    | R.YNVPYVANKPR.W <a href="#">2853</a>                                                       |
| <a href="#">3956</a>  | 722.6081  | 1443.2017 | 1442.7518 | 0.4500  | 0    | 59    | 0.0002  | 1    | R.HLDLATIYQNK.E <a href="#">3964</a>                                                       |
| <a href="#">4239</a>  | 492.6635  | 1474.9687 | 1475.7997 | -0.8310 | 1    | 14    | 7.2     | 1    | R.RYNVPYVANKPR.W                                                                           |
| <a href="#">8973</a>  | 958.7871  | 1915.5597 | 1914.9938 | 0.5659  | 0    | 85    | 4.5e-07 | 1    | R.IAANFQEIELTPEEIAK.V <a href="#">8970</a>                                                 |
| <a href="#">9270</a>  | 652.2309  | 1953.6707 | 1951.9064 | 1.7643  | 0    | 32    | 0.08    | 1    | R.WNINVFGEPEEAPADHK.V <a href="#">9254</a>                                                 |
| <a href="#">11953</a> | 1151.9191 | 2301.8237 | 2301.2481 | 0.5756  | 0    | 76    | 3.3e-06 | 1    | K.EVSPAQVILAWSQVGGHSPK.S <a href="#">11945</a> <a href="#">11961</a> <a href="#">11964</a> |
| <a href="#">15712</a> | 1033.4092 | 3097.2057 | 3095.4773 | 1.7285  | 0    | 61    | 6.7e-05 | 1    | K.ALDDCLAECGLDYLGLVHWPVAFK.T <a href="#">15713</a>                                         |
| <a href="#">16399</a> | 1162.8329 | 3485.4767 | 3483.6392 | 1.8375  | 0    | 15    | 3.1     | 1    | K.TGNEYFPLVEGSTVPGGDCIIDDSSISIVDTWK.A                                                      |

57. [gi|220689909|gb|EED46259.1|](#) Mass: 52664 Score: 413 Queries matched: 24 emPAI: 0.44

conserved hypothetical protein [Aspergillus flavus NRRL3357]

| Query                 | Observed  | Mr(expt)  | Mr(calc)  | Delta   | Miss | Score | Expect  | Rank | Peptide                                                                                                 |
|-----------------------|-----------|-----------|-----------|---------|------|-------|---------|------|---------------------------------------------------------------------------------------------------------|
| <a href="#">1227</a>  | 359.0512  | 1074.1317 | 1074.6107 | -0.4789 | 1    | 10    | 17      | 4    | K.IEAMNKLK.D                                                                                            |
| <a href="#">1324</a>  | 547.1116  | 1092.2087 | 1091.5645 | 0.6442  | 0    | 43    | 0.0085  | 1    | K.TLQANVTSMK.S                                                                                          |
| <a href="#">1412</a>  | 555.2746  | 1108.5347 | 1107.5594 | 0.9753  | 0    | (21)  | 1.3     | 2    | K.TLQANVTSMK.S <a href="#">1399</a> <a href="#">1414</a>                                                |
| <a href="#">2100</a>  | 618.8951  | 1235.7757 | 1233.6816 | 2.0941  | 0    | 5     | 49      | 9    | K.TGIVDTSLLTSK.I <a href="#">2099</a>                                                                   |
| <a href="#">3202</a>  | 680.4231  | 1358.8317 | 1357.7215 | 1.1103  | 2    | 4     | 72      | 4    | K.RWKANPTASATR.T                                                                                        |
| <a href="#">3566</a>  | 698.7346  | 1395.4547 | 1394.7783 | 0.6765  | 1    | 6     | 34      | 5    | R.YLHGGRVLPDR.T                                                                                         |
| <a href="#">4413</a>  | 748.7441  | 1495.4737 | 1493.7912 | 1.6826  | 2    | 5     | 47      | 8    | K.FEEKIPRLSMK.R                                                                                         |
| <a href="#">5427</a>  | 533.7339  | 1598.1797 | 1597.8610 | 0.3187  | 1    | 4     | 65      | 8    | K.QLHKTLQANVTSMK.S                                                                                      |
| <a href="#">7602</a>  | 889.2576  | 1776.5007 | 1774.9829 | 1.5178  | 1    | 30    | 0.15    | 1    | K.TGIVDTSLLTSKIWNK.V <a href="#">7604</a>                                                               |
| <a href="#">7736</a>  | 894.1446  | 1786.2747 | 1785.8996 | 0.3751  | 0    | 129   | 2e-11   | 1    | R.QDILDLTDDLGLDVK.I <a href="#">7743</a> <a href="#">7752</a> <a href="#">7753</a> <a href="#">7757</a> |
| <a href="#">9814</a>  | 675.2009  | 2022.5807 | 2021.9827 | 0.5980  | 0    | 4     | 52      | 9    | K.SMTTILDQELGSIQDLK.E <a href="#">9805</a>                                                              |
| <a href="#">10142</a> | 1028.2871 | 2054.5597 | 2053.9626 | 0.5971  | 0    | 83    | 6.9e-07 | 1    | K.LFEASCQTNQSTLEGLEK.S                                                                                  |
| <a href="#">16030</a> | 1095.1442 | 3282.4107 | 3280.7417 | 1.6690  | 0    | 68    | 1.7e-05 | 1    | K.YVMSYIQNAQLVVPVQVLSLEDYLQQLK.D                                                                        |
| <a href="#">16094</a> | 1100.6199 | 3298.8377 | 3296.7366 | 2.1011  | 0    | (53)  | 0.00051 | 1    | K.YVMSYIQNAQLVVPVQVLSLEDYLQQLK.D <a href="#">16095</a>                                                  |

58. [gi|220699794|gb|EED56133.1|](#) Mass: 86057 Score: 407 Queries matched: 50 emPAI: 0.51

mitochondrial aconitate hydratase, putative [Aspergillus flavus NRRL3357]

| Query                 | Observed  | Mr(expt)  | Mr(calc)  | Delta   | Miss | Score | Expect  | Rank | Peptide                                                                      |
|-----------------------|-----------|-----------|-----------|---------|------|-------|---------|------|------------------------------------------------------------------------------|
| <a href="#">36</a>    | 666.5970  | 665.5897  | 665.3748  | 0.2149  | 0    | 4     | 58      | 4    | R.GVSYLK.L                                                                   |
| <a href="#">100</a>   | 716.5640  | 715.5567  | 714.3548  | 1.2019  | 0    | 7     | 48      | 8    | K.IQPDDK.V                                                                   |
| <a href="#">582</a>   | 460.1971  | 918.3797  | 918.5399  | -0.1602 | 1    | 11    | 16      | 10   | K.SRLFLGAR.G                                                                 |
| <a href="#">713</a>   | 483.7011  | 965.3877  | 962.5331  | 2.8546  | 1    | 21    | 1.2     | 1    | - .MISTR <del>L</del> AR.M <a href="#">716</a>                               |
| <a href="#">1090</a>  | 525.1766  | 1048.3387 | 1047.5601 | 0.7787  | 0    | 29    | 0.26    | 1    | K.FNPLTDTLK.D <a href="#">1087</a> <a href="#">1091</a> <a href="#">1092</a> |
| <a href="#">1352</a>  | 549.8151  | 1097.6157 | 1096.6492 | 0.9665  | 0    | 51    | 0.0012  | 1    | K.DATNIPILIK.C                                                               |
| <a href="#">1401</a>  | 554.7086  | 1107.4027 | 1105.5437 | 1.8590  | 0    | 25    | 0.49    | 1    | K.MSENLEIVR.K <a href="#">1400</a>                                           |
| <a href="#">1706</a>  | 581.1756  | 1160.3367 | 1159.5622 | 0.7745  | 0    | 9     | 24      | 6    | R.NTYQAPPVDR.S                                                               |
| <a href="#">1931</a>  | 604.6346  | 1207.2547 | 1206.6972 | 0.5575  | 0    | 29    | 0.22    | 1    | K.LKPPTGEGLPK.G                                                              |
| <a href="#">2565</a>  | 645.7146  | 1289.4147 | 1288.6663 | 0.7484  | 0    | 66    | 4.6e-05 | 1    | K.LTGELSGWTPK.D                                                              |
| <a href="#">2950</a>  | 667.2506  | 1332.4867 | 1331.6681 | 0.8186  | 0    | 44    | 0.0067  | 1    | R.STVNVAVSPTSDR.L                                                            |
| <a href="#">3446</a>  | 692.2921  | 1382.5697 | 1381.8908 | 0.6789  | 1    | 2     | 89      | 8    | K.DIILKVAGLLTVK.G <a href="#">3441</a>                                       |
| <a href="#">3654</a>  | 704.5991  | 1407.1837 | 1406.6572 | 0.5265  | 2    | 1     | 1.2e+02 | 10   | K.DGSALNTMARKGGN.-                                                           |
| <a href="#">4019</a>  | 725.2566  | 1448.4987 | 1447.7671 | 0.7316  | 0    | 42    | 0.0095  | 1    | K.SLFTITPGSEQIR.A <a href="#">4004</a> <a href="#">4028</a>                  |
| <a href="#">4364</a>  | 745.6646  | 1489.3147 | 1488.7725 | 0.5422  | 0    | 77    | 3.3e-06 | 1    | R.LQVLQGFQAWDGK.D <a href="#">4361</a>                                       |
| <a href="#">5151</a>  | 525.0745  | 1572.2017 | 1569.8548 | 2.3469  | 1    | 10    | 16      | 3    | K.DATNIPILIKCQK.T <a href="#">5113</a>                                       |
| <a href="#">5252</a>  | 792.0556  | 1582.0967 | 1581.7423 | 0.3544  | 0    | 68    | 2.3e-05 | 1    | K.NAFTGEYDAVPATAR.D <a href="#">5254</a>                                     |
| <a href="#">5375</a>  | 797.1886  | 1592.3627 | 1590.8253 | 1.5374  | 2    | 1     | 1.1e+02 | 7    | K.FNPLTDTLKDGDGK.E                                                           |
| <a href="#">5852</a>  | 816.1901  | 1630.3657 | 1630.9011 | -0.5353 | 2    | 6     | 40      | 4    | - .MISTR <del>L</del> ARMGALAPK.S <a href="#">5845</a>                       |
| <a href="#">5862</a>  | 544.7409  | 1631.2007 | 1630.9011 | 0.2997  | 2    | (4)   | 57      | 9    | - .MISTR <del>L</del> ARMGALAPK.S                                            |
| <a href="#">6269</a>  | 555.0185  | 1662.0337 | 1662.8941 | -0.8603 | 1    | 8     | 22      | 9    | K.SKSLFTITPGSEQIR.A                                                          |
| <a href="#">7981</a>  | 906.7686  | 1811.5227 | 1810.8447 | 0.6780  | 0    | 13    | 6.5     | 1    | K.QGMLPLTFAEPADYDK.I <a href="#">7976</a>                                    |
| <a href="#">8560</a>  | 625.5962  | 1873.7667 | 1871.0404 | 2.7263  | 1    | 3     | 69      | 10   | K.LTGELSGWTPKDIILK.V <a href="#">8548</a>                                    |
| <a href="#">9468</a>  | 990.5981  | 1979.1817 | 1977.9544 | 1.2273  | 0    | 85    | 4.4e-07 | 1    | K.ILYSHLDNPHEQDIER.G <a href="#">9457</a> <a href="#">9464</a>               |
| <a href="#">9505</a>  | 662.5422  | 1984.6047 | 1982.9949 | 1.6099  | 1    | 10    | 12      | 2    | R.ANEINKEVYDFLASATAK.Y <a href="#">9494</a> <a href="#">9511</a>             |
| <a href="#">12267</a> | 1174.6016 | 2347.1887 | 2346.3284 | 0.8603  | 2    | 0     | 1.2e+02 | 8    | R.HLGLLAIITRSFARIHETNLK.K <a href="#">12268</a>                              |
| <a href="#">12301</a> | 1176.8506 | 2351.6867 | 2349.1358 | 2.5509  | 2    | 2     | 85      | 1    | K.CQGKTTT <del>D</del> HISMAGPWLKYR.G                                        |
| <a href="#">14680</a> | 908.2652  | 2721.7737 | 2721.3504 | 0.4234  | 1    | 1     | 79      | 8    | R.GHLDNISNMLIGAVNAENGEANKV.K.N                                               |
| <a href="#">15077</a> | 944.3645  | 2830.0717 | 2829.3463 | 0.7254  | 1    | 4     | 45      | 6    | K.YRGHLDNISNMLIGAVNAENGEANK.V                                                |
| <a href="#">15763</a> | 1041.5439 | 3121.6097 | 3119.4441 | 2.1656  | 0    | 55    | 0.00032 | 1    | R.DGQLQTLEEYGGVILANACGPCIGQWDR.K <a href="#">15755</a>                       |

59. [gi|220696919|gb|EED53260.1|](#) Mass: 52846 Score: 406 Queries matched: 33 emPAI: 0.72

ATP citrate lyase subunit (Acl), putatibe [Aspergillus flavus NRRL3357]

| Query                | Observed | Mr(expt)  | Mr(calc)  | Delta   | Miss | Score | Expect | Rank | Peptide        |
|----------------------|----------|-----------|-----------|---------|------|-------|--------|------|----------------|
| <a href="#">237</a>  | 803.0890 | 802.0817  | 802.3973  | -0.3156 | 0    | 18    | 3.8    | 1    | R.EWIEAR.A     |
| <a href="#">1381</a> | 553.0001 | 1103.9857 | 1103.5359 | 0.4498  | 0    | 56    | 0.0004 | 1    | R.AGPNYQEGLR.N |
| <a href="#">1586</a> | 568.5911 | 1135.1677 | 1134.6033 | 0.5644  | 0    | 26    | 0.38   | 1    | R.EVAPVLNEHK.V |

|                       |           |           |           |         |   |    |         |   |                                                                                        |
|-----------------------|-----------|-----------|-----------|---------|---|----|---------|---|----------------------------------------------------------------------------------------|
| <a href="#">1691</a>  | 579.9471  | 1157.8797 | 1157.6808 | 0.1989  | 0 | 37 | 0.039   | 1 | K.FVAKPDQLIK.R <a href="#">1689</a>                                                    |
| <a href="#">1938</a>  | 605.2431  | 1208.4717 | 1209.6030 | -1.1312 | 0 | 5  | 48      | 2 | R.LASLYFPEDR.A <a href="#">1939</a>                                                    |
| <a href="#">2307</a>  | 631.7026  | 1261.3907 | 1259.6371 | 1.7537  | 1 | 6  | 41      | 6 | R.RAGPNYQEGLR.N <a href="#">2313</a>                                                   |
| <a href="#">2804</a>  | 659.2966  | 1316.5787 | 1314.7144 | 1.8644  | 0 | 22 | 1.1     | 1 | K.DVQVETVTGVL.R <a href="#">2788</a>                                                   |
| <a href="#">3034</a>  | 671.7101  | 1341.4057 | 1340.8027 | 0.6030  | 1 | 8  | 24      | 3 | K.TGASLKLTVLNPK.G <a href="#">3024</a> <a href="#">3035</a>                            |
| <a href="#">4051</a>  | 727.1606  | 1452.3067 | 1450.7780 | 1.5288  | 0 | 70 | 1.5e-05 | 1 | R.SPANLGIAVAPQEGK.V                                                                    |
| <a href="#">5058</a>  | 782.0786  | 1562.1427 | 1561.7987 | 0.3440  | 0 | 25 | 0.57    | 1 | K.NYPSNEEIAATLLK.K                                                                     |
| <a href="#">5669</a>  | 808.8391  | 1615.6637 | 1614.8590 | 0.8047  | 2 | 8  | 25      | 1 | R.RAGPNYQEGLRNIK.S                                                                     |
| <a href="#">5951</a>  | 547.4375  | 1639.2907 | 1637.8890 | 1.4018  | 0 | 43 | 0.0067  | 1 | K.VPSGVHNVLVDFISR.L <a href="#">5939</a> <a href="#">5948</a> <a href="#">5961</a>     |
| <a href="#">8013</a>  | 908.1831  | 1814.3517 | 1813.8821 | 0.4696  | 0 | 83 | 7.1e-07 | 1 | K.VNIDAGPPMEFPAPFGR.E <a href="#">8019</a> <a href="#">8037</a> <a href="#">8040</a>   |
| <a href="#">9283</a>  | 978.8296  | 1955.6447 | 1955.0517 | 0.5931  | 0 | 27 | 0.25    | 1 | K.VLFIGGGIANFTNVASTFK.G <a href="#">9278</a> <a href="#">9287</a> <a href="#">9289</a> |
| <a href="#">10332</a> | 1039.2891 | 2076.5637 | 2075.0575 | 1.5062  | 0 | 97 | 2.4e-08 | 1 | K.DVLDQAEVTYPWLLASGAK.F <a href="#">10331</a>                                          |
| <a href="#">10351</a> | 693.6289  | 2077.8647 | 2076.1480 | 1.7167  | 0 | 34 | 0.05    | 1 | R.APVIKPTPLPPSSTHNPPAR.L                                                               |
| <a href="#">16079</a> | 1098.0149 | 3291.0227 | 3289.7203 | 1.3024  | 1 | 1  | 68      | 3 | K.SVGEELGLNMHVYGPMEHVSGIVPLALLGKK.S                                                    |

60. [gi|220699585|gb|EED55924.1|](#) Mass: 22761 Score: 406 Queries matched: 22 emPAI: 2.00

40S ribosomal protein S7e [Aspergillus flavus NRRL3357]

| Query                 | Observed  | Mr(expt)  | Mr(calc)  | Delta   | Miss | Score | Expect  | Rank | Peptide                                                                                         |
|-----------------------|-----------|-----------|-----------|---------|------|-------|---------|------|-------------------------------------------------------------------------------------------------|
| <a href="#">380</a>   | 430.0966  | 858.1787  | 856.4766  | 1.7021  | 0    | 22    | 1.3     | 2    | K.IALNSPSR.Q                                                                                    |
| <a href="#">739</a>   | 485.6396  | 969.2647  | 968.5556  | 0.7091  | 0    | 28    | 0.25    | 1    | R.HVLFVAQR.R                                                                                    |
| <a href="#">795</a>   | 491.3631  | 980.7117  | 981.5243  | -0.8126 | 1    | 5     | 40      | 9    | R.EVEVGHGKK.A                                                                                   |
| <a href="#">1284</a>  | 543.6421  | 1085.2697 | 1084.5189 | 0.7508  | 0    | 44    | 0.0067  | 1    | R.LDAYGEVYR.R                                                                                   |
| <a href="#">3197</a>  | 680.3151  | 1358.6157 | 1357.7830 | 0.8327  | 0    | 29    | 0.22    | 1    | K.ATLRPLQFVSAR.E <a href="#">3195</a>                                                           |
| <a href="#">5164</a>  | 787.5086  | 1573.0027 | 1573.8563 | -0.8536 | 2    | 1     | 1.3e+02 | 10   | K.EDGSKTLKVILDEK.E                                                                              |
| <a href="#">5171</a>  | 787.6491  | 1573.2837 | 1572.7097 | 0.5741  | 0    | 54    | 0.00061 | 1    | R.NVVFEFPQSSASDF.- <a href="#">5160</a>                                                         |
| <a href="#">7628</a>  | 890.3791  | 1778.7437 | 1777.0655 | 1.6783  | 0    | 35    | 0.053   | 1    | K.AVIIFVPVPLLQGFHK.I <a href="#">7615</a> <a href="#">7630</a> <a href="#">7635</a>             |
| <a href="#">10933</a> | 1079.2656 | 2156.5167 | 2156.0651 | 0.4516  | 2    | 3     | 70      | 1    | R.RLTGRNVVFEFPQSSASDF.-                                                                         |
| <a href="#">12117</a> | 1162.4141 | 2322.8137 | 2322.2835 | 0.5302  | 0    | 80    | 1.4e-06 | 1    | R.TLTAVHDAILGDLVYPVEIVGK.R <a href="#">12116</a> <a href="#">12120</a> <a href="#">12121</a>    |
| <a href="#">14640</a> | 906.6055  | 2716.7947 | 2716.3191 | 0.4756  | 0    | 87    | 2.3e-07 | 1    | R.QNPSELENAIAGALFDLESNTQDLK.A <a href="#">14641</a> <a href="#">14655</a> <a href="#">14665</a> |

61. [gi|220697966|gb|EED54306.1|](#) Mass: 28784 Score: 403 Queries matched: 21 emPAI: 0.55

sorbitol/xylulose reductase Soul-like, putative [Aspergillus flavus NRRL3357]

| Query                 | Observed  | Mr(expt)  | Mr(calc)  | Delta   | Miss | Score | Expect  | Rank | Peptide                                                                                                                                                                  |
|-----------------------|-----------|-----------|-----------|---------|------|-------|---------|------|--------------------------------------------------------------------------------------------------------------------------------------------------------------------------|
| <a href="#">1052</a>  | 522.3061  | 1042.5977 | 1040.5979 | 1.9999  | 0    | 10    | 19      | 2    | K.VVVVTGASGPR.G                                                                                                                                                          |
| <a href="#">2282</a>  | 630.6151  | 1259.2157 | 1256.6765 | 2.5393  | 2    | 1     | 1.5e+02 | 4    | K.KTYGVEAKAYK.C                                                                                                                                                          |
| <a href="#">5205</a>  | 527.1009  | 1578.2807 | 1578.8253 | -0.5446 | 2    | 4     | 61      | 7    | K.NAEELKKTGYVEAK.A <a href="#">5229</a>                                                                                                                                  |
| <a href="#">7454</a>  | 883.3276  | 1764.6407 | 1764.0033 | 0.6374  | 0    | 94    | 5.6e-08 | 1    | M.PIPVPSANSLTDLLSLK.G <a href="#">7423</a> <a href="#">7459</a> <a href="#">7461</a> <a href="#">7467</a> <a href="#">7469</a> <a href="#">7472</a> <a href="#">7473</a> |
| <a href="#">9852</a>  | 676.3089  | 2025.9047 | 2027.0946 | -1.1899 | 2    | 1     | 92      | 8    | K.GKVVVVTGASGPRGMGIEAAR.G                                                                                                                                                |
| <a href="#">10915</a> | 1078.3716 | 2154.7287 | 2154.0481 | 0.6806  | 0    | 91    | 1e-07   | 1    | R.VNSISPGYIDTGLSDFVDQK.I <a href="#">10914</a> <a href="#">10934</a>                                                                                                     |

|                       |           |           |           |        |   |    |         |   |                                                 |
|-----------------------|-----------|-----------|-----------|--------|---|----|---------|---|-------------------------------------------------|
| <a href="#">11384</a> | 1109.4721 | 2216.9297 | 2214.9562 | 1.9736 | 0 | 2  | 72      | 1 | K.GAYVYLCSDASSYMTGSDLR.I                        |
| <a href="#">11756</a> | 760.3719  | 2278.0937 | 2276.1801 | 1.9136 | 1 | 54 | 0.0005  | 1 | K.LVDDVIKDFGQIDAFIANAGR.T <a href="#">11747</a> |
| <a href="#">11918</a> | 767.0439  | 2298.1097 | 2296.0576 | 2.0521 | 0 | 1  | 1.1e+02 | 3 | R.GCAEMGANIALTYASRPQGGEK.N                      |
| <a href="#">16093</a> | 1100.5492 | 3298.6257 | 3296.4966 | 2.1291 | 0 | 2  | 60      | 3 | R.TADGGVLESTVEAWMEVVQTDLNGTYHCAK.A              |

62. [gi|220700969|gb|EED57307.1|](#) Mass: 32440 Score: 398 Queries matched: 26 emPAI: 0.63

ATP synthase gamma chain, mitochondrial precursor, putative [Aspergillus flavus NRRL3357]

| Query                 | Observed  | Mr(expt)  | Mr(calc)  | Delta   | Miss | Score | Expect  | Rank | Peptide                                                          |
|-----------------------|-----------|-----------|-----------|---------|------|-------|---------|------|------------------------------------------------------------------|
| <a href="#">659</a>   | 477.2296  | 952.4447  | 952.5130  | -0.0683 | 0    | 15    | 4.3     | 1    | K.FQILYNR.Q <a href="#">662</a>                                  |
| <a href="#">1006</a>  | 517.2441  | 1032.4737 | 1031.5863 | 0.8875  | 0    | 23    | 0.9     | 1    | K.TLLVVASSDK.G                                                   |
| <a href="#">1219</a>  | 1074.0120 | 1073.0047 | 1071.6651 | 1.3396  | 2    | 5     | 57      | 9    | R.LKSIKNIK.E.I                                                   |
| <a href="#">1826</a>  | 593.6431  | 1185.2717 | 1184.5972 | 0.6745  | 0    | 18    | 2.7     | 1    | K.GLCGGIHSGLSK.A                                                 |
| <a href="#">3052</a>  | 672.6726  | 1343.3307 | 1342.8045 | 0.5263  | 2    | 6     | 48      | 9    | K.VIASTRLTRAQK.A                                                 |
| <a href="#">3117</a>  | 676.3081  | 1350.6017 | 1349.7337 | 0.8681  | 1    | 2     | 98      | 6    | K.ITNTMKVIASTR.L                                                 |
| <a href="#">3372</a>  | 688.0986  | 1374.1827 | 1373.6463 | 0.5364  | 0    | 59    | 0.00025 | 1    | R.TYGQTSNTVFEK.A <a href="#">3387</a>                            |
| <a href="#">6080</a>  | 824.8071  | 1647.5997 | 1646.8450 | 0.7547  | 0    | 69    | 2e-05   | 1    | R.TNPNAIVLSFANVCK.D <a href="#">6085</a>                         |
| <a href="#">7312</a>  | 876.0036  | 1749.9927 | 1748.9308 | 1.0619  | 0    | 14    | 5.6     | 2    | R.ILQEHADADIVVLGEK.A                                             |
| <a href="#">8767</a>  | 632.6792  | 1895.0157 | 1892.8832 | 2.1325  | 2    | 9     | 16      | 3    | R.RNAMENASKNAGEMINK.F <a href="#">8766</a> <a href="#">8768</a>  |
| <a href="#">9059</a>  | 643.2752  | 1926.8037 | 1926.9911 | -0.1874 | 1    | 1     | 98      | 6    | R.TAPPNAANFATLREIEGR.L                                           |
| <a href="#">9223</a>  | 975.4551  | 1948.8957 | 1948.0629 | 0.8328  | 1    | 2     | 86      | 2    | R.ILQEHADADIVVLGEKAK.A                                           |
| <a href="#">9342</a>  | 982.7571  | 1963.4997 | 1962.9646 | 0.5351  | 0    | 99    | 1.9e-08 | 1    | K.SANISSFEIDDQALANLR.E <a href="#">9350</a> <a href="#">9353</a> |
| <a href="#">10215</a> | 688.0985  | 2061.2737 | 2062.9266 | -1.6529 | 1    | 33    | 0.063   | 1    | K.AMDESRTYGQTSNTVFEK.A <a href="#">10237</a>                     |
| <a href="#">10409</a> | 695.7082  | 2084.1027 | 2084.1127 | -0.0099 | 1    | 2     | 88      | 2    | R.AGSAVVTRTAPPNAANFATLR.E                                        |
| <a href="#">13972</a> | 866.8005  | 2597.3797 | 2596.1838 | 1.1959  | 0    | 23    | 0.59    | 1    | R.EYALANSLFWAMAEGHACEISAR.R                                      |
| <a href="#">14587</a> | 1352.9116 | 2703.8087 | 2702.3803 | 1.4284  | 0    | 69    | 1.5e-05 | 1    | K.DIPTFADAQAVADQIALLPADYASVK.I <a href="#">14578</a>             |

63. [gi|220701426|gb|EED57764.1|](#) Mass: 24023 Score: 396 Queries matched: 30 emPAI: 1.84

40S ribosomal protein S5, putative [Aspergillus flavus NRRL3357]

| Query                | Observed | Mr(expt)  | Mr(calc)  | Delta   | Miss | Score | Expect  | Rank | Peptide                                                                                             |
|----------------------|----------|-----------|-----------|---------|------|-------|---------|------|-----------------------------------------------------------------------------------------------------|
| <a href="#">808</a>  | 492.8936 | 983.7727  | 983.5400  | 0.2327  | 0    | 66    | 4e-05   | 1    | R.QAVDVSPLR.R <a href="#">809</a>                                                                   |
| <a href="#">1165</a> | 532.9896 | 1063.9647 | 1063.5219 | 0.4428  | 0    | 35    | 0.056   | 1    | K.EALAEMGTVK.L                                                                                      |
| <a href="#">1438</a> | 557.8341 | 1113.6537 | 1113.5964 | 0.0573  | 1    | 16    | 4.8     | 10   | R.KAQCPPIER.L                                                                                       |
| <a href="#">1591</a> | 568.7021 | 1135.3897 | 1135.5478 | -0.1581 | 0    | 7     | 32      | 4    | R.LTNSLMMNGR.N                                                                                      |
| <a href="#">1619</a> | 571.2691 | 1140.5237 | 1139.6411 | 0.8826  | 1    | 19    | 1.9     | 1    | R.RQAVDVSPLR.R                                                                                      |
| <a href="#">1880</a> | 599.3471 | 1196.6797 | 1195.5509 | 1.1288  | 0    | 30    | 0.15    | 2    | K.WSYEDVEIR.D                                                                                       |
| <a href="#">1942</a> | 605.6591 | 1209.3037 | 1209.6254 | -0.3217 | 0    | 55    | 0.00049 | 1    | R.NPVYLPHSAGR.Y <a href="#">1940</a> <a href="#">1943</a> <a href="#">1951</a>                      |
| <a href="#">2983</a> | 669.1056 | 1336.1967 | 1335.7034 | 0.4933  | 0    | 57    | 0.0003  | 1    | R.DISLTDYIQIR.N <a href="#">2980</a> <a href="#">2991</a> <a href="#">2996</a> <a href="#">3001</a> |
| <a href="#">3167</a> | 678.7171 | 1355.4197 | 1354.7932 | 0.6265  | 0    | 90    | 1.6e-07 | 1    | R.VNQSIALLTIGAR.E <a href="#">3164</a>                                                              |
| <a href="#">3740</a> | 710.1326 | 1418.2507 | 1416.7660 | 1.4848  | 2    | 14    | 6.1     | 3    | R.FRKAQCPIIER.L <a href="#">3739</a>                                                                |

|                       |                          |                           |                           |                         |                   |                    |                         |                   |                                                                                                                          |
|-----------------------|--------------------------|---------------------------|---------------------------|-------------------------|-------------------|--------------------|-------------------------|-------------------|--------------------------------------------------------------------------------------------------------------------------|
| <a href="#">4949</a>  | <a href="#">776.5551</a> | <a href="#">1551.0957</a> | <a href="#">1549.8174</a> | <a href="#">1.2783</a>  | <a href="#">1</a> | <a href="#">6</a>  | <a href="#">37</a>      | <a href="#">1</a> | <a href="#">K.EALAEMGTVKLFNK.W</a> <a href="#">4958</a> <a href="#">4963</a>                                             |
| <a href="#">5075</a>  | <a href="#">522.6589</a> | <a href="#">1564.9547</a> | <a href="#">1564.7450</a> | <a href="#">0.2098</a>  | <a href="#">1</a> | <a href="#">5</a>  | <a href="#">52</a>      | <a href="#">6</a> | <a href="#">R.LTNSLMMNGRNNK.K</a>                                                                                        |
| <a href="#">5866</a>  | <a href="#">816.7661</a> | <a href="#">1631.5177</a> | <a href="#">1630.8236</a> | <a href="#">0.6942</a>  | <a href="#">0</a> | <a href="#">81</a> | <a href="#">1.2e-06</a> | <a href="#">1</a> | <a href="#">K.SIAECLAEEELINAAK.G</a> <a href="#">5864</a> <a href="#">5873</a> <a href="#">5874</a> <a href="#">5884</a> |
| <a href="#">10543</a> | <a href="#">701.9829</a> | <a href="#">2102.9267</a> | <a href="#">2103.0387</a> | <a href="#">-0.1120</a> | <a href="#">1</a> | <a href="#">0</a>  | <a href="#">1.3e+02</a> | <a href="#">4</a> | <a href="#">K.AQCPIIERLTNSLMMNGR.N</a>                                                                                   |

64. [gi|220690795|gb|EED47144.1|](#) Mass: 35395 Score: 396 Queries matched: 37 emPAI: 1.45

G-protein complex beta subunit CpcB [Aspergillus flavus NRRL3357]

| Query                 | Observed                  | Mr(expt)                  | Mr(calc)                  | Delta                   | Miss              | Score              | Expect                  | Rank               | Peptide                                                                                                                         |
|-----------------------|---------------------------|---------------------------|---------------------------|-------------------------|-------------------|--------------------|-------------------------|--------------------|---------------------------------------------------------------------------------------------------------------------------------|
| <a href="#">118</a>   | <a href="#">724.4860</a>  | <a href="#">723.4787</a>  | <a href="#">723.3803</a>  | <a href="#">0.0984</a>  | <a href="#">0</a> | <a href="#">29</a> | <a href="#">0.15</a>    | <a href="#">1</a>  | <a href="#">K.FTITDK.G</a> <a href="#">117</a>                                                                                  |
| <a href="#">167</a>   | <a href="#">761.5280</a>  | <a href="#">760.5207</a>  | <a href="#">759.4239</a>  | <a href="#">1.0968</a>  | <a href="#">0</a> | <a href="#">24</a> | <a href="#">0.92</a>    | <a href="#">1</a>  | <a href="#">R.QIVSASR.D</a> <a href="#">165</a>                                                                                 |
| <a href="#">1209</a>  | <a href="#">536.4286</a>  | <a href="#">1070.8427</a> | <a href="#">1069.4716</a> | <a href="#">1.3711</a>  | <a href="#">0</a> | <a href="#">25</a> | <a href="#">0.53</a>    | <a href="#">1</a>  | <a href="#">R.DEQAYGYPK.R</a> <a href="#">1204</a> <a href="#">1210</a>                                                         |
| <a href="#">1401</a>  | <a href="#">554.7086</a>  | <a href="#">1107.4027</a> | <a href="#">1105.5226</a> | <a href="#">1.8801</a>  | <a href="#">0</a> | <a href="#">24</a> | <a href="#">0.64</a>    | <a href="#">2</a>  | <a href="#">K.LWNTLGDCCK.F</a> <a href="#">1400</a>                                                                             |
| <a href="#">1533</a>  | <a href="#">565.5306</a>  | <a href="#">1129.0467</a> | <a href="#">1128.6655</a> | <a href="#">0.3812</a>  | <a href="#">0</a> | <a href="#">56</a> | <a href="#">0.0005</a>  | <a href="#">1</a>  | <a href="#">K.TLIIWNLTR.D</a> <a href="#">1539</a>                                                                              |
| <a href="#">1983</a>  | <a href="#">608.8161</a>  | <a href="#">1215.6177</a> | <a href="#">1215.5455</a> | <a href="#">0.0722</a>  | <a href="#">0</a> | <a href="#">46</a> | <a href="#">0.0043</a>  | <a href="#">1</a>  | <a href="#">K.GHTDWVSCVR.F</a>                                                                                                  |
| <a href="#">2445</a>  | <a href="#">639.2221</a>  | <a href="#">1276.4297</a> | <a href="#">1275.6459</a> | <a href="#">0.7838</a>  | <a href="#">0</a> | <a href="#">57</a> | <a href="#">0.00035</a> | <a href="#">1</a>  | <a href="#">R.LWELATGETTR.T</a> <a href="#">2471</a>                                                                            |
| <a href="#">3245</a>  | <a href="#">682.1731</a>  | <a href="#">1362.3317</a> | <a href="#">1361.7078</a> | <a href="#">0.6239</a>  | <a href="#">0</a> | <a href="#">46</a> | <a href="#">0.0044</a>  | <a href="#">1</a>  | <a href="#">K.VDELKPEYIEK.G</a> <a href="#">3246</a> <a href="#">3250</a> <a href="#">3252</a>                                  |
| <a href="#">3357</a>  | <a href="#">687.2371</a>  | <a href="#">1372.4597</a> | <a href="#">1371.7874</a> | <a href="#">0.6723</a>  | <a href="#">1</a> | <a href="#">41</a> | <a href="#">0.014</a>   | <a href="#">1</a>  | <a href="#">R.DKTLIIWNLTR.D</a> <a href="#">3340</a> <a href="#">3348</a>                                                       |
| <a href="#">4530</a>  | <a href="#">756.2256</a>  | <a href="#">1510.4367</a> | <a href="#">1508.6817</a> | <a href="#">1.7550</a>  | <a href="#">0</a> | <a href="#">68</a> | <a href="#">2e-05</a>   | <a href="#">1</a>  | <a href="#">K.DGTTMLWDLNESK.H</a> <a href="#">4529</a> <a href="#">4539</a>                                                     |
| <a href="#">8396</a>  | <a href="#">928.7056</a>  | <a href="#">1855.3967</a> | <a href="#">1854.9265</a> | <a href="#">0.4703</a>  | <a href="#">0</a> | <a href="#">79</a> | <a href="#">1.9e-06</a> | <a href="#">1</a>  | <a href="#">R.FSPNPQNPVIVSAGWDK.L</a> <a href="#">8412</a>                                                                      |
| <a href="#">10273</a> | <a href="#">689.6869</a>  | <a href="#">2066.0387</a> | <a href="#">2064.9865</a> | <a href="#">1.0522</a>  | <a href="#">0</a> | <a href="#">18</a> |                         | <a href="#">2</a>  | <a href="#">R.TFVGHTNDVLSVSFSADNR.Q</a> <a href="#">10264</a> <a href="#">10276</a> <a href="#">10279</a> <a href="#">10280</a> |
| <a href="#">11736</a> | <a href="#">759.3282</a>  | <a href="#">2274.9627</a> | <a href="#">2275.1498</a> | <a href="#">-0.1871</a> | <a href="#">0</a> | <a href="#">3</a>  |                         | <a href="#">70</a> | <a href="#">K.HLYSLHAGDEIHALVFSNRY</a>                                                                                          |
| <a href="#">15330</a> | <a href="#">981.9802</a>  | <a href="#">2942.9187</a> | <a href="#">2940.4400</a> | <a href="#">2.4788</a>  | <a href="#">0</a> | <a href="#">43</a> | <a href="#">0.0051</a>  | <a href="#">1</a>  | <a href="#">R.GTLEGHNGWVTSLSLENPNMLLSGSR.D</a> <a href="#">15327</a> <a href="#">15329</a>                                      |
| <a href="#">15449</a> | <a href="#">998.6552</a>  | <a href="#">2992.9437</a> | <a href="#">2990.3716</a> | <a href="#">2.5721</a>  | <a href="#">0</a> | <a href="#">4</a>  |                         | <a href="#">48</a> | <a href="#">R.SLEGSHIVSDCVISSDGAYALSASWDK.S</a>                                                                                 |
| <a href="#">15574</a> | <a href="#">1018.6552</a> | <a href="#">3052.9437</a> | <a href="#">3052.4614</a> | <a href="#">0.4823</a>  | <a href="#">1</a> | <a href="#">3</a>  |                         | <a href="#">50</a> | <a href="#">K.GHTDWVSCVRFSPNPQNPVIVSAGWDK.L</a>                                                                                 |

65. [gi|220691640|gb|EED47988.1|](#) Mass: 17113 Score: 385 Queries matched: 28 emPAI: 2.54

nucleoside diphosphate kinase [Aspergillus flavus NRRL3357]

| Query                | Observed                 | Mr(expt)                  | Mr(calc)                  | Delta                  | Miss              | Score              | Expect                  | Rank              | Peptide                                                                                                                                                             |
|----------------------|--------------------------|---------------------------|---------------------------|------------------------|-------------------|--------------------|-------------------------|-------------------|---------------------------------------------------------------------------------------------------------------------------------------------------------------------|
| <a href="#">541</a>  | <a href="#">456.3911</a> | <a href="#">910.7677</a>  | <a href="#">910.5600</a>  | <a href="#">0.2077</a> | <a href="#">0</a> | <a href="#">43</a> | <a href="#">0.0068</a>  | <a href="#">1</a> | <a href="#">R.GLVGPIISR.F</a> <a href="#">538</a> <a href="#">539</a> <a href="#">543</a> <a href="#">553</a>                                                       |
| <a href="#">652</a>  | <a href="#">475.3541</a> | <a href="#">948.6937</a>  | <a href="#">948.4665</a>  | <a href="#">0.2272</a> | <a href="#">0</a> | <a href="#">67</a> | <a href="#">3.2e-05</a> | <a href="#">1</a> | <a href="#">R.GDFAIDVGR.N</a> <a href="#">650</a> <a href="#">651</a> <a href="#">654</a>                                                                           |
| <a href="#">3147</a> | <a href="#">677.6826</a> | <a href="#">1353.3507</a> | <a href="#">1351.6197</a> | <a href="#">1.7310</a> | <a href="#">0</a> | <a href="#">62</a> | <a href="#">9.8e-05</a> | <a href="#">1</a> | <a href="#">K.HSQFDWIYEK.A</a> <a href="#">3139</a> <a href="#">3157</a>                                                                                            |
| <a href="#">3773</a> | <a href="#">713.2901</a> | <a href="#">1424.5657</a> | <a href="#">1422.6568</a> | <a href="#">1.9089</a> | <a href="#">1</a> | <a href="#">45</a> | <a href="#">0.0049</a>  | <a href="#">1</a> | <a href="#">K.HSQFDWIYEKA.-</a> <a href="#">3755</a> <a href="#">3762</a>                                                                                           |
| <a href="#">5876</a> | <a href="#">817.2341</a> | <a href="#">1632.4537</a> | <a href="#">1629.8766</a> | <a href="#">2.5771</a> | <a href="#">0</a> | <a href="#">33</a> | <a href="#">0.081</a>   | <a href="#">1</a> | <a href="#">K.EIALWFKPEELQK.Y</a> <a href="#">5845</a> <a href="#">5852</a> <a href="#">5861</a> <a href="#">5862</a>                                               |
| <a href="#">6148</a> | <a href="#">827.3156</a> | <a href="#">1652.6167</a> | <a href="#">1651.9257</a> | <a href="#">0.6910</a> | <a href="#">0</a> | <a href="#">98</a> | <a href="#">2.2e-08</a> | <a href="#">1</a> | <a href="#">R.TILGATNPLASAPGTIR.G</a> <a href="#">6108</a> <a href="#">6115</a> <a href="#">6147</a> <a href="#">6150</a> <a href="#">6155</a> <a href="#">6160</a> |
| <a href="#">9239</a> | <a href="#">651.3292</a> | <a href="#">1950.9657</a> | <a href="#">1949.9517</a> | <a href="#">1.0140</a> | <a href="#">0</a> | <a href="#">1</a>  | <a href="#">1.2e+02</a> | <a href="#">6</a> | <a href="#">-.MSDEQTFIAIKPDGVQR.G</a>                                                                                                                               |

66. [gi|220701800|gb|EED58138.1|](#) Mass: 21932 Score: 383 Queries matched: 28 emPAI: 2.11

60S ribosomal protein L9, putative [Aspergillus flavus NRRL3357]

| Query | Observed | Mr(expt) | Mr(calc) | Delta | Miss | Score | Expect | Rank | Peptide |
|-------|----------|----------|----------|-------|------|-------|--------|------|---------|
|-------|----------|----------|----------|-------|------|-------|--------|------|---------|



|                       |          |           |           |         |   |     |         |   |                                                                                                                           |
|-----------------------|----------|-----------|-----------|---------|---|-----|---------|---|---------------------------------------------------------------------------------------------------------------------------|
| <a href="#">34</a>    | 660.3000 | 659.2927  | 659.3126  | -0.0199 | 0 | 25  | 0.77    | 1 | R.GNIVEE.-                                                                                                                |
| <a href="#">89</a>    | 707.5200 | 706.5127  | 706.3650  | 0.1477  | 0 | 27  | 0.35    | 4 | R.NFLGEK.Y                                                                                                                |
| <a href="#">364</a>   | 856.5590 | 855.5517  | 855.4814  | 0.0703  | 0 | 24  | 0.72    | 1 | R.VVTVEGPR.G <a href="#">359</a> <a href="#">360</a> <a href="#">361</a> <a href="#">365</a> <a href="#">368</a>          |
| <a href="#">531</a>   | 455.4256 | 908.8367  | 908.5331  | 0.3036  | 0 | 37  | 0.032   | 1 | R.LPIPENVK.I <a href="#">529</a>                                                                                          |
| <a href="#">2645</a>  | 649.9746 | 1297.9347 | 1297.7969 | 0.1378  | 0 | 96  | 4e-08   | 1 | R.TIINNLIIGVTK.G <a href="#">2643</a> <a href="#">2650</a> <a href="#">2652</a> <a href="#">2657</a> <a href="#">2664</a> |
| <a href="#">2871</a>  | 663.7471 | 1325.4797 | 1325.6979 | -0.2182 | 1 | 24  | 0.59    | 1 | R.KFLDGLYVSR.G                                                                                                            |
| <a href="#">3074</a>  | 449.7999 | 1346.3777 | 1345.7102 | 0.6675  | 0 | 13  | 8.6     | 2 | K.DVISIELHHGAR.K                                                                                                          |
| <a href="#">3422</a>  | 690.1941 | 1378.3737 | 1378.6728 | -0.2991 | 0 | 76  | 4.3e-06 | 1 | K.NAETGLYDVEIR.N                                                                                                          |
| <a href="#">5118</a>  | 785.6426 | 1569.2707 | 1568.8311 | 0.4396  | 0 | 40  | 0.016   | 1 | K.DLSHIAVTFGRPEK.D <a href="#">5113</a> <a href="#">5120</a> <a href="#">5128</a> <a href="#">5129</a>                    |
| <a href="#">6324</a>  | 834.2441 | 1666.4737 | 1665.9301 | 0.5436  | 0 | 100 | 1.4e-08 | 1 | R.ITAQPGVEIITSPNVK.D <a href="#">6327</a>                                                                                 |
| <a href="#">6883</a>  | 853.9671 | 1705.9197 | 1705.8828 | 0.0370  | 0 | 14  | 6.5     | 1 | R.YVYAHFPINVNIEK.N                                                                                                        |
| <a href="#">10282</a> | 690.1942 | 2067.5607 | 2067.0273 | 0.5335  | 1 | 35  | 0.047   | 1 | K.NAETGLYDVEIRNFLGEK.Y                                                                                                    |

67. [gi|212283871|gb|ACJ23337.1|](#) Mass: 19727 Score: 374 Queries matched: 43 emPAI: 1.57

glyceraldehyde-3-phosphate dehydrogenase [Aspergillus flavus]

| Query                 | Observed | Mr(expt)  | Mr(calc)  | Delta   | Miss | Score | Expect  | Rank | Peptide                                                                                                              |
|-----------------------|----------|-----------|-----------|---------|------|-------|---------|------|----------------------------------------------------------------------------------------------------------------------|
| <a href="#">288</a>   | 414.9126 | 827.8107  | 826.4912  | 1.3195  | 0    | 3     | 87      | 8    | K.VIPSLNGK.L                                                                                                         |
| <a href="#">1959</a>  | 606.8806 | 1211.7467 | 1211.6662 | 0.0805  | 0    | 54    | 0.00054 | 1    | K.AGIALNEHFIL.L <a href="#">1965</a> <a href="#">1974</a>                                                            |
| <a href="#">2616</a>  | 648.4811 | 1294.9477 | 1295.6609 | -0.7131 | 1    | 5     | 51      | 4    | R.TEKAVTYEDIK.K <a href="#">2617</a>                                                                                 |
| <a href="#">3816</a>  | 477.2295 | 1428.6667 | 1428.7572 | -0.0905 | 0    | 3     | 74      | 9    | R.TAAQNIIPSSTGAAK.A                                                                                                  |
| <a href="#">4716</a>  | 765.8826 | 1529.7507 | 1529.7872 | -0.0365 | 0    | 78    | 2.4e-06 | 1    | R.VPTANVSVVDLTCR.T <a href="#">4720</a> <a href="#">4722</a> <a href="#">4728</a>                                    |
| <a href="#">5516</a>  | 535.6415 | 1603.9027 | 1602.8586 | 1.0442  | 1    | 9     | 20      | 2    | K.VIPSLNGKLTGMSMR.V <a href="#">5513</a>                                                                             |
| <a href="#">9426</a>  | 659.2422 | 1974.7047 | 1974.0754 | 0.6293  | 2    | 5     | 47      | 2    | K.AVGKVIPSLNGKLTGMSMR.V <a href="#">9416</a>                                                                         |
| <a href="#">9559</a>  | 664.7742 | 1991.3007 | 1990.0703 | 1.2304  | 2    | (3)   | 76      | 4    | K.AVGKVIPSLNGKLTGMSMR.V <a href="#">9577</a>                                                                         |
| <a href="#">14163</a> | 880.5125 | 2638.5157 | 2637.3109 | 1.2049  | 0    | 74    | 5.2e-06 | 1    | K.VINDNFGLVEGLMTTVHSYTATQK.T <a href="#">14164</a> <a href="#">14167</a> <a href="#">14172</a> <a href="#">14178</a> |
| <a href="#">14251</a> | 885.6075 | 2653.8007 | 2652.2887 | 1.5120  | 1    | 10    | 11      | 2    | K.EYKTDINVLSNASCATNCLAPLAK.V                                                                                         |
| <a href="#">14258</a> | 886.0669 | 2655.1787 | 2653.3058 | 1.8729  | 0    | (28)  | 0.17    | 1    | K.VINDNFGLVEGLMTTVHSYTATQK.T <a href="#">14259</a> <a href="#">14264</a>                                             |
| <a href="#">15142</a> | 951.9865 | 2852.9377 | 2851.3764 | 1.5614  | 0    | 52    | 0.00069 | 1    | K.GILGYTEDDIVSTDLIGDAHSSIFDAK.A <a href="#">15134</a> <a href="#">15135</a> <a href="#">15141</a> <a href="#">15</a> |

68. [gi|220694447|gb|EED50791.1|](#) Mass: 24223 Score: 366 Queries matched: 29 emPAI: 1.47

ATP synthase oligomycin sensitivity conferral protein, putative [Aspergillus flavus NRRL3357]

| Query                | Observed | Mr(expt)  | Mr(calc)  | Delta  | Miss | Score | Expect  | Rank | Peptide                                                        |
|----------------------|----------|-----------|-----------|--------|------|-------|---------|------|----------------------------------------------------------------|
| <a href="#">886</a>  | 500.8191 | 999.6237  | 999.5964  | 0.0273 | 0    | 61    | 0.00013 | 1    | K.ALSALGEVLK.A <a href="#">888</a>                             |
| <a href="#">1215</a> | 537.2476 | 1072.4807 | 1071.5924 | 0.8883 | 0    | 41    | 0.015   | 1    | K.SQIVQELQK.L <a href="#">1213</a>                             |
| <a href="#">1456</a> | 559.6141 | 1117.2137 | 1116.5849 | 0.6288 | 0    | 47    | 0.0034  | 1    | R.LGLLEGVCEK.F                                                 |
| <a href="#">2841</a> | 661.1161 | 1320.2177 | 1319.6469 | 0.5708 | 0    | 34    | 0.071   | 1    | K.NFLETLAENNR.L                                                |
| <a href="#">4356</a> | 744.9361 | 1487.8577 | 1486.8243 | 1.0335 | 0    | 45    | 0.005   | 1    | K.LTGLISAPTLTASDK.S <a href="#">4342</a>                       |
| <a href="#">5668</a> | 808.7691 | 1615.5237 | 1614.9192 | 0.6045 | 1    | 80    | 1.4e-06 | 1    | R.KLTGLISAPTLTASDK.S <a href="#">5667</a> <a href="#">5694</a> |
| <a href="#">6038</a> | 823.6196 | 1645.2247 | 1644.8206 | 0.4041 | 0    | 4     | 56      | 4    | R.GEIDLNITSAQELDK.K <a href="#">6024</a> <a href="#">6042</a>  |

|                       |          |           |           |         |   |    |        |    |                               |                      |                      |                      |                      |                      |                      |                     |
|-----------------------|----------|-----------|-----------|---------|---|----|--------|----|-------------------------------|----------------------|----------------------|----------------------|----------------------|----------------------|----------------------|---------------------|
| <a href="#">6120</a>  | 826.6636 | 1651.3127 | 1650.8941 | 0.4186  | 0 | 59 | 0.0002 | 1  | K.VNPDLVGGLVVEIGDR.T          | <a href="#">6119</a> | <a href="#">6128</a> | <a href="#">6129</a> | <a href="#">6132</a> | <a href="#">6133</a> | <a href="#">6134</a> | <a href="#">614</a> |
| <a href="#">6429</a>  | 837.8026 | 1673.5907 | 1672.8896 | 0.7011  | 2 | 4  | 53     | 5  | R.LEKAVSQSHFSQGKK.L           |                      |                      |                      |                      |                      |                      |                     |
| <a href="#">7594</a>  | 888.7181 | 1775.4217 | 1772.9156 | 2.5062  | 1 | 3  | 75     | 4  | R.GEIDLNITSAQELDKK.T          |                      |                      |                      |                      |                      |                      |                     |
| <a href="#">13895</a> | 861.3982 | 2581.1727 | 2581.3963 | -0.2236 | 1 | 2  | 69     | 8  | K.VNPDLVGGLVVEIGDRTIDLSVSSK.I |                      |                      |                      |                      |                      |                      |                     |
| <a href="#">14132</a> | 878.2962 | 2631.8667 | 2629.3170 | 2.5498  | 1 | 1  | 85     | 10 | K.FATLMGAHRGEIDLNITSAQELDK.K  |                      |                      |                      |                      |                      |                      |                     |
| <a href="#">14875</a> | 925.4415 | 2773.3027 | 2773.4068 | -0.1041 | 2 | 0  | 1e+02  | 1  | K.FATLMGAHRGEIDLNITSAQELDKK.T |                      |                      |                      |                      |                      |                      |                     |

69. [gi|220692495|gb|EED48841.1|](#) Mass: 40719 Score: 363 Queries matched: 23 emPAI: 0.87

pyruvate dehydrogenase E1 beta subunit PdbA, putative [Aspergillus flavus NRRL3357]

| Query                 | Observed  | Mr(expt)  | Mr(calc)  | Delta   | Miss | Score | Expect  | Rank | Peptide                                                                                                 |
|-----------------------|-----------|-----------|-----------|---------|------|-------|---------|------|---------------------------------------------------------------------------------------------------------|
| <a href="#">1919</a>  | 603.3651  | 1204.7157 | 1203.5772 | 1.1386  | 0    | 27    | 0.36    | 1    | K.VVSPWSEDAK.G <a href="#">1910</a>                                                                     |
| <a href="#">5512</a>  | 535.5685  | 1603.6837 | 1601.8447 | 1.8391  | 1    | 8     | 27      | 3    | R.CVGLSLNAAELKEK.Y                                                                                      |
| <a href="#">6174</a>  | 828.5321  | 1655.0497 | 1654.9505 | 0.0992  | 0    | 72    | 8.6e-06 | 1    | R.SVKPLDVETIVQSLK.K <a href="#">6180</a> <a href="#">6183</a> <a href="#">6192</a> <a href="#">6208</a> |
| <a href="#">7366</a>  | 879.2811  | 1756.5477 | 1755.8526 | 0.6951  | 0    | 86    | 4e-07   | 1    | R.DALNEALAELETNPK.T <a href="#">7356</a>                                                                |
| <a href="#">7634</a>  | 594.0742  | 1779.2007 | 1781.0536 | -1.8529 | 2    | 9     | 18      | 7    | M.AAPRLFRPAARLLSSR.L                                                                                    |
| <a href="#">7693</a>  | 595.4992  | 1783.4757 | 1783.0455 | 0.4302  | 1    | 46    | 0.0035  | 1    | R.SVKPLDVETIVQSLKK.T                                                                                    |
| <a href="#">8901</a>  | 637.2899  | 1908.8477 | 1910.1326 | -1.2849 | 2    | 3     | 73      | 5    | R.LFRPAARLLSSRLSAPR.R                                                                                   |
| <a href="#">15074</a> | 944.2569  | 2829.7487 | 2831.4851 | -1.7364 | 2    | 4     | 42      | 5    | R.CVGLSLNAAELKEKYGVDAEVINLR.S <a href="#">15080</a>                                                     |
| <a href="#">15132</a> | 951.4022  | 2851.1847 | 2848.3569 | 2.8278  | 0    | 45    | 0.0034  | 1    | R.GPNGFAAGVAAQHSQDYSAWYGSIPGLK.V <a href="#">15127</a>                                                  |
| <a href="#">15167</a> | 954.7382  | 2861.1927 | 2858.4160 | 2.7767  | 0    | 29    | 0.12    | 1    | R.DPNPVVVLENELLYGQAFPMSEAAQK.D <a href="#">15168</a>                                                    |
| <a href="#">16010</a> | 1090.9755 | 3269.9047 | 3269.6754 | 0.2293  | 1    | 61    | 6.9e-05 | 1    | K.AAIRDPNPVVVLENELLYGQAFPMSEAAQK.D <a href="#">16014</a>                                                |
| <a href="#">16061</a> | 1097.0072 | 3287.9997 | 3285.6703 | 2.3294  | 1    | (14)  | 3.2     | 1    | K.AAIRDPNPVVVLENELLYGQAFPMSEAAQK.D <a href="#">16065</a>                                                |

70. [gi|220694367|gb|EED50711.1|](#) Mass: 44490 Score: 362 Queries matched: 41 emPAI: 0.77

60S ribosomal protein L3 [Aspergillus flavus NRRL3357]

| Query                | Observed | Mr(expt)  | Mr(calc)  | Delta   | Miss | Score | Expect  | Rank | Peptide                             |
|----------------------|----------|-----------|-----------|---------|------|-------|---------|------|-------------------------------------|
| <a href="#">14</a>   | 635.4920 | 634.4847  | 634.3472  | 0.1375  | 0    | 16    | 4.9     | 1    | R.VMTLR.K                           |
| <a href="#">27</a>   | 650.4840 | 649.4767  | 649.3435  | 0.1332  | 0    | 25    | 0.51    | 1    | R.NLFEK.T <a href="#">28</a>        |
| <a href="#">124</a>  | 734.8480 | 733.8407  | 732.4018  | 1.4390  | 1    | 8     | 29      | 5    | K.KDLVTSA.-                         |
| <a href="#">146</a>  | 749.5280 | 748.5207  | 748.4483  | 0.0724  | 0    | 34    | 0.075   | 1    | R.AFLGTLK.K <a href="#">148</a>     |
| <a href="#">712</a>  | 483.5826 | 965.1507  | 964.4978  | 0.6529  | 0    | 19    | 2       | 1    | K.TLYPQTSR.K <a href="#">711</a>    |
| <a href="#">932</a>  | 507.5866 | 1013.1587 | 1012.5454 | 0.6133  | 0    | 60    | 0.00015 | 1    | R.HGSLAYLPR.K <a href="#">931</a>   |
| <a href="#">1387</a> | 553.7266 | 1105.4387 | 1104.5750 | 0.8637  | 0    | 48    | 0.0025  | 1    | K.QITPMGGFVR.Y <a href="#">1384</a> |
| <a href="#">1486</a> | 561.6296 | 1121.2447 | 1120.5699 | 0.6748  | 0    | (28)  | 0.25    | 1    | K.QITPMGGFVR.Y <a href="#">1489</a> |
| <a href="#">2306</a> | 631.6991 | 1261.3837 | 1262.6448 | -1.2610 | 2    | 6     | 47      | 6    | R.FYKNWYKSK.K <a href="#">2311</a>  |
| <a href="#">2527</a> | 643.5826 | 1285.1507 | 1284.6058 | 0.5449  | 0    | 59    | 0.00022 | 1    | K.QHAESGASITR.E                     |
| <a href="#">2944</a> | 666.6096 | 1331.2047 | 1330.7067 | 0.4980  | 0    | 2     | 1e+02   | 5    | K.KPVHLTASMGYK.A                    |
| <a href="#">4150</a> | 732.8716 | 1463.7287 | 1462.8395 | 0.8892  | 2    | 1     | 1.3e+02 | 3    | R.AFLGTLKKDLVTSA.-                  |
| <a href="#">6044</a> | 823.7296 | 1645.4447 | 1646.8012 | -1.3565 | 1    | 7     | 30      | 2    | K.YAQHAESGASITR.E                   |

|                       |                  |                  |                  |                |   |           |                |          |                                                                                            |
|-----------------------|------------------|------------------|------------------|----------------|---|-----------|----------------|----------|--------------------------------------------------------------------------------------------|
| <a href="#">6746</a>  | 849.2041         | 1696.3937        | 1696.8607        | -0.4670        | 1 | 6         | 38             | 6        | K.QITPMGGFVRYGEVK.N <a href="#">6749</a>                                                   |
| <a href="#">6931</a>  | 571.1635         | 1710.4687        | 1708.9294        | 1.5393         | 2 | 4         | 64             | 8        | R.VM <del>T</del> LRK <del>T</del> LYPQTSR.K                                               |
| <a href="#">6986</a>  | <b>858.6311</b>  | <b>1715.2477</b> | <b>1713.8574</b> | <b>1.3904</b>  | 0 | <b>65</b> | <b>5.1e-05</b> | <b>1</b> | R.SLTTVWAEHLSDEVK.R <a href="#">6987</a>                                                   |
| <a href="#">7852</a>  | 600.2645         | 1797.7717        | 1795.9250        | 1.8467         | 1 | 1         | 1e+02          | 7        | K.KAHLMEIQVNGGSVADK.V                                                                      |
| <a href="#">7898</a>  | <b>902.2686</b>  | <b>1802.5227</b> | <b>1801.9033</b> | <b>0.6195</b>  | 1 | 5         | 45             | 1        | K.DDPK <del>K</del> PVHLTASMGYK.A                                                          |
| <a href="#">7983</a>  | 906.8221         | 1811.6297        | 1811.8762        | -0.2464        | 1 | 4         | 59             | 4        | K.QHAESGASITRELER.I                                                                        |
| <a href="#">8265</a>  | 615.3782         | 1843.1127        | 1843.0251        | 0.0877         | 2 | 2         | 93             | 5        | K.KYCTVVRVLAHTQIR.K                                                                        |
| <a href="#">10857</a> | 716.4619         | 2146.3637        | 2146.1391        | 0.2246         | 1 | (1)       | 1e+02          | 8        | K.KPVHLTASMGYKAGMTTVVR.D                                                                   |
| <a href="#">10894</a> | <b>1076.6446</b> | <b>2151.2747</b> | <b>2150.9545</b> | <b>0.3202</b>  | 0 | <b>88</b> | <b>1.9e-07</b> | <b>1</b> | K.WVDTSSSEFGHGAFQTPEEK.R <a href="#">10896</a> <a href="#">10898</a> <a href="#">10907</a> |
| <a href="#">10969</a> | <b>722.2192</b>  | <b>2163.6357</b> | <b>2162.1340</b> | <b>1.5017</b>  | 1 | 5         | 42             | 1        | K.KPVHLTASMGYKAGMTTVVR.D                                                                   |
| <a href="#">11551</a> | 748.7442         | 2243.2107        | 2245.1565        | -1.9458        | 2 | 3         | 59             | 4        | K.SFPKDDPKKPVHLTASMGYK.A <a href="#">11561</a>                                             |
| <a href="#">11987</a> | <b>769.7309</b>  | <b>2306.1707</b> | <b>2307.0556</b> | <b>-0.8849</b> | 1 | 7         | 23             | 1        | K.WVDTSSSEFGHGAFQTPEEK.R.A                                                                 |
| <a href="#">13682</a> | 849.2042         | 2544.5907        | 2546.2662        | -1.6755        | 2 | 0         | 1.1e+02        | 7        | K.QITPMGGFVRYGEVKND <del>F</del> VMVK.G                                                    |
| <a href="#">14953</a> | 930.7699         | 2789.2877        | 2786.3181        | 2.9696         | 2 | 2         | 60             | 5        | K.GSDEANASTDFDISKQITPMGGFVR.Y <a href="#">14941</a>                                        |

71. [gi|220689219|gb|EED45570.1|](#) Mass: 28314 Score: 357 Queries matched: 43 emPAI: 1.72

ribosomal protein S5 [Aspergillus flavus NRRL3357]

| Query                 | Observed        | Mr(expt)         | Mr(calc)         | Delta          | Miss | Score      | Expect         | Rank     | Peptide                                                                                                                                                                |
|-----------------------|-----------------|------------------|------------------|----------------|------|------------|----------------|----------|------------------------------------------------------------------------------------------------------------------------------------------------------------------------|
| <a href="#">36</a>    | 666.5970        | 665.5897         | 665.4224         | 0.1673         | 0    | 7          | 25             | 1        | R.LIPAPR.G                                                                                                                                                             |
| <a href="#">66</a>    | 687.4980        | 686.4907         | 686.4326         | 0.0581         | 0    | 30         | 0.23           | 2        | R.AAITIAK.L <a href="#">67</a>                                                                                                                                         |
| <a href="#">178</a>   | <b>384.4386</b> | <b>766.8627</b>  | <b>766.5065</b>  | <b>0.3562</b>  | 0    | <b>35</b>  | <b>0.038</b>   | <b>1</b> | K.LAVLPVR.R                                                                                                                                                            |
| <a href="#">269</a>   | <b>818.4440</b> | <b>817.4367</b>  | <b>817.4545</b>  | <b>-0.0178</b> | 0    | <b>22</b>  | <b>1.4</b>     | <b>1</b> | K.TLENTLK.A <a href="#">271</a>                                                                                                                                        |
| <a href="#">470</a>   | <b>887.5560</b> | <b>886.5487</b>  | <b>886.4549</b>  | <b>0.0939</b>  | 0    | <b>20</b>  | <b>2.2</b>     | <b>1</b> | K.EWQPVTK.L                                                                                                                                                            |
| <a href="#">879</a>   | 500.5621        | 999.1097         | 998.5761         | 0.5337         | 0    | 30         | 0.15           | 1        | R.GTGLVASPAVK.R <a href="#">877</a> <a href="#">878</a> <a href="#">880</a> <a href="#">883</a>                                                                        |
| <a href="#">2305</a>  | 631.6761        | 1261.3377        | 1260.6350        | 0.7027         | 0    | 5          | 54             | 8        | R.SPLEEFGDVL.R.Q                                                                                                                                                       |
| <a href="#">3584</a>  | <b>699.9946</b> | <b>1397.9747</b> | <b>1397.7231</b> | <b>0.2516</b>  | 0    | <b>43</b>  | <b>0.0068</b>  | <b>1</b> | K.EYQIVDFFLPK.L <a href="#">3588</a> <a href="#">3607</a> <a href="#">3610</a>                                                                                         |
| <a href="#">5995</a>  | <b>548.7559</b> | <b>1643.2457</b> | <b>1642.9042</b> | <b>0.3415</b>  | 1    | <b>7</b>   | <b>29</b>      | <b>1</b> | K.LIRSPLEEFGDVL.R.Q                                                                                                                                                    |
| <a href="#">6051</a>  | 824.1161        | 1646.2177        | 1645.9879        | 0.2298         | 1    | 3          | 73             | 6        | R.LIPAPRGTGLVASPAVK.R                                                                                                                                                  |
| <a href="#">6480</a>  | <b>839.7666</b> | <b>1677.5187</b> | <b>1676.9461</b> | <b>0.5726</b>  | 0    | <b>32</b>  | <b>0.091</b>   | <b>1</b> | K.AVVIIGDSEGHIGLGIK.T <a href="#">6469</a> <a href="#">6476</a> <a href="#">6483</a> <a href="#">6484</a> <a href="#">6485</a> <a href="#">6492</a> <a href="#">64</a> |
| <a href="#">7231</a>  | <b>871.3496</b> | <b>1740.6847</b> | <b>1739.8631</b> | <b>0.8216</b>  | 0    | <b>56</b>  | <b>0.00033</b> | <b>1</b> | R.GYWGSNLGEPHSLPK.Q <a href="#">7187</a> <a href="#">7234</a> <a href="#">7235</a>                                                                                     |
| <a href="#">7548</a>  | <b>886.8741</b> | <b>1771.7337</b> | <b>1771.9542</b> | <b>-0.2205</b> | 0    | <b>83</b>  | <b>6.6e-07</b> | <b>1</b> | K.ITSMEQIYLHSLPIK.E <a href="#">7559</a> <a href="#">7561</a> <a href="#">7576</a> <a href="#">7581</a>                                                                |
| <a href="#">7762</a>  | 597.3822        | 1789.1247        | 1787.9491        | 1.1756         | 0    | (3)        | 69             | 4        | K.ITSMEQIYLHSLPIK.E                                                                                                                                                    |
| <a href="#">9046</a>  | <b>963.6766</b> | <b>1925.3387</b> | <b>1924.9742</b> | <b>0.3645</b>  | 0    | <b>115</b> | <b>4.5e-10</b> | <b>1</b> | R.LLQLAGVQDAYTSSSGSTK.T <a href="#">9052</a> <a href="#">9060</a>                                                                                                      |
| <a href="#">9584</a>  | 997.5876        | 1993.1607        | 1993.1208        | 0.0399         | 1    | 1          | 1.2e+02        | 2        | K.AVVIIGDSEGHIGLGIKTSK.E                                                                                                                                               |
| <a href="#">11304</a> | 737.1885        | 2208.5437        | 2209.2583        | -0.7146        | 2    | 3          | 68             | 9        | R.TRFKAVVIIGDSEGHIGLGIK.T <a href="#">11305</a>                                                                                                                        |

72. [gi|220690388|gb|EED46738.1|](#) Mass: 14963 Score: 353 Queries matched: 16 emPAI: 0.51

histone H2B [Aspergillus flavus NRRL3357]

| Query | Observed | Mr(expt) | Mr(calc) | Delta | Miss | Score | Expect | Rank | Peptide |
|-------|----------|----------|----------|-------|------|-------|--------|------|---------|
|-------|----------|----------|----------|-------|------|-------|--------|------|---------|

|                      |          |           |           |         |   |      |         |   |                                                                                    |
|----------------------|----------|-----------|-----------|---------|---|------|---------|---|------------------------------------------------------------------------------------|
| <a href="#">663</a>  | 477.7496 | 953.4847  | 952.5957  | 0.8890  | 0 | 29   | 0.17    | 1 | R.LILPGELAK.H <a href="#">661</a>                                                  |
| <a href="#">1672</a> | 577.2411 | 1152.4677 | 1152.5339 | -0.0662 | 0 | 18   | 2.4     | 1 | K.ETYSSYIYK.V                                                                      |
| <a href="#">2496</a> | 641.7171 | 1281.4197 | 1280.6288 | 0.7909  | 1 | 3    | 83      | 2 | R.KETYSSYIYK.V                                                                     |
| <a href="#">3934</a> | 481.0392 | 1440.0957 | 1437.7939 | 2.3018  | 2 | 13   | 7.4     | 8 | K.LAAYNKKSTISSR.E                                                                  |
| <a href="#">4918</a> | 775.4086 | 1548.8027 | 1549.8577 | -1.0549 | 1 | 4    | 61      | 2 | K.VLKQVHPDTGISTR.A                                                                 |
| <a href="#">4965</a> | 777.2166 | 1552.4187 | 1553.8525 | -1.4338 | 2 | 1    | 1.2e+02 | 6 | K.AAEKKPSTGGKAPAGGK.A                                                              |
| <a href="#">7349</a> | 878.3766 | 1754.7387 | 1754.8661 | -0.1274 | 0 | (86) | 3.4e-07 | 1 | R.AMSILNSFVNDIFER.V <a href="#">7365</a> <a href="#">7372</a> <a href="#">7375</a> |
| <a href="#">7422</a> | 882.0591 | 1762.1037 | 1761.9989 | 0.1049  | 1 | 0    | 1.3e+02 | 5 | R.LILPGELAKHAVSEGTK.A                                                              |
| <a href="#">7536</a> | 886.6126 | 1771.2107 | 1770.8611 | 0.3497  | 0 | 94   | 6.3e-08 | 1 | R.AMSILNSFVNDIFER.V <a href="#">7516</a> <a href="#">7540</a> <a href="#">7541</a> |

73. [gi|220695061|gb|EED51404.1|](#) Mass: 57300 Score: 352 Queries matched: 18 emPAI: 0.40

4-aminobutyrate transaminase GatA [Aspergillus flavus NRRL3357]

| Query                 | Observed  | Mr(expt)  | Mr(calc)  | Delta   | Miss | Score | Expect  | Rank | Peptide                                                |
|-----------------------|-----------|-----------|-----------|---------|------|-------|---------|------|--------------------------------------------------------|
| <a href="#">974</a>   | 513.0636  | 1024.1127 | 1024.5665 | -0.4538 | 0    | 7     | 31      | 7    | R.TISTTPHLR.A                                          |
| <a href="#">2533</a>  | 643.8481  | 1285.6817 | 1285.6302 | 0.0515  | 0    | 62    | 0.0001  | 1    | K.TGEYLYSGLQR.L <a href="#">2538</a>                   |
| <a href="#">2849</a>  | 661.7471  | 1321.4797 | 1319.6510 | 1.8287  | 0    | 65    | 5.2e-05 | 1    | K.GQGTFIAWDTPK.R <a href="#">2844</a>                  |
| <a href="#">2926</a>  | 665.7946  | 1329.5747 | 1327.7208 | 1.8539  | 0    | 4     | 66      | 9    | K.GVGVNIGSGVSAVR.L <a href="#">2898</a>                |
| <a href="#">3872</a>  | 718.1776  | 1434.3407 | 1433.7514 | 0.5893  | 1    | 18    | 2.5     | 1    | K.AATAELDKVFDVR.S                                      |
| <a href="#">5530</a>  | 803.6986  | 1605.3827 | 1603.8769 | 1.5058  | 0    | 3     | 75      | 5    | R.LRPMLIFQQHHGK.S                                      |
| <a href="#">5599</a>  | 537.9832  | 1610.9277 | 1609.8576 | 1.0701  | 1    | 29    | 0.2     | 1    | R.LAEKYPEHLQNL.R                                       |
| <a href="#">9170</a>  | 971.8526  | 1941.6907 | 1941.0036 | 0.6871  | 0    | 67    | 2.8e-05 | 1    | K.LDIPAFDWPQAPFSLK.Y <a href="#">9168</a>              |
| <a href="#">11918</a> | 767.0439  | 2298.1097 | 2299.1498 | -1.0400 | 0    | 11    | 11      | 1    | K.AQTAGYYYGNPALRPNKPYR.Q <a href="#">11924</a>         |
| <a href="#">13011</a> | 820.7649  | 2459.2727 | 2457.1212 | 2.1515  | 0    | 21    | 0.87    | 1    | K.FWAHDHWNLETPPDMVTFK.K                                |
| <a href="#">13320</a> | 833.3335  | 2496.9787 | 2498.2111 | -1.2324 | 1    | 0     | 1.1e+02 | 8    | K.VAPKGLNQVFTAMAGSDANETAYK.A                           |
| <a href="#">15820</a> | 1054.5105 | 3160.5097 | 3159.5163 | 0.9935  | 0    | 75    | 2.8e-06 | 1    | K.EWHNPVAAVVVEPIQSEGGDNHASPFFR.G <a href="#">15819</a> |

74. [gi|220694917|gb|EED51260.1|](#) Mass: 41841 Score: 350 Queries matched: 26 emPAI: 0.58

actin Act1 [Aspergillus flavus NRRL3357]

| Query                | Observed | Mr(expt)  | Mr(calc)  | Delta   | Miss | Score | Expect  | Rank | Peptide                                                          |
|----------------------|----------|-----------|-----------|---------|------|-------|---------|------|------------------------------------------------------------------|
| <a href="#">40</a>   | 672.5430 | 671.5357  | 671.4330  | 0.1027  | 0    | 8     | 33      | 9    | R.GILTLR.Y <a href="#">42</a>                                    |
| <a href="#">420</a>  | 872.5690 | 871.5617  | 871.5127  | 0.0490  | 1    | 9     | 24      | 8    | R.EIVRDIK.E                                                      |
| <a href="#">938</a>  | 508.3311 | 1014.6477 | 1013.4739 | 1.1738  | 0    | 14    | 7.5     | 2    | R.DLTDYLMK.I                                                     |
| <a href="#">1555</a> | 566.6851 | 1131.3557 | 1131.5197 | -0.1639 | 0    | 42    | 0.011   | 1    | R.GYTFSTTAER.E <a href="#">1561</a>                              |
| <a href="#">1652</a> | 574.5906 | 1147.1667 | 1146.5954 | 0.5713  | 0    | 9     | 22      | 4    | K.EITALAPSSMK.V                                                  |
| <a href="#">1720</a> | 582.8191 | 1163.6237 | 1162.5903 | 1.0334  | 0    | (5)   | 55      | 1    | K.EITALAPSSMK.V                                                  |
| <a href="#">4919</a> | 775.4246 | 1548.8347 | 1549.7844 | -0.9496 | 1    | 4     | 55      | 6    | R.MQKEITALAPSSMK.V                                               |
| <a href="#">5992</a> | 548.5572 | 1642.6497 | 1643.7903 | -1.1406 | 1    | 1     | 1.3e+02 | 9    | K.QEYDESGPSIVHRK.C                                               |
| <a href="#">7775</a> | 896.1461 | 1790.2777 | 1789.8846 | 0.3931  | 0    | 89    | 1.8e-07 | 1    | K.SYELPDGQVITIGNER.F <a href="#">7777</a> <a href="#">7799</a>   |
| <a href="#">9261</a> | 977.6231 | 1953.2317 | 1953.0571 | 0.1746  | 0    | 40    | 0.013   | 1    | R.VAPEEHPVLLTEAPINPK.S <a href="#">9269</a> <a href="#">9276</a> |

|                       |           |           |           |         |   |     |         |   |                                                         |
|-----------------------|-----------|-----------|-----------|---------|---|-----|---------|---|---------------------------------------------------------|
| <a href="#">11434</a> | 742.6752  | 2225.0037 | 2225.1184 | -0.1147 | 2 | (1) | 96      | 5 | R.VDMAGRDLTDYLMKILAER.G                                 |
| <a href="#">11548</a> | 748.6749  | 2243.0027 | 2241.1133 | 1.8894  | 2 | 5   | 38      | 2 | R.VDMAGRDLTDYLMKILAER.G                                 |
| <a href="#">11653</a> | 754.4299  | 2260.2677 | 2262.0297 | -1.7620 | 0 | 1   | 91      | 2 | K.DLYGNIVMSGGTTMYPGISDR.M                               |
| <a href="#">12522</a> | 796.8322  | 2387.4747 | 2387.0998 | 0.3749  | 1 | 1   | 91      | 7 | R.HHGIMIGMGQKDSYVGDEAQS.K.R                             |
| <a href="#">14219</a> | 883.6535  | 2647.9387 | 2645.2530 | 2.6857  | 0 | 4   | 46      | 1 | K.LCYVALDFEQEIQTASQSSSLEK.S                             |
| <a href="#">14903</a> | 927.6765  | 2780.0077 | 2778.2589 | 1.7488  | 1 | 2   | 72      | 1 | M.EEEVAALVIDNGSGMCKAGFAGDDAPR.A                         |
| <a href="#">15333</a> | 982.3429  | 2944.0067 | 2942.5212 | 1.4855  | 0 | 54  | 0.00039 | 1 | R.APEALFQPSVLGLESGGIHTVTFNSIMK.C <a href="#">15329</a>  |
| <a href="#">15764</a> | 1041.7152 | 3122.1237 | 3120.6244 | 1.4993  | 0 | 75  | 3e-06   | 1 | R.TTGIVLDSGDGVTHVVIYEGFALPHAISR.V <a href="#">15761</a> |

75. [gi|220694374|gb|EED50718.1|](#) Mass: 54772 Score: 345 Queries matched: 34 emPAI: 0.42

adenylosuccinate lyase Adel3, putative [Aspergillus flavus NRRL3357]

| Query                 | Observed  | Mr(expt)  | Mr(calc)  | Delta   | Miss | Score | Expect  | Rank | Peptide                                                                          |
|-----------------------|-----------|-----------|-----------|---------|------|-------|---------|------|----------------------------------------------------------------------------------|
| <a href="#">435</a>   | 438.9266  | 875.8387  | 875.4348  | 0.4039  | 0    | 20    | 2       | 1    | R.SLDDSAIR.R                                                                     |
| <a href="#">1377</a>  | 552.4481  | 1102.8817 | 1102.6022 | 0.2795  | 0    | 18    | 3.2     | 1    | K.ALEPYAAAVAK.A <a href="#">1376</a>                                             |
| <a href="#">2070</a>  | 616.6076  | 1231.2007 | 1230.6972 | 0.5036  | 1    | 12    | 11      | 2    | K.KALEPYAAAVAK.A                                                                 |
| <a href="#">2667</a>  | 651.3521  | 1300.6897 | 1300.6874 | 0.0023  | 0    | 87    | 3.4e-07 | 1    | K.VEQLDELVTQK.A <a href="#">2674</a>                                             |
| <a href="#">2729</a>  | 436.9692  | 1307.8857 | 1308.7150 | -0.8293 | 1    | 5     | 51      | 7    | R.VLSHQAADNVKK.H <a href="#">2719</a>                                            |
| <a href="#">5371</a>  | 531.7249  | 1592.1527 | 1590.7719 | 1.3809  | 2    | 7     | 30      | 9    | R.NPMRSERLCSLGR.H                                                                |
| <a href="#">5719</a>  | 540.9532  | 1619.8377 | 1621.7446 | -1.9069 | 1    | 5     | 43      | 6    | R.YASDEMKYLFSPR.N <a href="#">5723</a>                                           |
| <a href="#">6059</a>  | 824.2466  | 1646.4787 | 1645.8320 | 0.6467  | 0    | 89    | 2.2e-07 | 1    | R.ACLWIQDLLMDLR.N <a href="#">6073</a>                                           |
| <a href="#">6257</a>  | 831.7121  | 1661.4097 | 1661.8269 | -0.4172 | 0    | (78)  | 2.3e-06 | 1    | R.ACLWIQDLLMDLR.N <a href="#">6270</a> <a href="#">6288</a> <a href="#">6290</a> |
| <a href="#">7312</a>  | 876.0036  | 1749.9927 | 1748.8370 | 1.1558  | 0    | 15    | 4.3     | 1    | K.AGFDSAFIISSTQYSR.K <a href="#">7311</a>                                        |
| <a href="#">9725</a>  | 671.2439  | 2010.7097 | 2008.9491 | 1.7607  | 0    | 21    | 0.99    | 1    | K.GTTGTQASFLQIFDGDHDK.V <a href="#">9717</a>                                     |
| <a href="#">9819</a>  | 675.2922  | 2022.8547 | 2023.0990 | -0.2442 | 2    | 4     | 58      | 4    | K.FTSTEVKKALEPYAAAVAK.A                                                          |
| <a href="#">9858</a>  | 676.4215  | 2026.2427 | 2023.9633 | 2.2794  | 1    | 2     | 75      | 9    | R.KIDVDVGNALGSFGSTCER.I                                                          |
| <a href="#">10769</a> | 713.6482  | 2137.9227 | 2137.0990 | 0.8237  | 0    | 26    | 0.28    | 1    | K.DLPCLGFTHGQPAQLVTVGK.R <a href="#">10784</a>                                   |
| <a href="#">10938</a> | 720.1879  | 2157.5417 | 2159.0719 | -1.5302 | 1    | 1     | 98      | 8    | R.QDAHEEIRVLSHQAADNVK.K                                                          |
| <a href="#">11057</a> | 725.7745  | 2174.3017 | 2174.0976 | 0.2041  | 1    | 1     | 1.1e+02 | 8    | R.ACLWIQDLLMDLRNLER.A                                                            |
| <a href="#">11331</a> | 1106.8056 | 2211.5967 | 2210.0421 | 1.5546  | 0    | 13    | 7.1     | 2    | R.VNDELPMATENIIMACVK.K                                                           |
| <a href="#">11351</a> | 738.6195  | 2212.8367 | 2210.0421 | 2.7946  | 0    | (4)   | 53      | 1    | R.VNDELPMATENIIMACVK.K                                                           |
| <a href="#">12179</a> | 777.9422  | 2330.8047 | 2329.0896 | 1.7151  | 2    | 1     | 1e+02   | 2    | K.EVEEPFEKDQIGSSAMAYKR.N                                                         |
| <a href="#">12375</a> | 790.5822  | 2368.7247 | 2366.1432 | 2.5815  | 1    | 1     | 1.1e+02 | 5    | R.RVNDELPMATENIIMACVK.K                                                          |
| <a href="#">14799</a> | 918.5162  | 2752.5267 | 2750.4279 | 2.0988  | 1    | 44    | 0.004   | 1    | R.RTEFFNPILGELDTLLEPSTFVGR.A <a href="#">14800</a>                               |
| <a href="#">15752</a> | 1040.6415 | 3118.9027 | 3117.5454 | 1.3573  | 2    | 5     | 33      | 1    | R.LCSLGRHLQNLPKDALDTYSAQWFER.S                                                   |

76. [gi|220701626|gb|EED57964.1|](#) Mass: 58154 Score: 338 Queries matched: 28 emPAI: 0.18

glucose-6-phosphate 1-dehydrogenase [Aspergillus flavus NRRL3357]

| Query                | Observed | Mr(expt)  | Mr(calc)  | Delta  | Miss | Score | Expect  | Rank | Peptide                             |
|----------------------|----------|-----------|-----------|--------|------|-------|---------|------|-------------------------------------|
| <a href="#">1822</a> | 593.1406 | 1184.2667 | 1183.6390 | 0.6277 | 0    | 69    | 1.8e-05 | 1    | K.TFPALFGLYR.N <a href="#">1820</a> |



|                       |           |           |           |         |   |     |         |   |                                                                                                         |
|-----------------------|-----------|-----------|-----------|---------|---|-----|---------|---|---------------------------------------------------------------------------------------------------------|
| <a href="#">1912</a>  | 602.8091  | 1203.6037 | 1204.6200 | -1.0163 | 1 | 5   | 55      | 3 | R.HLEDIEKGHK.E <a href="#">1917</a>                                                                     |
| <a href="#">2153</a>  | 622.7621  | 1243.5097 | 1241.6802 | 1.8296  | 1 | (1) | 1.4e+02 | 5 | R.VLRAMDAIEPK.N                                                                                         |
| <a href="#">2266</a>  | 629.7576  | 1257.5007 | 1257.6751 | -0.1744 | 1 | 3   | 83      | 6 | R.VLRAMDAIEPK.N                                                                                         |
| <a href="#">2487</a>  | 640.8846  | 1279.7547 | 1278.6741 | 1.0807  | 0 | 4   | 57      | 2 | -.MEISLSTIELK.D                                                                                         |
| <a href="#">3035</a>  | 671.7551  | 1341.4957 | 1340.7088 | 0.7869  | 1 | 11  | 13      | 2 | R.DLQKALEPNWK.E <a href="#">3034</a>                                                                    |
| <a href="#">3093</a>  | 450.3535  | 1348.0387 | 1347.6857 | 0.3531  | 1 | 4   | 70      | 8 | R.IDHYLGKEMVK.N                                                                                         |
| <a href="#">3947</a>  | 722.1126  | 1442.2107 | 1441.7098 | 0.5009  | 0 | 29  | 0.19    | 2 | R.CPTFCALVAYIK.N <a href="#">3951</a>                                                                   |
| <a href="#">4379</a>  | 498.0805  | 1491.2197 | 1490.7340 | 0.4857  | 1 | 2   | 85      | 7 | K.NERWDGVPFIMK.A                                                                                        |
| <a href="#">5175</a>  | 787.9811  | 1573.9477 | 1573.8603 | 0.0874  | 0 | 92  | 9.3e-08 | 1 | K.IPEAYESLILDALK.G <a href="#">5177</a> <a href="#">5186</a> <a href="#">5189</a>                       |
| <a href="#">5310</a>  | 794.6816  | 1587.3487 | 1586.7617 | 0.5870  | 0 | 68  | 2.6e-05 | 1 | R.GPAVLDDFTASFGYK.F <a href="#">5325</a> <a href="#">5328</a> <a href="#">5330</a> <a href="#">5332</a> |
| <a href="#">8910</a>  | 637.5819  | 1909.7237 | 1911.0771 | -1.3533 | 2 | 4   | 49      | 3 | K.TFPALFGLYRNKFLPK.G <a href="#">8906</a>                                                               |
| <a href="#">9961</a>  | 1019.0366 | 2036.0587 | 2035.0660 | 0.9927  | 0 | 2   | 85      | 1 | K.LPGLSMQTVVTELDLTYR.R                                                                                  |
| <a href="#">10935</a> | 1079.4736 | 2156.9327 | 2156.1228 | 0.8100  | 0 | 26  | 0.35    | 1 | R.VFYMALPPSVFTTVSEQLK.R                                                                                 |
| <a href="#">11256</a> | 734.1592  | 2199.4557 | 2200.2215 | -0.7658 | 2 | 13  | 6.4     | 1 | R.IIVEKPFKDLQSSRDLOK.A                                                                                  |
| <a href="#">15490</a> | 1008.5355 | 3022.5847 | 3023.5102 | -0.9255 | 1 | 5   | 35      | 2 | R.IFTPLLHYLDDNKEIIPMEYPYGSR.G                                                                           |

77. [gi|220700635|gb|EED56973.1|](#) Mass: 51644 Score: 337 Queries matched: 31 emPAI: 0.45

pyruvate dehydrogenase complex, dihydrolipoamide acetyltransferase [Aspergillus flavus NRRL3357]

| Query                 | Observed  | Mr(expt)  | Mr(calc)  | Delta   | Miss | Score | Expect  | Rank | Peptide                                                                       |
|-----------------------|-----------|-----------|-----------|---------|------|-------|---------|------|-------------------------------------------------------------------------------|
| <a href="#">505</a>   | 903.4750  | 902.4677  | 902.5073  | -0.0396 | 1    | 16    | 5.9     | 2    | K.VLKETGEK.E                                                                  |
| <a href="#">1015</a>  | 518.1371  | 1034.2597 | 1033.5808 | 0.6789  | 0    | 51    | 0.0014  | 1    | K.LSVNDFLVK.A <a href="#">1014</a>                                            |
| <a href="#">1604</a>  | 570.1371  | 1138.2597 | 1137.6645 | 0.5952  | 0    | 43    | 0.0068  | 1    | K.VVENPLELLL.- <a href="#">1606</a> <a href="#">1607</a> <a href="#">1610</a> |
| <a href="#">1653</a>  | 1148.1930 | 1147.1857 | 1146.6253 | 0.5604  | 1    | 10    | 20      | 3    | R.MRTPSAMLK.G                                                                 |
| <a href="#">2350</a>  | 633.9521  | 1265.8897 | 1265.7595 | 0.1303  | 1    | 32    | 0.091   | 1    | K.KVVENPLELLL.- <a href="#">2351</a>                                          |
| <a href="#">3991</a>  | 724.0566  | 1446.0987 | 1446.7864 | -0.6877 | 1    | 0     | 1.5e+02 | 7    | R.TPSAMLIKASSLR.R                                                             |
| <a href="#">4568</a>  | 759.2261  | 1516.4377 | 1515.8257 | 0.6121  | 0    | 81    | 1.2e-06 | 1    | K.NVQGLGLSSISNSIK.D                                                           |
| <a href="#">5419</a>  | 799.4776  | 1596.9407 | 1596.9311 | 0.0096  | 2    | 2     | 88      | 4    | K.LLKLRLQALNASADGK.Y                                                          |
| <a href="#">6901</a>  | 854.7931  | 1707.5717 | 1705.8676 | 1.7042  | 0    | 8     | 24      | 2    | R.ENPHFFVSTTSLSVTK.L <a href="#">6889</a> <a href="#">6898</a>                |
| <a href="#">7250</a>  | 871.8096  | 1741.6047 | 1740.9774 | 0.6273  | 2    | 1     | 1.2e+02 | 3    | K.VVDGAVGAEWIKELKK.V                                                          |
| <a href="#">9050</a>  | 963.8636  | 1925.7127 | 1925.0735 | 0.6393  | 0    | 87    | 2.5e-07 | 1    | R.FTAVINPPQAGILAVGTTR.K <a href="#">9048</a>                                  |
| <a href="#">9077</a>  | 644.1609  | 1929.4607 | 1929.0531 | 0.4076  | 1    | 0     | 1.2e+02 | 7    | K.NVQGLGLSSISNSIKDLGK.R                                                       |
| <a href="#">9126</a>  | 968.8341  | 1935.6537 | 1935.1041 | 0.5496  | 0    | 68    | 2e-05   | 1    | K.NADISVAVATPAGLITPVVK.N <a href="#">9128</a>                                 |
| <a href="#">9820</a>  | 675.3442  | 2023.0107 | 2020.0126 | 2.9981  | 0    | 11    | 11      | 1    | K.VPAVNSSWHEENGQVVIR.Q                                                        |
| <a href="#">12154</a> | 776.7219  | 2327.1437 | 2328.3165 | -1.1728 | 1    | 2     | 86      | 6    | R.QHKNADISVAVATPAGLITPVVK.N                                                   |
| <a href="#">12289</a> | 784.2842  | 2349.8307 | 2351.2678 | -1.4371 | 2    | 4     | 53      | 4    | R.TPSAMLIKASSLRRPQVMHR.F                                                      |
| <a href="#">14368</a> | 890.5915  | 2668.7527 | 2668.2625 | 0.4902  | 0    | 14    | 4.4     | 1    | K.LKPEEYQGGTFTISNMGMNPAVER.F                                                  |
| <a href="#">14492</a> | 896.2475  | 2685.7207 | 2684.2574 | 1.4633  | 0    | (2)   | 63      | 2    | K.LKPEEYQGGTFTISNMGMNPAVER.F                                                  |
| <a href="#">15253</a> | 967.4352  | 2899.2837 | 2896.4615 | 2.8222  | 0    | 4     | 37      | 3    | K.SFPPTHIIISMPALSPTMLAGNIGAWQK.K <a href="#">15254</a>                        |
| <a href="#">16326</a> | 1145.8585 | 3434.5537 | 3432.9192 | 1.6345  | 1    | 3     | 43      | 3    | K.NADISVAVATPAGLITPVVKNVQGLGLSSISNSIK.D                                       |
| <a href="#">16405</a> | 1164.7729 | 3491.2967 | 3492.7574 | -1.4606 | 1    | 1     | 63      | 9    | R.YYASKSFPPTHIIISMPALSPTMLAGNIGAWQK.K                                         |

78. [gi|220689385|gb|EED45736.1|](#) Mass: 21866 Score: 332 Queries matched: 26 empAI: 1.04

cytochrome c oxidase subunit V [Aspergillus flavus NRRL3357]

| Query                 | Observed  | Mr(expt)  | Mr(calc)  | Delta   | Miss | Score | Expect  | Rank | Peptide                                                                            |
|-----------------------|-----------|-----------|-----------|---------|------|-------|---------|------|------------------------------------------------------------------------------------|
| <a href="#">1008</a>  | 517.4991  | 1032.9837 | 1033.5226 | -0.5389 | 0    | 10    | 17      | 2    | R.SSAMPPTAIR.S                                                                     |
| <a href="#">1143</a>  | 530.4496  | 1058.8847 | 1058.5397 | 0.3451  | 0    | 22    | 1.3     | 2    | K.GFVQSPPAEK.S <a href="#">1146</a>                                                |
| <a href="#">1922</a>  | 1206.1210 | 1205.1137 | 1204.6676 | 0.4461  | 1    | 0     | 1.7e+02 | 7    | M.FLQSVSRAAAR.S                                                                    |
| <a href="#">3699</a>  | 707.9586  | 1413.9027 | 1413.6711 | 0.2316  | 0    | 30    | 0.17    | 1    | K.VDWHQMTLQEK.K <a href="#">3701</a>                                               |
| <a href="#">3751</a>  | 474.5035  | 1420.4887 | 1418.7300 | 1.7588  | 1    | 12    | 9.6     | 4    | R.AAARSSAMPPTAIR.S                                                                 |
| <a href="#">3822</a>  | 715.7041  | 1429.3937 | 1429.6660 | -0.2723 | 0    | (18)  | 2.3     | 1    | K.VDWHQMTLQEK.K                                                                    |
| <a href="#">3967</a>  | 722.7921  | 1443.5697 | 1441.7255 | 1.8442  | 0    | 52    | 0.001   | 1    | K.AAYWIAFGPHGPR.A <a href="#">3948</a> <a href="#">3958</a> <a href="#">3965</a>   |
| <a href="#">4845</a>  | 772.2251  | 1542.4357 | 1541.7660 | 0.6697  | 1    | 0     | 1.4e+02 | 4    | K.VDWHQMTLQEKK.A                                                                   |
| <a href="#">5586</a>  | 805.8901  | 1609.7657 | 1609.7988 | -0.0330 | 0    | 89    | 1.9e-07 | 1    | K.INPIYGISAEGYEGK.G <a href="#">5563</a> <a href="#">5573</a> <a href="#">5606</a> |
| <a href="#">10708</a> | 1065.2951 | 2128.5757 | 2127.9870 | 0.5887  | 0    | 83    | 6.4e-07 | 1    | R.WEAMPPQEQADLWMQLR.D <a href="#">10709</a> <a href="#">10729</a>                  |
| <a href="#">10829</a> | 1073.3421 | 2144.6697 | 2143.9819 | 0.6878  | 0    | (22)  | 0.76    | 2    | R.WEAMPPQEQADLWMQLR.D <a href="#">10828</a>                                        |
| <a href="#">12366</a> | 789.9182  | 2366.7327 | 2367.2151 | -0.4824 | 2    | 0     | 1.1e+02 | 5    | -MFLQSVSRAAARSSAMPPTAIR.S                                                          |
| <a href="#">12705</a> | 805.8359  | 2414.4857 | 2415.1100 | -0.6242 | 1    | 1     | 89      | 4    | R.WEAMPPQEQADLWMQLRDR.M                                                            |
| <a href="#">14173</a> | 880.8819  | 2639.6237 | 2639.5203 | 0.1034  | 0    | 5     | 38      | 3    | K.VAQLTAVSVALFYVIHLFAKQPK.T <a href="#">14171</a>                                  |

79. [gi|220688985|gb|EED45337.1|](#) Mass: 96832 Score: 329 Queries matched: 41 empAI: 0.18

Hsp70 chaperone (HscA), putative [Aspergillus flavus NRRL3357]

| Query                | Observed  | Mr(expt)  | Mr(calc)  | Delta   | Miss | Score | Expect  | Rank | Peptide                                                    |
|----------------------|-----------|-----------|-----------|---------|------|-------|---------|------|------------------------------------------------------------|
| <a href="#">110</a>  | 722.3680  | 721.3607  | 720.3588  | 1.0019  | 2    | 9     | 24      | 1    | K.KAMERA.-                                                 |
| <a href="#">262</a>  | 816.5500  | 815.5427  | 815.4865  | 0.0562  | 1    | 16    | 5.5     | 5    | R.VQLSKGGK.E                                               |
| <a href="#">311</a>  | 836.5020  | 835.4947  | 835.4076  | 0.0872  | 0    | 11    | 13      | 6    | R.FEDLNAK.S                                                |
| <a href="#">1207</a> | 536.3311  | 1070.6477 | 1072.5625 | -1.9148 | 1    | (15)  | 5       | 3    | K.DLSGDARALR.R <a href="#">1208</a>                        |
| <a href="#">1219</a> | 1074.0120 | 1073.0047 | 1072.5876 | 0.4171  | 0    | 6     | 47      | 7    | R.LNTDAIASLR.V                                             |
| <a href="#">1374</a> | 552.1451  | 1102.2757 | 1103.5869 | -1.3112 | 2    | 4     | 80      | 3    | R.LRTACERAK.R                                              |
| <a href="#">1774</a> | 1175.9170 | 1174.9097 | 1173.6353 | 1.2744  | 0    | 12    | 11      | 2    | R.SANITISNAVGK.L <a href="#">1772</a> <a href="#">1776</a> |
| <a href="#">1827</a> | 593.7601  | 1185.5057 | 1184.6513 | 0.8544  | 0    | 26    | 0.39    | 1    | K.DAGAISGLNVLR.I                                           |
| <a href="#">2219</a> | 626.2816  | 1250.5487 | 1248.6747 | 1.8740  | 2    | 1     | 1.2e+02 | 1    | K.MKEVAETKLGK.K                                            |
| <a href="#">2702</a> | 653.3021  | 1304.5897 | 1304.7088 | -0.1191 | 2    | 6     | 48      | 6    | R.EVRDLFEAAK.A                                             |
| <a href="#">2969</a> | 668.2046  | 1334.3947 | 1335.6340 | -1.2393 | 1    | 10    | 17      | 8    | K.AQEOMEKVTEK.G                                            |
| <a href="#">3213</a> | 680.9226  | 1359.8307 | 1358.7266 | 1.1041  | 2    | 3     | 76      | 9    | K.TGKDLSGDARALR.R                                          |
| <a href="#">4740</a> | 767.2436  | 1532.4727 | 1531.8246 | 0.6481  | 0    | 50    | 0.0016  | 1    | K.SFSGTLEPVQQLK.D <a href="#">4737</a>                     |
| <a href="#">5558</a> | 804.7446  | 1607.4747 | 1606.8103 | 0.6644  | 0    | 9     | 18      | 1    | K.AVITVPAYFNDNQR.Q <a href="#">5555</a>                    |
| <a href="#">5613</a> | 806.7571  | 1611.4997 | 1612.8896 | -1.3899 | 1    | 0     | 1.5e+02 | 5    | R.QATKDAGAISGLNVLR.I                                       |
| <a href="#">5643</a> | 807.8811  | 1613.7477 | 1610.8048 | 2.9429  | 0    | 21    | 1.2     | 1    | K.TFTPQEISSMVLK.M                                          |
| <a href="#">6275</a> | 832.3236  | 1662.6327 | 1660.8202 | 1.8125  | 2    | 6     | 43      | 2    | K.AQEOMEKVTEKGQR.E                                         |

|                       |           |           |           |        |   |     |         |    |                                                                                              |
|-----------------------|-----------|-----------|-----------|--------|---|-----|---------|----|----------------------------------------------------------------------------------------------|
| <a href="#">6302</a>  | 833.3336  | 1664.6527 | 1663.7974 | 0.8553 | 0 | 70  | 1.5e-05 | 1  | K.LSTTEIEQMIDDAAK.F <a href="#">6306</a>                                                     |
| <a href="#">6951</a>  | 571.6045  | 1711.7917 | 1710.9853 | 0.8064 | 2 | 5   | 49      | 2  | K.LRVGGRLNTDAIASLR.V                                                                         |
| <a href="#">7286</a>  | 873.8056  | 1745.5967 | 1744.9359 | 0.6608 | 0 | 101 | 1.1e-08 | 1  | R.IINEPTAAAIAYGLGSGK.S <a href="#">7294</a>                                                  |
| <a href="#">7346</a>  | 585.8459  | 1754.5157 | 1751.8685 | 2.6472 | 1 | 8   | 21      | 1  | R.VEEIISDPTMSMKLK.R <a href="#">7314</a>                                                     |
| <a href="#">8148</a>  | 610.1105  | 1827.3097 | 1824.9741 | 2.3357 | 2 | 2   | 88      | 6  | R.GRCLLQERSLAVPNGR.V                                                                         |
| <a href="#">8680</a>  | 629.7755  | 1886.3047 | 1885.9352 | 0.3696 | 1 | (1) | 1.1e+02 | 9  | K.TFTPQEISSMVLKMK.E                                                                          |
| <a href="#">8705</a>  | 630.3349  | 1887.9827 | 1885.9352 | 2.0476 | 1 | 8   | 21      | 4  | K.TFTPQEISSMVLKMK.E                                                                          |
| <a href="#">8850</a>  | 952.2366  | 1902.4587 | 1900.0126 | 2.4461 | 1 | 3   | 71      | 5  | R.LSSTLTNASSPVNLQRGR.C                                                                       |
| <a href="#">9211</a>  | 650.2899  | 1947.8477 | 1946.0255 | 1.8222 | 2 | (1) | 1e+02   | 9  | R.DQTVSVAKAAMEKATAAVR.D                                                                      |
| <a href="#">9297</a>  | 653.6969  | 1958.0687 | 1955.1204 | 2.9483 | 1 | 0   | 1.2e+02 | 10 | R.SLAVPNGRGGVSTSPDLLK.K                                                                      |
| <a href="#">9345</a>  | 655.5512  | 1963.6317 | 1962.0204 | 1.6113 | 2 | 2   | 89      | 6  | R.DQTVSVAKAAMEKATAAVR.D                                                                      |
| <a href="#">10728</a> | 1066.3191 | 2130.6237 | 2130.0957 | 0.5281 | 0 | 65  | 4.7e-05 | 1  | K.SINPDEAVAYGAAVQAGILSGK.A <a href="#">10726</a> <a href="#">10729</a> <a href="#">10730</a> |
| <a href="#">12299</a> | 784.7372  | 2351.1897 | 2349.2216 | 1.9681 | 1 | 1   | 1.1e+02 | 7  | R.FEDLNAKSFSGTLEPVQQLK.D                                                                     |

80. [gi|220699162|gb|EED55501.1|](#) Mass: 37080 Score: 323 Queries matched: 21 emPAI: 0.98

glycerol dehydrogenase (GldB), putative [Aspergillus flavus NRRL3357]

| Query                 | Observed | Mr(expt)  | Mr(calc)  | Delta   | Miss | Score | Expect  | Rank | Peptide                                                      |
|-----------------------|----------|-----------|-----------|---------|------|-------|---------|------|--------------------------------------------------------------|
| <a href="#">13</a>    | 635.4620 | 634.4547  | 634.4054  | 0.0493  | 0    | 15    | 5.1     | 4    | K.YVILK.E                                                    |
| <a href="#">1737</a>  | 584.5296 | 1167.0447 | 1166.5754 | 0.4693  | 1    | 43    | 0.0082  | 1    | K.REDIFVCTK.V <a href="#">1734</a>                           |
| <a href="#">3110</a>  | 451.0529 | 1350.1367 | 1348.6735 | 1.4632  | 1    | 11    | 11      | 4    | K.SSNPARIESNFK.S                                             |
| <a href="#">4057</a>  | 727.6941 | 1453.3737 | 1452.7249 | 0.6488  | 0    | 77    | 3.2e-06 | 1    | K.IPGVGFGTFASEGSK.G <a href="#">4069</a>                     |
| <a href="#">4332</a>  | 743.7646 | 1485.5147 | 1483.8035 | 1.7113  | 0    | 58    | 0.00022 | 1    | K.AIGVSNWTIPGLEK.L <a href="#">4328</a> <a href="#">4331</a> |
| <a href="#">5101</a>  | 784.6811 | 1567.3477 | 1567.8835 | -0.5357 | 0    | 54    | 0.00064 | 1    | K.GGNTLAQVLIAWGLR.R                                          |
| <a href="#">5573</a>  | 805.4431 | 1608.8717 | 1608.7519 | 0.1198  | 0    | 43    | 0.0071  | 2    | K.SIELTDEDFEAVNK.V <a href="#">5563</a> <a href="#">5606</a> |
| <a href="#">6203</a>  | 829.6856 | 1657.3567 | 1656.7308 | 0.6260  | 0    | 60    | 0.00015 | 1    | K.DTFGYDVWPEETAK.N <a href="#">6200</a>                      |
| <a href="#">11873</a> | 764.8132 | 2291.4177 | 2292.0409 | -0.6232 | 1    | 1     | 93      | 9    | R.FVNMKDTFGYDVWPEETAK.N                                      |
| <a href="#">12175</a> | 777.5619 | 2329.6637 | 2327.1169 | 2.5469  | 1    | 3     | 59      | 3    | R.IESNFKSIELTDEDFEAVNK.V                                     |
| <a href="#">13020</a> | 821.2569 | 2460.7487 | 2458.2142 | 2.5345  | 0    | 26    | 0.3     | 1    | K.VWNHLHRPEDVQWSVDNSLK.R                                     |
| <a href="#">14319</a> | 888.0205 | 2661.0397 | 2661.2421 | -0.2024 | 2    | 7     | 21      | 3    | R.FVNMKDTFGYDVWPEETAKNLSA.- <a href="#">14315</a>            |
| <a href="#">14962</a> | 931.9599 | 2792.8577 | 2792.2541 | 0.6037  | 0    | 30    | 0.1     | 1    | R.HLDCAWFYLNEDVGDGIHDFLK.K                                   |

81. [gi|220699951|gb|EED56290.1|](#) Mass: 73462 Score: 319 Queries matched: 26 emPAI: 0.19

Hsp70 chaperone BiP/Kar2, putative [Aspergillus flavus NRRL3357]

| Query                | Observed | Mr(expt)  | Mr(calc)  | Delta  | Miss | Score | Expect  | Rank | Peptide                              |
|----------------------|----------|-----------|-----------|--------|------|-------|---------|------|--------------------------------------|
| <a href="#">802</a>  | 983.4760 | 982.4687  | 982.4607  | 0.0080 | 1    | 3     | 75      | 5    | K.YDDKDVTK.D                         |
| <a href="#">1815</a> | 592.5971 | 1183.1797 | 1181.5823 | 1.5975 | 1    | 3     | 86      | 9    | K.RTLSSQMSTR.I                       |
| <a href="#">2258</a> | 629.5096 | 1257.0047 | 1255.6521 | 1.3527 | 0    | 1     | 1.3e+02 | 10   | K.VEILVNDQGNR.I                      |
| <a href="#">2529</a> | 643.5921 | 1285.1697 | 1284.6350 | 0.5347 | 0    | 53    | 0.00074 | 1    | R.NSLENYAFSLK.N                      |
| <a href="#">2552</a> | 430.1202 | 1287.3387 | 1286.7194 | 0.6193 | 2    | 21    | 1.3     | 2    | K.KNNVDITKDLK.S <a href="#">2545</a> |

|                       |           |           |           |         |   |    |         |    |                                                      |
|-----------------------|-----------|-----------|-----------|---------|---|----|---------|----|------------------------------------------------------|
| <a href="#">2666</a>  | 651.3291  | 1300.6437 | 1300.6009 | 0.0428  | 0 | 2  | 1.1e+02 | 10 | K.FEELNMDLFLK.K                                      |
| <a href="#">3000</a>  | 669.8186  | 1337.6227 | 1336.7027 | 0.9200  | 0 | 77 | 3.2e-06 | 1  | K.VQALLEEFFGGK.K <a href="#">2991</a>                |
| <a href="#">3879</a>  | 718.6546  | 1435.2947 | 1435.7823 | -0.4876 | 2 | 5  |         | 52 | K.DTKNFPFKVVK.D                                      |
| <a href="#">4695</a>  | 764.7051  | 1527.3957 | 1526.7253 | 0.6704  | 0 | 66 | 4.3e-05 | 1  | R.ITPSYVAFTDEER.L <a href="#">4702</a>               |
| <a href="#">5150</a>  | 524.9902  | 1571.9487 | 1573.8312 | -1.8824 | 1 | 6  |         | 37 | K.KSEVDDIVLVGGSTR.I <a href="#">5169</a>             |
| <a href="#">5875</a>  | 817.1796  | 1632.3447 | 1630.8566 | 1.4881  | 0 | 89 | 1.9e-07 | 1  | R.VVNEPTAAAIAYGLDK.T <a href="#">5878</a>            |
| <a href="#">6433</a>  | 837.9236  | 1673.8327 | 1674.9345 | -1.1018 | 1 | 5  |         | 48 | R.IPKVQALLEEFFGGK.K                                  |
| <a href="#">7879</a>  | 601.4069  | 1801.1987 | 1798.8845 | 2.3142  | 1 | 1  | 1e+02   | 7  | K.TFTPEEVSAMVLGKMK.E                                 |
| <a href="#">9817</a>  | 675.2079  | 2022.6017 | 2021.0277 | 1.5741  | 2 | 2  |         | 87 | K.VSADKGTGKAESITITNDK.G                              |
| <a href="#">10665</a> | 1062.5761 | 2123.1377 | 2122.9807 | 0.1570  | 0 | 7  |         | 23 | R.IEIESFHNGEDFSETLTR.A                               |
| <a href="#">10697</a> | 1064.3361 | 2126.6577 | 2125.0799 | 1.5778  | 2 | 1  | 1e+02   | 4  | K.TPKTFTPEEVSAMVLGKMK.E                              |
| <a href="#">12685</a> | 1207.4726 | 2412.9307 | 2410.3220 | 2.6087  | 2 | 1  | 1.1e+02 | 5  | R.SLTKDNNLLGKFEELTSIPPAPR.G                          |
| <a href="#">13059</a> | 822.9962  | 2465.9667 | 2467.1060 | -1.1393 | 1 | 0  | 1.2e+02 | 7  | R.LSQEEIDRMVAEAEFAEEDK.A                             |
| <a href="#">14534</a> | 898.7249  | 2693.1527 | 2693.3660 | -0.2133 | 1 | 1  |         | 94 | R.KSQIFSTAADNQPTVLIQVYEGER.S                         |
| <a href="#">15065</a> | 944.1329  | 2829.3767 | 2827.3472 | 2.0296  | 1 | 3  |         | 51 | K.NQVNDENGLGGQIDEDDKQTILDAVK.E <a href="#">15063</a> |

82. [gi|220691710|gb|EED48058.1|](#) Mass: 52223 Score: 319 Queries matched: 30 emPAI: 0.63

citrate synthase (Cit1), putative [Aspergillus flavus NRRL3357]

| Query                 | Observed  | Mr(expt)  | Mr(calc)  | Delta   | Miss | Score | Expect  | Rank | Peptide                                                                   |
|-----------------------|-----------|-----------|-----------|---------|------|-------|---------|------|---------------------------------------------------------------------------|
| <a href="#">15</a>    | 635.5770  | 634.5697  | 634.3438  | 0.2259  | 0    | 17    | 3.9     | 1    | R.EFALR.K                                                                 |
| <a href="#">394</a>   | 864.4300  | 863.4227  | 863.4865  | -0.0637 | 1    | 9     |         | 21   | K.AYAKGINK.K <a href="#">400</a> <a href="#">405</a>                      |
| <a href="#">1011</a>  | 517.7266  | 1033.4387 | 1033.5444 | -0.1057 | 0    | 47    | 0.0034  | 1    | K.FIEELIDR.C <a href="#">1012</a>                                         |
| <a href="#">1101</a>  | 526.5881  | 1051.1617 | 1050.6185 | 0.5432  | 0    | 35    | 0.053   | 1    | R.ALGAPIERP.K.S                                                           |
| <a href="#">1491</a>  | 561.7806  | 1121.5467 | 1120.6241 | 0.9227  | 0    | 58    | 0.0003  | 1    | K.IAPGVLTEHGK.T <a href="#">1482</a>                                      |
| <a href="#">2271</a>  | 630.0171  | 1258.0197 | 1258.7357 | -0.7160 | 1    | 10    |         | 16   | M.ASSLRIGTSVLR.S                                                          |
| <a href="#">2726</a>  | 654.8531  | 1307.6917 | 1306.7973 | 0.8945  | 0    | 36    | 0.044   | 1    | R.ALGVLPQLIIDR.A <a href="#">2725</a>                                     |
| <a href="#">4130</a>  | 732.2116  | 1462.4087 | 1461.6987 | 0.7100  | 0    | 66    | 3.5e-05 | 1    | K.ETFADNLPGEIEK.V <a href="#">4145</a>                                    |
| <a href="#">4931</a>  | 517.7142  | 1550.1207 | 1547.7944 | 2.3264  | 0    | 5     |         | 46   | K.VIGEVTLDAQYGGAR.G                                                       |
| <a href="#">5029</a>  | 780.5346  | 1559.0547 | 1557.7787 | 1.2760  | 1    | 4     |         | 58   | R.DLSAEWAARSIDLPK.F                                                       |
| <a href="#">5178</a>  | 525.8079  | 1574.4017 | 1573.8351 | 0.5666  | 1    | 17    |         | 3    | R.SDLPKFIEELIDR.C                                                         |
| <a href="#">5186</a>  | 789.2366  | 1576.4587 | 1573.8134 | 2.6454  | 1    | 5     |         | 53   | K.MKAAIGNDLSDAQIK.D                                                       |
| <a href="#">8013</a>  | 908.1831  | 1814.3517 | 1811.8764 | 2.4753  | 0    | 0     | 1.3e+02 | 10   | K.LPDDQMFNLVSQVYK.I                                                       |
| <a href="#">8314</a>  | 925.1961  | 1848.3777 | 1847.8724 | 0.5054  | 0    | 3     |         | 64   | K.CLVWEGSVLDSEEGIR.F                                                      |
| <a href="#">12718</a> | 806.5669  | 2416.6787 | 2415.2335 | 1.4452  | 0    | 43    | 0.0066  | 1    | K.DYLWSTLNAGQVVPYGHAVLR.K <a href="#">12742</a>                           |
| <a href="#">13784</a> | 853.8102  | 2558.4087 | 2556.3046 | 2.1041  | 2    | 2     |         | 70   | R.EFALRKLPPDDQMFNLVSQVYK.I                                                |
| <a href="#">15112</a> | 949.1819  | 2844.5237 | 2842.3782 | 2.1455  | 0    | 61    | 7.5e-05 | 1    | R.CPSTLHPMAQFSLAVTALEHESAFK.A <a href="#">15107</a> <a href="#">15111</a> |
| <a href="#">15357</a> | 985.5489  | 2953.6247 | 2952.3348 | 1.2899  | 1    | 30    | 0.11    | 1    | K.DKDYSYNLANQLGFGNNDFVELMR.L <a href="#">15358</a>                        |
| <a href="#">15549</a> | 1015.2145 | 3042.6217 | 3042.5848 | 0.0369  | 2    | 2     |         | 62   | R.KLPDDQMFNLVSQVYKIAPGVLTEHGK.T                                           |
| <a href="#">16125</a> | 1106.5435 | 3316.6087 | 3317.8242 | -1.2154 | 2    | 1     |         | 73   | -_MASSLRIGTSVLRSTSLAGKPVVQSVAFNGLR.C                                      |

83. [gi|220688664|gb|EED45016.1|](#) **Mass:** 17990 **Score:** 313 **Queries matched:** 22 **emPAI:** 1.81

ribosomal protein S13p/S18e [Aspergillus flavus NRRL3357]

| Query                | Observed | Mr(expt)  | Mr(calc)  | Delta   | Miss | Score | Expect  | Rank | Peptide                                                                        |
|----------------------|----------|-----------|-----------|---------|------|-------|---------|------|--------------------------------------------------------------------------------|
| <a href="#">752</a>  | 487.5151 | 973.0157  | 972.5240  | 0.4917  | 0    | 29    | 0.24    | 1    | R.LLNTNVDGK.Q                                                                  |
| <a href="#">924</a>  | 506.0671 | 1010.1197 | 1010.5219 | -0.4022 | 1    | 10    | 14      | 1    | R.YSNLVCKK.A                                                                   |
| <a href="#">1070</a> | 524.1476 | 1046.2807 | 1045.5709 | 0.7098  | 0    | 40    | 0.018   | 1    | K.IPTWFLNR.Q <a href="#">1069</a> <a href="#">1088</a>                         |
| <a href="#">1116</a> | 527.8051 | 1053.5957 | 1053.5607 | 0.0350  | 0    | 55    | 0.00047 | 1    | K.TNFQYILR.L <a href="#">1128</a>                                              |
| <a href="#">1256</a> | 541.2201 | 1080.4257 | 1079.6049 | 0.8208  | 0    | 45    | 0.0045  | 1    | K.IMYALTQIK.G <a href="#">1252</a>                                             |
| <a href="#">1337</a> | 548.5571 | 1095.0997 | 1095.5998 | -0.5001 | 0    | (19)  | 1.9     | 2    | K.IMYALTQIK.G <a href="#">1346</a>                                             |
| <a href="#">2192</a> | 624.6611 | 1247.3077 | 1246.6041 | 0.7036  | 0    | 79    | 2.2e-06 | 1    | R.AGELTTEELER.V <a href="#">2190</a>                                           |
| <a href="#">2706</a> | 653.5566 | 1305.0987 | 1304.6208 | 0.4779  | 0    | 61    | 0.00013 | 1    | K.DSQVVSNNLDSK.M                                                               |
| <a href="#">3635</a> | 702.6976 | 1403.3807 | 1402.7820 | 0.5987  | 0    | 65    | 4.5e-05 | 1    | R.VVTILQNPQYK.I <a href="#">3625</a> <a href="#">3647</a> <a href="#">3648</a> |
| <a href="#">4145</a> | 732.6266 | 1463.2387 | 1464.8123 | -1.5735 | 1    | 9     | 21      | 3    | K.IMYALTQIKGVGR.R                                                              |
| <a href="#">5370</a> | 531.6992 | 1592.0757 | 1591.7624 | 0.3133  | 1    | 1     | 1.1e+02 | 10   | K.DSQVVSNNLDSKMR.E                                                             |
| <a href="#">6852</a> | 852.5691 | 1703.1237 | 1704.9709 | -1.8471 | 2    | 1     | 1.1e+02 | 7    | K.QKIMYALTQIKGVGR.R                                                            |
| <a href="#">9118</a> | 646.0682 | 1935.1827 | 1933.9229 | 1.2598  | 1    | 15    | 4.5     | 1    | R.DITDGKDSQVVSNNLDSK.M                                                         |

84. [gi|220692772|gb|EED49118.1|](#) **Mass:** 23739 **Score:** 301 **Queries matched:** 10 **emPAI:** 0.14

peptidyl-prolyl cis-trans isomerase [Aspergillus flavus NRRL3357]

| Query                 | Observed | Mr(expt)  | Mr(calc)  | Delta  | Miss | Score | Expect  | Rank | Peptide                                                                              |
|-----------------------|----------|-----------|-----------|--------|------|-------|---------|------|--------------------------------------------------------------------------------------|
| <a href="#">2798</a>  | 659.1081 | 1316.2017 | 1315.6732 | 0.5286 | 0    | 26    | 0.43    | 1    | K.EIEALGSNSGALR.S                                                                    |
| <a href="#">5468</a>  | 801.4106 | 1600.8067 | 1600.7773 | 0.0294 | 0    | 107   | 2.8e-09 | 1    | K.AFFDVEYAPVGTSK.K <a href="#">5466</a> <a href="#">5494</a> <a href="#">5509</a>    |
| <a href="#">8291</a>  | 924.1726 | 1846.3307 | 1845.8931 | 0.4376 | 0    | 12    | 8.1     | 1    | K.HVVFGEVADAESMNVVK.E <a href="#">8295</a> <a href="#">8299</a> <a href="#">8305</a> |
| <a href="#">15023</a> | 940.0735 | 2817.1987 | 2815.3963 | 1.8024 | 2    | 1     | 93      | 6    | R.VIPSFMLQGGDFTRGNGTGGKSIYGEK.F                                                      |

85. [gi|45477378|gb|AY371490.1|\\_e](#) **Mass:** 2992512 **Score:** 300 **Queries matched:** 306 **emPAI:** 0.01

Aspergillus parasiticus aflatoxin pathway gene cluster, complete sequence

| Query               | Observed | Mr(expt) | Mr(calc) | Delta   | Miss | Score | Expect | Rank | Peptide                         |
|---------------------|----------|----------|----------|---------|------|-------|--------|------|---------------------------------|
| <a href="#">24</a>  | 649.5510 | 648.5437 | 648.3265 | 0.2172  | 0    | 14    | 6.9    | 2    | R.QMVQK.Y <a href="#">25</a>    |
| <a href="#">53</a>  | 683.3690 | 682.3617 | 682.4126 | -0.0509 | 0    | 5     | 29     | 9    | K.GLGPLAR.E                     |
| <a href="#">73</a>  | 690.5590 | 689.5517 | 689.4007 | 0.1511  | 1    | 13    | 10     | 4    | R.MRLVR.V <a href="#">72</a>    |
| <a href="#">79</a>  | 694.5290 | 693.5217 | 694.4166 | -0.8949 | 0    | 21    | 1.1    | 6    | R.FLLFR.Y                       |
| <a href="#">121</a> | 733.1260 | 732.1187 | 731.4177 | 0.7010  | 1    | 11    | 17     | 3    | R.QTEKVK.Q                      |
| <a href="#">136</a> | 744.0140 | 743.0067 | 742.3722 | 0.6345  | 0    | 8     | 32     | 8    | R.SSHISGR.N                     |
| <a href="#">153</a> | 754.4440 | 753.4367 | 753.3228 | 0.1139  | 0    | 2     | 80     | 10   | R.QCQYR.L                       |
| <a href="#">179</a> | 385.0241 | 768.0337 | 766.3836 | 1.6501  | 0    | 16    | 2.7    | 3    | K.GWMFVK.R                      |
| <a href="#">223</a> | 790.7660 | 789.7587 | 789.4232 | 0.3355  | 2    | 5     | 63     | 6    | K.EEKKEK.A                      |
| <a href="#">245</a> | 807.6060 | 806.5987 | 806.3956 | 0.2031  | 0    | 11    | 14     | 6    | K.IEASTMR.R <a href="#">243</a> |
| <a href="#">266</a> | 817.4680 | 816.4607 | 816.4355 | 0.0253  | 1    | 8     | 35     | 3    | R.RGQPGFR.L                     |
| <a href="#">278</a> | 412.8446 | 823.6747 | 823.4300 | 0.2447  | 0    | 3     | 63     | 7    | R.HSQSIPR.Y                     |

|                      |                  |                  |                  |                |          |           |                |           |                                                            |
|----------------------|------------------|------------------|------------------|----------------|----------|-----------|----------------|-----------|------------------------------------------------------------|
| <a href="#">319</a>  | <b>421.8941</b>  | <b>841.7737</b>  | <b>841.5022</b>  | <b>0.2716</b>  | <b>0</b> | <b>12</b> | <b>9.1</b>     | <b>7</b>  | <b>R.AVVLGEVR.K</b> <a href="#">333</a>                    |
| <a href="#">360</a>  | 428.7006         | 855.3867         | 855.4562         | -0.0695        | 0        | 16        | 3.7            | 2         | R.IDARPER.F                                                |
| <a href="#">401</a>  | 432.8291         | 863.6437         | 863.4535         | 0.1902         | 1        | 12        | 10             | 3         | R.LDTTRMK.D                                                |
| <a href="#">404</a>  | <b>865.5240</b>  | <b>864.5167</b>  | <b>863.5089</b>  | <b>1.0078</b>  | <b>2</b> | <b>6</b>  | <b>44</b>      | <b>6</b>  | <b>R.YRRLTR.E</b>                                          |
| <a href="#">427</a>  | <b>437.7026</b>  | <b>873.3907</b>  | <b>873.5185</b>  | <b>-0.1277</b> | <b>1</b> | <b>17</b> | <b>3.7</b>     | <b>4</b>  | <b>R.VIRSFPR.T</b>                                         |
| <a href="#">442</a>  | <b>440.0271</b>  | <b>878.0397</b>  | <b>877.4691</b>  | <b>0.5706</b>  | <b>1</b> | <b>15</b> | <b>6</b>       | <b>9</b>  | <b>R.MKETTLR.A</b> <a href="#">439</a> <a href="#">441</a> |
| <a href="#">496</a>  | 450.3536         | 898.6927         | 899.5328         | -0.8400        | 0        | 10        | 15             | 4         | R.LLVDLEAK.D <a href="#">495</a>                           |
| <a href="#">517</a>  | <b>907.4730</b>  | <b>906.4657</b>  | <b>907.3640</b>  | <b>-0.8983</b> | <b>0</b> | <b>11</b> | <b>13</b>      | <b>7</b>  | <b>R.DLNCCAR.R</b> <a href="#">521</a> <a href="#">523</a> |
| <a href="#">529</a>  | 455.3336         | 908.6527         | 908.4940         | 0.1587         | 1        | 15        | 4.2            | 5         | R.LPRSGHSR.S <a href="#">531</a>                           |
| <a href="#">540</a>  | 911.6840         | 910.6767         | 910.5236         | 0.1531         | 0        | 3         | 66             | 10        | K.GGQVGVAPK.Y                                              |
| <a href="#">585</a>  | <b>921.4650</b>  | <b>920.4577</b>  | <b>920.5304</b>  | <b>-0.0727</b> | <b>2</b> | <b>12</b> | <b>11</b>      | <b>1</b>  | <b>R.FSIRSRR.R</b> <a href="#">584</a>                     |
| <a href="#">617</a>  | <b>933.4870</b>  | <b>932.4797</b>  | <b>932.4352</b>  | <b>0.0446</b>  | <b>1</b> | <b>14</b> | <b>7.9</b>     | <b>9</b>  | <b>R.ERDWAEK.S</b> <a href="#">616</a>                     |
| <a href="#">624</a>  | 468.5576         | 935.1007         | 933.5144         | 1.5863         | 2        | 14        | 6.4            | 7         | R.FGAERRAK.J                                               |
| <a href="#">635</a>  | <b>472.0851</b>  | <b>942.1557</b>  | <b>941.4355</b>  | <b>0.7202</b>  | <b>0</b> | <b>9</b>  | <b>21</b>      | <b>3</b>  | <b>R.SFNGFGASR.F</b>                                       |
| <a href="#">691</a>  | 481.0391         | 960.0637         | 959.5260         | 0.5377         | 2        | 17        | 3.9            | 8         | R.RSLGERSR.R                                               |
| <a href="#">843</a>  | <b>495.6116</b>  | <b>989.2087</b>  | <b>988.5706</b>  | <b>0.6382</b>  | <b>0</b> | <b>59</b> | <b>0.00023</b> | <b>1</b>  | <b>K.VGIDLGIFR.S</b> <a href="#">842</a>                   |
| <a href="#">861</a>  | 497.9031         | 993.7917         | 991.4254         | 2.3664         | 1        | 7         | 28             | 9         | K.RSDGNCGAR.A                                              |
| <a href="#">876</a>  | <b>500.1451</b>  | <b>998.2757</b>  | <b>997.5669</b>  | <b>0.7089</b>  | <b>1</b> | <b>6</b>  | <b>39</b>      | <b>2</b>  | <b>R.TPALGDRIR.J</b>                                       |
| <a href="#">948</a>  | 1017.2320        | 1016.2247        | 1016.5549        | -0.3302        | 1        | 6         | 48             | 6         | K.SCGVRLGR.S                                               |
| <a href="#">1005</a> | <b>517.1206</b>  | <b>1032.2267</b> | <b>1031.5472</b> | <b>0.6795</b>  | <b>1</b> | <b>12</b> | <b>11</b>      | <b>10</b> | <b>K.ISGRAASQSR.W</b>                                      |
| <a href="#">1007</a> | <b>517.2626</b>  | <b>1032.5107</b> | <b>1033.5669</b> | <b>-1.0561</b> | <b>1</b> | <b>17</b> | <b>3.6</b>     | <b>1</b>  | <b>R.SSLRVGYPR.L</b>                                       |
| <a href="#">1008</a> | 517.4991         | 1032.9837        | 1031.5975        | 1.3862         | 1        | 9         | 24             | 3         | R.SSGLSKVLNK.N                                             |
| <a href="#">1019</a> | <b>518.4771</b>  | <b>1034.9397</b> | <b>1035.5713</b> | <b>-0.6316</b> | <b>0</b> | <b>10</b> | <b>16</b>      | <b>4</b>  | <b>R.FVSQSLSIR.S</b>                                       |
| <a href="#">1084</a> | <b>524.6976</b>  | <b>1047.3807</b> | <b>1048.4396</b> | <b>-1.0589</b> | <b>0</b> | <b>14</b> | <b>8.3</b>     | <b>4</b>  | <b>R.VMDNHFR.L</b>                                         |
| <a href="#">1109</a> | 527.1441         | 1052.2737        | 1051.6753        | 0.5984         | 1        | 6         | 35             | 6         | R.LLLLREAPK.S                                              |
| <a href="#">1231</a> | <b>538.5126</b>  | <b>1075.0107</b> | <b>1074.6033</b> | <b>0.4074</b>  | <b>0</b> | <b>8</b>  | <b>32</b>      | <b>7</b>  | <b>R.ISSSLSTKPR.A</b>                                      |
| <a href="#">1341</a> | 1096.5850        | 1095.5777        | 1095.5897        | -0.0120        | 2        | 1         | 1.3e+02        | 10        | R.TGREKVHNR.A                                              |
| <a href="#">1416</a> | <b>555.6031</b>  | <b>1109.1917</b> | <b>1106.6025</b> | <b>2.5892</b>  | <b>1</b> | <b>12</b> | <b>11</b>      | <b>2</b>  | <b>K.VYLWWRGK.L</b>                                        |
| <a href="#">1446</a> | <b>1116.4860</b> | <b>1115.4787</b> | <b>1112.6189</b> | <b>2.8598</b>  | <b>0</b> | <b>4</b>  | <b>76</b>      | <b>9</b>  | <b>R.QIISLSPAER.D</b>                                      |
| <a href="#">1508</a> | 563.5961         | 1125.1777        | 1124.5727        | 0.6051         | 1        | 7         | 33             | 3         | R.SALSYSRR.Q                                               |
| <a href="#">1511</a> | <b>564.1706</b>  | <b>1126.3267</b> | <b>1127.6775</b> | <b>-1.3508</b> | <b>1</b> | <b>27</b> | <b>0.32</b>    | <b>1</b>  | <b>R.STRVGGILIGR.N</b> <a href="#">1528</a>                |
| <a href="#">1519</a> | 564.7101         | 1127.4057        | 1128.4805        | -1.0747        | 0        | 3         | 86             | 4         | R.GTMHHDLMR.F                                              |
| <a href="#">1550</a> | <b>566.3611</b>  | <b>1130.7077</b> | <b>1128.6437</b> | <b>2.0640</b>  | <b>1</b> | <b>2</b>  | <b>1.3e+02</b> | <b>3</b>  | <b>K.MRAVVLGEVR.K</b>                                      |
| <a href="#">1672</a> | 577.2411         | 1152.4677        | 1150.5730        | 1.8947         | 1        | 5         | 43             | 3         | R.GRYAELESAR.Q                                             |
| <a href="#">1694</a> | <b>580.3311</b>  | <b>1158.6477</b> | <b>1156.6829</b> | <b>1.9648</b>  | <b>1</b> | <b>4</b>  | <b>69</b>      | <b>4</b>  | <b>K.LKNPARPPHK.J</b>                                      |
| <a href="#">1716</a> | 582.6291         | 1163.2437        | 1162.5625        | 0.6812         | 2        | 10        | 16             | 2         | R.DMGGTQRRSR.V <a href="#">1717</a>                        |
| <a href="#">1816</a> | 592.6776         | 1183.3407        | 1182.5265        | 0.8142         | 0        | 4         | 58             | 8         | R.AVQAEDEHER.F <a href="#">1818</a>                        |
| <a href="#">1858</a> | <b>596.2056</b>  | <b>1190.3967</b> | <b>1189.6568</b> | <b>0.7400</b>  | <b>1</b> | <b>13</b> | <b>7.9</b>     | <b>1</b>  | <b>R.SSLVTRFQPR.Y</b> <a href="#">1854</a>                 |
| <a href="#">1946</a> | <b>606.3316</b>  | <b>1210.6487</b> | <b>1211.7350</b> | <b>-1.0862</b> | <b>1</b> | <b>6</b>  | <b>35</b>      | <b>5</b>  | <b>R.VQSLANLLAKR.L</b>                                     |
| <a href="#">2034</a> | 613.7251         | 1225.4357        | 1223.6622        | 1.7735         | 2        | 9         | 19             | 2         | K.SLRRSVSEYK.T                                             |
| <a href="#">2042</a> | 614.1741         | 1226.3337        | 1226.7248        | -0.3911        | 1        | 12        | 9.5            | 8         | R.VRQTWGVLLR.H                                             |



|                      |                 |                  |                  |                |          |           |                |           |                            |                                           |
|----------------------|-----------------|------------------|------------------|----------------|----------|-----------|----------------|-----------|----------------------------|-------------------------------------------|
| <a href="#">2094</a> | 618.5981        | 1235.1817        | 1233.6731        | 1.5087         | 2        | 8         | 24             | 9         | R.GYDLWRLRR.R              | <a href="#">2099</a>                      |
| <a href="#">2097</a> | <b>412.8445</b> | <b>1235.5117</b> | <b>1233.6136</b> | <b>1.8982</b>  | <b>1</b> | <b>4</b>  | <b>64</b>      | <b>5</b>  | <b>R.ARSTTDMAPLR.A</b>     | <a href="#">2101</a>                      |
| <a href="#">2153</a> | <b>622.7621</b> | <b>1243.5097</b> | <b>1240.6169</b> | <b>2.8929</b>  | <b>2</b> | <b>3</b>  | <b>88</b>      | <b>1</b>  | <b>R.RCRGMLASFK.A</b>      |                                           |
| <a href="#">2188</a> | 416.7429        | 1247.2067        | 1247.6696        | -0.4629        | 0        | 8         | 25             | 3         | R.NTIPVALSFMR.T            | <a href="#">2185</a> <a href="#">2214</a> |
| <a href="#">2215</a> | <b>626.0501</b> | <b>1250.0857</b> | <b>1250.6367</b> | <b>-0.5510</b> | <b>1</b> | <b>2</b>  | <b>95</b>      | <b>7</b>  | <b>R.GRNEYVSVTAR.D</b>     |                                           |
| <a href="#">2317</a> | 632.5626        | 1263.1107        | 1262.6619        | 0.4488         | 0        | 13        | 7.9            | 2         | R.DSGFGLQSIAR.J            | <a href="#">2322</a>                      |
| <a href="#">2363</a> | 634.6761        | 1267.3377        | 1267.5833        | -0.2456        | 0        | 7         | 31             | 7         | R.FDGAGGSGNYPVK.G          |                                           |
| <a href="#">2391</a> | <b>636.6221</b> | <b>1271.2297</b> | <b>1270.6742</b> | <b>0.5555</b>  | <b>1</b> | <b>3</b>  | <b>87</b>      | <b>3</b>  | <b>R.QRAAGDQGSILR.G</b>    |                                           |
| <a href="#">2479</a> | <b>640.4186</b> | <b>1278.8227</b> | <b>1277.6854</b> | <b>1.1374</b>  | <b>2</b> | <b>4</b>  | <b>71</b>      | <b>3</b>  | <b>R.HSVRRQWGPR.V</b>      |                                           |
| <a href="#">2516</a> | <b>428.9402</b> | <b>1283.7987</b> | <b>1282.6122</b> | <b>1.1866</b>  | <b>2</b> | <b>14</b> | <b>6.5</b>     | <b>1</b>  | <b>R.VSDMKRMASSR.A</b>     |                                           |
| <a href="#">2653</a> | <b>650.3691</b> | <b>1298.7237</b> | <b>1297.5761</b> | <b>1.1476</b>  | <b>0</b> | <b>3</b>  | <b>86</b>      | <b>6</b>  | <b>R.YVPSFCPASDR.S</b>     |                                           |
| <a href="#">2669</a> | <b>651.4571</b> | <b>1300.8997</b> | <b>1300.6445</b> | <b>0.2552</b>  | <b>1</b> | <b>1</b>  | <b>1.2e+02</b> | <b>8</b>  | <b>R.EPPLVSCSKER.S</b>     |                                           |
| <a href="#">2697</a> | 652.7286        | 1303.4427        | 1303.6051        | -0.1624        | 1        | 8         | 29             | 8         | K.GAGNTGPATRCR.R           |                                           |
| <a href="#">2723</a> | 654.6866        | 1307.3587        | 1306.7218        | 0.6369         | 2        | 14        | 6.1            | 2         | R.SSPTHRRLTPR.V            | <a href="#">2733</a>                      |
| <a href="#">2756</a> | <b>438.1199</b> | <b>1311.3377</b> | <b>1311.7147</b> | <b>-0.3769</b> | <b>0</b> | <b>13</b> | <b>8.5</b>     | <b>6</b>  | <b>R.IGQGTINPSLQGK.L</b>   |                                           |
| <a href="#">2984</a> | <b>669.1121</b> | <b>1336.2097</b> | <b>1335.7003</b> | <b>0.5095</b>  | <b>1</b> | <b>3</b>  | <b>79</b>      | <b>3</b>  | <b>R.LAKGTICAMVTR.A</b>    |                                           |
| <a href="#">2991</a> | 669.2516        | 1336.4887        | 1335.7986        | 0.6901         | 1        | 8         | 26             | 4         | K.NLKSVVAISHVLR.S          |                                           |
| <a href="#">3006</a> | <b>447.2352</b> | <b>1338.6837</b> | <b>1337.5531</b> | <b>1.1306</b>  | <b>0</b> | <b>6</b>  | <b>40</b>      | <b>10</b> | <b>K.HDDACGSIGNHR.Q</b>    |                                           |
| <a href="#">3024</a> | 671.2081        | 1340.4017        | 1337.7053        | 2.6964         | 0        | 7         | 33             | 6         | K.LLGWSLFMIDK.L            |                                           |
| <a href="#">3154</a> | <b>678.0416</b> | <b>1354.0687</b> | <b>1353.7881</b> | <b>0.2807</b>  | <b>1</b> | <b>1</b>  | <b>1.1e+02</b> | <b>9</b>  | <b>K.LALESLFHRIR.S</b>     |                                           |
| <a href="#">3188</a> | 679.8726        | 1357.7307        | 1355.7383        | 1.9924         | 2        | 4         | 67             | 7         | K.RELYMFIKTR.G             |                                           |
| <a href="#">3303</a> | <b>457.0392</b> | <b>1368.0957</b> | <b>1365.6567</b> | <b>2.4390</b>  | <b>0</b> | <b>9</b>  | <b>18</b>      | <b>10</b> | <b>K.LCLCSLMAGGLR.S</b>    | <a href="#">3291</a>                      |
| <a href="#">3374</a> | <b>688.2076</b> | <b>1374.4007</b> | <b>1373.7415</b> | <b>0.6592</b>  | <b>1</b> | <b>9</b>  | <b>23</b>      | <b>2</b>  | <b>R.ATLAASSNAWRVK.S</b>   |                                           |
| <a href="#">3379</a> | <b>688.3016</b> | <b>1374.5887</b> | <b>1373.7626</b> | <b>0.8261</b>  | <b>2</b> | <b>5</b>  | <b>51</b>      | <b>9</b>  | <b>R.ITTSPSERLRK.S</b>     |                                           |
| <a href="#">3439</a> | <b>461.4752</b> | <b>1381.4037</b> | <b>1379.8725</b> | <b>1.5313</b>  | <b>2</b> | <b>7</b>  | <b>30</b>      | <b>4</b>  | <b>K.IVGNIAAARKVIR.L</b>   |                                           |
| <a href="#">3509</a> | <b>464.0979</b> | <b>1389.2717</b> | <b>1388.7446</b> | <b>0.5272</b>  | <b>1</b> | <b>7</b>  | <b>35</b>      | <b>6</b>  | <b>R.LLGRSDINVAMGK.I</b>   | <a href="#">3500</a>                      |
| <a href="#">3569</a> | <b>466.3235</b> | <b>1395.9487</b> | <b>1395.6929</b> | <b>0.2559</b>  | <b>1</b> | <b>7</b>  | <b>30</b>      | <b>10</b> | <b>R.LEMLEGHGGRGPK.V</b>   |                                           |
| <a href="#">3573</a> | <b>699.1626</b> | <b>1396.3107</b> | <b>1396.8011</b> | <b>-0.4904</b> | <b>2</b> | <b>3</b>  | <b>79</b>      | <b>1</b>  | <b>R.KPIVNNGRTSRR.S</b>    |                                           |
| <a href="#">3634</a> | <b>702.6811</b> | <b>1403.3477</b> | <b>1402.7456</b> | <b>0.6021</b>  | <b>0</b> | <b>2</b>  | <b>1e+02</b>   | <b>10</b> | <b>K.LLQAFPDLRTR.R</b>     |                                           |
| <a href="#">3671</a> | 705.7686        | 1409.5227        | 1406.6646        | 2.8581         | 0        | 1         | 1.2e+02        | 7         | K.MGPIQCSASTLSR.W          |                                           |
| <a href="#">3675</a> | 471.0512        | 1410.1317        | 1407.7068        | 2.4249         | 0        | 5         | 47             | 9         | R.SDLITYAALGCPK.L          |                                           |
| <a href="#">3683</a> | <b>706.8776</b> | <b>1411.7407</b> | <b>1409.6933</b> | <b>2.0475</b>  | <b>0</b> | <b>7</b>  | <b>32</b>      | <b>1</b>  | <b>R.SSMISVTSRPSSR.S</b>   |                                           |
| <a href="#">3709</a> | 708.6731        | 1415.3317        | 1415.6542        | -0.3225        | 0        | 2         | 93             | 10        | K.VSHSSAASGWNGR.M          |                                           |
| <a href="#">3710</a> | <b>708.6931</b> | <b>1415.3717</b> | <b>1414.6729</b> | <b>0.6989</b>  | <b>0</b> | <b>82</b> | <b>9.5e-07</b> | <b>1</b>  | <b>R.SGASFSDFLQQT.K</b>    | <a href="#">3713</a>                      |
| <a href="#">3725</a> | <b>709.2161</b> | <b>1416.4177</b> | <b>1414.7555</b> | <b>1.6622</b>  | <b>0</b> | <b>51</b> | <b>0.0013</b>  | <b>1</b>  | <b>K.ESDTPITLAEIVK.K</b>   | <a href="#">3711</a>                      |
| <a href="#">3768</a> | 712.6971        | 1423.3797        | 1422.7732        | 0.6066         | 2        | 2         | 90             | 9         | R.FLRDRVYIADR.S            |                                           |
| <a href="#">3973</a> | <b>482.5225</b> | <b>1444.5457</b> | <b>1441.6910</b> | <b>2.8547</b>  | <b>0</b> | <b>7</b>  | <b>33</b>      | <b>7</b>  | <b>R.GGHINQITIDSGSTR.R</b> |                                           |
| <a href="#">3994</a> | 724.1981        | 1446.3817        | 1446.6773        | -0.2956        | 0        | 11        | 13             | 2         | K.ATVNVEEEIACGR.Q          |                                           |
| <a href="#">4030</a> | 1450.6890       | 1449.6817        | 1449.7616        | -0.0799        | 1        | 5         | 51             | 6         | K.LYPDRITGYQPK.Q           | <a href="#">4031</a>                      |
| <a href="#">4063</a> | 485.6399        | 1453.8977        | 1452.6966        | 1.2011         | 1        | 3         | 70             | 6         | R.RFASCPNMTVVR.V           |                                           |
| <a href="#">4156</a> | 489.2695        | 1464.7867        | 1465.6481        | -0.8613        | 1        | (2)       | 90             | 2         | R.KHDDACGSIGNHR.Q          | <a href="#">4158</a>                      |

|                      |          |           |           |         |   |     |         |    |                                                              |
|----------------------|----------|-----------|-----------|---------|---|-----|---------|----|--------------------------------------------------------------|
| <a href="#">4195</a> | 736.2816 | 1470.5487 | 1469.6795 | 0.8692  | 1 | 6   | 42      | 4  | R.SWCDKMEVLFR.V <a href="#">4200</a>                         |
| <a href="#">4330</a> | 496.0949 | 1485.2627 | 1482.7905 | 2.4722  | 0 | 6   | 38      | 5  | R.TMIAVLVVFGDYR.A                                            |
| <a href="#">4350</a> | 744.5106 | 1487.0067 | 1485.6745 | 1.3323  | 1 | (2) | 1.1e+02 | 9  | R.SWCDKMEVLFR.V                                              |
| <a href="#">4452</a> | 501.5039 | 1501.4897 | 1498.7854 | 2.7043  | 0 | (2) | 95      | 10 | R.TMIAVLVVFGDYR.A                                            |
| <a href="#">4544</a> | 757.3701 | 1512.7257 | 1512.8637 | -0.1380 | 1 | 6   | 38      | 8  | K.VELAHHVVGQR.LR.H                                           |
| <a href="#">4568</a> | 759.2261 | 1516.4377 | 1517.6966 | -1.2589 | 0 | 4   | 64      | 3  | R.AQMLQSMNTVDHK.L                                            |
| <a href="#">4604</a> | 760.8101 | 1519.6057 | 1517.7910 | 1.8147  | 1 | 1   | 1.3e+02 | 9  | R.TVLSRATQNTASN.R.L                                          |
| <a href="#">4727</a> | 511.4015 | 1531.1827 | 1529.8049 | 1.3778  | 0 | 7   | 33      | 7  | K.SSLTSITSISNPAPR.A                                          |
| <a href="#">4773</a> | 513.0635 | 1536.1687 | 1534.8481 | 1.3207  | 1 | 5   | 44      | 1  | R.RPHIASGRIFEFR.E                                            |
| <a href="#">4896</a> | 773.8356 | 1545.6567 | 1544.8747 | 0.7820  | 2 | 3   | 80      | 2  | R.KLTTRATSTGRPTR.F <a href="#">4866</a> <a href="#">4885</a> |
| <a href="#">4981</a> | 777.9421 | 1553.8697 | 1552.7854 | 1.0843  | 1 | 1   | 1.1e+02 | 5  | R.SAVLLCVRMFGER.D                                            |
| <a href="#">5005</a> | 779.5966 | 1557.1787 | 1556.8935 | 0.2852  | 1 | 8   | 27      | 5  | R.IMTVRWPVLMALK.I                                            |
| <a href="#">5105</a> | 523.5982 | 1567.7727 | 1565.8354 | 1.9373  | 1 | 7   | 31      | 3  | R.SYGWLATKQIFPR.R                                            |
| <a href="#">5165</a> | 525.3512 | 1573.0317 | 1572.8884 | 0.1433  | 1 | (7) | 30      | 4  | R.IMTVRWPVLMALK.I <a href="#">5167</a> <a href="#">5168</a>  |
| <a href="#">5196</a> | 526.7359 | 1577.1857 | 1575.9725 | 1.2132  | 1 | 5   | 49      | 4  | R.LPWSGRPRLLLLL.R.E                                          |
| <a href="#">5202</a> | 527.0482 | 1578.1227 | 1576.8209 | 1.3018  | 1 | 2   | 91      | 5  | K.EIEIEHGGNGAPKVK.V                                          |
| <a href="#">5262</a> | 792.3481 | 1582.6817 | 1582.8184 | -0.1367 | 1 | 9   | 17      | 1  | R.LGGRHLMVCQQR.S                                             |
| <a href="#">5359</a> | 796.2846 | 1590.5547 | 1591.8439 | -1.2892 | 2 | 2   | 95      | 4  | R.VVSIRMGMVSRWR.F                                            |
| <a href="#">5377</a> | 797.2286 | 1592.4427 | 1590.9167 | 1.5260  | 1 | 5   | 53      | 2  | R.QLAYVEMRLILVK.L                                            |
| <a href="#">5393</a> | 798.1816 | 1594.3487 | 1593.7900 | 0.5588  | 1 | 8   | 21      | 5  | R.FDGAGGSGNYPVKGLR.Q                                         |
| <a href="#">5407</a> | 798.8281 | 1595.6417 | 1593.8476 | 1.7941  | 0 | 19  | 2       | 1  | R.SMGIEFLTPYVLPK.E <a href="#">5406</a>                      |
| <a href="#">5457</a> | 534.4892 | 1600.4457 | 1597.6937 | 2.7520  | 1 | 5   | 43      | 4  | R.STGASLDGQMGRCR.H                                           |
| <a href="#">5712</a> | 810.7801 | 1619.5457 | 1618.8315 | 0.7143  | 1 | 4   | 62      | 6  | R.NEYVSVTARDAGIPK.L                                          |
| <a href="#">5762</a> | 812.5691 | 1623.1237 | 1621.9152 | 1.2086  | 1 | 2   | 85      | 4  | K.TTVIRVSPAPTPEVR.L                                          |
| <a href="#">5778</a> | 542.2395 | 1623.6967 | 1621.8763 | 1.8205  | 1 | 5   | 44      | 4  | R.VLLVLACSWRYR.R <a href="#">5731</a>                        |
| <a href="#">5819</a> | 814.7676 | 1627.5207 | 1627.7413 | -0.2206 | 1 | 3   | 74      | 7  | R.MGRFDGAGGSGNYPVK.G                                         |
| <a href="#">5848</a> | 544.3449 | 1630.0127 | 1627.8967 | 2.1160  | 1 | 3   | 68      | 8  | R.GLTVSLPISVDPMKR.L                                          |
| <a href="#">5870</a> | 816.9091 | 1631.8037 | 1632.8002 | -0.9965 | 1 | 7   | 30      | 1  | R.GIGNQRSLNGSEMVR.J <a href="#">5885</a>                     |
| <a href="#">5895</a> | 818.0711 | 1634.1277 | 1633.7929 | 0.3348  | 2 | 0   | 1.4e+02 | 7  | R.QSHRYVLCCQRK.R                                             |
| <a href="#">5914</a> | 546.4202 | 1636.2387 | 1635.7960 | 0.4427  | 0 | 10  | 13      | 5  | R.CSIPLSVDSMTSALR.J                                          |
| <a href="#">6139</a> | 551.7172 | 1652.1297 | 1651.7909 | 0.3388  | 0 | (9) | 19      | 4  | R.CSIPLSVDSMTSALR.J <a href="#">6135</a>                     |
| <a href="#">6251</a> | 554.7192 | 1661.1357 | 1659.7715 | 1.3642  | 1 | 2   | 1e+02   | 8  | R.SERYMIEFFPEGR.V                                            |
| <a href="#">6298</a> | 555.8025 | 1664.3857 | 1662.9167 | 1.4690  | 0 | 6   | 35      | 6  | K.VMASLAFFTSVLHLK.G                                          |
| <a href="#">6363</a> | 557.5849 | 1669.7327 | 1668.7826 | 0.9501  | 0 | 7   | 28      | 5  | R.IMVSCMFWPPLR.S                                             |
| <a href="#">6371</a> | 557.7122 | 1670.1147 | 1671.8944 | -1.7797 | 0 | 2   | 1e+02   | 8  | K.IGSSVPAPGQGILSFSR.E                                        |
| <a href="#">6458</a> | 838.8021 | 1675.5897 | 1673.8883 | 1.7014  | 2 | 1   | 1.1e+02 | 6  | R.SGDRIRTCTTVAIPK.F                                          |
| <a href="#">6628</a> | 563.2692 | 1686.7857 | 1685.8671 | 0.9186  | 0 | 6   | 41      | 2  | R.GPQALLDCAGIRPYR.S                                          |
| <a href="#">6721</a> | 565.6752 | 1694.0037 | 1691.9532 | 2.0506  | 0 | 3   | 67      | 9  | R.LYIVSSMVSIGPSVIK.V                                         |
| <a href="#">6748</a> | 849.2796 | 1696.5447 | 1694.8385 | 1.7063  | 1 | 1   | 1.1e+02 | 6  | R.YRLYPALNCIPCR.D                                            |
| <a href="#">6860</a> | 852.8501 | 1703.6857 | 1702.8798 | 0.8059  | 2 | 1   | 1.2e+02 | 7  | R.RHRQKPPQCQGPSK.G                                           |
| <a href="#">6890</a> | 569.8045 | 1706.3917 | 1705.8094 | 0.5824  | 1 | 5   | 44      | 3  | K.AFLSYSSGGRSSCLK.R                                          |

|                       |                  |                  |                  |                |          |           |                |          |                                               |
|-----------------------|------------------|------------------|------------------|----------------|----------|-----------|----------------|----------|-----------------------------------------------|
| <a href="#">6940</a>  | 856.5921         | 1711.1697        | 1709.8416        | 1.3282         | 0        | 1         | 1.1e+02        | 4        | R.TALVCLCQLGCFIR.Y                            |
| <a href="#">6989</a>  | 858.7501         | 1715.4857        | 1716.8617        | -1.3760        | 2        | 1         | 1.1e+02        | 3        | R.MSDPNWVRQTEKVK.Q                            |
| <a href="#">7003</a>  | 859.3861         | 1716.7577        | 1716.9457        | -0.1880        | 1        | 3         | 65             | 3        | R.QCQYRLINQLILR.F                             |
| <a href="#">7042</a>  | 861.8961         | 1721.7777        | 1722.8182        | -1.0404        | 1        | 2         | 85             | 7        | K.VFSSRASHMQVSPMK.T                           |
| <a href="#">7051</a>  | 862.3606         | 1722.7067        | 1721.7176        | 0.9891         | 1        | 5         | 43             | 3        | R.DGGTAGSGRYHCGEGGK.G                         |
| <a href="#">7086</a>  | <b>863.8401</b>  | <b>1725.6657</b> | <b>1724.8774</b> | <b>0.7883</b>  | <b>0</b> | <b>77</b> | <b>2.8e-06</b> | <b>1</b> | <b>R.QLFLFGDQTADFVPK.L</b>                    |
| <a href="#">7324</a>  | 584.7689         | 1751.2847        | 1749.9751        | 1.3097         | 1        | 2         | 84             | 10       | R.LVLHLGVQGHGHEAR.H                           |
| <a href="#">7462</a>  | 883.5381         | 1765.0617        | 1766.8926        | -1.8309        | 0        | 5         | 47             | 2        | K.TPAPHAASGMLYWPR.S                           |
| <a href="#">7463</a>  | 589.4282         | 1765.2627        | 1762.8611        | 2.4016         | 2        | 5         | 48             | 6        | R.WHRAAAHSASSSPDKR.J                          |
| <a href="#">7548</a>  | 886.8741         | 1771.7337        | 1768.8600        | 2.8737         | 2        | 1         | 1.3e+02        | 8        | R.QYALGMPRGTMKEGSK.L                          |
| <a href="#">7732</a>  | <b>893.8816</b>  | <b>1785.7487</b> | <b>1782.9312</b> | <b>2.8176</b>  | <b>1</b> | <b>3</b>  | <b>78</b>      | <b>1</b> | <b>R.GQHSQVSAIMLRWVR.W</b>                    |
| <a href="#">7810</a>  | 598.9459         | 1793.8157        | 1791.0117        | 2.8040         | 1        | 1         | 1.1e+02        | 9        | R.KVMASLAFFTSVLHLK.G                          |
| <a href="#">7976</a>  | 906.7431         | 1811.4717        | 1810.1040        | 1.3677         | 2        | 2         | 86             | 7        | R.IVSAPLLATKSKRPTTK.C                         |
| <a href="#">8041</a>  | 909.3326         | 1816.6507        | 1817.0206        | -0.3699        | 0        | 4         | 55             | 4        | R.GARPPGMLQLQQLRPR.C <a href="#">8042</a>     |
| <a href="#">8196</a>  | 918.1231         | 1834.2317        | 1834.9036        | -0.6719        | 1        | 3         | 79             | 2        | R.FPVDGGTSTRMWIPAGK.H                         |
| <a href="#">8230</a>  | <b>614.0352</b>  | <b>1839.0837</b> | <b>1840.9328</b> | <b>-1.8491</b> | <b>1</b> | <b>2</b>  | <b>97</b>      | <b>1</b> | <b>R.TCTTVAIPKFCQFIR.V</b>                    |
| <a href="#">8275</a>  | 922.8376         | 1843.6607        | 1842.8465        | 0.8142         | 1        | 7         | 26             | 7        | K.LSNTVTQMNRSCFNR.G                           |
| <a href="#">8525</a>  | 624.2709         | 1869.7907        | 1871.0615        | -1.2708        | 2        | 4         | 63             | 9        | R.SLKESDTPITLAEIVKK.T <a href="#">8516</a>    |
| <a href="#">8575</a>  | 626.1915         | 1875.5527        | 1873.9673        | 1.5854         | 0        | 1         | 1e+02          | 4        | R.VDSSNLSDYPLVVLPEK.T                         |
| <a href="#">8602</a>  | 940.6811         | 1879.3477        | 1878.8499        | 0.4978         | 2        | 0         | 1.4e+02        | 2        | R.GKGMVPDRMDAQVQCR.Q                          |
| <a href="#">8842</a>  | 635.0112         | 1902.0117        | 1903.0468        | -1.0351        | 2        | 2         | 97             | 6        | R.IHFTHEYIIVKVYRK.A                           |
| <a href="#">8854</a>  | 952.4571         | 1902.8997        | 1903.8707        | -0.9710        | 1        | 3         | 79             | 2        | R.NLHPCQTEQHREEAR.Y                           |
| <a href="#">9061</a>  | 964.7031         | 1927.3917        | 1925.9676        | 1.4241         | 2        | 3         | 62             | 4        | R.SGRNLVPMGGIRSCPGPR.L                        |
| <a href="#">9090</a>  | 644.5892         | 1930.7457        | 1932.0581        | -1.3124        | 2        | 1         | 1.1e+02        | 5        | R.WSPLPLSKLTFRSASR.D                          |
| <a href="#">9211</a>  | 650.2899         | 1947.8477        | 1949.0339        | -1.1862        | 1        | 3         | 75             | 4        | R.SPRATAMAAMP RPAPVTK.A                       |
| <a href="#">9260</a>  | <b>651.9639</b>  | <b>1952.8697</b> | <b>1953.0427</b> | <b>-0.1730</b> | <b>2</b> | <b>8</b>  | <b>21</b>      | <b>1</b> | <b>R.VTRMTGLDMETIFAKIK.E</b>                  |
| <a href="#">9265</a>  | 977.7416         | 1953.4687        | 1952.9626        | 0.5062         | 1        | 2         | 77             | 10       | R.TEAGDRAYAAAVMSQAVVK.I <a href="#">9253</a>  |
| <a href="#">9331</a>  | <b>982.3431</b>  | <b>1962.6717</b> | <b>1959.9704</b> | <b>2.7014</b>  | <b>1</b> | <b>2</b>  | <b>81</b>      | <b>1</b> | <b>R.GNAWTWEPGLYLQNR.S</b>                    |
| <a href="#">9398</a>  | 986.2966         | 1970.5787        | 1969.0376        | 1.5411         | 2        | (1)       | 1.1e+02        | 5        | R.VTRMTGLDMETIFAKIK.E                         |
| <a href="#">9778</a>  | 673.6542         | 2017.9407        | 2016.9608        | 0.9799         | 0        | 3         | 76             | 6        | R.DPSNEMIENRPVVMIK.N                          |
| <a href="#">9987</a>  | 680.2079         | 2037.6017        | 2039.1752        | -1.5735        | 2        | 0         | 1.3e+02        | 10       | R.AVGVTATGRVRQTWGVLLR.H                       |
| <a href="#">10124</a> | 684.8855         | 2051.6347        | 2050.9491        | 0.6857         | 2        | 3         | 62             | 4        | K.DKAQDSGGREMFQSPSGVR.T <a href="#">10122</a> |
| <a href="#">10150</a> | 685.9969         | 2054.9687        | 2054.0004        | 0.9684         | 1        | 2         | 80             | 5        | R.MGTRDLYDLVNGFERPR.L <a href="#">10140</a>   |
| <a href="#">10229</a> | 688.3972         | 2062.1697        | 2061.1153        | 1.0544         | 2        | 0         | 1.3e+02        | 8        | R.NCIGRNLAYAEVRLTLAK.L                        |
| <a href="#">10237</a> | 688.6385         | 2062.8937        | 2061.0499        | 1.8438         | 2        | 0         | 1.3e+02        | 8        | R.LPKVFSRASHMQVSPMK.T                         |
| <a href="#">10318</a> | 692.1115         | 2073.3127        | 2071.1724        | 2.1403         | 2        | 3         | 62             | 3        | R.QVPKSI PRVHLPMSLPTR.M                       |
| <a href="#">10379</a> | 1041.3566        | 2080.6987        | 2081.0364        | -0.3377        | 0        | 3         | 58             | 3        | R.HIHLSELGNFIGSSMGGPTK.T                      |
| <a href="#">10437</a> | 697.5029         | 2089.4867        | 2091.0834        | -1.5967        | 1        | 3         | 60             | 7        | R.NNHPRPAKGPININENAGR.E                       |
| <a href="#">10439</a> | <b>697.5925</b>  | <b>2089.7557</b> | <b>2091.1333</b> | <b>-1.3775</b> | <b>1</b> | <b>6</b>  | <b>30</b>      | <b>1</b> | <b>R.APVKIPELPTPAMARPTMR.T</b>                |
| <a href="#">10520</a> | <b>1051.0501</b> | <b>2100.0857</b> | <b>2100.0595</b> | <b>0.0262</b>  | <b>0</b> | <b>36</b> | <b>0.032</b>   | <b>1</b> | <b>R.IILDEMIMPDLAQSQR.F</b>                   |
| <a href="#">10747</a> | 1068.3386        | 2134.6627        | 2133.0974        | 1.5653         | 2        | 1         | 97             | 8        | R.GLRAPGDNVQCLHLQSRGR.F <a href="#">10744</a> |

|                       |                 |                  |                  |                |          |           |                |           |                                                                                  |
|-----------------------|-----------------|------------------|------------------|----------------|----------|-----------|----------------|-----------|----------------------------------------------------------------------------------|
| <a href="#">10814</a> | <b>715.2352</b> | <b>2142.6837</b> | <b>2140.0657</b> | <b>2.6181</b>  | <b>1</b> | <b>2</b>  | <b>79</b>      | <b>1</b>  | <b>R.FMNQIDMTVVLTNLNGKER.S</b>                                                   |
| <a href="#">10828</a> | 1073.3201       | 2144.6257        | 2145.0315        | -0.4058        | 1        | 1         | 99             | 7         | K.LCLCSLMAGGLRSPTPPCR.A                                                          |
| <a href="#">11058</a> | <b>725.7855</b> | <b>2174.3347</b> | <b>2174.1776</b> | <b>0.1571</b>  | <b>1</b> | <b>0</b>  | <b>1.3e+02</b> | <b>10</b> | <b>R.LTLAKLLWHFDFTLDVDK.T</b>                                                    |
| <a href="#">11118</a> | <b>729.1789</b> | <b>2184.5147</b> | <b>2184.1109</b> | <b>0.4038</b>  | <b>1</b> | <b>2</b>  | <b>78</b>      | <b>5</b>  | <b>R.KTAEILQASAYICGAAQHPR.K</b>                                                  |
| <a href="#">11267</a> | <b>734.8899</b> | <b>2201.6477</b> | <b>2199.0711</b> | <b>2.5766</b>  | <b>2</b> | <b>1</b>  | <b>1.1e+02</b> | <b>8</b>  | <b>R.MIKLSNTVTQMNRSCFNR.G</b>                                                    |
| <a href="#">11320</a> | <b>737.9142</b> | <b>2210.7207</b> | <b>2208.1321</b> | <b>2.5886</b>  | <b>2</b> | <b>2</b>  | <b>74</b>      | <b>4</b>  | <b>R.VRTEAGDRAYAAAVMSQAVVK.I</b>                                                 |
| <a href="#">11369</a> | <b>739.2875</b> | <b>2214.8407</b> | <b>2216.1670</b> | <b>-1.3263</b> | <b>1</b> | <b>4</b>  | <b>50</b>      | <b>8</b>  | <b>R.LRGFTTYDIPYLYAIPWK.A <a href="#">11368</a></b>                              |
| <a href="#">11388</a> | <b>740.2889</b> | <b>2217.8447</b> | <b>2219.1568</b> | <b>-1.3121</b> | <b>2</b> | <b>3</b>  | <b>65</b>      | <b>7</b>  | <b>K.IALLRGTMHHDLMRFHQK.Y</b>                                                    |
| <a href="#">11414</a> | <b>741.9132</b> | <b>2222.7177</b> | <b>2223.1834</b> | <b>-0.4657</b> | <b>1</b> | <b>6</b>  | <b>35</b>      | <b>3</b>  | <b>R.VGSGAVGRMIAVLVVFGDYR.A <a href="#">11417</a></b>                            |
| <a href="#">11420</a> | 742.1829        | 2223.5267        | 2222.1518        | 1.3750         | 1        | 4         | 44             | 3         | R.KAPPSTPMIFPLTHSAVSDAR.K                                                        |
| <a href="#">11515</a> | 1119.5021       | 2236.9897        | 2238.1864        | -1.1967        | 1        | 6         | 33             | 4         | R.ATAMAAPMPRPAPVTKATLPSK.R                                                       |
| <a href="#">11784</a> | 761.2552        | 2280.7437        | 2278.2407        | 2.5031         | 2        | 2         | 70             | 4         | K.LQGRHILPTNVPRTAHPSER.L                                                         |
| <a href="#">11835</a> | <b>762.6319</b> | <b>2284.8737</b> | <b>2282.0936</b> | <b>2.7801</b>  | <b>1</b> | <b>4</b>  | <b>45</b>      | <b>6</b>  | <b>R.SINTRAPVAITMHGSCNFYK.F</b>                                                  |
| <a href="#">11889</a> | 765.7875        | 2294.3407        | 2295.1165        | -0.7758        | 0        | 5         | 44             | 4         | R.STGLMTAHDIIAETVEEHGIR.T                                                        |
| <a href="#">11990</a> | <b>769.8089</b> | <b>2306.4047</b> | <b>2307.1807</b> | <b>-0.7760</b> | <b>2</b> | <b>7</b>  | <b>25</b>      | <b>1</b>  | <b>K.GWPALGLGDGHRHQYALGMPR.G</b>                                                 |
| <a href="#">12042</a> | <b>771.6852</b> | <b>2312.0337</b> | <b>2311.2001</b> | <b>0.8336</b>  | <b>2</b> | <b>2</b>  | <b>83</b>      | <b>4</b>  | <b>K.VKQMSAQGRGQHSQVSAIMLR.W</b>                                                 |
| <a href="#">12146</a> | 776.3945        | 2326.1617        | 2324.2616        | 1.9001         | 2        | 4         | 48             | 5         | R.CVIAAIFGPGIFLRGWKYTR.J                                                         |
| <a href="#">12148</a> | 776.5552        | 2326.6437        | 2326.1793        | 0.4644         | 2        | 3         | 69             | 5         | R.SWIVQPMRQAQGFQPKDR.I <a href="#">12157</a>                                     |
| <a href="#">12161</a> | <b>776.9305</b> | <b>2327.7697</b> | <b>2326.2968</b> | <b>1.4729</b>  | <b>2</b> | <b>3</b>  | <b>60</b>      | <b>9</b>  | <b>R.LLLEGGARVLVTTTSREPATTSR.Y <a href="#">12165</a></b>                         |
| <a href="#">12166</a> | <b>777.2345</b> | <b>2328.6817</b> | <b>2330.1478</b> | <b>-1.4660</b> | <b>2</b> | <b>8</b>  | <b>22</b>      | <b>1</b>  | <b>R.FPVDGGTSTRMWIPAGKHETK.G</b>                                                 |
| <a href="#">12178</a> | <b>777.6699</b> | <b>2329.9877</b> | <b>2329.2754</b> | <b>0.7124</b>  | <b>2</b> | <b>1</b>  | <b>91</b>      | <b>4</b>  | <b>R.GASWAVSRSSLILETGKGNVAVK.Q</b>                                               |
| <a href="#">12207</a> | 779.7495        | 2336.2267        | 2337.2614        | -1.0347        | 1        | 4         | 52             | 3         | R.LYIVSSMVSGLGPSVIKVGESTR.F <a href="#">12203</a> <a href="#">12218</a>          |
| <a href="#">12385</a> | <b>790.8889</b> | <b>2369.6447</b> | <b>2367.1875</b> | <b>2.4573</b>  | <b>2</b> | <b>5</b>  | <b>39</b>      | <b>3</b>  | <b>R.HLMVCQQIRSPCWRPQKK.I</b>                                                    |
| <a href="#">12437</a> | 792.6655        | 2374.9747        | 2375.1824        | -0.2077        | 1        | 2         | 79             | 6         | K.SRILLDEMIMPDLAQSQR.F                                                           |
| <a href="#">12492</a> | <b>795.4035</b> | <b>2383.1887</b> | <b>2382.1937</b> | <b>0.9950</b>  | <b>1</b> | <b>5</b>  | <b>39</b>      | <b>1</b>  | <b>R.MYPAVPGQPPRVVPASGATVCGR.F</b>                                               |
| <a href="#">12547</a> | <b>797.6795</b> | <b>2390.0167</b> | <b>2388.3338</b> | <b>1.6830</b>  | <b>0</b> | <b>4</b>  | <b>54</b>      | <b>9</b>  | <b>R.ECEAVIKPTILASSLYIGLIAK.R</b>                                                |
| <a href="#">12571</a> | <b>799.1472</b> | <b>2394.4197</b> | <b>2393.2015</b> | <b>1.2182</b>  | <b>0</b> | <b>44</b> | <b>0.0054</b>  | <b>1</b>  | <b>K.ELIPHLSYFQVEPTEHDLAR.K <a href="#">12572</a></b>                            |
| <a href="#">12626</a> | <b>802.1672</b> | <b>2403.4797</b> | <b>2403.2369</b> | <b>0.2428</b>  | <b>1</b> | <b>2</b>  | <b>86</b>      | <b>9</b>  | <b>R.VVPASGATVCGRFVPEEVFNLR.J</b>                                                |
| <a href="#">12700</a> | <b>805.7462</b> | <b>2414.2167</b> | <b>2413.0816</b> | <b>1.1352</b>  | <b>1</b> | <b>6</b>  | <b>32</b>      | <b>9</b>  | <b>R.SSTQPKTTWAVQGSSENMSSE.R</b>                                                 |
| <a href="#">12704</a> | <b>805.8019</b> | <b>2414.3837</b> | <b>2414.2158</b> | <b>0.1679</b>  | <b>2</b> | <b>1</b>  | <b>87</b>      | <b>8</b>  | <b>R.AQMLQSMNTVDHKLARTADLR.Q</b>                                                 |
| <a href="#">12840</a> | <b>811.7192</b> | <b>2432.1357</b> | <b>2430.2900</b> | <b>1.8457</b>  | <b>2</b> | <b>4</b>  | <b>50</b>      | <b>9</b>  | <b>R.LTAARAAASIDLVAADDIGSVKMSR.A <a href="#">12814</a> <a href="#">12839</a></b> |
| <a href="#">12885</a> | <b>813.4165</b> | <b>2437.2277</b> | <b>2437.2233</b> | <b>0.0045</b>  | <b>0</b> | <b>5</b>  | <b>38</b>      | <b>1</b>  | <b>R.GDIALQMGPLIYAVIASSAMAADK.I</b>                                              |
| <a href="#">12942</a> | <b>816.3345</b> | <b>2445.9817</b> | <b>2444.1642</b> | <b>1.8176</b>  | <b>0</b> | <b>1</b>  | <b>92</b>      | <b>7</b>  | <b>K.GESLPTAIFQAESPACSEAPNLR.V</b>                                               |
| <a href="#">12943</a> | <b>816.3905</b> | <b>2446.1497</b> | <b>2444.2383</b> | <b>1.9114</b>  | <b>2</b> | <b>4</b>  | <b>53</b>      | <b>5</b>  | <b>R.KEPTRTNQVWQLFQLCPGSR.A</b>                                                  |
| <a href="#">12953</a> | <b>817.2342</b> | <b>2448.6807</b> | <b>2448.2882</b> | <b>0.3925</b>  | <b>2</b> | <b>9</b>  | <b>14</b>      | <b>1</b>  | <b>R.ASSLPWKIALLRGTMHHDLMR.F</b>                                                 |
| <a href="#">12956</a> | <b>817.2935</b> | <b>2448.8587</b> | <b>2447.3020</b> | <b>1.5567</b>  | <b>1</b> | <b>9</b>  | <b>15</b>      | <b>3</b>  | <b>R.LDPVVATAVGPEDGNNRIADALLK.R <a href="#">12952</a></b>                        |
| <a href="#">12971</a> | 818.3479        | 2452.0217        | 2450.2931        | 1.7286         | 1        | 1         | 88             | 9         | R.DLEHRPAGVIKWPALGLGDGHR.R                                                       |
| <a href="#">13005</a> | <b>820.6559</b> | <b>2458.9457</b> | <b>2458.2250</b> | <b>0.7207</b>  | <b>2</b> | <b>0</b>  | <b>1e+02</b>   | <b>8</b>  | <b>R.RGVVPPFSCSTYVGWMTQTKVR.E</b>                                                |
| <a href="#">13142</a> | 825.5289        | 2473.5647        | 2474.3555        | -0.7908        | 2        | 4         | 47             | 7         | R.RVPISCFIFARIVFHACLLR.S                                                         |
| <a href="#">13199</a> | <b>827.6962</b> | <b>2480.0667</b> | <b>2479.3416</b> | <b>0.7251</b>  | <b>0</b> | <b>4</b>  | <b>45</b>      | <b>1</b>  | <b>R.AIEHVPLTWVFLAVGGAWIVSK.I</b>                                                |
| <a href="#">13393</a> | 836.5032        | 2506.4877        | 2506.2989        | 0.1889         | 0        | 15        | 3.8            | 3         | R.ISSIFGILESATAGDESPMLLALR.S <a href="#">13390</a>                               |

|                       |                           |                           |                           |                         |   |     |         |   |                                                                                                                     |
|-----------------------|---------------------------|---------------------------|---------------------------|-------------------------|---|-----|---------|---|---------------------------------------------------------------------------------------------------------------------|
| <a href="#">13429</a> | <a href="#">837.7859</a>  | <a href="#">2510.3357</a> | <a href="#">2509.1141</a> | <a href="#">1.2216</a>  | 0 | 5   | 39      | 1 | <a href="#">K.MCLVGGYDDLQEEASYGFAQLK.A</a> <a href="#">13445</a>                                                    |
| <a href="#">13588</a> | <a href="#">844.0282</a>  | <a href="#">2529.0627</a> | <a href="#">2530.3696</a> | <a href="#">-1.3069</a> | 1 | 3   | 62      | 2 | <a href="#">R.LSAGLDAFALPRFDFIALSTHIR.Y</a>                                                                         |
| <a href="#">13710</a> | <a href="#">851.0322</a>  | <a href="#">2550.0747</a> | <a href="#">2551.2748</a> | <a href="#">-1.2000</a> | 1 | 5   | 36      | 3 | <a href="#">K.LLWHFDFTLVDVKTGNFLDQK.I</a> <a href="#">13723</a>                                                     |
| <a href="#">13805</a> | <a href="#">855.1692</a>  | <a href="#">2562.4857</a> | <a href="#">2561.3135</a> | <a href="#">1.1723</a>  | 0 | 12  | 6.7     | 1 | <a href="#">K.MTSFLAPICHSKPSVFTVTPVAR.F</a>                                                                         |
| <a href="#">13818</a> | <a href="#">855.7395</a>  | <a href="#">2564.1967</a> | <a href="#">2561.4516</a> | <a href="#">2.7452</a>  | 2 | 1   | 89      | 3 | <a href="#">R.RESRIFVLLFSPASINVMVIVR.V</a>                                                                          |
| <a href="#">13894</a> | <a href="#">861.3289</a>  | <a href="#">2580.9647</a> | <a href="#">2579.3496</a> | <a href="#">1.6151</a>  | 1 | 2   | 79      | 3 | <a href="#">R.YHIVHDASPRTTILEFPLVESR.S</a>                                                                          |
| <a href="#">13951</a> | <a href="#">864.7872</a>  | <a href="#">2591.3397</a> | <a href="#">2592.4500</a> | <a href="#">-1.1103</a> | 1 | 0   | 1.1e+02 | 7 | <a href="#">R.QSLGQVRTPQLVTVGVYIHLGLSAR.Q</a>                                                                       |
| <a href="#">13987</a> | <a href="#">869.3585</a>  | <a href="#">2605.0537</a> | <a href="#">2603.4006</a> | <a href="#">1.6531</a>  | 1 | 0   | 1.2e+02 | 6 | <a href="#">R.FLSPGTKPTLQAPVAPMHRSSLR.V</a>                                                                         |
| <a href="#">14049</a> | <a href="#">871.3725</a>  | <a href="#">2611.0957</a> | <a href="#">2612.3421</a> | <a href="#">-1.2464</a> | 0 | 2   | 65      | 3 | <a href="#">K.VRPHMSPGGTVGVDLVPLASFDAYK.N</a> <a href="#">14051</a> <a href="#">14058</a>                           |
| <a href="#">14118</a> | <a href="#">876.6785</a>  | <a href="#">2627.0137</a> | <a href="#">2628.3370</a> | <a href="#">-1.3233</a> | 0 | (1) | 93      | 6 | <a href="#">K.VRPHMSPGGTVGVDLVPLASFDAYK.N</a>                                                                       |
| <a href="#">14149</a> | <a href="#">879.6989</a>  | <a href="#">2636.0747</a> | <a href="#">2635.2820</a> | <a href="#">0.7928</a>  | 2 | 1   | 95      | 8 | <a href="#">R.RPKPNTNFMGSVSGGELCRSRN.R</a>                                                                          |
| <a href="#">14154</a> | <a href="#">879.8712</a>  | <a href="#">2636.5917</a> | <a href="#">2637.3432</a> | <a href="#">-0.7515</a> | 2 | 1   | 94      | 4 | <a href="#">R.AAASIDLVAADDIGSVKMSRASELFR.N</a>                                                                      |
| <a href="#">14212</a> | <a href="#">883.3275</a>  | <a href="#">2646.9607</a> | <a href="#">2644.2360</a> | <a href="#">2.7247</a>  | 1 | 4   | 43      | 4 | <a href="#">K.TPVGACATGVESIDSGYESIMAGTK.M</a>                                                                       |
| <a href="#">14265</a> | <a href="#">886.3062</a>  | <a href="#">2655.8967</a> | <a href="#">2656.3795</a> | <a href="#">-0.4828</a> | 2 | 3   | 50      | 2 | <a href="#">K.VYRKAPPSTPMIFPLTHSAVSDAR.K</a>                                                                        |
| <a href="#">14340</a> | <a href="#">889.3575</a>  | <a href="#">2665.0507</a> | <a href="#">2662.4330</a> | <a href="#">2.6177</a>  | 1 | 0   | 99      | 4 | <a href="#">R.LILPAVGPHTTITKDGTEYAEAPR.Q</a>                                                                        |
| <a href="#">14346</a> | <a href="#">889.8422</a>  | <a href="#">2666.5047</a> | <a href="#">2668.2850</a> | <a href="#">-1.7803</a> | 1 | 1   | 92      | 8 | <a href="#">R.VVPCNLASAQDCEGLIRHVYDPR.G</a>                                                                         |
| <a href="#">14910</a> | <a href="#">927.9889</a>  | <a href="#">2780.9447</a> | <a href="#">2782.3279</a> | <a href="#">-1.3832</a> | 2 | 1   | 85      | 3 | <a href="#">K.GETGRSINTRAPVAITMHGSCNFYK.F</a>                                                                       |
| <a href="#">15017</a> | <a href="#">939.0345</a>  | <a href="#">2814.0817</a> | <a href="#">2812.3611</a> | <a href="#">1.7206</a>  | 1 | 0   | 96      | 5 | <a href="#">R.APWSPISVCTCLACFGQRIYVATR.T</a>                                                                        |
| <a href="#">15274</a> | <a href="#">971.8529</a>  | <a href="#">2912.5367</a> | <a href="#">2912.4927</a> | <a href="#">0.0441</a>  | 2 | 2   | 61      | 5 | <a href="#">R.NLDTLDEALRSASHLCFPTRTVQLR.E</a>                                                                       |
| <a href="#">15449</a> | <a href="#">998.6552</a>  | <a href="#">2992.9437</a> | <a href="#">2994.5285</a> | <a href="#">-1.5847</a> | 2 | 0   | 1.1e+02 | 5 | <a href="#">K.HISLDGSRSHRIHGDFLVSAVNGHAANK.G</a>                                                                    |
| <a href="#">15465</a> | <a href="#">1002.4339</a> | <a href="#">3004.2797</a> | <a href="#">3003.2943</a> | <a href="#">0.9854</a>  | 1 | 1   | 77      | 7 | <a href="#">R.TNMDGIMIEGDACVGLAASRTSYCHSR.G</a>                                                                     |
| <a href="#">15510</a> | <a href="#">1011.9422</a> | <a href="#">3032.8047</a> | <a href="#">3030.4245</a> | <a href="#">2.3803</a>  | 0 | 3   | 50      | 3 | <a href="#">R.MSTASLEGTLSMGS LCVPLPFMLTSPCK.W</a> <a href="#">15506</a> <a href="#">15507</a> <a href="#">15512</a> |
| <a href="#">15712</a> | <a href="#">1033.4092</a> | <a href="#">3097.2057</a> | <a href="#">3097.6126</a> | <a href="#">-0.4069</a> | 1 | 3   | 51      | 2 | <a href="#">R.SSSKVAVAIWTFRPMAITMLSDAAML.R.A</a>                                                                    |
| <a href="#">15720</a> | <a href="#">1034.8882</a> | <a href="#">3101.6427</a> | <a href="#">3102.3924</a> | <a href="#">-0.7496</a> | 2 | 0   | 1e+02   | 9 | <a href="#">R.VMDNHFRLLSEFERGFTCQNGASEK.E</a>                                                                       |
| <a href="#">15763</a> | <a href="#">1041.5439</a> | <a href="#">3121.6097</a> | <a href="#">3121.6171</a> | <a href="#">-0.0074</a> | 0 | 0   | 94      | 8 | <a href="#">R.VFPPVPWPWHLDYLETSTQTIQMALQR.L</a>                                                                     |
| <a href="#">15909</a> | <a href="#">1071.2992</a> | <a href="#">3210.8757</a> | <a href="#">3211.5779</a> | <a href="#">-0.7022</a> | 2 | 1   | 80      | 7 | <a href="#">R.DVLLREEGLDDSSSQPMVIVLDSGDRNPR.E</a>                                                                   |
| <a href="#">15979</a> | <a href="#">1085.0352</a> | <a href="#">3252.0837</a> | <a href="#">3249.4706</a> | <a href="#">2.6131</a>  | 0 | 0   | 89      | 6 | <a href="#">R.LASSAAEEYWDNVSSMYAESCGITLRPR.Q</a>                                                                    |

86. [gi|45477378|gb|AY371490.1|\\_b](#) Mass: 2989536 Score: 297 Queries matched: 293 emPAI: 0.01

Aspergillus parasiticus aflatoxin pathway gene cluster, complete sequence

| Query               | Observed | Mr(expt) | Mr(calc) | Delta   | Miss | Score | Expect | Rank | Peptide                      |
|---------------------|----------|----------|----------|---------|------|-------|--------|------|------------------------------|
| <a href="#">23</a>  | 325.0841 | 648.1537 | 647.3351 | 0.8187  | 1    | 13    | 11     | 6    | <a href="#">R.KNSGSR.N</a>   |
| <a href="#">26</a>  | 650.4130 | 649.4057 | 649.3217 | 0.0840  | 0    | 8     | 29     | 2    | <a href="#">R.LSAMGR.D</a>   |
| <a href="#">39</a>  | 672.5100 | 671.5027 | 671.4078 | 0.0949  | 1    | 23    | 0.95   | 6    | <a href="#">R.EVIRR.G</a>    |
| <a href="#">84</a>  | 702.5160 | 701.5087 | 701.3457 | 0.1631  | 0    | 13    | 11     | 3    | <a href="#">R.QGGVGER.R</a>  |
| <a href="#">216</a> | 789.4940 | 788.4867 | 788.4140 | 0.0727  | 1    | 7     | 41     | 10   | <a href="#">R.SNPRSTK.L</a>  |
| <a href="#">314</a> | 421.0041 | 839.9937 | 840.5545 | -0.5608 | 1    | 7     | 28     | 9    | <a href="#">R.VLGVKGLR.I</a> |
| <a href="#">346</a> | 424.8896 | 847.7647 | 848.4538 | -0.6891 | 1    | 7     | 38     | 6    | <a href="#">K.TIRANMK.Q</a>  |
| <a href="#">359</a> | 428.6501 | 855.2857 | 852.4058 | 2.8799  | 2    | 2     | 85     | 10   | <a href="#">R.CMRRSK.I</a>   |
| <a href="#">369</a> | 429.0926 | 856.1707 | 857.5334 | -1.3627 | 0    | 15    | 5.4    | 8    | <a href="#">K.SVISLALR.E</a> |

|                      |           |           |           |         |   |    |         |    |                                                                                 |
|----------------------|-----------|-----------|-----------|---------|---|----|---------|----|---------------------------------------------------------------------------------|
| <a href="#">408</a>  | 867.4640  | 866.4567  | 866.3440  | 0.1128  | 0 | 7  | 30      | 6  | R.ESSEMER.I                                                                     |
| <a href="#">412</a>  | 435.1566  | 868.2987  | 869.5195  | -1.2208 | 2 | 10 | 13      | 2  | R.KNLPRSR.Q                                                                     |
| <a href="#">417</a>  | 436.1891  | 870.3637  | 870.4923  | -0.1286 | 1 | 11 | 14      | 10 | K.KTALGPER.I <a href="#">419</a>                                                |
| <a href="#">497</a>  | 451.0531  | 900.0917  | 899.4899  | 0.6019  | 0 | 21 | 1.6     | 4  | R.GMVDPLLR.S                                                                    |
| <a href="#">558</a>  | 914.5420  | 913.5347  | 913.4981  | 0.0366  | 0 | 4  | 78      | 5  | R.ITSSHLTR.S                                                                    |
| <a href="#">582</a>  | 460.1971  | 918.3797  | 918.4705  | -0.0908 | 1 | 16 | 4.8     | 4  | R.SRMSGPLR.R                                                                    |
| <a href="#">701</a>  | 482.3616  | 962.7087  | 963.5250  | -0.8163 | 2 | 2  | 1e+02   | 7  | R.SAPRSYRK.L                                                                    |
| <a href="#">707</a>  | 965.5100  | 964.5027  | 964.5052  | -0.0024 | 0 | 6  | 45      | 8  | K.WLSMSTLK.C <a href="#">708</a>                                                |
| <a href="#">734</a>  | 969.6090  | 968.6017  | 967.5927  | 1.0091  | 1 | 7  | 31      | 10 | R.NSIPILR.R.T                                                                   |
| <a href="#">744</a>  | 486.3071  | 970.5997  | 969.4992  | 1.1005  | 2 | 6  | 43      | 9  | K.RDDPPSKR.J                                                                    |
| <a href="#">762</a>  | 488.5776  | 975.1407  | 975.5066  | -0.3658 | 0 | 12 | 14      | 8  | R.LFVYGSYK.L <a href="#">766</a>                                                |
| <a href="#">780</a>  | 978.6420  | 977.6347  | 977.4349  | 0.1998  | 1 | 6  | 46      | 8  | R.RQGDDMTR.A                                                                    |
| <a href="#">781</a>  | 489.8611  | 977.7077  | 979.5311  | -1.8234 | 1 | 8  | 27      | 1  | R.SPNIRTHR.S                                                                    |
| <a href="#">792</a>  | 490.7691  | 979.5237  | 978.5471  | 0.9766  | 1 | 7  | 31      | 7  | R.RQALQHR.R                                                                     |
| <a href="#">892</a>  | 501.3986  | 1000.7827 | 1001.5982 | -0.8154 | 1 | 8  | 33      | 7  | K.LRLTSSVAR.A                                                                   |
| <a href="#">913</a>  | 503.6206  | 1005.2267 | 1005.4880 | -0.2612 | 0 | 30 | 0.18    | 1  | R.VLFDDQNR.A                                                                    |
| <a href="#">920</a>  | 505.4151  | 1008.8157 | 1009.4981 | -0.6824 | 0 | 5  | 49      | 1  | R.YTVTYHAR.T                                                                    |
| <a href="#">940</a>  | 508.8236  | 1015.6327 | 1015.5913 | 0.0414  | 1 | 20 | 1.7     | 3  | K.KSLDALLEK.V <a href="#">953</a>                                               |
| <a href="#">948</a>  | 1017.2320 | 1016.2247 | 1015.5159 | 0.7088  | 2 | 9  | 21      | 2  | R.DDRRDLAR.I                                                                    |
| <a href="#">989</a>  | 515.4361  | 1028.8577 | 1029.5971 | -0.7394 | 0 | 8  | 29      | 6  | R.YLAGQLLPR.S                                                                   |
| <a href="#">1025</a> | 518.9821  | 1035.9497 | 1034.5066 | 1.4431  | 0 | 4  | 64      | 6  | R.EIVASDVMR.E                                                                   |
| <a href="#">1071</a> | 524.1581  | 1046.3017 | 1043.5512 | 2.7505  | 0 | 9  | 25      | 7  | K.VVNYAHSR.E                                                                    |
| <a href="#">1092</a> | 525.3256  | 1048.6367 | 1047.4906 | 1.1461  | 0 | 23 | 0.8     | 2  | R.LIDQDMADK.V <a href="#">1091</a>                                              |
| <a href="#">1173</a> | 534.2316  | 1066.4487 | 1065.5243 | 0.9244  | 0 | 2  | 99      | 7  | K.AGTWAASAGFK.E                                                                 |
| <a href="#">1191</a> | 535.2076  | 1068.4007 | 1067.6927 | 0.7080  | 2 | 10 | 16      | 6  | K.ARVLGVKGLR.I                                                                  |
| <a href="#">1232</a> | 539.1326  | 1076.2507 | 1073.5942 | 2.6566  | 1 | 11 | 15      | 1  | R.RTSGVGAGLTR.M <a href="#">1234</a>                                            |
| <a href="#">1362</a> | 551.1976  | 1100.3807 | 1101.6618 | -1.2811 | 2 | 2  | 1.2e+02 | 2  | R.LASVSRVSKR.S <a href="#">1360</a>                                             |
| <a href="#">1571</a> | 378.6832  | 1133.0277 | 1130.6091 | 2.4187  | 2 | 15 | 5.7     | 7  | R.MRLAGQRGSR.H <a href="#">1567</a>                                             |
| <a href="#">1796</a> | 393.6009  | 1177.7807 | 1179.7676 | -1.9869 | 2 | 10 | 18      | 1  | R.RTRPLRLLR.C                                                                   |
| <a href="#">1801</a> | 590.4196  | 1178.8247 | 1177.5397 | 1.2850  | 0 | 9  | 19      | 7  | R.SAPSPTCTTTR.G                                                                 |
| <a href="#">1817</a> | 592.6811  | 1183.3477 | 1183.6132 | -0.2654 | 1 | 7  | 32      | 9  | R.RGTMNLDHIK.S                                                                  |
| <a href="#">1875</a> | 598.6936  | 1195.3727 | 1193.5499 | 1.8228  | 0 | 3  | 83      | 10 | R.AGWGMSLATER.N                                                                 |
| <a href="#">1884</a> | 599.5761  | 1197.1377 | 1196.6335 | 0.5042  | 1 | 3  | 74      | 9  | K.LLSAMYTRSR.K                                                                  |
| <a href="#">1894</a> | 600.2646  | 1198.5147 | 1198.6921 | -0.1774 | 1 | 6  | 43      | 10 | R.IKEDVQLLNK.L                                                                  |
| <a href="#">1932</a> | 604.6996  | 1207.3847 | 1206.6608 | 0.7239  | 0 | 7  | 29      | 6  | R.LFSIISLDGSR.D                                                                 |
| <a href="#">1958</a> | 606.7881  | 1211.5617 | 1210.6418 | 0.9199  | 0 | 16 | 3.8     | 3  | R.AGLSTAAQSLHR.Y <a href="#">1950</a> <a href="#">1952</a> <a href="#">1963</a> |
| <a href="#">1987</a> | 1217.3360 | 1216.3287 | 1216.7040 | -0.3753 | 2 | 5  | 62      | 3  | R.VSKRSLQPPR.L                                                                  |
| <a href="#">2053</a> | 615.2126  | 1228.4107 | 1225.7143 | 2.6965  | 1 | 6  | 43      | 10 | R.AGVELVQKGAVR.S                                                                |
| <a href="#">2134</a> | 621.6521  | 1241.2897 | 1240.5982 | 0.6915  | 2 | 9  | 19      | 3  | R.KMGPODEKHR.R <a href="#">2133</a> <a href="#">2138</a>                        |
| <a href="#">2160</a> | 623.2131  | 1244.4117 | 1244.5819 | -0.1702 | 0 | 3  | 79      | 1  | K.VESHSQLMGNK.E                                                                 |
| <a href="#">2258</a> | 629.5096  | 1257.0047 | 1255.7248 | 1.2799  | 1 | 4  | 73      | 5  | R.LDGKVALVTGAGR.G                                                               |



|                      |           |           |           |         |   |      |         |    |                                                           |
|----------------------|-----------|-----------|-----------|---------|---|------|---------|----|-----------------------------------------------------------|
| <a href="#">2259</a> | 629.5466  | 1257.0787 | 1256.7387 | 0.3400  | 2 | 6    | 42      | 3  | R.RSLRIPQMLK.S                                            |
| <a href="#">2381</a> | 635.7971  | 1269.5797 | 1270.7496 | -1.1699 | 0 | 5    | 49      | 1  | R.ITLLITEQNVK.S                                           |
| <a href="#">2403</a> | 637.2901  | 1272.5657 | 1272.6674 | -0.1017 | 0 | 11   | 14      | 2  | K.GGVEISLQESVR.L                                          |
| <a href="#">2437</a> | 639.0671  | 1276.1197 | 1274.7241 | 1.3956  | 2 | 4    | 66      | 7  | R.SGIISSRRMR.D                                            |
| <a href="#">2438</a> | 639.1011  | 1276.1877 | 1275.6935 | 0.4942  | 0 | 50   | 0.0016  | 1  | K.DHLEQLGIPVR.S <a href="#">2455</a>                      |
| <a href="#">2493</a> | 641.2681  | 1280.5217 | 1278.7673 | 1.7544  | 2 | 6    | 36      | 5  | R.LWVPPISRRR.T                                            |
| <a href="#">2497</a> | 641.9446  | 1281.8747 | 1281.6929 | 0.1819  | 0 | 0    | 1.4e+02 | 6  | K.VPSSEAVDILPR.Y                                          |
| <a href="#">2514</a> | 642.7886  | 1283.5627 | 1282.6414 | 0.9214  | 0 | 2    | 1e+02   | 4  | R.SNVYCVLMLGK.C                                           |
| <a href="#">2556</a> | 645.1481  | 1288.2817 | 1286.6401 | 1.6416  | 1 | 3    | 77      | 4  | R.GTMNLDHIKSR.F                                           |
| <a href="#">2619</a> | 432.7375  | 1295.1907 | 1293.6829 | 1.5078  | 1 | 5    | 52      | 8  | R.SISYYHQLKR.S                                            |
| <a href="#">2630</a> | 648.7836  | 1295.5527 | 1294.7106 | 0.8422  | 1 | 9    | 18      | 4  | R.HASLLRTSSPAR.R                                          |
| <a href="#">2645</a> | 649.9746  | 1297.9347 | 1297.7870 | 0.1477  | 1 | 15   | 5.5     | 2  | K.TILAFLRHSLK.A <a href="#">2648</a> <a href="#">2650</a> |
| <a href="#">2722</a> | 654.6611  | 1307.3077 | 1306.6353 | 0.6724  | 1 | 3    | 83      | 10 | R.WETRRPCFR.R                                             |
| <a href="#">2750</a> | 656.0041  | 1309.9937 | 1308.6245 | 1.3693  | 1 | 12   | 9.7     | 1  | R.DQEMAVAAFRR.C                                           |
| <a href="#">2825</a> | 660.4796  | 1318.9447 | 1317.5983 | 1.3464  | 1 | 1    | 1.4e+02 | 6  | R.SNTRSASSMSEK.A                                          |
| <a href="#">2868</a> | 663.5951  | 1325.1757 | 1324.6596 | 0.5161  | 1 | 11   | 12      | 3  | R.GRATSQVHEANR.F                                          |
| <a href="#">2873</a> | 663.8056  | 1325.5967 | 1325.7377 | -0.1410 | 0 | (11) | 14      | 5  | R.SPQLLMVSGIGPK.D                                         |
| <a href="#">2952</a> | 667.5176  | 1333.0207 | 1332.6952 | 0.3255  | 0 | 7    | 35      | 10 | R.FVHHHVGHVHK.A                                           |
| <a href="#">2992</a> | 669.4071  | 1336.7997 | 1334.6989 | 2.1008  | 2 | 8    | 25      | 4  | R.QGMQLRAGYRR.Y                                           |
| <a href="#">3013</a> | 670.7451  | 1339.4757 | 1340.8140 | -1.3383 | 2 | 2    | 95      | 8  | K.AVVDSKARVLGVK.G                                         |
| <a href="#">3044</a> | 672.1071  | 1342.1997 | 1341.7326 | 0.4671  | 0 | 40   | 0.017   | 1  | R.SPQLLMVSGIGPK.D <a href="#">3056</a>                    |
| <a href="#">3072</a> | 673.9986  | 1345.9827 | 1345.7354 | 0.2474  | 0 | 7    | 31      | 4  | R.FASRPLKPSSEK.G                                          |
| <a href="#">3129</a> | 676.5956  | 1351.1767 | 1352.6758 | -1.4991 | 0 | 3    | 83      | 7  | R.MTVVFAGENTIR.G                                          |
| <a href="#">3148</a> | 677.7611  | 1353.5077 | 1353.5633 | -0.0556 | 0 | 3    | 70      | 6  | R.EGCNTHGTGWHR.L                                          |
| <a href="#">3177</a> | 453.1842  | 1356.5307 | 1355.7898 | 0.7409  | 2 | 7    | 33      | 3  | R.YARSPRPVVR.W <a href="#">3179</a>                       |
| <a href="#">3221</a> | 454.5569  | 1360.6487 | 1357.6772 | 2.9715  | 1 | 10   | 17      | 7  | R.IPAQSSSACGPRK.S                                         |
| <a href="#">3259</a> | 682.7381  | 1363.4617 | 1362.6133 | 0.8485  | 1 | 6    | 39      | 9  | R.GPMLNGCDTSRR.S                                          |
| <a href="#">3273</a> | 683.2801  | 1364.5457 | 1364.6493 | -0.1036 | 0 | 5    | 51      | 8  | R.MLIEVSADTADGK.V                                         |
| <a href="#">3280</a> | 683.7936  | 1365.5727 | 1363.6956 | 1.8771  | 2 | 0    | 1.4e+02 | 9  | K.LDGSRSAPRSYR.K                                          |
| <a href="#">3288</a> | 456.4792  | 1366.4157 | 1363.7459 | 2.6698  | 1 | 3    | 67      | 9  | K.SPSITRALGATYK.N                                         |
| <a href="#">3294</a> | 684.6031  | 1367.1917 | 1368.6238 | -1.4321 | 1 | 3    | 78      | 3  | R.CSSLRTSCAATR.G                                          |
| <a href="#">3336</a> | 1371.7670 | 1370.7597 | 1371.7299 | -0.9702 | 1 | 2    | 1e+02   | 5  | K.YIWKLDELHR.K                                            |
| <a href="#">3356</a> | 458.4399  | 1372.2977 | 1370.6806 | 1.6172  | 0 | 4    | 69      | 8  | R.WTLCGFVSVFR.G                                           |
| <a href="#">3398</a> | 459.6409  | 1375.9007 | 1374.6926 | 1.2082  | 1 | 2    | 1e+02   | 4  | K.VMDRIIGGEVDR.A                                          |
| <a href="#">3406</a> | 689.3421  | 1376.6697 | 1375.6402 | 1.0296  | 2 | 1    | 1.5e+02 | 3  | K.DSPKDRAPMESK.I                                          |
| <a href="#">3435</a> | 691.2706  | 1380.5267 | 1381.6085 | -1.0818 | 0 | 1    | 1.3e+02 | 5  | R.GWEWTCTSTVR.R                                           |
| <a href="#">3586</a> | 700.1756  | 1398.3367 | 1398.7440 | -0.4072 | 2 | 5    | 51      | 3  | R.GRANASRPAESRK.R                                         |
| <a href="#">3637</a> | 702.7536  | 1403.4927 | 1402.6816 | 0.8111  | 1 | 1    | 1.3e+02 | 4  | R.CPVWRESVWGK.S                                           |
| <a href="#">3706</a> | 708.4281  | 1414.8417 | 1414.7065 | 0.1352  | 1 | 4    | 63      | 3  | R.ATSQVHEANRFR.S                                          |
| <a href="#">3714</a> | 708.7586  | 1415.5027 | 1415.7773 | -0.2745 | 1 | 5    | 51      | 9  | R.GEIWSTIVEVRK.E                                          |
| <a href="#">3805</a> | 476.8445  | 1427.5117 | 1425.7113 | 1.8004  | 1 | 11   | 14      | 1  | R.ELARHSSGPGYPR.S <a href="#">3788</a>                    |

|                      |                 |                  |                  |               |          |           |              |          |                                                                                                         |
|----------------------|-----------------|------------------|------------------|---------------|----------|-----------|--------------|----------|---------------------------------------------------------------------------------------------------------|
| <a href="#">3849</a> | <b>716.5976</b> | <b>1431.1807</b> | <b>1429.7062</b> | <b>1.4745</b> | <b>1</b> | <b>2</b>  | <b>1e+02</b> | <b>1</b> | <b>K.DSVNKGWNVGAQR.V</b>                                                                                |
| <a href="#">3897</a> | 719.3581        | 1436.7017        | 1435.6878        | 1.0139        | 1        | 3         | 81           | 9        | R.AGWGMSLATERNK.Q                                                                                       |
| <a href="#">3971</a> | 723.2286        | 1444.4427        | 1442.7412        | 1.7015        | 2        | 6         | 38           | 4        | R.RGTMNLDHIKSR.F                                                                                        |
| <a href="#">3993</a> | 724.1831        | 1446.3517        | 1445.7198        | 0.6320        | 1        | 3         | 78           | 6        | R.LWNVGCRSIADR.K                                                                                        |
| <a href="#">4038</a> | 484.5365        | 1450.5877        | 1451.7593        | -1.1716       | 2        | 6         | 41           | 4        | R.STYRIQTQRGSR.R                                                                                        |
| <a href="#">4062</a> | 485.5882        | 1453.7427        | 1454.7855        | -1.0428       | 1        | 7         | 29           | 3        | R.GFQPGSLGAGRPRR.E                                                                                      |
| <a href="#">4073</a> | 486.0962        | 1455.2667        | 1456.6769        | -1.4102       | 1        | 8         | 24           | 4        | R.MWVLYSDTDRR.R <a href="#">4078</a>                                                                    |
| <a href="#">4096</a> | <b>730.2456</b> | <b>1458.4767</b> | <b>1456.8362</b> | <b>1.6406</b> | <b>2</b> | <b>15</b> | <b>5.4</b>   | <b>1</b> | <b>R.NVGKLSLSRLDGAK.E <a href="#">4088</a> <a href="#">4100</a></b>                                     |
| <a href="#">4110</a> | 730.9926        | 1459.9707        | 1458.7263        | 1.2445        | 1        | 2         | 90           | 3        | R.HPCGRIGQGQPPR.K                                                                                       |
| <a href="#">4133</a> | 732.2791        | 1462.5437        | 1462.7602        | -0.2165       | 1        | 6         | 43           | 10       | K.KEPFVQSCVTIR.S                                                                                        |
| <a href="#">4158</a> | 489.3892        | 1465.1457        | 1466.8867        | -1.7410       | 1        | 2         | 90           | 8        | R.ARILLCRPVTLR.S                                                                                        |
| <a href="#">4163</a> | <b>489.6049</b> | <b>1465.7927</b> | <b>1464.7361</b> | <b>1.0566</b> | <b>0</b> | <b>12</b> | <b>9.2</b>   | <b>1</b> | <b>R.SYITHHTINPYTR.R</b>                                                                                |
| <a href="#">4179</a> | 734.9661        | 1467.9177        | 1469.7436        | -1.8258       | 1        | 2         | 93           | 6        | R.LLTSMKDYASDVK.C                                                                                       |
| <a href="#">4187</a> | <b>490.5599</b> | <b>1468.6577</b> | <b>1466.7109</b> | <b>1.9468</b> | <b>0</b> | <b>17</b> | <b>3.3</b>   | <b>1</b> | <b>R.DLLGSMVAVTMLER.I <a href="#">4168</a></b>                                                          |
| <a href="#">4188</a> | 490.7335        | 1469.1787        | 1466.8392        | 2.3396        | 2        | 9         | 20           | 2        | R.RLVIVGDVHGMKK.S <a href="#">4189</a>                                                                  |
| <a href="#">4254</a> | 738.7401        | 1475.4657        | 1473.6381        | 1.8276        | 0        | 6         | 44           | 7        | K.SAYCTMVDSWVR.R <a href="#">4230</a>                                                                   |
| <a href="#">4262</a> | 739.3061        | 1476.5977        | 1477.7963        | -1.1986       | 0        | 2         | 1e+02        | 2        | R.LISISPFVTVCSR.E                                                                                       |
| <a href="#">4388</a> | 747.2191        | 1492.4237        | 1489.8253        | 2.5985        | 1        | 2         | 98           | 4        | R.TGGGKTLNQFNILK.C                                                                                      |
| <a href="#">4453</a> | 501.5585        | 1501.6537        | 1502.7987        | -1.1450       | 2        | 10        | 18           | 8        | R.SRSDGLVVMREVR.S <a href="#">4452</a>                                                                  |
| <a href="#">4461</a> | 752.0116        | 1502.0087        | 1499.7555        | 2.2532        | 1        | 1         | 1.4e+02      | 4        | K.DCLAVRSLFTYR.G                                                                                        |
| <a href="#">4463</a> | 501.7009        | 1502.0807        | 1503.7715        | -1.6908       | 2        | 4         | 68           | 5        | R.DDARLMKGALDTAK.V                                                                                      |
| <a href="#">4498</a> | 502.8982        | 1505.6727        | 1503.8661        | 1.8067        | 1        | 9         | 22           | 6        | K.LPYTTAVIKETLR.L                                                                                       |
| <a href="#">4506</a> | 754.3846        | 1506.7547        | 1505.7508        | 1.0039        | 1        | 2         | 91           | 4        | R.NGSIMGVPTSKNASK.R                                                                                     |
| <a href="#">4604</a> | 760.8101        | 1519.6057        | 1518.7937        | 0.8121        | 2        | (1)       | 1.3e+02      | 8        | R.SRSDGLVVMREVR.S                                                                                       |
| <a href="#">4608</a> | 507.6035        | 1519.7887        | 1516.7854        | 3.0033        | 1        | 3         | 84           | 10       | R.GSISPMVRLSPMSR.J                                                                                      |
| <a href="#">4697</a> | 764.8131        | 1527.6117        | 1525.8940        | 1.7177        | 2        | 3         | 81           | 9        | R.LSQDKTKLKPVR.F <a href="#">4681</a>                                                                   |
| <a href="#">4766</a> | 768.6211        | 1535.2277        | 1536.7752        | -1.5475       | 2        | 9         | 19           | 2        | R.KMISTVCSDNVGR.G <a href="#">4771</a>                                                                  |
| <a href="#">4858</a> | 772.8551        | 1543.6957        | 1540.7192        | 2.9766        | 0        | 0         | 1.6e+02      | 2        | R.SPPGCGPLSPETQSK.Q                                                                                     |
| <a href="#">4894</a> | 516.1959        | 1545.5657        | 1543.8219        | 1.7438        | 1        | 0         | 1.4e+02      | 7        | R.GQPRYGLSNQVLR.N                                                                                       |
| <a href="#">5028</a> | <b>520.6872</b> | <b>1559.0397</b> | <b>1558.8885</b> | <b>0.1513</b> | <b>2</b> | <b>20</b> | <b>1.5</b>   | <b>1</b> | <b>R.WLAFHKIGLYRR.L</b>                                                                                 |
| <a href="#">5029</a> | 780.5346        | 1559.0547        | 1557.6651        | 1.3897        | 1        | 5         | 57           | 9        | R.CETEIKSMSSGDAK.L                                                                                      |
| <a href="#">5126</a> | 524.3715        | 1570.0927        | 1567.7599        | 2.3328        | 1        | 2         | 92           | 3        | R.QCQMRLVSVEYR.K                                                                                        |
| <a href="#">5337</a> | 530.6565        | 1588.9477        | 1587.8337        | 1.1140        | 2        | 1         | 1.2e+02      | 8        | R.LKRCGLAPTSICGR.N                                                                                      |
| <a href="#">5383</a> | 797.6791        | 1593.3437        | 1590.8558        | 2.4879        | 1        | 0         | 1.4e+02      | 4        | K.TVWVPFAATSAAWKK.R                                                                                     |
| <a href="#">5437</a> | 800.6206        | 1599.2267        | 1596.6989        | 2.5278        | 1        | 1         | 1.2e+02      | 2        | R.GSHGTRSSDHAAGDR.Y                                                                                     |
| <a href="#">5443</a> | 534.2212        | 1599.6417        | 1600.8468        | -1.2050       | 2        | 12        | 9.9          | 2        | K.VVSASPRTCQKNVR.R <a href="#">5476</a>                                                                 |
| <a href="#">5450</a> | <b>534.3632</b> | <b>1600.0677</b> | <b>1598.8603</b> | <b>1.2075</b> | <b>1</b> | <b>9</b>  | <b>20</b>    | <b>1</b> | <b>R.AIATFHPKMEIGIR.R</b>                                                                               |
| <a href="#">5497</a> | 802.3376        | 1602.6607        | 1599.8443        | 2.8165        | 0        | 5         | 46           | 8        | R.IPYLGASAMHLNVAK.V <a href="#">5429</a> <a href="#">5463</a> <a href="#">5477</a> <a href="#">5490</a> |
| <a href="#">5546</a> | 536.5269        | 1606.5587        | 1606.7602        | -0.2015       | 0        | 8         | 27           | 3        | R.DWMYAVGPLTPWR.G                                                                                       |
| <a href="#">5589</a> | 537.6929        | 1610.0567        | 1608.7613        | 1.2954        | 2        | 4         | 67           | 7        | R.DQEMAVAAFRRCR.E                                                                                       |
| <a href="#">5649</a> | 539.1479        | 1614.4217        | 1611.7689        | 2.6529        | 1        | 6         | 41           | 4        | R.GNVHIGRFCQPDGR.T                                                                                      |

|                      |                 |                  |                  |                |   |     |         |    |                                                                 |
|----------------------|-----------------|------------------|------------------|----------------|---|-----|---------|----|-----------------------------------------------------------------|
| <a href="#">5665</a> | 808.7146        | 1615.4147        | 1614.8525        | 0.5622         | 1 | 0   | 1.4e+02 | 9  | R.AHCGQLPRHASLLR.T                                              |
| <a href="#">5670</a> | 539.5739        | 1615.6997        | 1614.7130        | 0.9867         | 0 | 5   | 47      | 8  | R.AFGQSATVDVMACSR.S                                             |
| <a href="#">5694</a> | <b>540.2372</b> | <b>1617.6897</b> | <b>1618.8245</b> | <b>-1.1348</b> | 0 | 6   | 42      | 1  | R.VSMLIHSCCLIMVGK.N                                             |
| <a href="#">5748</a> | 541.6912        | 1622.0517        | 1623.8151        | -1.7634        | 0 | 4   | 60      | 3  | R.GVGNQTSPLHCLVSR.H <a href="#">5783</a>                        |
| <a href="#">5778</a> | 542.2395        | 1623.6967        | 1623.8621        | -0.1653        | 0 | 4   | 53      | 5  | R.VYGGQSALVLANFTGK.E                                            |
| <a href="#">5894</a> | 545.6965        | 1634.0677        | 1631.8777        | 2.1900         | 2 | 10  | 14      | 2  | R.DLLRSRSDGLVVMR.E <a href="#">5893</a>                         |
| <a href="#">6130</a> | 826.8116        | 1651.6087        | 1650.8035        | 0.8052         | 0 | 13  | 7.1     | 2  | R.EALMESNNLNIFTR.T                                              |
| <a href="#">6249</a> | 554.7065        | 1661.0977        | 1660.9552        | 0.1425         | 0 | 2   | 97      | 7  | K.LFLISAVAFSILPDR.H                                             |
| <a href="#">6359</a> | <b>835.7736</b> | <b>1669.5327</b> | <b>1669.9291</b> | <b>-0.3963</b> | 0 | 10  | 13      | 1  | K.EVSWVPAETISILK.N                                              |
| <a href="#">6461</a> | 559.5655        | 1675.6747        | 1673.8525        | 1.8222         | 0 | 2   | 89      | 7  | K.NIITGFAHAAEFLDR.A                                             |
| <a href="#">6707</a> | 565.1749        | 1692.5027        | 1692.7638        | -0.2611        | 0 | 2   | 83      | 6  | R.ATGHGLEACPDGGAGAPR.G <a href="#">6708</a>                     |
| <a href="#">6735</a> | 848.7581        | 1695.5017        | 1694.8516        | 0.6502         | 0 | 9   | 16      | 3  | R.VVSFLASDTAEWVSGK.I <a href="#">6750</a>                       |
| <a href="#">6754</a> | 566.6855        | 1697.0347        | 1696.8533        | 0.1815         | 0 | 5   | 46      | 3  | R.GLLSHDPVDQIANYSR.D <a href="#">6770</a>                       |
| <a href="#">6782</a> | <b>850.7426</b> | <b>1699.4707</b> | <b>1698.8253</b> | <b>0.6454</b>  | 0 | 79  | 2e-06   | 1  | K.GLLTNPQQDYFAFEK.H <a href="#">6778</a>                        |
| <a href="#">6888</a> | 854.1636        | 1706.3127        | 1707.7999        | -1.4871        | 0 | 1   | 1.1e+02 | 8  | K.ISTIHDPVMSDNHR.L                                              |
| <a href="#">6938</a> | 856.5566        | 1711.0987        | 1709.8229        | 1.2758         | 0 | 5   | 42      | 4  | R.IQMPCASQSVSFIR.V <a href="#">6937</a>                         |
| <a href="#">6939</a> | 571.3845        | 1711.1317        | 1711.8141        | -0.6823        | 1 | 2   | 88      | 6  | R.FPVRFSAGWEMETR.G                                              |
| <a href="#">7064</a> | 575.5309        | 1723.5707        | 1721.7905        | 1.7802         | 0 | 4   | 60      | 10 | K.NYFSMSAALMTPFSR.G                                             |
| <a href="#">7085</a> | 863.8211        | 1725.6277        | 1722.8505        | 2.7772         | 2 | 6   | 31      | 7  | R.CESCAKRSGLIISSR.R                                             |
| <a href="#">7299</a> | 874.8686        | 1747.7227        | 1746.8067        | 0.9160         | 1 | 6   | 40      | 5  | R.TGADGNGSVRMAQSPGSR.S <a href="#">7300</a>                     |
| <a href="#">7352</a> | <b>878.6021</b> | <b>1755.1897</b> | <b>1753.9951</b> | <b>1.1946</b>  | 2 | 1   | 1.2e+02 | 1  | R.AGVELVQKGAVERSWVR.V                                           |
| <a href="#">7380</a> | 880.2941        | 1758.5737        | 1758.8934        | -0.3197        | 1 | 3   | 68      | 4  | K.SQIDGQTIQPIRMEK.V                                             |
| <a href="#">7397</a> | <b>880.8521</b> | <b>1759.6897</b> | <b>1758.9920</b> | <b>0.6977</b>  | 0 | 89  | 1.8e-07 | 1  | K.VLYLGVSDTPAWLVVK.C <a href="#">7399</a>                       |
| <a href="#">7473</a> | 589.6162        | 1765.8267        | 1762.8613        | 2.9654         | 1 | 5   | 45      | 6  | R.RDWMYAVGPLTPWR.G                                              |
| <a href="#">7536</a> | 886.6126        | 1771.2107        | 1769.8474        | 1.3633         | 1 | 6   | 39      | 3  | R.MRDLLGSMVAVTMLER.I <a href="#">7541</a>                       |
| <a href="#">7559</a> | 591.9542        | 1772.8407        | 1773.8679        | -1.0272        | 1 | 3   | 75      | 10 | R.SKNEGTAALELPQTCR.F                                            |
| <a href="#">7737</a> | 894.2246        | 1786.4347        | 1785.9710        | 0.4637         | 2 | 5   | 51      | 7  | R.QGGVGERPPAIREHK.Q                                             |
| <a href="#">7828</a> | <b>898.6956</b> | <b>1795.3767</b> | <b>1793.8519</b> | <b>1.5248</b>  | 0 | 18  | 2.2     | 1  | K.MGFPEAQGFNSGNLLGR.S <a href="#">7816</a> <a href="#">7836</a> |
| <a href="#">7834</a> | 599.6475        | 1795.9207        | 1795.9841        | -0.0634        | 1 | 3   | 70      | 2  | R.IRCPTLMLVIYVYR.C                                              |
| <a href="#">7951</a> | 603.5389        | 1807.5947        | 1808.0342        | -0.4395        | 2 | 5   | 42      | 4  | K.TRTITITFMLAGLKS.R.T                                           |
| <a href="#">7955</a> | 603.8105        | 1808.4097        | 1809.8468        | -1.4371        | 0 | (5) | 45      | 4  | K.MGFPEAQGFNSGNLLGR.S                                           |
| <a href="#">7973</a> | <b>906.6056</b> | <b>1811.1967</b> | <b>1811.9790</b> | <b>-0.7823</b> | 1 | (1) | 1.1e+02 | 1  | R.IRCPTLMLVIYVYR.C                                              |
| <a href="#">7980</a> | 906.7636        | 1811.5127        | 1812.9469        | -1.4341        | 0 | 7   | 26      | 4  | K.ENIEALGLVLSEEEIR.E                                            |
| <a href="#">8055</a> | 606.7882        | 1817.3427        | 1818.9476        | -1.6048        | 1 | 5   | 46      | 8  | K.VYIAELGLDTLRDDAR.L                                            |
| <a href="#">8240</a> | 614.4069        | 1840.1987        | 1840.7832        | -0.5845        | 1 | 1   | 1.1e+02 | 8  | K.SDEIPDSYGLNCRS.S                                              |
| <a href="#">8513</a> | 624.1812        | 1869.5217        | 1870.9982        | -1.4764        | 2 | 3   | 76      | 6  | R.KPSPCCIRQTSRLR.R                                              |
| <a href="#">8518</a> | 624.2215        | 1869.6427        | 1871.0013        | -1.3586        | 1 | 4   | 54      | 7  | R.ISPSQSWALARLQGTTR.S                                           |
| <a href="#">8977</a> | 639.6395        | 1915.8967        | 1915.9747        | -0.0780        | 0 | 1   | 1.1e+02 | 8  | R.GITLTTMTTPVVDAAHK.I                                           |
| <a href="#">9141</a> | <b>646.7195</b> | <b>1937.1367</b> | <b>1936.9346</b> | <b>0.2021</b>  | 0 | 8   | 24      | 1  | K.SGVNSMAMLSAISATENVR.I <a href="#">9149</a>                    |
| <a href="#">9158</a> | 647.7345        | 1940.1817        | 1939.0601        | 1.1216         | 0 | 5   | 44      | 3  | R.LLVLPNMAGLQLNVDWK.S <a href="#">9150</a>                      |
| <a href="#">9175</a> | 648.5755        | 1942.7047        | 1944.0932        | -1.3884        | 1 | 3   | 78      | 6  | K.EDVQLLNKLPYTTAVIK.E <a href="#">9198</a>                      |

|                       |                  |                  |                  |               |          |           |            |          |                                                                              |
|-----------------------|------------------|------------------|------------------|---------------|----------|-----------|------------|----------|------------------------------------------------------------------------------|
| <a href="#">9190</a>  | 649.1355         | 1944.3847        | 1944.1044        | 0.2803        | 1        | 1         | 1.1e+02    | 7        | K.KIHNTLTTTASF <del>AI</del> VSLK.R                                          |
| <a href="#">9243</a>  | 651.4569         | 1951.3487        | 1952.0163        | -0.6675       | 2        | 1         | 1.2e+02    | 9        | R.YVEIQDRIHMHSRLR.S                                                          |
| <a href="#">9355</a>  | 655.9339         | 1964.7797        | 1964.0513        | 0.7284        | 0        | 2         | 84         | 4        | R.AINTGHLTVMILDPLGQR.F                                                       |
| <a href="#">9474</a>  | 661.1162         | 1980.3267        | 1980.0754        | 0.2513        | 0        | 2         | 87         | 9        | R.TASVAFLFP <del>EM</del> TISVVIR.L                                          |
| <a href="#">9571</a>  | 665.0005         | 1991.9797        | 1992.8782        | -0.8985       | 1        | 8         | 22         | 2        | R.MCSWTEENPSARGIPSR.E                                                        |
| <a href="#">9665</a>  | 668.6535         | 2002.9387        | 2002.0120        | 0.9268        | 1        | 4         | 55         | 3        | R.EDASIVGFITASHSLGDRK.T                                                      |
| <a href="#">9692</a>  | 669.8185         | 2006.4337        | 2005.0541        | 1.3797        | 1        | 2         | 75         | 5        | R.MQRGQLVIQH <del>HH</del> HS <del>GH</del> SGK.V                            |
| <a href="#">9760</a>  | 672.7395         | 2015.1967        | 2016.0462        | -0.8495       | 1        | 14        | 5.5        | 2        | K.VPVGSLDYIPRDMGNIR.Y <a href="#">9761</a>                                   |
| <a href="#">9763</a>  | 1008.7861        | 2015.5577        | 2016.0752        | -0.5175       | 1        | 1         | 1e+02      | 9        | R.SLSGLDSRLTSSLHPPPPR.M                                                      |
| <a href="#">9793</a>  | 674.3675         | 2020.0807        | 2022.0330        | -1.9523       | 2        | 1         | 1.1e+02    | 9        | K.APWSLGCATSAPLRRHSR.H                                                       |
| <a href="#">9795</a>  | 1011.2791        | 2020.5437        | 2020.0445        | 0.4992        | 1        | 1         | 1e+02      | 4        | R.LILTLPMSSATRSMDAAAR.A                                                      |
| <a href="#">9910</a>  | 678.4462         | 2032.3167        | 2034.1150        | -1.7983       | 0        | 1         | 97         | 6        | K.QFEG <del>LQ</del> GIIEFLIITGR.L                                           |
| <a href="#">9981</a>  | 680.1329         | 2037.3767        | 2036.9951        | 0.3816        | 1        | 7         | 27         | 3        | K.YLFMELESIYRMPVK.Q                                                          |
| <a href="#">10174</a> | 686.7552         | 2057.2437        | 2059.0586        | -1.8149       | 1        | 6         | 30         | 5        | K.GPKETDVSPHLGLQEIDPK.W <a href="#">10179</a>                                |
| <a href="#">10365</a> | <b>694.1735</b>  | <b>2079.4987</b> | <b>2077.1069</b> | <b>2.3919</b> | <b>1</b> | <b>6</b>  | <b>31</b>  | <b>1</b> | <b>R.YSPGSHVHALPRLSLTSQK.V</b>                                               |
| <a href="#">10392</a> | 1041.7811        | 2081.5477        | 2080.0484        | 1.4994        | 2        | 5         | 40         | 4        | K.ARGDNPMHAGGITSGSAKLPK.G                                                    |
| <a href="#">10397</a> | 695.0242         | 2082.0507        | 2081.8920        | 0.1587        | 0        | 3         | 61         | 4        | K.VHQESNSSLSGSM <del>TG</del> ESSR.S <a href="#">10388</a>                   |
| <a href="#">10548</a> | 702.4549         | 2104.3427        | 2103.1014        | 1.2414        | 1        | 7         | 24         | 7        | R.ARDAQLLHLHWADVAYPK.W                                                       |
| <a href="#">10631</a> | 707.0865         | 2118.2377        | 2117.8531        | 0.3846        | 1        | 5         | 43         | 2        | R.FRGSESEM <del>SC</del> PYHSTGDR.L                                          |
| <a href="#">10773</a> | 1069.9991        | 2137.9837        | 2138.8422        | -0.8585       | 0        | 0         | 1.2e+02    | 3        | R.YGMPDSSNFFCSNSSPNGR.W                                                      |
| <a href="#">10811</a> | 715.1469         | 2142.4187        | 2140.1389        | 2.2798        | 2        | 1         | 98         | 7        | K.GDVHIASSKIREVAVDFAAR.F <a href="#">10815</a>                               |
| <a href="#">11011</a> | 723.8265         | 2168.4577        | 2166.1671        | 2.2906        | 2        | 5         | 44         | 6        | R.YGIVLHHHQNLNKARNPR.H                                                       |
| <a href="#">11715</a> | <b>758.3255</b>  | <b>2271.9547</b> | <b>2271.1834</b> | <b>0.7713</b> | <b>1</b> | <b>3</b>  | <b>66</b>  | <b>1</b> | <b>K.LFSNVPKAPWSLGCATSAPLR.R <a href="#">11713</a></b>                       |
| <a href="#">11851</a> | <b>1144.6306</b> | <b>2287.2467</b> | <b>2287.0799</b> | <b>0.1668</b> | <b>0</b> | <b>6</b>  | <b>32</b>  | <b>1</b> | <b>R.DILPMCESEGMGLAPWGV<del>LGR</del>.G</b>                                  |
| <a href="#">11881</a> | 765.3182         | 2292.9327        | 2294.0348        | -1.1020       | 0        | 6         | 32         | 5        | R.GELAMAFQFEIMDIDHGPGGK.F <a href="#">11889</a>                              |
| <a href="#">11923</a> | 767.2472         | 2298.7197        | 2296.2361        | 2.4836        | 1        | 1         | 94         | 8        | R.LLVLPN <del>MAG</del> LQLNVDWKS <del>NR</del> .R                           |
| <a href="#">11966</a> | 768.8232         | 2303.4477        | 2301.2111        | 2.2367        | 2        | 3         | 64         | 9        | R.TSPRLGSEQSNAIAVLVKCSGK.L <a href="#">11967</a>                             |
| <a href="#">12059</a> | 772.2609         | 2313.7607        | 2315.0634        | -1.3027       | 1        | 4         | 54         | 5        | K.QLMNITCTYSHRSSQTSTGK.T                                                     |
| <a href="#">12139</a> | 776.2692         | 2325.7857        | 2323.0824        | 2.7033        | 1        | 0         | 1.2e+02    | 8        | R.LDGAK <del>EW</del> NIVMLAGMQSGDEK.A                                       |
| <a href="#">12560</a> | 798.2119         | 2391.6137        | 2392.2645        | -0.6508       | 2        | 1         | 88         | 9        | R.RTSGVGAGL <del>TR</del> M <del>TV</del> VFAGENTIR.G                        |
| <a href="#">12921</a> | 815.2799         | 2442.8177        | 2442.3417        | 0.4761        | 2        | 5         | 42         | 2        | R.SSIRD <del>LI</del> QATLLAWRQISPMK.W                                       |
| <a href="#">13151</a> | 825.8425         | 2474.5057        | 2474.0689        | 0.4368        | 0        | 3         | 58         | 3        | R.TSNDH <del>DM</del> LIDEAAEASSHISGMK.L                                     |
| <a href="#">13166</a> | <b>826.3032</b>  | <b>2475.8877</b> | <b>2474.2012</b> | <b>1.6865</b> | <b>1</b> | <b>11</b> | <b>8.7</b> | <b>1</b> | <b>K.SSLT<del>MA</del>TQHK<del>TQ</del>SSPVNAAWK.K <a href="#">13159</a></b> |
| <a href="#">13328</a> | 833.7749         | 2498.3027        | 2496.2357        | 2.0670        | 2        | 3         | 55         | 6        | R.SGSLQGS <del>DR</del> DWPVSIPPTQARDK.J                                     |
| <a href="#">13356</a> | <b>835.0869</b>  | <b>2502.2387</b> | <b>2502.1090</b> | <b>0.1298</b> | <b>2</b> | <b>1</b>  | <b>86</b>  | <b>1</b> | <b>R.FLKAGM<del>SER</del>MCSWTEENPSAR.G</b>                                  |
| <a href="#">13417</a> | 837.3579         | 2509.0517        | 2510.1925        | -1.1408       | 1        | 3         | 54         | 2        | K.VPSDDPNEKSTPLAASFSASFSTR.J                                                 |
| <a href="#">13614</a> | 844.8349         | 2531.4827        | 2533.2379        | -1.7552       | 2        | (1)       | 1e+02      | 5        | R.EMPARITQMF <del>MD</del> V <del>TSS</del> KFGLTK.T                         |
| <a href="#">13622</a> | 845.4382         | 2533.2927        | 2533.2379        | 0.0548        | 2        | 2         | 85         | 7        | R.EMPARITQMF <del>MD</del> V <del>TSS</del> KFGLTK.T <a href="#">13628</a>   |
| <a href="#">14003</a> | 870.3822         | 2608.1247        | 2608.4700        | -0.3453       | 2        | 1         | 82         | 6        | R.HANITKKIHNTLTTTASF <del>AI</del> VSLK.R                                    |
| <a href="#">14052</a> | 871.4142         | 2611.2207        | 2611.3533        | -0.1326       | 0        | 7         | 22         | 2        | R.NTTSTLIYSYLLAQHPEVLAK.I                                                    |
| <a href="#">14217</a> | <b>883.4865</b>  | <b>2647.4377</b> | <b>2645.2755</b> | <b>2.1623</b> | <b>1</b> | <b>2</b>  | <b>70</b>  | <b>1</b> | <b>R.ETASSSYLREALMESNNLNIFTR.T</b>                                           |

|                       |           |           |           |         |   |     |      |   |                                     |                       |
|-----------------------|-----------|-----------|-----------|---------|---|-----|------|---|-------------------------------------|-----------------------|
| <a href="#">14249</a> | 885.4762  | 2653.4067 | 2652.3509 | 1.0558  | 0 | 24  | 0.49 | 1 | R.IVDASIFPFAIDGQPMGTVYALAEK.I       | <a href="#">14246</a> |
| <a href="#">14347</a> | 889.8975  | 2666.6707 | 2668.3458 | -1.6751 | 0 | (6) | 28   | 3 | R.IVDASIFPFAIDGQPMGTVYALAEK.I       | <a href="#">14363</a> |
| <a href="#">14389</a> | 891.2629  | 2670.7667 | 2668.3405 | 2.4262  | 1 | 7   | 21   | 1 | R.LQTVRFAGHGDTGNGGIGVMRPSWR.J       | <a href="#">14391</a> |
| <a href="#">14467</a> | 895.1245  | 2682.3517 | 2684.3354 | -1.9837 | 1 | (3) | 55   | 2 | R.LQTVRFAGHGDTGNGGIGVMRPSWR.J       |                       |
| <a href="#">14559</a> | 901.2685  | 2700.7837 | 2700.2701 | 0.5136  | 0 | 1   | 85   | 8 | R.QPEPISASDVPLDTENMGNTFAVPR.A       |                       |
| <a href="#">14933</a> | 1394.0221 | 2786.0297 | 2783.4184 | 2.6113  | 2 | 4   | 42   | 2 | K.HCTRGHVVPQVSHSPLISGGRVMTR.R       |                       |
| <a href="#">15119</a> | 950.8082  | 2849.4027 | 2848.5142 | 0.8885  | 2 | 0   | 95   | 6 | K.TTLRDTSSLTDELSRIGALSSAVQVTK.R     |                       |
| <a href="#">15291</a> | 975.9262  | 2924.7567 | 2923.3633 | 1.3934  | 1 | 4   | 42   | 5 | K.AVGFDRGELAMAFQFEIMDIDHGPGGK.F     |                       |
| <a href="#">15489</a> | 1008.3449 | 3022.0127 | 3021.6474 | 0.3654  | 2 | 3   | 50   | 1 | R.DLIQATLLAWRQISPMKWPLSGSVAPK.A     |                       |
| <a href="#">15873</a> | 1065.2952 | 3192.8637 | 3193.5114 | -0.6476 | 2 | 3   | 46   | 4 | R.GELAMAFQFEIMDIDHGPGGKFSPhKYR.M    |                       |
| <a href="#">15996</a> | 1087.8809 | 3260.6207 | 3260.7056 | -0.0849 | 1 | 0   | 92   | 5 | R.GYPNMLYTPVPRGLLTPLFAAWPLTAETR.K   |                       |
| <a href="#">16113</a> | 1104.4319 | 3310.2737 | 3310.6200 | -0.3463 | 2 | 1   | 77   | 5 | R.TNLVCADVGRCALHLGSAKHFOHPPSGEPR.E  |                       |
| <a href="#">16115</a> | 1104.8045 | 3311.3917 | 3312.4072 | -1.0155 | 1 | 1   | 79   | 2 | R.SLFCFWCDWSRACSYSQLPMLSACHK.Q      |                       |
| <a href="#">16147</a> | 1110.7329 | 3329.1767 | 3327.6545 | 1.5223  | 2 | 5   | 27   | 2 | R.GNVHIGRFCQPDGRTHSGTGTAQLALWHVR.M  | <a href="#">16146</a> |
| <a href="#">16209</a> | 1120.3712 | 3358.0917 | 3356.6659 | 1.4258  | 2 | 1   | 66   | 1 | R.LFHHSMECRGGLDFEGELLARVQLGWTVR.R   |                       |
| <a href="#">16259</a> | 1131.4672 | 3391.3797 | 3388.8006 | 2.5792  | 2 | 1   | 66   | 1 | R.GYPNMLYTPVPRGLLTPLFAAWPLTAETR.K.S |                       |
| <a href="#">16306</a> | 1142.3982 | 3424.1727 | 3424.7934 | -0.6207 | 1 | 6   | 22   | 1 | K.GLWPFSTQYPTMSLLKTFYTIIVITWR.L     |                       |
| <a href="#">16386</a> | 1157.8399 | 3470.4977 | 3467.6485 | 2.8492  | 0 | 8   | 15   | 1 | R.VYSWSIMNSMIFSSMEIVDVMLSIVEAASGR.F |                       |

87. [gi|220690378|gb|EED46728.1|](#) Mass: 53164 Score: 292 Queries matched: 16 emPAI: 0.52

glutamate carboxypeptidase, putative [Aspergillus flavus NRRL3357]

| Query                 | Observed  | Mr(expt)  | Mr(calc)  | Delta   | Miss | Score | Expect  | Rank | Peptide                                                                                    |
|-----------------------|-----------|-----------|-----------|---------|------|-------|---------|------|--------------------------------------------------------------------------------------------|
| <a href="#">579</a>   | 459.7451  | 917.4757  | 918.5651  | -1.0894 | 1    | 7     | 48      | 3    | K.VIGKFSIR.T                                                                               |
| <a href="#">2469</a>  | 639.7816  | 1277.5487 | 1277.6074 | -0.0587 | 0    | 26    | 0.42    | 1    | K.QVFGVEPDMTR.E                                                                            |
| <a href="#">3259</a>  | 682.7381  | 1363.4617 | 1362.6779 | 0.7838  | 0    | 79    | 1.8e-06 | 1    | K.QVDGLAESFIER.L <a href="#">3271</a>                                                      |
| <a href="#">3772</a>  | 713.1076  | 1424.2007 | 1424.7048 | -0.5041 | 0    | 7     | 28      | 6    | K.NTLDVWLQHDGK.W                                                                           |
| <a href="#">5284</a>  | 529.2199  | 1584.6377 | 1583.8267 | 0.8110  | 1    | 9     | 20      | 1    | K.AVAIPSVSAQDENRK.D                                                                        |
| <a href="#">7032</a>  | 861.3981  | 1720.7817 | 1719.8679 | 0.9138  | 0    | 45    | 0.0043  | 1    | R.EGGSIPVTLSEFQATGK.N                                                                      |
| <a href="#">9010</a>  | 640.7325  | 1919.1757 | 1916.9632 | 2.2125  | 0    | 30    | 0.13    | 1    | R.YPSLSLHGIEGAYSAPGAK.T                                                                    |
| <a href="#">10495</a> | 1049.7551 | 2097.4957 | 2096.0572 | 1.4385  | 0    | 102   | 9.1e-09 | 1    | K.NVLLLPMGSSTDAHSINEK.L                                                                    |
| <a href="#">10601</a> | 705.0895  | 2112.2467 | 2112.0521 | 0.1946  | 0    | (15)  | 4       | 1    | K.NVLLLPMGSSTDAHSINEK.L                                                                    |
| <a href="#">11618</a> | 752.4715  | 2254.3927 | 2252.0783 | 2.3144  | 0    | 33    | 0.071   | 1    | K.ALYPNISYTMDDLHQSLGSK.T <a href="#">11601</a> <a href="#">11603</a> <a href="#">11617</a> |
| <a href="#">13306</a> | 832.6205  | 2494.8397 | 2494.3002 | 0.5395  | 0    | 65    | 4.1e-05 | 1    | R.MAQFLASELEALGAEVHQRPLGK.Q <a href="#">13314</a>                                          |

88. [gi|220690692|gb|EED47041.1|](#) Mass: 29383 Score: 289 Queries matched: 33 emPAI: 1.12

40S ribosomal protein S3, putative [Aspergillus flavus NRRL3357]

| Query               | Observed | Mr(expt) | Mr(calc) | Delta  | Miss | Score | Expect | Rank | Peptide                          |
|---------------------|----------|----------|----------|--------|------|-------|--------|------|----------------------------------|
| <a href="#">91</a>  | 714.5520 | 713.5447 | 713.4436 | 0.1012 | 0    | 14    | 6.8    | 1    | R.QGVLGIK.V                      |
| <a href="#">613</a> | 466.3231 | 930.6317 | 930.5386 | 0.0931 | 0    | 31    | 0.17   | 1    | R.ELTSLIQK.R <a href="#">615</a> |

|                       |           |           |           |         |   |    |         |   |                                                                                                                            |
|-----------------------|-----------|-----------|-----------|---------|---|----|---------|---|----------------------------------------------------------------------------------------------------------------------------|
| <a href="#">632</a>   | 470.2471  | 938.4797  | 937.4505  | 1.0292  | 0 | 27 | 0.26    | 1 | K.EFIDSATR.H <a href="#">628</a> <a href="#">629</a> <a href="#">630</a>                                                   |
| <a href="#">841</a>   | 495.5471  | 989.0797  | 990.5168  | -1.4371 | 0 | 9  | 23      | 5 | -.MAAVQGAIK.R <a href="#">844</a>                                                                                          |
| <a href="#">2050</a>  | 614.8086  | 1227.6027 | 1226.7234 | 0.8793  | 0 | 29 | 0.2     | 1 | R.VTPTVTDIIIR.A                                                                                                            |
| <a href="#">2515</a>  | 642.8956  | 1283.7767 | 1283.6582 | 0.1186  | 0 | 85 | 5.2e-07 | 1 | K.AIAAQQAEEQQR.L                                                                                                           |
| <a href="#">2688</a>  | 652.2036  | 1302.3927 | 1302.7190 | -0.3263 | 2 | 0  | 1.6e+02 | 6 | -.MAAVQGAIKRR.K                                                                                                            |
| <a href="#">2769</a>  | 657.5946  | 1313.1747 | 1311.7286 | 1.4461  | 0 | 13 | 7.5     | 1 | K.TLPDSVTIIEPK.E <a href="#">2758</a>                                                                                      |
| <a href="#">2873</a>  | 663.8056  | 1325.5967 | 1324.6663 | 0.9304  | 0 | 56 | 0.00041 | 1 | K.FPENSVSLYAAK.V <a href="#">2876</a>                                                                                      |
| <a href="#">3776</a>  | 713.3751  | 1424.7357 | 1424.7008 | 0.0349  | 0 | 55 | 0.00042 | 1 | R.ATHTQEVLGEEQGR.R <a href="#">3784</a>                                                                                    |
| <a href="#">3900</a>  | 719.4671  | 1436.9197 | 1436.6783 | 0.2414  | 0 | 33 | 0.084   | 1 | R.ELAEEGYSGVEVR.V <a href="#">3896</a> <a href="#">3897</a> <a href="#">3904</a> <a href="#">3905</a> <a href="#">3912</a> |
| <a href="#">4764</a>  | 768.5621  | 1535.1097 | 1534.7239 | 0.3859  | 0 | 37 | 0.028   | 1 | K.FTDGFMIHSGQPAK.E <a href="#">4763</a>                                                                                    |
| <a href="#">5123</a>  | 785.7576  | 1569.5007 | 1569.7933 | -0.2926 | 2 | 8  | 24      | 4 | K.IMRGSDPEGKAGPQK.T                                                                                                        |
| <a href="#">5464</a>  | 801.3546  | 1600.6947 | 1599.8297 | 0.8651  | 1 | 55 | 0.00053 | 1 | R.FKFPENSVSLYAAK.V <a href="#">5444</a> <a href="#">5467</a> <a href="#">5471</a>                                          |
| <a href="#">10125</a> | 1026.8516 | 2051.6887 | 2050.9789 | 0.7098  | 0 | 2  | 78      | 1 | K.FVADGVFYAELNEFFQR.E                                                                                                      |
| <a href="#">10347</a> | 693.5249  | 2077.5527 | 2078.0691 | -0.5164 | 2 | 3  | 65      | 2 | K.VQNRGLSAVAQCESLRYK.L                                                                                                     |

89. [gi|220700805|gb|EED57143.1|](#) Mass: 58365 Score: 287 Queries matched: 23 emPAI: 0.32

acetyl-coA hydrolase Ach1, putative [Aspergillus flavus NRRL3357]

| Query                 | Observed  | Mr(expt)  | Mr(calc)  | Delta   | Miss | Score | Expect  | Rank | Peptide                                                                                                             |
|-----------------------|-----------|-----------|-----------|---------|------|-------|---------|------|---------------------------------------------------------------------------------------------------------------------|
| <a href="#">259</a>   | 408.4841  | 814.9537  | 813.4457  | 1.5080  | 1    | 10    | 18      | 5    | R.GLSPRER.A <a href="#">257</a>                                                                                     |
| <a href="#">817</a>   | 493.8641  | 985.7137  | 985.4651  | 0.2486  | 0    | 10    | 17      | 7    | K.MHQNLAEK.G <a href="#">820</a>                                                                                    |
| <a href="#">1912</a>  | 602.8091  | 1203.6037 | 1203.6182 | -0.0145 | 1    | 2     | 1.2e+02 | 10   | R.WARLNMIER.R                                                                                                       |
| <a href="#">2692</a>  | 652.2681  | 1302.5217 | 1301.6980 | 0.8238  | 0    | 29    | 0.22    | 1    | R.IGTPHIPVDPEK.V <a href="#">2676</a>                                                                               |
| <a href="#">3091</a>  | 450.3429  | 1348.0067 | 1349.6762 | -1.6694 | 0    | 7     | 30      | 2    | R.MLNLGGSADFLR.S <a href="#">3093</a>                                                                               |
| <a href="#">3123</a>  | 676.3916  | 1350.7687 | 1348.7575 | 2.0112  | 2    | 4     | 59      | 2    | R.RSPHQVGKEIAK.G <a href="#">3088</a>                                                                               |
| <a href="#">3181</a>  | 679.5276  | 1357.0407 | 1356.6997 | 0.3410  | 0    | 66    | 4.3e-05 | 1    | R.SQQVSNSPEIIR.R                                                                                                    |
| <a href="#">4700</a>  | 510.3142  | 1527.9207 | 1526.8569 | 1.0639  | 1    | 8     | 22      | 3    | R.RKPYLILQPEDR.I                                                                                                    |
| <a href="#">12584</a> | 800.1282  | 2397.3627 | 2395.2035 | 2.1593  | 0    | 57    | 0.00023 | 1    | K.HLSMFPSDLVYGWYTLNPK.N <a href="#">12568</a> <a href="#">12588</a>                                                 |
| <a href="#">13259</a> | 1245.0406 | 2488.0667 | 2486.4220 | 1.6447  | 0    | 89    | 1.4e-07 | 1    | R.LPQNLLPIQSGIGNIANAVIGGLSK.G <a href="#">13257</a> <a href="#">13266</a> <a href="#">13267</a> <a href="#">132</a> |
| <a href="#">16123</a> | 1106.2262 | 3315.6567 | 3313.6812 | 1.9755  | 2    | 4     | 38      | 3    | K.LAKAEDLIEFFPHGSYIGWSGFTGVGYPKK.V                                                                                  |
| <a href="#">16300</a> | 1141.8959 | 3422.6657 | 3422.7491 | -0.0833 | 0    | 1     | 72      | 6    | R.LDVAVIEASAITEDGGIIPGASV GASPELVQMDK.V                                                                             |

90. [gi|220701506|gb|EED57844.1|](#) Mass: 52230 Score: 282 Queries matched: 30 emPAI: 0.44

serine hydroxymethyltransferase, putative [Aspergillus flavus NRRL3357]

| Query                | Observed | Mr(expt)  | Mr(calc)  | Delta  | Miss | Score | Expect  | Rank | Peptide                                |
|----------------------|----------|-----------|-----------|--------|------|-------|---------|------|----------------------------------------|
| <a href="#">548</a>  | 912.9320 | 911.9247  | 911.3695  | 0.5552 | 0    | 1     | 1.1e+02 | 7    | R.GMGEEDFK.R                           |
| <a href="#">702</a>  | 482.5226 | 963.0307  | 962.4709  | 0.5598 | 0    | 20    | 1.9     | 1    | K.QVDTPEFK.Q <a href="#">703</a>       |
| <a href="#">2928</a> | 444.2385 | 1329.6937 | 1326.7772 | 2.9166 | 2    | 2     | 1e+02   | 10   | K.RIAHYIDKAIK.I                        |
| <a href="#">2954</a> | 667.5561 | 1333.0977 | 1332.6786 | 0.4191 | 0    | 5     | 58      | 6    | K.QYQQQLNNAK.A                         |
| <a href="#">3619</a> | 701.7361 | 1401.4577 | 1400.7340 | 0.7237 | 0    | 9     | 19      | 1    | K.EIAAWASTFPLPV.- <a href="#">3628</a> |



|                       |                 |                  |                  |                |          |             |                |          |                                                                                                                            |
|-----------------------|-----------------|------------------|------------------|----------------|----------|-------------|----------------|----------|----------------------------------------------------------------------------------------------------------------------------|
| <a href="#">3855</a>  | <b>716.7251</b> | <b>1431.4357</b> | <b>1430.7617</b> | <b>0.6741</b>  | <b>0</b> | <b>63</b>   | <b>8.4e-05</b> | <b>1</b> | <b>K.VASETVSDILELR.K</b>                                                                                                   |
| <a href="#">5463</a>  | 801.2826        | 1600.5507        | 1599.8290        | 0.7217         | 0        | 13          | 7.5            | 2        | R.VEAVLEQINIACNK.N <a href="#">5470</a>                                                                                    |
| <a href="#">6510</a>  | <b>841.1291</b> | <b>1680.2437</b> | <b>1679.8195</b> | <b>0.4242</b>  | <b>0</b> | <b>79</b>   | <b>1.8e-06</b> | <b>1</b> | <b>K.ISAVSTYFETFPYR.V</b> <a href="#">6506</a> <a href="#">6534</a> <a href="#">6572</a>                                   |
| <a href="#">6838</a>  | <b>852.2506</b> | <b>1702.4867</b> | <b>1701.8495</b> | <b>0.6373</b>  | <b>0</b> | <b>61</b>   | <b>0.00011</b> | <b>1</b> | <b>K.TLVESDPEIAQIMEK.E</b> <a href="#">6835</a>                                                                            |
| <a href="#">7016</a>  | <b>860.2046</b> | <b>1718.3947</b> | <b>1717.8444</b> | <b>0.5503</b>  | <b>0</b> | <b>(60)</b> | <b>0.00015</b> | <b>1</b> | <b>K.TLVESDPEIAQIMEK.E</b> <a href="#">7012</a>                                                                            |
| <a href="#">9493</a>  | 992.2211        | 1982.4277        | 1981.9350        | 0.4928         | 2        | 4           | 54             | 3        | R.IGAPAMTTRGMGEEDFKR.I <a href="#">9487</a> <a href="#">9494</a>                                                           |
| <a href="#">11634</a> | <b>753.6309</b> | <b>2257.8707</b> | <b>2256.1222</b> | <b>1.7485</b>  | <b>0</b> | <b>(3)</b>  | <b>66</b>      | <b>1</b> | <b>R.LMGLDLPHGGHLSHGYQTPAR.K</b>                                                                                           |
| <a href="#">11737</a> | <b>759.3292</b> | <b>2274.9657</b> | <b>2272.1171</b> | <b>2.8486</b>  | <b>0</b> | <b>25</b>   | <b>0.43</b>    | <b>1</b> | <b>R.LMGLDLPHGGHLSHGYQTPAR.K</b>                                                                                           |
| <a href="#">13995</a> | <b>869.6545</b> | <b>2605.9417</b> | <b>2606.3227</b> | <b>-0.3810</b> | <b>0</b> | <b>32</b>   | <b>0.065</b>   | <b>1</b> | <b>R.VNLETGIIDYDALEANAELYRPK.C</b> <a href="#">14001</a> <a href="#">14002</a> <a href="#">14007</a> <a href="#">14008</a> |
| <a href="#">14834</a> | 922.7262        | 2765.1567        | 2765.3299        | -0.1732        | 2        | 2           | 73             | 8        | K.SALTPCGIRIGAPAMTTRGMGEEDFK.R <a href="#">14835</a>                                                                       |

91. [gi|220697596|gb|EED53937.1|](#) Mass: 14407 Score: 273 Queries matched: 10 emPAI: 0.89

ubiquinol-cytochrome c reductase complex 14 kDa protein [Aspergillus flavus NRRL3357]

| Query                 | Observed        | Mr(expt)         | Mr(calc)         | Delta          | Miss     | Score     | Expect         | Rank     | Peptide                                           |
|-----------------------|-----------------|------------------|------------------|----------------|----------|-----------|----------------|----------|---------------------------------------------------|
| <a href="#">687</a>   | <b>480.5211</b> | <b>959.0277</b>  | <b>958.5335</b>  | <b>0.4942</b>  | <b>0</b> | <b>59</b> | <b>0.00027</b> | <b>1</b> | <b>R.ADLDSLIVK.R</b> <a href="#">688</a>          |
| <a href="#">2158</a>  | <b>623.1881</b> | <b>1244.3617</b> | <b>1243.6772</b> | <b>0.6845</b>  | <b>1</b> | <b>5</b>  | <b>57</b>      | <b>2</b> | <b>K.ERADLDSLIVK.R</b>                            |
| <a href="#">8415</a>  | <b>929.3481</b> | <b>1856.6817</b> | <b>1855.9415</b> | <b>0.7403</b>  | <b>0</b> | <b>84</b> | <b>6.1e-07</b> | <b>1</b> | <b>K.ADDLIPEESEVVQTAIK.R</b> <a href="#">8414</a> |
| <a href="#">9196</a>  | <b>973.8201</b> | <b>1945.6257</b> | <b>1944.8651</b> | <b>0.7606</b>  | <b>0</b> | <b>80</b> | <b>1.3e-06</b> | <b>1</b> | <b>R.WMMPIANWYTDAAGYR.R</b> <a href="#">9197</a>  |
| <a href="#">9344</a>  | 982.7986        | 1963.5827        | 1960.8600        | 2.7227         | 0        | (14)      | 5              | 2        | R.WMMPIANWYTDAAGYR.R <a href="#">9340</a>         |
| <a href="#">11709</a> | <b>758.1139</b> | <b>2271.3197</b> | <b>2273.0622</b> | <b>-1.7425</b> | <b>2</b> | <b>4</b>  | <b>50</b>      | <b>2</b> | <b>K.RWMMPIANWYTDAAGYRR.L</b>                     |

92. [gi|220699315|gb|EED55654.1|](#) Mass: 33949 Score: 262 Queries matched: 14 emPAI: 0.45

60S ribosomal protein L15, putative [Aspergillus flavus NRRL3357]

| Query                | Observed        | Mr(expt)         | Mr(calc)         | Delta          | Miss     | Score     | Expect         | Rank     | Peptide                                                         |
|----------------------|-----------------|------------------|------------------|----------------|----------|-----------|----------------|----------|-----------------------------------------------------------------|
| <a href="#">2236</a> | <b>627.7271</b> | <b>1253.4397</b> | <b>1253.6339</b> | <b>-0.1942</b> | <b>0</b> | <b>22</b> | <b>0.87</b>    | <b>1</b> | <b>R.INWICNAVHK.V</b> <a href="#">2233</a> <a href="#">2249</a> |
| <a href="#">3658</a> | 470.1829        | 1407.5267        | 1407.8099        | -0.2832        | 2        | 2         | 93             | 10       | K.QGYVVYRIRVR.R                                                 |
| <a href="#">4360</a> | <b>745.3891</b> | <b>1488.7637</b> | <b>1486.7820</b> | <b>1.9817</b>  | <b>0</b> | <b>31</b> | <b>0.14</b>    | <b>1</b> | <b>K.YFEVILVDPQHK.A</b> <a href="#">4349</a>                    |
| <a href="#">6094</a> | 550.6922        | 1649.0547        | 1649.7872        | -0.7324        | 1        | 11        | 13             | 2        | K.TRFYDYILEMGAR.I <a href="#">6093</a>                          |
| <a href="#">6658</a> | <b>845.4381</b> | <b>1688.8617</b> | <b>1688.8846</b> | <b>-0.0228</b> | <b>0</b> | <b>81</b> | <b>1.1e-06</b> | <b>1</b> | <b>K.GATYGKPTNQGINK.Y</b> <a href="#">6665</a>                  |
| <a href="#">7121</a> | 866.2731        | 1730.5317        | 1729.8311        | 0.7006         | 0        | 88        | 2.3e-07        | 1        | R.VLNSYWINQDSTYK.Y <a href="#">7108</a> <a href="#">7127</a>    |
| <a href="#">8843</a> | <b>952.0456</b> | <b>1902.0767</b> | <b>1900.9854</b> | <b>1.0913</b>  | <b>1</b> | <b>0</b>  | <b>1.4e+02</b> | <b>1</b> | <b>R.LAAATPGSSTPRATGDTVK.R</b>                                  |

93. [gi|220699334|gb|EED55673.1|](#) Mass: 28662 Score: 260 Queries matched: 26 emPAI: 0.93

Ribosomal L18ae protein family [Aspergillus flavus NRRL3357]

| Query                | Observed        | Mr(expt)         | Mr(calc)         | Delta         | Miss     | Score     | Expect         | Rank     | Peptide                                                                                                  |
|----------------------|-----------------|------------------|------------------|---------------|----------|-----------|----------------|----------|----------------------------------------------------------------------------------------------------------|
| <a href="#">562</a>  | <b>457.9776</b> | <b>913.9407</b>  | <b>913.5385</b>  | <b>0.4022</b> | <b>0</b> | <b>60</b> | <b>0.00017</b> | <b>1</b> | <b>R.FGSIHILK.V</b> <a href="#">564</a>                                                                  |
| <a href="#">1149</a> | <b>530.6971</b> | <b>1059.3797</b> | <b>1058.6124</b> | <b>0.7673</b> | <b>0</b> | <b>38</b> | <b>0.032</b>   | <b>1</b> | <b>R.IFAPNTTVAK.S</b> <a href="#">1142</a> <a href="#">1147</a> <a href="#">1156</a>                     |
| <a href="#">1248</a> | <b>540.5811</b> | <b>1079.1477</b> | <b>1077.5818</b> | <b>1.5659</b> | <b>0</b> | <b>78</b> | <b>2.8e-06</b> | <b>1</b> | <b>R.LTEYQVIGR.H</b> <a href="#">1233</a> <a href="#">1241</a> <a href="#">1242</a> <a href="#">1243</a> |
| <a href="#">1912</a> | 602.8091        | 1203.6037        | 1203.6248        | -0.0210       | 0        | 42        | 0.011          | 1        | R.HLPTEANPTPK.L <a href="#">1917</a>                                                                     |

|                      |                          |                           |                           |                         |                   |                    |                         |                   |                                       |                      |                      |                      |
|----------------------|--------------------------|---------------------------|---------------------------|-------------------------|-------------------|--------------------|-------------------------|-------------------|---------------------------------------|----------------------|----------------------|----------------------|
| <a href="#">1994</a> | <a href="#">609.6351</a> | <a href="#">1217.2557</a> | <a href="#">1215.6095</a> | <a href="#">1.6462</a>  | <a href="#">0</a> | <a href="#">77</a> | <a href="#">3.3e-06</a> | <a href="#">1</a> | <a href="#">K.VVEVDNADSIR.R</a>       | <a href="#">1983</a> | <a href="#">1986</a> | <a href="#">1991</a> |
| <a href="#">2424</a> | <a href="#">638.2766</a> | <a href="#">1274.5387</a> | <a href="#">1272.6655</a> | <a href="#">1.8732</a>  | <a href="#">0</a> | <a href="#">21</a> | <a href="#">1.4</a>     | <a href="#">2</a> | <a href="#">R.FWYFLTQLR.K</a>         | <a href="#">2400</a> | <a href="#">2425</a> |                      |
| <a href="#">3240</a> | <a href="#">681.7616</a> | <a href="#">1361.5087</a> | <a href="#">1361.7489</a> | <a href="#">-0.2402</a> | <a href="#">1</a> | <a href="#">3</a>  | <a href="#">80</a>      | <a href="#">5</a> | <a href="#">R.MRIFAPNTVVAK.S</a>      |                      |                      |                      |
| <a href="#">4240</a> | <a href="#">738.5156</a> | <a href="#">1475.0167</a> | <a href="#">1473.6307</a> | <a href="#">1.3861</a>  | <a href="#">1</a> | <a href="#">4</a>  | <a href="#">66</a>      | <a href="#">1</a> | <a href="#">R.YDSRSGTHNMYK.E</a>      |                      |                      |                      |
| <a href="#">4327</a> | <a href="#">743.3076</a> | <a href="#">1484.6007</a> | <a href="#">1481.8089</a> | <a href="#">2.7918</a>  | <a href="#">0</a> | <a href="#">6</a>  | <a href="#">43</a>      | <a href="#">1</a> | <a href="#">K.ANGEIVSLNVIPEK.R</a>    |                      |                      |                      |
| <a href="#">5248</a> | <a href="#">528.1865</a> | <a href="#">1581.5377</a> | <a href="#">1582.7297</a> | <a href="#">-1.1920</a> | <a href="#">0</a> | <a href="#">7</a>  | <a href="#">28</a>      | <a href="#">2</a> | <a href="#">R.TEAVEALYQDMAAR.H</a>    |                      |                      |                      |
| <a href="#">6131</a> | <a href="#">826.8116</a> | <a href="#">1651.6087</a> | <a href="#">1652.8787</a> | <a href="#">-1.2700</a> | <a href="#">2</a> | <a href="#">0</a>  | <a href="#">1.3e+02</a> | <a href="#">3</a> | <a href="#">K.VKNFGIWIRYDSR.S</a>     |                      |                      |                      |
| <a href="#">8234</a> | <a href="#">614.1739</a> | <a href="#">1839.4997</a> | <a href="#">1837.0673</a> | <a href="#">2.4325</a>  | <a href="#">2</a> | <a href="#">8</a>  | <a href="#">21</a>      | <a href="#">8</a> | <a href="#">K.VKKANGEIVSLNVIPEK.R</a> |                      |                      |                      |

94. [gi|220692437|gb|EED48784.1|](#) Mass: 54626 Score: 258 Queries matched: 21 emPAI: 0.42

hexokinase Kxk, putative [Aspergillus flavus NRRL3357]

| Query                 | Observed                  | Mr(expt)                  | Mr(calc)                  | Delta                   | Miss              | Score                | Expect                  | Rank               | Peptide                                          |                       |
|-----------------------|---------------------------|---------------------------|---------------------------|-------------------------|-------------------|----------------------|-------------------------|--------------------|--------------------------------------------------|-----------------------|
| <a href="#">526</a>   | <a href="#">454.6286</a>  | <a href="#">907.2427</a>  | <a href="#">906.4811</a>  | <a href="#">0.7617</a>  | <a href="#">0</a> | <a href="#">28</a>   | <a href="#">0.25</a>    | <a href="#">1</a>  | <a href="#">K.YDIIIDR.D</a>                      |                       |
| <a href="#">2002</a>  | <a href="#">1219.5550</a> | <a href="#">1218.5477</a> | <a href="#">1217.6074</a> | <a href="#">0.9403</a>  | <a href="#">0</a> | <a href="#">(17)</a> | <a href="#">3.6</a>     | <a href="#">1</a>  | <a href="#">K.ATQQELEMIR.R</a>                   |                       |
| <a href="#">2087</a>  | <a href="#">618.1966</a>  | <a href="#">1234.3787</a> | <a href="#">1233.6023</a> | <a href="#">0.7764</a>  | <a href="#">0</a> | <a href="#">37</a>   | <a href="#">0.037</a>   | <a href="#">1</a>  | <a href="#">K.ATQQELEMIR.R</a>                   |                       |
| <a href="#">2527</a>  | <a href="#">643.5826</a>  | <a href="#">1285.1507</a> | <a href="#">1284.6462</a> | <a href="#">0.5045</a>  | <a href="#">1</a> | <a href="#">6</a>    | <a href="#">36</a>      | <a href="#">4</a>  | <a href="#">K.GAFDITQSKYR.M</a>                  |                       |
| <a href="#">3489</a>  | <a href="#">694.8071</a>  | <a href="#">1387.5997</a> | <a href="#">1385.7013</a> | <a href="#">1.8984</a>  | <a href="#">0</a> | <a href="#">29</a>   | <a href="#">0.22</a>    | <a href="#">1</a>  | <a href="#">K.MTAGLYLGEIFR.L</a>                 |                       |
| <a href="#">6609</a>  | <a href="#">843.7926</a>  | <a href="#">1685.5707</a> | <a href="#">1685.9134</a> | <a href="#">-0.3427</a> | <a href="#">1</a> | <a href="#">(2)</a>  | <a href="#">92</a>      | <a href="#">10</a> | <a href="#">K.LNIKATQQELEMIR.R</a>               | <a href="#">6630</a>  |
| <a href="#">6865</a>  | <a href="#">853.1851</a>  | <a href="#">1704.3557</a> | <a href="#">1701.9083</a> | <a href="#">2.4474</a>  | <a href="#">1</a> | <a href="#">3</a>    | <a href="#">79</a>      | <a href="#">8</a>  | <a href="#">K.LNIKATQQELEMIR.R</a>               |                       |
| <a href="#">11036</a> | <a href="#">724.7319</a>  | <a href="#">2171.1737</a> | <a href="#">2169.2079</a> | <a href="#">1.9659</a>  | <a href="#">0</a> | <a href="#">1</a>    | <a href="#">1.2e+02</a> | <a href="#">6</a>  | <a href="#">K.VVIMAAEDGSGVGAALIAALTLK.R</a>      |                       |
| <a href="#">11323</a> | <a href="#">1106.5436</a> | <a href="#">2211.0727</a> | <a href="#">2210.1471</a> | <a href="#">0.9256</a>  | <a href="#">0</a> | <a href="#">64</a>   | <a href="#">4.9e-05</a> | <a href="#">1</a>  | <a href="#">K.GFDIDGVEGQDVVPPLEAILK.K</a>        | <a href="#">11331</a> |
| <a href="#">11575</a> | <a href="#">750.4735</a>  | <a href="#">2248.3987</a> | <a href="#">2247.1284</a> | <a href="#">1.2704</a>  | <a href="#">1</a> | <a href="#">6</a>    | <a href="#">32</a>      | <a href="#">9</a>  | <a href="#">K.YDIIIDRDSRPGQAFEK.M</a>            |                       |
| <a href="#">12122</a> | <a href="#">775.4849</a>  | <a href="#">2323.4327</a> | <a href="#">2325.3090</a> | <a href="#">-1.8762</a> | <a href="#">1</a> | <a href="#">10</a>   | <a href="#">12</a>      | <a href="#">1</a>  | <a href="#">K.VVIMAAEDGSGVGAALIAALTLKR.V</a>     | <a href="#">12127</a> |
| <a href="#">13838</a> | <a href="#">857.2332</a>  | <a href="#">2568.6777</a> | <a href="#">2568.4673</a> | <a href="#">0.2105</a>  | <a href="#">2</a> | <a href="#">1</a>    | <a href="#">92</a>      | <a href="#">2</a>  | <a href="#">K.VVIMAAEDGSGVGAALIAALTLKR.VK.A</a>  |                       |
| <a href="#">13930</a> | <a href="#">863.2615</a>  | <a href="#">2586.7627</a> | <a href="#">2584.4258</a> | <a href="#">2.3369</a>  | <a href="#">2</a> | <a href="#">1</a>    | <a href="#">81</a>      | <a href="#">5</a>  | <a href="#">K.DKVVIMAAEDGSGVGAALIAALTLKR.V</a>   |                       |
| <a href="#">14243</a> | <a href="#">885.2109</a>  | <a href="#">2652.6107</a> | <a href="#">2651.3384</a> | <a href="#">1.2723</a>  | <a href="#">0</a> | <a href="#">73</a>   | <a href="#">6.4e-06</a> | <a href="#">1</a>  | <a href="#">K.LPLGFTFSYPATQEYIDHGVLQR.W</a>      | <a href="#">14252</a> |
| <a href="#">14547</a> | <a href="#">900.3149</a>  | <a href="#">2697.9227</a> | <a href="#">2696.4861</a> | <a href="#">1.4366</a>  | <a href="#">0</a> | <a href="#">78</a>   | <a href="#">1.7e-06</a> | <a href="#">1</a>  | <a href="#">R.LALLDLLETRPGLIFQGQDTSQLR.K</a>     | <a href="#">14549</a> |
| <a href="#">15812</a> | <a href="#">1052.3135</a> | <a href="#">3153.9187</a> | <a href="#">3152.5311</a> | <a href="#">1.3876</a>  | <a href="#">0</a> | <a href="#">24</a>   | <a href="#">0.34</a>    | <a href="#">1</a>  | <a href="#">K.NLPPDMPVAINCEYGAFDNEHVVLPLTK.Y</a> |                       |

95. [gi|220699731|gb|EED56070.1|](#) Mass: 23272 Score: 257 Queries matched: 20 emPAI: 0.96

Mn superoxide dismutase MnSOD [Aspergillus flavus NRRL3357]

| Query                 | Observed                  | Mr(expt)                  | Mr(calc)                  | Delta                  | Miss              | Score              | Expect                  | Rank              | Peptide                                  |                       |                       |                       |                       |
|-----------------------|---------------------------|---------------------------|---------------------------|------------------------|-------------------|--------------------|-------------------------|-------------------|------------------------------------------|-----------------------|-----------------------|-----------------------|-----------------------|
| <a href="#">216</a>   | <a href="#">789.4940</a>  | <a href="#">788.4867</a>  | <a href="#">788.4644</a>  | <a href="#">0.0224</a> | <a href="#">0</a> | <a href="#">33</a> | <a href="#">0.12</a>    | <a href="#">1</a> | <a href="#">K.LEIVSTK.D</a>              | <a href="#">214</a>   | <a href="#">222</a>   |                       |                       |
| <a href="#">835</a>   | <a href="#">495.1251</a>  | <a href="#">988.2357</a>  | <a href="#">986.5396</a>  | <a href="#">1.6961</a> | <a href="#">0</a> | <a href="#">26</a> | <a href="#">0.45</a>    | <a href="#">1</a> | <a href="#">K.NGVEGSALLK.L</a>           | <a href="#">825</a>   | <a href="#">828</a>   | <a href="#">833</a>   |                       |
| <a href="#">1108</a>  | <a href="#">527.1006</a>  | <a href="#">1052.1867</a> | <a href="#">1051.5338</a> | <a href="#">0.6529</a> | <a href="#">0</a> | <a href="#">43</a> | <a href="#">0.0085</a>  | <a href="#">1</a> | <a href="#">K.ASYVEGIWK.V</a>            | <a href="#">1115</a>  |                       |                       |                       |
| <a href="#">2344</a>  | <a href="#">633.7166</a>  | <a href="#">1265.4187</a> | <a href="#">1264.6299</a> | <a href="#">0.7888</a> | <a href="#">0</a> | <a href="#">88</a> | <a href="#">2.5e-07</a> | <a href="#">1</a> | <a href="#">K.AAIEAQYGSVEK.F</a>         | <a href="#">2331</a>  | <a href="#">2340</a>  | <a href="#">2341</a>  |                       |
| <a href="#">5643</a>  | <a href="#">807.8811</a>  | <a href="#">1613.7477</a> | <a href="#">1612.7899</a> | <a href="#">0.9578</a> | <a href="#">0</a> | <a href="#">2</a>  | <a href="#">87</a>      | <a href="#">3</a> | <a href="#">K.FNGGGHINHSLEFWK.N</a>      |                       |                       |                       |                       |
| <a href="#">8405</a>  | <a href="#">619.6589</a>  | <a href="#">1855.9547</a> | <a href="#">1853.9689</a> | <a href="#">1.9858</a> | <a href="#">1</a> | <a href="#">2</a>  | <a href="#">95</a>      | <a href="#">5</a> | <a href="#">K.IKFNGGGHINHSLEFWK.N</a>    |                       |                       |                       |                       |
| <a href="#">10423</a> | <a href="#">1044.3191</a> | <a href="#">2086.6237</a> | <a href="#">2085.0854</a> | <a href="#">1.5383</a> | <a href="#">0</a> | <a href="#">62</a> | <a href="#">7.7e-05</a> | <a href="#">1</a> | <a href="#">K.NLAPHASPETNIDQAAPVLK.A</a> | <a href="#">10413</a> | <a href="#">10418</a> | <a href="#">10420</a> | <a href="#">10422</a> |

| Query                                                                                                                                                                                                                          | Observed  | Mr(expt)  | Mr(calc)  | Delta   | Miss | Score | Expect  | Rank | Peptide                                                                      |
|--------------------------------------------------------------------------------------------------------------------------------------------------------------------------------------------------------------------------------|-----------|-----------|-----------|---------|------|-------|---------|------|------------------------------------------------------------------------------|
| 96. <a href="#">gi 220693932 gb EED50277.1 </a> <b>Mass:</b> 56506 <b>Score:</b> 257 <b>Queries matched:</b> 28 <b>emPAI:</b> 0.33<br>UTP-glucose-1-phosphate uridylyltransferase Ugp1, putative [Aspergillus flavus NRRL3357] |           |           |           |         |      |       |         |      |                                                                              |
| <a href="#">86</a>                                                                                                                                                                                                             | 704.5610  | 703.5537  | 701.4072  | 2.1465  | 0    | 8     | 36      | 5    | K.SVIEVR.E                                                                   |
| <a href="#">273</a>                                                                                                                                                                                                            | 410.5556  | 819.0967  | 818.4763  | 0.6205  | 0    | 12    | 13      | 1    | K.HIPSIPR.I                                                                  |
| <a href="#">923</a>                                                                                                                                                                                                            | 506.0506  | 1010.0867 | 1009.6172 | 0.4696  | 0    | 46    | 0.0042  | 1    | R.LLEIAQVPK.E <a href="#">925</a>                                            |
| <a href="#">1092</a>                                                                                                                                                                                                           | 525.3256  | 1048.6367 | 1047.5634 | 1.0733  | 0    | 27    | 0.36    | 1    | K.TCSDLLLVK.S <a href="#">1087</a> <a href="#">1090</a> <a href="#">1091</a> |
| <a href="#">2114</a>                                                                                                                                                                                                           | 619.6586  | 1237.3027 | 1236.7554 | 0.5474  | 1    | 5     | 48      | 3    | K.ARLLEIAQVPK.E                                                              |
| <a href="#">4148</a>                                                                                                                                                                                                           | 488.9002  | 1463.6787 | 1464.7460 | -1.0673 | 1    | 5     | 47      | 5    | K.ADVKGGTIIDYEGK.A                                                           |
| <a href="#">4154</a>                                                                                                                                                                                                           | 733.2316  | 1464.4487 | 1462.6909 | 1.7579  | 0    | 4     | 60      | 1    | K.LNGGLGTSMGCVGPK.S                                                          |
| <a href="#">5031</a>                                                                                                                                                                                                           | 780.7331  | 1559.4517 | 1557.7398 | 1.7119  | 0    | 51    | 0.0014  | 1    | K.YFNTNNIWMSLR.A <a href="#">5018</a>                                        |
| <a href="#">5909</a>                                                                                                                                                                                                           | 818.7666  | 1635.5187 | 1635.7392 | -0.2204 | 0    | (1)   | 1.2e+02 | 5    | R.FEAEMDNFFALFR.R                                                            |
| <a href="#">6128</a>                                                                                                                                                                                                           | 826.7936  | 1651.5727 | 1651.7341 | -0.1613 | 0    | 15    | 4.5     | 1    | R.FEAEMDNFFALFR.R                                                            |
| <a href="#">7762</a>                                                                                                                                                                                                           | 597.3822  | 1789.1247 | 1788.0332 | 1.0916  | 2    | 1     | 1.1e+02 | 8    | R.RFLPVKTCSDLLLVK.S                                                          |
| <a href="#">7800</a>                                                                                                                                                                                                           | 897.3716  | 1792.7287 | 1791.8403 | 0.8885  | 1    | 3     | 76      | 8    | K.RFEAEMDNFFALFR.R                                                           |
| <a href="#">8083</a>                                                                                                                                                                                                           | 607.6825  | 1820.0257 | 1820.0156 | 0.0101  | 0    | 6     | 34      | 6    | R.IVELDHLTITGAVNLGR.N <a href="#">8089</a>                                   |
| <a href="#">8326</a>                                                                                                                                                                                                           | 925.6796  | 1849.3447 | 1848.8981 | 0.4466  | 1    | 3     | 62      | 4    | K.FKYFNTNNIWMSLR.A                                                           |
| <a href="#">9017</a>                                                                                                                                                                                                           | 641.1762  | 1920.5067 | 1918.9650 | 1.5418  | 1    | 19    | 1.7     | 1    | K.KYQGHNV DILTFNQSR.Y                                                        |
| <a href="#">10440</a>                                                                                                                                                                                                          | 1045.9436 | 2089.8727 | 2089.0804 | 0.7924  | 1    | 114   | 5.4e-10 | 1    | K.KGDADQAIYQLETAVGAIR.H <a href="#">10446</a> <a href="#">10448</a>          |
| <a href="#">10962</a>                                                                                                                                                                                                          | 721.8565  | 2162.5477 | 2161.1142 | 1.4335  | 2    | 8     | 21      | 8    | K.FKYFNTNNIWMSLR.AIK.R                                                       |
| <a href="#">12137</a>                                                                                                                                                                                                          | 776.1942  | 2325.5607 | 2326.0708 | -0.5101 | 0    | 2     | 77      | 5    | R.ILQHMVDTESEYIMELTDK.T                                                      |
| <a href="#">15207</a>                                                                                                                                                                                                          | 958.8519  | 2873.5337 | 2871.4113 | 2.1224  | 0    | 3     | 50      | 1    | R.TFNVNVPFVLMNSFNTDQDTQSIK.K                                                 |
| <a href="#">15986</a>                                                                                                                                                                                                          | 1085.9675 | 3254.8807 | 3254.4833 | 0.3974  | 0    | 14    | 3.7     | 1    | K.SFDAPLQDWYPPGHGDVFESELYNSGTLDK.L                                           |
| 97. <a href="#">gi 220692491 gb EED48837.1 </a> <b>Mass:</b> 205077 <b>Score:</b> 257 <b>Queries matched:</b> 58 <b>emPAI:</b> 0.10<br>fatty acid synthase alpha subunit FasA [Aspergillus flavus NRRL3357]                    |           |           |           |         |      |       |         |      |                                                                              |
| Query                                                                                                                                                                                                                          | Observed  | Mr(expt)  | Mr(calc)  | Delta   | Miss | Score | Expect  | Rank | Peptide                                                                      |
| <a href="#">38</a>                                                                                                                                                                                                             | 672.4050  | 671.3977  | 669.3810  | 2.0168  | 0    | 14    | 7.8     | 4    | R.VVAEPR.A <a href="#">41</a>                                                |
| <a href="#">225</a>                                                                                                                                                                                                            | 791.5420  | 790.5347  | 789.3868  | 1.1479  | 0    | 14    | 7       | 1    | R.IGSEADAK.A                                                                 |
| <a href="#">278</a>                                                                                                                                                                                                            | 412.8446  | 823.6747  | 825.4821  | -1.8073 | 1    | 6     | 37      | 4    | K.RVVAEPR.A                                                                  |
| <a href="#">381</a>                                                                                                                                                                                                            | 430.1201  | 858.2257  | 859.3923  | -1.1666 | 0    | 19    | 2.6     | 6    | K.TGEPVDDK.D                                                                 |
| <a href="#">395</a>                                                                                                                                                                                                            | 432.7376  | 863.4607  | 863.4899  | -0.0291 | 1    | 9     | 22      | 6    | K.SLMTKLR.T                                                                  |
| <a href="#">661</a>                                                                                                                                                                                                            | 477.3661  | 952.7177  | 953.5004  | -0.7827 | 1    | 9     | 19      | 7    | R.YLKMDLR.A                                                                  |
| <a href="#">807</a>                                                                                                                                                                                                            | 492.7546  | 983.4947  | 983.5076  | -0.0129 | 0    | 10    | 13      | 1    | K.YLYAALDR.T                                                                 |
| <a href="#">909</a>                                                                                                                                                                                                            | 502.8981  | 1003.7817 | 1003.5121 | 0.2697  | 0    | 16    | 4.3     | 1    | R.EIVSQCIR.I                                                                 |
| <a href="#">972</a>                                                                                                                                                                                                            | 512.1531  | 1022.2917 | 1022.5185 | -0.2268 | 0    | 26    | 0.4     | 1    | K.VFLNPDYR.V <a href="#">977</a>                                             |
| <a href="#">995</a>                                                                                                                                                                                                            | 515.9291  | 1029.8437 | 1028.5906 | 1.2531  | 0    | 9     | 23      | 1    | K.FPSPLLDIK.Y <a href="#">993</a>                                            |
| <a href="#">1130</a>                                                                                                                                                                                                           | 1057.2290 | 1056.2217 | 1054.5883 | 1.6334  | 1    | 0     | 1.5e+02 | 10   | K.QDSRIAPLR.G                                                                |

|                       |                  |                  |                  |                |          |             |                |          |                                                                                                         |
|-----------------------|------------------|------------------|------------------|----------------|----------|-------------|----------------|----------|---------------------------------------------------------------------------------------------------------|
| <a href="#">1162</a>  | 532.6421         | 1063.2697        | 1061.5254        | 1.7443         | 0        | 7           | 33             | 5        | K.AASPOASFAGR.W                                                                                         |
| <a href="#">1298</a>  | 544.7511         | 1087.4877        | 1086.5822        | 0.9056         | 0        | 22          | 1.2            | 2        | K.YILEHSGIR.L <a href="#">1299</a>                                                                      |
| <a href="#">1708</a>  | <b>581.2081</b>  | <b>1160.4017</b> | <b>1161.5965</b> | <b>-1.1947</b> | <b>0</b> | <b>40</b>   | <b>0.02</b>    | <b>1</b> | <b>K.MPGGFNITAVR.K</b>                                                                                  |
| <a href="#">1795</a>  | 589.8866         | 1177.7587        | 1179.5441        | -1.7854        | 0        | 13          | 9.1            | 10       | R.TDIMETSDIR.Q <a href="#">1806</a>                                                                     |
| <a href="#">2945</a>  | <b>666.6601</b>  | <b>1331.3057</b> | <b>1331.6391</b> | <b>-0.3334</b> | <b>0</b> | <b>28</b>   | <b>0.26</b>    | <b>1</b> | <b>K.ELGEQLIENCK.E</b>                                                                                  |
| <a href="#">3033</a>  | 671.7071         | 1341.3997        | 1340.7089        | 0.6909         | 0        | 7           | 35             | 2        | R.LVAGQVPTGWDAR.R                                                                                       |
| <a href="#">3145</a>  | <b>677.6256</b>  | <b>1353.2367</b> | <b>1352.7412</b> | <b>0.4955</b>  | <b>0</b> | <b>40</b>   | <b>0.013</b>   | <b>1</b> | <b>R.SVPAPGGQVLTAR.E <a href="#">3148</a></b>                                                           |
| <a href="#">4802</a>  | 770.4031         | 1538.7917        | 1539.7893        | -0.9976        | 0        | 1           | 1.2e+02        | 7        | K.DVAIPTGPQTTVDAR.G                                                                                     |
| <a href="#">4961</a>  | 777.0546         | 1552.0947        | 1553.6780        | -1.5833        | 0        | 8           | 21             | 5        | K.QMAEGGPISEYSNR.A                                                                                      |
| <a href="#">6426</a>  | <b>558.8552</b>  | <b>1673.5437</b> | <b>1670.8774</b> | <b>2.6663</b>  | <b>1</b> | <b>8</b>    | <b>21</b>      | <b>3</b> | <b>R.IVEIGPADTLGGMARR.T</b>                                                                             |
| <a href="#">6696</a>  | <b>846.9241</b>  | <b>1691.8337</b> | <b>1690.8025</b> | <b>1.0312</b>  | <b>0</b> | <b>57</b>   | <b>0.00031</b> | <b>1</b> | <b>R.QDALSMYYDIFGR.L <a href="#">6713</a></b>                                                           |
| <a href="#">6892</a>  | 854.5736         | 1707.1327        | 1708.9108        | -1.7780        | 1        | 1           | 1.2e+02        | 2        | R.QVVESLAKAHAVENSK.V                                                                                    |
| <a href="#">6949</a>  | <b>571.5562</b>  | <b>1711.6467</b> | <b>1712.9131</b> | <b>-1.2664</b> | <b>0</b> | <b>5</b>    | <b>48</b>      | <b>2</b> | <b>R.QDGVLLLLALTMEPASR.I <a href="#">6961</a></b>                                                       |
| <a href="#">7597</a>  | <b>888.9276</b>  | <b>1775.8407</b> | <b>1772.9210</b> | <b>2.9197</b>  | <b>0</b> | <b>2</b>    | <b>92</b>      | <b>1</b> | <b>K.VVVVTGFAEVGPWGNSR.T</b>                                                                            |
| <a href="#">7974</a>  | 604.7735         | 1811.2987        | 1810.8638        | 0.4349         | 1        | 2           | 87             | 5        | R.QEKDAQFSLGNFWK.Q                                                                                      |
| <a href="#">8552</a>  | 625.3582         | 1873.0527        | 1872.9217        | 0.1310         | 1        | 4           | 50             | 10       | R.TLASKYEAYDAATSVQR.Q <a href="#">8559</a>                                                              |
| <a href="#">8711</a>  | 630.4502         | 1888.3287        | 1889.0556        | -0.7269        | 2        | 0           | 1.4e+02        | 3        | K.QQLEIIARYLKMDLR.A                                                                                     |
| <a href="#">9421</a>  | 659.1082         | 1974.3027        | 1975.9826        | -1.6798        | 1        | 4           | 49             | 4        | R.QDALSMYYDIFGR.LR.V                                                                                    |
| <a href="#">9891</a>  | <b>677.2719</b>  | <b>2028.7937</b> | <b>2030.0698</b> | <b>-1.2761</b> | <b>1</b> | <b>7</b>    | <b>23</b>      | <b>1</b> | <b>K.VVVVTGFAEVGPWGNSRTR.W <a href="#">9900</a> <a href="#">9907</a></b>                                |
| <a href="#">10427</a> | <b>1044.7756</b> | <b>2087.5367</b> | <b>2088.0456</b> | <b>-0.5089</b> | <b>1</b> | <b>1</b>    | <b>1.1e+02</b> | <b>1</b> | <b>R.GTGLMGGNNMVAEGVEKLGVR.T</b>                                                                        |
| <a href="#">11404</a> | 741.4625         | 2221.3657        | 2222.0889        | -0.7231        | 1        | 5           | 37             | 4        | R.GETYQLAKELGEQLIENCK.E                                                                                 |
| <a href="#">11735</a> | <b>759.3235</b>  | <b>2274.9487</b> | <b>2275.2114</b> | <b>-0.2626</b> | <b>1</b> | <b>5</b>    | <b>40</b>      | <b>3</b> | <b>K.AFSVTSFGFGQKGAQVIGIHPK.Y <a href="#">11730</a></b>                                                 |
| <a href="#">12408</a> | <b>791.4452</b>  | <b>2371.3137</b> | <b>2370.2577</b> | <b>1.0560</b>  | <b>0</b> | <b>78</b>   | <b>2e-06</b>   | <b>1</b> | <b>K.NVLMTGAGAGSIGAEVLQGLISGGAK.V <a href="#">12413</a></b>                                             |
| <a href="#">12518</a> | <b>796.6485</b>  | <b>2386.9237</b> | <b>2386.2526</b> | <b>0.6711</b>  | <b>0</b> | <b>(50)</b> | <b>0.0013</b>  | <b>1</b> | <b>K.NVLMTGAGAGSIGAEVLQGLISGGAK.V <a href="#">12521</a> <a href="#">12525</a> <a href="#">12526</a></b> |
| <a href="#">13124</a> | 824.6832         | 2471.0277        | 2472.1597        | -1.1320        | 2        | 3           | 63             | 10       | R.ALSMNNQIMPPENGNGKRSNR.S <a href="#">13135</a>                                                         |
| <a href="#">13691</a> | <b>850.0829</b>  | <b>2547.2267</b> | <b>2546.2952</b> | <b>0.9315</b>  | <b>1</b> | <b>4</b>    | <b>50</b>      | <b>1</b> | <b>K.GMVNLDKVVVVTGFAEVGPWGNSR.T</b>                                                                     |
| <a href="#">14988</a> | 935.8599         | 2804.5577        | 2802.3825        | 2.1752         | 0        | 2           | 74             | 2        | R.GALATWGLTVDDIGVASFHGTSVANDK.N                                                                         |
| <a href="#">15551</a> | 1016.3752        | 3046.1037        | 3046.4865        | -0.3828        | 2        | 3           | 48             | 3        | K.YVHLSEVGNICIGSGIGGTHALRGMKDR.Y                                                                        |
| <a href="#">15970</a> | 1083.4942        | 3247.4607        | 3245.5669        | 1.8938         | 0        | 1           | 68             | 2        | R.ALQAQIDLWQAEHGDFYASGIEPSFDPLK.A                                                                       |
| <a href="#">16194</a> | 1118.7202        | 3353.1387        | 3354.5649        | -1.4262        | 1        | 0           | 79             | 5        | R.SNPLLLDFMQYHIDNCPTDRGETYQLAK.E                                                                        |

98. [gi|220699092|gb|EED55431.1|](#) Mass: 55140 Score: 257 Queries matched: 24 emPAI: 0.50

NADH-ubiquinone oxidoreductase, subunit F, putative [Aspergillus flavus NRRL3357]

| Query                | Observed        | Mr(expt)         | Mr(calc)         | Delta          | Miss     | Score     | Expect         | Rank     | Peptide                       |
|----------------------|-----------------|------------------|------------------|----------------|----------|-----------|----------------|----------|-------------------------------|
| <a href="#">60</a>   | 684.6450        | 683.6377         | 684.3126         | -0.6749        | 0        | 3         | 59             | 7        | R.HCGGVR.G                    |
| <a href="#">72</a>   | 690.5210        | 689.5137         | 689.3708         | 0.1429         | 0        | 11        | 18             | 6        | K.STDIVR.A <a href="#">73</a> |
| <a href="#">1361</a> | 551.1846        | 1100.3547        | 1100.5040        | -0.1492        | 0        | 12        | 13             | 1        | R.GASWFSSFR.E                 |
| <a href="#">1510</a> | <b>563.7046</b> | <b>1125.3947</b> | <b>1125.5931</b> | <b>-0.1983</b> | <b>0</b> | <b>30</b> | <b>0.15</b>    | <b>1</b> | <b>R.HFRPELEAK.I</b>          |
| <a href="#">2253</a> | 629.2391        | 1256.4637        | 1256.6051        | -0.1413        | 1        | 1         | 1.4e+02        | 8        | R.RGASWFSSFR.E                |
| <a href="#">3099</a> | <b>675.2921</b> | <b>1348.5697</b> | <b>1347.7034</b> | <b>0.8663</b>  | <b>0</b> | <b>72</b> | <b>9.6e-06</b> | <b>1</b> | <b>R.AINEAYEAGLIGK.N</b>      |

|                       |           |           |           |         |   |      |         |   |                                                           |
|-----------------------|-----------|-----------|-----------|---------|---|------|---------|---|-----------------------------------------------------------|
| <a href="#">3319</a>  | 685.9826  | 1369.9507 | 1369.6812 | 0.2695  | 0 | 6    | 46      | 3 | R.AMNANAAYIYIR.G                                          |
| <a href="#">4025</a>  | 725.6956  | 1449.3767 | 1448.7048 | 0.6719  | 0 | 52   | 0.0011  | 1 | R.GEFYHEATVLQR.A <a href="#">4038</a>                     |
| <a href="#">4499</a>  | 754.0776  | 1506.1407 | 1503.7603 | 2.3805  | 1 | 3    | 79      | 3 | R.EREIDMLQELTK.Q                                          |
| <a href="#">4503</a>  | 754.2261  | 1506.4377 | 1506.7249 | -0.2872 | 1 | 5    | 51      | 5 | R.EGSKWTQQIMQR.M <a href="#">4493</a>                     |
| <a href="#">6144</a>  | 827.1736  | 1652.3327 | 1650.7559 | 1.5768  | 0 | 3    | 78      | 9 | R.YLVVNADEGEPGTCK.D                                       |
| <a href="#">10359</a> | 1040.3516 | 2078.6887 | 2077.1208 | 1.5679  | 0 | 40   | 0.011   | 1 | R.GGWDNLLAVIPGSSSTPVIK.S <a href="#">10360</a>            |
| <a href="#">10721</a> | 1066.0211 | 2130.0277 | 2128.9657 | 1.0621  | 0 | 86   | 3.2e-07 | 1 | R.GMGAYVCGEETSLIESIEGK.A <a href="#">10722</a>            |
| <a href="#">11893</a> | 765.9392  | 2294.7957 | 2293.1042 | 1.6915  | 2 | (0)  | 1.2e+02 | 8 | R.METGQAREREIDMLQELTK.Q                                   |
| <a href="#">11896</a> | 766.0475  | 2295.1207 | 2293.1042 | 2.0165  | 2 | 6    | 32      | 5 | R.METGQAREREIDMLQELTK.Q                                   |
| <a href="#">13830</a> | 856.7945  | 2567.3617 | 2565.3162 | 2.0455  | 0 | 25   | 0.36    | 1 | K.QVEGHTICALGEAFWPIQGLIR.H                                |
| <a href="#">16224</a> | 1124.7312 | 3371.1717 | 3369.7829 | 1.3888  | 0 | 38   | 0.014   | 1 | R.LKPPFPAAVGLFGCPSTVTNVETVAVPTIMR.R <a href="#">16226</a> |
| <a href="#">16250</a> | 1129.8895 | 3386.6467 | 3385.7778 | 0.8689  | 0 | (17) | 1.9     | 1 | R.LKPPFPAAVGLFGCPSTVTNVETVAVPTIMR.R                       |

99. [gi|220692461|gb|EED48808.1|](#) Mass: 56705 Score: 248 Queries matched: 23 emPAI: 0.66

protein disulfide isomerase Pdi1, putative [Aspergillus flavus NRRL3357]

| Query                 | Observed  | Mr(expt)  | Mr(calc)  | Delta   | Miss | Score | Expect  | Rank | Peptide                                                            |
|-----------------------|-----------|-----------|-----------|---------|------|-------|---------|------|--------------------------------------------------------------------|
| <a href="#">54</a>    | 683.3780  | 682.3707  | 682.4377  | -0.0670 | 0    | 10    | 10      | 4    | K.NIPLVK.V <a href="#">53</a>                                      |
| <a href="#">1544</a>  | 565.9746  | 1129.9347 | 1129.6343 | 0.3004  | 0    | 4     | 82      | 1    | K.GSINIVTIDAK.L                                                    |
| <a href="#">1590</a>  | 568.6766  | 1135.3387 | 1134.5921 | 0.7466  | 0    | 43    | 0.0082  | 1    | R.TVEDLANFVK.E                                                     |
| <a href="#">1926</a>  | 603.8866  | 1205.7587 | 1205.5928 | 0.1659  | 0    | 53    | 0.00076 | 1    | R.DQVVEGYPTLK.I <a href="#">1933</a>                               |
| <a href="#">2323</a>  | 632.7161  | 1263.4177 | 1261.6343 | 1.7834  | 0    | 42    | 0.0099  | 1    | K.FPAFAIQDPEK.N                                                    |
| <a href="#">2423</a>  | 638.2361  | 1274.4577 | 1273.6779 | 0.7799  | 0    | 31    | 0.13    | 1    | R.GLDAVKPYQGAR.Q <a href="#">2419</a>                              |
| <a href="#">6472</a>  | 839.4046  | 1676.7947 | 1677.8686 | -1.0739 | 2    | 3     | 66      | 3    | K.ENGKHKVDALEVDPK.K                                                |
| <a href="#">6671</a>  | 846.0321  | 1690.0497 | 1689.9315 | 0.1183  | 1    | 11    | 12      | 3    | K.IFRGLDAVKPYQGAR.Q                                                |
| <a href="#">7276</a>  | 873.6186  | 1745.2227 | 1744.9247 | 0.2980  | 1    | 82    | 9.7e-07 | 1    | K.FIQDVLDDKVEPSIK.S <a href="#">7293</a> <a href="#">7297</a>      |
| <a href="#">9146</a>  | 970.1611  | 1938.3077 | 1936.9418 | 1.3659  | 0    | 37    | 0.028   | 1    | K.ATYDGEIEQDALLSWVK.T <a href="#">9147</a>                         |
| <a href="#">9243</a>  | 651.4569  | 1951.3487 | 1950.0309 | 1.3178  | 0    | 4     | 63      | 3    | K.QSLPAVSPVTPENLEEIK.T                                             |
| <a href="#">11382</a> | 739.8375  | 2216.4907 | 2214.9979 | 1.4928  | 0    | 42    | 0.008   | 1    | K.EHDLVLAEFFAPWCGHCK.A <a href="#">11368</a> <a href="#">11387</a> |
| <a href="#">15026</a> | 941.4882  | 2821.4427 | 2820.3251 | 1.1176  | 1    | 58    | 0.00017 | 1    | K.DLVLDNEKDVLEFYAPWCGHCK.A                                         |
| <a href="#">15932</a> | 1073.8885 | 3218.6437 | 3215.6635 | 2.9802  | 1    | 1     | 77      | 1    | R.QTEAIVSYMVKQSLPAVSPVTPENLEEIK.T                                  |
| <a href="#">16324</a> | 1144.7462 | 3431.2167 | 3429.7595 | 1.4572  | 0    | 6     | 23      | 1    | K.TASTPLVDELGPETYSGYITAGIPLAYIFAETK.E                              |

100. [gi|220693825|gb|EED50170.1|](#) Mass: 43780 Score: 246 Queries matched: 16 emPAI: 0.24

GTP-binding protein YchF [Aspergillus flavus NRRL3357]

| Query                | Observed | Mr(expt)  | Mr(calc)  | Delta   | Miss | Score | Expect | Rank | Peptide                            |
|----------------------|----------|-----------|-----------|---------|------|-------|--------|------|------------------------------------|
| <a href="#">403</a>  | 865.5160 | 864.5087  | 864.4011  | 0.1076  | 0    | 15    | 5      | 1    | R.GGQSLEMK.K <a href="#">404</a>   |
| <a href="#">2068</a> | 616.4051 | 1230.7957 | 1231.6958 | -0.9001 | 1    | 3     | 93     | 2    | K.SALPKVIT <del>T</del> MR.T       |
| <a href="#">3845</a> | 716.4311 | 1430.8477 | 1428.7824 | 2.0653  | 1    | 15    | 5.7    | 1    | R.DLDIISEELRVK.D                   |
| <a href="#">7674</a> | 892.2816 | 1782.5487 | 1782.8822 | -0.3334 | 2    | 5     | 46     | 5    | R.EYGDEAAVKAAGKVM <del>T</del> K.G |

|                       |          |           |           |         |   |     |         |   |                                                                                                                                |
|-----------------------|----------|-----------|-----------|---------|---|-----|---------|---|--------------------------------------------------------------------------------------------------------------------------------|
| <a href="#">7719</a>  | 596.0702 | 1785.1887 | 1786.0135 | -0.8247 | 2 | 2   | 92      | 3 | K.NLNTKSALPKVITTM.R                                                                                                            |
| <a href="#">8058</a>  | 909.7796 | 1817.5447 | 1816.9683 | 0.5764  | 0 | 105 | 5e-09   | 1 | K.SQVPANLTVYDIAGLTR.G <a href="#">8050</a> <a href="#">8054</a> <a href="#">8057</a> <a href="#">8062</a> <a href="#">8066</a> |
| <a href="#">8162</a>  | 915.7941 | 1829.5737 | 1827.9003 | 1.6734  | 0 | 84  | 5.7e-07 | 1 | R.TSLNLSAFFTTGADEV.R <a href="#">8154</a>                                                                                      |
| <a href="#">9123</a>  | 968.7556 | 1935.4967 | 1934.8833 | 0.6135  | 0 | 53  | 0.00065 | 1 | K.NSPGDPIIPFSACFEER.L                                                                                                          |
| <a href="#">11071</a> | 726.4999 | 2176.4777 | 2175.0232 | 1.4545  | 0 | 2   | 85      | 6 | K.SNLGNPANFPYATIDPEEAR.V                                                                                                       |

101. [gi|220698459|gb|EED54799.1|](#) Mass: 32383 Score: 243 Queries matched: 27 emPAI: 0.98

40S ribosomal protein S0 [Aspergillus flavus NRRL3357]

| Query                 | Observed  | Mr(expt)  | Mr(calc)  | Delta   | Miss | Score | Expect  | Rank | Peptide                                                                                            |
|-----------------------|-----------|-----------|-----------|---------|------|-------|---------|------|----------------------------------------------------------------------------------------------------|
| <a href="#">31</a>    | 656.3770  | 655.3697  | 655.4381  | -0.0683 | 0    | 17    | 2.2     | 2    | K.ILLAAR.I <a href="#">32</a>                                                                      |
| <a href="#">595</a>   | 463.8621  | 925.7097  | 925.5597  | 0.1501  | 0    | 37    | 0.025   | 1    | R.LIIVTDPR.T <a href="#">606</a>                                                                   |
| <a href="#">3445</a>  | 692.1416  | 1382.2687 | 1381.7678 | 0.5010  | 0    | 18    | 2.3     | 1    | K.TRPDGVNVINIGK.T                                                                                  |
| <a href="#">3823</a>  | 715.8146  | 1429.6147 | 1429.6990 | -0.0843 | 0    | 49    | 0.0021  | 1    | R.FTPGNFTNYITR.S <a href="#">3854</a> <a href="#">3863</a> <a href="#">3864</a>                    |
| <a href="#">4179</a>  | 734.9661  | 1467.9177 | 1467.7809 | 0.1368  | 0    | 1     | 1.3e+02 | 8    | R.HSIGLVWMLAR.E                                                                                    |
| <a href="#">6787</a>  | 567.6119  | 1699.8137 | 1696.8984 | 2.9153  | 1    | 12    | 10      | 1    | K.GRHSIGLVWMLAR.E <a href="#">6752</a>                                                             |
| <a href="#">6865</a>  | 853.1851  | 1704.3557 | 1702.7533 | 1.6024  | 1    | 47    | 0.0029  | 1    | R.DPEAEENKEIADESK.V <a href="#">6851</a>                                                           |
| <a href="#">7813</a>  | 898.0391  | 1794.0637 | 1791.8944 | 2.1693  | 1    | 2     | 86      | 2    | R.FTPGNFTNYITRSFK.E <a href="#">7805</a>                                                           |
| <a href="#">8174</a>  | 916.7716  | 1831.5287 | 1830.8465 | 0.6823  | 0    | 63    | 7.3e-05 | 1    | R.ETEWDVVPDLYFYR.D <a href="#">8173</a>                                                            |
| <a href="#">9045</a>  | 642.7072  | 1925.0997 | 1926.0323 | -0.9326 | 1    | 2     | 78      | 8    | K.TRPDGVNVINIGKTWEK.I <a href="#">9038</a>                                                         |
| <a href="#">15894</a> | 1068.3385 | 3201.9937 | 3200.6288 | 1.3649  | 0    | 29    | 0.13    | 1    | M.APSQLPPIFNPTQDIEQLLAAQCHLGSK.N <a href="#">15891</a> <a href="#">15892</a> <a href="#">15896</a> |
| <a href="#">16241</a> | 1127.6335 | 3379.8787 | 3377.6337 | 2.2450  | 0    | 48    | 0.0013  | 1    | K.EASYVNIPVLALCDTDSPTDFVDVAIPTNNK.G <a href="#">16236</a> <a href="#">16238</a>                    |

102. [gi|220698200|gb|EED54540.1|](#) Mass: 39044 Score: 243 Queries matched: 15 emPAI: 0.50

spermidine synthase [Aspergillus flavus NRRL3357]

| Query                 | Observed  | Mr(expt)  | Mr(calc)  | Delta   | Miss | Score | Expect  | Rank | Peptide                                                                          |
|-----------------------|-----------|-----------|-----------|---------|------|-------|---------|------|----------------------------------------------------------------------------------|
| <a href="#">1484</a>  | 561.5856  | 1121.1567 | 1120.6029 | 0.5538  | 0    | 41    | 0.014   | 1    | R.ASFVLPNFAR.K <a href="#">1487</a>                                              |
| <a href="#">1950</a>  | 606.4181  | 1210.8217 | 1210.7034 | 0.1183  | 0    | 72    | 9.7e-06 | 1    | K.VLVIGGGDGGVLR.E <a href="#">1952</a> <a href="#">1956</a> <a href="#">1958</a> |
| <a href="#">2857</a>  | 441.9845  | 1322.9317 | 1324.6960 | -1.7642 | 2    | 8     | 25      | 7    | K.DANRNVREPVR.S                                                                  |
| <a href="#">4581</a>  | 759.4236  | 1516.8327 | 1514.8126 | 2.0201  | 1    | 63    | 7.5e-05 | 1    | K.KAILCDIDEAVIR.V <a href="#">4569</a>                                           |
| <a href="#">4898</a>  | 774.1546  | 1546.2947 | 1544.7260 | 1.5688  | 0    | 36    | 0.039   | 1    | K.THPTIQDGFSEK.S <a href="#">4859</a> <a href="#">4887</a> <a href="#">4901</a>  |
| <a href="#">6296</a>  | 833.0161  | 1664.0177 | 1665.9778 | -1.9601 | 1    | 1     | 1.2e+02 | 3    | K.VLVIGGGDGGVLRVVK.H                                                             |
| <a href="#">16369</a> | 1153.6715 | 3457.9927 | 3455.6773 | 2.3155  | 0    | 58    | 0.00015 | 1    | K.NEFDVVIITDSSDPEGPAESLFQKPYFELLR.D                                              |

103. [gi|220700955|gb|EED57293.1|](#) Mass: 14138 Score: 239 Queries matched: 16 emPAI: 3.55

60S ribosomal protein L22, putative [Aspergillus flavus NRRL3357]

| Query                | Observed | Mr(expt)  | Mr(calc)  | Delta   | Miss | Score | Expect | Rank | Peptide                                                                      |
|----------------------|----------|-----------|-----------|---------|------|-------|--------|------|------------------------------------------------------------------------------|
| <a href="#">125</a>  | 736.2080 | 735.2007  | 735.3915  | -0.1908 | 0    | 11    | 13     | 3    | K.GVYELR.F                                                                   |
| <a href="#">895</a>  | 501.6046 | 1001.1947 | 1000.5553 | 0.6394  | 0    | 46    | 0.0046 | 1    | K.VVISQVGDGK.I <a href="#">889</a> <a href="#">890</a> <a href="#">897</a>   |
| <a href="#">1198</a> | 535.5691 | 1069.1237 | 1068.5491 | 0.5746  | 0    | 46    | 0.0038 | 1    | K.IFDLSAFEK.F <a href="#">1192</a> <a href="#">1194</a> <a href="#">1199</a> |



[2709](#) **653.8121** **1305.6097** **1305.6565** **-0.0468** **0** **56** **0.00039** **1** **K.FTINASQPVSDK.I** [2720](#)  
[3038](#) **671.8121** **1341.6097** **1339.7248** **1.8849** **0** **49** **0.0019** **1** **K.IEVVSHIPFSGR.Y** [3015](#) [3023](#) [3026](#)  
[12132](#) 776.0495 2325.1267 2322.2696 2.8571 1 3 75 2 K.VVISQVGDGKIEVVSHIPFSGR.Y

104. [gi|220698263|gb|EED54603.1|](#) Mass: 99949 Score: 235 Queries matched: 36 emPAI: 0.17

glycogen phosphorylase GlpV/Gph1, putative [Aspergillus flavus NRRL3357]

| Query                 | Observed        | Mr(expt)         | Mr(calc)         | Delta          | Miss     | Score     | Expect         | Rank      | Peptide                                                                                               |
|-----------------------|-----------------|------------------|------------------|----------------|----------|-----------|----------------|-----------|-------------------------------------------------------------------------------------------------------|
| <a href="#">1403</a>  | 554.7316        | 1107.4487        | 1106.5390        | 0.9098         | 2        | 8         | 28             | 7         | K.SMSPEERKK.V                                                                                         |
| <a href="#">1443</a>  | 558.6411        | 1115.2677        | 1114.4931        | 0.7746         | 0        | 12        | 11             | 2         | K.ASSGEFDFQK.F                                                                                        |
| <a href="#">1882</a>  | 599.5156        | 1197.0167        | 1196.6401        | 0.3766         | 0        | 8         | 24             | 7         | K.SVEASIPEPLR.E <a href="#">1886</a>                                                                  |
| <a href="#">2738</a>  | <b>655.5111</b> | <b>1309.0077</b> | <b>1307.6213</b> | <b>1.3864</b>  | <b>0</b> | <b>23</b> | <b>0.86</b>    | <b>2</b>  | <b>R.ALDNAMLNVMGK.D</b>                                                                               |
| <a href="#">2868</a>  | <b>663.5951</b> | <b>1325.1757</b> | <b>1324.7027</b> | <b>0.4730</b>  | <b>0</b> | <b>68</b> | <b>2.8e-05</b> | <b>1</b>  | <b>K.VIFIQDYNVSK.A</b>                                                                                |
| <a href="#">4187</a>  | 490.5599        | 1468.6577        | 1468.7231        | -0.0654        | 1        | 10        | 16             | 7         | R.YLTIKSMSPPEER.K                                                                                     |
| <a href="#">4930</a>  | 776.0496        | 1550.0847        | 1548.8381        | 1.2466         | 1        | 3         | 69             | 4         | K.MVRMAHIAIVGSHK.V <a href="#">4948</a>                                                               |
| <a href="#">6277</a>  | <b>555.2745</b> | <b>1662.8017</b> | <b>1663.8756</b> | <b>-1.0739</b> | <b>1</b> | <b>5</b>  | <b>51</b>      | <b>10</b> | <b>R.VSIIGKKAAPGYWMAK.T</b>                                                                           |
| <a href="#">6458</a>  | 838.8021        | 1675.5897        | 1674.8981        | 0.6916         | 0        | 1         | 1.2e+02        | 8         | K.LGGYHFLTDLALLDK.L                                                                                   |
| <a href="#">6607</a>  | 562.8589        | 1685.5547        | 1684.9009        | 0.6538         | 2        | 2         | 88             | 10        | R.DRLIIDWNKTQQR.Q                                                                                     |
| <a href="#">6687</a>  | 846.6811        | 1691.3477        | 1689.8145        | 1.5333         | 1        | 1         | 1.1e+02        | 4         | K.SITSVARMGFFSTDR.V                                                                                   |
| <a href="#">6861</a>  | <b>852.9151</b> | <b>1703.8157</b> | <b>1704.8287</b> | <b>-1.0130</b> | <b>1</b> | <b>1</b>  | <b>1.3e+02</b> | <b>3</b>  | <b>R.ALDNAMLNVMGKDAAR.D</b>                                                                           |
| <a href="#">6943</a>  | <b>856.6636</b> | <b>1711.3127</b> | <b>1710.7597</b> | <b>0.5530</b>  | <b>0</b> | <b>98</b> | <b>2.5e-08</b> | <b>1</b>  | <b>K.FNAGDYENAVAEQQR.A</b>                                                                            |
| <a href="#">8459</a>  | 621.4819        | 1861.4237        | 1862.0162        | -0.5925        | 1        | 2         | 94             | 7         | R.WLHQANPRLSDLIATK.L                                                                                  |
| <a href="#">9515</a>  | <b>663.1269</b> | <b>1986.3587</b> | <b>1984.0629</b> | <b>2.2958</b>  | <b>0</b> | <b>40</b> | <b>0.014</b>   | <b>1</b>  | <b>K.VNGVAELHSDLLQTTLFK.D</b>                                                                         |
| <a href="#">10366</a> | 694.1942        | 2079.5607        | 2078.0029        | 1.5579         | 0        | 3         | 59             | 3         | R.IEDVIDQEHDAALGNGLGR.L                                                                               |
| <a href="#">10687</a> | 709.6185        | 2125.8337        | 2124.1361        | 1.6976         | 2        | 3         | 69             | 6         | R.DLLSRVSIIEESHPKMVR.M                                                                                |
| <a href="#">10758</a> | <b>713.3189</b> | <b>2136.9347</b> | <b>2134.0510</b> | <b>2.8837</b>  | <b>2</b> | <b>9</b>  | <b>17</b>      | <b>1</b>  | <b>R.ALDNAMLNVMGKDAARDGLK.N</b>                                                                       |
| <a href="#">10838</a> | 1073.6321       | 2145.2497        | 2144.0790        | 1.1708         | 1        | 53        | 0.00059        | 1         | R.VINEYADGIWNVEPLAVKD.-                                                                               |
| <a href="#">11492</a> | 1118.5146       | 2235.0147        | 2232.1573        | 2.8575         | 0        | 11        | 10             | 1         | K.FVLNGGLIIGTCDGANIEITR.E                                                                             |
| <a href="#">12456</a> | 793.6842        | 2378.0307        | 2379.2661        | -1.2353        | 1        | 6         | 29             | 2         | R.HMQIIFDINLFFLQTVK.F <a href="#">12466</a> <a href="#">12468</a> <a href="#">12473</a>               |
| <a href="#">12883</a> | 813.2992        | 2436.8757        | 2434.2016        | 2.6741         | 0        | 3         | 61             | 3         | R.EIGEQNIFLFGNLAEDVEELR.H                                                                             |
| <a href="#">12895</a> | <b>813.8395</b> | <b>2438.4967</b> | <b>2437.2464</b> | <b>1.2504</b>  | <b>0</b> | <b>56</b> | <b>0.00027</b> | <b>1</b>  | <b>R.LAACLLDSLATLNYPAWGYGLR.Y</b> <a href="#">12894</a>                                               |
| <a href="#">13619</a> | <b>845.2705</b> | <b>2532.7897</b> | <b>2531.3595</b> | <b>1.4302</b>  | <b>0</b> | <b>16</b> | <b>3.3</b>     | <b>1</b>  | <b>K.TVIHLVNSVASVVNNDPDIGDLLK.V</b> <a href="#">13607</a> <a href="#">13624</a> <a href="#">13627</a> |
| <a href="#">14284</a> | 886.6499        | 2656.9277        | 2658.4381        | -1.5104        | 2        | 0         | 1.1e+02        | 4         | R.LAKHIKDTTGYSVNPTALFDIQVK.R                                                                          |
| <a href="#">14484</a> | <b>895.8642</b> | <b>2684.5707</b> | <b>2684.4254</b> | <b>0.1453</b>  | <b>2</b> | <b>4</b>  | <b>43</b>      | <b>1</b>  | <b>R.VSIIEESHPKMVRMAHIAIVGSHK.V</b>                                                                   |
| <a href="#">15167</a> | 954.7382        | 2861.1927        | 2858.5881        | 2.6047         | 2        | 3         | 53             | 10        | K.LLPRHMQIIFDINLFFLQTVK.F                                                                             |

105. [gi|220693543|gb|EED49888.1|](#) Mass: 29437 Score: 232 Queries matched: 12 emPAI: 0.24

mitochondrial hypoxia responsive domain protein [Aspergillus flavus NRRL3357]

| Query               | Observed | Mr(expt) | Mr(calc) | Delta   | Miss | Score | Expect | Rank | Peptide     |
|---------------------|----------|----------|----------|---------|------|-------|--------|------|-------------|
| <a href="#">131</a> | 742.4640 | 741.4567 | 742.5065 | -1.0498 | 2    | 3     | 76     | 7    | K.GKGILKK.K |

|                       |                  |                  |                  |               |   |            |                |          |                                                                                                  |
|-----------------------|------------------|------------------|------------------|---------------|---|------------|----------------|----------|--------------------------------------------------------------------------------------------------|
| <a href="#">6180</a>  | 828.8126         | 1655.6107        | 1655.8227        | -0.2120       | 1 | 6          | 35             | 5        | K.EGQQQQQQAKEVK.E <a href="#">6174</a> <a href="#">6208</a>                                      |
| <a href="#">7278</a>  | 582.7869         | 1745.3387        | 1743.7920        | 1.5467        | 1 | 3          | 68             | 3        | R.LREESLQGM <u>S</u> FMER.S                                                                      |
| <a href="#">9663</a>  | <b>1002.4336</b> | <b>2002.8527</b> | <b>2002.1211</b> | <b>0.7316</b> | 0 | <b>120</b> | <b>1.5e-10</b> | <b>1</b> | <b>K.GGTIGTVLGLIGGYAGVLAASR.R</b> <a href="#">9664</a> <a href="#">9668</a> <a href="#">9679</a> |
| <a href="#">10930</a> | 719.7572         | 2156.2497        | 2158.2222        | -1.9725       | 1 | 2          | 78             | 3        | K.GGTIGTVLGLIGGYAGVLAASRR.Y                                                                      |
| <a href="#">12695</a> | 805.6495         | 2413.9267        | 2412.1678        | 1.7589        | 2 | 3          | 61             | 4        | R.LREESLQGM <u>S</u> F <u>M</u> ERSLAWAR.K <a href="#">12702</a>                                 |

106. [gi|220688653|gb|EED45005.1|](#) Mass: 58964 Score: 231 Queries matched: 28 emPAI: 0.39

glutamate decarboxylase [Aspergillus flavus NRRL3357]

| Query                 | Observed         | Mr(expt)         | Mr(calc)         | Delta          | Miss | Score     | Expect         | Rank     | Peptide                                                                                  |
|-----------------------|------------------|------------------|------------------|----------------|------|-----------|----------------|----------|------------------------------------------------------------------------------------------|
| <a href="#">670</a>   | 958.3540         | 957.3467         | 956.4239         | 0.9228         | 0    | 8         | 30             | 5        | R.YFDVEER.Y                                                                              |
| <a href="#">1128</a>  | <b>528.7416</b>  | <b>1055.4687</b> | <b>1055.5975</b> | <b>-0.1287</b> | 0    | <b>33</b> | <b>0.07</b>    | <b>1</b> | <b>K.AINDLLIER.N</b> <a href="#">1140</a> <a href="#">1141</a>                           |
| <a href="#">1187</a>  | <b>534.7106</b>  | <b>1067.4067</b> | <b>1065.6084</b> | <b>1.7984</b>  | 0    | <b>23</b> | <b>0.68</b>    | <b>1</b> | <b>R.GHGLPLVAFR.L</b> <a href="#">1172</a>                                               |
| <a href="#">1350</a>  | 549.6431         | 1097.2717        | 1097.5362        | -0.2644        | 0    | 10        | 15             | 10       | K.MGFIIMSQR.R                                                                            |
| <a href="#">2469</a>  | 639.7816         | 1277.5487        | 1276.6445        | 0.9042         | 1    | 6         | 42             | 8        | K.SRCDALLSDIK.L                                                                          |
| <a href="#">3981</a>  | 723.6671         | 1445.3197        | 1444.7959        | 0.5238         | 1    | 7         | 33             | 7        | R.CDALLSDIKLGLK.T                                                                        |
| <a href="#">5641</a>  | <b>807.7896</b>  | <b>1613.5647</b> | <b>1612.8031</b> | <b>0.7616</b>  | 0    | <b>58</b> | <b>0.00021</b> | <b>1</b> | <b>K.GASQVIGQYYQMIR.L</b> <a href="#">5637</a> <a href="#">5652</a> <a href="#">5665</a> |
| <a href="#">6132</a>  | 826.8216         | 1651.6287        | 1649.8719        | 1.7569         | 0    | 14        | 6.6            | 2        | K.YGLVYPGVGWVWR.S                                                                        |
| <a href="#">6226</a>  | <b>830.7006</b>  | <b>1659.3867</b> | <b>1659.8005</b> | <b>-0.4138</b> | 0    | <b>79</b> | <b>1.9e-06</b> | <b>1</b> | <b>R.EGQFDEFALAHQLR.E</b> <a href="#">6240</a> <a href="#">6244</a> <a href="#">6246</a> |
| <a href="#">6465</a>  | 559.7225         | 1676.1457        | 1675.7876        | 0.3582         | 0    | 4         | 60             | 9        | R.FATEQLPQTEMPER.E                                                                       |
| <a href="#">7439</a>  | 588.8105         | 1763.4097        | 1763.9161        | -0.5064        | 2    | 4         | 59             | 3        | K.LGLKTLGDMDKAMLDK.Y <a href="#">7421</a> <a href="#">7451</a>                           |
| <a href="#">9194</a>  | 649.4035         | 1945.1887        | 1944.9442        | 0.2445         | 1    | 2         | 87             | 7        | R.EGQFDEFALAHQLRER.G                                                                     |
| <a href="#">10305</a> | 691.2709         | 2070.7907        | 2072.1239        | -1.3332        | 2    | 1         | <b>1.1e+02</b> | 8        | M.VHLAQVHRNADLDSTIKR.V                                                                   |
| <a href="#">10685</a> | <b>709.3819</b>  | <b>2125.1237</b> | <b>2123.0820</b> | <b>2.0417</b>  | 0    | <b>32</b> | <b>0.087</b>   | <b>1</b> | <b>R.SIMTNITVTADFLAQELEK.M</b> <a href="#">10688</a>                                     |
| <a href="#">11453</a> | 743.7645         | 2228.2717        | 2226.1181        | 2.1536         | 1    | 2         | 84             | 9        | R.LPAEREGQFDEFALAHQLR.E                                                                  |
| <a href="#">16388</a> | <b>1158.1929</b> | <b>3471.5567</b> | <b>3470.6520</b> | <b>0.9047</b>  | 0    | <b>64</b> | <b>3.3e-05</b> | <b>1</b> | <b>R.LFNAPVHSEDEHPMGTSTIGSSEAIMLGLTAMK.R</b>                                             |

107. [gi|220701216|gb|EED57554.1|](#) Mass: 19753 Score: 231 Queries matched: 11 emPAI: 0.17

TCTP family protein [Aspergillus flavus NRRL3357]

| Query                 | Observed        | Mr(expt)         | Mr(calc)         | Delta         | Miss | Score     | Expect         | Rank     | Peptide                                                                                                                                                                       |
|-----------------------|-----------------|------------------|------------------|---------------|------|-----------|----------------|----------|-------------------------------------------------------------------------------------------------------------------------------------------------------------------------------|
| <a href="#">35</a>    | 665.5110        | 664.5037         | 666.3774         | -1.8737       | 0    | 17        | 2.8            | 3        | -.MIIYK.D                                                                                                                                                                     |
| <a href="#">2483</a>  | 640.6976        | 1279.3807        | 1277.6615        | 1.7192        | 1    | 4         | 62             | 3        | K.EFKENAQTALK.R                                                                                                                                                               |
| <a href="#">7441</a>  | <b>882.7491</b> | <b>1763.4837</b> | <b>1762.8989</b> | <b>0.5848</b> | 0    | <b>91</b> | <b>1.1e-07</b> | <b>1</b> | <b>K.DILTGDEIISDAFNLK.E</b> <a href="#">7425</a> <a href="#">7437</a> <a href="#">7438</a> <a href="#">7444</a> <a href="#">7445</a> <a href="#">7449</a> <a href="#">747</a> |
| <a href="#">11776</a> | 760.9799        | 2279.9177        | 2280.2253        | -0.3076       | 1    | 12        | 8.4            | 2        | M.IIYKDILTGDEIISDAFNLK.E                                                                                                                                                      |

108. [gi|220695209|gb|EED51552.1|](#) Mass: 58541 Score: 230 Queries matched: 15 emPAI: 0.24

myo-inositol-phosphate synthase, putative [Aspergillus flavus NRRL3357]

| Query               | Observed        | Mr(expt)        | Mr(calc)        | Delta         | Miss | Score     | Expect      | Rank     | Peptide                                  |
|---------------------|-----------------|-----------------|-----------------|---------------|------|-----------|-------------|----------|------------------------------------------|
| <a href="#">736</a> | <b>485.4406</b> | <b>968.8667</b> | <b>968.4604</b> | <b>0.4064</b> | 0    | <b>27</b> | <b>0.29</b> | <b>1</b> | <b>K.AFIGGDDFK.S</b> <a href="#">747</a> |
| <a href="#">803</a> | 492.5746        | 983.1347        | 983.5651        | -0.4304       | 0    | 8         | 23          | 8        | R.AQVLEPSLK.Q                            |

|                       |                  |                  |                  |                |          |           |                |          |                                                                             |
|-----------------------|------------------|------------------|------------------|----------------|----------|-----------|----------------|----------|-----------------------------------------------------------------------------|
| <a href="#">3241</a>  | <b>681.8566</b>  | <b>1361.6987</b> | <b>1359.7762</b> | <b>1.9225</b>  | <b>0</b> | <b>64</b> | <b>6.8e-05</b> | <b>1</b> | <b>K.SALVDFLINAGIK.L</b> <a href="#">3227</a>                               |
| <a href="#">5235</a>  | 791.2911         | 1580.5677        | 1579.8432        | 0.7245         | 0        | 26        | 0.39           | 1        | K.GFHSVLSVLSYMLK.A                                                          |
| <a href="#">5319</a>  | <b>794.9256</b>  | <b>1587.8367</b> | <b>1587.8984</b> | <b>-0.0617</b> | <b>0</b> | <b>58</b> | <b>0.00023</b> | <b>1</b> | <b>K.APLTPPGTTPVVALNK.Q</b> <a href="#">5350</a> <a href="#">5359</a>       |
| <a href="#">5718</a>  | 810.8976         | 1619.7807        | 1618.9116        | 0.8691         | 1        | 12        | 9.8            | 6        | K.MKSALVDFLINAGIK.L <a href="#">5726</a>                                    |
| <a href="#">10730</a> | <b>1066.4086</b> | <b>2130.8027</b> | <b>2131.0797</b> | <b>-0.2770</b> | <b>0</b> | <b>67</b> | <b>2.9e-05</b> | <b>1</b> | <b>R.YADIVPGVNDTADNLLNSIK.T</b> <a href="#">10735</a> <a href="#">10740</a> |
| <a href="#">13886</a> | <b>860.6999</b>  | <b>2579.0777</b> | <b>2580.2359</b> | <b>-1.1582</b> | <b>1</b> | <b>4</b>  | <b>48</b>      | <b>2</b> | <b>K.VGMMVGVGGNNGSTVTAGIIANRR.G</b>                                         |

109. [gi|220694293|gb|EED50637.1|](#) Mass: 52402 Score: 228 Queries matched: 26 emPAI: 0.28

secretory pathway gdp dissociation inhibitor [Aspergillus flavus NRRL3357]

| Query                 | Observed         | Mr(expt)         | Mr(calc)         | Delta         | Miss     | Score     | Expect         | Rank     | Peptide                                                                                                                |
|-----------------------|------------------|------------------|------------------|---------------|----------|-----------|----------------|----------|------------------------------------------------------------------------------------------------------------------------|
| <a href="#">658</a>   | 476.8966         | 951.7787         | 952.4800         | -0.7013       | 0        | 13        | 7.5            | 7        | R.LYVNSMAR.Y <a href="#">657</a>                                                                                       |
| <a href="#">967</a>   | <b>511.4011</b>  | <b>1020.7877</b> | <b>1020.4658</b> | <b>0.3219</b> | <b>0</b> | <b>16</b> | <b>4.6</b>     | <b>1</b> | <b>K.SGMAADAINR.I</b>                                                                                                  |
| <a href="#">1205</a>  | 536.2781         | 1070.5417        | 1070.5356        | 0.0061        | 0        | 7         | 31             | 10       | K.VPSDANEALR.S                                                                                                         |
| <a href="#">2106</a>  | <b>619.4111</b>  | <b>1236.8077</b> | <b>1236.6390</b> | <b>0.1687</b> | <b>0</b> | <b>55</b> | <b>0.00044</b> | <b>1</b> | <b>K.ILADPSYFPSK.A</b> <a href="#">2110</a>                                                                            |
| <a href="#">3194</a>  | 680.2076         | 1358.4007        | 1356.6642        | 1.7365        | 2        | 6         | 41             | 3        | R.SSLMGMFEKRR.A                                                                                                        |
| <a href="#">5839</a>  | 815.6186         | 1629.2227        | 1628.7682        | 0.4545        | 1        | 3         | 78             | 4        | K.EVYDKFSLEENTR.D                                                                                                      |
| <a href="#">7871</a>  | 601.1735         | 1800.4987        | 1799.9013        | 0.5974        | 1        | 6         | 37             | 7        | R.ATGEELVVEGLREDQR.L                                                                                                   |
| <a href="#">7878</a>  | 601.3649         | 1801.0727        | 1799.7962        | 1.2765        | 0        | 3         | 78             | 8        | K.SYDATSHFETTADV.R                                                                                                     |
| <a href="#">8361</a>  | 618.5165         | 1852.5277        | 1853.0006        | -0.4729       | 2        | 1         | 1e+02          | 4        | K.SP KATVAKVPSDANEALR.S                                                                                                |
| <a href="#">8942</a>  | 638.9455         | 1913.8147        | 1912.9854        | 0.8293        | 0        | 2         | 94             | 5        | K.TDGSDSLQLIIPQSQVGR.K                                                                                                 |
| <a href="#">9291</a>  | 653.5459         | 1957.6157        | 1956.0024        | 1.6133        | 2        | 4         | 59             | 10       | R.RATGEELVVEGLREDQR.L                                                                                                  |
| <a href="#">10219</a> | 1031.7861        | 2061.5577        | 2059.0983        | 2.4594        | 0        | 19        | 1.6            | 2        | K.LLMANGELTNILVSTDVTR.Y <a href="#">10201</a>                                                                          |
| <a href="#">10481</a> | 699.2495         | 2094.7267        | 2092.0225        | 2.7042        | 1        | 3         | 73             | 2        | R.NDHYGGEAASVNIETLFKK.Y                                                                                                |
| <a href="#">10795</a> | <b>1071.3851</b> | <b>2140.7557</b> | <b>2140.0993</b> | <b>0.6564</b> | <b>0</b> | <b>83</b> | <b>6.6e-07</b> | <b>1</b> | <b>K.SPYIYPLYGLGELPQGFAR.L</b> <a href="#">10804</a> <a href="#">10805</a> <a href="#">10807</a> <a href="#">10816</a> |
| <a href="#">14687</a> | <b>1362.3656</b> | <b>2722.7167</b> | <b>2722.3530</b> | <b>0.3637</b> | <b>0</b> | <b>30</b> | <b>0.12</b>    | <b>1</b> | <b>K.FFGPPPIPLYEPLGENDNIFISK.S</b>                                                                                     |
| <a href="#">15034</a> | 943.3162         | 2826.9267        | 2825.4460        | 1.4807        | 2        | 6         | 31             | 3        | K.VLHIDRNDHYGGEAASVNIETLFKK.Y <a href="#">15033</a>                                                                    |
| <a href="#">16147</a> | 1110.7329        | 3329.1767        | 3330.5761        | -1.3994       | 2        | 0         | 82             | 9        | R.DFIGHSMALYQSDDYIGKSGMAADAINRIR.L <a href="#">16146</a>                                                               |

110. [gi|220695019|gb|EED51362.1|](#) Mass: 17018 Score: 226 Queries matched: 20 emPAI: 1.97

ribosomal protein L14 [Aspergillus flavus NRRL3357]

| Query                 | Observed        | Mr(expt)         | Mr(calc)         | Delta         | Miss     | Score     | Expect         | Rank     | Peptide                                                                                     |
|-----------------------|-----------------|------------------|------------------|---------------|----------|-----------|----------------|----------|---------------------------------------------------------------------------------------------|
| <a href="#">64</a>    | <b>686.5530</b> | <b>685.5457</b>  | <b>685.4123</b>  | <b>0.1335</b> | <b>0</b> | <b>26</b> | <b>0.54</b>    | <b>1</b> | <b>K.LVEIGR.V</b>                                                                           |
| <a href="#">517</a>   | 907.4730        | 906.4657         | 906.4195         | 0.0462        | 0        | 40        | 0.018          | 1        | K.NLNDFER.F <a href="#">516</a> <a href="#">521</a> <a href="#">522</a> <a href="#">523</a> |
| <a href="#">1107</a>  | <b>527.0886</b> | <b>1052.1627</b> | <b>1051.5087</b> | <b>0.6540</b> | <b>0</b> | <b>44</b> | <b>0.0062</b>  | <b>1</b> | <b>K.WAQSSFAQK.T</b> <a href="#">1106</a>                                                   |
| <a href="#">2068</a>  | 616.4051        | 1230.7957        | 1232.6401        | -1.8444       | 1        | 1         | 1.4e+02        | 4        | K.LWQKSEIDSK.W                                                                              |
| <a href="#">2346</a>  | <b>633.7606</b> | <b>1265.5067</b> | <b>1264.7139</b> | <b>0.7928</b> | <b>0</b> | <b>42</b> | <b>0.0092</b>  | <b>1</b> | <b>K.LATIVEIVDHR.R</b> <a href="#">2349</a> <a href="#">2353</a> <a href="#">2360</a>       |
| <a href="#">2549</a>  | <b>644.6191</b> | <b>1287.2237</b> | <b>1286.6354</b> | <b>0.5883</b> | <b>0</b> | <b>69</b> | <b>2.2e-05</b> | <b>1</b> | <b>R.VLVDGPSTEENK.I</b> <a href="#">2550</a> <a href="#">2557</a>                           |
| <a href="#">8531</a>  | <b>624.6025</b> | <b>1870.7857</b> | <b>1868.0156</b> | <b>2.7701</b> | <b>1</b> | <b>13</b> | <b>7.5</b>     | <b>1</b> | <b>R.GPYTGKLATIVEIVDHR.R</b>                                                                |
| <a href="#">11651</a> | 754.3675        | 2260.0807        | 2259.3004        | 0.7803        | 0        | 54        | 0.00046        | 1        | R.HVLPLAHATLTHFVIPQLPR.A <a href="#">11656</a> <a href="#">11669</a>                        |

111. [gi|220693633|gb|EED49978.1|](#) Mass: 24321 Score: 218 Queries matched: 31 emPAI: 1.46

60S ribosomal protein L1 [Aspergillus flavus NRRL3357]

| Query                 | Observed        | Mr(expt)         | Mr(calc)         | Delta          | Miss | Score       | Expect         | Rank     | Peptide                                                                                                                                         |
|-----------------------|-----------------|------------------|------------------|----------------|------|-------------|----------------|----------|-------------------------------------------------------------------------------------------------------------------------------------------------|
| <a href="#">96</a>    | <b>715.5640</b> | <b>714.5567</b>  | <b>714.4388</b>  | <b>0.1179</b>  | 0    | <b>11</b>   | <b>18</b>      | <b>1</b> | <b>K.ITVAGVR.Q</b> <a href="#">94</a>                                                                                                           |
| <a href="#">206</a>   | <b>392.9781</b> | <b>783.9417</b>  | <b>783.4854</b>  | <b>0.4563</b>  | 0    | <b>31</b>   | <b>0.12</b>    | <b>1</b> | <b>R.LLGPGLSK.A</b> <a href="#">201</a> <a href="#">202</a> <a href="#">205</a>                                                                 |
| <a href="#">1904</a>  | <b>601.4066</b> | <b>1200.7987</b> | <b>1199.6663</b> | <b>1.1325</b>  | 0    | <b>44</b>   | <b>0.0061</b>  | <b>1</b> | <b>K.GWQNVGSLVLK.A</b>                                                                                                                          |
| <a href="#">4483</a>  | 752.7616        | 1503.5087        | 1502.8344        | 0.6743         | 0    | 29          | 0.19           | 2        | R.NFLETVELQIGLK.N <a href="#">4464</a> <a href="#">4472</a> <a href="#">4476</a> <a href="#">4480</a> <a href="#">4484</a> <a href="#">4491</a> |
| <a href="#">5005</a>  | <b>779.5966</b> | <b>1557.1787</b> | <b>1556.7293</b> | <b>0.4494</b>  | 0    | <b>52</b>   | <b>0.0011</b>  | <b>1</b> | <b>K.FPTPISHAEDMANK.V</b> <a href="#">5012</a>                                                                                                  |
| <a href="#">5168</a>  | <b>787.5946</b> | <b>1573.1747</b> | <b>1572.7242</b> | <b>0.4505</b>  | 0    | <b>(48)</b> | <b>0.0026</b>  | <b>1</b> | <b>K.FPTPISHAEDMANK.V</b> <a href="#">5165</a> <a href="#">5166</a> <a href="#">5167</a>                                                        |
| <a href="#">5422</a>  | <b>533.3979</b> | <b>1597.1717</b> | <b>1596.7566</b> | <b>0.4151</b>  | 1    | <b>1</b>    | <b>1.2e+02</b> | <b>7</b> | <b>K.HHGIDAMSTEDLKK.L</b>                                                                                                                       |
| <a href="#">7026</a>  | <b>861.1501</b> | <b>1720.2857</b> | <b>1719.8427</b> | <b>0.4430</b>  | 0    | <b>79</b>   | <b>1.9e-06</b> | <b>1</b> | <b>R.QNIQQLLDYSQNEK.K</b> <a href="#">7020</a> <a href="#">7037</a>                                                                             |
| <a href="#">8169</a>  | 611.2225        | 1830.6457        | 1828.8778        | 1.7680         | 1    | 2           | 84             | 3        | K.AGKFPTPISHAEDMANK.V                                                                                                                           |
| <a href="#">9867</a>  | <b>676.5959</b> | <b>2026.7657</b> | <b>2026.1033</b> | <b>0.6624</b>  | 2    | <b>2</b>    | <b>85</b>      | <b>7</b> | <b>K.KGWQNVGSLVLKASMSPPK.R</b> <a href="#">9850</a> <a href="#">9852</a>                                                                        |
| <a href="#">13590</a> | 844.0989        | 2529.2747        | 2528.2945        | 0.9803         | 2    | 3           | 61             | 5        | K.FPTPISHAEDMANKVTDVKSTIK.F                                                                                                                     |
| <a href="#">13801</a> | <b>854.9689</b> | <b>2561.8847</b> | <b>2562.2683</b> | <b>-0.3836</b> | 0    | <b>31</b>   | <b>0.088</b>   | <b>1</b> | <b>K.LPSVPRPNMTICILGDQHDLDLDR.A</b> <a href="#">13798</a>                                                                                       |

112. [gi|220700819|gb|EED57157.1|](#) Mass: 26441 Score: 217 Queries matched: 17 emPAI: 0.43

mitochondrial ATPase subunit ATP4, putative [Aspergillus flavus NRRL3357]

| Query                 | Observed        | Mr(expt)         | Mr(calc)         | Delta          | Miss | Score       | Expect         | Rank     | Peptide                                                              |
|-----------------------|-----------------|------------------|------------------|----------------|------|-------------|----------------|----------|----------------------------------------------------------------------|
| <a href="#">405</a>   | 865.5530        | 864.5457         | 866.4167         | -1.8710        | 1    | 9           | 20             | 4        | R.IMSSSKAQ.-                                                         |
| <a href="#">643</a>   | <b>473.6161</b> | <b>945.2177</b>  | <b>944.5178</b>  | <b>0.6999</b>  | 0    | <b>23</b>   | <b>1.1</b>     | <b>1</b> | <b>R.ELAESVIGK.I</b>                                                 |
| <a href="#">2251</a>  | <b>628.8206</b> | <b>1255.6267</b> | <b>1253.7092</b> | <b>1.9176</b>  | 0    | <b>1</b>    | <b>1.3e+02</b> | <b>3</b> | <b>R.NVAPIANLTVSR.S</b>                                              |
| <a href="#">3606</a>  | <b>701.0621</b> | <b>1400.1097</b> | <b>1399.7307</b> | <b>0.3790</b>  | 2    | <b>1</b>    | <b>1.3e+02</b> | <b>8</b> | <b>R.SASNVPTEDPKKK.A</b>                                             |
| <a href="#">5613</a>  | 806.7571        | 1611.4997        | 1611.8832        | -0.3834        | 0    | 0           | 1.4e+02        | 3        | K.AQSILDALPGNSLVSK.T                                                 |
| <a href="#">5880</a>  | <b>817.3081</b> | <b>1632.6017</b> | <b>1630.8236</b> | <b>1.7781</b>  | 0    | <b>(44)</b> | <b>0.0067</b>  | <b>1</b> | <b>R.MDNVQELAGVVEVTK.Q</b> <a href="#">5879</a>                      |
| <a href="#">6087</a>  | <b>825.2571</b> | <b>1648.4997</b> | <b>1646.8185</b> | <b>1.6812</b>  | 0    | <b>83</b>   | <b>8.4e-07</b> | <b>1</b> | <b>R.MDNVQELAGVVEVTK.Q</b> <a href="#">6095</a>                      |
| <a href="#">7085</a>  | <b>863.8211</b> | <b>1725.6277</b> | <b>1724.9421</b> | <b>0.6856</b>  | 0    | <b>89</b>   | <b>1.6e-07</b> | <b>1</b> | <b>K.VLQQILQQSVADVER.I</b> <a href="#">7084</a> <a href="#">7103</a> |
| <a href="#">7613</a>  | <b>889.8421</b> | <b>1777.6697</b> | <b>1777.8482</b> | <b>-0.1785</b> | 0    | <b>21</b>   | <b>1.3</b>     | <b>1</b> | <b>K.ETAQLEAQAYELEQR.T</b> <a href="#">7612</a>                      |
| <a href="#">9829</a>  | <b>675.7392</b> | <b>2024.1957</b> | <b>2024.1153</b> | <b>0.0804</b>  | 2    | <b>5</b>    | <b>40</b>      | <b>3</b> | <b>R.ELAESVIGKIQKELENPK.V</b> <a href="#">9828</a>                   |
| <a href="#">12855</a> | <b>812.4765</b> | <b>2434.4077</b> | <b>2435.3020</b> | <b>-0.8942</b> | 1    | <b>1</b>    | <b>1.1e+02</b> | <b>5</b> | <b>K.ELENPKVLQQILQQSVADVER.I</b>                                     |

113. [gi|220701753|gb|EED58091.1|](#) Mass: 58506 Score: 216 Queries matched: 33 emPAI: 0.39

pyruvate kinase [Aspergillus flavus NRRL3357]

| Query                | Observed        | Mr(expt)         | Mr(calc)         | Delta          | Miss | Score     | Expect       | Rank     | Peptide                                     |
|----------------------|-----------------|------------------|------------------|----------------|------|-----------|--------------|----------|---------------------------------------------|
| <a href="#">74</a>   | <b>690.6400</b> | <b>689.6327</b>  | <b>689.3596</b>  | <b>0.2732</b>  | 0    | <b>32</b> | <b>0.15</b>  | <b>1</b> | <b>K.DISDLK.F</b> <a href="#">71</a>        |
| <a href="#">539</a>  | 911.6280        | 910.6207         | 910.5025         | 0.1183         | 0    | 4         | 58           | 8        | K.WAISHGIK.L                                |
| <a href="#">819</a>  | <b>494.0206</b> | <b>986.0267</b>  | <b>985.5808</b>  | <b>0.4459</b>  | 0    | <b>37</b> | <b>0.037</b> | <b>1</b> | <b>R.TSIIGTIGPK.T</b> <a href="#">818</a>   |
| <a href="#">1410</a> | <b>555.1711</b> | <b>1108.3277</b> | <b>1108.6128</b> | <b>-0.2851</b> | 0    | <b>29</b> | <b>0.18</b>  | <b>1</b> | <b>R.GDLGIEIPAPK.V</b> <a href="#">1419</a> |

|                       |                  |                  |                  |                |          |            |                |          |                                                                                                                  |
|-----------------------|------------------|------------------|------------------|----------------|----------|------------|----------------|----------|------------------------------------------------------------------------------------------------------------------|
| <a href="#">1637</a>  | 572.6926         | 1143.3707        | 1141.6819        | 1.6888         | 1        | 10         | 18             | 2        | R.RTSIIGTIGPK.T                                                                                                  |
| <a href="#">2707</a>  | <b>653.6971</b>  | <b>1305.3797</b> | <b>1302.6139</b> | <b>2.7658</b>  | <b>0</b> | <b>19</b>  | <b>2</b>       | <b>1</b> | <b>K.GDNIVCVQGW.R.G</b> <a href="#">2702</a>                                                                     |
| <a href="#">3335</a>  | <b>686.3781</b>  | <b>1370.7417</b> | <b>1368.6860</b> | <b>2.0557</b>  | <b>0</b> | <b>54</b>  | <b>0.00066</b> | <b>1</b> | <b>K.NGVDMIFASFIR.R</b>                                                                                          |
| <a href="#">3466</a>  | <b>693.6211</b>  | <b>1385.2277</b> | <b>1384.6809</b> | <b>0.5468</b>  | <b>0</b> | <b>(5)</b> | <b>52</b>      | <b>3</b> | <b>K.NGVDMIFASFIR.R</b>                                                                                          |
| <a href="#">4314</a>  | <b>495.2162</b>  | <b>1482.6267</b> | <b>1481.8566</b> | <b>0.7702</b>  | <b>0</b> | <b>4</b>   | <b>61</b>      | <b>1</b> | <b>R.VQTGRPLAIALDTK.G</b>                                                                                        |
| <a href="#">4564</a>  | <b>759.0391</b>  | <b>1516.0637</b> | <b>1515.7463</b> | <b>0.3174</b>  | <b>1</b> | <b>8</b>   | <b>27</b>      | <b>1</b> | <b>M.AASSSLDHLNRMK.L</b>                                                                                         |
| <a href="#">4929</a>  | 776.0486         | 1550.0827        | 1548.9140        | 1.1687         | 1        | 2          | 92             | 2        | K.WAISHGIKLGINK.G <a href="#">4912</a> <a href="#">4941</a>                                                      |
| <a href="#">8357</a>  | <b>618.3802</b>  | <b>1852.1187</b> | <b>1851.9942</b> | <b>0.1245</b>  | <b>1</b> | <b>6</b>   | <b>34</b>      | <b>2</b> | <b>R.KGVNLPGTDVDLPALSEK.D</b>                                                                                    |
| <a href="#">8536</a>  | <b>624.6612</b>  | <b>1870.9617</b> | <b>1871.0022</b> | <b>-0.0405</b> | <b>1</b> | <b>7</b>   | <b>31</b>      | <b>5</b> | <b>K.YRPVCPILMVTNRPR.A</b> <a href="#">8534</a>                                                                  |
| <a href="#">8666</a>  | <b>629.6875</b>  | <b>1886.0407</b> | <b>1886.9971</b> | <b>-0.9564</b> | <b>1</b> | <b>(6)</b> | <b>37</b>      | <b>7</b> | <b>K.YRPVCPILMVTNRPR.A</b> <a href="#">8662</a>                                                                  |
| <a href="#">8915</a>  | <b>637.7372</b>  | <b>1910.1897</b> | <b>1909.0745</b> | <b>1.1152</b>  | <b>1</b> | <b>2</b>   | <b>92</b>      | <b>4</b> | <b>R.EAARVQTGRPLAIALDTK.G</b>                                                                                    |
| <a href="#">9924</a>  | <b>1017.7996</b> | <b>2033.5847</b> | <b>2033.0411</b> | <b>0.5436</b>  | <b>0</b> | <b>46</b>  | <b>0.0034</b>  | <b>1</b> | <b>R.GVWPFLLPENKPDFNVK.I</b> <a href="#">9925</a> <a href="#">9930</a> <a href="#">9935</a> <a href="#">9954</a> |
| <a href="#">10182</a> | <b>687.1332</b>  | <b>2058.3777</b> | <b>2057.0438</b> | <b>1.3340</b>  | <b>2</b> | <b>4</b>   | <b>50</b>      | <b>3</b> | <b>R.MKLEWHSKLNTEMVPAK.N</b>                                                                                     |
| <a href="#">12635</a> | <b>802.3682</b>  | <b>2404.0827</b> | <b>2401.3113</b> | <b>2.7714</b>  | <b>2</b> | <b>1</b>   | <b>1.1e+02</b> | <b>2</b> | <b>R.GDLGIEIPAPKVFIAQKMMIAK.C</b>                                                                                |
| <a href="#">13531</a> | <b>1262.2081</b> | <b>2522.4017</b> | <b>2521.1676</b> | <b>1.2341</b>  | <b>0</b> | <b>75</b>  | <b>3.9e-06</b> | <b>1</b> | <b>R.AEVSVDVANAVLDGADCVMLSGETAK.G</b> <a href="#">13509</a>                                                      |
| <a href="#">13810</a> | <b>855.4685</b>  | <b>2563.3837</b> | <b>2565.2502</b> | <b>-1.8664</b> | <b>0</b> | <b>2</b>   | <b>72</b>      | <b>4</b> | <b>K.GKPVICATQMLESMYTPRPR.A</b>                                                                                  |

114. [gi|220690678|gb|EED47027.1|](#) Mass: 16670 Score: 215 Queries matched: 18 emPAI: 0.74

40S ribosomal protein S12 [Aspergillus flavus NRRL3357]

| Query                 | Observed         | Mr(expt)         | Mr(calc)         | Delta          | Miss     | Score     | Expect         | Rank     | Peptide                                                                                                      |
|-----------------------|------------------|------------------|------------------|----------------|----------|-----------|----------------|----------|--------------------------------------------------------------------------------------------------------------|
| <a href="#">1333</a>  | <b>548.1411</b>  | <b>1094.2677</b> | <b>1093.6244</b> | <b>0.6433</b>  | <b>0</b> | <b>54</b> | <b>0.00057</b> | <b>1</b> | <b>R.ISLIHDGLAR.G</b> <a href="#">1338</a>                                                                   |
| <a href="#">1595</a>  | <b>1136.6510</b> | <b>1135.6437</b> | <b>1134.4578</b> | <b>1.1860</b>  | <b>0</b> | <b>18</b> | <b>2.5</b>     | <b>1</b> | <b>K.DWGEESQER.S</b>                                                                                         |
| <a href="#">1722</a>  | <b>1164.7460</b> | <b>1163.7387</b> | <b>1162.5839</b> | <b>1.1548</b>  | <b>0</b> | <b>17</b> | <b>2.9</b>     | <b>1</b> | <b>K.VVNCSCVVVK.D</b>                                                                                        |
| <a href="#">1744</a>  | 585.2721         | 1168.5297        | 1168.6274        | -0.0977        | 0        | 10        | 17             | 8        | K.LVIALCSEHK.I                                                                                               |
| <a href="#">2570</a>  | <b>646.0681</b>  | <b>1290.1217</b> | <b>1290.6788</b> | <b>-0.5571</b> | <b>1</b> | <b>7</b>  | <b>33</b>      | <b>2</b> | <b>R.KVVNCSCVVVK.D</b> <a href="#">2592</a>                                                                  |
| <a href="#">3045</a>  | <b>672.1581</b>  | <b>1342.3017</b> | <b>1340.6612</b> | <b>1.6405</b>  | <b>0</b> | <b>12</b> | <b>12</b>      | <b>2</b> | <b>R.SVLLNYFQTEQ.-</b> <a href="#">3036</a>                                                                  |
| <a href="#">5185</a>  | <b>789.1341</b>  | <b>1576.2537</b> | <b>1575.7538</b> | <b>0.5000</b>  | <b>0</b> | <b>73</b> | <b>7.3e-06</b> | <b>1</b> | <b>K.MLGEWVGLCQLDR.E</b> <a href="#">5191</a> <a href="#">5197</a> <a href="#">5206</a> <a href="#">5208</a> |
| <a href="#">8060</a>  | <b>606.8805</b>  | <b>1817.6197</b> | <b>1819.0428</b> | <b>-1.4230</b> | <b>2</b> | <b>7</b>  | <b>29</b>      | <b>2</b> | <b>R.ISLIHDGLARGLREAAK.A</b> <a href="#">8081</a>                                                            |
| <a href="#">10437</a> | <b>697.5029</b>  | <b>2089.4867</b> | <b>2088.0132</b> | <b>1.4735</b>  | <b>1</b> | <b>3</b>  | <b>62</b>      | <b>8</b> | <b>K.VPDGKMLGEWVGLCQLDR.E</b> <a href="#">10441</a>                                                          |

115. [gi|220692700|gb|EED49046.1|](#) Mass: 60045 Score: 213 Queries matched: 26 emPAI: 0.24

fumarate hydratase, putative [Aspergillus flavus NRRL3357]

| Query                | Observed        | Mr(expt)         | Mr(calc)         | Delta         | Miss     | Score     | Expect         | Rank     | Peptide                                       |
|----------------------|-----------------|------------------|------------------|---------------|----------|-----------|----------------|----------|-----------------------------------------------|
| <a href="#">651</a>  | 949.5220        | 948.5147         | 950.4644         | -1.9496       | 0        | 14        | 7.1            | 10       | -.MLAPSNFR.A <a href="#">650</a>              |
| <a href="#">1463</a> | 560.1881        | 1118.3617        | 1116.5346        | 1.8272        | 0        | 5         | 56             | 10       | R.SMASLAHAASR.A                               |
| <a href="#">2236</a> | 627.7271        | 1253.4397        | 1253.6326        | -0.1928       | 1        | 3         | 68             | 7        | R.ILSDGMKSFEEK.N <a href="#">2251</a>         |
| <a href="#">3020</a> | <b>670.9901</b> | <b>1339.9657</b> | <b>1339.6442</b> | <b>0.3215</b> | <b>1</b> | <b>0</b>  | <b>1.6e+02</b> | <b>4</b> | <b>K.MTGTEFKTAPNK.F</b>                       |
| <a href="#">3090</a> | <b>674.9986</b> | <b>1347.9827</b> | <b>1347.6895</b> | <b>0.2932</b> | <b>0</b> | <b>51</b> | <b>0.0014</b>  | <b>1</b> | <b>K.NLVHGLEANEPRI.I</b> <a href="#">3082</a> |
| <a href="#">3993</a> | 724.1831        | 1446.3517        | 1444.8402        | 1.5116        | 2        | 3         | 78             | 7        | K.VENFEKIIKIGR.T                              |

|                       |                  |                  |                  |                |          |           |                |          |                                                                 |
|-----------------------|------------------|------------------|------------------|----------------|----------|-----------|----------------|----------|-----------------------------------------------------------------|
| <a href="#">4482</a>  | <b>752.7106</b>  | <b>1503.4067</b> | <b>1502.7114</b> | <b>0.6954</b>  | <b>0</b> | <b>40</b> | <b>0.017</b>   | <b>1</b> | <b>R.SLGNFDINQPQDR.M</b> <a href="#">4468</a>                   |
| <a href="#">4787</a>  | <b>769.7306</b>  | <b>1537.4467</b> | <b>1534.7814</b> | <b>2.6654</b>  | <b>1</b> | <b>3</b>  | <b>74</b>      | <b>2</b> | <b>K.GAAATVNMKFGLDPK.I</b>                                      |
| <a href="#">5299</a>  | <b>529.5762</b>  | <b>1585.7067</b> | <b>1585.8246</b> | <b>-0.1179</b> | <b>1</b> | <b>7</b>  | <b>30</b>      | <b>6</b> | <b>R.NLLHSSRILSDGMK.S</b> <a href="#">5301</a>                  |
| <a href="#">5712</a>  | 810.7801         | 1619.5457        | 1618.7726        | 0.7731         | 0        | 11        | 11             | 3        | R.VETDAFGEIEVPADK.Y                                             |
| <a href="#">10235</a> | <b>688.6165</b>  | <b>2062.8277</b> | <b>2059.9772</b> | <b>2.8505</b>  | <b>1</b> | <b>2</b>  | <b>84</b>      | <b>7</b> | <b>K.GFDEAIAAEVTKMTGTEFK.T</b> <a href="#">10239</a>            |
| <a href="#">11462</a> | <b>744.2969</b>  | <b>2229.8687</b> | <b>2231.2170</b> | <b>-1.3483</b> | <b>2</b> | <b>1</b>  | <b>98</b>      | <b>5</b> | <b>R.MPEGVVKAFGILKGAAATVNMK.F</b> <a href="#">11481</a>         |
| <a href="#">11955</a> | 768.3372         | 2301.9897        | 2299.1967        | 2.7930         | 2        | 5         | 38             | 4        | M.LAPSNFRAAVRSMASLAHAASR.A <a href="#">11948</a>                |
| <a href="#">12690</a> | <b>805.4039</b>  | <b>2413.1897</b> | <b>2411.2451</b> | <b>1.9446</b>  | <b>2</b> | <b>3</b>  | <b>60</b>      | <b>6</b> | <b>R.AAVRSMASLAHAASRASASSPAVAR.S</b>                            |
| <a href="#">14315</a> | <b>887.8272</b>  | <b>2660.4597</b> | <b>2659.3242</b> | <b>1.1355</b>  | <b>0</b> | <b>75</b> | <b>3.8e-06</b> | <b>1</b> | <b>R.THLQDATPLTLGQEFSGYVAQLDR.N</b> <a href="#">14319</a>       |
| <a href="#">16021</a> | <b>1092.8492</b> | <b>3275.5257</b> | <b>3273.6703</b> | <b>1.8554</b>  | <b>1</b> | <b>54</b> | <b>0.00039</b> | <b>1</b> | <b>K.TAPNKFEVLAHDAIVEASGSLNTLACSLFK.I</b> <a href="#">16018</a> |

116. [gi|220696367|gb|EED52709.1|](#) Mass: 16028 Score: 212 Queries matched: 16 emPAI: 2.17

40S ribosomal protein Rps16, putative [Aspergillus flavus NRRL3357]

| Query                 | Observed        | Mr(expt)         | Mr(calc)         | Delta          | Miss     | Score     | Expect         | Rank     | Peptide                                                                                                                             |
|-----------------------|-----------------|------------------|------------------|----------------|----------|-----------|----------------|----------|-------------------------------------------------------------------------------------------------------------------------------------|
| <a href="#">191</a>   | <b>389.3446</b> | <b>776.6747</b>  | <b>776.4181</b>  | <b>0.2566</b>  | <b>0</b> | <b>48</b> | <b>0.0033</b>  | <b>1</b> | <b>K.FAGVDIR.V</b>                                                                                                                  |
| <a href="#">743</a>   | <b>971.5100</b> | <b>970.5027</b>  | <b>970.5124</b>  | <b>-0.0096</b> | <b>0</b> | <b>32</b> | <b>0.11</b>    | <b>1</b> | <b>K.SLVAYYQK.Y</b>                                                                                                                 |
| <a href="#">853</a>   | <b>496.9296</b> | <b>991.8447</b>  | <b>991.5087</b>  | <b>0.3360</b>  | <b>0</b> | <b>60</b> | <b>0.00017</b> | <b>1</b> | <b>K.QALVQYDR.T</b>                                                                                                                 |
| <a href="#">2714</a>  | 654.2921        | 1306.5697        | 1306.6704        | -0.1006        | 1        | 3         | 93             | 7        | M.ASVPSVQCFGKK.K                                                                                                                    |
| <a href="#">2790</a>  | <b>658.7271</b> | <b>1315.4397</b> | <b>1315.7387</b> | <b>-0.2990</b> | <b>0</b> | <b>37</b> | <b>0.031</b>   | <b>1</b> | <b>K.VYEPLLVGADK.F</b>                                                                                                              |
| <a href="#">3851</a>  | <b>716.6331</b> | <b>1431.2517</b> | <b>1430.7266</b> | <b>0.5251</b>  | <b>0</b> | <b>60</b> | <b>0.00018</b> | <b>1</b> | <b>R.VSGGGHTSQVYAIR.Q</b> <a href="#">3852</a>                                                                                      |
| <a href="#">5240</a>  | 791.5671        | 1581.1197        | 1581.8007        | -0.6810        | 2        | 6         | 35             | 6        | -.MASVPSVQCFGKKK.T                                                                                                                  |
| <a href="#">6288</a>  | <b>832.7456</b> | <b>1663.4767</b> | <b>1661.9464</b> | <b>1.5303</b>  | <b>0</b> | <b>55</b> | <b>0.00049</b> | <b>1</b> | <b>K.VNGQPLSLVQPEILR.F</b> <a href="#">6256</a> <a href="#">6290</a> <a href="#">6291</a> <a href="#">6292</a> <a href="#">6302</a> |
| <a href="#">11240</a> | 733.2445        | 2196.7117        | 2197.2080        | -0.4963        | 2        | 8         | 21             | 2        | R.VRVSGGGHTSQVYAIRQAIK.S                                                                                                            |
| <a href="#">12520</a> | 796.7349        | 2387.1827        | 2386.4060        | 0.7767         | 2        | 1         | 1e+02          | 4        | K.QGKGLIKVNGQPLSLVQPEILR.F                                                                                                          |

117. [gi|45477393|gb|AAS66016.1|](#) Mass: 43286 Score: 209 Queries matched: 24 emPAI: 0.67

methyltransferase B [Aspergillus parasiticus]

| Query                 | Observed        | Mr(expt)         | Mr(calc)         | Delta          | Miss     | Score     | Expect         | Rank     | Peptide                                                                                  |
|-----------------------|-----------------|------------------|------------------|----------------|----------|-----------|----------------|----------|------------------------------------------------------------------------------------------|
| <a href="#">649</a>   | <b>474.9836</b> | <b>947.9527</b>  | <b>947.5440</b>  | <b>0.4087</b>  | <b>0</b> | <b>45</b> | <b>0.0053</b>  | <b>1</b> | <b>R.TQAAFGLIK.E</b>                                                                     |
| <a href="#">843</a>   | 495.6116        | 989.2087         | 988.5706         | 0.6382         | 0        | 59        | 0.00023        | 1        | K.VGIDLGIFR.S <a href="#">842</a>                                                        |
| <a href="#">1185</a>  | <b>534.6666</b> | <b>1067.3187</b> | <b>1066.6386</b> | <b>0.6801</b>  | <b>0</b> | <b>39</b> | <b>0.02</b>    | <b>1</b> | <b>K.EQAILVAVPK.R</b> <a href="#">1186</a>                                               |
| <a href="#">1968</a>  | <b>607.3511</b> | <b>1212.6877</b> | <b>1212.7078</b> | <b>-0.0201</b> | <b>0</b> | <b>45</b> | <b>0.0056</b>  | <b>1</b> | <b>R.LSSGPLQVALTK.V</b>                                                                  |
| <a href="#">2033</a>  | 613.6811        | 1225.3477        | 1224.6060        | 0.7417         | 0        | 23        | 0.7            | 2        | M.TGLDMETIFAK.I                                                                          |
| <a href="#">3725</a>  | 709.2161        | 1416.4177        | 1414.7555        | 1.6622         | 0        | 51        | 0.0013         | 1        | K.ESDTPITLAEIVK.K <a href="#">3711</a>                                                   |
| <a href="#">4777</a>  | <b>769.3351</b> | <b>1536.6557</b> | <b>1534.7814</b> | <b>1.8743</b>  | <b>0</b> | <b>14</b> | <b>5.7</b>     | <b>1</b> | <b>K.VLMVDIGGGFGQSK.A</b> <a href="#">4744</a> <a href="#">4770</a> <a href="#">4784</a> |
| <a href="#">8525</a>  | 624.2709        | 1869.7907        | 1871.0615        | -1.2708        | 2        | 4         | 63             | 9        | R.SLKESDTPITLAEIVKK.T <a href="#">8516</a>                                               |
| <a href="#">8760</a>  | 632.3142        | 1893.9207        | 1890.9986        | 2.9221         | 1        | 2         | 77             | 9        | K.VLMVDIGGGFGQSKALR.A                                                                    |
| <a href="#">9813</a>  | <b>675.0902</b> | <b>2022.2487</b> | <b>2020.9175</b> | <b>1.3312</b>  | <b>0</b> | <b>54</b> | <b>0.00056</b> | <b>1</b> | <b>K.AFGSDLTMFEWMPQHPK.H</b> <a href="#">9804</a> <a href="#">9815</a>                   |
| <a href="#">10446</a> | 697.8545        | 2090.5417        | 2090.1306        | 0.4111         | 2        | 6         | 32             | 6        | K.VLMVDIGGGFGQSKALRAK.F                                                                  |



|                       |                  |                  |                  |                |          |           |                |          |                                                          |
|-----------------------|------------------|------------------|------------------|----------------|----------|-----------|----------------|----------|----------------------------------------------------------|
| <a href="#">10544</a> | <b>1052.5286</b> | <b>2103.0427</b> | <b>2103.0194</b> | <b>0.0233</b>  | <b>0</b> | <b>21</b> | <b>1.1</b>     | <b>1</b> | <b>R.AEWDDLMEQVGLEIIQSK.V</b>                            |
| <a href="#">12434</a> | 792.5785         | 2374.7137        | 2376.1631        | -1.4494        | 1        | 2         | 76             | 9        | R.TRAEWDDLMEQVGLEIIQSK.V                                 |
| <a href="#">13437</a> | <b>837.9532</b>  | <b>2510.8377</b> | <b>2511.4788</b> | <b>-0.6411</b> | <b>2</b> | <b>0</b>  | <b>1.1e+02</b> | <b>3</b> | <b>R.LSSGPLQVALTKVGIDLGIFRSLK.E</b>                      |
| <a href="#">15011</a> | <b>938.8859</b>  | <b>2813.6357</b> | <b>2814.2604</b> | <b>-0.6247</b> | <b>1</b> | <b>2</b>  | <b>70</b>      | <b>2</b> | <b>K.DCVFQKAFGSDLT<del>M</del>FEWMPQH<del>P</del>K.H</b> |

118. [gi|6177971|dbj|BAA86103.1|](#) Mass: 43298 Score: 209 Queries matched: 25 emPAI: 0.67

O-methyltransferase [Aspergillus parasiticus]

| Query                 | Observed         | Mr(expt)         | Mr(calc)         | Delta         | Miss     | Score     | Expect         | Rank     | Peptide                                                                                      |
|-----------------------|------------------|------------------|------------------|---------------|----------|-----------|----------------|----------|----------------------------------------------------------------------------------------------|
| <a href="#">649</a>   | 474.9836         | 947.9527         | 947.5440         | 0.4087        | 0        | 45        | 0.0053         | 1        | R.TQAAFGLIK.E                                                                                |
| <a href="#">843</a>   | 495.6116         | 989.2087         | 988.5706         | 0.6382        | 0        | 59        | 0.00023        | 1        | K.VGIDLGIFR.S <a href="#">842</a>                                                            |
| <a href="#">1185</a>  | 534.6666         | 1067.3187        | 1066.6386        | 0.6801        | 0        | 39        | 0.02           | 1        | K.EQAILVAVPK.R <a href="#">1186</a>                                                          |
| <a href="#">1968</a>  | 607.3511         | 1212.6877        | 1212.7078        | -0.0201       | 0        | 45        | 0.0056         | 1        | R.LSSGPLQVALTK.V                                                                             |
| <a href="#">3725</a>  | 709.2161         | 1416.4177        | 1414.7555        | 1.6622        | 0        | 51        | 0.0013         | 1        | K.ESDTPITLAEIVK.K <a href="#">3711</a>                                                       |
| <a href="#">4777</a>  | 769.3351         | 1536.6557        | 1534.7814        | 1.8743        | 0        | 14        | 5.7            | 1        | K.VLMVDIGGGFGQSK.A <a href="#">4744</a> <a href="#">4770</a> <a href="#">4784</a>            |
| <a href="#">5794</a>  | <b>813.6756</b>  | <b>1625.3367</b> | <b>1624.8568</b> | <b>0.4799</b> | <b>1</b> | <b>3</b>  | <b>70</b>      | <b>8</b> | <b>- .MTGLDMEIIFAKIK.E</b>                                                                   |
| <a href="#">8525</a>  | 624.2709         | 1869.7907        | 1871.0615        | -1.2708       | 2        | 4         | 63             | 9        | R.SLKESDTPITLAEIVKK.T <a href="#">8516</a>                                                   |
| <a href="#">8760</a>  | 632.3142         | 1893.9207        | 1890.9986        | 2.9221        | 1        | 2         | 77             | 9        | K.VLMVDIGGGFGQSKALR.A                                                                        |
| <a href="#">9813</a>  | <b>675.0902</b>  | <b>2022.2487</b> | <b>2020.9175</b> | <b>1.3312</b> | <b>0</b> | <b>54</b> | <b>0.00056</b> | <b>1</b> | <b>K.AFGSDLT<del>M</del>FEWMPQH<del>P</del>K.H</b> <a href="#">9804</a> <a href="#">9815</a> |
| <a href="#">10446</a> | 697.8545         | 2090.5417        | 2090.1306        | 0.4111        | 2        | 6         | 32             | 6        | K.VLMVDIGGGFGQSKALRAK.F                                                                      |
| <a href="#">10544</a> | <b>1052.5286</b> | <b>2103.0427</b> | <b>2103.0194</b> | <b>0.0233</b> | <b>0</b> | <b>21</b> | <b>1.1</b>     | <b>1</b> | <b>R.AEWDDLMEQVGLEIIQSK.V</b>                                                                |
| <a href="#">11743</a> | <b>759.4955</b>  | <b>2275.4647</b> | <b>2273.1435</b> | <b>2.3212</b> | <b>2</b> | <b>2</b>  | <b>81</b>      | <b>7</b> | <b>- .MTGLDMEIIFAKIKEEYAR.T</b>                                                              |
| <a href="#">12434</a> | 792.5785         | 2374.7137        | 2376.1631        | -1.4494       | 1        | 2         | 76             | 9        | R.TRAEWDDLMEQVGLEIIQSK.V                                                                     |
| <a href="#">13437</a> | 837.9532         | 2510.8377        | 2511.4788        | -0.6411       | 2        | 0         | 1.1e+02        | 3        | R.LSSGPLQVALTKVGIDLGIFRSLK.E                                                                 |
| <a href="#">15011</a> | 938.8859         | 2813.6357        | 2814.2604        | -0.6247       | 1        | 2         | 70             | 2        | K.DCVFQKAFGSDLT <del>M</del> FEWMPQH <del>P</del> K.H                                        |

Proteins matching the same set of peptides:

[gi|6177973|dbj|BAA86104.1|](#) Mass: 43298 Score: 209 Queries matched: 25

O-methyltransferase [Aspergillus parasiticus]

119. [gi|220695964|gb|EED52306.1|](#) Mass: 150551 Score: 208 Queries matched: 40 emPAI: 0.07

hydantoin utilization protein A, putative [Aspergillus flavus NRRL3357]

| Query                | Observed        | Mr(expt)        | Mr(calc)        | Delta         | Miss     | Score    | Expect    | Rank     | Peptide                         |
|----------------------|-----------------|-----------------|-----------------|---------------|----------|----------|-----------|----------|---------------------------------|
| <a href="#">360</a>  | 428.7006        | 855.3867        | 855.5290        | -0.1423       | 1        | 15       | 4.7       | 4        | K.VALEIRR.K <a href="#">368</a> |
| <a href="#">446</a>  | <b>881.4950</b> | <b>880.4877</b> | <b>880.3926</b> | <b>0.0951</b> | <b>0</b> | <b>7</b> | <b>26</b> | <b>7</b> | <b>R.EVGEYER.T</b>              |
| <a href="#">1576</a> | 567.9981        | 1133.9817       | 1134.5894       | -0.6077       | 1        | 1        | 1.3e+02   | 5        | R.GGNAQRTLYR.F                  |
| <a href="#">2150</a> | 415.4062        | 1243.1967       | 1243.6885       | -0.4917       | 1        | 3        | 77        | 9        | R.RETVVGD <del>L</del> TVR.S    |
| <a href="#">2974</a> | 668.6181        | 1335.2217       | 1333.7098       | 1.5120        | 1        | 7        | 30        | 5        | R.TMDVMQALIGKK.N                |
| <a href="#">3008</a> | 670.4551        | 1338.8957       | 1338.6754       | 0.2203        | 2        | 3        | 69        | 7        | R.DWFTRMKEVK.G                  |
| <a href="#">3240</a> | 681.7616        | 1361.5087       | 1360.6987       | 0.8101        | 1        | 4        | 63        | 3        | K.TLEATLWDREK.I                 |
| <a href="#">4175</a> | 734.8896        | 1467.7647       | 1464.7936       | 2.9711        | 1        | 0        | 1.4e+02   | 7        | K.SRENPPVEILPSK.C               |

|                       |                           |                           |                           |                         |                   |                    |                         |                   |                                                                                                                           |
|-----------------------|---------------------------|---------------------------|---------------------------|-------------------------|-------------------|--------------------|-------------------------|-------------------|---------------------------------------------------------------------------------------------------------------------------|
| <a href="#">4620</a>  | <a href="#">761.2316</a>  | <a href="#">1520.4487</a> | <a href="#">1518.7534</a> | <a href="#">1.6953</a>  | <a href="#">0</a> | <a href="#">47</a> | <a href="#">0.0033</a>  | <a href="#">1</a> | <a href="#">K.GVMNTDLVELLCR.N</a>                                                                                         |
| <a href="#">5296</a>  | <a href="#">793.8016</a>  | <a href="#">1585.5887</a> | <a href="#">1583.7476</a> | <a href="#">1.8411</a>  | <a href="#">0</a> | <a href="#">9</a>  | <a href="#">17</a>      | <a href="#">1</a> | <a href="#">K.YCLPNFELELMR.L</a> <a href="#">5283</a>                                                                     |
| <a href="#">5374</a>  | <a href="#">531.7742</a>  | <a href="#">1592.3007</a> | <a href="#">1591.8426</a> | <a href="#">0.4582</a>  | <a href="#">2</a> | <a href="#">9</a>  | <a href="#">20</a>      | <a href="#">2</a> | <a href="#">R.TMDVMQALIGKKNK.L</a>                                                                                        |
| <a href="#">6153</a>  | <a href="#">552.0962</a>  | <a href="#">1653.2667</a> | <a href="#">1654.9002</a> | <a href="#">-1.6335</a> | <a href="#">1</a> | <a href="#">2</a>  | <a href="#">90</a>      | <a href="#">8</a> | <a href="#">R.SPAVDIRTVGAGGGSIAK.Y</a>                                                                                    |
| <a href="#">6915</a>  | <a href="#">855.4481</a>  | <a href="#">1708.8817</a> | <a href="#">1709.0087</a> | <a href="#">-0.1270</a> | <a href="#">0</a> | <a href="#">55</a> | <a href="#">0.0005</a>  | <a href="#">1</a> | <a href="#">R.STPLIPTLVASALASIR.S</a> <a href="#">6923</a> <a href="#">6935</a> <a href="#">6937</a> <a href="#">6938</a> |
| <a href="#">6984</a>  | <a href="#">858.6241</a>  | <a href="#">1715.2337</a> | <a href="#">1714.9117</a> | <a href="#">0.3221</a>  | <a href="#">0</a> | <a href="#">94</a> | <a href="#">5.6e-08</a> | <a href="#">1</a> | <a href="#">K.MLVGQFGSFITQFLK.A</a>                                                                                       |
| <a href="#">8053</a>  | <a href="#">606.7615</a>  | <a href="#">1817.2627</a> | <a href="#">1817.9305</a> | <a href="#">-0.6678</a> | <a href="#">1</a> | <a href="#">5</a>  | <a href="#">48</a>      | <a href="#">8</a> | <a href="#">R.MSVNGESVIAVNKDALR.A</a>                                                                                     |
| <a href="#">8152</a>  | <a href="#">610.1735</a>  | <a href="#">1827.4987</a> | <a href="#">1825.9898</a> | <a href="#">1.5089</a>  | <a href="#">1</a> | <a href="#">9</a>  | <a href="#">19</a>      | <a href="#">1</a> | <a href="#">R.ETVVGDLTVRSPAVIDR.T</a>                                                                                     |
| <a href="#">8172</a>  | <a href="#">916.5801</a>  | <a href="#">1831.1457</a> | <a href="#">1828.9849</a> | <a href="#">2.1608</a>  | <a href="#">1</a> | <a href="#">7</a>  | <a href="#">28</a>      | <a href="#">3</a> | <a href="#">R.WFTKPWGIRGGKPGSR.S</a>                                                                                      |
| <a href="#">8251</a>  | <a href="#">614.8089</a>  | <a href="#">1841.4047</a> | <a href="#">1839.9553</a> | <a href="#">1.4494</a>  | <a href="#">0</a> | <a href="#">4</a>  | <a href="#">55</a>      | <a href="#">8</a> | <a href="#">R.FGSQIYLAACSELLLR.N</a>                                                                                      |
| <a href="#">8811</a>  | <a href="#">950.8856</a>  | <a href="#">1899.7567</a> | <a href="#">1899.0070</a> | <a href="#">0.7497</a>  | <a href="#">1</a> | <a href="#">4</a>  | <a href="#">60</a>      | <a href="#">7</a> | <a href="#">R.THLLGRMTDVMQALIGK.K</a>                                                                                     |
| <a href="#">9478</a>  | <a href="#">661.2739</a>  | <a href="#">1980.7997</a> | <a href="#">1982.0909</a> | <a href="#">-1.2912</a> | <a href="#">2</a> | <a href="#">4</a>  | <a href="#">50</a>      | <a href="#">4</a> | <a href="#">R.RETVVGDLTVRSPAVIDR.T</a> <a href="#">9485</a>                                                               |
| <a href="#">10313</a> | <a href="#">691.6225</a>  | <a href="#">2071.8457</a> | <a href="#">2071.0487</a> | <a href="#">0.7970</a>  | <a href="#">0</a> | <a href="#">1</a>  | <a href="#">94</a>      | <a href="#">4</a> | <a href="#">K.FQFIHHGTTTATNAVLEGG.G</a>                                                                                   |
| <a href="#">10838</a> | <a href="#">1073.6321</a> | <a href="#">2145.2497</a> | <a href="#">2144.1241</a> | <a href="#">1.1256</a>  | <a href="#">1</a> | <a href="#">4</a>  | <a href="#">50</a>      | <a href="#">3</a> | <a href="#">K.MLVGQFGSFITQFLKAWR.G</a>                                                                                    |
| <a href="#">12087</a> | <a href="#">773.6155</a>  | <a href="#">2317.8247</a> | <a href="#">2319.1284</a> | <a href="#">-1.3037</a> | <a href="#">0</a> | <a href="#">5</a>  | <a href="#">44</a>      | <a href="#">3</a> | <a href="#">R.ETGLPAPSAQWELDPYGPVHR.L</a> <a href="#">12092</a>                                                           |
| <a href="#">12318</a> | <a href="#">786.3162</a>  | <a href="#">2355.9267</a> | <a href="#">2355.2084</a> | <a href="#">0.7183</a>  | <a href="#">1</a> | <a href="#">4</a>  | <a href="#">44</a>      | <a href="#">1</a> | <a href="#">K.FQFIHHGTTTATNAVLEGGGAR.T</a>                                                                                |
| <a href="#">12365</a> | <a href="#">789.6869</a>  | <a href="#">2366.0387</a> | <a href="#">2367.2039</a> | <a href="#">-1.1651</a> | <a href="#">2</a> | <a href="#">1</a>  | <a href="#">92</a>      | <a href="#">8</a> | <a href="#">K.LYSKGMNTDLVELLCRNSR.Q</a>                                                                                   |
| <a href="#">12493</a> | <a href="#">795.4075</a>  | <a href="#">2383.2007</a> | <a href="#">2381.1322</a> | <a href="#">2.0685</a>  | <a href="#">0</a> | <a href="#">9</a>  | <a href="#">16</a>      | <a href="#">3</a> | <a href="#">R.LGADVGGTFTDICAFTPDGQIAR.A</a> <a href="#">12484</a> <a href="#">12501</a>                                   |
| <a href="#">13905</a> | <a href="#">861.8962</a>  | <a href="#">2582.6667</a> | <a href="#">2583.2322</a> | <a href="#">-0.5655</a> | <a href="#">2</a> | <a href="#">3</a>  | <a href="#">57</a>      | <a href="#">3</a> | <a href="#">R.QPDWYRSDLMAIIAACRTASSR.V</a>                                                                                |
| <a href="#">14121</a> | <a href="#">876.8559</a>  | <a href="#">2627.5457</a> | <a href="#">2626.3907</a> | <a href="#">1.1550</a>  | <a href="#">0</a> | <a href="#">9</a>  | <a href="#">14</a>      | <a href="#">1</a> | <a href="#">R.SQIPGGLGAWLHYTPPEPIVPLER.V</a>                                                                              |
| <a href="#">14425</a> | <a href="#">892.8212</a>  | <a href="#">2675.4417</a> | <a href="#">2673.1985</a> | <a href="#">2.2432</a>  | <a href="#">1</a> | <a href="#">6</a>  | <a href="#">28</a>      | <a href="#">1</a> | <a href="#">K.YMGITETMRVGPESAGASPGPACR.K</a>                                                                              |
| <a href="#">15023</a> | <a href="#">940.0735</a>  | <a href="#">2817.1987</a> | <a href="#">2817.4980</a> | <a href="#">-0.2992</a> | <a href="#">1</a> | <a href="#">4</a>  | <a href="#">41</a>      | <a href="#">2</a> | <a href="#">R.STPLIPTLVASALASIRSEMDTLMR.C</a>                                                                             |

120. [gi|220695968|gb|EED52310.1|](#) Mass: 46106 Score: 207 Queries matched: 12 emPAI: 0.32

flavohemoprotein [Aspergillus flavus NRRL3357]

| Query                 | Observed                 | Mr(expt)                  | Mr(calc)                  | Delta                   | Miss              | Score              | Expect                  | Rank              | Peptide                                                                 |
|-----------------------|--------------------------|---------------------------|---------------------------|-------------------------|-------------------|--------------------|-------------------------|-------------------|-------------------------------------------------------------------------|
| <a href="#">19</a>    | <a href="#">646.3760</a> | <a href="#">645.3687</a>  | <a href="#">645.3334</a>  | <a href="#">0.0354</a>  | <a href="#">0</a> | <a href="#">20</a> | <a href="#">2.6</a>     | <a href="#">1</a> | <a href="#">K.EGDVVK.V</a>                                              |
| <a href="#">1027</a>  | <a href="#">519.1646</a> | <a href="#">1036.3147</a> | <a href="#">1035.4985</a> | <a href="#">0.8162</a>  | <a href="#">0</a> | <a href="#">38</a> | <a href="#">0.025</a>   | <a href="#">1</a> | <a href="#">R.QYSLSDAPR.S</a>                                           |
| <a href="#">1337</a>  | <a href="#">548.5571</a> | <a href="#">1095.0997</a> | <a href="#">1094.4781</a> | <a href="#">0.6216</a>  | <a href="#">0</a> | <a href="#">11</a> | <a href="#">13</a>      | <a href="#">6</a> | <a href="#">K.QADGWTD<sup>FR</sup>.H</a> <a href="#">1348</a>           |
| <a href="#">2359</a>  | <a href="#">634.3261</a> | <a href="#">1266.6377</a> | <a href="#">1264.7391</a> | <a href="#">1.8987</a>  | <a href="#">0</a> | <a href="#">4</a>  | <a href="#">68</a>      | <a href="#">2</a> | <a href="#">M.PLSPEQIQLIK.A</a>                                         |
| <a href="#">3095</a>  | <a href="#">675.2011</a> | <a href="#">1348.3877</a> | <a href="#">1349.7191</a> | <a href="#">-1.3313</a> | <a href="#">2</a> | <a href="#">8</a>  | <a href="#">23</a>      | <a href="#">1</a> | <a href="#">R.AFKKDVDSLAEK.Y</a> <a href="#">3088</a>                   |
| <a href="#">12836</a> | <a href="#">811.5615</a> | <a href="#">2431.6627</a> | <a href="#">2431.2522</a> | <a href="#">0.4105</a>  | <a href="#">0</a> | <a href="#">61</a> | <a href="#">8.9e-05</a> | <a href="#">1</a> | <a href="#">K.VPESSEITSFYLEPVDGKPLPK.F</a> <a href="#">12841</a>        |
| <a href="#">13793</a> | <a href="#">854.5739</a> | <a href="#">2560.6997</a> | <a href="#">2559.3472</a> | <a href="#">1.3525</a>  | <a href="#">1</a> | <a href="#">29</a> | <a href="#">0.14</a>    | <a href="#">1</a> | <a href="#">K.KVPESSEITSFYLEPVDGKPLPK.F</a>                             |
| <a href="#">15395</a> | <a href="#">991.4799</a> | <a href="#">2971.4177</a> | <a href="#">2969.5320</a> | <a href="#">1.8857</a>  | <a href="#">0</a> | <a href="#">82</a> | <a href="#">7.2e-07</a> | <a href="#">1</a> | <a href="#">R.ALAGALFAYASHIDDLGALGPAVELICNK.H</a> <a href="#">15396</a> |

121. [gi|220700137|gb|EED56476.1|](#) Mass: 23161 Score: 205 Queries matched: 21 emPAI: 0.50

14-3-3 protein sigma, gamma, zeta, beta/alpha, putative [Aspergillus flavus NRRL3357]

| Query               | Observed                 | Mr(expt)                 | Mr(calc)                 | Delta                  | Miss              | Score             | Expect             | Rank              | Peptide                      |
|---------------------|--------------------------|--------------------------|--------------------------|------------------------|-------------------|-------------------|--------------------|-------------------|------------------------------|
| <a href="#">523</a> | <a href="#">454.5191</a> | <a href="#">907.0237</a> | <a href="#">906.5174</a> | <a href="#">0.5063</a> | <a href="#">0</a> | <a href="#">8</a> | <a href="#">25</a> | <a href="#">6</a> | <a href="#">R.NLLSVAYK.N</a> |

|                      |                 |                  |                  |                |          |           |                |          |                                                                                             |
|----------------------|-----------------|------------------|------------------|----------------|----------|-----------|----------------|----------|---------------------------------------------------------------------------------------------|
| <a href="#">575</a>  | 917.6150        | 916.6077         | 916.5229         | 0.0848         | 0        | 30        | 0.23           | 2        | R.IISSIEQK.E <a href="#">576</a>                                                            |
| <a href="#">919</a>  | <b>505.3621</b> | <b>1008.7097</b> | <b>1009.4498</b> | <b>-0.7401</b> | <b>1</b> | <b>10</b> | <b>16</b>      | <b>1</b> | <b>- .MTSERENK.T <a href="#">920</a></b>                                                    |
| <a href="#">1358</a> | 550.6921        | 1099.3697        | 1098.5345        | 0.8352         | 0        | 20        | 1.7            | 2        | R.YLAEFASGNK.R <a href="#">1357</a>                                                         |
| <a href="#">1509</a> | <b>563.6361</b> | <b>1125.2577</b> | <b>1124.5938</b> | <b>0.6639</b>  | <b>0</b> | <b>87</b> | <b>2.8e-07</b> | <b>1</b> | <b>K.GSEQHVSIIIR.D <a href="#">1510</a> <a href="#">1516</a> <a href="#">1517</a></b>       |
| <a href="#">2281</a> | 630.4501        | 1258.8857        | 1258.6669        | 0.2188         | 1        | 1         | 1.2e+02        | 10       | R.KVAATAAHEAYK.N                                                                            |
| <a href="#">3516</a> | 696.1961        | 1390.3777        | 1389.7351        | 0.6426         | 1        | 38        | 0.029          | 2        | R.IISSIEQKEESK.G                                                                            |
| <a href="#">4451</a> | <b>751.7161</b> | <b>1501.4177</b> | <b>1500.7420</b> | <b>0.6757</b>  | <b>0</b> | <b>5</b>  | <b>58</b>      | <b>1</b> | <b>K.EVANIGGELTVDER.N</b>                                                                   |
| <a href="#">8258</a> | <b>922.3011</b> | <b>1842.5877</b> | <b>1841.9445</b> | <b>0.6433</b>  | <b>0</b> | <b>88</b> | <b>2.1e-07</b> | <b>1</b> | <b>K.VCQDVLVDLDES LIPK.A <a href="#">8256</a> <a href="#">8257</a> <a href="#">8281</a></b> |
| <a href="#">9539</a> | 664.2909        | 1989.8507        | 1988.9197        | 0.9311         | 1        | 4         | 49             | 3        | R.DPELSRSCLPPCQAGFR.- <a href="#">9547</a>                                                  |
| <a href="#">9912</a> | 678.6132        | 2032.8177        | 2031.9973        | 0.8204         | 2        | 1         | 1.1e+02        | 3        | K.EESKGSEQHVSIIIRDYR.Q                                                                      |

122. [gi|220690102|gb|EED46452.1|](#) Mass: 22217 Score: 205 Queries matched: 20 emPAI: 1.68

40S ribosomal protein S9 [Aspergillus flavus NRRL3357]

| Query                | Observed  | Mr(expt)  | Mr(calc)  | Delta  | Miss | Score | Expect  | Rank | Peptide                                                                 |
|----------------------|-----------|-----------|-----------|--------|------|-------|---------|------|-------------------------------------------------------------------------|
| <a href="#">474</a>  | 888.5170  | 887.5097  | 887.4712  | 0.0385 | 0    | 47    | 0.0049  | 1    | R.IGVLDESR.M                                                            |
| <a href="#">512</a>  | 453.7811  | 905.5477  | 905.4971  | 0.0507 | 0    | 31    | 0.13    | 1    | K.IVGEYGLR.N <a href="#">514</a>                                        |
| <a href="#">524</a>  | 454.5571  | 907.0997  | 906.4447  | 0.6550 | 0    | 45    | 0.0058  | 1    | R.VEDFLER.R <a href="#">518</a> <a href="#">520</a> <a href="#">522</a> |
| <a href="#">1005</a> | 517.1206  | 1032.2267 | 1031.5764 | 0.6504 | 0    | 51    | 0.0014  | 1    | R.LFEGNALIR.R <a href="#">1004</a>                                      |
| <a href="#">1841</a> | 1189.3780 | 1188.3707 | 1187.6775 | 0.6933 | 1    | 3     | 98      | 6    | K.RLFEGNALIR.R                                                          |
| <a href="#">1910</a> | 602.5241  | 1203.0337 | 1201.7043 | 1.3294 | 1    | 1     | 1.4e+02 | 7    | K.LGLAKSIHHAR.V                                                         |
| <a href="#">2573</a> | 646.2231  | 1290.4317 | 1288.6962 | 1.7355 | 0    | 37    | 0.031   | 1    | K.QIVNVPSFMVR.L <a href="#">2566</a>                                    |
| <a href="#">2665</a> | 651.1496  | 1300.2847 | 1299.6922 | 0.5926 | 1    | 49    | 0.0021  | 1    | R.ELLTLDEKDPK.R <a href="#">2663</a>                                    |
| <a href="#">2708</a> | 436.1892  | 1305.5457 | 1303.7360 | 1.8097 | 2    | 3     | 87      | 6    | K.IVGEYGLRNKR.E                                                         |
| <a href="#">5430</a> | 800.1711  | 1598.3277 | 1597.8675 | 0.4602 | 2    | 4     | 58      | 8    | R.AARELLTLDEKDPK.R                                                      |
| <a href="#">7884</a> | 601.5439  | 1801.6097 | 1799.9067 | 1.7030 | 0    | 59    | 0.00018 | 1    | K.HIDFALTSPYGGGRPGR.V <a href="#">7878</a>                              |
| <a href="#">9610</a> | 998.8436  | 1995.6727 | 1995.1200 | 0.5527 | 2    | 4     | 60      | 7    | R.HIRVGKQIVNVPSFMVR.L                                                   |

123. [gi|220691722|gb|EED48070.1|](#) Mass: 99216 Score: 201 Queries matched: 27 emPAI: 0.18

aminopeptidase, putative [Aspergillus flavus NRRL3357]

| Query                | Observed  | Mr(expt)  | Mr(calc)  | Delta   | Miss | Score | Expect  | Rank | Peptide                                                     |
|----------------------|-----------|-----------|-----------|---------|------|-------|---------|------|-------------------------------------------------------------|
| <a href="#">15</a>   | 635.5770  | 634.5697  | 634.3438  | 0.2259  | 0    | 17    | 3.9     | 1    | K.EFALR.L                                                   |
| <a href="#">1170</a> | 533.7336  | 1065.4527 | 1065.4978 | -0.0451 | 0    | 6     | 39      | 3    | K.AEIFGEDGTK.I                                              |
| <a href="#">1235</a> | 1077.3320 | 1076.3247 | 1075.6026 | 0.7221  | 0    | 2     | 1.3e+02 | 9    | R.ASHPIEVPVK.N                                              |
| <a href="#">1670</a> | 576.8456  | 1151.6767 | 1149.6063 | 2.0704  | 1    | 2     | 84      | 10   | R.STKEIMLNSK.E                                              |
| <a href="#">2545</a> | 429.9452  | 1286.8137 | 1286.6904 | 0.1233  | 0    | 23    | 0.75    | 1    | K.LLIGMAGLAGDEK.V <a href="#">2537</a> <a href="#">2552</a> |
| <a href="#">3363</a> | 687.6366  | 1373.2587 | 1372.6775 | 0.5812  | 0    | 31    | 0.15    | 1    | K.SVLEWLQAHGYA.-                                            |
| <a href="#">3576</a> | 466.6292  | 1396.8657 | 1395.6882 | 1.1776  | 0    | 16    | 3.9     | 1    | K.ITQASEITYDQK.S <a href="#">3569</a>                       |
| <a href="#">3707</a> | 708.4396  | 1414.8647 | 1414.7854 | 0.0794  | 1    | 4     | 65      | 9    | R.KLLIGMAGLAGDEK.V                                          |
| <a href="#">3926</a> | 480.5212  | 1438.5417 | 1435.7307 | 2.8110  | 0    | 7     | 33      | 5    | R.SVFSQNESVAAGLK.E                                          |

|                       |           |           |           |         |   |     |         |   |                                                  |
|-----------------------|-----------|-----------|-----------|---------|---|-----|---------|---|--------------------------------------------------|
| <a href="#">4373</a>  | 746.3891  | 1490.7637 | 1492.7133 | -1.9495 | 1 | 0   | 1.4e+02 | 8 | R.RAFPCFDEPNLK.A                                 |
| <a href="#">5086</a>  | 784.1451  | 1566.2757 | 1565.7474 | 0.5283  | 0 | 1   | 1.1e+02 | 5 | K.TDTIHGVGQNSFYK.I                               |
| <a href="#">8872</a>  | 636.0619  | 1905.1637 | 1903.9680 | 1.1958  | 0 | 40  | 0.014   | 1 | K.NALEVDQIFDHISYLK.G                             |
| <a href="#">8982</a>  | 959.0931  | 1916.1717 | 1915.8952 | 0.2765  | 0 | 72  | 9e-06   | 1 | K.FADQSIGEDIASFFQNK.D <a href="#">8983</a>       |
| <a href="#">9173</a>  | 648.4579  | 1942.3517 | 1944.0601 | -1.7084 | 1 | 2   | 84      | 3 | K.LLIGMAGLAGDEKVITEAK.R <a href="#">9176</a>     |
| <a href="#">9281</a>  | 978.6871  | 1955.3597 | 1955.0728 | 0.2870  | 0 | 75  | 4.1e-06 | 1 | K.IGFPVITVAEEPSQISIR.Q                           |
| <a href="#">10177</a> | 1029.7346 | 2057.4547 | 2056.1602 | 1.2946  | 2 | 1   | 94      | 3 | R.KLLIGMAGLAGDEKVITEAK.R                         |
| <a href="#">10325</a> | 692.5235  | 2074.5487 | 2072.1551 | 2.3936  | 2 | (1) | 1.2e+02 | 8 | R.KLLIGMAGLAGDEKVITEAK.R                         |
| <a href="#">11745</a> | 759.5129  | 2275.5167 | 2274.1274 | 1.3893  | 2 | 2   | 74      | 4 | K.GQTALSNMPVKSERDGSSPGLK.V                       |
| <a href="#">12123</a> | 775.4999  | 2323.4777 | 2321.1950 | 2.2827  | 2 | 1   | 1.1e+02 | 7 | R.MLSDHLGRDTFLRGVANYLK.T                         |
| <a href="#">14113</a> | 876.2999  | 2625.8777 | 2625.2356 | 0.6422  | 0 | 0   | 1.1e+02 | 9 | K.ADLLAVHEFAMGAMENWGLVTYR.T                      |
| <a href="#">14144</a> | 879.2085  | 2634.6037 | 2632.3061 | 2.2976  | 0 | 27  | 0.23    | 1 | R.FLSTGDAKPEEDETWWIPLGIK.S <a href="#">14143</a> |

124. [gi|220701627|gb|EED57965.1|](#) Mass: 12422 Score: 199 Queries matched: 18 emPAI: 2.38

60S ribosomal protein L35Ae [Aspergillus flavus NRRL3357]

| Query                 | Observed | Mr(expt)  | Mr(calc)  | Delta   | Miss | Score | Expect  | Rank | Peptide                                                                                                   |
|-----------------------|----------|-----------|-----------|---------|------|-------|---------|------|-----------------------------------------------------------------------------------------------------------|
| <a href="#">127</a>   | 737.5570 | 736.5497  | 736.3868  | 0.1629  | 0    | 13    | 6.8     | 1    | K.SFGATVR.V                                                                                               |
| <a href="#">156</a>   | 378.1656 | 754.3167  | 753.4174  | 0.8994  | 0    | 31    | 0.099   | 1    | K.VAFVYR.A <a href="#">153</a> <a href="#">154</a> <a href="#">155</a>                                    |
| <a href="#">720</a>   | 966.5710 | 965.5637  | 965.4137  | 0.1500  | 0    | 8     | 21      | 4    | -.MPSEHGHR.L                                                                                              |
| <a href="#">1427</a>  | 557.3166 | 1112.6187 | 1112.6190 | -0.0002 | 0    | 44    | 0.0064  | 1    | R.QVNPNTSLIK.I <a href="#">1431</a>                                                                       |
| <a href="#">2473</a>  | 639.9976 | 1277.9807 | 1277.6953 | 0.2854  | 0    | 22    | 1.1     | 2    | K.VTRPHGNSGVVR.A                                                                                          |
| <a href="#">6509</a>  | 561.0272 | 1680.0597 | 1681.8471 | -1.7874 | 2    | 2     | 1e+02   | 8    | -.MPSEHGHRLLYVKGR.H                                                                                       |
| <a href="#">7091</a>  | 864.2296 | 1726.4447 | 1725.8210 | 0.6238  | 0    | 78    | 2.1e-06 | 1    | K.IDGVDNTEAANFYL GK.K <a href="#">7090</a> <a href="#">7095</a> <a href="#">7096</a> <a href="#">7101</a> |
| <a href="#">13042</a> | 822.5949 | 2464.7627 | 2466.3469 | -1.5842 | 2    | 4     | 51      | 1    | K.VTRPHGNSGVVRAQFRHNLPPK.S                                                                                |
| <a href="#">13941</a> | 864.1509 | 2589.4307 | 2589.3227 | 0.1080  | 2    | 42    | 0.0077  | 1    | K.IDGVDNTEAANFYL GK K VAFVYR.A <a href="#">13942</a>                                                      |

125. [gi|220700627|gb|EED56965.1|](#) Mass: 118573 Score: 198 Queries matched: 20 emPAI: 0.11

translation elongation factor eEF-3, putative [Aspergillus flavus NRRL3357]

| Query                | Observed | Mr(expt)  | Mr(calc)  | Delta   | Miss | Score | Expect  | Rank | Peptide                                  |
|----------------------|----------|-----------|-----------|---------|------|-------|---------|------|------------------------------------------|
| <a href="#">50</a>   | 678.5450 | 677.5377  | 677.3279  | 0.2099  | 1    | 14    | 7.3     | 2    | K.ERMAR.K                                |
| <a href="#">291</a>  | 415.1411 | 828.2677  | 829.4154  | -1.1477 | 1    | 7     | 37      | 6    | K.DANARQR.A <a href="#">288</a>          |
| <a href="#">376</a>  | 858.5550 | 857.5477  | 858.5215  | -0.9737 | 0    | 8     | 33      | 9    | R.FIPELIK.C                              |
| <a href="#">631</a>  | 470.1831 | 938.3517  | 936.5617  | 1.7900  | 1    | 5     | 43      | 2    | R.RVIGIHSR.R                             |
| <a href="#">705</a>  | 964.6570 | 963.6497  | 963.4444  | 0.2054  | 1    | 8     | 26      | 6    | R.ETMDRANK.I                             |
| <a href="#">2313</a> | 632.2296 | 1262.4447 | 1263.6315 | -1.1868 | 1    | 6     | 46      | 8    | R.KSAVIVDNMCK.L                          |
| <a href="#">3373</a> | 688.1651 | 1374.3157 | 1372.7020 | 1.6137  | 0    | 2     | 1.2e+02 | 2    | -.MPAAAASSVPAVSSK.E <a href="#">3361</a> |
| <a href="#">4980</a> | 518.9242 | 1553.7507 | 1554.6548 | -0.9041 | 0    | 2     | 85      | 4    | R.SYYELGASDMEFK.F                        |
| <a href="#">5084</a> | 783.9576 | 1565.9007 | 1564.8865 | 1.0142  | 0    | 71    | 1.1e-05 | 1    | K.LVEDPQIVAPFLPK.L <a href="#">5074</a>  |
| <a href="#">5164</a> | 787.5086 | 1573.0027 | 1570.8943 | 2.1084  | 1    | 2     | 99      | 8    | K.EALASGQFRPLVRK.E                       |

|                       |                 |                  |                  |               |          |           |                |          |                                                            |
|-----------------------|-----------------|------------------|------------------|---------------|----------|-----------|----------------|----------|------------------------------------------------------------|
| <a href="#">6087</a>  | 825.2571        | 1648.4997        | 1646.9032        | 1.5965        | 2        | 3         | 80             | 10       | K.FPEPGFLEGVKTAK.A                                         |
| <a href="#">7098</a>  | <b>864.7376</b> | <b>1727.4607</b> | <b>1726.8964</b> | <b>0.5643</b> | <b>0</b> | <b>57</b> | <b>0.00027</b> | <b>1</b> | <b>R.VPALIPAVSEAMWDTK.A</b>                                |
| <a href="#">7715</a>  | <b>893.3631</b> | <b>1784.7117</b> | <b>1783.9931</b> | <b>0.7186</b> | <b>0</b> | <b>61</b> | <b>0.00012</b> | <b>1</b> | <b>K.IPEISTAGDISTVAGILK.E</b>                              |
| <a href="#">14157</a> | <b>880.2259</b> | <b>2637.6557</b> | <b>2637.2269</b> | <b>0.4289</b> | <b>0</b> | <b>2</b>  | <b>76</b>      | <b>7</b> | <b>K.TVYVEHDLDSADTEQTVIGWTMK.K</b>                         |
| <a href="#">14808</a> | <b>919.7319</b> | <b>2756.1737</b> | <b>2755.2727</b> | <b>0.9010</b> | <b>1</b> | <b>3</b>  | <b>56</b>      | <b>4</b> | <b>R.SYYELGASDMEFKFPEPGFLEGVK.T</b>                        |
| <a href="#">14857</a> | <b>924.5392</b> | <b>2770.5957</b> | <b>2768.4345</b> | <b>2.1612</b> | <b>0</b> | <b>43</b> | <b>0.0059</b>  | <b>1</b> | <b>K.STLVNVLTGELIPTTGDVYQHENIR.I</b> <a href="#">14855</a> |

126. [gi|220690663|gb|EED47012.1|](#) Mass: 16599 Score: 197 Queries matched: 22 emPAI: 3.40

40S ribosomal protein S19 [Aspergillus flavus NRRL3357]

| Query                 | Observed         | Mr(expt)         | Mr(calc)         | Delta          | Miss     | Score     | Expect         | Rank     | Peptide                                                                                    |
|-----------------------|------------------|------------------|------------------|----------------|----------|-----------|----------------|----------|--------------------------------------------------------------------------------------------|
| <a href="#">262</a>   | 816.5500         | 815.5427         | 815.4752         | 0.0675         | 0        | 16        | 4.9            | 2        | K.VIQSLEK.I <a href="#">271</a>                                                            |
| <a href="#">805</a>   | <b>492.6636</b>  | <b>983.3127</b>  | <b>984.6192</b>  | <b>-1.3065</b> | <b>2</b> | <b>9</b>  | <b>19</b>      | <b>9</b> | <b>R.KTVGVGRLR.K</b>                                                                       |
| <a href="#">1648</a>  | <b>573.8831</b>  | <b>1145.7517</b> | <b>1145.6121</b> | <b>0.1396</b>  | <b>0</b> | <b>50</b> | <b>0.0018</b>  | <b>1</b> | <b>K.FISAYS AFLK.R</b> <a href="#">1647</a> <a href="#">1651</a>                           |
| <a href="#">1745</a>  | <b>1169.9070</b> | <b>1168.8997</b> | <b>1167.5771</b> | <b>1.3226</b>  | <b>0</b> | <b>30</b> | <b>0.16</b>    | <b>1</b> | <b>K.IGVLEHDEEK.G</b>                                                                      |
| <a href="#">2029</a>  | <b>613.2091</b>  | <b>1224.4037</b> | <b>1223.6914</b> | <b>0.7123</b>  | <b>0</b> | <b>49</b> | <b>0.0021</b>  | <b>1</b> | <b>K.LPIPGWVDTVK.T</b> <a href="#">2026</a> <a href="#">2033</a>                           |
| <a href="#">2748</a>  | <b>655.9086</b>  | <b>1309.8027</b> | <b>1309.4681</b> | <b>0.3346</b>  | <b>0</b> | <b>75</b> | <b>5.3e-06</b> | <b>1</b> | <b>K.TTVDEEEEDDE.-</b> <a href="#">2743</a> <a href="#">2747</a>                           |
| <a href="#">3569</a>  | 466.3235         | 1395.9487        | 1397.8255        | -1.8768        | 2        | 10        | 16             | 3        | R.HIYLRKTVGVGR.L                                                                           |
| <a href="#">5649</a>  | 539.1479         | 1614.4217        | 1614.8882        | -0.4665        | 2        | 5         | 47             | 6        | K.FISAYS AFLKRQ GK.L                                                                       |
| <a href="#">6691</a>  | <b>846.7836</b>  | <b>1691.5527</b> | <b>1689.7932</b> | <b>1.7596</b>  | <b>0</b> | <b>60</b> | <b>0.00015</b> | <b>1</b> | <b>R.GSRPNHHVDASGSVDR.K</b> <a href="#">6671</a> <a href="#">6672</a> <a href="#">6684</a> |
| <a href="#">8067</a>  | <b>910.1356</b>  | <b>1818.2567</b> | <b>1817.8881</b> | <b>0.3686</b>  | <b>1</b> | <b>21</b> | <b>1.3</b>     | <b>1</b> | <b>R.GSRPNHHVDASGSVDRK.V</b> <a href="#">8087</a>                                          |
| <a href="#">11259</a> | <b>1101.0466</b> | <b>2200.0787</b> | <b>2198.9691</b> | <b>1.1096</b>  | <b>0</b> | <b>26</b> | <b>0.34</b>    | <b>2</b> | <b>K.TSCSNELPPQNADWYYVR.A</b>                                                              |

127. [gi|220690399|gb|EED46748.1|](#) Mass: 54426 Score: 195 Queries matched: 26 emPAI: 0.12

seryl-tRNA synthetase [Aspergillus flavus NRRL3357]

| Query                 | Observed        | Mr(expt)         | Mr(calc)         | Delta          | Miss     | Score      | Expect         | Rank     | Peptide                                                       |
|-----------------------|-----------------|------------------|------------------|----------------|----------|------------|----------------|----------|---------------------------------------------------------------|
| <a href="#">397</a>   | 864.5030        | 863.4957         | 863.4348         | 0.0609         | 1        | 7          | 36             | 8        | K.DSTSQKAK.G                                                  |
| <a href="#">1484</a>  | 561.5856        | 1121.1567        | 1119.5295        | 1.6272         | 0        | 9          | 20             | 4        | K.EDASSLLEEK.A                                                |
| <a href="#">1547</a>  | <b>566.1836</b> | <b>1130.3527</b> | <b>1129.5979</b> | <b>0.7549</b>  | <b>1</b> | <b>12</b>  | <b>12</b>      | <b>2</b> | <b>K.KDAEDLALQK.E</b> <a href="#">1548</a>                    |
| <a href="#">2489</a>  | <b>641.0266</b> | <b>1280.0387</b> | <b>1280.6071</b> | <b>-0.5684</b> | <b>0</b> | <b>1</b>   | <b>1.3e+02</b> | <b>4</b> | <b>-.MLDIADFVSDR.G</b>                                        |
| <a href="#">2670</a>  | <b>651.6081</b> | <b>1301.2017</b> | <b>1300.6663</b> | <b>0.5354</b>  | <b>0</b> | <b>13</b>  | <b>9.5</b>     | <b>2</b> | <b>K.TWVPENVTVEK.R</b>                                        |
| <a href="#">3242</a>  | 682.0836        | 1362.1527        | 1361.6674        | 0.4853         | 1        | 10         | 15             | 5        | K.NKEDASSLLEEK.A <a href="#">3249</a>                         |
| <a href="#">3555</a>  | 465.8935        | 1394.6587        | 1391.6640        | 2.9947         | 1        | 5          | 53             | 7        | K.QSSKAASGAEATR.K                                             |
| <a href="#">4423</a>  | <b>749.3591</b> | <b>1496.7037</b> | <b>1494.7758</b> | <b>1.9279</b>  | <b>0</b> | <b>19</b>  | <b>1.8</b>     | <b>1</b> | <b>K.YIPGAPEFLPYTK.E</b>                                      |
| <a href="#">6868</a>  | <b>853.5061</b> | <b>1704.9977</b> | <b>1706.8661</b> | <b>-1.8684</b> | <b>0</b> | <b>(2)</b> | <b>98</b>      | <b>4</b> | <b>R.YEVMQIGSQLNGLQK.E</b>                                    |
| <a href="#">6964</a>  | 857.7146        | 1713.4147        | 1714.8962        | -1.4814        | 2        | 2          | 89             | 3        | K.AASGAEATRKIQDLR.V                                           |
| <a href="#">7058</a>  | 862.7051        | 1723.3957        | 1722.8611        | 0.5347         | 0        | 3          | 75             | 4        | R.YEVMQIGSQLNGLQK.E <a href="#">7041</a> <a href="#">7062</a> |
| <a href="#">8994</a>  | 959.8036        | 1917.5927        | 1917.8791        | -0.2864        | 2        | 9          | 19             | 2        | K.YAGYSTCYRKEAGAHGK.D <a href="#">9004</a>                    |
| <a href="#">9027</a>  | <b>641.7172</b> | <b>1922.1297</b> | <b>1919.9094</b> | <b>2.2203</b>  | <b>1</b> | <b>1</b>   | <b>1.2e+02</b> | <b>7</b> | <b>K.KYDLEAWFPFGQGEYK.E</b>                                   |
| <a href="#">10906</a> | <b>718.8502</b> | <b>2153.5287</b> | <b>2155.0264</b> | <b>-1.4977</b> | <b>1</b> | <b>5</b>   | <b>42</b>      | <b>2</b> | <b>K.GYKPNQPPQFMLKDMAK.T</b> <a href="#">10937</a>            |

|                       |                  |                  |                  |                |          |           |                |          |                                   |                       |                       |                       |
|-----------------------|------------------|------------------|------------------|----------------|----------|-----------|----------------|----------|-----------------------------------|-----------------------|-----------------------|-----------------------|
| <a href="#">11375</a> | <b>1108.7701</b> | <b>2215.5257</b> | <b>2215.2212</b> | <b>0.3045</b>  | <b>0</b> | <b>93</b> | <b>6.2e-08</b> | <b>1</b> | <b>K.SLGLPYQIVTIVSGALNNAASK.K</b> | <a href="#">11376</a> | <a href="#">11380</a> | <a href="#">11385</a> |
| <a href="#">12051</a> | <b>771.9475</b>  | <b>2312.8207</b> | <b>2311.0651</b> | <b>1.7556</b>  | <b>1</b> | <b>0</b>  | <b>1.2e+02</b> | <b>7</b> | <b>R.DCLSHHEVLTRLDGYDPER.G</b>    |                       |                       |                       |
| <a href="#">14985</a> | <b>935.7739</b>  | <b>2804.2997</b> | <b>2804.4028</b> | <b>-0.1031</b> | <b>2</b> | <b>1</b>  | <b>92</b>      | <b>9</b> | <b>K.TWVPENVTVKRDCLSHHEVLTR.L</b> |                       |                       |                       |

128. [gi|220690053|gb|EED46403.1|](#) Mass: 57832 Score: 191 Queries matched: 30 emPAI: 0.18

ATP sulphurylase [Aspergillus flavus NRRL3357]

| Query                 | Observed        | Mr(expt)         | Mr(calc)         | Delta          | Miss     | Score      | Expect         | Rank     | Peptide                                                                                                                                                                       |
|-----------------------|-----------------|------------------|------------------|----------------|----------|------------|----------------|----------|-------------------------------------------------------------------------------------------------------------------------------------------------------------------------------|
| <a href="#">1245</a>  | <b>540.1241</b> | <b>1078.2337</b> | <b>1077.6070</b> | <b>0.6267</b>  | <b>0</b> | <b>20</b>  | <b>1.6</b>     | <b>1</b> | <b>R.IAFVASELTK.A</b>                                                                                                                                                         |
| <a href="#">1413</a>  | <b>555.3251</b> | <b>1108.6357</b> | <b>1107.6189</b> | <b>1.0168</b>  | <b>0</b> | <b>9</b>   | <b>21</b>      | <b>9</b> | <b>R.EAIWHAIIR.K</b> <a href="#">1406</a>                                                                                                                                     |
| <a href="#">1734</a>  | 584.4016        | 1166.7887        | 1167.5745        | -0.7857        | 1        | 9          | 19             | 4        | R.EDRHTNIQR.I                                                                                                                                                                 |
| <a href="#">1829</a>  | 594.0741        | 1186.1337        | 1185.6982        | 0.4355         | 1        | 6          | 44             | 8        | R.VRAYQALLPR.Y                                                                                                                                                                |
| <a href="#">2295</a>  | <b>631.5491</b> | <b>1261.0837</b> | <b>1260.6098</b> | <b>0.4739</b>  | <b>0</b> | <b>4</b>   | <b>69</b>      | <b>5</b> | <b>R.HELSSELGFSR.E</b>                                                                                                                                                        |
| <a href="#">2339</a>  | <b>633.6191</b> | <b>1265.2237</b> | <b>1262.6407</b> | <b>2.5830</b>  | <b>0</b> | <b>0</b>   | <b>1.5e+02</b> | <b>8</b> | <b>K.LNHYDYVALR.Y</b>                                                                                                                                                         |
| <a href="#">2512</a>  | 642.7016        | 1283.3887        | 1283.6946        | -0.3059        | 0        | 7          | 34             | 6        | R.ALQVTLNQQGGR.A <a href="#">2521</a>                                                                                                                                         |
| <a href="#">3748</a>  | <b>710.9846</b> | <b>1419.9547</b> | <b>1418.7769</b> | <b>1.1778</b>  | <b>0</b> | <b>71</b>  | <b>1.1e-05</b> | <b>1</b> | <b>R.NLAILTIDDIYR.A</b> <a href="#">3746</a>                                                                                                                                  |
| <a href="#">5744</a>  | 811.8551        | 1621.6957        | 1621.8511        | -0.1554        | 1        | 10         | 14             | 3        | R.MGGPREAIWHAIIR.K <a href="#">5745</a> <a href="#">5765</a>                                                                                                                  |
| <a href="#">6469</a>  | <b>839.2366</b> | <b>1676.4587</b> | <b>1674.8949</b> | <b>1.5638</b>  | <b>0</b> | <b>36</b>  | <b>0.036</b>   | <b>1</b> | <b>R.YPNGMAVLGLLGLAMR.M</b> <a href="#">6439</a> <a href="#">6457</a> <a href="#">6472</a> <a href="#">6476</a> <a href="#">6478</a> <a href="#">6483</a> <a href="#">648</a> |
| <a href="#">6688</a>  | <b>846.7061</b> | <b>1691.3977</b> | <b>1690.8898</b> | <b>0.5079</b>  | <b>0</b> | <b>(2)</b> | <b>89</b>      | <b>3</b> | <b>R.YPNGMAVLGLLGLAMR.M</b>                                                                                                                                                   |
| <a href="#">6695</a>  | 846.8921        | 1691.7697        | 1690.8898        | 0.8799         | 0        | (5)        | 49             | 2        | R.YPNGMAVLGLLGLAMR.M                                                                                                                                                          |
| <a href="#">6728</a>  | <b>565.8189</b> | <b>1694.4347</b> | <b>1692.8947</b> | <b>1.5400</b>  | <b>0</b> | <b>38</b>  | <b>0.023</b>   | <b>1</b> | <b>K.AGAAVIAAPIAPYEHSR.K</b> <a href="#">6730</a>                                                                                                                             |
| <a href="#">6927</a>  | <b>570.8542</b> | <b>1709.5407</b> | <b>1706.8848</b> | <b>2.6560</b>  | <b>0</b> | <b>(7)</b> | <b>29</b>      | <b>5</b> | <b>R.YPNGMAVLGLLGLAMR.M</b>                                                                                                                                                   |
| <a href="#">8200</a>  | <b>918.3351</b> | <b>1834.6557</b> | <b>1834.9485</b> | <b>-0.2928</b> | <b>2</b> | <b>0</b>   | <b>1.4e+02</b> | <b>9</b> | <b>R.VVAFQTRNPMHRAHR.E</b>                                                                                                                                                    |
| <a href="#">8826</a>  | <b>634.6682</b> | <b>1900.9827</b> | <b>1898.9949</b> | <b>1.9878</b>  | <b>1</b> | <b>5</b>   | <b>44</b>      | <b>2</b> | <b>K.DEVPAGVKTLDISGTEL.R.N</b>                                                                                                                                                |
| <a href="#">11298</a> | 736.8465        | 2207.5177        | 2205.1221        | 2.3957         | 1        | 3          | 72             | 6        | R.YPNGMAVLGLLGLAMRMGGPR.E                                                                                                                                                     |

129. [gi|220692783|gb|EED49129.1|](#) Mass: 58156 Score: 188 Queries matched: 19 emPAI: 0.12

IMP dehydrogenase, putative [Aspergillus flavus NRRL3357]

| Query                 | Observed         | Mr(expt)         | Mr(calc)         | Delta          | Miss     | Score     | Expect         | Rank     | Peptide                                                                                               |
|-----------------------|------------------|------------------|------------------|----------------|----------|-----------|----------------|----------|-------------------------------------------------------------------------------------------------------|
| <a href="#">1147</a>  | 530.6561         | 1059.2977        | 1058.6448        | 0.6529         | 1        | 7         | 36             | 8        | R.SKLVGIVTSR.D                                                                                        |
| <a href="#">1504</a>  | <b>1125.6090</b> | <b>1124.6017</b> | <b>1124.4842</b> | <b>0.1175</b>  | <b>0</b> | <b>6</b>  | <b>35</b>      | <b>9</b> | <b>R.GMGSIAMEDK.K</b>                                                                                 |
| <a href="#">2888</a>  | 664.4331         | 1326.8517        | 1328.6870        | -1.8353        | 1        | 4         | 60             | 2        | M.PISNGDALGRAMK.A <a href="#">2887</a> <a href="#">2890</a> <a href="#">2894</a> <a href="#">2903</a> |
| <a href="#">4058</a>  | <b>727.7386</b>  | <b>1453.4627</b> | <b>1451.7732</b> | <b>1.6895</b>  | <b>0</b> | <b>66</b> | <b>4.1e-05</b> | <b>1</b> | <b>R.EQAAPLIAAGADGLR.I</b> <a href="#">4052</a> <a href="#">4072</a>                                  |
| <a href="#">4271</a>  | <b>739.7751</b>  | <b>1477.5357</b> | <b>1475.7224</b> | <b>1.8133</b>  | <b>1</b> | <b>2</b>  | <b>88</b>      | <b>9</b> | <b>- .MPISNGDALGRAMK.A</b>                                                                            |
| <a href="#">4910</a>  | <b>774.8266</b>  | <b>1547.6387</b> | <b>1547.7652</b> | <b>-0.1264</b> | <b>2</b> | <b>3</b>  | <b>79</b>      | <b>3</b> | <b>K.AGAGSKDSKASNAGTAR.Y</b>                                                                          |
| <a href="#">6229</a>  | 830.7866         | 1659.5587        | 1658.7756        | 0.7831         | 2        | 8         | 23             | 3        | K.AYRGMGSIAAMEDKK.A <a href="#">6263</a>                                                              |
| <a href="#">6675</a>  | 846.3061         | 1690.5977        | 1689.8978        | 0.7000         | 0        | 5         | 51             | 3        | R.YENGFILDPVVLSPK.A                                                                                   |
| <a href="#">8556</a>  | 625.4719         | 1873.3937        | 1871.0477        | 2.3461         | 1        | 5         | 46             | 3        | R.VLVAQGVSGSVLDRGVSVK.F                                                                               |
| <a href="#">14431</a> | <b>893.0702</b>  | <b>2676.1887</b> | <b>2674.3353</b> | <b>1.8534</b>  | <b>0</b> | <b>56</b> | <b>0.00025</b> | <b>1</b> | <b>R.IGMGSGSACTIQEVMVGRPQAI SVR.S</b> <a href="#">14423</a>                                           |
| <a href="#">16163</a> | <b>1113.5005</b> | <b>3337.4797</b> | <b>3334.7126</b> | <b>2.7672</b>  | <b>0</b> | <b>18</b> | <b>1.3</b>     | <b>1</b> | <b>K.HGALTYNDFLILPGYIGFPASDVTLDTPVTK.R</b>                                                            |



130. [gi|220695604|gb|EED51947.1|](#) Mass: 28984 Score: 187 Queries matched: 7 empAI: 0.24

HAD superfamily hydrolase, putative [Aspergillus flavus NRRL3357]

| Query                | Observed  | Mr(expt)  | Mr(calc)  | Delta   | Miss | Score | Expect  | Rank | Peptide                                                                             |
|----------------------|-----------|-----------|-----------|---------|------|-------|---------|------|-------------------------------------------------------------------------------------|
| <a href="#">1142</a> | 1059.5770 | 1058.5697 | 1058.5971 | -0.0274 | 2    | 6     | 52      | 6    | K.KEEDKVIAK.L                                                                       |
| <a href="#">2689</a> | 652.2311  | 1302.4477 | 1301.7092 | 0.7386  | 0    | 5     | 59      | 2    | K.YHLAVVSSSALR.R                                                                    |
| <a href="#">3218</a> | 681.2291  | 1360.4437 | 1358.7843 | 1.6594  | 1    | 5     | 48      | 6    | K.LLKELGAEVIMK.D                                                                    |
| <a href="#">8946</a> | 958.1541  | 1914.2937 | 1913.9272 | 0.3665  | 0    | 87    | 2.7e-07 | 1    | R.YTGEQLIQDFVQGNFR.G <a href="#">8960</a> <a href="#">8969</a> <a href="#">8974</a> |

131. [gi|220690412|gb|EED46761.1|](#) Mass: 16949 Score: 187 Queries matched: 19 empAI: 1.07

60S ribosomal protein L23 [Aspergillus flavus NRRL3357]

| Query                | Observed  | Mr(expt)  | Mr(calc)  | Delta   | Miss | Score | Expect  | Rank | Peptide                                                                                               |
|----------------------|-----------|-----------|-----------|---------|------|-------|---------|------|-------------------------------------------------------------------------------------------------------|
| <a href="#">105</a>  | 718.5250  | 717.5177  | 717.4021  | 0.1156  | 0    | 20    | 2.5     | 1    | K.TLELSR.S <a href="#">104</a>                                                                        |
| <a href="#">657</a>  | 476.8446  | 951.6747  | 951.4913  | 0.1834  | 0    | 41    | 0.012   | 1    | K.LYDVDTVK.V <a href="#">658</a>                                                                      |
| <a href="#">1130</a> | 1057.2290 | 1056.2217 | 1055.5723 | 0.6494  | 2    | 6     | 39      | 3    | M.APKADNKQ GK.T                                                                                       |
| <a href="#">3949</a> | 722.2026  | 1442.3907 | 1441.7664 | 0.6243  | 0    | 67    | 3.2e-05 | 1    | R.LTPDVDALDIAATK.L <a href="#">3957</a> <a href="#">3971</a>                                          |
| <a href="#">4271</a> | 739.7751  | 1477.5357 | 1477.7850 | -0.2493 | 0    | (43)  | 0.0085  | 1    | K.VILYPLNTESAMK.K <a href="#">4289</a>                                                                |
| <a href="#">4413</a> | 748.7441  | 1495.4737 | 1493.7799 | 1.6938  | 0    | 44    | 0.0061  | 1    | K.VILYPLNTESAMK.K <a href="#">4404</a> <a href="#">4407</a> <a href="#">4412</a> <a href="#">4421</a> |
| <a href="#">5285</a> | 793.3386  | 1584.6627 | 1582.9155 | 1.7473  | 2    | 6     | 40      | 1    | K.TKPSDRAGAAKAVLK.G                                                                                   |
| <a href="#">5787</a> | 813.2991  | 1624.5837 | 1621.8749 | 2.7088  | 1    | 2     | 1e+02   | 9    | K.VILYPLNTESAMKK.I                                                                                    |
| <a href="#">5882</a> | 817.6506  | 1633.2867 | 1631.8770 | 1.4097  | 0    | 2     | 96      | 3    | K.IEENNTLVFIVDVK.A                                                                                    |
| <a href="#">7409</a> | 881.3021  | 1760.5897 | 1759.9720 | 0.6177  | 1    | 4     | 65      | 1    | K.KIEENNTLVFIVDVK.A                                                                                   |

132. [gi|220700002|gb|EED56341.1|](#) Mass: 58413 Score: 187 Queries matched: 36 empAI: 0.32

14-alpha sterol demethylase Cyp51A [Aspergillus flavus NRRL3357]

| Query                | Observed | Mr(expt)  | Mr(calc)  | Delta   | Miss | Score | Expect  | Rank | Peptide                                                        |
|----------------------|----------|-----------|-----------|---------|------|-------|---------|------|----------------------------------------------------------------|
| <a href="#">443</a>  | 440.1896 | 878.3647  | 878.4749  | -0.1102 | 0    | 12    | 12      | 10   | K.EVLDYLK.T                                                    |
| <a href="#">2739</a> | 655.5511 | 1309.0877 | 1308.6463 | 0.4415  | 0    | 32    | 0.086   | 1    | K.GTSSPYLPFGAGR.H <a href="#">2738</a>                         |
| <a href="#">4743</a> | 767.4426 | 1532.8707 | 1530.8770 | 1.9938  | 0    | 36    | 0.04    | 1    | R.DLDDLPLHQNLK.E                                               |
| <a href="#">5212</a> | 527.2382 | 1578.6927 | 1576.9235 | 1.7692  | 2    | 2     | 86      | 6    | R.LHLSIHSMLMRVK.N <a href="#">5211</a>                         |
| <a href="#">5241</a> | 528.0642 | 1581.1707 | 1581.7643 | -0.5936 | 1    | 12    | 8.2     | 3    | R.MREIYMDIINER.R <a href="#">5271</a>                          |
| <a href="#">5384</a> | 797.8286 | 1593.6427 | 1594.8137 | -1.1710 | 2    | 6     | 33      | 4    | R.EIYMDIINERRK.N                                               |
| <a href="#">5946</a> | 547.1579 | 1638.4517 | 1639.8756 | -1.4239 | 0    | 6     | 39      | 3    | K.FAYVNLGVIVATMAR.H                                            |
| <a href="#">7210</a> | 871.1876 | 1740.3607 | 1737.8654 | 2.4953  | 2    | 4     | 63      | 3    | R.MREIYMDIINERR.K                                              |
| <a href="#">7362</a> | 586.4289 | 1756.2647 | 1753.8603 | 2.4044  | 2    | (4)   | 65      | 6    | R.MREIYMDIINERR.K                                              |
| <a href="#">7506</a> | 885.6076 | 1769.2007 | 1769.8552 | -0.6545 | 2    | (3)   | 82      | 10   | R.MREIYMDIINERR.K                                              |
| <a href="#">8383</a> | 619.0132 | 1854.0177 | 1852.0094 | 2.0083  | 0    | 44    | 0.0055  | 1    | K.FGLTQAALSHVPLIEK.E                                           |
| <a href="#">8388</a> | 619.1629 | 1854.4667 | 1852.9241 | 1.5427  | 0    | 4     | 58      | 4    | R.VEITDAMAEITIFTAGR.A                                          |
| <a href="#">8418</a> | 929.4246 | 1856.8347 | 1855.9807 | 0.8540  | 0    | (69)  | 1.7e-05 | 1    | R.GFTPINFMLPWAPLPR.N <a href="#">8406</a> <a href="#">8428</a> |

|                       |                  |                  |                  |               |          |           |                |          |                                                            |
|-----------------------|------------------|------------------|------------------|---------------|----------|-----------|----------------|----------|------------------------------------------------------------|
| <a href="#">8549</a>  | <b>937.4641</b>  | <b>1872.9137</b> | <b>1871.9756</b> | <b>0.9381</b> | <b>0</b> | <b>72</b> | <b>8.2e-06</b> | <b>1</b> | <b>R.GFTPINFMLPWAPLPR.N</b>                                |
| <a href="#">9978</a>  | <b>1019.4761</b> | <b>2036.9377</b> | <b>2036.0699</b> | <b>0.8678</b> | <b>1</b> | <b>2</b>  | <b>85</b>      | <b>3</b> | <b>K.FAYVNLGVIVATMARHMK.L</b>                              |
| <a href="#">10367</a> | <b>694.2195</b>  | <b>2079.6367</b> | <b>2078.0241</b> | <b>1.6126</b> | <b>0</b> | <b>20</b> | <b>1.4</b>     | <b>1</b> | <b>R.LASEPAVMEELYQEIQITK.L</b>                             |
| <a href="#">11396</a> | <b>740.7102</b>  | <b>2219.1087</b> | <b>2219.0575</b> | <b>0.0512</b> | <b>2</b> | <b>4</b>  | <b>47</b>      | <b>3</b> | <b>R.DAAHARMREIYMDIINER.R</b>                              |
| <a href="#">11456</a> | <b>743.8942</b>  | <b>2228.6607</b> | <b>2227.1493</b> | <b>1.5114</b> | <b>1</b> | <b>1</b>  | <b>1e+02</b>   | <b>4</b> | <b>R.CIGEKFAYVNLGVIVATMAR.H <a href="#">11455</a></b>      |
| <a href="#">11503</a> | 1119.1916        | 2236.3687        | 2235.0524        | 1.3163        | 2        | (2)       | 77             | 7        | R.DAAHARMREIYMDIINER.R                                     |
| <a href="#">11575</a> | 750.4735         | 2248.3987        | 2247.2991        | 1.0997        | 2        | 7         | 27             | 8        | R.KITVYLGIQGNFILNGKLD                                      |
| <a href="#">11630</a> | <b>753.3509</b>  | <b>2257.0307</b> | <b>2254.2197</b> | <b>2.8110</b> | <b>2</b> | <b>4</b>  | <b>48</b>      | <b>6</b> | <b>R.GFTPINFMLPWAPLPRNRK.R <a href="#">11623</a></b>       |
| <a href="#">12022</a> | 771.1362         | 2310.3867        | 2311.1478        | -0.7611       | 1        | 1         | 1e+02          | 4        | K.GTSGRVEITDAMAEITIFTAGR.A                                 |
| <a href="#">12679</a> | <b>804.9729</b>  | <b>2411.8967</b> | <b>2410.0504</b> | <b>1.8463</b> | <b>1</b> | <b>5</b>  | <b>39</b>      | <b>3</b> | <b>K.NPDRETSDMIWNLMHCTYK.N <a href="#">12660</a></b>       |
| <a href="#">13517</a> | 841.6595         | 2521.9567        | 2520.3093        | 1.6474        | 2        | 1         | 85             | 9        | R.HRCIGEKFAYVNLGVIVATMAR.H                                 |
| <a href="#">15032</a> | <b>943.2272</b>  | <b>2826.6597</b> | <b>2825.4721</b> | <b>1.1877</b> | <b>2</b> | <b>9</b>  | <b>14</b>      | <b>2</b> | <b>K.FAYVNLGVIVATMARHMKLFNVGDK.K <a href="#">15034</a></b> |
| <a href="#">15147</a> | 952.0922         | 2853.2547        | 2852.4279        | 0.8268        | 2        | 1         | 87             | 2        | K.KGVPATDYSSMFGSPKPAIIGWERR.F                              |
| <a href="#">15660</a> | <b>1026.8582</b> | <b>3077.5527</b> | <b>3077.4806</b> | <b>0.0721</b> | <b>0</b> | <b>8</b>  | <b>18</b>      | <b>1</b> | <b>K.EIAHMMITLLMAGQHSSSSISSWIMLR.L</b>                     |

133. [gi|414296|gb|AAA32699.1|](#) Mass: 46710 Score: 186 Queries matched: 14 emPAI: 0.31

O-methyltransferase [Aspergillus flavus]

| Query                 | Observed        | Mr(expt)         | Mr(calc)         | Delta         | Miss     | Score     | Expect         | Rank     | Peptide                                              |
|-----------------------|-----------------|------------------|------------------|---------------|----------|-----------|----------------|----------|------------------------------------------------------|
| <a href="#">3710</a>  | 708.6931        | 1415.3717        | 1414.6729        | 0.6989        | 0        | 82        | 9.5e-07        | 1        | R.SGASFSDFLQQTG.G <a href="#">3713</a>               |
| <a href="#">5076</a>  | <b>783.5086</b> | <b>1565.0027</b> | <b>1562.7253</b> | <b>2.2774</b> | <b>0</b> | <b>7</b>  | <b>28</b>      | <b>1</b> | <b>K.GLFDYYSTVDEV.R.G</b>                            |
| <a href="#">6072</a>  | 824.6816        | 1647.3487        | 1645.7947        | 1.5540        | 1        | 0         | 1.5e+02        | 3        | R.YLATAGETKSPEDHK.L                                  |
| <a href="#">7885</a>  | 901.8376        | 1801.6607        | 1801.8958        | -0.2351       | 2        | 4         | 53             | 5        | K.RYLATAGETKSPEDHK.L                                 |
| <a href="#">10289</a> | <b>690.5172</b> | <b>2068.5297</b> | <b>2066.9585</b> | <b>1.5712</b> | <b>0</b> | <b>41</b> | <b>0.011</b>   | <b>1</b> | <b>R.FIFEEVAPDQYAHTDASK.M <a href="#">10286</a></b>  |
| <a href="#">10520</a> | 1051.0501       | 2100.0857        | 2100.0595        | 0.0262        | 0        | 36        | 0.032          | 1        | R.ILLDEMIMPDLAQSQR.F                                 |
| <a href="#">10814</a> | 715.2352        | 2142.6837        | 2140.0657        | 2.6181        | 1        | 2         | 79             | 1        | R.FMNQIDMTVVLTTLNGKER.S                              |
| <a href="#">10974</a> | 722.3702        | 2164.0887        | 2165.2532        | -1.1644       | 2        | 3         | 60             | 4        | M.ALPSKAALVGLANTLSEQVQR.Y <a href="#">10983</a>      |
| <a href="#">11043</a> | <b>725.0985</b> | <b>2172.2737</b> | <b>2171.1051</b> | <b>1.1686</b> | <b>0</b> | <b>51</b> | <b>0.00098</b> | <b>1</b> | <b>K.GKPPSWNVSPFSLAFDPTK.G <a href="#">11051</a></b> |
| <a href="#">12437</a> | 792.6655        | 2374.9747        | 2375.1824        | -0.2077       | 1        | 2         | 79             | 6        | K.SRILLDEMIMPDLAQSQR.F                               |

Proteins matching the same set of peptides:

[gi|456284|gb|AAA32697.1|](#) Mass: 46710 Score: 186 Queries matched: 14

O-methyltransferase [Aspergillus parasiticus]

[gi|2498702|sp|Q12120.1|OMTA\\_ASPPA](#) Mass: 46710 Score: 186 Queries matched: 14

RecName: Full=Sterigmatocystin 8-O-methyltransferase; Flags: Precursor

[gi|45477394|gb|AAS66017.1|](#) Mass: 46710 Score: 186 Queries matched: 14

methyltransferase A [Aspergillus parasiticus]

134. [gi|220695029|gb|EED51372.1|](#) Mass: 62126 Score: 184 Queries matched: 15 emPAI: 0.17

2-methylcitrate dehydratase, putative [Aspergillus flavus NRRL3357]

| Query                 | Observed        | Mr(expt)         | Mr(calc)         | Delta         | Miss     | Score      | Expect       | Rank     | Peptide                                          |
|-----------------------|-----------------|------------------|------------------|---------------|----------|------------|--------------|----------|--------------------------------------------------|
| <a href="#">20</a>    | 648.5020        | 647.4947         | 647.3602         | 0.1345        | 0        | 12         | 14           | 8        | R.ISSVSR.I                                       |
| <a href="#">1237</a>  | 539.5736        | 1077.1327        | 1077.6546        | -0.5219       | 0        | 15         | 5.8          | 3        | K.VGLDHSVVLVK.V <a href="#">1236</a>             |
| <a href="#">1345</a>  | 1096.8880       | 1095.8807        | 1095.5084        | 0.3723        | 0        | 6          | 38           | 5        | K.SALEGYDVK.Y                                    |
| <a href="#">1688</a>  | 579.5506        | 1157.0867        | 1156.6313        | 0.4555        | 1        | 6          | 44           | 6        | R.AVNSTAPRVSR.F                                  |
| <a href="#">2109</a>  | <b>619.5846</b> | <b>1237.1547</b> | <b>1235.6159</b> | <b>1.5388</b> | <b>0</b> | <b>32</b>  | <b>0.1</b>   | <b>1</b> | <b>R.HLQAHFEQAR.I</b>                            |
| <a href="#">5567</a>  | 805.3651        | 1608.7157        | 1606.8539        | 1.8618        | 2        | 1          | 1.1e+02      | 7        | R.SPRTFQSRISSVSR.I                               |
| <a href="#">6086</a>  | <b>825.2481</b> | <b>1648.4817</b> | <b>1647.8906</b> | <b>0.5911</b> | <b>0</b> | <b>116</b> | <b>4e-10</b> | <b>1</b> | <b>R.LVFLDTLGCGLLEALK.F <a href="#">6089</a></b> |
| <a href="#">8256</a>  | 615.1499        | 1842.4277        | 1840.9214        | 1.5064        | 2        | 8          | 25           | 5        | K.DIKEVTNRTHEACIR.I                              |
| <a href="#">11057</a> | 725.7745        | 2174.3017        | 2174.9698        | -0.6681       | 2        | 7          | 27           | 1        | R.HSPNTMSRKSWAAGDACQR.A                          |
| <a href="#">12562</a> | <b>798.4762</b> | <b>2392.4067</b> | <b>2391.2263</b> | <b>1.1804</b> | <b>0</b> | <b>29</b>  | <b>0.17</b>  | <b>1</b> | <b>K.GEGGLHTVLSAPVWGFYDVLFK.G</b>                |
| <a href="#">13804</a> | 855.1205        | 2562.3397        | 2564.2904        | -1.9507       | 1        | 0          | 1.1e+02      | 4        | K.MLGLSEKQTADAISQAFVDGQSLR.T                     |
| <a href="#">14549</a> | 900.3315        | 2697.9727        | 2698.3999        | -0.4272       | 1        | 4          | 47           | 10       | K.EVLEAMIKAHEIQVLALENSYNK.V                      |
| <a href="#">16302</a> | 1142.1169       | 3423.3287        | 3420.7923        | 2.5365        | 2        | 1          | 71           | 10       | K.VATTAVVAKMLGLSEKQTADAISQAFVDGQSLR.T            |

135. [gi|220699808|gb|EED56147.1|](#) Mass: 43546 Score: 181 Queries matched: 19 emPAI: 0.55

NADH-ubiquinone oxidoreductase 39 kDa subunit, putative [Aspergillus flavus NRRL3357]

| Query                 | Observed         | Mr(expt)         | Mr(calc)         | Delta          | Miss     | Score      | Expect         | Rank     | Peptide                                                   |
|-----------------------|------------------|------------------|------------------|----------------|----------|------------|----------------|----------|-----------------------------------------------------------|
| <a href="#">270</a>   | 818.4940         | 817.4867         | 817.3930         | 0.0938         | 1        | 10         | 20             | 4        | R.ERQEEK.K                                                |
| <a href="#">1524</a>  | <b>565.1146</b>  | <b>1128.2147</b> | <b>1127.5135</b> | <b>0.7012</b>  | <b>0</b> | <b>38</b>  | <b>0.031</b>   | <b>1</b> | <b>R.DSPSEFFATK.A <a href="#">1521</a></b>                |
| <a href="#">1733</a>  | <b>1167.7650</b> | <b>1166.7577</b> | <b>1167.5924</b> | <b>-0.8347</b> | <b>0</b> | <b>8</b>   | <b>22</b>      | <b>1</b> | <b>R.VNFLEYDLR.N <a href="#">1739</a></b>                 |
| <a href="#">2417</a>  | 637.7371         | 1273.4597        | 1271.6622        | 1.7975         | 0        | 43         | 0.0093         | 1        | R.HSDIVYNLVGR.Q                                           |
| <a href="#">4409</a>  | <b>748.6326</b>  | <b>1495.2507</b> | <b>1494.7202</b> | <b>0.5306</b>  | <b>0</b> | <b>64</b>  | <b>6e-05</b>   | <b>1</b> | <b>K.EYSTAEIAELVDR.E <a href="#">4423</a></b>             |
| <a href="#">5965</a>  | <b>820.9701</b>  | <b>1639.9257</b> | <b>1638.7274</b> | <b>1.1983</b>  | <b>0</b> | <b>58</b>  | <b>0.00024</b> | <b>1</b> | <b>K.NFSYTDVHVDGTER.I</b>                                 |
| <a href="#">7071</a>  | 863.2341         | 1724.4537        | 1722.8478        | 1.6059         | 0        | 10         | 15             | 2        | R.YWPVHAPDVGNALER.M <a href="#">7036</a>                  |
| <a href="#">7335</a>  | <b>877.3016</b>  | <b>1752.5887</b> | <b>1751.9246</b> | <b>0.6641</b>  | <b>0</b> | <b>48</b>  | <b>0.0022</b>  | <b>1</b> | <b>K.LLWWPIISPDEVER.E <a href="#">7340</a></b>            |
| <a href="#">7485</a>  | 884.7786         | 1767.5427        | 1766.0414        | 1.5013         | 1        | 1          | 1.3e+02        | 9        | R.NLQDVAITRTGKPIPK.V                                      |
| <a href="#">8210</a>  | 613.0085         | 1836.0037        | 1834.9326        | 1.0711         | 0        | 3          | 75             | 4        | R.SSLGGHTATVFGATGFLGR.Y                                   |
| <a href="#">10395</a> | 695.0005         | 2081.9797        | 2083.0078        | -1.0281        | 1        | 6          | 37             | 2        | R.LASQGCTVVVPYREEMTK.R                                    |
| <a href="#">14889</a> | <b>926.6642</b>  | <b>2776.9707</b> | <b>2774.4102</b> | <b>2.5606</b>  | <b>0</b> | <b>31</b>  | <b>0.079</b>   | <b>1</b> | <b>R.SIYPETTIVRPAPMFGFEDNLLHK.L <a href="#">14883</a></b> |
| <a href="#">14951</a> | <b>930.7325</b>  | <b>2789.1757</b> | <b>2790.4051</b> | <b>-1.2294</b> | <b>0</b> | <b>(0)</b> | <b>1e+02</b>   | <b>1</b> | <b>R.SIYPETTIVRPAPMFGFEDNLLHK.L</b>                       |

136. [gi|1293655|gb|AAC49318.1|](#) Mass: 70341 Score: 179 Queries matched: 29 emPAI: 0.31

versicolorin B synthase [Aspergillus parasiticus]

| Query                | Observed        | Mr(expt)         | Mr(calc)         | Delta          | Miss     | Score     | Expect      | Rank     | Peptide                |
|----------------------|-----------------|------------------|------------------|----------------|----------|-----------|-------------|----------|------------------------|
| <a href="#">314</a>  | 421.0041        | 839.9937         | 840.5545         | -0.5608        | 1        | 7         | 28          | 9        | R.VLGVKGLR.I           |
| <a href="#">913</a>  | <b>503.6206</b> | <b>1005.2267</b> | <b>1005.4880</b> | <b>-0.2612</b> | <b>0</b> | <b>30</b> | <b>0.18</b> | <b>1</b> | <b>R.VLFDDQNR.A</b>    |
| <a href="#">1025</a> | 518.9821        | 1035.9497        | 1034.5066        | 1.4431         | 0        | 4         | 64          | 6        | R.EIVASDVMR.E          |
| <a href="#">1191</a> | 535.2076        | 1068.4007        | 1067.6927        | 0.7080         | 2        | 10        | 16          | 6        | K.ARVLGVKGLR.I         |
| <a href="#">2160</a> | <b>623.2131</b> | <b>1244.4117</b> | <b>1244.5819</b> | <b>-0.1702</b> | <b>0</b> | <b>3</b>  | <b>79</b>   | <b>1</b> | <b>K.VESHSQLMGNK.E</b> |

|                       |                 |                  |                  |               |          |           |            |          |                                 |                                           |
|-----------------------|-----------------|------------------|------------------|---------------|----------|-----------|------------|----------|---------------------------------|-------------------------------------------|
| <a href="#">2438</a>  | 639.1011        | 1276.1877        | 1275.6935        | 0.4942        | 0        | 50        | 0.0016     | 1        | K.DHLEQLGIPVR.S                 | <a href="#">2455</a>                      |
| <a href="#">2750</a>  | 656.0041        | 1309.9937        | 1308.6245        | 1.3693        | 1        | 12        | 9.7        | 1        | R.DQEMAVAAFRR.C                 |                                           |
| <a href="#">2873</a>  | 663.8056        | 1325.5967        | 1325.7377        | -0.1410       | 0        | (11)      | 14         | 5        | R.SPQLLMVSGIGPK.D               |                                           |
| <a href="#">3013</a>  | 670.7451        | 1339.4757        | 1340.8140        | -1.3383       | 2        | 2         | 95         | 8        | K.AVVDSKARVLGVK.G               |                                           |
| <a href="#">3044</a>  | 672.1071        | 1342.1997        | 1341.7326        | 0.4671        | 0        | 40        | 0.017      | 1        | R.SPQLLMVSGIGPK.D               | <a href="#">3056</a>                      |
| <a href="#">4163</a>  | 489.6049        | 1465.7927        | 1464.7361        | 1.0566        | 0        | 12        | 9.2        | 1        | R.SYITHYTINPYTR.R               |                                           |
| <a href="#">5589</a>  | 537.6929        | 1610.0567        | 1608.7613        | 1.2954        | 2        | 4         | 67         | 7        | R.DQEMAVAAFRRCR.E               |                                           |
| <a href="#">6130</a>  | 826.8116        | 1651.6087        | 1650.8035        | 0.8052        | 0        | 13        | 7.1        | 2        | R.EALMESNNLNIFTR.T              |                                           |
| <a href="#">6782</a>  | 850.7426        | 1699.4707        | 1698.8253        | 0.6454        | 0        | 79        | 2e-06      | 1        | K.GLLTNPGQDYFAFEK.H             | <a href="#">6778</a>                      |
| <a href="#">7064</a>  | 575.5309        | 1723.5707        | 1721.7905        | 1.7802        | 0        | 4         | 60         | 10       | K.NYFSMSAALMTPFSR.G             |                                           |
| <a href="#">7828</a>  | 898.6956        | 1795.3767        | 1793.8519        | 1.5248        | 0        | 18        | 2.2        | 1        | K.MGFPEAQGFSGNLLGR.S            | <a href="#">7816</a> <a href="#">7836</a> |
| <a href="#">7955</a>  | 603.8105        | 1808.4097        | 1809.8468        | -1.4371       | 0        | (5)       | 45         | 4        | K.MGFPEAQGFSGNLLGR.S            |                                           |
| <a href="#">13543</a> | <b>841.9519</b> | <b>2522.8337</b> | <b>2521.2754</b> | <b>1.5583</b> | <b>1</b> | <b>28</b> | <b>0.2</b> | <b>1</b> | <b>K.VKNPLFDWYQYTPQPGLAQR.E</b> | <a href="#">13551</a>                     |
| <a href="#">14217</a> | 883.4865        | 2647.4377        | 2645.2755        | 2.1623        | 1        | 2         | 70         | 1        | R.ETASSSYLREALMESNNLNIFTR.T     |                                           |
| <a href="#">14249</a> | 885.4762        | 2653.4067        | 2652.3509        | 1.0558        | 0        | 24        | 0.49       | 1        | R.IVDASIFPFAIDGQPMGTVYALAEK.I   | <a href="#">14246</a>                     |
| <a href="#">14347</a> | 889.8975        | 2666.6707        | 2668.3458        | -1.6751       | 0        | (6)       | 28         | 3        | R.IVDASIFPFAIDGQPMGTVYALAEK.I   | <a href="#">14363</a>                     |

## Proteins matching the same set of peptides:

[gi|1293657|gb|AAC49319.1|](#) Mass: 70341 Score: 179 Queries matched: 29

versicolorin B synthase [Aspergillus parasiticus]

[gi|45477389|gb|AAS66012.1|](#) Mass: 70341 Score: 179 Queries matched: 29

versicolorin B synthase [Aspergillus parasiticus]

137. [gi|220701430|gb|EED57768.1|](#) Mass: 71526 Score: 179 Queries matched: 23 emPAI: 0.09

2-isopropylmalate synthase [Aspergillus flavus NRRL3357]

| Query                 | Observed         | Mr(expt)         | Mr(calc)         | Delta          | Miss     | Score     | Expect         | Rank     | Peptide                                                                                            |
|-----------------------|------------------|------------------|------------------|----------------|----------|-----------|----------------|----------|----------------------------------------------------------------------------------------------------|
| <a href="#">1610</a>  | 1139.8910        | 1138.8837        | 1137.5852        | 1.2985         | 1        | 0         | 1.4e+02        | 10       | R.IVFNMDKQK.S                                                                                      |
| <a href="#">2447</a>  | <b>639.2606</b>  | <b>1276.5067</b> | <b>1277.6914</b> | <b>-1.1847</b> | <b>2</b> | <b>13</b> | <b>9.1</b>     | <b>3</b> | <b>R.RIVFNMDKQK.S</b> <a href="#">2440</a>                                                         |
| <a href="#">2671</a>  | 651.6116         | 1301.2087        | 1301.7303        | -0.5216        | 2        | 2         | 1e+02          | 10       | K.IVQKKSEEVSR.E                                                                                    |
| <a href="#">4576</a>  | 759.3236         | 1516.6327        | 1516.8977        | -0.2650        | 2        | 2         | 90             | 4        | R.ALQVEFSKIVQKK.S <a href="#">4571</a>                                                             |
| <a href="#">5864</a>  | 816.6971         | 1631.3797        | 1629.6941        | 1.6857         | 0        | 7         | 32             | 9        | R.DGNQSLPDPMDGEQK.F                                                                                |
| <a href="#">5987</a>  | 548.4649         | 1642.3727        | 1641.8951        | 0.4776         | 1        | 7         | 27             | 2        | R.VNSQSGKGAAWILR.S                                                                                 |
| <a href="#">6509</a>  | 561.0272         | 1680.0597        | 1678.8905        | 1.1692         | 2        | 1         | 1.1e+02        | 9        | K.FRFFKMLVDIGYK.E                                                                                  |
| <a href="#">6871</a>  | <b>853.6666</b>  | <b>1705.3187</b> | <b>1703.8083</b> | <b>1.5104</b>  | <b>0</b> | <b>43</b> | <b>0.0077</b>  | <b>1</b> | <b>R.GCAIAAAELAQMAGAQR.V</b>                                                                       |
| <a href="#">8494</a>  | <b>623.1882</b>  | <b>1866.5427</b> | <b>1865.0523</b> | <b>1.4904</b>  | <b>1</b> | <b>2</b>  | <b>83</b>      | <b>1</b> | <b>K.GGAAWILRSLELDLPR.A</b>                                                                        |
| <a href="#">9040</a>  | 963.2351         | 1924.4557        | 1923.9910        | 0.4647         | 2        | 2         | 84             | 9        | R.IVFNMDKQKSLEMAVR.C                                                                               |
| <a href="#">9125</a>  | 646.2249         | 1935.6527        | 1932.8636        | 2.7891         | 1        | 1         | 97             | 3        | R.DGNQSLPDPMDGEQKFR.F <a href="#">9108</a>                                                         |
| <a href="#">11548</a> | 748.6749         | 2243.0027        | 2244.2531        | -1.2504        | 2        | 1         | 96             | 5        | R.FKPLHLPDRQWPKNVIEK.A <a href="#">11549</a>                                                       |
| <a href="#">12460</a> | <b>1190.4281</b> | <b>2378.8417</b> | <b>2378.2305</b> | <b>0.6113</b>  | <b>0</b> | <b>91</b> | <b>8.6e-08</b> | <b>1</b> | <b>R.LVETPGVVPDDVWLQVLSPCR.E</b> <a href="#">12462</a> <a href="#">12463</a> <a href="#">12465</a> |
| <a href="#">13343</a> | 834.3119         | 2499.9137        | 2501.1493        | -1.2355        | 1        | 0         | 1.1e+02        | 4        | R.WLATDLRDGNQSLPDPMDGEQK.F                                                                         |

[13833](#) **856.9165** **2567.7277** **2565.4027** **2.3250** **2** **5** **39** **1** **R.VNSQSGKGGAAWVILRSLELDLPR.A**  
[16004](#) **1089.2619** **3264.7637** **3262.6087** **2.1550** **2** **3** **53** **2** **R.EKYVVSIIHPHNDRGCAIAAAELAQMAGAQR.V**

138. [gi|220695168|gb|EED51511.1|](#) **Mass:** 53246 **Score:** 176 **Queries matched:** 18 **emPAI:** 0.27

aldehyde dehydrogenase, putative [Aspergillus flavus NRRL3357]

| Query                 | Observed         | Mr(expt)         | Mr(calc)         | Delta         | Miss     | Score     | Expect         | Rank     | Peptide                                                |
|-----------------------|------------------|------------------|------------------|---------------|----------|-----------|----------------|----------|--------------------------------------------------------|
| <a href="#">902</a>   | 502.0561         | 1002.0977        | 1002.5458        | -0.4481       | 0        | 15        | 6              | 2        | M.ASITVTGAAGR.Q                                        |
| <a href="#">2541</a>  | <b>644.1981</b>  | <b>1286.3817</b> | <b>1284.6608</b> | <b>1.7209</b> | <b>0</b> | <b>41</b> | <b>0.013</b>   | <b>1</b> | <b>K.GMNIPQAVGNLR.Y</b> <a href="#">2530</a>           |
| <a href="#">3305</a>  | <b>1369.3660</b> | <b>1368.3587</b> | <b>1367.8248</b> | <b>0.5339</b> | <b>2</b> | <b>8</b>  | <b>24</b>      | <b>3</b> | <b>K.NTSGPARAKLLK.L</b>                                |
| <a href="#">4414</a>  | 748.7571         | 1495.4997        | 1494.9497        | 0.5500        | 2        | 5         | 49             | 2        | R.AKLLKLDLIER.D                                        |
| <a href="#">4947</a>  | <b>776.3946</b>  | <b>1550.7747</b> | <b>1550.6923</b> | <b>0.0825</b> | <b>0</b> | <b>16</b> | <b>4</b>       | <b>1</b> | <b>R.DMGEEALEGWTSVK.S</b> <a href="#">4944</a>         |
| <a href="#">7553</a>  | 887.2426         | 1772.4707        | 1770.9952        | 1.4756        | 2        | 10        | 16             | 2        | K.TAASNLRVNLLEGGK.G <a href="#">7544</a>               |
| <a href="#">11204</a> | <b>1097.3796</b> | <b>2192.7447</b> | <b>2192.0208</b> | <b>0.7239</b> | <b>0</b> | <b>73</b> | <b>6e-06</b>   | <b>1</b> | <b>K.GPSIVFDDCDLNAVLWTR.I</b> <a href="#">11217</a>    |
| <a href="#">11275</a> | <b>1102.2916</b> | <b>2202.5687</b> | <b>2201.0012</b> | <b>1.5675</b> | <b>0</b> | <b>10</b> | <b>13</b>      | <b>1</b> | <b>R.DADDFASLEAVDAGVLYTDSK.G</b>                       |
| <a href="#">12264</a> | <b>1174.2571</b> | <b>2346.4997</b> | <b>2346.1995</b> | <b>0.3003</b> | <b>0</b> | <b>57</b> | <b>0.00028</b> | <b>1</b> | <b>K.EEIFGPVASIAPFETAEVIAK.A</b> <a href="#">12262</a> |
| <a href="#">13054</a> | <b>1233.8146</b> | <b>2465.6147</b> | <b>2464.3011</b> | <b>1.3137</b> | <b>0</b> | <b>23</b> | <b>0.72</b>    | <b>1</b> | <b>R.EPLGVCGAIVPWNAPLMITIWK.L</b>                      |
| <a href="#">13831</a> | <b>856.8099</b>  | <b>2567.4077</b> | <b>2564.4577</b> | <b>2.9500</b> | <b>0</b> | <b>39</b> | <b>0.016</b>   | <b>1</b> | <b>K.LAPALAAGNSLIKPSSELSPLYAQK.L</b>                   |
| <a href="#">14221</a> | 883.7049         | 2648.0927        | 2647.3567        | 0.7360        | 2        | 2         | 76             | 10       | R.DMGEEALEGWTSVKSVKYAILPPK.L                           |
| <a href="#">15816</a> | 1053.4612        | 3157.3617        | 3158.5819        | -1.2202       | 2        | 1         | 80             | 3        | K.RVNLELGGKGPSIVFDDCDLNAVLWTR.I                        |

139. [gi|220688456|gb|EED44809.1|](#) **Mass:** 25719 **Score:** 176 **Queries matched:** 26 **emPAI:** 1.08

60S ribosomal protein L13 [Aspergillus flavus NRRL3357]

| Query                | Observed         | Mr(expt)         | Mr(calc)         | Delta         | Miss     | Score     | Expect      | Rank     | Peptide                                                                          |
|----------------------|------------------|------------------|------------------|---------------|----------|-----------|-------------|----------|----------------------------------------------------------------------------------|
| <a href="#">285</a>  | <b>827.5390</b>  | <b>826.5317</b>  | <b>826.4912</b>  | <b>0.0405</b> | <b>0</b> | <b>30</b> | <b>0.16</b> | <b>1</b> | <b>R.ANATLPIK.N</b> <a href="#">286</a> <a href="#">289</a>                      |
| <a href="#">442</a>  | 440.0271         | 878.0397         | 877.4909         | 0.5488        | 0        | 50        | 0.0019      | 1        | R.GFTLAELEK.E <a href="#">439</a> <a href="#">441</a> <a href="#">443</a>        |
| <a href="#">901</a>  | <b>501.8581</b>  | <b>1001.7017</b> | <b>1001.5142</b> | <b>0.1876</b> | <b>0</b> | <b>27</b> | <b>0.43</b> | <b>1</b> | <b>K.ESLVANVDR.L</b> <a href="#">896</a> <a href="#">898</a> <a href="#">899</a> |
| <a href="#">1038</a> | 520.3916         | 1038.7687        | 1036.5124        | 2.2563        | 1        | 4         | 59          | 6        | R.CPTVKYNR.R                                                                     |
| <a href="#">1929</a> | <b>1208.0730</b> | <b>1207.0657</b> | <b>1205.5775</b> | <b>1.4882</b> | <b>0</b> | <b>21</b> | <b>1.3</b>  | <b>1</b> | <b>K.LDSSAEVSAK.A</b>                                                            |
| <a href="#">2008</a> | 611.1711         | 1220.3277        | 1219.6421        | 0.6856        | 2        | 6         | 47          | 9        | K.GEEAAYRRLR.E                                                                   |
| <a href="#">2969</a> | 668.2046         | 1334.3947        | 1333.6725        | 0.7222        | 1        | 100       | 1.5e-08     | 1        | K.KLDSSAEVSAK.A <a href="#">2962</a>                                             |
| <a href="#">3442</a> | <b>461.6342</b>  | <b>1381.8807</b> | <b>1379.7885</b> | <b>2.0922</b> | <b>1</b> | <b>25</b> | <b>0.44</b> | <b>1</b> | <b>K.KLASTIGIAVDHR.R</b> <a href="#">3439</a>                                    |
| <a href="#">3660</a> | 470.2682         | 1407.7827        | 1407.7946        | -0.0119       | 1        | 4         | 63          | 6        | K.LASTIGIAVDHRR.V                                                                |
| <a href="#">3752</a> | 474.5429         | 1420.6067        | 1419.7120        | 0.8948        | 0        | 49        | 0.002       | 1        | K.HNNQILNQHFR.K <a href="#">3751</a>                                             |
| <a href="#">4237</a> | <b>492.6309</b>  | <b>1474.8707</b> | <b>1472.8239</b> | <b>2.0469</b> | <b>1</b> | <b>3</b>  | <b>73</b>   | <b>4</b> | <b>R.GFTLAELEKEAGIPK.K</b>                                                       |
| <a href="#">6129</a> | 826.8066         | 1651.5987        | 1648.8784        | 2.7203        | 2        | 0         | 1.3e+02     | 7        | K.ESLVANVDRLLKDYK.A                                                              |
| <a href="#">7375</a> | 879.7861         | 1757.5577        | 1756.9883        | 0.5695        | 2        | 4         | 62          | 4        | K.LRPVVRCPYKYNR.R                                                                |
| <a href="#">8033</a> | <b>606.3662</b>  | <b>1816.0767</b> | <b>1814.1002</b> | <b>1.9765</b> | <b>1</b> | <b>5</b>  | <b>45</b>   | <b>5</b> | <b>K.AAAVAPRPVDKLRPVVR.C</b>                                                     |
| <a href="#">9426</a> | 659.2422         | 1974.7047        | 1975.1214        | -0.4167       | 2        | 2         | 88          | 9        | K.EAGIPKLASTIGIAVDHR.R                                                           |

140. [gi|220693734|gb|EED50079.1|](#) Mass: 42627 Score: 176 Queries matched: 11 emPAI: 0.35

S-adenosylmethionine synthetase [Aspergillus flavus NRRL3357]

| Query                 | Observed  | Mr(expt)  | Mr(calc)  | Delta   | Miss | Score | Expect  | Rank | Peptide                                             |
|-----------------------|-----------|-----------|-----------|---------|------|-------|---------|------|-----------------------------------------------------|
| <a href="#">1701</a>  | 580.7771  | 1159.5397 | 1158.6244 | 0.9153  | 0    | 13    | 9.3     | 5    | K.SSEELVQIVR.N                                      |
| <a href="#">2370</a>  | 635.0111  | 1268.0077 | 1267.6772 | 0.3305  | 0    | 31    | 0.14    | 1    | K.QVIPAEELLDDR.T <a href="#">2368</a>               |
| <a href="#">3970</a>  | 723.2241  | 1444.4337 | 1443.7471 | 0.6867  | 0    | 74    | 5.6e-06 | 1    | R.FVIGGPQGDAGLTGR.K                                 |
| <a href="#">5155</a>  | 787.2581  | 1572.5017 | 1571.8420 | 0.6597  | 1    | 1     | 1.2e+02 | 10   | R.FVIGGPQGDAGLTGRK.I                                |
| <a href="#">12901</a> | 814.5199  | 2440.5377 | 2442.1604 | -1.6227 | 1    | 3     | 55      | 1    | K.IIVDTYGGWGAHGGGAFSGKDYSK.V                        |
| <a href="#">13860</a> | 858.6879  | 2573.0417 | 2570.2554 | 2.7863  | 2    | 7     | 27      | 2    | R.KIIVDTYGGWGAHGGGAFSGKDYSK.V <a href="#">13855</a> |
| <a href="#">15011</a> | 938.8859  | 2813.6357 | 2812.3569 | 1.2788  | 2    | 1     | 82      | 6    | K.IIVDTYGGWGAHGGGAFSGKDYSKVDR.S                     |
| <a href="#">15539</a> | 1014.5835 | 3040.7287 | 3040.4811 | 0.2476  | 0    | 48    | 0.0015  | 1    | K.TCNVLVAIEQQSPDIAQGLHYDEALEK.L                     |
| <a href="#">15860</a> | 1063.3369 | 3186.9887 | 3185.6319 | 1.3569  | 0    | 92    | 5.7e-08 | 1    | K.LGAGDQGIMFGYATDETPELLPLTVILSHK.L                  |

141. [gi|220688462|gb|EED44815.1|](#) Mass: 53555 Score: 174 Queries matched: 22 emPAI: 0.20

succinyl-CoA synthetase beta subunit, putative [Aspergillus flavus NRRL3357]

| Query                 | Observed  | Mr(expt)  | Mr(calc)  | Delta   | Miss | Score | Expect  | Rank | Peptide                                            |
|-----------------------|-----------|-----------|-----------|---------|------|-------|---------|------|----------------------------------------------------|
| <a href="#">1418</a>  | 555.7696  | 1109.5247 | 1106.5278 | 2.9970  | 0    | 5     | 47      | 3    | K.SLGNDDMVIK.A                                     |
| <a href="#">1746</a>  | 585.6301  | 1169.2457 | 1168.5149 | 0.7308  | 0    | 68    | 2.5e-05 | 1    | K.LGFDDNADFR.Q <a href="#">1752</a>                |
| <a href="#">1932</a>  | 604.6996  | 1207.3847 | 1206.6132 | 0.7715  | 0    | 62    | 9.7e-05 | 1    | K.SAFELITSDPK.V <a href="#">1930</a>               |
| <a href="#">3381</a>  | 688.3971  | 1374.7797 | 1375.7460 | -0.9662 | 1    | 18    | 2.6     | 2    | K.GGVRVIYSPTPEAK.M <a href="#">3400</a>            |
| <a href="#">3410</a>  | 460.0165  | 1377.0277 | 1378.7755 | -1.7478 | 2    | 9     | 21      | 6    | K.SVQFSKVVKMAR.E                                   |
| <a href="#">4269</a>  | 739.6666  | 1477.3187 | 1476.7460 | 0.5727  | 0    | 89    | 1.8e-07 | 1    | K.IFSIEDLQNAAEK.S                                  |
| <a href="#">4330</a>  | 496.0949  | 1485.2627 | 1485.8528 | -0.5901 | 1    | 6     | 39      | 7    | R.SRPIAAAFRAATVR.F                                 |
| <a href="#">4810</a>  | 770.9481  | 1539.8817 | 1539.8396 | 0.0422  | 0    | 0     | 1.3e+02 | 3    | K.ETPEAIITPIDIK.V                                  |
| <a href="#">5533</a>  | 803.8431  | 1605.6717 | 1605.8371 | -0.1654 | 1    | 2     | 1e+02   | 9    | K.MFAGQMIGHKLITK.Q                                 |
| <a href="#">6220</a>  | 830.4321  | 1658.8497 | 1657.8749 | 0.9748  | 2    | 4     | 63      | 5    | K.DTIQKLYKVFMEK.D                                  |
| <a href="#">7798</a>  | 897.2271  | 1792.4397 | 1791.8713 | 0.5684  | 0    | 6     | 39      | 3    | K.IATELGFSEQCIPEAK.D                               |
| <a href="#">8462</a>  | 621.6522  | 1861.9347 | 1858.9571 | 2.9776  | 1    | 12    | 8.2     | 2    | K.SLGNDDVIKAQVLAGGR.G <a href="#">8451</a>         |
| <a href="#">9528</a>  | 995.3141  | 1988.6137 | 1987.9819 | 0.6318  | 0    | 1     | 98      | 2    | R.CDAIAQGLINVVNEMGLR.T                             |
| <a href="#">10060</a> | 1023.4541 | 2044.8937 | 2044.0735 | 0.8202  | 2    | 3     | 69      | 1    | K.SLGNDDVIKAQVLAGGRGK.G                            |
| <a href="#">10677</a> | 709.1625  | 2124.4657 | 2123.0544 | 1.4114  | 1    | 0     | 1.2e+02 | 6    | R.VIYSPTPEAKMFAGQMIGHK.L                           |
| <a href="#">12028</a> | 1156.3491 | 2310.6837 | 2310.0764 | 0.6073  | 2    | 0     | 1.2e+02 | 5    | R.QKEVFSWRDTTQEDADEVK.A                            |
| <a href="#">14119</a> | 876.7075  | 2627.1007 | 2625.3731 | 1.7277  | 1    | 3     | 58      | 2    | R.CDAIAQGLINVVNEMGLRTPIVAR.L <a href="#">14118</a> |

142. [gi|220697094|gb|EED53435.1|](#) Mass: 47231 Score: 174 Queries matched: 21 emPAI: 0.31

argininosuccinate synthase [Aspergillus flavus NRRL3357]

| Query               | Observed | Mr(expt) | Mr(calc) | Delta   | Miss | Score | Expect  | Rank | Peptide                          |
|---------------------|----------|----------|----------|---------|------|-------|---------|------|----------------------------------|
| <a href="#">370</a> | 857.8760 | 856.8687 | 857.4607 | -0.5919 | 0    | 9     | 23      | 5    | R.IDIVENR.F                      |
| <a href="#">627</a> | 468.7291 | 935.4437 | 936.5181 | -1.0744 | 2    | 1     | 1.3e+02 | 8    | R.DPKFFKR.F                      |
| <a href="#">774</a> | 977.6210 | 976.6137 | 976.6069 | 0.0068  | 2    | 8     | 29      | 7    | R.LKKYGLQK.A <a href="#">771</a> |



|                       |           |           |           |         |   |     |         |   |                                                                                   |
|-----------------------|-----------|-----------|-----------|---------|---|-----|---------|---|-----------------------------------------------------------------------------------|
| <a href="#">906</a>   | 502.4806  | 1002.9467 | 1002.5532 | 0.3935  | 1 | 11  | 15      | 7 | K.KMVIEDLR.R                                                                      |
| <a href="#">3471</a>  | 693.7151  | 1385.4157 | 1382.6322 | 2.7835  | 0 | (3) | 79      | 8 | R.GCYDSPAMTILR.A                                                                  |
| <a href="#">3595</a>  | 700.5941  | 1399.1737 | 1398.6272 | 0.5466  | 0 | 39  | 0.018   | 1 | R.GCYDSPAMTILR.A                                                                  |
| <a href="#">4690</a>  | 764.3006  | 1526.5867 | 1525.8180 | 0.7687  | 0 | 66  | 3.5e-05 | 1 | R.FELAFYAIQPSIK.I <a href="#">4681</a> <a href="#">4697</a>                       |
| <a href="#">5665</a>  | 808.7146  | 1615.4147 | 1613.7937 | 1.6210  | 0 | 46  | 0.0034  | 1 | K.TYTDSVELFNALNK.L <a href="#">5637</a> <a href="#">5641</a> <a href="#">5681</a> |
| <a href="#">6231</a>  | 830.8386  | 1659.6627 | 1658.9468 | 0.7160  | 2 | 4   | 64      | 5 | R.IDIVENRFIQLKSR.G                                                                |
| <a href="#">7713</a>  | 893.2786  | 1784.5427 | 1783.8597 | 0.6830  | 0 | 4   | 59      | 5 | R.VCLAYSGGLDTSCILR.W                                                              |
| <a href="#">12936</a> | 1223.5011 | 2444.9877 | 2444.1140 | 0.8737  | 0 | 56  | 0.00029 | 1 | R.EFVEELCFPAIQCNAIYEGR.Y                                                          |
| <a href="#">15934</a> | 1074.3055 | 3219.8947 | 3221.6721 | -1.7773 | 2 | 3   | 49      | 3 | K.LVTPEKTYTDSVELFNALNKLYTHGVGR.I <a href="#">15936</a>                            |
| <a href="#">16146</a> | 1110.7322 | 3329.1747 | 3328.6656 | 0.5091  | 2 | 0   | 83      | 9 | K.SRGCYDSPAMTILRAAHLDLLEGLVLDGQVR.S <a href="#">16147</a>                         |

143. [gi|220701357|gb|EED57695.1|](#) Mass: 46653 Score: 173 Queries matched: 8 empAI: 0.23

adenylosuccinate synthetase AdB [Aspergillus flavus NRRL3357]

| Query                 | Observed | Mr(expt)  | Mr(calc)  | Delta  | Miss | Score | Expect  | Rank | Peptide                                   |
|-----------------------|----------|-----------|-----------|--------|------|-------|---------|------|-------------------------------------------|
| <a href="#">106</a>   | 720.5980 | 719.5907  | 719.3272  | 0.2635 | 0    | 7     | 41      | 5    | R.DDMIAR.E                                |
| <a href="#">4711</a>  | 765.7236 | 1529.4327 | 1528.7620 | 0.6707 | 0    | 21    | 1.2     | 1    | R.TENTIPADAEVLEK.V                        |
| <a href="#">7005</a>  | 573.5045 | 1717.4917 | 1715.9053 | 1.5864 | 2    | 2     | 80      | 9    | K.ELASLEEKLEGASKR.I                       |
| <a href="#">7006</a>  | 859.8226 | 1717.6307 | 1716.9814 | 0.6493 | 0    | 72    | 8.3e-06 | 1    | K.LLGPYIVDQLAFLQK.Y <a href="#">7008</a>  |
| <a href="#">9089</a>  | 966.2781 | 1930.5417 | 1929.8996 | 0.6421 | 0    | 68    | 2e-05   | 1    | R.FGDLEYNVEEELAQFK.E <a href="#">9080</a> |
| <a href="#">14857</a> | 924.5392 | 2770.5957 | 2770.4389 | 0.1569 | 1    | 2     | 78      | 2    | K.VGVAYILPDGTRTENTIPADAEVLEK.V            |

144. [gi|220689982|gb|EED46332.1|](#) Mass: 52101 Score: 173 Queries matched: 32 empAI: 0.63

argininosuccinate lyase [Aspergillus flavus NRRL3357]

| Query                | Observed | Mr(expt)  | Mr(calc)  | Delta   | Miss | Score | Expect  | Rank | Peptide                                                      |
|----------------------|----------|-----------|-----------|---------|------|-------|---------|------|--------------------------------------------------------------|
| <a href="#">991</a>  | 515.6721 | 1029.3297 | 1029.5454 | -0.2157 | 0    | 28    | 0.27    | 1    | K.NADSLELLR.G                                                |
| <a href="#">2732</a> | 655.2951 | 1308.5757 | 1309.7215 | -1.1457 | 2    | 9     | 21      | 5    | K.EIGGKLHTGRSR.N                                             |
| <a href="#">3066</a> | 673.6541 | 1345.2937 | 1344.7435 | 0.5502  | 1    | 49    | 0.0023  | 1    | R.RLDSILCDLIK.V                                              |
| <a href="#">3599</a> | 700.6766 | 1399.3387 | 1398.8194 | 0.5193  | 2    | 12    | 9.8     | 4    | R.RLSEIIGKEIGGK.L                                            |
| <a href="#">3699</a> | 707.9586 | 1413.9027 | 1413.6818 | 0.2209  | 0    | 6     | 45      | 4    | R.AFGQMAGLMMTIK.G                                            |
| <a href="#">3822</a> | 715.7041 | 1429.3937 | 1429.6768 | -0.2830 | 0    | (3)   | 87      | 3    | R.AFGQMAGLMMTIK.G                                            |
| <a href="#">3827</a> | 715.9921 | 1429.9697 | 1429.6768 | 0.2930  | 0    | (4)   | 71      | 2    | R.AFGQMAGLMMTIK.G                                            |
| <a href="#">5217</a> | 790.7626 | 1579.5107 | 1576.8018 | 2.7089  | 0    | 2     | 96      | 1    | K.TSVPMDTSLLEQLK.T                                           |
| <a href="#">5482</a> | 534.8449 | 1601.5127 | 1599.7450 | 1.7677  | 0    | 8     | 26      | 1    | R.LSDAYSTGSSLMPQK.K <a href="#">5481</a>                     |
| <a href="#">6093</a> | 550.6912 | 1649.0517 | 1646.8199 | 2.2319  | 1    | 5     | 51      | 4    | R.NEQVATDMRLWLR.D                                            |
| <a href="#">6098</a> | 825.6691 | 1649.3237 | 1648.8672 | 0.4566  | 0    | 76    | 4.2e-06 | 1    | K.DLQESIEPLLDHIK.T <a href="#">6111</a> <a href="#">6114</a> |
| <a href="#">6108</a> | 826.1626 | 1650.3107 | 1649.8260 | 0.4847  | 0    | 45    | 0.0045  | 1    | K.TGILTQQEFSEIER.G <a href="#">6115</a>                      |
| <a href="#">6647</a> | 844.8351 | 1687.6557 | 1688.6988 | -1.0431 | 0    | 4     | 55      | 4    | R.FDEDVQTCLDYER.A                                            |
| <a href="#">8953</a> | 639.2185 | 1914.6337 | 1914.9478 | -0.3141 | 2    | 12    | 9.2     | 1    | R.GKAGRAFGQMAGLMMTIK.G <a href="#">8958</a>                  |
| <a href="#">9611</a> | 666.2489 | 1995.7247 | 1993.9455 | 1.7792  | 0    | 22    | 0.78    | 1    | R.AEAELDYLMPGYTHLQK.A                                        |

|                       |           |           |           |         |   |      |         |   |                                                                        |
|-----------------------|-----------|-----------|-----------|---------|---|------|---------|---|------------------------------------------------------------------------|
| <a href="#">10790</a> | 1071.1341 | 2140.2537 | 2139.0650 | 1.1887  | 0 | 71   | 9.4e-06 | 1 | R.WSHWILSHATAFASELQR.L                                                 |
| <a href="#">11232</a> | 1098.7676 | 2195.5207 | 2194.1013 | 1.4194  | 0 | (27) | 0.24    | 1 | K.MTAALAPEMLATEIADYLVR.K                                               |
| <a href="#">11234</a> | 732.8909  | 2195.6507 | 2194.1013 | 1.5494  | 0 | 36   | 0.033   | 1 | K.MTAALAPEMLATEIADYLVR.K                                               |
| <a href="#">11717</a> | 758.5542  | 2272.6407 | 2271.2574 | 1.3834  | 0 | 8    | 18      | 2 | K.TVSDSIQIATGVLSTLTVIPEK.M <a href="#">11710</a> <a href="#">11712</a> |
| <a href="#">11785</a> | 761.2769  | 2280.8087 | 2280.0377 | 0.7710  | 1 | 0    | 1.2e+02 | 9 | R.DFAMETMQWGSSFMLKISR.W                                                |
| <a href="#">12593</a> | 800.6205  | 2398.8397 | 2400.2478 | -1.4080 | 1 | 1    | 95      | 4 | K.ISRWAEDLIYSSLEFGFVR.L                                                |
| <a href="#">13560</a> | 842.7692  | 2525.2857 | 2523.3220 | 1.9637  | 1 | 2    | 74      | 8 | K.GLPTTYNKDLQESIEPLLDHIK.T                                             |
| <a href="#">13875</a> | 859.3862  | 2575.1367 | 2572.2964 | 2.8403  | 2 | 1    | 99      | 8 | K.AGRAFGQMAGLMMTIKGLPTTYNK.D                                           |
| <a href="#">13938</a> | 863.7809  | 2588.3207 | 2590.2043 | -1.8836 | 1 | 4    | 46      | 1 | R.ESMAKELGFEGLLYNSMNTVADR.D <a href="#">13939</a>                      |

145. [gi|220689851|gb|EED46201.1|](#) Mass: 40859 Score: 171 Queries matched: 6 emPAI: 0.17

isoflavone reductase family protein [Aspergillus flavus NRRL3357]

| Query                 | Observed  | Mr(expt)  | Mr(calc)  | Delta   | Miss | Score | Expect  | Rank | Peptide                                                                             |
|-----------------------|-----------|-----------|-----------|---------|------|-------|---------|------|-------------------------------------------------------------------------------------|
| <a href="#">9253</a>  | 977.1696  | 1952.3247 | 1951.9262 | 0.3985  | 0    | 85    | 4.3e-07 | 1    | K.TQNEIYDLLEEISEEK.I <a href="#">9257</a> <a href="#">9264</a> <a href="#">9265</a> |
| <a href="#">14321</a> | 888.1169  | 2661.3287 | 2661.3560 | -0.0273 | 2    | 2     | 72      | 2    | K.RFVPCGFITVAPPGGIMWLRDEK.E                                                         |
| <a href="#">16410</a> | 1165.8202 | 3494.4387 | 3491.7341 | 2.7046  | 0    | 62    | 4.8e-05 | 1    | K.GPEESLTEALEGIDVVISCVGPAEQDQIPLAK.A                                                |

146. [gi|220699072|gb|EED55411.1|](#) Mass: 27262 Score: 171 Queries matched: 20 emPAI: 0.26

40S ribosomal protein S6 [Aspergillus flavus NRRL3357]

| Query                 | Observed | Mr(expt)  | Mr(calc)  | Delta   | Miss | Score | Expect  | Rank | Peptide                                                                             |
|-----------------------|----------|-----------|-----------|---------|------|-------|---------|------|-------------------------------------------------------------------------------------|
| <a href="#">446</a>   | 881.4950 | 880.4877  | 880.3926  | 0.0951  | 0    | 7     | 25      | 6    | R.EAANDYAK.L                                                                        |
| <a href="#">1461</a>  | 560.0691 | 1118.1237 | 1118.6924 | -0.5687 | 2    | 7     | 38      | 8    | K.FVIRRTVTK.E                                                                       |
| <a href="#">3540</a>  | 697.5026 | 1392.9907 | 1394.6426 | -1.6518 | 1    | 3     | 73      | 8    | R.SEAAREAANDYAK.L                                                                   |
| <a href="#">3654</a>  | 704.5991 | 1407.1837 | 1407.6817 | -0.4979 | 1    | 3     | 68      | 4    | K.ITGGNDKQGFPMK.Q                                                                   |
| <a href="#">4970</a>  | 518.5642 | 1552.6707 | 1549.7922 | 2.8785  | 1    | 5     | 41      | 7    | -.MKLNISYPANGSQK.I <a href="#">4923</a> <a href="#">4929</a>                        |
| <a href="#">5003</a>  | 779.5871 | 1557.1597 | 1556.7882 | 0.3716  | 0    | 5     | 47      | 3    | R.LLLADGHSCYRPR.R                                                                   |
| <a href="#">5273</a>  | 792.6671 | 1583.3197 | 1582.7185 | 0.6012  | 0    | 59    | 0.0002  | 1    | R.MGTEVVGDSLDEFK.G                                                                  |
| <a href="#">5304</a>  | 529.7645 | 1586.2717 | 1586.8603 | -0.5886 | 1    | 4     | 65      | 10   | K.QGFPMKQGVLLPTR.T                                                                  |
| <a href="#">5959</a>  | 820.7676 | 1639.5207 | 1638.8465 | 0.6742  | 0    | 88    | 2.3e-07 | 1    | K.QGEGELPGLTDTVVPK.R <a href="#">5957</a> <a href="#">5976</a> <a href="#">5978</a> |
| <a href="#">7370</a>  | 586.6845 | 1757.0317 | 1754.8145 | 2.2172  | 1    | 14    | 5.9     | 1    | K.RMGTEVVGDSLDEFK.G                                                                 |
| <a href="#">7842</a>  | 599.8402 | 1796.4987 | 1794.9476 | 1.5511  | 1    | 7     | 25      | 5    | K.QGEGELPGLTDTVVPKR.L                                                               |
| <a href="#">8032</a>  | 606.3315 | 1815.9727 | 1813.9370 | 2.0358  | 1    | 4     | 62      | 2    | R.TRLLLADGHSCYRPR.R                                                                 |
| <a href="#">9342</a>  | 982.7571 | 1963.4997 | 1961.9918 | 1.5079  | 2    | 4     | 49      | 4    | R.SEAAREAANDYAKLLANR.V                                                              |
| <a href="#">10298</a> | 690.9605 | 2069.8597 | 2070.0493 | -0.1896 | 2    | 3     | 61      | 4    | R.EAANDYAKLLANRVHEEK.A <a href="#">10302</a>                                        |

147. [gi|220700172|gb|EED56511.1|](#) Mass: 28769 Score: 170 Queries matched: 7 emPAI: 0.25

proteasome component Prs3, putative [Aspergillus flavus NRRL3357]

| Query                | Observed | Mr(expt)  | Mr(calc)  | Delta   | Miss | Score | Expect | Rank | Peptide       |
|----------------------|----------|-----------|-----------|---------|------|-------|--------|------|---------------|
| <a href="#">1258</a> | 541.2386 | 1080.4627 | 1081.5842 | -1.1214 | 1    | 4     | 63     | 9    | R.LDAVVKMYK.Y |

[10470](#) [1047.8006](#) [2093.5867](#) [2093.0615](#) [0.5252](#) [0](#) [85](#) [4.1e-07](#) [1](#) [R.AAGSAASLIMPFLDNQVNFK.N](#) [10471](#) [10477](#) [10482](#)  
[15230](#) [963.0692](#) [2886.1857](#) [2884.2909](#) [1.8948](#) [0](#) [4](#) [42](#) [1](#) [M.MSFMGHQPQSQAVGYTFSQPTNAPNK.E](#) [15229](#)

148. [gi|220696535|gb|EED52877.1|](#) Mass: 11403 Score: 169 Queries matched: 19 emPAI: 1.20

60S ribosomal protein L30, putative [Aspergillus flavus NRRL3357]

| Query                 | Observed                 | Mr(expt)                  | Mr(calc)                  | Delta                  | Miss              | Score                | Expect                  | Rank              | Peptide                                                                                                |
|-----------------------|--------------------------|---------------------------|---------------------------|------------------------|-------------------|----------------------|-------------------------|-------------------|--------------------------------------------------------------------------------------------------------|
| <a href="#">697</a>   | <a href="#">481.8136</a> | <a href="#">961.6127</a>  | <a href="#">961.5630</a>  | <a href="#">0.0497</a> | <a href="#">1</a> | <a href="#">4</a>    | <a href="#">77</a>      | <a href="#">1</a> | <a href="#">R.LALVMKSGK.V</a>                                                                          |
| <a href="#">915</a>   | <a href="#">503.9706</a> | <a href="#">1005.9267</a> | <a href="#">1003.5046</a> | <a href="#">2.4221</a> | <a href="#">1</a> | <a href="#">7</a>    | <a href="#">32</a>      | <a href="#">5</a> | <a href="#">K.KNADSINSR.L</a>                                                                          |
| <a href="#">2821</a>  | <a href="#">660.1596</a> | <a href="#">1318.3047</a> | <a href="#">1316.6322</a> | <a href="#">1.6725</a> | <a href="#">0</a> | <a href="#">(57)</a> | <a href="#">0.0003</a>  | <a href="#">1</a> | <a href="#">K.SELEYAMLAK.A</a> <a href="#">2810</a>                                                    |
| <a href="#">2956</a>  | <a href="#">667.5656</a> | <a href="#">1333.1167</a> | <a href="#">1332.6271</a> | <a href="#">0.4896</a> | <a href="#">0</a> | <a href="#">58</a>   | <a href="#">0.00026</a> | <a href="#">1</a> | <a href="#">K.SELEYAMLAK.A</a> <a href="#">2954</a> <a href="#">2960</a> <a href="#">2970</a>          |
| <a href="#">4254</a>  | 738.7401                 | 1475.4657                 | 1475.9187                 | -0.4530                | 1                 | 17                   | 3.2                     | 2                 | K.AKLVIIAANTPPLR.K <a href="#">4230</a> <a href="#">4261</a> <a href="#">4270</a>                      |
| <a href="#">5587</a>  | 537.6095                 | 1609.8067                 | 1606.9480                 | 2.8587                 | 2                 | 1                    | 1.1e+02                 | 10                | R.LALVMKSGKVTLGYS.S                                                                                    |
| <a href="#">9712</a>  | <a href="#">670.7969</a> | <a href="#">2009.3687</a> | <a href="#">2007.9585</a> | <a href="#">1.4102</a> | <a href="#">0</a> | <a href="#">61</a>   | <a href="#">0.00011</a> | <a href="#">1</a> | <a href="#">K.APVHHSFGNNIELGTACGK.L</a> <a href="#">9698</a> <a href="#">9699</a> <a href="#">9704</a> |
| <a href="#">11536</a> | <a href="#">747.8132</a> | <a href="#">2240.4177</a> | <a href="#">2240.0995</a> | <a href="#">0.3183</a> | <a href="#">1</a> | <a href="#">(5)</a>  | <a href="#">42</a>      | <a href="#">6</a> | <a href="#">K.LFRTSTMAVLDAAGSDILTSQ.-</a>                                                              |
| <a href="#">11618</a> | 752.4715                 | 2254.3927                 | 2256.0944                 | -1.7017                | 1                 | 6                    | 34                      | 4                 | K.LFRTSTMAVLDAAGSDILTSQ.-                                                                              |

149. [gi|220693968|gb|EED50313.1|](#) Mass: 56416 Score: 168 Queries matched: 27 emPAI: 0.49

UDP-N-acetylglucosamine pyrophosphorylase [Aspergillus flavus NRRL3357]

| Query                 | Observed                  | Mr(expt)                  | Mr(calc)                  | Delta                   | Miss              | Score               | Expect                  | Rank              | Peptide                                                                            |
|-----------------------|---------------------------|---------------------------|---------------------------|-------------------------|-------------------|---------------------|-------------------------|-------------------|------------------------------------------------------------------------------------|
| <a href="#">1322</a>  | <a href="#">546.6921</a>  | <a href="#">1091.3697</a> | <a href="#">1090.5771</a> | <a href="#">0.7926</a>  | <a href="#">0</a> | <a href="#">51</a>  | <a href="#">0.0016</a>  | <a href="#">1</a> | <a href="#">K.SLFQIQAER.I</a> <a href="#">1315</a>                                 |
| <a href="#">1345</a>  | 1096.8880                 | 1095.8807                 | 1096.6492                 | -0.7684                 | 1                 | 5                   | 52                      | 7                 | R.EIKAPAVIEK.E                                                                     |
| <a href="#">1469</a>  | <a href="#">560.7176</a>  | <a href="#">1119.4207</a> | <a href="#">1119.5560</a> | <a href="#">-0.1353</a> | <a href="#">1</a> | <a href="#">28</a>  | <a href="#">0.3</a>     | <a href="#">1</a> | <a href="#">R.REDEFSPLK.N</a>                                                      |
| <a href="#">2271</a>  | 630.0171                  | 1258.0197                 | 1257.6864                 | 0.3334                  | 0                 | 10                  | 18                      | 4                 | K.VAVVLMAGGQGR.L                                                                   |
| <a href="#">2414</a>  | 637.7276                  | 1273.4407                 | 1271.7085                 | 1.7322                  | 0                 | 20                  | 1.8                     | 2                 | R.NATESVGLILQK.N                                                                   |
| <a href="#">3626</a>  | 468.5912                  | 1402.7517                 | 1402.7932                 | -0.0415                 | 1                 | 3                   | 77                      | 8                 | K.SLFQIQAERIAK.L                                                                   |
| <a href="#">4071</a>  | <a href="#">728.2331</a>  | <a href="#">1454.4517</a> | <a href="#">1453.7102</a> | <a href="#">0.7415</a>  | <a href="#">0</a> | <a href="#">40</a>  | <a href="#">0.014</a>   | <a href="#">1</a> | <a href="#">R.AANIVNHYSFR.F</a>                                                    |
| <a href="#">6633</a>  | <a href="#">844.4526</a>  | <a href="#">1686.8907</a> | <a href="#">1685.8274</a> | <a href="#">1.0633</a>  | <a href="#">0</a> | <a href="#">37</a>  | <a href="#">0.029</a>   | <a href="#">1</a> | <a href="#">K.AQLFHQLSNFDPNR.I</a> <a href="#">6621</a>                            |
| <a href="#">7018</a>  | <a href="#">860.4726</a>  | <a href="#">1718.9307</a> | <a href="#">1719.8654</a> | <a href="#">-0.9347</a> | <a href="#">0</a> | <a href="#">1</a>   | <a href="#">1.1e+02</a> | <a href="#">2</a> | <a href="#">K.EAIPWYVMTSGPTR.K</a>                                                 |
| <a href="#">8790</a>  | <a href="#">633.6385</a>  | <a href="#">1897.8937</a> | <a href="#">1898.0408</a> | <a href="#">-0.1470</a> | <a href="#">1</a> | <a href="#">(4)</a> | <a href="#">56</a>      | <a href="#">3</a> | <a href="#">K.VAVVLMAGGQGR.LGSSAPK.G</a>                                           |
| <a href="#">8978</a>  | <a href="#">639.6675</a>  | <a href="#">1915.9807</a> | <a href="#">1914.0357</a> | <a href="#">1.9450</a>  | <a href="#">1</a> | <a href="#">7</a>   | <a href="#">27</a>      | <a href="#">2</a> | <a href="#">K.VAVVLMAGGQGR.LGSSAPK.G</a> <a href="#">8933</a> <a href="#">8936</a> |
| <a href="#">9029</a>  | <a href="#">962.3016</a>  | <a href="#">1922.5887</a> | <a href="#">1921.0237</a> | <a href="#">1.5650</a>  | <a href="#">0</a> | <a href="#">74</a>  | <a href="#">5.3e-06</a> | <a href="#">1</a> | <a href="#">K.LEQFVFDVFPLTPLEK.F</a> <a href="#">9025</a>                          |
| <a href="#">9306</a>  | <a href="#">654.2525</a>  | <a href="#">1959.7357</a> | <a href="#">1956.9186</a> | <a href="#">2.8171</a>  | <a href="#">0</a> | <a href="#">20</a>  | <a href="#">1.5</a>     | <a href="#">1</a> | <a href="#">R.GIEHIHTYCVDNCLVK.V</a>                                               |
| <a href="#">9901</a>  | <a href="#">1016.3751</a> | <a href="#">2030.7357</a> | <a href="#">2029.0593</a> | <a href="#">1.6765</a>  | <a href="#">0</a> | <a href="#">44</a>  | <a href="#">0.0047</a>  | <a href="#">1</a> | <a href="#">K.AAVAPDGNNGGIYQALITSGVR.E</a>                                         |
| <a href="#">11407</a> | 741.6042                  | 2221.7907                 | 2221.0750                 | 0.7157                  | 1                 | 3                   | 59                      | 2                 | K.NGKPDVVEYSEIDKETAEAK.D                                                           |
| <a href="#">11546</a> | <a href="#">748.6329</a>  | <a href="#">2242.8767</a> | <a href="#">2244.1862</a> | <a href="#">-1.3095</a> | <a href="#">1</a> | <a href="#">2</a>   | <a href="#">82</a>      | <a href="#">9</a> | <a href="#">K.SKAAVAPDGNNGGIYQALITSGVR.E</a>                                       |
| <a href="#">12344</a> | <a href="#">787.6045</a>  | <a href="#">2359.7917</a> | <a href="#">2361.1859</a> | <a href="#">-1.3942</a> | <a href="#">1</a> | <a href="#">5</a>   | <a href="#">39</a>      | <a href="#">6</a> | <a href="#">-.MAAAIKETVSNLLHGSDNTPR.Q</a>                                          |
| <a href="#">14053</a> | <a href="#">871.4162</a>  | <a href="#">2611.2267</a> | <a href="#">2610.2735</a> | <a href="#">0.9533</a>  | <a href="#">0</a> | <a href="#">5</a>   | <a href="#">33</a>      | <a href="#">1</a> | <a href="#">K.TQDGPVTLPEPLPEVATASIMSDPK.D</a> <a href="#">14019</a>                |
| <a href="#">14701</a> | <a href="#">909.3325</a>  | <a href="#">2724.9757</a> | <a href="#">2723.4574</a> | <a href="#">1.5183</a>  | <a href="#">1</a> | <a href="#">3</a>   | <a href="#">53</a>      | <a href="#">6</a> | <a href="#">K.LEQFVFDVFPLTPLEKFAIEVR.R</a> <a href="#">14682</a>                   |
| <a href="#">15227</a> | <a href="#">961.8249</a>  | <a href="#">2882.4527</a> | <a href="#">2879.5585</a> | <a href="#">2.8942</a>  | <a href="#">2</a> | <a href="#">10</a>  | <a href="#">11</a>      | <a href="#">1</a> | <a href="#">K.LEQFVFDVFPLTPLEKFAIEVRR.E</a>                                        |

150. [gi|220696166|gb|EED52508.1|](#) Mass: 14207 Score: 167 Queries matched: 8 emPAI: 0.54

small nuclear ribonucleoprotein (LSM7), putative [Aspergillus flavus NRRL3357]

| Query                | Observed        | Mr(expt)         | Mr(calc)         | Delta          | Miss | Score       | Expect         | Rank     | Peptide                                                                                  |
|----------------------|-----------------|------------------|------------------|----------------|------|-------------|----------------|----------|------------------------------------------------------------------------------------------|
| <a href="#">5113</a> | 523.9252        | 1568.7537        | 1567.6169        | 1.1369         | 1    | 6           | 37             | 6        | K.ESMRDDEGNENTR.S                                                                        |
| <a href="#">5547</a> | <b>804.3386</b> | <b>1606.6627</b> | <b>1605.8073</b> | <b>0.8555</b>  | 0    | <b>74</b>   | <b>6e-06</b>   | <b>1</b> | <b>K.GFDQLMNLVLDVVK.E</b> <a href="#">5534</a> <a href="#">5560</a> <a href="#">5567</a> |
| <a href="#">5757</a> | <b>812.4766</b> | <b>1622.9387</b> | <b>1621.8022</b> | <b>1.1366</b>  | 0    | <b>(56)</b> | <b>0.00034</b> | <b>1</b> | <b>K.GFDQLMNLVLDVVK.E</b>                                                                |
| <a href="#">8355</a> | <b>926.8821</b> | <b>1851.7497</b> | <b>1851.9400</b> | <b>-0.1903</b> | 2    | <b>4</b>    | <b>53</b>      | <b>1</b> | <b>K.ENILDLSKYMDKEVR.V</b>                                                               |
| <a href="#">9691</a> | 669.8015        | 2006.3827        | 2007.0246        | -0.6419        | 2    | 2           | 82             | 5        | R.GGHAKSGGASGGAQQQEKPKK.E                                                                |

151. [gi|220690751|gb|EED47100.1|](#) Mass: 62152 Score: 166 Queries matched: 13 emPAI: 0.11

calnexin [Aspergillus flavus NRRL3357]

| Query                 | Observed        | Mr(expt)         | Mr(calc)         | Delta         | Miss | Score     | Expect        | Rank     | Peptide                                    |
|-----------------------|-----------------|------------------|------------------|---------------|------|-----------|---------------|----------|--------------------------------------------|
| <a href="#">599</a>   | 463.9866        | 925.9587         | 923.5076         | 2.4511        | 0    | 4         | 63            | 8        | K.ASSPAPAPVK.K                             |
| <a href="#">1736</a>  | <b>584.5091</b> | <b>1167.0037</b> | <b>1166.5608</b> | <b>0.4430</b> | 0    | <b>43</b> | <b>0.0076</b> | <b>1</b> | <b>K.IANPAYFEDK.T</b> <a href="#">1738</a> |
| <a href="#">2121</a>  | 620.1291        | 1238.2437        | 1236.5834        | 1.6603        | 0    | 2         | 98            | 6        | K.VSEAVSSSADTGK.G                          |
| <a href="#">2135</a>  | 621.6811        | 1241.3477        | 1241.6768        | -0.3291       | 1    | 13        | 7.2           | 2        | R.EKVDHFVGLAK.Q                            |
| <a href="#">4102</a>  | 730.6596        | 1459.3047        | 1458.7103        | 0.5945        | 2    | 6         | 41            | 9        | R.HKNPKTGEYEEK.H                           |
| <a href="#">4366</a>  | 1490.7590       | 1489.7517        | 1487.7997        | 1.9520        | 1    | 4         | 61            | 2        | K.NPAAHHAISAKFPK.K                         |
| <a href="#">6546</a>  | 841.7496        | 1681.4847        | 1680.6695        | 0.8153        | 0    | 2         | 1e+02         | 4        | K.CNDVSGCGPWSAPMK.K <a href="#">6517</a>   |
| <a href="#">7216</a>  | 871.2581        | 1740.5017        | 1739.7791        | 0.7226        | 0    | 84        | 5.7e-07       | 1        | K.APFLEQFTDDWESR.W <a href="#">7248</a>    |
| <a href="#">10470</a> | 1047.8006       | 2093.5867        | 2093.1269        | 0.4598        | 2    | 3         | 68            | 5        | R.EKVDHFVGLAKQDPVNAVK.Q                    |
| <a href="#">10546</a> | 702.3525        | 2104.0357        | 2102.0044        | 2.0314        | 1    | 1         | 1e+02         | 9        | K.WTAPMIDNPAYKGPWSPR.K                     |

152. [gi|220697491|gb|EED53832.1|](#) Mass: 20218 Score: 166 Queries matched: 26 emPAI: 0.59

60S ribosomal protein L11 [Aspergillus flavus NRRL3357]

| Query                 | Observed        | Mr(expt)         | Mr(calc)         | Delta         | Miss | Score     | Expect      | Rank     | Peptide                                                                                                                                      |
|-----------------------|-----------------|------------------|------------------|---------------|------|-----------|-------------|----------|----------------------------------------------------------------------------------------------------------------------------------------------|
| <a href="#">88</a>    | <b>706.4780</b> | <b>705.4707</b>  | <b>705.3810</b>  | <b>0.0897</b> | 0    | <b>17</b> | <b>3.5</b>  | <b>1</b> | <b>R.FDGIVR.-</b>                                                                                                                            |
| <a href="#">383</a>   | <b>859.5140</b> | <b>858.5067</b>  | <b>858.4447</b>  | <b>0.0621</b> | 0    | <b>23</b> | <b>1.1</b>  | <b>1</b> | <b>K.AEEILER.G</b> <a href="#">384</a>                                                                                                       |
| <a href="#">2351</a>  | 633.9931        | 1265.9717        | 1264.7252        | 1.2466        | 1    | 14        | 6.6         | 2        | R.NEKIAVHVTVR.G <a href="#">2350</a>                                                                                                         |
| <a href="#">2373</a>  | <b>635.5011</b> | <b>1268.9877</b> | <b>1267.7149</b> | <b>1.2728</b> | 2    | <b>6</b>  | <b>37</b>   | <b>1</b> | <b>R.YTVRTFGIRR.N</b>                                                                                                                        |
| <a href="#">2933</a>  | 666.1076        | 1330.2007        | 1331.6615        | -1.4608       | 2    | 1         | 1.4e+02     | 10       | K.DKSANPMRELRL.I                                                                                                                             |
| <a href="#">3202</a>  | 680.4231        | 1358.8317        | 1357.7201        | 1.1116        | 0    | 28        | 0.26        | 1        | K.LVLNISVGESGDR.L <a href="#">3180</a> <a href="#">3190</a> <a href="#">3196</a> <a href="#">3203</a>                                        |
| <a href="#">4912</a>  | 775.1651        | 1548.3157        | 1547.8195        | 0.4962        | 0    | 73        | 7.3e-06     | 1        | K.VLEQLSGQTPVYSK.A <a href="#">4911</a> <a href="#">4941</a> <a href="#">4945</a>                                                            |
| <a href="#">7087</a>  | 576.2405        | 1725.6997        | 1726.9577        | -1.2580       | 1    | 5         | 41          | 8        | R.IQKLVLNISVGESGDR.L                                                                                                                         |
| <a href="#">12012</a> | <b>770.8062</b> | <b>2309.3967</b> | <b>2308.1124</b> | <b>1.2843</b> | 0    | <b>26</b> | <b>0.3</b>  | <b>1</b> | <b>R.NFSETGNFGFGINEHIDLGIK.Y</b> <a href="#">12009</a> <a href="#">12010</a> <a href="#">12015</a> <a href="#">12019</a> <a href="#">12C</a> |
| <a href="#">14301</a> | <b>887.2652</b> | <b>2658.7737</b> | <b>2657.1171</b> | <b>1.6566</b> | 0    | <b>22</b> | <b>0.76</b> | <b>1</b> | <b>K.YDPGIGIYGMDFYCCMTRPGER.V</b>                                                                                                            |

153. [gi|220698179|gb|EED54519.1|](#) Mass: 124619 Score: 165 Queries matched: 40 emPAI: 0.11  
isoleucyl-tRNA synthetase ,cytoplasmic [Aspergillus flavus NRRL3357]

| Query                 | Observed  | Mr(expt)  | Mr(calc)  | Delta   | Miss | Score | Expect  | Rank | Peptide                                                                         |
|-----------------------|-----------|-----------|-----------|---------|------|-------|---------|------|---------------------------------------------------------------------------------|
| <a href="#">68</a>    | 687.8570  | 686.8497  | 686.4439  | 0.4058  | 1    | 10    | 24      | 7    | R.RTLGLK.T                                                                      |
| <a href="#">113</a>   | 723.4480  | 722.4407  | 722.3963  | 0.0444  | 1    | 24    | 0.6     | 4    | K.KFVSDK.K                                                                      |
| <a href="#">750</a>   | 325.0842  | 972.2307  | 972.5352  | -0.3045 | 1    | 14    | 8.3     | 3    | R.ETIERLGR.W                                                                    |
| <a href="#">888</a>   | 501.1101  | 1000.2057 | 999.5964  | 0.6093  | 1    | 11    | 13      | 8    | K.VDKITIPSK.Q                                                                   |
| <a href="#">1479</a>  | 561.3846  | 1120.7547 | 1120.5733 | 0.1815  | 1    | 9     | 22      | 9    | R.MQKVIEMAR.V <a href="#">1476</a>                                              |
| <a href="#">1661</a>  | 575.6806  | 1149.3467 | 1150.6386 | -1.2919 | 0    | 9     | 22      | 9    | K.FFEGQVALLK.K                                                                  |
| <a href="#">2469</a>  | 639.7816  | 1277.5487 | 1276.6697 | 0.8791  | 1    | 10    | 16      | 3    | K.KLGMSGLEAVEK.L <a href="#">2464</a> <a href="#">2474</a> <a href="#">2475</a> |
| <a href="#">2672</a>  | 651.6126  | 1301.2107 | 1300.6928 | 0.5179  | 0    | 9     | 20      | 7    | R.SVHFLAFPEVR.E                                                                 |
| <a href="#">3701</a>  | 708.1756  | 1414.3367 | 1415.7984 | -1.4616 | 2    | 0     | 1.5e+02 | 4    | K.KSLPSLTSNDVKK.F                                                               |
| <a href="#">4151</a>  | 488.9232  | 1463.7477 | 1462.7748 | 0.9729  | 2    | 7     | 35      | 5    | R.VSRMQKVIEMAR.V                                                                |
| <a href="#">4291</a>  | 740.8136  | 1479.6127 | 1478.7697 | 0.8430  | 2    | 3     | 71      | 2    | R.MQKVIEMARVSR.E                                                                |
| <a href="#">5654</a>  | 539.2192  | 1614.6357 | 1615.9886 | -1.3528 | 2    | 7     | 28      | 5    | K.AADKPIIKHLKGIGR.L <a href="#">5686</a>                                        |
| <a href="#">6146</a>  | 827.2071  | 1652.3997 | 1651.7842 | 0.6155  | 0    | 29    | 0.19    | 2    | K.SFPGDFIAEGLDQTR.G <a href="#">6120</a>                                        |
| <a href="#">7186</a>  | 870.6581  | 1739.3017 | 1739.0094 | 0.2924  | 1    | 7     | 26      | 3    | R.LYLINSPVVRAEPLR.F                                                             |
| <a href="#">7478</a>  | 884.3486  | 1766.6827 | 1764.9886 | 1.6941  | 1    | 19    | 1.8     | 2    | R.DFVGQHVKAADKPIIK.H <a href="#">7455</a> <a href="#">7485</a>                  |
| <a href="#">7984</a>  | 906.8366  | 1811.6587 | 1810.9505 | 0.7082  | 0    | 77    | 2.5e-06 | 1    | R.GLAPFTPFLTDTIYQK.L <a href="#">7980</a>                                       |
| <a href="#">8058</a>  | 909.7796  | 1817.5447 | 1816.9968 | 0.5479  | 2    | 8     | 23      | 4    | K.KLGMSGLEAVEKLGIEK.Y <a href="#">8062</a>                                      |
| <a href="#">8201</a>  | 612.6679  | 1834.9817 | 1834.9498 | 0.0319  | 2    | 2     | 80      | 5    | - .MSIDFPKEEELTLKR.W                                                            |
| <a href="#">10000</a> | 680.5342  | 2038.5807 | 2036.1994 | 2.3814  | 2    | 3     | 64      | 7    | K.KILVDGIELVEGDIVRR.G                                                           |
| <a href="#">10207</a> | 1031.2881 | 2060.5617 | 2060.9956 | -0.4339 | 1    | 4     | 51      | 4    | R.RFGWDTHGVPIEYEIDK.K                                                           |
| <a href="#">11346</a> | 738.5195  | 2212.5367 | 2210.1735 | 2.3632  | 2    | 0     | 1.2e+02 | 3    | K.YNVQYSVTADWPTLGKCLK.K                                                         |
| <a href="#">12631</a> | 802.2445  | 2403.7117 | 2404.2110 | -0.4993 | 1    | 0     | 1.2e+02 | 10   | K.GIGRLIVDSQITHSYPCWR.S                                                         |
| <a href="#">13141</a> | 825.4632  | 2473.3677 | 2472.1227 | 1.2450  | 1    | 3     | 55      | 2    | K.SQGVYVFDPKAEATNTNVMDR.W                                                       |
| <a href="#">13470</a> | 839.6719  | 2515.9937 | 2514.3159 | 1.6779  | 2    | 2     | 71      | 4    | K.FFEGQVALLKKSQGVYVFDPK.A                                                       |
| <a href="#">13654</a> | 846.9472  | 2537.8197 | 2536.2414 | 1.5784  | 1    | 0     | 1.1e+02 | 5    | K.AEATNTNVMDRWILASCQSLK.F                                                       |
| <a href="#">14156</a> | 880.2102  | 2637.6087 | 2636.3495 | 1.2592  | 0    | 48    | 0.0021  | 1    | K.IPCIIPQMLEGIEGSHWVPSFVK.E <a href="#">14157</a>                               |
| <a href="#">14257</a> | 885.8392  | 2654.4957 | 2652.3444 | 2.1513  | 0    | (32)  | 0.076   | 1    | K.IPCIIPQMLEGIEGSHWVPSFVK.E <a href="#">14255</a>                               |
| <a href="#">15890</a> | 1067.8582 | 3200.5527 | 3201.5304 | -0.9777 | 2    | 2     | 63      | 7    | K.TMNTSFMESVWVWFKQLFDKDLVYR.G                                                   |

154. [gi|220698604|gb|EED54944.1|](#) Mass: 45594 Score: 165 Queries matched: 19 emPAI: 0.23  
pyruvate dehydrogenase E1 component alpha subunit, putative [Aspergillus flavus NRRL3357]

| Query                | Observed | Mr(expt)  | Mr(calc)  | Delta  | Miss | Score | Expect  | Rank | Peptide                               |
|----------------------|----------|-----------|-----------|--------|------|-------|---------|------|---------------------------------------|
| <a href="#">668</a>  | 479.3491 | 956.6837  | 956.5655  | 0.1183 | 0    | 56    | 0.00047 | 1    | R.SIIGELLGR.R <a href="#">672</a>     |
| <a href="#">1154</a> | 531.7251 | 1061.4357 | 1060.5077 | 0.9281 | 0    | 19    | 2.6     | 3    | R.SSALTEYYK.R <a href="#">1155</a>    |
| <a href="#">1162</a> | 532.6421 | 1063.2697 | 1062.5379 | 0.7318 | 0    | 7     | 38      | 6    | K.VNGMDVLATK.A <a href="#">1165</a>   |
| <a href="#">3031</a> | 671.6086 | 1341.2027 | 1340.6871 | 0.5157 | 1    | 3     | 89      | 8    | R.MRSTHDPPIAGLK.Q                     |
| <a href="#">3671</a> | 705.7686 | 1409.5227 | 1406.6963 | 2.8264 | 1    | 1     | 1.3e+02 | 10   | K.VMTEDELKALDK.A <a href="#">3650</a> |

|                       |                 |                  |                  |                |          |           |                |          |                                                                      |
|-----------------------|-----------------|------------------|------------------|----------------|----------|-----------|----------------|----------|----------------------------------------------------------------------|
| <a href="#">4333</a>  | 743.7826        | 1485.5507        | 1483.7163        | 1.8345         | 2        | 1         | 1.2e+02        | 3        | R.MEMAADRLYKEK.K                                                     |
| <a href="#">5909</a>  | 818.7666        | 1635.5187        | 1634.8225        | 0.6962         | 1        | 1         | 1.1e+02        | 4        | K.ILDWKVMTTEDELK.A                                                   |
| <a href="#">6854</a>  | <b>852.6761</b> | <b>1703.3377</b> | <b>1702.8501</b> | <b>0.4876</b>  | <b>0</b> | <b>71</b> | <b>1.2e-05</b> | <b>1</b> | <b>K.LWNLPLVLFGCENNK.Y</b> <a href="#">6859</a> <a href="#">6873</a> |
| <a href="#">7745</a>  | 894.7536        | 1787.4927        | 1786.9777        | 0.5150         | 2        | 2         | 96             | 9        | - .MLFRTAWARQAAPLR.R                                                 |
| <a href="#">10086</a> | <b>683.3149</b> | <b>2046.9227</b> | <b>2047.9673</b> | <b>-1.0446</b> | <b>0</b> | <b>0</b>  | <b>1.2e+02</b> | <b>9</b> | <b>K.NYAVSGNGPLVMEYVTYR.Y</b>                                        |
| <a href="#">11630</a> | 753.3509        | 2257.0307        | 2258.9653        | -1.9346        | 2        | 2         | 75             | 10       | K.QMYHDMVSTRRMEMAADR.L                                               |
| <a href="#">12212</a> | <b>780.1839</b> | <b>2337.5297</b> | <b>2335.0638</b> | <b>2.4659</b>  | <b>0</b> | <b>2</b>  | <b>71</b>      | <b>3</b> | <b>R.AFVDEEVSLAENMPVPDNSTR.I</b>                                     |
| <a href="#">12321</a> | <b>786.5015</b> | <b>2356.4827</b> | <b>2354.1437</b> | <b>2.3390</b>  | <b>0</b> | <b>55</b> | <b>0.00035</b> | <b>1</b> | <b>R.GFCHLSTGQEA VATGIEHAITR.D</b>                                   |

155. [gi|220689889|gb|EED46239.1|](#) Mass: 52539 Score: 164 Queries matched: 19 emPAI: 0.13

autophagic serine protease Alp2 [Aspergillus flavus NRRL3357]

| Query                 | Observed  | Mr(expt)  | Mr(calc)  | Delta   | Miss | Score | Expect  | Rank | Peptide                                                                                                         |
|-----------------------|-----------|-----------|-----------|---------|------|-------|---------|------|-----------------------------------------------------------------------------------------------------------------|
| <a href="#">653</a>   | 475.5266  | 949.0387  | 948.4341  | 0.6046  | 0    | 14    | 7.5     | 1    | R.AYFSNYGK.C                                                                                                    |
| <a href="#">1444</a>  | 558.6681  | 1115.3217 | 1114.5295 | 0.7922  | 0    | 43    | 0.0095  | 1    | R.DSLSFGTFNK.Y                                                                                                  |
| <a href="#">2990</a>  | 669.2466  | 1336.4787 | 1335.6565 | 0.8222  | 1    | 18    | 2.5     | 3    | K.GSVANMSLGGGKSR.T <a href="#">2986</a> <a href="#">2992</a> <a href="#">2996</a>                               |
| <a href="#">3769</a>  | 475.5265  | 1423.5577 | 1424.7082 | -1.1505 | 1    | 10    | 16      | 1    | K.GFKGSVANMSLGGGK.S                                                                                             |
| <a href="#">5936</a>  | 819.6591  | 1637.3037 | 1635.8767 | 1.4271  | 2    | 5     | 43      | 4    | K.VKGFKGSVANMSLGGGK.S                                                                                           |
| <a href="#">10393</a> | 1041.8631 | 2081.7117 | 2080.0299 | 1.6818  | 0    | 72    | 8.1e-06 | 1    | K.CTDIFAPGLNILSTWTGSK.H <a href="#">10368</a> <a href="#">10390</a> <a href="#">10394</a> <a href="#">10399</a> |
| <a href="#">12424</a> | 792.3065  | 2373.8977 | 2373.1635 | 0.7342  | 0    | 16    | 3.3     | 1    | R.SSGSGTMSDVVLGVEWAVQSHLK.K <a href="#">12419</a> <a href="#">12426</a>                                         |
| <a href="#">12550</a> | 797.8412  | 2390.5017 | 2389.1584 | 1.3433  | 0    | (9)   | 16      | 1    | R.SSGSGTMSDVVLGVEWAVQSHLK.K                                                                                     |
| <a href="#">13488</a> | 840.8545  | 2519.5417 | 2517.2534 | 2.2884  | 1    | 0     | 1e+02   | 10   | R.SSGSGTMSDVVLGVEWAVQSHLKK.A                                                                                    |
| <a href="#">14818</a> | 920.9092  | 2759.7057 | 2757.4120 | 2.2937  | 1    | 1     | 86      | 6    | K.VLRSSSGSGTMSDVVLGVEWAVQSHLK.K                                                                                 |

156. [gi|220695424|gb|EED51767.1|](#) Mass: 44509 Score: 164 Queries matched: 18 emPAI: 0.33

Ketol-acid reductoisomerase [Aspergillus flavus NRRL3357]

| Query                 | Observed  | Mr(expt)  | Mr(calc)  | Delta   | Miss | Score | Expect  | Rank | Peptide                                                                          |
|-----------------------|-----------|-----------|-----------|---------|------|-------|---------|------|----------------------------------------------------------------------------------|
| <a href="#">2065</a>  | 615.7411  | 1229.4677 | 1229.5564 | -0.0887 | 0    | 17    | 3.3     | 1    | K.EVYSDLYGER.G                                                                   |
| <a href="#">2323</a>  | 632.7161  | 1263.4177 | 1262.6507 | 0.7671  | 0    | 23    | 0.8     | 2    | K.NLFDVNTAIEK.G                                                                  |
| <a href="#">4713</a>  | 765.8176  | 1529.6207 | 1528.7715 | 0.8493  | 0    | 46    | 0.0041  | 1    | K.TLYFSHGFSVPFK.E <a href="#">4705</a> <a href="#">4709</a> <a href="#">4714</a> |
| <a href="#">6039</a>  | 823.6246  | 1645.2347 | 1644.7743 | 0.4604  | 2    | 10    | 17      | 1    | R.SLDYNSQKDYREK.Y                                                                |
| <a href="#">7081</a>  | 576.1295  | 1725.3667 | 1722.9740 | 2.3927  | 1    | 3     | 62      | 8    | K.AAANALPRVTLSSSTPVR.G                                                           |
| <a href="#">7325</a>  | 876.6661  | 1751.3177 | 1749.8897 | 1.4280  | 0    | 3     | 70      | 3    | R.GINSSIAVYQDVTGQAK.E                                                            |
| <a href="#">10029</a> | 681.6545  | 2041.9417 | 2038.9782 | 2.9635  | 2    | 3     | 72      | 6    | K.YEKEMQDIRDLEIWR.A                                                              |
| <a href="#">10504</a> | 700.4442  | 2098.3107 | 2097.0895 | 1.2213  | 1    | 50    | 0.0014  | 1    | R.FKDNLKPLFNELYDSVR.D <a href="#">10501</a>                                      |
| <a href="#">13947</a> | 864.7132  | 2591.1177 | 2591.2040 | -0.0863 | 2    | 3     | 55      | 6    | K.NISFAGHEETVYEREDWPREK.L <a href="#">13956</a>                                  |
| <a href="#">15066</a> | 944.1335  | 2829.3787 | 2826.5201 | 2.8586  | 0    | 55    | 0.00034 | 1    | K.GTIVMNLSDAAQSETWPTIKPLITK.G <a href="#">15068</a>                              |
| <a href="#">15109</a> | 948.9422  | 2843.8047 | 2842.5150 | 1.2897  | 0    | (33)  | 0.05    | 1    | K.GTIVMNLSDAAQSETWPTIKPLITK.G                                                    |
| <a href="#">16150</a> | 1111.7692 | 3332.2857 | 3333.5751 | -1.2894 | 1    | 0     | 82      | 6    | K.AIAMGVAVGSGYLYETTFEKEVYSDLYGER.G                                               |



157. [gi|220693676|gb|EED50021.1|](#) Mass: 41507 Score: 162 Queries matched: 8 emPAI: 0.08

adhesion regulating molecule, putative [Aspergillus flavus NRRL3357]

| Query                 | Observed        | Mr(expt)         | Mr(calc)         | Delta         | Miss     | Score     | Expect         | Rank     | Peptide                                                                                          |
|-----------------------|-----------------|------------------|------------------|---------------|----------|-----------|----------------|----------|--------------------------------------------------------------------------------------------------|
| <a href="#">2413</a>  | 637.5896        | 1273.1647        | 1274.6554        | -1.4906       | 1        | 3         | 93             | 10       | K.IPVENGGFMRR.G <a href="#">2422</a>                                                             |
| <a href="#">10155</a> | <b>686.1912</b> | <b>2055.5517</b> | <b>2053.1320</b> | <b>2.4197</b> | <b>0</b> | <b>5</b>  | <b>46</b>      | <b>7</b> | <b>K.VLHSPQFSQSLASLTVAIR.D <a href="#">10133</a> <a href="#">10156</a> <a href="#">10157</a></b> |
| <a href="#">14818</a> | <b>920.9092</b> | <b>2759.7057</b> | <b>2758.4137</b> | <b>1.2920</b> | <b>0</b> | <b>99</b> | <b>1.5e-08</b> | <b>1</b> | <b>K.LGDIVNTLLQGEDVDVEHEIANLPR.G <a href="#">14820</a></b>                                       |

158. [gi|220699147|gb|EED55486.1|](#) Mass: 93932 Score: 162 Queries matched: 19 emPAI: 0.11

iron superoxide dismutase A, putative [Aspergillus flavus NRRL3357]

| Query                 | Observed         | Mr(expt)         | Mr(calc)         | Delta          | Miss     | Score     | Expect         | Rank     | Peptide                                               |
|-----------------------|------------------|------------------|------------------|----------------|----------|-----------|----------------|----------|-------------------------------------------------------|
| <a href="#">191</a>   | 389.3446         | 776.6747         | 776.4214         | 0.2533         | 0        | 20        | 2              | 5        | -.MAASLIR.T                                           |
| <a href="#">1015</a>  | 518.1371         | 1034.2597        | 1032.5716        | 1.6881         | 0        | 6         | 44             | 5        | K.AAGVAGLTFAR.G                                       |
| <a href="#">1261</a>  | <b>541.4061</b>  | <b>1080.7977</b> | <b>1080.4580</b> | <b>0.3397</b>  | <b>0</b> | <b>6</b>  | <b>34</b>      | <b>9</b> | <b>R.DGELMNVCK.C</b>                                  |
| <a href="#">1384</a>  | 553.3781         | 1104.7417        | 1102.5804        | 2.1613         | 1        | 8         | 30             | 10       | R.ILSMNPKE.S                                          |
| <a href="#">1466</a>  | 560.4696         | 1118.9247        | 1118.6019        | 0.3228         | 0        | 11        | 15             | 4        | K.CALGHIPVPR.T <a href="#">1465</a>                   |
| <a href="#">2248</a>  | <b>628.6296</b>  | <b>1255.2447</b> | <b>1254.6204</b> | <b>0.6243</b>  | <b>0</b> | <b>44</b> | <b>0.0062</b>  | <b>1</b> | <b>K.SQGGGEPPSGALAK.A</b>                             |
| <a href="#">3686</a>  | <b>707.2681</b>  | <b>1412.5217</b> | <b>1409.6721</b> | <b>2.8496</b>  | <b>0</b> | <b>7</b>  | <b>32</b>      | <b>1</b> | <b>R.EHNPALASLCGK.C</b>                               |
| <a href="#">3773</a>  | 713.2901         | 1424.5657        | 1423.7532        | 0.8126         | 1        | 6         | 39             | 4        | R.TTNGLQGLEHRAK.D                                     |
| <a href="#">4676</a>  | <b>763.4736</b>  | <b>1524.9327</b> | <b>1524.7685</b> | <b>0.1642</b>  | <b>1</b> | <b>6</b>  | <b>35</b>      | <b>3</b> | <b>R.FGPRYGISADSLR.R</b>                              |
| <a href="#">5659</a>  | <b>808.5931</b>  | <b>1615.1717</b> | <b>1613.7573</b> | <b>1.4144</b>  | <b>0</b> | <b>26</b> | <b>0.38</b>    | <b>1</b> | <b>K.AIDESFGSLGEFQSK.M</b>                            |
| <a href="#">8553</a>  | <b>937.5671</b>  | <b>1873.1197</b> | <b>1871.9716</b> | <b>1.1481</b>  | <b>0</b> | <b>30</b> | <b>0.16</b>    | <b>1</b> | <b>K.MNAALAGIQSGWAWLVK.D</b>                          |
| <a href="#">8727</a>  | 630.9705         | 1889.8897        | 1887.9665        | 1.9232         | 0        | (1)       | 1.2e+02        | 6        | K.MNAALAGIQSGWAWLVK.D                                 |
| <a href="#">10379</a> | <b>1041.3566</b> | <b>2080.6987</b> | <b>2080.0364</b> | <b>0.6623</b>  | <b>0</b> | <b>90</b> | <b>1.2e-07</b> | <b>1</b> | <b>K.ATLPDLAYDYGALEPSISGK.I <a href="#">10376</a></b> |
| <a href="#">10943</a> | 720.3012         | 2157.8817        | 2157.2018        | 0.6799         | 2        | 0         | 1.3e+02        | 8        | R.TALRAGASATPKAAGVAGLTFAR.G                           |
| <a href="#">11353</a> | 738.6379         | 2212.8917        | 2211.1661        | 1.7256         | 2        | 4         | 49             | 10       | R.NLFRHAIIVTRWSDLGDGR.S                               |
| <a href="#">12645</a> | <b>802.8109</b>  | <b>2405.4107</b> | <b>2406.1849</b> | <b>-0.7742</b> | <b>1</b> | <b>3</b>  | <b>56</b>      | <b>1</b> | <b>K.EGLQSKDDVPAMP<sup>+</sup>SLTPLEAHR.L</b>         |
| <a href="#">14882</a> | 926.0502         | 2775.1287        | 2773.4320        | 1.6967         | 1        | 0         | 99             | 4        | R.AISGIFESAITDDTLPGQRILSMNPK.E                        |

159. [gi|220698234|gb|EED54574.1|](#) Mass: 10101 Score: 161 Queries matched: 5 emPAI: 0.80

DUF543 domain protein [Aspergillus flavus NRRL3357]

| Query                | Observed        | Mr(expt)         | Mr(calc)         | Delta         | Miss     | Score     | Expect         | Rank     | Peptide                                       |
|----------------------|-----------------|------------------|------------------|---------------|----------|-----------|----------------|----------|-----------------------------------------------|
| <a href="#">1882</a> | 599.5156        | 1197.0167        | 1196.5098        | 0.5069        | 0        | 26        | 0.38           | 2        | R.AWEEADSSFR.R                                |
| <a href="#">3586</a> | 700.1756        | 1398.3367        | 1398.7718        | -0.4351       | 0        | 45        | 0.0045         | 1        | R.ATKPVSEALLNEK.W <a href="#">3599</a>        |
| <a href="#">3989</a> | <b>723.8786</b> | <b>1445.7427</b> | <b>1443.7412</b> | <b>2.0016</b> | <b>0</b> | <b>83</b> | <b>8.2e-07</b> | <b>1</b> | <b>R.AWPAWVGLGFAGR.A <a href="#">3974</a></b> |

160. [gi|220698203|gb|EED54543.1|](#) Mass: 10741 Score: 160 Queries matched: 6 emPAI: 1.30

ubiquinol-cytochrome C reductase complex subunit UcrQ, putative [Aspergillus flavus NRRL3357]

| Query                | Observed        | Mr(expt)         | Mr(calc)         | Delta          | Miss     | Score     | Expect         | Rank     | Peptide                                                |
|----------------------|-----------------|------------------|------------------|----------------|----------|-----------|----------------|----------|--------------------------------------------------------|
| <a href="#">1393</a> | <b>554.1731</b> | <b>1106.3317</b> | <b>1106.5720</b> | <b>-0.2403</b> | <b>0</b> | <b>53</b> | <b>0.00078</b> | <b>1</b> | <b>R.IASYSLS<sup>+</sup>PNR.Q <a href="#">1411</a></b> |

[8879](#) **636.2372** **1905.6897** **1903.9805** **1.7092** **0** **64** **5.3e-05** **1** **R.QRPLAGTAHAFFNTFR.R** [8883](#)  
[9721](#) **1006.2466** **2010.4787** **2007.9262** **2.5525** **0** **42** **0.0088** **1** **K.NGVFLGTWGDGFCPTPQR.I** [9722](#)

161. [gi|220690400|gb|EED46749.1|](#) **Mass:** 54446 **Score:** 159 **Queries matched:** 22 **emPAI:** 0.12

D-3-phosphoglycerate dehydrogenase [Aspergillus flavus NRRL3357]

| Query                 | Observed  | Mr(expt)  | Mr(calc)  | Delta   | Miss | Score | Expect  | Rank | Peptide                                                                                                                     |
|-----------------------|-----------|-----------|-----------|---------|------|-------|---------|------|-----------------------------------------------------------------------------------------------------------------------------|
| <a href="#">152</a>   | 753.0710  | 752.0637  | 752.3123  | -0.2486 | 0    | 11    | 10      | 2    | K.QMTDSR.G                                                                                                                  |
| <a href="#">514</a>   | 454.0421  | 906.0697  | 907.5240  | -1.4542 | 0    | 24    | 0.72    | 2    | R.DVHVGIR.S <a href="#">512</a>                                                                                             |
| <a href="#">1339</a>  | 548.7561  | 1095.4977 | 1094.5356 | 0.9621  | 0    | 21    | 1.3     | 2    | R.DGSYLINASR.G                                                                                                              |
| <a href="#">1888</a>  | 599.7531  | 1197.4917 | 1197.6717 | -0.1800 | 0    | 4     | 58      | 1    | R.AIGVEVGDALVR.Y                                                                                                            |
| <a href="#">2271</a>  | 630.0171  | 1258.0197 | 1257.6452 | 0.3745  | 0    | 13    | 9.9     | 2    | K.SSLPEDQLIEK.I                                                                                                             |
| <a href="#">2651</a>  | 650.2956  | 1298.5767 | 1297.7030 | 0.8737  | 0    | 20    | 1.5     | 1    | K.HLKPFATEDIK.V                                                                                                             |
| <a href="#">2671</a>  | 651.6116  | 1301.2087 | 1300.5717 | 0.6370  | 0    | 25    | 0.6     | 1    | R.SLTMDEPEHAR.V                                                                                                             |
| <a href="#">3160</a>  | 678.4461  | 1354.8777 | 1354.7569 | 0.1209  | 0    | 64    | 6.3e-05 | 1    | K.VLLENVNQTGR.D <a href="#">3168</a>                                                                                        |
| <a href="#">6515</a>  | 841.2901  | 1680.5657 | 1680.9087 | -0.3429 | 1    | 8     | 24      | 2    | R.DILTKQGYQVEFLK.S <a href="#">6514</a> <a href="#">6523</a> <a href="#">6533</a> <a href="#">6541</a> <a href="#">6580</a> |
| <a href="#">7466</a>  | 883.7046  | 1765.3947 | 1765.9509 | -0.5562 | 1    | 1     | 1.1e+02 | 7    | R.GSVVDIPALIHAMRSRK.V                                                                                                       |
| <a href="#">9070</a>  | 643.8479  | 1928.5217 | 1929.9003 | -1.3786 | 1    | 1     | 1.1e+02 | 9    | R.QFEQMRDGSYLINASR.G <a href="#">9075</a>                                                                                   |
| <a href="#">9763</a>  | 1008.7861 | 2015.5577 | 2015.0687 | 0.4890  | 0    | 79    | 1.5e-06 | 1    | R.YVNEGTTLGAVNLPEVALR.S                                                                                                     |
| <a href="#">10772</a> | 713.6659  | 2137.9757 | 2136.2266 | 1.7491  | 1    | 6     | 30      | 3    | R.SVAELVIAEIIALARQLGDR.S                                                                                                    |
| <a href="#">15365</a> | 986.2965  | 2955.8677 | 2953.4743 | 2.3934  | 0    | 11    | 9.1     | 1    | R.QVPTLESLLSQSDFVTCHVPELPETK.N                                                                                              |

162. [gi|220697509|gb|EED53850.1|](#) **Mass:** 56414 **Score:** 158 **Queries matched:** 22 **emPAI:** 0.33

translation initiation factor EF-2 gamma subunit, putative [Aspergillus flavus NRRL3357]

| Query                 | Observed  | Mr(expt)  | Mr(calc)  | Delta   | Miss | Score | Expect  | Rank | Peptide                                      |
|-----------------------|-----------|-----------|-----------|---------|------|-------|---------|------|----------------------------------------------|
| <a href="#">625</a>   | 936.1460  | 935.1387  | 934.4872  | 0.6515  | 1    | 12    | 11      | 4    | R.FKNELEK.N                                  |
| <a href="#">890</a>   | 1001.4650 | 1000.4577 | 1000.5917 | -0.1340 | 1    | 3     | 92      | 9    | R.LLGVKTADGK.Q                               |
| <a href="#">1783</a>  | 588.8671  | 1175.7197 | 1175.6233 | 0.0964  | 0    | 19    | 2       | 1    | K.IQCRPIFSR.V                                |
| <a href="#">2058</a>  | 615.3781  | 1228.7417 | 1227.7187 | 1.0230  | 0    | 8     | 24      | 1    | K.GGVAGGSILTGVLK.L <a href="#">2054</a>      |
| <a href="#">2136</a>  | 621.6846  | 1241.3547 | 1242.7085 | -1.3538 | 0    | 7     | 35      | 7    | K.FAVPGGLIGVGR.V <a href="#">2145</a>        |
| <a href="#">2880</a>  | 664.2276  | 1326.4407 | 1327.7823 | -1.3416 | 2    | 6     | 47      | 6    | R.LLGVKTADGKQAK.V                            |
| <a href="#">3185</a>  | 679.7031  | 1357.3917 | 1358.6136 | -1.2219 | 1    | 6     | 37      | 7    | K.SEKEIDPPCER.D                              |
| <a href="#">3339</a>  | 686.5621  | 1371.1097 | 1370.7194 | 0.3903  | 0    | 38    | 0.03    | 1    | R.VVSLFAEHNDLK.F                             |
| <a href="#">4488</a>  | 502.6092  | 1504.8057 | 1503.8409 | 0.9648  | 2    | 6     | 42      | 6    | R.FKNELEK.NITIK.L                            |
| <a href="#">4492</a>  | 753.6306  | 1505.2467 | 1504.7443 | 0.5024  | 0    | 10    | 14      | 1    | K.LSLTSPACTEIGEK.I                           |
| <a href="#">4569</a>  | 759.2431  | 1516.4717 | 1515.8621 | 0.6097  | 1    | 10    | 15      | 4    | K.STVVKAISEVQTVR.F <a href="#">4581</a>      |
| <a href="#">6255</a>  | 831.6676  | 1661.3207 | 1660.8308 | 0.4899  | 0    | 65    | 5.4e-05 | 1    | R.SFDVNKPGAIDEK.G                            |
| <a href="#">6319</a>  | 834.0436  | 1666.0727 | 1665.9301 | 0.1426  | 0    | 20    | 1.6     | 1    | R.GTVADGSPPIIPISQK.Y                         |
| <a href="#">10395</a> | 695.0005  | 2081.9797 | 2082.1837 | -0.2040 | 1    | 7     | 29      | 1    | K.FIRGTVADGSPPIIPISQK.Y                      |
| <a href="#">11247</a> | 733.8409  | 2198.5007 | 2197.1531 | 1.3476  | 0    | 66    | 3.1e-05 | 1    | K.YNIDAVNEYLVSHIPVPR.D <a href="#">11250</a> |

[13870](#) 859.2129 2574.6167 2574.3509 0.2658 2 0 1.1e+02 10 K.NEVLNVNIGSTATGAKVMGVKADAAK.L  
[15203](#) 958.7752 2873.3037 2870.5389 2.7648 1 24 0.46 1 R.SFDVKNKPGAIEIDELKGGVAGGSILTGVLK.L [15191](#)

163. [gi|220692416|gb|EED48763.1|](#) Mass: 25380 Score: 155 Queries matched: 5 emPAI: 0.13  
 conserved hypothetical protein [Aspergillus flavus NRRL3357]

| Query                 | Observed | Mr(expt)  | Mr(calc)  | Delta   | Miss | Score | Expect  | Rank | Peptide                                          |
|-----------------------|----------|-----------|-----------|---------|------|-------|---------|------|--------------------------------------------------|
| <a href="#">7746</a>  | 894.7706 | 1787.5267 | 1785.9373 | 1.5894  | 0    | 1     | 1.2e+02 | 6    | K.YDQGLLILVLNSANGPR.R                            |
| <a href="#">8217</a>  | 919.7316 | 1837.4487 | 1836.9774 | 0.4713  | 0    | 91    | 1.2e-07 | 1    | R.FNAPILYQSVPLNSFK.R <a href="#">8222</a>        |
| <a href="#">13334</a> | 834.0362 | 2499.0867 | 2500.2052 | -1.1184 | 1    | 4     |         | 53 7 | R.VMTVMIKYSIMSTFAFANSSEK.V <a href="#">13336</a> |

164. [gi|220694880|gb|EED51223.1|](#) Mass: 38139 Score: 154 Queries matched: 19 emPAI: 0.39  
 mitochondrial import receptor subunit (tom40), putative [Aspergillus flavus NRRL3357]

| Query                 | Observed | Mr(expt)  | Mr(calc)  | Delta   | Miss | Score | Expect  | Rank  | Peptide                                    |
|-----------------------|----------|-----------|-----------|---------|------|-------|---------|-------|--------------------------------------------|
| <a href="#">671</a>   | 958.3960 | 957.3887  | 957.5647  | -0.1760 | 1    | 7     |         | 34 10 | R.WSPKLVTK.T                               |
| <a href="#">1114</a>  | 527.5971 | 1053.1797 | 1052.5477 | 0.6320  | 0    | 32    | 0.084   | 1     | K.VFGMSPLFR.V <a href="#">1113</a>         |
| <a href="#">1719</a>  | 582.7866 | 1163.5587 | 1161.5567 | 2.0020  | 1    | 5     |         | 54 8  | K.YDFRSTFR.A                               |
| <a href="#">2979</a>  | 668.7716 | 1335.5287 | 1336.6735 | -1.1448 | 1    | 0     | 1.6e+02 | 2     | R.ASTFRAQVDSAGK.V                          |
| <a href="#">4544</a>  | 757.3701 | 1512.7257 | 1511.7806 | 0.9451  | 0    | 85    | 5e-07   | 1     | K.EVLLSNFMFSGLR.A <a href="#">4543</a>     |
| <a href="#">5216</a>  | 790.7471 | 1579.4797 | 1577.8525 | 1.6272  | 0    | 35    | 0.052   | 1     | R.AALGLPNPGTVDNIAR.E <a href="#">5203</a>  |
| <a href="#">5226</a>  | 527.5972 | 1579.7697 | 1580.8385 | -1.0688 | 1    | 21    | 1.3     | 1     | R.ADLTKVFGMSPLFR.V <a href="#">5223</a>    |
| <a href="#">7151</a>  | 579.8092 | 1736.4057 | 1733.9536 | 2.4521  | 1    | 10    |         | 13 2  | R.RAALGLPNPGTVDNIAR.E                      |
| <a href="#">7919</a>  | 903.3591 | 1804.7037 | 1803.9440 | 0.7597  | 0    | 24    | 0.54    | 1     | R.IAMPISLTFAGEIDQAK.Q <a href="#">7922</a> |
| <a href="#">10182</a> | 687.1332 | 2058.3777 | 2056.0663 | 2.3114  | 1    | 1     | 1.2e+02 | 9     | K.EVLLSNFMFSGLRADLTK.V                     |
| <a href="#">10449</a> | 698.0855 | 2091.2347 | 2088.9687 | 2.2660  | 0    | 1     | 1.1e+02 | 7     | K.VFMQGNFGSDGALAAVGNYSR.W                  |
| <a href="#">12529</a> | 797.1885 | 2388.5437 | 2390.2627 | -1.7190 | 2    | 2     |         | 73 8  | K.RIAMPISLTFAGEIDQAKQSAK.L                 |
| <a href="#">13236</a> | 829.5632 | 2485.6677 | 2486.2046 | -0.5369 | 0    | 1     | 1e+02   | 4     | R.VEAGVDMNLQFAPNAAAALMGGPSR.D              |
| <a href="#">13480</a> | 840.3822 | 2518.1247 | 2518.1944 | -0.0697 | 0    | (0)   | 1.1e+02 | 9     | R.VEAGVDMNLQFAPNAAAALMGGPSR.D              |

165. [gi|220701104|gb|EED57442.1|](#) Mass: 34750 Score: 154 Queries matched: 26 emPAI: 0.58  
 cytochrome C1/Cyt1, putative [Aspergillus flavus NRRL3357]

| Query                | Observed | Mr(expt)  | Mr(calc)  | Delta   | Miss | Score | Expect | Rank | Peptide                                                        |
|----------------------|----------|-----------|-----------|---------|------|-------|--------|------|----------------------------------------------------------------|
| <a href="#">610</a>  | 465.6791 | 929.3437  | 929.4719  | -0.1282 | 0    | 46    | 0.0047 | 1    | K.TFDHAALR.R <a href="#">614</a>                               |
| <a href="#">955</a>  | 509.8106 | 1017.6067 | 1016.5655 | 1.0412  | 0    | 21    | 1.4    | 1    | K.IVYSPPVSR.R <a href="#">950</a>                              |
| <a href="#">1644</a> | 573.5956 | 1145.1767 | 1144.6604 | 0.5163  | 1    | 37    | 0.042  | 1    | R.KIVYSPPVSR.R <a href="#">1646</a>                            |
| <a href="#">1730</a> | 584.0706 | 1166.1267 | 1165.6019 | 0.5248  | 0    | 45    | 0.0051 | 1    | K.LSDYIPAPYK.N <a href="#">1741</a>                            |
| <a href="#">2839</a> | 660.8641 | 1319.7137 | 1318.5758 | 1.1379  | 0    | 5     |        | 51 4 | R.EVCASCHSLTR.V                                                |
| <a href="#">4540</a> | 756.8726 | 1511.7307 | 1510.6796 | 1.0511  | 0    | 36    | 0.038  | 1    | R.SFVGVVMTVDEM.K.A <a href="#">4537</a>                        |
| <a href="#">4774</a> | 769.1146 | 1536.2147 | 1534.8719 | 1.3429  | 0    | 12    | 9.9    | 1    | R.AANGGALPPDLSLIVK.G <a href="#">4775</a> <a href="#">4789</a> |
| <a href="#">9930</a> | 679.0669 | 2034.1787 | 2032.9863 | 1.1924  | 1    | 7     |        | 28 2 | R.VPWRSFVGVVMTVDEM.K.A <a href="#">9935</a>                    |

|                       |           |           |           |         |   |      |         |   |                          |                                             |
|-----------------------|-----------|-----------|-----------|---------|---|------|---------|---|--------------------------|---------------------------------------------|
| <a href="#">9949</a>  | 1018.6816 | 2035.3487 | 2034.8993 | 0.4494  | 0 | 73   | 6.5e-06 | 1 | K.DVVEFLNWAAEPEMDDR.K    | <a href="#">9947</a> <a href="#">9984</a>   |
| <a href="#">10126</a> | 1026.8581 | 2051.7017 | 2050.8942 | 0.8075  | 0 | (17) | 2.9     | 1 | K.DVVEFLNWAAEPEMDDR.K    | <a href="#">10123</a> <a href="#">10136</a> |
| <a href="#">10635</a> | 1060.2886 | 2118.5627 | 2118.2275 | 0.3352  | 1 | 0    | 1.3e+02 | 6 | K.MGVKAIALLTGLFAVSVVVK.R |                                             |
| <a href="#">12141</a> | 776.2855  | 2325.8347 | 2326.9383 | -1.1036 | 0 | 3    | 61      | 5 | K.AMAEENEYDTEPNQGEIEK.R  | <a href="#">12138</a> <a href="#">12172</a> |

166. [gi|220692849|gb|EED49195.1|](#) Mass: 36696 Score: 153 Queries matched: 19 emPAI: 0.19

hydroxymethylbilane synthase, putative [Aspergillus flavus NRRL3357]

| Query                 | Observed  | Mr(expt)  | Mr(calc)  | Delta   | Miss | Score | Expect  | Rank | Peptide                                                                                    |
|-----------------------|-----------|-----------|-----------|---------|------|-------|---------|------|--------------------------------------------------------------------------------------------|
| <a href="#">64</a>    | 686.5530  | 685.5457  | 685.4374  | 0.1083  | 0    | 9     | 23      | 8    | R.DVLVIK.Q <a href="#">65</a>                                                              |
| <a href="#">506</a>   | 904.0040  | 902.9967  | 903.4086  | -0.4119 | 1    | 7     | 39      | 8    | R.DPRGYPAE.-                                                                               |
| <a href="#">8033</a>  | 606.3662  | 1816.0767 | 1817.9458 | -1.8691 | 0    | 5     | 47      | 7    | K.NGGMLYAVGQGALGIEIR.K                                                                     |
| <a href="#">8217</a>  | 919.7316  | 1837.4487 | 1837.0322 | 0.4165  | 2    | 5     | 43      | 3    | K.YPHLKVIDVRGNIGTR.L <a href="#">8219</a>                                                  |
| <a href="#">9345</a>  | 655.5512  | 1963.6317 | 1962.0357 | 1.5961  | 1    | 3     | 73      | 4    | K.NGGMLYAVGQGALGIEIRK.D                                                                    |
| <a href="#">9658</a>  | 668.3265  | 2001.9577 | 2000.9370 | 1.0208  | 0    | 0     | 1.3e+02 | 9    | K.DVPTTLPPACTLGPMMER.E                                                                     |
| <a href="#">10785</a> | 713.8812  | 2138.6217 | 2135.9542 | 2.6675  | 0    | 4     | 50      | 2    | R.DMLNIGHNETTFASTAER.S                                                                     |
| <a href="#">10958</a> | 1081.9201 | 2161.8257 | 2161.1089 | 0.7169  | 0    | 106   | 2.9e-09 | 1    | K.LDAEDSPYTCIILAAAGLLR.L <a href="#">10953</a> <a href="#">10962</a> <a href="#">10965</a> |
| <a href="#">12992</a> | 819.4645  | 2455.3717 | 2457.2646 | -1.8928 | 1    | 0     | 1.2e+02 | 6    | K.QGLPNMSLSDLPAGSVVGTSSIRR.T                                                               |
| <a href="#">13136</a> | 825.2125  | 2472.6157 | 2473.3250 | -0.7093 | 1    | 13    | 5.4     | 1    | R.LAKLDAEDSPYTCIILAAAGLLR.L <a href="#">13131</a> <a href="#">13167</a>                    |
| <a href="#">15254</a> | 967.4399  | 2899.2977 | 2896.5116 | 2.7861  | 2    | 7     | 21      | 2    | R.ISQYLDSKNGGMLYAVGQGALGIEIRK.D <a href="#">15253</a>                                      |

167. [gi|220689951|gb|EED46301.1|](#) Mass: 56683 Score: 153 Queries matched: 20 emPAI: 0.33

woronin body major protein precursor, putative [Aspergillus flavus NRRL3357]

| Query                 | Observed | Mr(expt)  | Mr(calc)  | Delta   | Miss | Score | Expect  | Rank | Peptide                                                                           |
|-----------------------|----------|-----------|-----------|---------|------|-------|---------|------|-----------------------------------------------------------------------------------|
| <a href="#">563</a>   | 458.1261 | 914.2377  | 913.4981  | 0.7396  | 0    | 28    | 0.28    | 1    | R.ALVINDGGR.E <a href="#">556</a>                                                 |
| <a href="#">1271</a>  | 542.6031 | 1083.1917 | 1082.5760 | 0.6157  | 0    | 56    | 0.00036 | 1    | R.YLGVDLFTR.Q <a href="#">1272</a>                                                |
| <a href="#">3784</a>  | 713.6616 | 1425.3087 | 1424.6684 | 0.6403  | 1    | 6     | 35      | 2    | R.ERYQEPTSYPR.F                                                                   |
| <a href="#">4397</a>  | 747.7491 | 1493.4837 | 1491.8046 | 1.6792  | 0    | 0     | 1.4e+02 | 3    | K.VLSTTTTVVDHPPAR.K                                                               |
| <a href="#">4427</a>  | 750.2351 | 1498.4557 | 1497.8191 | 0.6366  | 0    | 30    | 0.16    | 1    | K.QGIPVVPQGELFSK.I                                                                |
| <a href="#">4517</a>  | 754.8236 | 1507.6327 | 1506.8042 | 0.8285  | 0    | 1     | 1.1e+02 | 7    | R.QVSVEPVNPPSQVK.V                                                                |
| <a href="#">4615</a>  | 761.0221 | 1520.0297 | 1519.7188 | 0.3109  | 0    | (36)  | 0.035   | 1    | R.DNQIVAMTETGDVK.Q                                                                |
| <a href="#">4794</a>  | 769.8886 | 1537.7627 | 1535.7137 | 2.0490  | 0    | 47    | 0.0027  | 1    | R.DNQIVAMTETGDVK.Q <a href="#">4780</a> <a href="#">4781</a> <a href="#">4787</a> |
| <a href="#">6077</a>  | 824.7556 | 1647.4967 | 1644.8406 | 2.6561  | 1    | 9     | 19      | 1    | R.RSADTVPIPCNFIR.I                                                                |
| <a href="#">7393</a>  | 880.8021 | 1759.5897 | 1759.9468 | -0.3571 | 1    | 11    | 12      | 2    | R.ALVINDGGRELVDYK.V <a href="#">7387</a> <a href="#">7415</a>                     |
| <a href="#">8357</a>  | 618.3802 | 1852.1187 | 1850.0560 | 2.0627  | 0    | 13    | 7.7     | 1    | R.IGDILILQGRPCQVIR.I                                                              |
| <a href="#">13784</a> | 853.8102 | 2558.4087 | 2559.2618 | -0.8531 | 1    | (3)   | 65      | 2    | R.YQQDRFQQEKPYPEVHLAR.E <a href="#">13790</a>                                     |

168. [gi|220696373|gb|EED52715.1|](#) Mass: 15921 Score: 152 Queries matched: 23 emPAI: 0.79

40S ribosomal protein S11 [Aspergillus flavus NRRL3357]

| Query | Observed | Mr(expt) | Mr(calc) | Delta | Miss | Score | Expect | Rank | Peptide |
|-------|----------|----------|----------|-------|------|-------|--------|------|---------|
|-------|----------|----------|----------|-------|------|-------|--------|------|---------|

|                       |          |           |           |         |   |    |         |    |                                                                                       |
|-----------------------|----------|-----------|-----------|---------|---|----|---------|----|---------------------------------------------------------------------------------------|
| <a href="#">1118</a>  | 528.1031 | 1054.1917 | 1053.5567 | 0.6350  | 0 | 67 | 3.3e-05 | 1  | K.TPGPGAQSALR.A <a href="#">1119</a>                                                  |
| <a href="#">1399</a>  | 554.6956 | 1107.3767 | 1106.6448 | 0.7320  | 0 | 35 | 0.05    | 1  | K.ELGINALHIK.I <a href="#">1403</a> <a href="#">1419</a>                              |
| <a href="#">1637</a>  | 572.6926 | 1143.3707 | 1143.6434 | -0.2726 | 2 | 8  | 29      | 5  | -.MAPKQKTAATAK.E                                                                      |
| <a href="#">1718</a>  | 582.6501 | 1163.2857 | 1160.6336 | 2.6521  | 2 | 1  | 1.3e+02 | 9  | R.VTGGMKVKADR.D                                                                       |
| <a href="#">1912</a>  | 602.8091 | 1203.6037 | 1202.6666 | 0.9371  | 2 | 8  | 31      | 2  | R.ALARSGMRIGR.I <a href="#">1917</a>                                                  |
| <a href="#">3730</a>  | 709.6186 | 1417.2227 | 1416.6733 | 0.5495  | 0 | 58 | 0.00024 | 1  | R.IEDVTPTPSDSTR.R <a href="#">3733</a>                                                |
| <a href="#">4407</a>  | 748.2291 | 1494.4437 | 1493.7694 | 0.6743  | 2 | 6  | 40      | 7  | R.ETICRVTTGGMKVK.A                                                                    |
| <a href="#">8945</a>  | 639.1012 | 1914.2817 | 1912.0061 | 2.2756  | 2 | 6  | 36      | 2  | K.TPGPGAQSALRALARSGMR.I                                                               |
| <a href="#">9844</a>  | 676.1889 | 2025.5447 | 2024.9956 | 0.5491  | 0 | 20 | 1.2     | 1  | R.IFASFNDTFVHVTDLSGR.E <a href="#">9854</a> <a href="#">9855</a> <a href="#">9861</a> |
| <a href="#">11004</a> | 723.6425 | 2167.9057 | 2168.9830 | -1.0773 | 1 | 4  | 45      | 1  | R.DESSPYAAMLAAQDVAARCK.E <a href="#">11035</a>                                        |
| <a href="#">11158</a> | 730.9925 | 2189.9557 | 2190.0699 | -0.1142 | 2 | 3  | 67      | 10 | R.SGMRIGRIEDVTPTPSDSTR.R                                                              |
| <a href="#">11303</a> | 737.1152 | 2208.3237 | 2207.0276 | 1.2961  | 1 | 15 | 4.4     | 1  | K.ADDRESSPYAAMLAAQDVAAR.C <a href="#">11302</a>                                       |
| <a href="#">13435</a> | 837.9235 | 2510.7487 | 2511.1482 | -0.3995 | 2 | 3  | 60      | 1  | K.ADDRESSPYAAMLAAQDVAARCK.E                                                           |

169. [gi|220691267|gb|EED47615.1|](#) Mass: 10350 Score: 152 Queries matched: 5 emPAI: 0.34

60S ribosomal protein L37a [Aspergillus flavus NRRL3357]

| Query                | Observed | Mr(expt)  | Mr(calc)  | Delta   | Miss | Score | Expect  | Rank | Peptide                                    |
|----------------------|----------|-----------|-----------|---------|------|-------|---------|------|--------------------------------------------|
| <a href="#">1307</a> | 545.6311 | 1089.2477 | 1089.5277 | -0.2800 | 0    | 8     | 31      | 6    | R.QAVGIWECK.G                              |
| <a href="#">1639</a> | 572.7536 | 1143.4927 | 1142.5832 | 0.9095  | 1    | 6     | 46      | 10   | K.YGTRYGASLR.K                             |
| <a href="#">2402</a> | 425.1675 | 1272.4807 | 1270.6782 | 1.8025  | 2    | 9     | 20      | 8    | K.YGTRYGASLRK.Q                            |
| <a href="#">6300</a> | 833.2531 | 1664.4917 | 1663.8530 | 0.6388  | 0    | 102   | 9.9e-09 | 1    | K.TVAGGAYTVSTPAAATR.S <a href="#">6307</a> |

170. [gi|220690482|gb|EED46831.1|](#) Mass: 38935 Score: 151 Queries matched: 10 emPAI: 0.08

adenosine kinase, putative [Aspergillus flavus NRRL3357]

| Query                 | Observed  | Mr(expt)  | Mr(calc)  | Delta   | Miss | Score | Expect | Rank | Peptide                                                        |
|-----------------------|-----------|-----------|-----------|---------|------|-------|--------|------|----------------------------------------------------------------|
| <a href="#">1630</a>  | 1142.5190 | 1141.5117 | 1141.6203 | -0.1086 | 0    | 12    | 9.4    | 1    | K.LIAGGAAQNTAR.G                                               |
| <a href="#">2048</a>  | 614.7091  | 1227.4037 | 1226.6659 | 0.7378  | 0    | 6     | 43     | 1    | K.QPQIWSLVEK.A                                                 |
| <a href="#">10479</a> | 1048.2606 | 2094.5067 | 2094.0568 | 0.4499  | 0    | 94    | 6e-08  | 1    | R.GAQYILPDNSVLYIGCVGR.D <a href="#">10480</a>                  |
| <a href="#">10724</a> | 1066.2841 | 2130.5537 | 2131.0190 | -0.4653 | 1    | 5     | 43     | 3    | R.SMCTHLAAANEYKLEHLK.Q <a href="#">10723</a>                   |
| <a href="#">13527</a> | 841.7499  | 2522.2277 | 2520.4163 | 1.8114  | 0    | 4     | 51     | 3    | R.VAIVTQGTLPVAATVKPNGEVEVK.E <a href="#">13512</a>             |
| <a href="#">14093</a> | 873.8055  | 2618.3947 | 2618.2152 | 0.1795  | 1    | 2     | 79     | 2    | K.CGVIITGHNRS <del>M</del> CTHLAAANEYK.L <a href="#">14099</a> |

171. [gi|220700314|gb|EED56652.1|](#) Mass: 59238 Score: 151 Queries matched: 13 emPAI: 0.11

cyclopropane-fatty-acyl-phospholipid synthase, putative [Aspergillus flavus NRRL3357]

| Query                | Observed | Mr(expt)  | Mr(calc)  | Delta   | Miss | Score | Expect  | Rank | Peptide                              |
|----------------------|----------|-----------|-----------|---------|------|-------|---------|------|--------------------------------------|
| <a href="#">1310</a> | 545.6966 | 1089.3787 | 1089.5414 | -0.1627 | 1    | 10    | 19      | 7    | R.KAGIEDSQSR.I                       |
| <a href="#">3204</a> | 680.5581 | 1359.1017 | 1357.6851 | 1.4166  | 1    | 6     | 43      | 2    | R.NQTAWGNGLRK.A <a href="#">3201</a> |
| <a href="#">3344</a> | 686.7266 | 1371.4387 | 1369.6951 | 1.7436  | 1    | 4     | 70      | 3    | K.SKIPMEVFYK.Y <a href="#">3320</a>  |
| <a href="#">7790</a> | 896.7361 | 1791.4577 | 1791.9268 | -0.4691 | 0    | 1     | 1.1e+02 | 2    | K.YASVHYGAQVTGITLGR.N                |

|                       |          |           |           |         |   |    |         |   |                                                 |
|-----------------------|----------|-----------|-----------|---------|---|----|---------|---|-------------------------------------------------|
| <a href="#">8887</a>  | 636.6305 | 1906.8697 | 1906.9222 | -0.0525 | 0 | 8  | 22      | 2 | K.HFLFGFIPEMLMHTR.S                             |
| <a href="#">9040</a>  | 963.2351 | 1924.4557 | 1923.9731 | 0.4826  | 0 | 82 | 8.7e-07 | 1 | K.YIFPGADASTPLGFVVDL.L <a href="#">9051</a>     |
| <a href="#">10057</a> | 682.5445 | 2044.6117 | 2043.9506 | 0.6611  | 2 | 6  | 32      | 2 | R.IMCLDYRDAPRVGGYK.K                            |
| <a href="#">11038</a> | 724.9139 | 2171.7197 | 2170.1456 | 1.5741  | 0 | 52 | 0.00078 | 1 | K.IGLKPGDVLVDLGGWGTLLAK.Y <a href="#">11045</a> |
| <a href="#">11761</a> | 760.4992 | 2278.4757 | 2277.1246 | 1.3512  | 2 | 1  | 1.1e+02 | 5 | R.VDGGYKKITCLEMAEHVGV.R.H                       |

172. [gi|220689529|gb|EED45880.1|](#) Mass: 12588 Score: 149 Queries matched: 22 emPAI: 3.26

conserved hypothetical protein [Aspergillus flavus NRRL3357]

| Query                 | Observed  | Mr(expt)  | Mr(calc)  | Delta   | Miss | Score | Expect  | Rank | Peptide                                                                          |
|-----------------------|-----------|-----------|-----------|---------|------|-------|---------|------|----------------------------------------------------------------------------------|
| <a href="#">1179</a>  | 534.4891  | 1066.9637 | 1065.4913 | 1.4724  | 0    | 5     | 47      | 10   | K.QDFCIVER.Y                                                                     |
| <a href="#">1255</a>  | 541.1806  | 1080.3467 | 1079.5862 | 0.7605  | 0    | 57    | 0.00034 | 1    | K.LLEASAVYSK.D <a href="#">1249</a> <a href="#">1258</a>                         |
| <a href="#">1561</a>  | 567.0876  | 1132.1607 | 1132.6063 | -0.4456 | 0    | 10    | 18      | 8    | M.VYTIVVHMR.A                                                                    |
| <a href="#">2207</a>  | 625.5961  | 1249.1777 | 1248.5927 | 0.5850  | 0    | 31    | 0.12    | 1    | K.YHLENPYWK.T <a href="#">2202</a>                                               |
| <a href="#">2703</a>  | 653.4241  | 1304.8337 | 1304.6136 | 0.2201  | 0    | 22    | 1.1     | 1    | R.FEELVPEGEEK.K                                                                  |
| <a href="#">2866</a>  | 663.3161  | 1324.6177 | 1322.7081 | 1.9096  | 1    | 1     | 1.1e+02 | 1    | K.LLEASAVYSKDK.E                                                                 |
| <a href="#">3870</a>  | 478.6799  | 1433.0177 | 1432.7085 | 0.3092  | 1    | 22    | 0.91    | 1    | R.FEELVPEGEEKK.-                                                                 |
| <a href="#">3881</a>  | 718.7836  | 1435.5527 | 1433.7806 | 1.7721  | 0    | 40    | 0.017   | 1    | K.TFDPYVIPPLEK.D <a href="#">3877</a> <a href="#">3880</a>                       |
| <a href="#">4941</a>  | 776.2691  | 1550.5237 | 1551.8256 | -1.3019 | 1    | 3     | 80      | 6    | R.AKPDEESISKLHAK.L                                                               |
| <a href="#">5348</a>  | 795.6386  | 1589.2627 | 1588.8096 | 0.4531  | 2    | 46    | 0.0038  | 1    | R.RFEELVPEGEEKK.- <a href="#">5342</a> <a href="#">5347</a> <a href="#">5349</a> |
| <a href="#">10388</a> | 694.8075  | 2081.4007 | 2080.0551 | 1.3457  | 1    | 7     | 24      | 1    | K.TFDPYVIPPLEKMDLR.R                                                             |
| <a href="#">11382</a> | 739.8375  | 2216.4907 | 2217.1463 | -0.6556 | 1    | 13    | 6.7     | 2    | M.VYTIVVHMRAPKDEESISK.L <a href="#">11387</a>                                    |
| <a href="#">11494</a> | 1118.5306 | 2235.0467 | 2236.1562 | -1.1095 | 2    | 0     | 1.2e+02 | 2    | K.TFDPYVIPPLEKMDLRR.F                                                            |

173. [gi|220695409|gb|EED51752.1|](#) Mass: 15120 Score: 149 Queries matched: 8 emPAI: 0.84

ribosomal protein L26 [Aspergillus flavus NRRL3357]

| Query                 | Observed | Mr(expt)  | Mr(calc)  | Delta   | Miss | Score | Expect  | Rank | Peptide                              |
|-----------------------|----------|-----------|-----------|---------|------|-------|---------|------|--------------------------------------|
| <a href="#">213</a>   | 787.5430 | 786.5357  | 786.4235  | 0.1122  | 0    | 18    | 3.4     | 1    | R.EQILER.I                           |
| <a href="#">692</a>   | 481.2821 | 960.5497  | 960.5314  | 0.0183  | 0    | 36    | 0.055   | 1    | R.VIMSAPLSK.E                        |
| <a href="#">1223</a>  | 537.7881 | 1073.5617 | 1073.5717 | -0.0100 | 1    | 63    | 9.2e-05 | 1    | R.KDDEVTVIR.G <a href="#">1225</a>   |
| <a href="#">1898</a>  | 600.4766 | 1198.9387 | 1198.6054 | 0.3333  | 0    | 69    | 2.2e-05 | 1    | M.TVQNHSLASSR.R <a href="#">1897</a> |
| <a href="#">3757</a>  | 474.7729 | 1421.2967 | 1419.7470 | 1.5497  | 0    | 57    | 0.0003  | 1    | K.SNGQSVPLGIHPSK.V                   |
| <a href="#">10815</a> | 715.2842 | 2142.8307 | 2143.0956 | -0.2649 | 2    | 0     | 1.2e+02 | 9    | K.AHFNAGSGERRVIMSAPLSK.E             |

174. [gi|46370542|gb|AAS90074.1|](#) Mass: 44093 Score: 148 Queries matched: 12 emPAI: 0.07

NorA [Aspergillus flavus]

| Query                | Observed | Mr(expt)  | Mr(calc)  | Delta  | Miss | Score | Expect  | Rank | Peptide                                                   |
|----------------------|----------|-----------|-----------|--------|------|-------|---------|------|-----------------------------------------------------------|
| <a href="#">2134</a> | 621.6521 | 1241.2897 | 1240.5982 | 0.6915 | 2    | 9     | 19      | 3    | R.KMGPDQDEKHR.R <a href="#">2133</a> <a href="#">2138</a> |
| <a href="#">2660</a> | 650.7046 | 1299.3947 | 1298.6004 | 0.7944 | 1    | 6     | 40      | 2    | R.GQFRSAEDFSR.E <a href="#">2662</a>                      |
| <a href="#">7397</a> | 880.8521 | 1759.6897 | 1758.9920 | 0.6977 | 0    | 89    | 1.8e-07 | 1    | K.VLYLGVSDTPAWLVVK.C <a href="#">7399</a>                 |



[7980](#) 906.7636 1811.5127 1812.9469 -1.4341 0 7 26 4 K.ENIEALGLVLSEEEIR.E  
[8741](#) **631.6272** **1891.8597** **1891.0026** **0.8571** 0 6 37 2 -.MVLPTAPEPPTLLGYHR.I [8745](#) [8755](#)  
[11851](#) **1144.6306** **2287.2467** **2287.0799** **0.1668** 0 6 32 1 R.DILPMCESEGMGLAPWGLGR.G

**Proteins matching the same set of peptides:**

[gi|46370627|gb|AAS90094.1|](#) Mass: 44093 Score: 148 Queries matched: 12

NorA [Aspergillus flavus]

[gi|220694822|gb|EED51166.1|](#) Mass: 44093 Score: 148 Queries matched: 12

af1E/ norA/ aad/ adh-2/ NOR reductase/ dehydrogenase [Aspergillus flavus NRRL3357]

175. [gi|220699220|gb|EED55559.1|](#) Mass: 32741 Score: 148 Queries matched: 11 emPAI: 0.21

conserved hypothetical protein [Aspergillus flavus NRRL3357]

| Query                 | Observed         | Mr(expt)         | Mr(calc)         | Delta          | Miss     | Score      | Expect         | Rank     | Peptide                                                                        |
|-----------------------|------------------|------------------|------------------|----------------|----------|------------|----------------|----------|--------------------------------------------------------------------------------|
| <a href="#">2657</a>  | 650.5141         | 1299.0137        | 1298.7962        | 0.2175         | 0        | 31         | 0.12           | 2        | K.ALIPAVVNIVYK.K                                                               |
| <a href="#">2886</a>  | 664.4051         | 1326.7957        | 1325.7707        | 1.0250         | 0        | 6          | 42             | 6        | K.IIWIQNDLIAK.W <a href="#">2874</a>                                           |
| <a href="#">6248</a>  | <b>554.6955</b>  | <b>1661.0647</b> | <b>1662.7970</b> | <b>-1.7323</b> | <b>1</b> | <b>7</b>   | <b>32</b>      | <b>4</b> | <b>R.YLNKVGMMHAAQER.M</b>                                                      |
| <a href="#">6797</a>  | 851.3341         | 1700.6537        | 1698.7180        | 1.9357         | 0        | 2          | 1e+02          | 3        | K.ILGDSSSTSASSSDDDR.S                                                          |
| <a href="#">10103</a> | <b>683.9949</b>  | <b>2048.9627</b> | <b>2047.7986</b> | <b>1.1641</b>  | <b>0</b> | <b>3</b>   | <b>69</b>      | <b>7</b> | <b>R.DGEEYAEEMSQMTLDER.E</b>                                                   |
| <a href="#">11496</a> | 746.1379         | 2235.3917        | 2233.3674        | 2.0243         | 2        | 5          | 40             | 3        | K.VALVRAIGKIIWIQNDLIAK.W                                                       |
| <a href="#">12188</a> | 778.7612         | 2333.2617        | 2332.9787        | 0.2830         | 1        | 1          | 99             | 8        | R.IRDGEEYAEEMSQMTLDER.E                                                        |
| <a href="#">13794</a> | <b>1281.4516</b> | <b>2560.8887</b> | <b>2560.2333</b> | <b>0.6554</b>  | <b>0</b> | <b>108</b> | <b>1.6e-09</b> | <b>1</b> | <b>R.INYLQDFLDFNSADVEALTTGSK.Y</b> <a href="#">13803</a> <a href="#">13808</a> |

176. [gi|220696700|gb|EED53042.1|](#) Mass: 20770 Score: 146 Queries matched: 18 emPAI: 0.35

60S ribosomal protein L18 [Aspergillus flavus NRRL3357]

| Query                | Observed        | Mr(expt)         | Mr(calc)         | Delta          | Miss     | Score     | Expect         | Rank     | Peptide                                                                                  |
|----------------------|-----------------|------------------|------------------|----------------|----------|-----------|----------------|----------|------------------------------------------------------------------------------------------|
| <a href="#">49</a>   | <b>678.4570</b> | <b>677.4497</b>  | <b>677.3609</b>  | <b>0.0888</b>  | <b>1</b> | <b>22</b> | <b>1.2</b>     | <b>1</b> | <b>K.FERAR.G</b>                                                                         |
| <a href="#">55</a>   | 683.3920        | 682.3847         | 682.4377         | -0.0530        | 0        | 27        | 0.18           | 2        | R.LLNVPK.L <a href="#">56</a> <a href="#">57</a>                                         |
| <a href="#">70</a>   | 689.4530        | 688.4457         | 687.3551         | 1.0906         | 0        | 12        | 14             | 3        | M.GIDLDR.H                                                                               |
| <a href="#">1516</a> | <b>564.6586</b> | <b>1127.3027</b> | <b>1125.6506</b> | <b>1.6521</b>  | <b>0</b> | <b>52</b> | <b>0.0012</b>  | <b>1</b> | <b>R.APTGANTLLLR.G</b> <a href="#">1514</a>                                              |
| <a href="#">1602</a> | <b>569.9046</b> | <b>1137.7947</b> | <b>1137.6618</b> | <b>0.1329</b>  | <b>0</b> | <b>24</b> | <b>0.59</b>    | <b>1</b> | <b>R.INRPPVLSR.I</b> <a href="#">1605</a>                                                |
| <a href="#">2573</a> | 646.2231        | 1290.4317        | 1290.7183        | -0.2866        | 0        | 16        | 4.5            | 2        | K.SENVYLQVLVK.L <a href="#">2583</a>                                                     |
| <a href="#">3551</a> | 465.6792        | 1394.0157        | 1392.8816        | 1.1341         | 1        | 7         | 32             | 8        | R.LLNVPKLSVAALR.F                                                                        |
| <a href="#">4083</a> | <b>729.3076</b> | <b>1456.6007</b> | <b>1456.7885</b> | <b>-0.1878</b> | <b>0</b> | <b>78</b> | <b>2.6e-06</b> | <b>1</b> | <b>K.AGGETLTLDQLALR.A</b> <a href="#">4084</a> <a href="#">4103</a> <a href="#">4105</a> |
| <a href="#">5496</a> | 535.2075        | 1602.6007        | 1602.9318        | -0.3311        | 2        | 8         | 23             | 4        | K.LSVAALRFATARAR.I                                                                       |
| <a href="#">7583</a> | 888.3331        | 1774.6517        | 1771.9879        | 2.6638         | 1        | 2         | 88             | 8        | R.LFMSRINRPPVLSR.I                                                                       |

177. [gi|46370464|gb|AAS89999.1|](#) Mass: 232840 Score: 145 Queries matched: 44 emPAI: 0.04

PksA [Aspergillus flavus]

| Query | Observed | Mr(expt) | Mr(calc) | Delta | Miss | Score | Expect | Rank | Peptide |
|-------|----------|----------|----------|-------|------|-------|--------|------|---------|
|-------|----------|----------|----------|-------|------|-------|--------|------|---------|

|                       |                 |                  |                  |                |          |           |                |          |                                                                                         |
|-----------------------|-----------------|------------------|------------------|----------------|----------|-----------|----------------|----------|-----------------------------------------------------------------------------------------|
| <a href="#">24</a>    | 649.5510        | 648.5437         | 648.3265         | 0.2172         | 0        | 14        | 6.9            | 2        | R.QMVQK.Y <a href="#">25</a>                                                            |
| <a href="#">103</a>   | <b>717.4400</b> | <b>716.4327</b>  | <b>716.3566</b>  | <b>0.0762</b>  | <b>1</b> | <b>12</b> | <b>16</b>      | <b>6</b> | <b>R.DRVDGR.S</b>                                                                       |
| <a href="#">897</a>   | 501.7006        | 1001.3867        | 1000.6281        | 0.7586         | 1        | 17        | 3.9            | 4        | R.VVLQSTVKK.A <a href="#">889</a> <a href="#">890</a> <a href="#">895</a>               |
| <a href="#">1617</a>  | 571.2136        | 1140.4127        | 1140.5710        | -0.1582        | 0        | 7         | 29             | 6        | R.HTVDMAQALR.S                                                                          |
| <a href="#">2034</a>  | 613.7251        | 1225.4357        | 1223.6622        | 1.7735         | 2        | 9         | 19             | 2        | K.SLRRSVSEYK.T                                                                          |
| <a href="#">2335</a>  | <b>633.5566</b> | <b>1265.0987</b> | <b>1262.6407</b> | <b>2.4580</b>  | <b>1</b> | <b>11</b> | <b>14</b>      | <b>1</b> | <b>K.KYHAPFASSQK.V</b>                                                                  |
| <a href="#">2801</a>  | <b>659.2111</b> | <b>1316.4077</b> | <b>1315.7096</b> | <b>0.6982</b>  | <b>0</b> | <b>28</b> | <b>0.25</b>    | <b>1</b> | <b>K.NAITLSGSPSTLR.A</b>                                                                |
| <a href="#">3061</a>  | <b>673.1676</b> | <b>1344.3207</b> | <b>1341.6889</b> | <b>2.6319</b>  | <b>0</b> | <b>4</b>  | <b>77</b>      | <b>6</b> | <b>R.AGLVPDTPSTQR.D</b>                                                                 |
| <a href="#">3326</a>  | <b>686.1251</b> | <b>1370.2357</b> | <b>1370.6911</b> | <b>-0.4554</b> | <b>1</b> | <b>3</b>  | <b>84</b>      | <b>3</b> | <b>R.CQRGTHAMLAVK.A</b>                                                                 |
| <a href="#">3591</a>  | 700.4056        | 1398.7967        | 1397.8718        | 0.9249         | 2        | 1         | 1.3e+02        | 3        | R.GALRVVLQSTVKK.A                                                                       |
| <a href="#">3631</a>  | 702.6071        | 1403.1997        | 1403.6755        | -0.4758        | 1        | 0         | 1.5e+02        | 7        | K.SYEVYTKMGQAK.E                                                                        |
| <a href="#">4161</a>  | <b>489.5759</b> | <b>1465.7057</b> | <b>1463.6108</b> | <b>2.0949</b>  | <b>0</b> | <b>12</b> | <b>8.9</b>     | <b>1</b> | <b>R.AFCAMPEMAQHR.T <a href="#">4162</a></b>                                            |
| <a href="#">4167</a>  | 489.8612        | 1466.5617        | 1463.6094        | 2.9523         | 0        | 4         | 56             | 5        | R.MALMSTYEAMER.A                                                                        |
| <a href="#">4340</a>  | 496.4349        | 1486.2827        | 1486.8872        | -0.6044        | 1        | 4         | 57             | 9        | R.QVKSVTIVPFLTR.M                                                                       |
| <a href="#">4568</a>  | 759.2261        | 1516.4377        | 1517.6966        | -1.2589        | 0        | 4         | 64             | 3        | R.AQMLQSMNTVDHK.L                                                                       |
| <a href="#">6940</a>  | 856.5921        | 1711.1697        | 1709.8416        | 1.3282         | 0        | 1         | 1.1e+02        | 4        | R.TALVCLCQLGCFIR.E                                                                      |
| <a href="#">6960</a>  | <b>571.9085</b> | <b>1712.7037</b> | <b>1712.8767</b> | <b>-0.1730</b> | <b>1</b> | <b>9</b>  | <b>19</b>      | <b>1</b> | <b>K.EHVSIIISDLIDRVMA.-</b>                                                             |
| <a href="#">7086</a>  | 863.8401        | 1725.6657        | 1724.8774        | 0.7883         | 0        | 77        | 2.8e-06        | 1        | R.QLFLFGDQTADFVVK.L                                                                     |
| <a href="#">9218</a>  | 650.5109        | 1948.5107        | 1946.9594        | 1.5513         | 1        | 1         | 1.1e+02        | 8        | R.MPKVGIVWAAETVMDER.D                                                                   |
| <a href="#">9311</a>  | <b>981.1061</b> | <b>1960.1977</b> | <b>1958.9302</b> | <b>1.2675</b>  | <b>0</b> | <b>91</b> | <b>1.1e-07</b> | <b>1</b> | <b>R.FPESPTTESFWDLLYK.G <a href="#">9315</a></b>                                        |
| <a href="#">10554</a> | 702.6782        | 2105.0127        | 2102.0143        | 2.9984         | 0        | 5         | 45             | 4        | K.TLFMLPDGGGSAFSYASLPR.L                                                                |
| <a href="#">11640</a> | 753.8102        | 2258.4087        | 2256.2213        | 2.1874         | 0        | 2         | 72             | 7        | R.VVEETTKPLGATLVVETDISR.K                                                               |
| <a href="#">12378</a> | 790.7629        | 2369.2667        | 2370.2179        | -0.9512        | 0        | 1         | 88             | 4        | R.VLINNFSAAGNTALIVEDAPER.H <a href="#">12414</a>                                        |
| <a href="#">12438</a> | 792.6672        | 2374.9797        | 2374.1661        | 0.8136         | 2        | 3         | 56             | 2        | R.MPKVGIVWAAETVMDERDAPK.M                                                               |
| <a href="#">12660</a> | 803.8829        | 2408.6267        | 2408.1473        | 0.4794         | 0        | 2         | 72             | 5        | K.VLMMQHDTIPPHCGIKPGSK.I                                                                |
| <a href="#">12704</a> | 805.8019        | 2414.3837        | 2414.2158        | 0.1679         | 2        | 1         | 87             | 8        | R.AQMLQSMNTVDHKLARTADLR.Q                                                               |
| <a href="#">12981</a> | 818.7969        | 2453.3687        | 2454.3053        | -0.9366        | 2        | 3         | 61             | 2        | K.GPQLLRITLTM <del>EWPPKAAAT</del> TR.S                                                 |
| <a href="#">13112</a> | 824.2465        | 2469.7177        | 2469.3950        | 0.3227         | 1        | 2         | 73             | 7        | K.TLVIELGPKPLISGMVKMTLGEK.I                                                             |
| <a href="#">13132</a> | 824.8125        | 2471.4157        | 2469.3950        | 2.0207         | 1        | (0)       | 1.1e+02        | 8        | K.TLVIELGPKPLISGMVKMTLGEK.I                                                             |
| <a href="#">13664</a> | <b>847.8485</b> | <b>2540.5237</b> | <b>2540.0188</b> | <b>0.5049</b>  | <b>0</b> | <b>4</b>  | <b>47</b>      | <b>1</b> | <b>R.DPENMNC<del>THGAMIESFCNEIR</del>.R <a href="#">13667</a> <a href="#">13670</a></b> |
| <a href="#">13850</a> | 858.2382        | 2571.6927        | 2571.1225        | 0.5702         | 1        | (1)       | 93             | 3        | K.EAPQMDPAQRMALMSTYEAMER.A                                                              |
| <a href="#">13991</a> | <b>869.5172</b> | <b>2605.5297</b> | <b>2603.1124</b> | <b>2.4173</b>  | <b>1</b> | <b>7</b>  | <b>21</b>      | <b>1</b> | <b>K.EAPQMDPAQRMALMSTYEAMER.A</b>                                                       |
| <a href="#">14986</a> | 935.7805        | 2804.3197        | 2803.2827        | 1.0371         | 1        | 0         | 1e+02          | 10       | R.MALMSTYEAMERAGLVPDTPSTQR.D                                                            |
| <a href="#">16307</a> | 1142.4669       | 3424.3787        | 3421.8107        | 2.5681         | 2        | 2         | 53             | 5        | K.ENDLVHGDVVVL <del>DGEQVVAFFRGLSLRSVPR</del> .G                                        |
| <a href="#">16386</a> | 1157.8399       | 3470.4977        | 3470.6210        | -0.1233        | 2        | 1         | 67             | 9        | K.GMHFMIQKRTEFGPDGWDTIMPGASFDIVR.A                                                      |

178. [gi|1081987|gb|AAC41674.1|](#) Mass: 232793 Score: 145 Queries matched: 42 emPAI: 0.04

polyketide synthase

| Query              | Observed | Mr(expt) | Mr(calc) | Delta  | Miss | Score | Expect | Rank | Peptide                      |
|--------------------|----------|----------|----------|--------|------|-------|--------|------|------------------------------|
| <a href="#">24</a> | 649.5510 | 648.5437 | 648.3265 | 0.2172 | 0    | 14    | 6.9    | 2    | R.QMVQK.Y <a href="#">25</a> |

|                       |                  |                  |                  |                |          |           |                |          |                                                                               |
|-----------------------|------------------|------------------|------------------|----------------|----------|-----------|----------------|----------|-------------------------------------------------------------------------------|
| <a href="#">579</a>   | 459.7451         | 917.4757         | 915.4774         | 1.9983         | 0        | 2         | 1.3e+02        | 7        | R.TTNVPQTR.R                                                                  |
| <a href="#">937</a>   | <b>1015.6040</b> | <b>1014.5967</b> | <b>1014.6437</b> | <b>-0.0470</b> | <b>1</b> | <b>4</b>  | <b>81</b>      | <b>6</b> | <b>R.VVLQTTVKK.A</b>                                                          |
| <a href="#">1617</a>  | 571.2136         | 1140.4127        | 1140.5710        | -0.1582        | 0        | 7         | 29             | 6        | R.HTVDMAQALR.S                                                                |
| <a href="#">2034</a>  | 613.7251         | 1225.4357        | 1223.6622        | 1.7735         | 2        | 9         | 19             | 2        | K.SLRRSVSEYK.T                                                                |
| <a href="#">2335</a>  | <b>633.5566</b>  | <b>1265.0987</b> | <b>1262.6407</b> | <b>2.4580</b>  | <b>1</b> | <b>11</b> | <b>14</b>      | <b>1</b> | <b>K.KYHAPFASSQK.V</b>                                                        |
| <a href="#">2801</a>  | <b>659.2111</b>  | <b>1316.4077</b> | <b>1315.7096</b> | <b>0.6982</b>  | <b>0</b> | <b>28</b> | <b>0.25</b>    | <b>1</b> | <b>K.NAITLSGSPSTLR.A</b>                                                      |
| <a href="#">3061</a>  | 673.1676         | 1344.3207        | 1341.6889        | 2.6319         | 0        | 4         | 77             | 6        | R.AGLVPDTPSTQR.D                                                              |
| <a href="#">3316</a>  | <b>457.6419</b>  | <b>1369.9037</b> | <b>1368.7296</b> | <b>1.1741</b>  | <b>1</b> | <b>4</b>  | <b>64</b>      | <b>8</b> | <b>R.AIPASGRPGAGKCK.L</b>                                                     |
| <a href="#">3326</a>  | 686.1251         | 1370.2357        | 1370.6911        | -0.4554        | 1        | 3         | 84             | 3        | R.CQRGTHAMLAVK.A                                                              |
| <a href="#">4167</a>  | 489.8612         | 1466.5617        | 1463.6094        | 2.9523         | 0        | 4         | 56             | 5        | R.MALMSTYEAMER.A                                                              |
| <a href="#">4293</a>  | 494.3592         | 1480.0557        | 1479.7425        | 0.3132         | 1        | 1         | 1.1e+02        | 7        | R.AMTDNGIKCTLLK.L                                                             |
| <a href="#">4340</a>  | 496.4349         | 1486.2827        | 1486.8872        | -0.6044        | 1        | 4         | 57             | 9        | R.QVKSVTIVPFLTR.M                                                             |
| <a href="#">4568</a>  | 759.2261         | 1516.4377        | 1517.6966        | -1.2589        | 0        | 4         | 64             | 3        | R.AQMLQSMNTVDHK.L                                                             |
| <a href="#">5374</a>  | 531.7742         | 1592.3007        | 1593.8297        | -1.5290        | 0        | 7         | 30             | 4        | R.SSHIVALSAHVGASMK.T                                                          |
| <a href="#">6940</a>  | 856.5921         | 1711.1697        | 1709.8416        | 1.3282         | 0        | 1         | 1.1e+02        | 4        | R.TALVCLCQLGCFIR.E                                                            |
| <a href="#">6960</a>  | <b>571.9085</b>  | <b>1712.7037</b> | <b>1712.8767</b> | <b>-0.1730</b> | <b>1</b> | <b>9</b>  | <b>19</b>      | <b>1</b> | <b>K.EHVSIIISDLIDRVMA.-</b>                                                   |
| <a href="#">7075</a>  | 863.3661         | 1724.7177        | 1723.0468        | 1.6709         | 2        | 1         | 1.1e+02        | 7        | R.SVPRGALRVVLQTTVK.K                                                          |
| <a href="#">7086</a>  | <b>863.8401</b>  | <b>1725.6657</b> | <b>1724.8774</b> | <b>0.7883</b>  | <b>0</b> | <b>77</b> | <b>2.8e-06</b> | <b>1</b> | <b>R.QLFLFGDQTADFVVK.L</b>                                                    |
| <a href="#">7318</a>  | <b>876.3001</b>  | <b>1750.5857</b> | <b>1750.8863</b> | <b>-0.3006</b> | <b>2</b> | <b>0</b>  | <b>1.4e+02</b> | <b>5</b> | <b>R.RWDINTHVDPGSKAR.N</b>                                                    |
| <a href="#">9311</a>  | <b>981.1061</b>  | <b>1960.1977</b> | <b>1958.9302</b> | <b>1.2675</b>  | <b>0</b> | <b>91</b> | <b>1.1e-07</b> | <b>1</b> | <b>R.FPESPTTESFWDLLYK.G</b> <a href="#">9315</a>                              |
| <a href="#">10554</a> | 702.6782         | 2105.0127        | 2102.0143        | 2.9984         | 0        | 5         | 45             | 4        | K.TLFMLPDGGGSAFSYASLPR.L                                                      |
| <a href="#">10561</a> | <b>1054.1901</b> | <b>2106.3657</b> | <b>2105.0398</b> | <b>1.3259</b>  | <b>2</b> | <b>4</b>  | <b>51</b>      | <b>1</b> | <b>R.RMPKVGIVWAADTVMDER.D</b> <a href="#">10560</a>                           |
| <a href="#">11640</a> | 753.8102         | 2258.4087        | 2256.2213        | 2.1874         | 0        | 2         | 72             | 7        | R.VVEETTKPLGATLVVETDISR.K                                                     |
| <a href="#">11665</a> | <b>754.8075</b>  | <b>2261.4007</b> | <b>2260.1667</b> | <b>1.2340</b>  | <b>2</b> | <b>0</b>  | <b>1.2e+02</b> | <b>9</b> | <b>K.NVAEVQRAMTDNGIKCTLLK.L</b>                                               |
| <a href="#">12257</a> | <b>782.6335</b>  | <b>2344.8787</b> | <b>2344.1555</b> | <b>0.7232</b>  | <b>2</b> | <b>4</b>  | <b>50</b>      | <b>2</b> | <b>R.MPKVGIVWAADTVMDERDAPK.M</b>                                              |
| <a href="#">12378</a> | 790.7629         | 2369.2667        | 2370.2179        | -0.9512        | 0        | 1         | 88             | 4        | R.VLINNFSAAGNTALIVEDAPER.H <a href="#">12414</a>                              |
| <a href="#">12660</a> | 803.8829         | 2408.6267        | 2408.1473        | 0.4794         | 0        | 2         | 72             | 5        | K.VLMMMQHDTIPPHCGIKPGSK.I                                                     |
| <a href="#">12704</a> | 805.8019         | 2414.3837        | 2414.2158        | 0.1679         | 2        | 1         | 87             | 8        | R.AQMLQSMNTVDHKLARTADLR.Q                                                     |
| <a href="#">12981</a> | 818.7969         | 2453.3687        | 2454.3053        | -0.9366        | 2        | 3         | 61             | 2        | K.GPQLLRTTLTMEWPPKAAATTR.S                                                    |
| <a href="#">13664</a> | <b>847.8485</b>  | <b>2540.5237</b> | <b>2540.0188</b> | <b>0.5049</b>  | <b>0</b> | <b>4</b>  | <b>47</b>      | <b>1</b> | <b>R.DPENMNCETHGAMIESFCNEIR.R</b> <a href="#">13667</a> <a href="#">13670</a> |
| <a href="#">13850</a> | 858.2382         | 2571.6927        | 2571.1225        | 0.5702         | 1        | (1)       | 93             | 3        | K.EAPQMDPAQRMALMSTYEAMER.A                                                    |
| <a href="#">13991</a> | <b>869.5172</b>  | <b>2605.5297</b> | <b>2603.1124</b> | <b>2.4173</b>  | <b>1</b> | <b>7</b>  | <b>21</b>      | <b>1</b> | <b>K.EAPQMDPAQRMALMSTYEAMER.A</b>                                             |
| <a href="#">14698</a> | <b>909.2912</b>  | <b>2724.8517</b> | <b>2722.5091</b> | <b>2.3426</b>  | <b>2</b> | <b>1</b>  | <b>80</b>      | <b>3</b> | <b>K.MTLGDKISTLPTLAPNKAIWPSLQK.I</b>                                          |
| <a href="#">14986</a> | 935.7805         | 2804.3197        | 2803.2827        | 1.0371         | 1        | 0         | 1e+02          | 10       | R.MALMSTYEAMERAGLVPDTPSTQR.D                                                  |
| <a href="#">16386</a> | 1157.8399        | 3470.4977        | 3470.6210        | -0.1233        | 2        | 1         | 67             | 9        | K.GMHFMIQKRTEFGPDGWDITMPGASFDIRV.A                                            |

## Proteins matching the same set of peptides:

[gi|1081989|gb|AAC41675.1|](#) Mass: 232793 Score: 145 Queries matched: 42

polyketide synthase

[gi|1584702|prf|2123354A](#) Mass: 232793 Score: 145 Queries matched: 42

polyketide synthase

[gi|2492660|sp|Q12053.1|PKSL1\\_ASPPA](#) Mass: 232793 Score: 145 Queries matched: 42

RecName: Full=Aflatoxin biosynthesis polyketide synthase; Short=PKS

[gi|45477381|gb|AAS66004.1|](#) Mass: 232793 Score: 145 Queries matched: 42

polyketide synthase [Aspergillus parasiticus]

179. [gi|46370488|gb|AAS90022.1|](#) Mass: 233156 Score: 145 Queries matched: 43 empAI: 0.04

PksA [Aspergillus flavus]

| Query                 | Observed         | Mr(expt)         | Mr(calc)         | Delta         | Miss     | Score      | Expect         | Rank     | Peptide                                                                       |
|-----------------------|------------------|------------------|------------------|---------------|----------|------------|----------------|----------|-------------------------------------------------------------------------------|
| <a href="#">24</a>    | 649.5510         | 648.5437         | 648.3265         | 0.2172        | 0        | 14         | 6.9            | 2        | R.QMVQK.Y <a href="#">25</a>                                                  |
| <a href="#">937</a>   | 1015.6040        | 1014.5967        | 1014.6437        | -0.0470       | 1        | 4          | 81             | 6        | R.VVLQTTVKK.A                                                                 |
| <a href="#">1617</a>  | 571.2136         | 1140.4127        | 1140.5710        | -0.1582       | 0        | 7          | 29             | 6        | R.HTVDMAQALR.S                                                                |
| <a href="#">2034</a>  | 613.7251         | 1225.4357        | 1223.6622        | 1.7735        | 2        | 9          | 19             | 2        | K.SLRRSVSEYK.T                                                                |
| <a href="#">2801</a>  | <b>659.2111</b>  | <b>1316.4077</b> | <b>1315.7096</b> | <b>0.6982</b> | <b>0</b> | <b>28</b>  | <b>0.25</b>    | <b>1</b> | <b>K.NAITLSGSPSTLR.A</b>                                                      |
| <a href="#">3061</a>  | 673.1676         | 1344.3207        | 1341.6889        | 2.6319        | 0        | 4          | 77             | 6        | R.AGLVPDTPSTQR.D                                                              |
| <a href="#">3316</a>  | 457.6419         | 1369.9037        | 1368.7296        | 1.1741        | 1        | 4          | 64             | 8        | R.AIPASGRPGAGKCK.L                                                            |
| <a href="#">3326</a>  | 686.1251         | 1370.2357        | 1370.6911        | -0.4554       | 1        | 3          | 84             | 3        | R.CQRGTHAMLAVK.A                                                              |
| <a href="#">4167</a>  | 489.8612         | 1466.5617        | 1463.6094        | 2.9523        | 0        | 4          | 56             | 5        | R.MALMSTYEAMER.A                                                              |
| <a href="#">4293</a>  | 494.3592         | 1480.0557        | 1479.7425        | 0.3132        | 1        | 1          | 1.1e+02        | 7        | R.AMTDNGIKCTLLK.L                                                             |
| <a href="#">4340</a>  | 496.4349         | 1486.2827        | 1486.8872        | -0.6044       | 1        | 4          | 57             | 9        | R.QVKSVTIVPFLTR.M                                                             |
| <a href="#">4568</a>  | 759.2261         | 1516.4377        | 1517.6966        | -1.2589       | 0        | 4          | 64             | 3        | R.AQMLQSMNTVDHK.L                                                             |
| <a href="#">5374</a>  | 531.7742         | 1592.3007        | 1593.8297        | -1.5290       | 0        | 7          | 30             | 4        | R.SSHIVALSAHVGASMK.T                                                          |
| <a href="#">6940</a>  | 856.5921         | 1711.1697        | 1709.8416        | 1.3282        | 0        | 1          | 1.1e+02        | 4        | R.TALVCLCQLGCFIR.E                                                            |
| <a href="#">7075</a>  | 863.3661         | 1724.7177        | 1723.0468        | 1.6709        | 2        | 1          | 1.1e+02        | 7        | R.SVPRGALRVVLQTTVK.K                                                          |
| <a href="#">7086</a>  | <b>863.8401</b>  | <b>1725.6657</b> | <b>1724.8774</b> | <b>0.7883</b> | <b>0</b> | <b>77</b>  | <b>2.8e-06</b> | <b>1</b> | <b>R.QLFLFGDQTADFVVK.L</b>                                                    |
| <a href="#">7318</a>  | 876.3001         | 1750.5857        | 1750.8863        | -0.3006       | 2        | 0          | 1.4e+02        | 5        | R.RWDINTHVDPGKAR.N                                                            |
| <a href="#">9311</a>  | <b>981.1061</b>  | <b>1960.1977</b> | <b>1958.9302</b> | <b>1.2675</b> | <b>0</b> | <b>91</b>  | <b>1.1e-07</b> | <b>1</b> | <b>R.FPESPTTESFWDLLYK.G <a href="#">9315</a></b>                              |
| <a href="#">10554</a> | 702.6782         | 2105.0127        | 2102.0143        | 2.9984        | 0        | 5          | 45             | 4        | K.TLFMLPDGGGSAFSYASLPR.L                                                      |
| <a href="#">10561</a> | <b>1054.1901</b> | <b>2106.3657</b> | <b>2105.0398</b> | <b>1.3259</b> | <b>2</b> | <b>4</b>   | <b>51</b>      | <b>1</b> | <b>R.RMPKVGIVWAADTVMDER.D <a href="#">10560</a></b>                           |
| <a href="#">11665</a> | 754.8075         | 2261.4007        | 2260.1667        | 1.2340        | 2        | 0          | 1.2e+02        | 9        | K.NVAEVQRAMTDNGIKCTLLK.L                                                      |
| <a href="#">12257</a> | 782.6335         | 2344.8787        | 2344.1555        | 0.7232        | 2        | 4          | 50             | 2        | R.MPKVGIVWAADTVMDERDAPK.M                                                     |
| <a href="#">12378</a> | 790.7629         | 2369.2667        | 2370.2179        | -0.9512       | 0        | 1          | 88             | 4        | R.VLINNFSAAAGNTALIVEDAPER.H <a href="#">12414</a>                             |
| <a href="#">12660</a> | 803.8829         | 2408.6267        | 2408.1473        | 0.4794        | 0        | 2          | 72             | 5        | K.VLMMQHDITIPPHCGIKPGSK.I                                                     |
| <a href="#">12704</a> | 805.8019         | 2414.3837        | 2414.2158        | 0.1679        | 2        | 1          | 87             | 8        | R.AQMLQSMNTVDHKLARTADLR.Q                                                     |
| <a href="#">12883</a> | 813.2992         | 2436.8757        | 2437.3866        | -0.5108       | 1        | 1          | 89             | 5        | K.GLIDDKSLVIELGPKPLISGMVK.M                                                   |
| <a href="#">12919</a> | <b>815.2245</b>  | <b>2442.6517</b> | <b>2441.3637</b> | <b>1.2880</b> | <b>1</b> | <b>4</b>   | <b>46</b>      | <b>2</b> | <b>K.SLVIELGPKPLISGMVKMTLGDK.I <a href="#">12930</a></b>                      |
| <a href="#">12981</a> | 818.7969         | 2453.3687        | 2454.3053        | -0.9366       | 2        | 3          | 61             | 2        | K.GPQLLRRTTLMWPPKAAATTR.S                                                     |
| <a href="#">13004</a> | <b>820.5772</b>  | <b>2458.7097</b> | <b>2457.3586</b> | <b>1.3511</b> | <b>1</b> | <b>(2)</b> | <b>69</b>      | <b>6</b> | <b>K.SLVIELGPKPLISGMVKMTLGDK.I</b>                                            |
| <a href="#">13664</a> | <b>847.8485</b>  | <b>2540.5237</b> | <b>2540.0188</b> | <b>0.5049</b> | <b>0</b> | <b>4</b>   | <b>47</b>      | <b>1</b> | <b>R.DPENMNCETHGAMIESFCNEIR.R <a href="#">13667</a> <a href="#">13670</a></b> |
| <a href="#">13850</a> | 858.2382         | 2571.6927        | 2571.1225        | 0.5702        | 1        | (1)        | 93             | 3        | K.EAPQMDPAQRMALMSTYEAMER.A                                                    |
| <a href="#">13991</a> | <b>869.5172</b>  | <b>2605.5297</b> | <b>2603.1124</b> | <b>2.4173</b> | <b>1</b> | <b>7</b>   | <b>21</b>      | <b>1</b> | <b>K.EAPQMDPAQRMALMSTYEAMER.A</b>                                             |

|                       |                  |                  |                  |                |          |          |           |          |                                              |
|-----------------------|------------------|------------------|------------------|----------------|----------|----------|-----------|----------|----------------------------------------------|
| <a href="#">14698</a> | 909.2912         | 2724.8517        | 2722.5091        | 2.3426         | 2        | 1        | 80        | 3        | K.MTLGDKISTLPTLAPNKAIWPSLQK.I                |
| <a href="#">14986</a> | 935.7805         | 2804.3197        | 2803.2827        | 1.0371         | 1        | 0        | 1e+02     | 10       | R.MALMSTYEAMERAGLVPDTPSTQR.D                 |
| <a href="#">16152</a> | <b>1112.2992</b> | <b>3333.8757</b> | <b>3334.7198</b> | <b>-0.8440</b> | <b>0</b> | <b>2</b> | <b>52</b> | <b>2</b> | <b>R.ADVTVGHSLGEFAALYAAGVLSASDVVYLVGQR.A</b> |
| <a href="#">16386</a> | 1157.8399        | 3470.4977        | 3470.6210        | -0.1233        | 2        | 1        | 67        | 9        | K.GMHFMIQKRTEFGPDGWDTIMGASFDIRV.A            |

180. [gi|40054456|gb|AAR32704.2|](#) Mass: 233115 Score: 145 Queries matched: 37 empAI: 0.04

PksA [Aspergillus sp. L]

| Query                 | Observed         | Mr(expt)         | Mr(calc)         | Delta         | Miss     | Score     | Expect         | Rank     | Peptide                                                                       |
|-----------------------|------------------|------------------|------------------|---------------|----------|-----------|----------------|----------|-------------------------------------------------------------------------------|
| <a href="#">24</a>    | 649.5510         | 648.5437         | 648.3265         | 0.2172        | 0        | 14        | 6.9            | 2        | R.QMVQK.Y <a href="#">25</a>                                                  |
| <a href="#">937</a>   | 1015.6040        | 1014.5967        | 1014.6437        | -0.0470       | 1        | 4         | 81             | 6        | R.VVLQTTVKK.A                                                                 |
| <a href="#">1617</a>  | 571.2136         | 1140.4127        | 1140.5710        | -0.1582       | 0        | 7         | 29             | 6        | R.HTVDMAQALR.S                                                                |
| <a href="#">2034</a>  | 613.7251         | 1225.4357        | 1223.6622        | 1.7735        | 2        | 9         | 19             | 2        | K.SLRRSVSEYK.T                                                                |
| <a href="#">2801</a>  | <b>659.2111</b>  | <b>1316.4077</b> | <b>1315.7096</b> | <b>0.6982</b> | <b>0</b> | <b>28</b> | <b>0.25</b>    | <b>1</b> | <b>K.NAITLSGSPSTLR.A</b>                                                      |
| <a href="#">3061</a>  | 673.1676         | 1344.3207        | 1341.6889        | 2.6319        | 0        | 4         | 77             | 6        | R.AGLVPDTPSTQR.D                                                              |
| <a href="#">3316</a>  | 457.6419         | 1369.9037        | 1368.7296        | 1.1741        | 1        | 4         | 64             | 8        | R.AIPASGRPGAGKCK.L                                                            |
| <a href="#">3326</a>  | 686.1251         | 1370.2357        | 1370.6911        | -0.4554       | 1        | 3         | 84             | 3        | R.CQRGTHAMLAVK.A                                                              |
| <a href="#">4167</a>  | 489.8612         | 1466.5617        | 1463.6094        | 2.9523        | 0        | 4         | 56             | 5        | R.MALMSTYEAMER.A                                                              |
| <a href="#">4293</a>  | 494.3592         | 1480.0557        | 1479.7425        | 0.3132        | 1        | 1         | 1.1e+02        | 7        | R.AMTDNGIKCTLLK.L                                                             |
| <a href="#">4340</a>  | 496.4349         | 1486.2827        | 1486.8872        | -0.6044       | 1        | 4         | 57             | 9        | R.QVKSVTIVPFLTR.M                                                             |
| <a href="#">5374</a>  | 531.7742         | 1592.3007        | 1593.8297        | -1.5290       | 0        | 7         | 30             | 4        | R.SSHIVALSAHVGASMK.T                                                          |
| <a href="#">6940</a>  | 856.5921         | 1711.1697        | 1709.8416        | 1.3282        | 0        | 1         | 1.1e+02        | 4        | R.TALVCLCQLGCFIR.E                                                            |
| <a href="#">7075</a>  | 863.3661         | 1724.7177        | 1723.0468        | 1.6709        | 2        | 1         | 1.1e+02        | 7        | R.SVPRGALRVVLQTTVK.K                                                          |
| <a href="#">7086</a>  | <b>863.8401</b>  | <b>1725.6657</b> | <b>1724.8774</b> | <b>0.7883</b> | <b>0</b> | <b>77</b> | <b>2.8e-06</b> | <b>1</b> | <b>R.QLFLFGDQTADFVPK.L</b>                                                    |
| <a href="#">7318</a>  | 876.3001         | 1750.5857        | 1750.8863        | -0.3006       | 2        | 0         | 1.4e+02        | 5        | R.RWDINTHVDPGSKAR.N                                                           |
| <a href="#">8549</a>  | 937.4641         | 1872.9137        | 1871.9346        | 0.9792        | 1        | 2         | 88             | 4        | R.AQMLQSMNTIDHKLAR.T                                                          |
| <a href="#">9311</a>  | <b>981.1061</b>  | <b>1960.1977</b> | <b>1958.9302</b> | <b>1.2675</b> | <b>0</b> | <b>91</b> | <b>1.1e-07</b> | <b>1</b> | <b>R.FPESPTTESFWDLLYK.G <a href="#">9315</a></b>                              |
| <a href="#">10554</a> | 702.6782         | 2105.0127        | 2102.0143        | 2.9984        | 0        | 5         | 45             | 4        | K.TLFMLPDGGGSAFSYASLPR.L                                                      |
| <a href="#">10561</a> | <b>1054.1901</b> | <b>2106.3657</b> | <b>2105.0398</b> | <b>1.3259</b> | <b>2</b> | <b>4</b>  | <b>51</b>      | <b>1</b> | <b>R.RMPKVGIVWAADTVMDER.D <a href="#">10560</a></b>                           |
| <a href="#">11640</a> | 753.8102         | 2258.4087        | 2256.2213        | 2.1874        | 0        | 2         | 72             | 7        | R.VVEETTKPLGATLVVETDISR.K                                                     |
| <a href="#">11665</a> | 754.8075         | 2261.4007        | 2260.1667        | 1.2340        | 2        | 0         | 1.2e+02        | 9        | K.NVAEVQRAMTDNGIKCTLLK.L                                                      |
| <a href="#">12257</a> | 782.6335         | 2344.8787        | 2344.1555        | 0.7232        | 2        | 4         | 50             | 2        | R.MPKVGIVWAADTVMDERDAPK.M                                                     |
| <a href="#">12660</a> | 803.8829         | 2408.6267        | 2408.1473        | 0.4794        | 0        | 2         | 72             | 5        | K.VLMMQHDTIPPHCGIKPGSK.I                                                      |
| <a href="#">12981</a> | 818.7969         | 2453.3687        | 2454.3053        | -0.9366       | 2        | 3         | 61             | 2        | K.GPQLLRRTLTMEWPPKAAATTR.S                                                    |
| <a href="#">13664</a> | <b>847.8485</b>  | <b>2540.5237</b> | <b>2540.0188</b> | <b>0.5049</b> | <b>0</b> | <b>4</b>  | <b>47</b>      | <b>1</b> | <b>R.DPENMNCETHGAMIESFCNEIR.R <a href="#">13667</a> <a href="#">13670</a></b> |
| <a href="#">13850</a> | 858.2382         | 2571.6927        | 2571.1225        | 0.5702        | 1        | (1)       | 93             | 3        | K.EAPQMDPAQRMALMSTYEAMER.A                                                    |
| <a href="#">13991</a> | <b>869.5172</b>  | <b>2605.5297</b> | <b>2603.1124</b> | <b>2.4173</b> | <b>1</b> | <b>7</b>  | <b>21</b>      | <b>1</b> | <b>K.EAPQMDPAQRMALMSTYEAMER.A</b>                                             |
| <a href="#">14698</a> | 909.2912         | 2724.8517        | 2722.5091        | 2.3426        | 2        | 1         | 80             | 3        | K.MTLGDKISTLPTLAPNKAIWPSLQK.I                                                 |
| <a href="#">14986</a> | 935.7805         | 2804.3197        | 2803.2827        | 1.0371        | 1        | 0         | 1e+02          | 10       | R.MALMSTYEAMERAGLVPDTPSTQR.D                                                  |
| <a href="#">16152</a> | 1112.2992        | 3333.8757        | 3334.7198        | -0.8440       | 0        | 2         | 52             | 2        | R.ADVTVGHSLGEFAALYAAGVLSASDVVYLVGQR.A                                         |
| <a href="#">16386</a> | 1157.8399        | 3470.4977        | 3470.6210        | -0.1233       | 2        | 1         | 67             | 9        | K.GMHFMIQKRTEFGPDGWDTIMGASFDIRV.A                                             |

## Proteins matching the same set of peptides:

[gi|46370626|gb|AAS90093.1|](#) Mass: 233115 Score: 145 Queries matched: 37

PksA [Aspergillus flavus]

[gi|220694831|gb|EED51175.1|](#) Mass: 233116 Score: 145 Queries matched: 37

aflC / pksA / pksL1 / polyketide synthase [Aspergillus flavus NRRL3357]

181. [gi|220696379|gb|EED52721.1|](#) Mass: 55053 Score: 144 Queries matched: 16 emPAI: 0.12  
eukaryotic translation initiation factor 3 subunit EifC1, putative [Aspergillus flavus NRRL3357]

| Query                 | Observed  | Mr(expt)  | Mr(calc)  | Delta   | Miss | Score | Expect  | Rank | Peptide                                                    |
|-----------------------|-----------|-----------|-----------|---------|------|-------|---------|------|------------------------------------------------------------|
| <a href="#">1317</a>  | 546.5186  | 1091.0227 | 1090.5771 | 0.4456  | 0    | 33    | 0.097   | 1    | K.NTLYNPTIR.S                                              |
| <a href="#">1532</a>  | 565.3721  | 1128.7297 | 1127.5533 | 1.1765  | 0    | 9     | 21      | 2    | K.LYTTMDLQK.L <a href="#">1518</a> <a href="#">1522</a>    |
| <a href="#">2071</a>  | 616.7276  | 1231.4407 | 1230.6496 | 0.7911  | 0    | 24    | 0.7     | 1    | K.LAGFLEVEPEK.L <a href="#">2073</a>                       |
| <a href="#">3453</a>  | 692.6871  | 1383.3597 | 1381.7792 | 1.5806  | 0    | 1     | 1.2e+02 | 4    | K.MLGYFSIIGLLR.V                                           |
| <a href="#">4538</a>  | 756.7761  | 1511.5377 | 1511.7368 | -0.1991 | 1    | 1     | 1.2e+02 | 5    | K.NFQKGGNSYDAIAK.K                                         |
| <a href="#">9267</a>  | 652.1742  | 1953.5007 | 1952.0156 | 1.4851  | 0    | 49    | 0.0019  | 1    | R.LQHGGPEALPLFEELFR.S <a href="#">9255</a>                 |
| <a href="#">10837</a> | 716.0802  | 2145.2187 | 2143.0156 | 2.2031  | 1    | (1)   | 1.1e+02 | 3    | K.RGEDPMAFAGEYGSRPLYK.M                                    |
| <a href="#">10948</a> | 720.9349  | 2159.7827 | 2159.0106 | 0.7722  | 1    | 3     | 67      | 3    | K.RGEDPMAFAGEYGSRPLYK.M                                    |
| <a href="#">13093</a> | 823.6359  | 2467.8857 | 2468.0826 | -0.1968 | 0    | (0)   | 1.2e+02 | 4    | R.VMAAHFTTYYYYVGFSYMMMR.R                                  |
| <a href="#">13476</a> | 840.0769  | 2517.2087 | 2516.0673 | 1.1414  | 0    | 0     | 1.1e+02 | 2    | R.VMAAHFTTYYYYVGFSYMMMR.R                                  |
| <a href="#">16411</a> | 1166.6499 | 3496.9277 | 3495.7045 | 1.2232  | 0    | 62    | 4.8e-05 | 1    | R.WVEGGLLEGEFVAANDLDYALENDLIHVSETK.A <a href="#">16412</a> |

182. [gi|220692565|gb|EED48911.1|](#) Mass: 41921 Score: 143 Queries matched: 14 emPAI: 0.08  
actin Act1 [Aspergillus flavus NRRL3357]

| Query                 | Observed  | Mr(expt)  | Mr(calc)  | Delta   | Miss | Score | Expect  | Rank | Peptide                                                        |
|-----------------------|-----------|-----------|-----------|---------|------|-------|---------|------|----------------------------------------------------------------|
| <a href="#">5992</a>  | 548.5572  | 1642.6497 | 1643.7903 | -1.1406 | 1    | 1     | 1.3e+02 | 9    | K.QEYDESGPSIVHRK.C                                             |
| <a href="#">7775</a>  | 896.1461  | 1790.2777 | 1789.8846 | 0.3931  | 0    | 89    | 1.8e-07 | 1    | K.SYELPDGQVITIGNER.F <a href="#">7777</a> <a href="#">7799</a> |
| <a href="#">9166</a>  | 648.1062  | 1941.2967 | 1941.8118 | -0.5151 | 0    | 3     | 74      | 6    | - .MDETAIVIDNGSGMCK.A <a href="#">9183</a>                     |
| <a href="#">11357</a> | 738.7129  | 2213.1167 | 2214.0627 | -0.9460 | 0    | 2     | 77      | 2    | K.DLYGNIVMSGGSTLYPGIADR.L                                      |
| <a href="#">12522</a> | 796.8322  | 2387.4747 | 2385.1383 | 2.3364  | 1    | 2     | 80      | 5    | R.HHGIIIGMGQKDSYVGDEAQS.K.R                                    |
| <a href="#">14751</a> | 913.9399  | 2738.7977 | 2737.3282 | 1.4695  | 1    | 1     | 89      | 6    | K.RGVLSLHYPIEHGIVNNWDDMEK.I                                    |
| <a href="#">14841</a> | 923.4399  | 2767.2977 | 2768.2018 | -0.9041 | 1    | 1     | 93      | 10   | M.DETAIVIDNGSGMCKAGFAGDDAPR.A                                  |
| <a href="#">15686</a> | 1030.8272 | 3089.4597 | 3086.4801 | 2.9796  | 2    | 1     | 78      | 2    | K.CDVDVRKDLYGNIVMSGGSTLYPGIADR.L                               |
| <a href="#">16033</a> | 1095.3632 | 3283.0677 | 3282.6457 | 0.4220  | 0    | (2)   | 68      | 1    | K.MTQIMFETFNVPFVYSIQAVLSLYASGR.T                               |
| <a href="#">16094</a> | 1100.6199 | 3298.8377 | 3298.6406 | 0.1971  | 0    | 14    | 4       | 4    | K.MTQIMFETFNVPFVYSIQAVLSLYASGR.T                               |
| <a href="#">16095</a> | 1100.6592 | 3298.9557 | 3298.6406 | 0.3151  | 0    | (11)  | 8       | 3    | K.MTQIMFETFNVPFVYSIQAVLSLYASGR.T                               |

183. [gi|220692810|gb|EED49156.1|](#) Mass: 14839 Score: 141 Queries matched: 22 emPAI: 1.28



alkaline serine protease [Aspergillus flavus NRRL3357]

| Query                 | Observed        | Mr(expt)         | Mr(calc)         | Delta         | Miss | Score       | Expect         | Rank     | Peptide                                                                     |
|-----------------------|-----------------|------------------|------------------|---------------|------|-------------|----------------|----------|-----------------------------------------------------------------------------|
| <a href="#">52</a>    | 679.9980        | 678.9907         | 678.3231         | 0.6676        | 1    | 8           | 25             | 2        | - <a href="#">.MSGRGR.G</a>                                                 |
| <a href="#">480</a>   | <b>894.6300</b> | <b>893.6227</b>  | <b>892.4324</b>  | <b>1.1903</b> | 0    | 4           | 57             | 3        | <b>R.IASNSGVVM.-</b> <a href="#">477</a>                                    |
| <a href="#">746</a>   | <b>486.3901</b> | <b>970.7657</b>  | <b>970.4872</b>  | <b>0.2785</b> | 0    | <b>42</b>   | <b>0.012</b>   | <b>1</b> | <b>K.EAAELWPR.I</b> <a href="#">747</a>                                     |
| <a href="#">879</a>   | 500.5621        | 999.1097         | 997.6107         | 1.4991        | 1    | 12          | 10             | 7        | K.KVMPAVVVR.Q <a href="#">871</a>                                           |
| <a href="#">934</a>   | 507.6281        | 1013.2417        | 1013.6056        | -0.3639       | 1    | (2)         | 1e+02          | 9        | K.KVMPAVVVR.Q                                                               |
| <a href="#">1947</a>  | 606.3661        | 1210.7177        | 1208.5680        | 2.1497        | 2    | 11          | 13             | 5        | - <a href="#">.MSGRGRGSSGNK.L</a> <a href="#">1955</a> <a href="#">1957</a> |
| <a href="#">3524</a>  | 696.4766        | 1390.9387        | 1390.7932        | 0.1455        | 1    | 6           | 45             | 7        | R.NLYIISVKGTGAR.L                                                           |
| <a href="#">4113</a>  | <b>731.1471</b> | <b>1460.2797</b> | <b>1458.7575</b> | <b>1.5223</b> | 0    | <b>(28)</b> | <b>0.24</b>    | <b>1</b> | <b>R.LPAAGVGDMVMATVK.K</b>                                                  |
| <a href="#">4252</a>  | <b>738.7131</b> | <b>1475.4117</b> | <b>1474.7524</b> | <b>0.6593</b> | 0    | <b>(42)</b> | <b>0.0093</b>  | <b>1</b> | <b>R.LPAAGVGDMVMATVK.K</b>                                                  |
| <a href="#">4383</a>  | <b>746.7241</b> | <b>1491.4337</b> | <b>1490.7473</b> | <b>0.6864</b> | 0    | <b>47</b>   | <b>0.0029</b>  | <b>1</b> | <b>R.LPAAGVGDMVMATVK.K</b> <a href="#">4378</a> <a href="#">4394</a>        |
| <a href="#">5316</a>  | 794.7901        | 1587.5657        | 1586.8524        | 0.7133        | 1    | 3           | 73             | 4        | R.LPAAGVGDMVMATVKK.G                                                        |
| <a href="#">6158</a>  | 827.7191        | 1653.4237        | 1651.9344        | 1.4893        | 1    | 4           | 51             | 7        | K.VMPAVVVRQSKPWR.R                                                          |
| <a href="#">7654</a>  | <b>891.3261</b> | <b>1780.6377</b> | <b>1780.0294</b> | <b>0.6083</b> | 2    | <b>7</b>    | <b>31</b>      | <b>1</b> | <b>K.KVMPAVVVRQSKPWR.R</b>                                                  |
| <a href="#">11131</a> | 729.8965        | 2186.6677        | 2184.8843        | 1.7834        | 0    | 3           | 71             | 6        | K.MSLGLPCGAVMNCCDNSGAR.N                                                    |
| <a href="#">12084</a> | <b>773.4669</b> | <b>2317.3787</b> | <b>2316.2042</b> | <b>1.1745</b> | 2    | <b>1</b>    | <b>1.1e+02</b> | <b>9</b> | <b>K.GTGARLNRLPAAGVGDMVMATVK.K</b>                                          |

184. [gi|220693799|gb|EED50144.1|](#) Mass: 30406 Score: 141 Queries matched: 21 emPAI: 0.11

TIM-barrel enzyme family protein [Aspergillus flavus NRRL3357]

| Query                 | Observed        | Mr(expt)         | Mr(calc)         | Delta          | Miss | Score     | Expect         | Rank     | Peptide                                                                 |
|-----------------------|-----------------|------------------|------------------|----------------|------|-----------|----------------|----------|-------------------------------------------------------------------------|
| <a href="#">312</a>   | <b>837.1880</b> | <b>836.1807</b>  | <b>836.4280</b>  | <b>-0.2472</b> | 0    | <b>29</b> | <b>0.2</b>     | <b>1</b> | <b>K.DAEYVLK.R</b> <a href="#">313</a>                                  |
| <a href="#">2132</a>  | 621.4821        | 1240.9497        | 1239.7551        | 1.1947         | 0    | 8         | 25             | 2        | K.IIVGAGAGIGLTAK.F                                                      |
| <a href="#">2643</a>  | 649.7981        | 1297.5817        | 1296.6496        | 0.9321         | 1    | 5         | 49             | 5        | R.DMRTFLTEL.R                                                           |
| <a href="#">6871</a>  | 853.6666        | 1705.3187        | 1704.8392        | 0.4795         | 0    | 18        | 2.5            | 2        | R.LPVEMAIQENAEAFK.K                                                     |
| <a href="#">7363</a>  | <b>586.4675</b> | <b>1756.3807</b> | <b>1757.0451</b> | <b>-0.6644</b> | 1    | <b>2</b>  | <b>89</b>      | <b>8</b> | <b>K.IIVGAGAGIGLTAKFIEK.G</b> <a href="#">7380</a> <a href="#">7388</a> |
| <a href="#">8073</a>  | <b>607.2639</b> | <b>1818.7697</b> | <b>1816.9393</b> | <b>1.8305</b>  | 1    | <b>16</b> | <b>3.8</b>     | <b>1</b> | <b>R.LPVEMAIQENAEAFKK.L</b>                                             |
| <a href="#">8489</a>  | 623.0425        | 1866.1057        | 1867.0210        | -0.9153        | 2    | 2         | 78             | 7        | - <a href="#">.MPRPTTRQEVLDRLR.K</a>                                    |
| <a href="#">8568</a>  | <b>938.2771</b> | <b>1874.5397</b> | <b>1874.0302</b> | <b>0.5095</b>  | 0    | <b>86</b> | <b>3.5e-07</b> | <b>1</b> | <b>R.LGFIGVQNFPTVGLIDGK.F</b> <a href="#">8577</a> <a href="#">8587</a> |
| <a href="#">12409</a> | <b>791.5672</b> | <b>2371.6797</b> | <b>2370.2617</b> | <b>1.4181</b>  | 2    | <b>6</b>  | <b>32</b>      | <b>1</b> | <b>R.LPVEMAIQENAEAFKKLQVNV.-</b>                                        |
| <a href="#">12573</a> | 799.2449        | 2394.7127        | 2396.3250        | -1.6123        | 1    | 2         | 74             | 9        | R.DAVVKINPEIIVLCHGGPLAGPK.D                                             |
| <a href="#">12677</a> | <b>804.7449</b> | <b>2411.2127</b> | <b>2409.1158</b> | <b>2.0969</b>  | 0    | <b>3</b>  | <b>61</b>      | <b>1</b> | <b>R.IAHEMDLVTPYAFTVDEGER.M</b>                                         |
| <a href="#">13361</a> | 835.3485        | 2503.0237        | 2504.1424        | -1.1187        | 2    | 4         | 51             | 2        | K.FRQNLLETGMGYDREVE MIR.I                                               |
| <a href="#">14838</a> | 922.9215        | 2765.7427        | 2767.2945        | -1.5518        | 1    | 0         | 1.1e+02        | 10       | R.IAHEMDLVTPYAFTVDEGERMAR.A                                             |
| <a href="#">15164</a> | 953.9659        | 2858.8757        | 2858.5476        | 0.3281         | 2    | 2         | 72             | 6        | K.INPEIIVLCHGGPLAGPKDAEYVLKR.T                                          |
| <a href="#">15923</a> | 1073.1612       | 3216.4617        | 3214.7424        | 1.7193         | 2    | 1         | 78             | 3        | R.DAVVKINPEIIVLCHGGPLAGPKDAEYVLK.R <a href="#">15924</a>                |

185. [gi|220690459|gb|EED46808.1|](#) Mass: 34616 Score: 140 Queries matched: 14 emPAI: 0.44

succinyl-CoA synthetase alpha subunit, putative [Aspergillus flavus NRRL3357]

| Query                 | Observed  | Mr(expt)  | Mr(calc)  | Delta   | Miss | Score | Expect  | Rank | Peptide                                                  |
|-----------------------|-----------|-----------|-----------|---------|------|-------|---------|------|----------------------------------------------------------|
| <a href="#">868</a>   | 499.0586  | 996.1027  | 995.5440  | 0.5587  | 0    | 25    | 0.45    | 1    | K.VIFQGF <del>T</del> GK.Q                               |
| <a href="#">1355</a>  | 1099.9410 | 1098.9337 | 1099.5444 | -0.6107 | 0    | 3     | 89      | 2    | R.MGHAGAI <del>V</del> SGGK.G                            |
| <a href="#">2264</a>  | 629.7411  | 1257.4677 | 1255.6455 | 1.8222  | 1    | 2     | 1.1e+02 | 6    | R.RMGHAGAI <del>V</del> SGGK.G                           |
| <a href="#">2509</a>  | 428.7005  | 1283.0797 | 1283.7172 | -0.6375 | 1    | 12    | 8.9     | 2    | K.IGIMPGFI <del>H</del> KR.G                             |
| <a href="#">2884</a>  | 1327.7010 | 1326.6937 | 1326.7507 | -0.0570 | 0    | 4     | 73      | 4    | K.ISALEAAGVIVER.S                                        |
| <a href="#">3822</a>  | 715.7041  | 1429.3937 | 1429.8253 | -0.4315 | 2    | 6     | 36      | 2    | R.ITDILKTQNKTR.L                                         |
| <a href="#">5152</a>  | 787.1736  | 1572.3327 | 1572.8875 | -0.5548 | 1    | 5     | 53      | 5    | R.SPASLGKALLNEFVK.R <a href="#">5148</a>                 |
| <a href="#">5950</a>  | 547.4122  | 1639.2147 | 1638.8590 | 0.3557  | 0    | 38    | 0.026   | 1    | K.AGSTHLDRP <del>V</del> FANVR.D <a href="#">5960</a>    |
| <a href="#">6519</a>  | 841.3281  | 1680.6417 | 1679.8487 | 0.7930  | 0    | 45    | 0.0046  | 1    | R.LVGPNC <del>P</del> GIIAPGQCK.I                        |
| <a href="#">7210</a>  | 871.1876  | 1740.3607 | 1739.9458 | 0.4150  | 0    | 88    | 2.4e-07 | 1    | K.ETGATASAI <del>F</del> VPPPLAAK.G <a href="#">7204</a> |
| <a href="#">15291</a> | 975.9262  | 2924.7567 | 2923.5185 | 1.2382  | 2    | 4     | 42      | 4    | R.MGHAGAI <del>V</del> SGGKGGADSKISALEAAGVIVER.S         |

186. [gi|220694688|gb|EED51032.1|](#) Mass: 80166 Score: 139 Queries matched: 21 emPAI: 0.17

arginyl-tRNA synthetase [Aspergillus flavus NRRL3357]

| Query                 | Observed  | Mr(expt)  | Mr(calc)  | Delta   | Miss | Score | Expect  | Rank | Peptide                                                                                 |
|-----------------------|-----------|-----------|-----------|---------|------|-------|---------|------|-----------------------------------------------------------------------------------------|
| <a href="#">1821</a>  | 593.0581  | 1184.1017 | 1182.5815 | 1.5202  | 1    | 6     | 39      | 4    | K.ARMALYESAR.Q                                                                          |
| <a href="#">4353</a>  | 744.7526  | 1487.4907 | 1485.7609 | 1.7298  | 1    | 4     | 60      | 4    | K.ITELMGHKDLASR.C                                                                       |
| <a href="#">4537</a>  | 756.7096  | 1511.4047 | 1510.7337 | 0.6710  | 0    | 1     | 1.2e+02 | 10   | K.MTHTLSSSYEVLK.V <a href="#">4540</a>                                                  |
| <a href="#">5392</a>  | 798.1466  | 1594.2787 | 1593.8362 | 0.4425  | 1    | 0     | 1.4e+02 | 10   | K.LGAATGIDSEKIYTR.L                                                                     |
| <a href="#">5807</a>  | 814.4741  | 1626.9337 | 1624.8535 | 2.0803  | 0    | 26    | 0.37    | 1    | R.TLEPCTILQYLFK.M <a href="#">5787</a>                                                  |
| <a href="#">6429</a>  | 837.8026  | 1673.5907 | 1672.8607 | 0.7301  | 0    | 51    | 0.0012  | 1    | R.MLAQWPDVLLNTR.T                                                                       |
| <a href="#">7465</a>  | 883.6596  | 1765.3047 | 1764.8835 | 0.4212  | 0    | 70    | 1.5e-05 | 1    | K.FPNSFP <del>S</del> LN <del>P</del> VDIYR.E <a href="#">7431</a> <a href="#">7466</a> |
| <a href="#">10731</a> | 1066.4171 | 2130.8197 | 2129.1117 | 1.7080  | 2    | 0     | 1.3e+02 | 1    | K.AGVSEKSEGA <del>V</del> IVDFTKHGAK.K                                                  |
| <a href="#">11084</a> | 727.1609  | 2178.4607 | 2179.1170 | -0.6562 | 0    | 2     | 79      | 3    | K.MIYVVAM <del>Q</del> QDLHLAQLFK.I <a href="#">11083</a>                               |
| <a href="#">11924</a> | 767.2632  | 2298.7677 | 2297.2130 | 1.5547  | 0    | 1     | 1.1e+02 | 7    | R.STIIGGFLANLYTVMGWDVIK.M                                                               |
| <a href="#">12361</a> | 789.4542  | 2365.3407 | 2363.3464 | 1.9943  | 1    | 19    | 1.7     | 1    | R.LQWSSTLDKGDLLLPVPALGIK.G <a href="#">12356</a>                                        |
| <a href="#">13812</a> | 855.4999  | 2563.4777 | 2562.2754 | 1.2023  | 1    | 16    | 3       | 1    | K.QFGSEEALNKDPINHLFDVYVK.I                                                              |
| <a href="#">13876</a> | 859.8229  | 2576.4467 | 2577.3360 | -0.8893 | 2    | 1     | 85      | 4    | K.MTHTLSSSYEVLKVVGSEPELKK.A                                                             |
| <a href="#">14361</a> | 890.2732  | 2667.7977 | 2665.3136 | 2.4841  | 2    | 0     | 1.1e+02 | 4    | K.YRQTYARLNIDFDVYSGESQIK.N                                                              |
| <a href="#">15420</a> | 995.3139  | 2982.9197 | 2981.3998 | 1.5199  | 0    | 6     | 26      | 1    | K.YQQVENPEETADILGITSVMVQDMSGK.R                                                         |

187. [gi|220696155|gb|EED52497.1|](#) Mass: 26272 Score: 137 Queries matched: 25 emPAI: 1.05

60S ribosomal protein L17 [Aspergillus flavus NRRL3357]

| Query                | Observed | Mr(expt)  | Mr(calc)  | Delta   | Miss | Score | Expect | Rank | Peptide                                                                              |
|----------------------|----------|-----------|-----------|---------|------|-------|--------|------|--------------------------------------------------------------------------------------|
| <a href="#">297</a>  | 831.5010 | 830.4937  | 830.4320  | 0.0617  | 0    | 32    | 0.17   | 1    | K.LEAV <del>P</del> MR.R <a href="#">295</a> <a href="#">298</a> <a href="#">302</a> |
| <a href="#">387</a>  | 431.4556 | 860.8967  | 860.5371  | 0.3596  | 0    | 50    | 0.0021 | 1    | K.FLIDLLK.N <a href="#">386</a> <a href="#">388</a> <a href="#">390</a>              |
| <a href="#">946</a>  | 509.0671 | 1016.1197 | 1014.5710 | 1.5488  | 0    | 44    | 0.0068 | 1    | K.GLDTGNLVK.H <a href="#">937</a>                                                    |
| <a href="#">1013</a> | 517.7741 | 1033.5337 | 1033.5669 | -0.0331 | 0    | 53    | 0.001  | 1    | K.HIQVNQAPK.G                                                                        |
| <a href="#">1081</a> | 524.6341 | 1047.2537 | 1046.5396 | 0.7141  | 0    | 36    | 0.053  | 1    | R.YAAQDIPAAK.S <a href="#">1071</a> <a href="#">1079</a> <a href="#">1085</a>        |

|                       |                 |                  |                  |                |          |           |                |          |                                                  |
|-----------------------|-----------------|------------------|------------------|----------------|----------|-----------|----------------|----------|--------------------------------------------------|
| <a href="#">2104</a>  | <b>619.2881</b> | <b>1236.5617</b> | <b>1234.6557</b> | <b>1.9060</b>  | <b>0</b> | <b>57</b> | <b>0.00034</b> | <b>1</b> | <b>R.ALTFLDNVTNK.L</b> <a href="#">2117</a>      |
| <a href="#">3853</a>  | <b>716.6766</b> | <b>1431.3387</b> | <b>1431.7623</b> | <b>-0.4235</b> | <b>2</b> | <b>3</b>  | <b>73</b>      | <b>5</b> | <b>K.QFGVSKARWPEK.S</b>                          |
| <a href="#">4744</a>  | 767.4961        | 1532.9777        | 1534.8328        | -1.8551        | 2        | 2         | 98             | 4        | K.GPVAKEAHLSSRQR.G                               |
| <a href="#">8309</a>  | <b>924.7631</b> | <b>1847.5117</b> | <b>1845.9479</b> | <b>1.5638</b>  | <b>2</b> | <b>1</b>  | <b>1e+02</b>   | <b>7</b> | <b>K.NTRETAQAINGMKLQR.A</b> <a href="#">8320</a> |
| <a href="#">8883</a>  | 636.5309        | 1906.5707        | 1904.0592        | 2.5116         | 2        | 4         | 57             | 3        | R.TTTRLAISKFQRPTER.K                             |
| <a href="#">10091</a> | <b>683.6212</b> | <b>2047.8417</b> | <b>2047.0772</b> | <b>0.7645</b>  | <b>1</b> | <b>2</b>  | <b>77</b>      | <b>1</b> | <b>R.ALTFLDNVTNKLEAVPMR.R</b>                    |
| <a href="#">14860</a> | <b>924.6752</b> | <b>2771.0037</b> | <b>2771.5069</b> | <b>-0.5032</b> | <b>2</b> | <b>0</b>  | <b>1e+02</b>   | <b>2</b> | <b>K.FLIDLLKNAEANADTKGLDTGNLVVK.H</b>            |
| <a href="#">15968</a> | 1083.2042       | 3246.5907        | 3247.6118        | -1.0210        | 1        | 2         | 65             | 5        | R.AHGRINPYMTNPCHIELILTEGEEVVK.G                  |

188. [gi|220688980|gb|EED45332.1|](#) Mass: 41120 Score: 137 Queries matched: 11 emPAI: 0.26

acetyl-CoA acetyltransferase, putative [Aspergillus flavus NRRL3357]

| Query                 | Observed        | Mr(expt)         | Mr(calc)         | Delta          | Miss     | Score     | Expect         | Rank     | Peptide                                                     |
|-----------------------|-----------------|------------------|------------------|----------------|----------|-----------|----------------|----------|-------------------------------------------------------------|
| <a href="#">1203</a>  | <b>536.2056</b> | <b>1070.3967</b> | <b>1069.7111</b> | <b>0.6856</b>  | <b>0</b> | <b>57</b> | <b>0.00034</b> | <b>1</b> | <b>R.ILTTLLGVLK.A</b> <a href="#">1202</a>                  |
| <a href="#">1536</a>  | <b>565.6751</b> | <b>1129.3357</b> | <b>1128.6543</b> | <b>0.6814</b>  | <b>0</b> | <b>44</b> | <b>0.0077</b>  | <b>1</b> | <b>K.FTTAPALAIPK.A</b> <a href="#">1535</a>                 |
| <a href="#">2233</a>  | 627.6711        | 1253.3277        | 1251.7914        | 1.5363         | 1        | 7         | 32             | 3        | K.LKELNLKPVAK.I <a href="#">2228</a>                        |
| <a href="#">3311</a>  | <b>685.6541</b> | <b>1369.2937</b> | <b>1369.6990</b> | <b>-0.4053</b> | <b>0</b> | <b>20</b> | <b>1.6</b>     | <b>1</b> | <b>K.ILGWGDAQQPSK.F</b>                                     |
| <a href="#">10504</a> | 700.4442        | 2098.3107        | 2097.0048        | 1.3059         | 1        | 0         | 1.3e+02        | 8        | K.YGNQSLVDGIMKDGLTDAGK.Q                                    |
| <a href="#">11295</a> | <b>736.7005</b> | <b>2207.0797</b> | <b>2204.9579</b> | <b>2.1218</b>  | <b>0</b> | <b>1</b>  | <b>99</b>      | <b>8</b> | <b>K.QELMGLQAECAQDHGFSR.E</b>                               |
| <a href="#">15335</a> | <b>982.5389</b> | <b>2944.5947</b> | <b>2942.4886</b> | <b>2.1061</b>  | <b>0</b> | <b>49</b> | <b>0.0012</b>  | <b>1</b> | <b>K.ADGIKPSDIQEVFFGNVISANVGQNP.R</b> <a href="#">15331</a> |

189. [gi|220691506|gb|EED47854.1|](#) Mass: 17947 Score: 136 Queries matched: 17 emPAI: 1.36

cytochrome c oxidase subunit Va, putative [Aspergillus flavus NRRL3357]

| Query                 | Observed         | Mr(expt)         | Mr(calc)         | Delta          | Miss     | Score     | Expect         | Rank     | Peptide                                                                                                                                     |
|-----------------------|------------------|------------------|------------------|----------------|----------|-----------|----------------|----------|---------------------------------------------------------------------------------------------------------------------------------------------|
| <a href="#">461</a>   | <b>443.6371</b>  | <b>885.2597</b>  | <b>884.5080</b>  | <b>0.7518</b>  | <b>0</b> | <b>15</b> | <b>5.7</b>     | <b>1</b> | <b>R.QELGVALR.E</b>                                                                                                                         |
| <a href="#">959</a>   | <b>510.3016</b>  | <b>1018.5887</b> | <b>1017.5244</b> | <b>1.0644</b>  | <b>0</b> | <b>47</b> | <b>0.0035</b>  | <b>1</b> | <b>R.VNDFPTAVR.V</b> <a href="#">956</a> <a href="#">958</a> <a href="#">960</a>                                                            |
| <a href="#">1768</a>  | <b>587.8771</b>  | <b>1173.7397</b> | <b>1173.6255</b> | <b>0.1143</b>  | <b>1</b> | <b>51</b> | <b>0.0013</b>  | <b>1</b> | <b>R.RVNDPPTAVR.V</b>                                                                                                                       |
| <a href="#">1860</a>  | <b>596.6006</b>  | <b>1191.1867</b> | <b>1190.6295</b> | <b>0.5572</b>  | <b>0</b> | <b>39</b> | <b>0.02</b>    | <b>1</b> | <b>K.QYLEALEGLR.Q</b> <a href="#">1859</a>                                                                                                  |
| <a href="#">5251</a>  | <b>791.9456</b>  | <b>1581.8767</b> | <b>1580.7471</b> | <b>1.1296</b>  | <b>0</b> | <b>2</b>  | <b>93</b>      | <b>3</b> | <b>K.EFDGVQDVFELQR.N</b>                                                                                                                    |
| <a href="#">13039</a> | <b>1232.9066</b> | <b>2463.7987</b> | <b>2464.2420</b> | <b>-0.4433</b> | <b>0</b> | <b>57</b> | <b>0.00026</b> | <b>1</b> | <b>R.NLNNCFAYDLVPSVEVLSAALR.A</b> <a href="#">13044</a> <a href="#">13050</a> <a href="#">13051</a> <a href="#">13054</a> <a href="#">1</a> |
| <a href="#">15465</a> | 1002.4339        | 3004.2797        | 3002.5349        | 1.7449         | 2        | 1         | 79             | 8        | K.QYLEALEGLRQELGVALREELYPGEQ.-                                                                                                              |

190. [gi|220691647|gb|EED47995.1|](#) Mass: 84150 Score: 136 Queries matched: 27 emPAI: 0.08

glutamyl-tRNA synthetase [Aspergillus flavus NRRL3357]

| Query                | Observed        | Mr(expt)         | Mr(calc)         | Delta         | Miss     | Score     | Expect     | Rank     | Peptide                                                     |
|----------------------|-----------------|------------------|------------------|---------------|----------|-----------|------------|----------|-------------------------------------------------------------|
| <a href="#">593</a>  | <b>463.5481</b> | <b>925.0817</b>  | <b>924.5392</b>  | <b>0.5425</b> | <b>0</b> | <b>16</b> | <b>3.2</b> | <b>2</b> | <b>K.ALDPLLQR.L</b> <a href="#">592</a> <a href="#">594</a> |
| <a href="#">1487</a> | 561.6826        | 1121.3507        | 1120.5665        | 0.7842        | 0        | 22        | 1          | 2        | R.SVQIWFAR.M <a href="#">1484</a>                           |
| <a href="#">2064</a> | <b>410.7815</b> | <b>1229.3227</b> | <b>1228.6663</b> | <b>0.6564</b> | <b>0</b> | <b>8</b>  | <b>24</b>  | <b>9</b> | <b>R.QIVTDPSSGVVK.E</b>                                     |
| <a href="#">2403</a> | 637.2901        | 1272.5657        | 1272.6422        | -0.0765       | 1        | 9         | 21         | 5        | R.RDATVEENLAR.F <a href="#">2411</a>                        |
| <a href="#">4511</a> | 754.6671        | 1507.3197        | 1505.7337        | 1.5861        | 0        | 7         | 30         | 6        | R.NPQYQWMLDALK.L                                            |

|                       |                  |                  |                  |                |          |             |                |          |                                                         |
|-----------------------|------------------|------------------|------------------|----------------|----------|-------------|----------------|----------|---------------------------------------------------------|
| <a href="#">5028</a>  | 520.6872         | 1559.0397        | 1557.8086        | 1.2312         | 2        | 13          | 8.3            | 4        | K.KGSPEGLGWCIRAK.I                                      |
| <a href="#">5093</a>  | 523.2355         | 1566.6847        | 1565.7178        | 0.9670         | 1        | 7           | 27             | 5        | K.ETMAAQRMDGLPSK.R                                      |
| <a href="#">6094</a>  | 550.6922         | 1649.0547        | 1648.8362        | 0.2186         | 0        | 2           | 87             | 10       | R.FPPEPSGYLHIGHAK.A                                     |
| <a href="#">6837</a>  | 852.2501         | 1702.4857        | 1701.8335        | 0.6522         | 1        | 8           | 25             | 2        | R.DPVIYRSNPDPHHR.T <a href="#">6850</a>                 |
| <a href="#">7290</a>  | 874.0151         | 1746.0157        | 1744.8115        | 1.2042         | 0        | 6           | 37             | 3        | K.DTLQEDDALEDVLR.N                                      |
| <a href="#">7606</a>  | <b>889.3576</b>  | <b>1776.7007</b> | <b>1776.8617</b> | <b>-0.1610</b> | <b>1</b> | <b>1</b>    | <b>1.2e+02</b> | <b>5</b> | <b>R.DRNPQYQWMLDALK.L</b>                               |
| <a href="#">7806</a>  | <b>897.6361</b>  | <b>1793.2577</b> | <b>1791.9559</b> | <b>1.3018</b>  | <b>0</b> | <b>76</b>   | <b>3.7e-06</b> | <b>1</b> | <b>K.AYAPGQPAVLFIPTGK.T <a href="#">7799</a></b>        |
| <a href="#">7879</a>  | 601.4069         | 1801.1987        | 1801.9363        | -0.7375        | 0        | 1           | 1.2e+02        | 8        | K.NITNLDWTLIWATNK.K                                     |
| <a href="#">10890</a> | 717.5639         | 2149.6697        | 2148.0595        | 1.6102         | 0        | 9           | 17             | 5        | R.IFTSGFGGIMSNMQLTLATK.A                                |
| <a href="#">13024</a> | <b>821.6115</b>  | <b>2461.8127</b> | <b>2461.2046</b> | <b>0.6081</b>  | <b>0</b> | <b>33</b>   | <b>0.064</b>   | <b>1</b> | <b>K.ENSEFQDAIVEDLALMGIKPKD.M <a href="#">13025</a></b> |
| <a href="#">13185</a> | <b>827.0302</b>  | <b>2478.0687</b> | <b>2477.1995</b> | <b>0.8692</b>  | <b>0</b> | <b>(18)</b> | <b>2</b>       | <b>1</b> | <b>K.ENSEFQDAIVEDLALMGIKPKD.M</b>                       |
| <a href="#">13529</a> | 841.7582         | 2522.2527        | 2522.1595        | 0.0933         | 1        | 3           | 60             | 4        | R.EDATADCNVAELKEGDIIQFER.K <a href="#">13517</a>        |
| <a href="#">15714</a> | <b>1033.7039</b> | <b>3098.0897</b> | <b>3099.7233</b> | <b>-1.6336</b> | <b>1</b> | <b>3</b>    | <b>48</b>      | <b>2</b> | <b>R.LNTHLLRSFIVGYSLSTADIALWGALR.G</b>                  |
| <a href="#">15746</a> | <b>1039.7125</b> | <b>3116.1157</b> | <b>3114.5656</b> | <b>1.5502</b>  | <b>1</b> | <b>1</b>    | <b>79</b>      | <b>3</b> | <b>K.QDEEITLMNWGNAIVRQIVTDPSSGVVK.E</b>                 |

191. [gi|220690361|gb|EED46711.1|](#) Mass: 16817 Score: 135 Queries matched: 16 emPAI: 0.73

60S ribosomal protein L27a, putative [Aspergillus flavus NRRL3357]

| Query                | Observed        | Mr(expt)         | Mr(calc)         | Delta          | Miss     | Score     | Expect        | Rank     | Peptide                                                                             |
|----------------------|-----------------|------------------|------------------|----------------|----------|-----------|---------------|----------|-------------------------------------------------------------------------------------|
| <a href="#">728</a>  | <b>968.4610</b> | <b>967.4537</b>  | <b>967.4552</b>  | <b>-0.0015</b> | <b>0</b> | <b>21</b> | <b>1</b>      | <b>1</b> | <b>K.YHPGYFGK.V <a href="#">729</a></b>                                             |
| <a href="#">1022</a> | <b>518.5736</b> | <b>1035.1327</b> | <b>1034.6488</b> | <b>0.4839</b>  | <b>0</b> | <b>44</b> | <b>0.0064</b> | <b>1</b> | <b>R.IPEIPIVVR.A <a href="#">1023</a> <a href="#">1029</a></b>                      |
| <a href="#">1893</a> | 600.2491        | 1198.4837        | 1197.6506        | 0.8331         | 0        | 22        | 0.92          | 1        | K.LWSLVPAEQR.D <a href="#">1891</a>                                                 |
| <a href="#">2211</a> | <b>625.8146</b> | <b>1249.6147</b> | <b>1247.7714</b> | <b>1.8433</b>  | <b>1</b> | <b>9</b>  | <b>20</b>     | <b>1</b> | <b>K.GRIPEIPIVVR.A</b>                                                              |
| <a href="#">6840</a> | 852.3106        | 1702.6067        | 1701.9189        | 0.6878         | 0        | 74        | 5.8e-06       | 1        | K.TDTAPVIDLLPLGYSK.V <a href="#">6817</a> <a href="#">6856</a> <a href="#">6857</a> |
| <a href="#">7126</a> | <b>866.7141</b> | <b>1731.4137</b> | <b>1729.9151</b> | <b>1.4986</b>  | <b>0</b> | <b>37</b> | <b>0.03</b>   | <b>1</b> | <b>K.TNQQFWKPVINLDK.L <a href="#">7135</a></b>                                      |
| <a href="#">7149</a> | <b>579.7989</b> | <b>1736.3747</b> | <b>1734.8346</b> | <b>1.5401</b>  | <b>2</b> | <b>8</b>  | <b>22</b>     | <b>1</b> | <b>R.KHPGGRGMAGGQHHR.T <a href="#">7156</a></b>                                     |

192. [gi|220692165|gb|EED48512.1|](#) Mass: 59020 Score: 135 Queries matched: 9 emPAI: 0.06

N-acetylglucosamine-phosphate mutase [Aspergillus flavus NRRL3357]

| Query                 | Observed        | Mr(expt)         | Mr(calc)         | Delta          | Miss     | Score     | Expect         | Rank     | Peptide                                         |
|-----------------------|-----------------|------------------|------------------|----------------|----------|-----------|----------------|----------|-------------------------------------------------|
| <a href="#">1578</a>  | <b>568.1801</b> | <b>1134.3457</b> | <b>1135.6536</b> | <b>-1.3078</b> | <b>2</b> | <b>7</b>  | <b>36</b>      | <b>2</b> | <b>K.LAKAFKGVMR.G</b>                           |
| <a href="#">1783</a>  | 588.8671        | 1175.7197        | 1174.6016        | 1.1181         | 0        | 8         | 27             | 5        | K.LPSVCTNTGVK.H <a href="#">1773</a>            |
| <a href="#">3640</a>  | <b>703.1851</b> | <b>1404.3557</b> | <b>1403.8024</b> | <b>0.5533</b>  | <b>0</b> | <b>87</b> | <b>3.1e-07</b> | <b>1</b> | <b>R.IATLAAAFIGDLTK.N <a href="#">3642</a></b>  |
| <a href="#">11101</a> | 728.0915        | 2181.2527        | 2183.1732        | -1.9205        | 2        | 2         | 75             | 10       | K.GSLTVDCANGVGGPKLRELLK.Y <a href="#">11119</a> |
| <a href="#">12475</a> | <b>794.7512</b> | <b>2381.2317</b> | <b>2381.2842</b> | <b>-0.0525</b> | <b>1</b> | <b>0</b>  | <b>1.1e+02</b> | <b>3</b> | <b>K.IGIIQTAYANGASTEYIEKVLK.L</b>               |
| <a href="#">15396</a> | 991.6642        | 2971.9707        | 2973.5559        | -1.5852        | 1        | 2         | 65             | 4        | K.NAGIAQHLKIGIIQTAYANGASTEYIEK.V                |

193. [gi|220689407|gb|EED45758.1|](#) Mass: 32431 Score: 134 Queries matched: 11 emPAI: 0.10

iron-sulfur protein subunit of succinate dehydrogenase Sdh2, putative [Aspergillus flavus NRRL3357]

| Query | Observed | Mr(expt) | Mr(calc) | Delta | Miss | Score | Expect | Rank | Peptide |
|-------|----------|----------|----------|-------|------|-------|--------|------|---------|
|-------|----------|----------|----------|-------|------|-------|--------|------|---------|

|                       |                 |                  |                  |               |          |            |                |           |                                      |
|-----------------------|-----------------|------------------|------------------|---------------|----------|------------|----------------|-----------|--------------------------------------|
| <a href="#">910</a>   | 503.0931        | 1004.1717        | 1003.5814        | 0.5903        | 0        | 20         | 2              | 2         | K.SIKPYLQR.E <a href="#">909</a>     |
| <a href="#">1977</a>  | 608.2726        | 1214.5307        | 1213.5649        | 0.9659        | 0        | 11         | 13             | 6         | K.MQSYSLDLNK.T                       |
| <a href="#">1990</a>  | <b>609.3751</b> | <b>1216.7357</b> | <b>1216.6308</b> | <b>0.1049</b> | <b>0</b> | <b>87</b>  | <b>3.6e-07</b> | <b>1</b>  | K.TGPMMLDALIR.I <a href="#">1993</a> |
| <a href="#">2130</a>  | 621.0376        | 1240.0607        | 1238.5601        | 1.5006        | 0        | 0          | 1.4e+02        | 10        | K.NEMDPTLTFR.R                       |
| <a href="#">3001</a>  | 669.9466        | 1337.8787        | 1337.6867        | 0.1920        | 0        | 17         |                | 3         | K.DLVPDLTQFYK.Q                      |
| <a href="#">3013</a>  | 670.7451        | 1339.4757        | 1338.6568        | 0.8189        | 0        | 14         |                | 6.5       | R.WNPDQPTKPK.M                       |
| <a href="#">12581</a> | <b>799.7552</b> | <b>2396.2437</b> | <b>2396.1902</b> | <b>0.0536</b> | <b>1</b> | <b>2</b>   |                | <b>72</b> | <b>K.MQSYSLDLNKTGPMMLDALIR.I</b>     |
| <a href="#">14265</a> | 886.3062        | 2655.8967        | 2653.3641        | 2.5326        | 2        | 1          |                | 92        | K.MQSYSLDLNKTGPMMLDALIRIK.N          |
| <a href="#">14385</a> | <b>891.0189</b> | <b>2670.0347</b> | <b>2669.3590</b> | <b>0.6757</b> | <b>2</b> | <b>(1)</b> |                | <b>97</b> | <b>K.MQSYSLDLNKTGPMMLDALIRIK.N</b>   |

194. [gi|220690101|gb|EED46451.1|](#) Mass: 18033 Score: 134 Queries matched: 18 emPAI: 0.99

60S ribosomal protein L21, putative [Aspergillus flavus NRRL3357]

| Query                 | Observed         | Mr(expt)         | Mr(calc)         | Delta          | Miss     | Score     | Expect        | Rank      | Peptide                                                                          |
|-----------------------|------------------|------------------|------------------|----------------|----------|-----------|---------------|-----------|----------------------------------------------------------------------------------|
| <a href="#">18</a>    | <b>643.4760</b>  | <b>642.4687</b>  | <b>642.3125</b>  | <b>0.1562</b>  | <b>0</b> | <b>15</b> | <b>6.1</b>    | <b>1</b>  | <b>R.YAFSR.N <a href="#">17</a></b>                                              |
| <a href="#">344</a>   | 848.1560         | 847.1487         | 845.4606         | 1.6881         | 2        | 9         | 28            | 4         | K.ENAEKKK.Q                                                                      |
| <a href="#">381</a>   | 430.1201         | 858.2257         | 857.4858         | 0.7399         | 0        | 56        | 0.00049       | 1         | R.VGDIVDIK.V <a href="#">372</a> <a href="#">378</a> <a href="#">379</a>         |
| <a href="#">791</a>   | <b>490.7336</b>  | <b>979.4527</b>  | <b>979.5339</b>  | <b>-0.0811</b> | <b>0</b> | <b>50</b> | <b>0.0016</b> | <b>1</b>  | <b>K.TGVVYNVTK.S <a href="#">790</a> <a href="#">792</a> <a href="#">793</a></b> |
| <a href="#">2573</a>  | 646.2231         | 1290.4317        | 1290.6754        | -0.2437        | 1        | 8         |               | 27        | K.VNGAVQKGMPLYK.V <a href="#">2597</a>                                           |
| <a href="#">2745</a>  | <b>437.5432</b>  | <b>1309.6077</b> | <b>1310.6262</b> | <b>-1.0185</b> | <b>1</b> | <b>8</b>  |               | <b>25</b> | <b>-.MGHSHGLRSGR.Y <a href="#">2760</a></b>                                      |
| <a href="#">3237</a>  | <b>681.7041</b>  | <b>1361.3937</b> | <b>1358.7194</b> | <b>2.6743</b>  | <b>0</b> | <b>24</b> | <b>0.6</b>    | <b>1</b>  | <b>K.EHQIALSTYLK.T</b>                                                           |
| <a href="#">12435</a> | <b>1188.4106</b> | <b>2374.8067</b> | <b>2372.2012</b> | <b>2.6055</b>  | <b>0</b> | <b>36</b> | <b>0.028</b>  | <b>1</b>  | <b>R.EAHVVQAAAPETITPIPYDTHI.- <a href="#">12436</a></b>                          |

195. [gi|220701844|gb|EED58182.1|](#) Mass: 77569 Score: 133 Queries matched: 26 emPAI: 0.13

glycerol-3-phosphate dehydrogenase, mitochondrial [Aspergillus flavus NRRL3357]

| Query                 | Observed         | Mr(expt)         | Mr(calc)         | Delta         | Miss     | Score     | Expect         | Rank     | Peptide                                                    |
|-----------------------|------------------|------------------|------------------|---------------|----------|-----------|----------------|----------|------------------------------------------------------------|
| <a href="#">168</a>   | 761.5690         | 760.5617         | 760.4079         | 0.1538        | 0        | 7         | 46             | 4        | K.SSEALVR.N <a href="#">166</a>                            |
| <a href="#">290</a>   | 415.0976         | 828.1807         | 827.5229         | 0.6579        | 1        | 10        | 17             | 6        | K.LVKEALR.E <a href="#">289</a>                            |
| <a href="#">1015</a>  | 518.1371         | 1034.2597        | 1032.5426        | 1.7171        | 0        | 4         | 78             | 9        | K.AIDAFPMLR.K                                              |
| <a href="#">1907</a>  | <b>1203.2690</b> | <b>1202.2617</b> | <b>1200.6211</b> | <b>1.6406</b> | <b>1</b> | <b>7</b>  | <b>35</b>      | <b>1</b> | <b>K.DASGNLNGARVK.D</b>                                    |
| <a href="#">2905</a>  | 664.8541         | 1327.6937        | 1327.7459        | -0.0522       | 2        | 18        | 2.6            | 3        | R.DPKVKSSEALVR.N <a href="#">2904</a> <a href="#">2939</a> |
| <a href="#">3810</a>  | 715.0836         | 1428.1527        | 1427.6721        | 0.4806        | 0        | 18        | 2.4            | 2        | K.AVWELDYNQYK.L <a href="#">3806</a>                       |
| <a href="#">4199</a>  | 736.7006         | 1471.3867        | 1470.7579        | 0.6288        | 0        | 0         | 1.4e+02        | 3        | R.AWQVAALSSPTNAR.F                                         |
| <a href="#">4288</a>  | <b>740.6916</b>  | <b>1479.3687</b> | <b>1478.7769</b> | <b>0.5918</b> | <b>0</b> | <b>60</b> | <b>0.00017</b> | <b>1</b> | <b>R.ISALYPFIDGEVR.Y</b>                                   |
| <a href="#">6997</a>  | 859.1726         | 1716.3307        | 1715.9682        | 0.3625        | 2        | 2         |                | 87       | K.NFLGLSRAQVEAGKVK.Q                                       |
| <a href="#">7487</a>  | 884.8016         | 1767.5887        | 1767.9195        | -0.3308       | 1        | 1         | 1.1e+02        | 6        | K.AVWELDYNQYKLVK.E                                         |
| <a href="#">10190</a> | 687.2395         | 2058.6967        | 2059.8364        | -1.1397       | 0        | 3         |                | 62       | 10 K.DNMIGAMVYYDGAHNDSR.M                                  |
| <a href="#">10280</a> | 690.1012         | 2067.2817        | 2068.0187        | -0.7370       | 1        | 2         |                | 80       | K.DLEWKESVSFLSSMGLPK.N                                     |
| <a href="#">10528</a> | 701.3305         | 2100.9697        | 2101.0804        | -0.1106       | 2        | 1         | 1e+02          | 8        | K.DIIPGKNGQEEGEFTIRAK.G                                    |
| <a href="#">11044</a> | <b>1087.1871</b> | <b>2172.3597</b> | <b>2171.9364</b> | <b>0.4233</b> | <b>1</b> | <b>3</b>  | <b>76</b>      | <b>1</b> | <b>R.KDNMIGAMVYYDGAHNDSR.M <a href="#">11046</a></b>       |

|                       |                  |                  |                  |               |          |           |                |          |                                                                   |
|-----------------------|------------------|------------------|------------------|---------------|----------|-----------|----------------|----------|-------------------------------------------------------------------|
| <a href="#">15193</a> | 957.7472         | 2870.2197        | 2868.4184        | 1.8013        | 0        | 3         | 50             | 3        | R.MNVS LAMTAALYGSTVVNHMQVTGLTK.D                                  |
| <a href="#">16286</a> | <b>1140.0059</b> | <b>3416.9957</b> | <b>3415.6606</b> | <b>1.3351</b> | <b>0</b> | <b>41</b> | <b>0.0071</b>  | <b>1</b> | <b>K.EIVAPSSGVHVLPGYYSPSDMGLIDPSTSDGR.V</b> <a href="#">16287</a> |
| <a href="#">16308</a> | <b>1142.5852</b> | <b>3424.7337</b> | <b>3421.7782</b> | <b>2.9555</b> | <b>2</b> | <b>2</b>  | <b>58</b>      | <b>9</b> | <b>R.ISALYPPFIDGEVRYAVRHEYAQTAVDVIAR.R</b>                        |
| <a href="#">16345</a> | <b>1149.8212</b> | <b>3446.4417</b> | <b>3444.7089</b> | <b>1.7328</b> | <b>0</b> | <b>51</b> | <b>0.00072</b> | <b>1</b> | <b>R.VIFFLPWQGNITAGTTDQPTEITTTQPEPSEK.D</b> <a href="#">16346</a> |

196. [gi|220699161|gb|EED55500.1|](#) Mass: 52977 Score: 133 Queries matched: 19 emPAI: 0.13

phosphatidyl synthase [Aspergillus flavus NRRL3357]

| Query                 | Observed         | Mr(expt)         | Mr(calc)         | Delta          | Miss     | Score     | Expect         | Rank     | Peptide                                               |
|-----------------------|------------------|------------------|------------------|----------------|----------|-----------|----------------|----------|-------------------------------------------------------|
| <a href="#">83</a>    | 702.3110         | 701.3037         | 700.4595         | 0.8442         | 1        | 9         | 25             | 3        | K.LLTRAK.D                                            |
| <a href="#">98</a>    | 716.2790         | 715.2717         | 715.4228         | -0.1511        | 1        | 12        | 13             | 4        | K.EKVAAAK.N                                           |
| <a href="#">335</a>   | 845.5400         | 844.5327         | 842.4610         | 2.0717         | 1        | 8         | 38             | 3        | R.AKDPVASR.I <a href="#">334</a>                      |
| <a href="#">755</a>   | <b>487.7086</b>  | <b>973.4027</b>  | <b>972.5240</b>  | <b>0.8787</b>  | <b>0</b> | <b>30</b> | <b>0.18</b>    | <b>1</b> | <b>K.ALTGVDLER.V</b>                                  |
| <a href="#">2539</a>  | <b>644.1606</b>  | <b>1286.3067</b> | <b>1287.5943</b> | <b>-1.2876</b> | <b>0</b> | <b>0</b>  | <b>1.5e+02</b> | <b>7</b> | <b>K.VNPVTGGDSGSAVE.-</b>                             |
| <a href="#">3385</a>  | 688.6166         | 1375.2187        | 1374.7103        | 0.5084         | 0        | 6         | 45             | 10       | R.LASVVTADGNSVSR.D <a href="#">3381</a>               |
| <a href="#">4699</a>  | <b>510.3019</b>  | <b>1527.8837</b> | <b>1527.7755</b> | <b>0.1082</b>  | <b>1</b> | <b>6</b>  | <b>39</b>      | <b>8</b> | <b>K.MKFDAILVFADSR.D</b>                              |
| <a href="#">6993</a>  | <b>858.9216</b>  | <b>1715.8287</b> | <b>1716.9119</b> | <b>-1.0831</b> | <b>1</b> | <b>2</b>  | <b>86</b>      | <b>2</b> | <b>R.VSRLASVVTADGNSVSR.D</b>                          |
| <a href="#">7996</a>  | 605.0849         | 1812.2327        | 1812.8643        | -0.6315        | 1        | 9         | 17             | 4        | K.WNPKNPVTGGDSGSAVE.-                                 |
| <a href="#">8157</a>  | <b>915.1171</b>  | <b>1828.2197</b> | <b>1827.9704</b> | <b>0.2494</b>  | <b>2</b> | <b>13</b> | <b>7.2</b>     | <b>1</b> | <b>R.GSRNSFGTSLPIPRSPR.V</b>                          |
| <a href="#">8518</a>  | 624.2215         | 1869.6427        | 1870.0173        | -0.3746        | 2        | 7         | 26             | 2        | R.NSFGTSLPIPRSPRVSR.L                                 |
| <a href="#">8883</a>  | 636.5309         | 1906.5707        | 1905.0207        | 1.5500         | 1        | 2         | 80             | 6        | R.ISIEAQYKALTGVDLER.V                                 |
| <a href="#">12472</a> | <b>794.7049</b>  | <b>2381.0927</b> | <b>2381.1838</b> | <b>-0.0911</b> | <b>0</b> | <b>88</b> | <b>1.9e-07</b> | <b>1</b> | <b>R.IPIYFSQGDLMPTDHOQPPR.L</b> <a href="#">12495</a> |
| <a href="#">15352</a> | <b>984.7752</b>  | <b>2951.3037</b> | <b>2948.3941</b> | <b>2.9096</b>  | <b>0</b> | <b>10</b> | <b>12</b>      | <b>1</b> | <b>R.TGVFQGGDNENNPANFGVFPNVLEAVK.A</b>                |
| <a href="#">15510</a> | 1011.9422        | 3032.8047        | 3032.5561        | 0.2487         | 2        | 6         | 26             | 2        | R.VSRLASVVTADGNSVSRDLLASVQVQDMSK.E                    |
| <a href="#">16254</a> | <b>1130.4842</b> | <b>3388.4307</b> | <b>3386.6956</b> | <b>1.7352</b>  | <b>1</b> | <b>1</b>  | <b>69</b>      | <b>2</b> | <b>K.FDAILVFADSRDYATDMQLILDLLLAEDGK.L</b>             |

197. [gi|220695611|gb|EED51954.1|](#) Mass: 28707 Score: 133 Queries matched: 8 emPAI: 0.12

AI-BP family protein [Aspergillus flavus NRRL3357]

| Query                 | Observed         | Mr(expt)         | Mr(calc)         | Delta         | Miss     | Score     | Expect         | Rank     | Peptide                                                                     |
|-----------------------|------------------|------------------|------------------|---------------|----------|-----------|----------------|----------|-----------------------------------------------------------------------------|
| <a href="#">1160</a>  | 532.6081         | 1063.2017        | 1062.5822        | 0.6196        | 1        | 7         | 35             | 7        | K.NELYQRLK.T                                                                |
| <a href="#">1786</a>  | <b>589.1716</b>  | <b>1176.3287</b> | <b>1174.6611</b> | <b>1.6676</b> | <b>1</b> | <b>5</b>  | <b>50</b>      | <b>1</b> | <b>R.HFLGGRFLTK.S</b>                                                       |
| <a href="#">2597</a>  | 647.6176         | 1293.2207        | 1291.7282        | 1.4926        | 2        | (2)       | 1.1e+02        | 6        | R.TARMSLKAISSK.D                                                            |
| <a href="#">2744</a>  | <b>437.5199</b>  | <b>1309.5377</b> | <b>1307.7231</b> | <b>1.8146</b> | <b>2</b> | <b>3</b>  | <b>70</b>      | <b>4</b> | <b>R.TARMSLKAISSK.D</b>                                                     |
| <a href="#">9718</a>  | <b>670.9919</b>  | <b>2009.9537</b> | <b>2009.0366</b> | <b>0.9172</b> | <b>0</b> | <b>2</b>  | <b>87</b>      | <b>1</b> | <b>K.FMPEYLISLTAPKPCVK.Y</b>                                                |
| <a href="#">10629</a> | <b>1059.8606</b> | <b>2117.7067</b> | <b>2117.1409</b> | <b>0.5659</b> | <b>0</b> | <b>82</b> | <b>8.5e-07</b> | <b>1</b> | <b>K.TQLDNLSVVPFITDFPVAIK.S</b> <a href="#">10636</a> <a href="#">10644</a> |

198. [gi|220700980|gb|EED57318.1|](#) Mass: 86258 Score: 133 Queries matched: 17 emPAI: 0.12

protein transport protein Sec23, putative [Aspergillus flavus NRRL3357]

| Query              | Observed | Mr(expt) | Mr(calc) | Delta   | Miss | Score | Expect | Rank | Peptide    |
|--------------------|----------|----------|----------|---------|------|-------|--------|------|------------|
| <a href="#">19</a> | 646.3760 | 645.3687 | 645.3810 | -0.0123 | 0    | 14    | 9.7    | 2    | R.VTTVAR.N |



|                       |                  |                  |                  |                |   |           |                |          |                                                                                         |
|-----------------------|------------------|------------------|------------------|----------------|---|-----------|----------------|----------|-----------------------------------------------------------------------------------------|
| <a href="#">1868</a>  | 597.6356         | 1193.2567        | 1193.5829        | -0.3262        | 0 | 3         | 71             | 3        | R.LSWNTFPSSR.M                                                                          |
| <a href="#">1942</a>  | 605.6591         | 1209.3037        | 1206.5881        | 2.7157         | 1 | 5         | 43             | 6        | K.DDPTSFRLEK.N <a href="#">1940</a>                                                     |
| <a href="#">2714</a>  | 654.2921         | 1306.5697        | 1307.7561        | -1.1864        | 0 | 4         | 60             | 3        | K.VTGLIGHAVSLNK.K                                                                       |
| <a href="#">2942</a>  | <b>666.5516</b>  | <b>1331.0887</b> | <b>1329.7041</b> | <b>1.3846</b>  | 0 | <b>43</b> | <b>0.0084</b>  | <b>1</b> | <b>R.AVLNPYANVDVR.A <a href="#">2940</a></b>                                            |
| <a href="#">3327</a>  | <b>686.1911</b>  | <b>1370.3677</b> | <b>1368.8381</b> | <b>1.5296</b>  | 0 | <b>55</b> | <b>0.00056</b> | <b>1</b> | <b>R.LVVPIGAVYTPLK.D <a href="#">3304</a> <a href="#">3320</a> <a href="#">3333</a></b> |
| <a href="#">6941</a>  | 571.4265         | 1711.2577        | 1712.8497        | -1.5920        | 0 | 5         | 43             | 5        | K.NFTLYPQFMFHLR.R                                                                       |
| <a href="#">7909</a>  | 902.8496         | 1803.6847        | 1802.8700        | 0.8148         | 2 | 0         | 1.3e+02        | 4        | R.SHHDIDRDNIKYYK.K                                                                      |
| <a href="#">14129</a> | <b>877.7735</b>  | <b>2630.2987</b> | <b>2629.2806</b> | <b>1.0181</b>  | 0 | <b>40</b> | <b>0.011</b>   | <b>1</b> | <b>R.NLSGPAGDPTLAQSFDQEAAAVLMAR.I</b>                                                   |
| <a href="#">14378</a> | 890.8152         | 2669.4237        | 2668.3418        | 1.0819         | 1 | 3         | 58             | 3        | R.IFDKDANDNLLMGFNASLEVLTK.E                                                             |
| <a href="#">16084</a> | <b>1099.1385</b> | <b>3294.3937</b> | <b>3294.7441</b> | <b>-0.3504</b> | 0 | <b>9</b>  | <b>11</b>      | <b>1</b> | <b>K.QVQEMLGLLSAGVRPNMPQQPARPPLGPAAR.F <a href="#">16085</a></b>                        |

199. [gi|220699918|gb|EED56257.1|](#) Mass: 45222 Score: 133 Queries matched: 14 emPAI: 0.15

pyruvate dehydrogenase, putative [Aspergillus flavus NRRL3357]

| Query                 | Observed        | Mr(expt)         | Mr(calc)         | Delta         | Miss | Score     | Expect         | Rank     | Peptide                                                             |
|-----------------------|-----------------|------------------|------------------|---------------|------|-----------|----------------|----------|---------------------------------------------------------------------|
| <a href="#">351</a>   | 851.1480        | 850.1407         | 849.4742         | 0.6665        | 1    | 15        | 4.9            | 2        | -_MLSRSLK.R                                                         |
| <a href="#">668</a>   | <b>479.3491</b> | <b>956.6837</b>  | <b>956.5655</b>  | <b>0.1183</b> | 0    | <b>56</b> | <b>0.00047</b> | <b>1</b> | <b>K.SIIGELLGR.R <a href="#">672</a></b>                            |
| <a href="#">950</a>   | 509.1746        | 1016.3347        | 1014.4440        | 1.8907        | 0    | 5         | 54             | 5        | K.YGMGTSVER.A                                                       |
| <a href="#">1413</a>  | 555.3251        | 1108.6357        | 1106.6084        | 2.0273        | 1    | 9         | 20             | 6        | K.QDKLITAYR.S                                                       |
| <a href="#">5000</a>  | <b>779.3946</b> | <b>1556.7747</b> | <b>1554.9206</b> | <b>1.8542</b> | 2    | <b>4</b>  | <b>61</b>      | <b>3</b> | <b>R.GGTVKSIIIGELLGRR.D</b>                                         |
| <a href="#">6854</a>  | <b>852.6761</b> | <b>1703.3377</b> | <b>1702.8501</b> | <b>0.4876</b> | 0    | <b>71</b> | <b>1.2e-05</b> | <b>1</b> | <b>K.LWNLPVIFGCENNK.Y <a href="#">6859</a> <a href="#">6873</a></b> |
| <a href="#">7729</a>  | 596.2055        | 1785.5947        | 1782.8107        | 2.7840        | 1    | 4         | 59             | 3        | R.YAGHSMSDPGIAYRSR.E                                                |
| <a href="#">8967</a>  | 639.4589        | 1915.3547        | 1916.8673        | -1.5126       | 1    | 1         | 1.1e+02        | 10       | K.VNDEVAEAEKMPEPDTK.L                                               |
| <a href="#">10745</a> | 712.5535        | 2134.6387        | 2131.9943        | 2.6444        | 2    | 1         | 94             | 7        | R.SKVNDEVAEAEKMPEPDTK.L                                             |
| <a href="#">12112</a> | 775.1095        | 2322.3067        | 2324.1583        | -1.8516       | 0    | 4         | 49             | 4        | R.GFCHLSTGQEA VAVGIEHALTK.Q <a href="#">12122</a>                   |

200. [gi|220696689|gb|EED53031.1|](#) Mass: 76035 Score: 132 Queries matched: 14 emPAI: 0.09

leukotriene A4 hydrolase [Aspergillus flavus NRRL3357]

| Query                 | Observed        | Mr(expt)         | Mr(calc)         | Delta          | Miss | Score     | Expect         | Rank     | Peptide                                                                        |
|-----------------------|-----------------|------------------|------------------|----------------|------|-----------|----------------|----------|--------------------------------------------------------------------------------|
| <a href="#">1244</a>  | 539.9841        | 1077.9537        | 1077.6070        | 0.3467         | 0    | 6         | 41             | 5        | R.VLGEVYSLAK.S                                                                 |
| <a href="#">1938</a>  | <b>605.2431</b> | <b>1208.4717</b> | <b>1208.6852</b> | <b>-0.2135</b> | 1    | <b>10</b> | <b>15</b>      | <b>1</b> | <b>R.MKFVRPLYR.N</b>                                                           |
| <a href="#">3736</a>  | 473.5625        | 1417.6657        | 1415.7772        | 1.8885         | 0    | 6         | 41             | 7        | K.VNRPLAIETFEK.N                                                               |
| <a href="#">3874</a>  | 718.4691        | 1434.9237        | 1432.8303        | 2.0934         | 1    | 1         | 1.3e+02        | 7        | K.FVRPLYRNLQK.V                                                                |
| <a href="#">6338</a>  | <b>835.0866</b> | <b>1668.1587</b> | <b>1667.7679</b> | <b>0.3909</b>  | 1    | <b>12</b> | <b>9</b>       | <b>1</b> | <b>K.GKDPDDAFSSIPYEK.G</b>                                                     |
| <a href="#">10569</a> | <b>703.5169</b> | <b>2107.5287</b> | <b>2106.0455</b> | <b>1.4832</b>  | 0    | <b>52</b> | <b>0.00077</b> | <b>1</b> | <b>K.ATMLEFFQHDLEASNLLK.N <a href="#">10571</a></b>                            |
| <a href="#">11108</a> | 1092.5281       | 2183.0417        | 2182.1998        | 0.8419         | 0    | 6         | 34             | 2        | K.STIDFNITSPLPVVASGLPVR.G                                                      |
| <a href="#">12144</a> | 776.3452        | 2326.0137        | 2323.2113        | 2.8024         | 2    | 2         | 85             | 3        | K.GFNFLFHLENLLAKDKFDR.F                                                        |
| <a href="#">12340</a> | <b>787.5089</b> | <b>2359.5047</b> | <b>2357.2631</b> | <b>2.2417</b>  | 0    | <b>59</b> | <b>0.00017</b> | <b>1</b> | <b>K.LPIPSYLFALASGDISEAAIGPR.S <a href="#">12331</a> <a href="#">12344</a></b> |
| <a href="#">12559</a> | <b>798.1889</b> | <b>2391.5447</b> | <b>2390.2270</b> | <b>1.3177</b>  | 0    | <b>15</b> | <b>3.8</b>     | <b>1</b> | <b>K.VDGQASHWELLPPLEPYGAALK.I <a href="#">12556</a></b>                        |

201. [gi|220694934|gb|EED51277.1|](#) Mass: 14556 Score: 131 Queries matched: 7 emPAI: 0.23

NADH-ubiquinone oxidoreductase B14 subunit, putative [Aspergillus flavus NRRL3357]

| Query                | Observed | Mr(expt)  | Mr(calc)  | Delta   | Miss | Score | Expect  | Rank | Peptide                                                   |
|----------------------|----------|-----------|-----------|---------|------|-------|---------|------|-----------------------------------------------------------|
| <a href="#">1779</a> | 588.7306 | 1175.4467 | 1175.6299 | -0.1831 | 0    | 23    | 0.87    | 2    | M.TINPTYLAQR.T <a href="#">1777</a>                       |
| <a href="#">2993</a> | 669.4431 | 1336.8717 | 1335.6207 | 1.2510  | 0    | 11    | 13      | 1    | K.YFRPEEDPGAR.L <a href="#">2994</a> <a href="#">2995</a> |
| <a href="#">3993</a> | 724.1831 | 1446.3517 | 1445.7667 | 0.5850  | 0    | 86    | 4.1e-07 | 1    | R.LPPNFISGFLEGR.N <a href="#">3986</a>                    |

202. [gi|220692152|gb|EED48499.1|](#) Mass: 15603 Score: 130 Queries matched: 15 emPAI: 1.67

60S ribosomal protein L27e [Aspergillus flavus NRRL3357]

| Query                | Observed | Mr(expt)  | Mr(calc)  | Delta   | Miss | Score | Expect  | Rank | Peptide                                                   |
|----------------------|----------|-----------|-----------|---------|------|-------|---------|------|-----------------------------------------------------------|
| <a href="#">40</a>   | 672.5430 | 671.5357  | 671.4330  | 0.1027  | 0    | 17    | 3.7     | 1    | R.VAIITR.G <a href="#">42</a>                             |
| <a href="#">139</a>  | 745.5470 | 744.5397  | 744.4898  | 0.0499  | 0    | 16    | 6.1     | 2    | R.IKPFIK.V                                                |
| <a href="#">722</a>  | 484.0726 | 966.1307  | 965.5123  | 0.6184  | 0    | 29    | 0.19    | 1    | R.WFFTPLR.F <a href="#">721</a>                           |
| <a href="#">1169</a> | 533.3976 | 1064.7807 | 1064.5753 | 0.2054  | 0    | 33    | 0.073   | 1    | R.YTLELEGLK.G <a href="#">1167</a>                        |
| <a href="#">1435</a> | 557.7121 | 1113.4097 | 1112.5808 | 0.8290  | 1    | 31    | 0.14    | 1    | R.WFFTPLRF.- <a href="#">1440</a>                         |
| <a href="#">3047</a> | 672.3231 | 1342.6317 | 1342.6816 | -0.0499 | 0    | (38)  | 0.025   | 1    | K.VVNYNHLMPTR.Y                                           |
| <a href="#">3206</a> | 680.5966 | 1359.1787 | 1358.6765 | 0.5022  | 0    | 41    | 0.014   | 1    | K.VVNYNHLMPTR.Y <a href="#">3199</a> <a href="#">3212</a> |
| <a href="#">4435</a> | 750.8941 | 1499.7737 | 1499.7885 | -0.0148 | 0    | 79    | 2.1e-06 | 1    | K.AHPFAYAVVAGIER.Y                                        |
| <a href="#">7879</a> | 601.4069 | 1801.1987 | 1802.9890 | -1.7903 | 2    | 1     | 1.2e+02 | 8    | R.YAGKKVVIVQPNDTGSK.A                                     |

203. [gi|220701644|gb|EED57982.1|](#) Mass: 39515 Score: 130 Queries matched: 11 emPAI: 0.17

epoxide hydrolase, putative [Aspergillus flavus NRRL3357]

| Query                 | Observed  | Mr(expt)  | Mr(calc)  | Delta   | Miss | Score | Expect  | Rank | Peptide                                        |
|-----------------------|-----------|-----------|-----------|---------|------|-------|---------|------|------------------------------------------------|
| <a href="#">1806</a>  | 590.6276  | 1179.2407 | 1178.5602 | 0.6806  | 0    | 11    | 14      | 4    | R.DVICDTITSR.L <a href="#">1801</a>            |
| <a href="#">2491</a>  | 641.2136  | 1280.4127 | 1280.6513 | -0.2386 | 0    | 3     | 74      | 2    | K.AQIDAFASVGFR.A <a href="#">2496</a>          |
| <a href="#">2986</a>  | 669.1321  | 1336.2497 | 1335.6724 | 0.5773  | 0    | 44    | 0.0064  | 1    | R.GWQGFLLPYVNR.E <a href="#">2990</a>          |
| <a href="#">6430</a>  | 837.8126  | 1673.6107 | 1673.7066 | -0.0958 | 0    | 18    | 2.4     | 1    | K.TVEWFSDIAGMCK.A                              |
| <a href="#">6886</a>  | 569.6732  | 1705.9977 | 1705.8206 | 0.1771  | 1    | 2     | 87      | 4    | R.AIAPDMPGYGQSTARR.V                           |
| <a href="#">9007</a>  | 640.6975  | 1919.0707 | 1919.9445 | -0.8738 | 1    | 2     | 86      | 9    | R.DVICDTITSRLVEPMR.E                           |
| <a href="#">12324</a> | 1179.3991 | 2356.7837 | 2356.1416 | 0.6421  | 0    | 68    | 2.1e-05 | 1    | R.FIVEELPSEWPGFWTAGYTK.K <a href="#">12329</a> |

204. [gi|220701605|gb|EED57943.1|](#) Mass: 112558 Score: 129 Queries matched: 20 emPAI: 0.03

C1 tetrahydrofolate synthase, putative [Aspergillus flavus NRRL3357]

| Query                | Observed | Mr(expt)  | Mr(calc)  | Delta   | Miss | Score | Expect  | Rank | Peptide                          |
|----------------------|----------|-----------|-----------|---------|------|-------|---------|------|----------------------------------|
| <a href="#">517</a>  | 907.4730 | 906.4657  | 907.4222  | -0.9565 | 0    | 10    | 18      | 10   | -.MPFSSPAR.S <a href="#">521</a> |
| <a href="#">3134</a> | 676.7521 | 1351.4897 | 1352.7023 | -1.2126 | 2    | 5     | 53      | 6    | K.REFQPVMFKR.L                   |
| <a href="#">4100</a> | 730.4211 | 1458.8277 | 1460.6929 | -1.8652 | 1    | 2     | 99      | 5    | R.RSSYSTGTMAATK.I                |
| <a href="#">4445</a> | 751.4816 | 1500.9487 | 1502.7664 | -1.8176 | 1    | 1     | 1.4e+02 | 7    | -.MPFSSPARSAALPR.C               |
| <a href="#">4694</a> | 510.1392 | 1527.3957 | 1526.8417 | 0.5541  | 1    | 1     | 1.3e+02 | 7    | R.GITVQAPTEKGLTR.E               |

|                       |                  |                  |                  |                |          |          |           |          |                                                        |
|-----------------------|------------------|------------------|------------------|----------------|----------|----------|-----------|----------|--------------------------------------------------------|
| <a href="#">4921</a>  | 775.4846         | 1548.9547        | 1548.8848        | 0.0699         | 2        | 3        | 75        | 10       | K.VSLDVLDRLAHRR.N                                      |
| <a href="#">5678</a>  | 809.0976         | 1616.1807        | 1613.8989        | 2.2819         | 0        | 1        | 1.3e+02   | 2        | R.SSGLTPDVTVVIVATVR.A                                  |
| <a href="#">6424</a>  | <b>837.7606</b>  | <b>1673.5067</b> | <b>1673.8737</b> | <b>-0.3669</b> | <b>1</b> | <b>3</b> | <b>77</b> | <b>1</b> | <b>K.DVDGFGAINIGELAKR.G</b> <a href="#">6432</a>       |
| <a href="#">8388</a>  | 619.1629         | 1854.4667        | 1852.9570        | 1.5097         | 1        | 9        | 19        | 1        | K.DFKLLYELEGTIQR.I <a href="#">8405</a>                |
| <a href="#">9100</a>  | 645.2322         | 1932.6747        | 1930.0306        | 2.6441         | 1        | 2        | 90        | 6        | K.CRSSGLTPDVTVVIVATVR.A                                |
| <a href="#">9914</a>  | 678.6912         | 2033.0517        | 2033.9398        | -0.8881        | 0        | 2        | 87        | 7        | K.SGDPVTCDDIGAGGALAALMK.D <a href="#">9917</a>         |
| <a href="#">10145</a> | 1028.3376        | 2054.6607        | 2053.1671        | 1.4937         | 1        | 0        | 1.3e+02   | 7        | K.TPDVESIIKTADILVAALGK.T                               |
| <a href="#">10697</a> | 1064.3361        | 2126.6577        | 2125.1518        | 1.5059         | 0        | 99       | 1.7e-08   | 1        | K.IVNLPETAIESELLQDITK.A <a href="#">10686</a>          |
| <a href="#">10860</a> | <b>1074.3336</b> | <b>2146.6527</b> | <b>2147.0416</b> | <b>-0.3889</b> | <b>1</b> | <b>8</b> | <b>22</b> | <b>1</b> | <b>R.SSYSTGTTMAATKIDGTQIAK.N</b> <a href="#">10872</a> |

205. [gi|220697901|gb|EED54241.1|](#) Mass: 47101 Score: 129 Queries matched: 14 emPAI: 0.15

cofactor for methionyl- and glutamyl-tRNA synthetase, putative [Aspergillus flavus NRRL3357]

| Query                 | Observed         | Mr(expt)         | Mr(calc)         | Delta         | Miss     | Score     | Expect         | Rank     | Peptide                                                   |
|-----------------------|------------------|------------------|------------------|---------------|----------|-----------|----------------|----------|-----------------------------------------------------------|
| <a href="#">1305</a>  | 545.5796         | 1089.1447        | 1088.5648        | 0.5799        | 0        | 17        | 4              | 2        | K.SAAMVLAASPR.V <a href="#">1309</a> <a href="#">1321</a> |
| <a href="#">7142</a>  | <b>867.6431</b>  | <b>1733.2717</b> | <b>1732.9359</b> | <b>0.3358</b> | <b>0</b> | <b>55</b> | <b>0.00045</b> | <b>1</b> | <b>M.AINSAPESLLSIIYR.S</b> <a href="#">7141</a>           |
| <a href="#">7621</a>  | 890.1826         | 1778.3507        | 1777.9686        | 0.3821        | 0        | 1         | 1.1e+02        | 2        | K.AAAQNAGAPAESKPLVVGK.G                                   |
| <a href="#">8193</a>  | 612.2142         | 1833.6207        | 1831.9792        | 1.6416        | 1        | 13        | 7.4            | 3        | K.GKPEAPKEGAAPAAEGKPK.K                                   |
| <a href="#">8806</a>  | 634.0635         | 1899.1687        | 1899.0036        | 0.1651        | 0        | 2         | 81             | 3        | K.AKPAPAPAAPSPCAIDLR.V                                    |
| <a href="#">9405</a>  | 658.1592         | 1971.4557        | 1972.9710        | -1.5153       | 0        | 2         | 87             | 6        | R.TVCSGLNGLIPEEMQGR.K                                     |
| <a href="#">9985</a>  | 680.1715         | 2037.4927        | 2035.1062        | 2.3866        | 1        | 1         | 1.2e+02        | 9        | K.EKAAAQNAGAPAESKPLVVGK.G                                 |
| <a href="#">11079</a> | <b>726.8822</b>  | <b>2177.6247</b> | <b>2175.2012</b> | <b>2.4236</b> | <b>0</b> | <b>19</b> | <b>1.5</b>     | <b>1</b> | <b>K.DEKPVITITILGQLNGHLATR.T</b>                          |
| <a href="#">11194</a> | <b>1097.0791</b> | <b>2192.1437</b> | <b>2191.0896</b> | <b>1.0541</b> | <b>0</b> | <b>69</b> | <b>1.6e-05</b> | <b>1</b> | <b>R.SYPTAVSPDATETDLLTVSPK.I</b>                          |
| <a href="#">13157</a> | 826.0335         | 2475.0787        | 2473.2781        | 1.8006        | 2        | 2         | 79             | 8        | K.TVRTVCSGLNGLIPEEMQGRK.I                                 |
| <a href="#">13575</a> | <b>843.5709</b>  | <b>2527.6907</b> | <b>2526.4309</b> | <b>1.2599</b> | <b>0</b> | <b>14</b> | <b>5.1</b>     | <b>1</b> | <b>R.TTILGSKPSVADIAAYALLAPVVEK.W</b>                      |

206. [gi|220695108|gb|EED51451.1|](#) Mass: 37711 Score: 127 Queries matched: 6 emPAI: 0.09

nucleoside-diphosphate-sugar epimerase, putative [Aspergillus flavus NRRL3357]

| Query                 | Observed        | Mr(expt)         | Mr(calc)         | Delta         | Miss     | Score      | Expect         | Rank     | Peptide                                 |
|-----------------------|-----------------|------------------|------------------|---------------|----------|------------|----------------|----------|-----------------------------------------|
| <a href="#">3065</a>  | 673.6036        | 1345.1927        | 1345.7394        | -0.5467       | 0        | 2          | 1.1e+02        | 3        | K.LFGWSPSKPSLK.E                        |
| <a href="#">3304</a>  | 685.1321        | 1368.2497        | 1367.7548        | 0.4950        | 0        | 8          | 23             | 3        | K.ELIPEIVDLEAK.N                        |
| <a href="#">4450</a>  | 751.6521        | 1501.2897        | 1500.7759        | 0.5138        | 0        | 20         | 1.6            | 2        | K.TAIVCPPTIYGPR.G <a href="#">4440</a>  |
| <a href="#">6797</a>  | 851.3341        | 1700.6537        | 1700.9726        | -0.3189       | 2        | 1          | 1.3e+02        | 7        | R.ARKLFGWSPSKPSLK.E                     |
| <a href="#">15179</a> | <b>955.7929</b> | <b>2864.3567</b> | <b>2862.4049</b> | <b>1.9518</b> | <b>0</b> | <b>127</b> | <b>2.1e-11</b> | <b>1</b> | <b>K.NIWHQVHVQDLSDVYGALADAAAAGGGK.A</b> |

207. [gi|220691359|gb|EED47707.1|](#) Mass: 14972 Score: 126 Queries matched: 15 emPAI: 0.51

60S ribosomal protein L32 [Aspergillus flavus NRRL3357]

| Query               | Observed        | Mr(expt)        | Mr(calc)        | Delta         | Miss     | Score     | Expect       | Rank     | Peptide                                |
|---------------------|-----------------|-----------------|-----------------|---------------|----------|-----------|--------------|----------|----------------------------------------|
| <a href="#">39</a>  | 672.5100        | 671.5027        | 671.4218        | 0.0810        | 0        | 32        | 0.12         | 2        | R.VEIIAK.A                             |
| <a href="#">572</a> | <b>459.1906</b> | <b>916.3667</b> | <b>915.5178</b> | <b>0.8489</b> | <b>0</b> | <b>35</b> | <b>0.069</b> | <b>1</b> | <b>K.AFLVQNP.K</b> <a href="#">570</a> |

|                       |                 |                  |                  |               |          |           |                |          |                                                                                                              |
|-----------------------|-----------------|------------------|------------------|---------------|----------|-----------|----------------|----------|--------------------------------------------------------------------------------------------------------------|
| <a href="#">2119</a>  | 619.9196        | 1237.8247        | 1238.6441        | -0.8194       | 0        | (18)      | 2.2            | 2        | K.DVELLLMHNR.T                                                                                               |
| <a href="#">2245</a>  | <b>628.3576</b> | <b>1254.7007</b> | <b>1254.6390</b> | <b>0.0617</b> | <b>0</b> | <b>28</b> | <b>0.27</b>    | <b>1</b> | <b>K.DVELLLMHNR.T</b> <a href="#">2254</a>                                                                   |
| <a href="#">2552</a>  | 430.1202        | 1287.3387        | 1285.6601        | 1.6786        | 1        | 11        | 14             | 7        | K.CVPESWRKPK.G                                                                                               |
| <a href="#">3236</a>  | <b>681.6961</b> | <b>1361.3777</b> | <b>1360.6735</b> | <b>0.7042</b> | <b>0</b> | <b>84</b> | <b>7e-07</b>   | <b>1</b> | <b>R.TYAAEIGHAVSSR.K</b> <a href="#">3208</a> <a href="#">3238</a> <a href="#">3258</a> <a href="#">3262</a> |
| <a href="#">5561</a>  | <b>805.1611</b> | <b>1608.3077</b> | <b>1607.7977</b> | <b>0.5100</b> | <b>1</b> | <b>10</b> | <b>16</b>      | <b>1</b> | <b>K.SNIPMPSIGYGSNKK.T</b>                                                                                   |
| <a href="#">8217</a>  | 919.7316        | 1837.4487        | 1836.9404        | 0.5084        | 2        | 4         | 58             | 5        | K.SNIPMPSIGYGSNKKTK.H                                                                                        |
| <a href="#">10786</a> | <b>713.8975</b> | <b>2138.6707</b> | <b>2136.1514</b> | <b>2.5194</b> | <b>1</b> | <b>1</b>  | <b>1.1e+02</b> | <b>4</b> | <b>K.AFLVQNPKDVELLLMHNR.T</b>                                                                                |

208. [gi|220700651|gb|EED56989.1|](#) Mass: 30156 Score: 126 Queries matched: 5 empAI: 0.23

proteasome component Pre8, putative [Aspergillus flavus NRRL3357]

| Query                 | Observed         | Mr(expt)         | Mr(calc)         | Delta         | Miss     | Score      | Expect         | Rank     | Peptide                           |
|-----------------------|------------------|------------------|------------------|---------------|----------|------------|----------------|----------|-----------------------------------|
| <a href="#">1227</a>  | 359.0512         | 1074.1317        | 1072.6604        | 1.4713        | 2        | 11         | 14             | 3        | K.KATGKTGGILK.G                   |
| <a href="#">2909</a>  | 665.0001         | 1327.9857        | 1326.7031        | 1.2826        | 0        | 6          | 48             | 2        | K.SSSPLIDPPSLSK.V                 |
| <a href="#">10913</a> | <b>1078.2871</b> | <b>2154.5597</b> | <b>2154.0489</b> | <b>0.5108</b> | <b>0</b> | <b>106</b> | <b>3.3e-09</b> | <b>1</b> | <b>K.VSLITPDIGMVYAGMPDYR.V</b>    |
| <a href="#">11366</a> | <b>739.1509</b>  | <b>2214.4307</b> | <b>2213.2419</b> | <b>1.1888</b> | <b>0</b> | <b>42</b>  | <b>0.0084</b>  | <b>1</b> | <b>K.LVQIEYALNAVNQGV TALGIK.A</b> |
| <a href="#">14710</a> | 909.7625         | 2726.2657        | 2724.3867        | 1.8791        | 1        | 1          | 89             | 4        | K.VSLITPDIGMVYAGMPDYRVLVDK.A      |

209. [gi|220696408|gb|EED52750.1|](#) Mass: 11080 Score: 125 Queries matched: 5 empAI: 0.72

60S acidic ribosomal protein P2/allergen Asp F 8 [Aspergillus flavus NRRL3357]

| Query                 | Observed        | Mr(expt)         | Mr(calc)         | Delta         | Miss     | Score     | Expect         | Rank     | Peptide                               |
|-----------------------|-----------------|------------------|------------------|---------------|----------|-----------|----------------|----------|---------------------------------------|
| <a href="#">428</a>   | 874.4910        | 873.4837         | 873.4807         | 0.0030        | 0        | 34        | 0.093          | 1        | K.VISELEGK.D                          |
| <a href="#">3218</a>  | 681.2291        | 1360.4437        | 1359.6882        | 0.7556        | 0        | 83        | 8.4e-07        | 1        | K.DLQQLITEGSEK.L <a href="#">3213</a> |
| <a href="#">11390</a> | <b>740.3129</b> | <b>2217.9167</b> | <b>2215.1583</b> | <b>2.7584</b> | <b>1</b> | <b>59</b> | <b>0.00015</b> | <b>1</b> | <b>K.VISELEGKDLQQLITEGSEK.L</b>       |
| <a href="#">13920</a> | 862.7202        | 2585.1387        | 2584.3959        | 0.7428        | 2        | 0         | 1.1e+02        | 7        | R.LQKVICELEGKDLQQLITEGSEK.L           |

210. [gi|220690318|gb|EED46668.1|](#) Mass: 58675 Score: 125 Queries matched: 16 empAI: 0.06

glutaryl-CoA dehydrogenase, putative [Aspergillus flavus NRRL3357]

| Query                 | Observed        | Mr(expt)         | Mr(calc)         | Delta          | Miss     | Score      | Expect         | Rank      | Peptide                                                              |
|-----------------------|-----------------|------------------|------------------|----------------|----------|------------|----------------|-----------|----------------------------------------------------------------------|
| <a href="#">1550</a>  | 566.3611        | 1130.7077        | 1129.6608        | 1.0470         | 2        | 1          | 1.6e+02        | 8         | R.KQFKGNPLAK.Y                                                       |
| <a href="#">2178</a>  | 624.2556        | 1246.4967        | 1244.6401        | 1.8566         | 0        | 21         | 1.3            | 2         | R.DQWSPALTISK.V <a href="#">2184</a>                                 |
| <a href="#">7144</a>  | <b>868.6081</b> | <b>1735.2017</b> | <b>1736.8437</b> | <b>-1.6420</b> | <b>2</b> | <b>1</b>   | <b>1.1e+02</b> | <b>3</b>  | <b>K.DEGKSTPEMISMIKR.Q</b>                                           |
| <a href="#">8085</a>  | <b>607.8189</b> | <b>1820.4347</b> | <b>1821.9216</b> | <b>-1.4869</b> | <b>2</b> | <b>6</b>   |                | <b>35</b> | <b>R.LKDEGKSTPEMISMIK.R</b>                                          |
| <a href="#">8108</a>  | <b>608.8162</b> | <b>1823.4267</b> | <b>1821.9216</b> | <b>1.5051</b>  | <b>2</b> | <b>(3)</b> |                | <b>74</b> | <b>R.LKDEGKSTPEMISMIK.R</b>                                          |
| <a href="#">9281</a>  | 978.6871        | 1955.3597        | 1956.0720        | -0.7123        | 0        | 2          | 89             | 5         | K.TWITNSPISDILIVWAK.L                                                |
| <a href="#">9348</a>  | <b>655.6682</b> | <b>1963.9827</b> | <b>1964.9230</b> | <b>-0.9403</b> | <b>2</b> | <b>3</b>   |                | <b>75</b> | <b>K.STPEMISMIKRQNCDR.A</b>                                          |
| <a href="#">10179</a> | 686.9025        | 2057.6857        | 2059.0559        | -1.3702        | 0        | 3          | 59             | 10        | R.LQSASHVHNAPTASLNASVR.G <a href="#">10174</a> <a href="#">10176</a> |
| <a href="#">13206</a> | 828.2562        | 2481.7467        | 2479.1611        | 2.5857         | 0        | 0          | 1.2e+02        | 7         | R.SGMSVQSSLAMTAIYEFQSQELK.D                                          |
| <a href="#">13860</a> | 858.6879        | 2573.0417        | 2571.3948        | 1.6469         | 1        | 1          | 90             | 5         | K.TWITNSPISDILIVWAKLESTGK.I                                          |
| <a href="#">14830</a> | <b>922.4435</b> | <b>2764.3087</b> | <b>2766.2840</b> | <b>-1.9753</b> | <b>1</b> | <b>1</b>   |                | <b>95</b> | <b>R.SGMSVQSSLAMTAIYEFQSQELKDR.F</b>                                 |

[15522](#) [1013.3212](#) [3036.9417](#) [3035.5348](#) [1.4069](#) [0](#) [92](#) [5.7e-08](#) [1](#) [K.VLLSICSMMLTDPNPDDPLVPEIAHVYK.T](#) [15531](#)

211. [gi|220692679|gb|EED49025.1|](#) **Mass:** 18720 **Score:** 125 **Queries matched:** 14 **emPAI:** 0.64

allergen Asp F3 [Aspergillus flavus NRRL3357]

| Query                 | Observed | Mr(expt)  | Mr(calc)  | Delta   | Miss | Score | Expect  | Rank | Peptide                                                                       |
|-----------------------|----------|-----------|-----------|---------|------|-------|---------|------|-------------------------------------------------------------------------------|
| <a href="#">939</a>   | 508.5816 | 1015.1487 | 1014.5498 | 0.5989  | 0    | 33    | 0.087   | 1    | R.YAIVIDHGK.V                                                                 |
| <a href="#">1158</a>  | 532.1121 | 1062.2097 | 1061.5757 | 0.6340  | 0    | 51    | 0.0015  | 1    | K.VTYAALEPAK.N <a href="#">1154</a> <a href="#">1155</a> <a href="#">1157</a> |
| <a href="#">1468</a>  | 560.5121 | 1119.0097 | 1118.4992 | 0.5105  | 0    | 32    | 0.12    | 1    | K.SLGWADEEGR.T <a href="#">1461</a>                                           |
| <a href="#">4126</a>  | 731.8361 | 1461.6577 | 1461.6987 | -0.0410 | 0    | 71    | 1.4e-05 | 1    | K.NDDILFLSDPDAK.F <a href="#">4127</a>                                        |
| <a href="#">4847</a>  | 772.2601 | 1542.5057 | 1542.8154 | -0.3097 | 1    | 7     | 28      | 1    | K.NHLEFSRAETVIK.H                                                             |
| <a href="#">5394</a>  | 798.1886 | 1594.3627 | 1595.7766 | -1.4139 | 0    | 4     | 58      | 2    | K.FNVCGIPINYNASK.E <a href="#">5392</a>                                       |
| <a href="#">13607</a> | 844.6389 | 2530.8947 | 2529.3090 | 1.5857  | 0    | 26    | 0.26    | 1    | K.VILFALPGAFTPVCSANHVPEYK.E <a href="#">13594</a>                             |

212. [gi|220701354|gb|EED57692.1|](#) **Mass:** 37539 **Score:** 125 **Queries matched:** 17 **emPAI:** 0.40

oxidoreductase, zinc-binding dehydrogenase family, putative [Aspergillus flavus NRRL3357]

| Query                 | Observed  | Mr(expt)  | Mr(calc)  | Delta  | Miss | Score | Expect  | Rank | Peptide                                         |
|-----------------------|-----------|-----------|-----------|--------|------|-------|---------|------|-------------------------------------------------|
| <a href="#">9</a>     | 616.6210  | 615.6137  | 614.4115  | 1.2022 | 1    | 4     | 92      | 3    | K.GKAVLK.F                                      |
| <a href="#">5024</a>  | 520.5835  | 1558.7287 | 1557.7497 | 0.9790 | 1    | 2     | 96      | 7    | R.GFIVGDAGMGDKYTK.E <a href="#">5025</a>        |
| <a href="#">5899</a>  | 818.3456  | 1634.6767 | 1633.9151 | 0.7616 | 0    | 41    | 0.012   | 1    | R.IRPLENPLGIEDIR.V <a href="#">5898</a>         |
| <a href="#">6351</a>  | 835.5661  | 1669.1177 | 1666.8171 | 2.3006 | 1    | 4     | 58      | 2    | R.LTMRGFIVGDAGMGDK.Y                            |
| <a href="#">8238</a>  | 920.9091  | 1839.8037 | 1838.9131 | 0.8906 | 2    | (1)   | 1e+02   | 4    | K.RLTMRGFIVGDAGMGDK.Y                           |
| <a href="#">8240</a>  | 614.4069  | 1840.1987 | 1838.9131 | 1.2856 | 2    | 6     | 37      | 2    | K.RLTMRGFIVGDAGMGDK.Y                           |
| <a href="#">9756</a>  | 672.6525  | 2014.9357 | 2013.9717 | 0.9640 | 0    | 15    | 4.1     | 1    | K.SYSPAFAMDKPIDSSSIK.V <a href="#">9737</a>     |
| <a href="#">10040</a> | 681.8565  | 2042.5477 | 2041.0013 | 1.5465 | 0    | 3     | 66      | 8    | R.VVCGMISQYNSAPYPIK.N                           |
| <a href="#">10328</a> | 692.6872  | 2075.0397 | 2075.0180 | 0.0217 | 2    | 4     | 56      | 2    | R.LTMRGFIVGDAGMGDKYTK.E                         |
| <a href="#">11482</a> | 1117.0346 | 2232.0547 | 2230.2321 | 1.8226 | 1    | 82    | 7.6e-07 | 1    | K.KGETIFVSAASGAVQLVQLAK.H <a href="#">11480</a> |
| <a href="#">12471</a> | 794.6819  | 2381.0237 | 2378.2230 | 2.8007 | 0    | 3     | 55      | 1    | K.ALTHETVGDIDNSADALLGIFHGK.N                    |
| <a href="#">13448</a> | 838.4835  | 2512.4287 | 2511.3447 | 1.0840 | 0    | 9     | 13      | 1    | R.VFLGALGMPGLTAYSSLYEIGKPK.K                    |
| <a href="#">16026</a> | 1094.3209 | 3279.9407 | 3277.5349 | 2.4058 | 0    | 33    | 0.05    | 1    | R.LAPEGIDIYYENVGGEHLEAALDAMNFR.V                |

213. [gi|220700053|gb|EED56392.1|](#) **Mass:** 57182 **Score:** 124 **Queries matched:** 14 **emPAI:** 0.06

PH domain protein [Aspergillus flavus NRRL3357]

| Query                | Observed | Mr(expt)  | Mr(calc)  | Delta   | Miss | Score | Expect  | Rank | Peptide                                                     |
|----------------------|----------|-----------|-----------|---------|------|-------|---------|------|-------------------------------------------------------------|
| <a href="#">2722</a> | 654.6611 | 1307.3077 | 1305.6598 | 1.6479  | 0    | 8     | 25      | 2    | R.ATMALIEGSLER.K                                            |
| <a href="#">3278</a> | 683.6211 | 1365.2277 | 1363.6707 | 1.5570  | 1    | 6     | 35      | 9    | K.WWTVIKDCR.G                                               |
| <a href="#">3739</a> | 710.1196 | 1418.2247 | 1417.7599 | 0.4649  | 1    | 16    | 3.9     | 3    | R.ATMALIEGSLERK.S <a href="#">3717</a> <a href="#">3740</a> |
| <a href="#">3867</a> | 478.5692 | 1432.6857 | 1433.7263 | -1.0405 | 0    | 8     | 29      | 8    | K.NDNVLINPDAPPR.T                                           |
| <a href="#">5526</a> | 803.4041 | 1604.7937 | 1604.8239 | -0.0302 | 0    | 75    | 5.2e-06 | 1    | K.IPPDFEWNFITK.N <a href="#">5533</a> <a href="#">5559</a>  |
| <a href="#">5633</a> | 807.2961 | 1612.5777 | 1611.8692 | 0.7085  | 2    | 1     | 1.3e+02 | 9    | R.LNKQIIIEENNRK.D <a href="#">5638</a>                      |

|                       |                 |                  |                  |                |          |          |           |          |                                |
|-----------------------|-----------------|------------------|------------------|----------------|----------|----------|-----------|----------|--------------------------------|
| <a href="#">7892</a>  | <b>901.9811</b> | <b>1801.9477</b> | <b>1801.8015</b> | <b>0.1462</b>  | <b>0</b> | <b>6</b> | <b>34</b> | <b>1</b> | <b>K.HMCGYLEDYVTVTSK.V</b>     |
| <a href="#">10647</a> | <b>707.6702</b> | <b>2119.9887</b> | <b>2121.0677</b> | <b>-1.0790</b> | <b>2</b> | <b>2</b> | <b>84</b> | <b>6</b> | <b>K.SRAMLKGYSSGYVVTTPAR.Y</b> |
| <a href="#">14799</a> | 918.5162        | 2752.5267        | 2752.2093        | 0.3174         | 1        | 1        | 89        | 6        | R.RASMSDDEAIPDSDSSETTNLLNER.L  |

214. [gi|220690447|gb|EED46796.1|](#) Mass: 26723 Score: 124 Queries matched: 8 emPAI: 0.26

translation initiation factor eIF-6, putative [Aspergillus flavus NRRL3357]

| Query                 | Observed         | Mr(expt)         | Mr(calc)         | Delta          | Miss     | Score     | Expect         | Rank     | Peptide                                                                          |
|-----------------------|------------------|------------------|------------------|----------------|----------|-----------|----------------|----------|----------------------------------------------------------------------------------|
| <a href="#">5568</a>  | 537.2475         | 1608.7207        | 1605.7603        | 2.9604         | 1        | 3         | 85             | 8        | R.LGEMGPRGVGMGSTNK.E <a href="#">5554</a>                                        |
| <a href="#">10794</a> | <b>1071.2991</b> | <b>2140.5837</b> | <b>2139.1172</b> | <b>1.4666</b>  | <b>0</b> | <b>77</b> | <b>2.6e-06</b> | <b>1</b> | <b>R.DQDELSLLQVPLVAGSVNR.G <a href="#">10789</a></b>                             |
| <a href="#">13871</a> | <b>859.2355</b>  | <b>2574.6847</b> | <b>2576.1887</b> | <b>-1.5040</b> | <b>2</b> | <b>3</b>  | <b>65</b>      | <b>1</b> | <b>R.LGEMGPRGVGMGSTNKESIVESFY.-</b>                                              |
| <a href="#">14071</a> | <b>872.6255</b>  | <b>2614.8547</b> | <b>2613.3221</b> | <b>1.5326</b>  | <b>0</b> | <b>38</b> | <b>0.016</b>   | <b>1</b> | <b>R.QTIADNVLTGSYMALSNQGGIVHPK.T <a href="#">14068</a> <a href="#">14076</a></b> |

215. [gi|46370508|gb|AAS90042.1|](#) Mass: 70350 Score: 124 Queries matched: 27 emPAI: 0.20

VBS [Aspergillus flavus]

| Query                 | Observed         | Mr(expt)         | Mr(calc)         | Delta          | Miss     | Score     | Expect       | Rank     | Peptide                                                                 |
|-----------------------|------------------|------------------|------------------|----------------|----------|-----------|--------------|----------|-------------------------------------------------------------------------|
| <a href="#">314</a>   | 421.0041         | 839.9937         | 840.5545         | -0.5608        | 1        | 7         | 28           | 9        | R.VLGVKGLR.V                                                            |
| <a href="#">913</a>   | <b>503.6206</b>  | <b>1005.2267</b> | <b>1005.4880</b> | <b>-0.2612</b> | <b>0</b> | <b>30</b> | <b>0.18</b>  | <b>1</b> | <b>R.VLFDDQNR.A</b>                                                     |
| <a href="#">1025</a>  | 518.9821         | 1035.9497        | 1034.5066        | 1.4431         | 0        | 4         | 64           | 6        | R.EIVASDVMR.E                                                           |
| <a href="#">1191</a>  | 535.2076         | 1068.4007        | 1067.6927        | 0.7080         | 2        | 10        | 16           | 6        | K.ARVLGVKGLR.V                                                          |
| <a href="#">1575</a>  | <b>1134.9860</b> | <b>1133.9787</b> | <b>1133.5564</b> | <b>0.4223</b>  | <b>1</b> | <b>12</b> | <b>9.3</b>   | <b>1</b> | <b>K.ADDSKAVVDSK.A</b>                                                  |
| <a href="#">2160</a>  | <b>623.2131</b>  | <b>1244.4117</b> | <b>1244.5819</b> | <b>-0.1702</b> | <b>0</b> | <b>3</b>  | <b>79</b>    | <b>1</b> | <b>K.VESHSQLMGNK.E</b>                                                  |
| <a href="#">2584</a>  | 646.6121         | 1291.2097        | 1289.7092        | 1.5006         | 0        | 13        | 8.5          | 3        | K.EHLEQLGIPVR.S <a href="#">2576</a> <a href="#">2579</a>               |
| <a href="#">2750</a>  | <b>656.0041</b>  | <b>1309.9937</b> | <b>1308.6245</b> | <b>1.3693</b>  | <b>1</b> | <b>12</b> | <b>9.7</b>   | <b>1</b> | <b>R.DQEMAVAAFRR.C</b>                                                  |
| <a href="#">2873</a>  | 663.8056         | 1325.5967        | 1325.7377        | -0.1410        | 0        | (11)      | 14           | 5        | R.SPQLLMVSGIGPK.E                                                       |
| <a href="#">3013</a>  | 670.7451         | 1339.4757        | 1340.8140        | -1.3383        | 2        | 2         | 95           | 8        | K.AVVDSKARVLGVK.G                                                       |
| <a href="#">3044</a>  | <b>672.1071</b>  | <b>1342.1997</b> | <b>1341.7326</b> | <b>0.4671</b>  | <b>0</b> | <b>40</b> | <b>0.017</b> | <b>1</b> | <b>R.SPQLLMVSGIGPK.E <a href="#">3056</a></b>                           |
| <a href="#">4163</a>  | <b>489.6049</b>  | <b>1465.7927</b> | <b>1464.7361</b> | <b>1.0566</b>  | <b>0</b> | <b>12</b> | <b>9.2</b>   | <b>1</b> | <b>R.SYITHTINPYTR.R</b>                                                 |
| <a href="#">5589</a>  | 537.6929         | 1610.0567        | 1608.7613        | 1.2954         | 2        | 4         | 67           | 7        | R.DQEMAVAAFRRCR.E                                                       |
| <a href="#">6130</a>  | 826.8116         | 1651.6087        | 1650.8035        | 0.8052         | 0        | 13        | 7.1          | 2        | R.EALMESNNLNIFTR.T                                                      |
| <a href="#">6782</a>  | <b>850.7426</b>  | <b>1699.4707</b> | <b>1698.8253</b> | <b>0.6454</b>  | <b>0</b> | <b>79</b> | <b>2e-06</b> | <b>1</b> | <b>K.GLLTNPQDYFAFEK.H <a href="#">6778</a></b>                          |
| <a href="#">7064</a>  | 575.5309         | 1723.5707        | 1721.7905        | 1.7802         | 0        | 4         | 60           | 10       | K.NYFMSAALMTPF SR.G                                                     |
| <a href="#">7828</a>  | <b>898.6956</b>  | <b>1795.3767</b> | <b>1793.8519</b> | <b>1.5248</b>  | <b>0</b> | <b>18</b> | <b>2.2</b>   | <b>1</b> | <b>K.MGFPEAQGF SNGNLLGR.S <a href="#">7816</a> <a href="#">7836</a></b> |
| <a href="#">7955</a>  | 603.8105         | 1808.4097        | 1809.8468        | -1.4371        | 0        | (5)       | 45           | 4        | K.MGFPEAQGF SNGNLLGR.S                                                  |
| <a href="#">13543</a> | <b>841.9519</b>  | <b>2522.8337</b> | <b>2521.2754</b> | <b>1.5583</b>  | <b>1</b> | <b>28</b> | <b>0.2</b>   | <b>1</b> | <b>K.VKNPLFDWYQTTPQPLAQR.E <a href="#">13551</a></b>                    |
| <a href="#">14217</a> | <b>883.4865</b>  | <b>2647.4377</b> | <b>2645.2755</b> | <b>2.1623</b>  | <b>1</b> | <b>2</b>  | <b>70</b>    | <b>1</b> | <b>R.ETASSYLREALMESNNLNIFTR.T</b>                                       |

216. [gi|46370556|gb|AAS90088.1|](#) Mass: 70334 Score: 124 Queries matched: 27 emPAI: 0.20

VBS [Aspergillus flavus]

| Query | Observed | Mr(expt) | Mr(calc) | Delta | Miss | Score | Expect | Rank | Peptide |
|-------|----------|----------|----------|-------|------|-------|--------|------|---------|
|-------|----------|----------|----------|-------|------|-------|--------|------|---------|



|                       |                  |                  |                  |                |          |           |              |           |                                                                       |
|-----------------------|------------------|------------------|------------------|----------------|----------|-----------|--------------|-----------|-----------------------------------------------------------------------|
| <a href="#">314</a>   | 421.0041         | 839.9937         | 840.5545         | -0.5608        | 1        | 7         | 28           | 9         | R.VLGVKGLR.V                                                          |
| <a href="#">913</a>   | <b>503.6206</b>  | <b>1005.2267</b> | <b>1005.4880</b> | <b>-0.2612</b> | <b>0</b> | <b>30</b> | <b>0.18</b>  | <b>1</b>  | <b>R.VLFDDQNR.A</b>                                                   |
| <a href="#">1025</a>  | 518.9821         | 1035.9497        | 1034.5066        | 1.4431         | 0        | 4         | 64           | 6         | R.EIVASDVMR.E                                                         |
| <a href="#">1191</a>  | 535.2076         | 1068.4007        | 1067.6927        | 0.7080         | 2        | 10        | 16           | 6         | K.ARVLGVKGLR.V                                                        |
| <a href="#">1575</a>  | <b>1134.9860</b> | <b>1133.9787</b> | <b>1133.5564</b> | <b>0.4223</b>  | <b>1</b> | <b>12</b> | <b>9.3</b>   | <b>1</b>  | <b>K.ADDSKAVVDSK.A</b>                                                |
| <a href="#">2160</a>  | <b>623.2131</b>  | <b>1244.4117</b> | <b>1244.5819</b> | <b>-0.1702</b> | <b>0</b> | <b>3</b>  | <b>79</b>    | <b>1</b>  | <b>K.VESHSQLMGNK.E</b>                                                |
| <a href="#">2584</a>  | 646.6121         | 1291.2097        | 1289.7092        | 1.5006         | 0        | 13        | 8.5          | 3         | K.EHLEQLGIPVR.S <a href="#">2576</a> <a href="#">2579</a>             |
| <a href="#">2750</a>  | <b>656.0041</b>  | <b>1309.9937</b> | <b>1308.6245</b> | <b>1.3693</b>  | <b>1</b> | <b>12</b> | <b>9.7</b>   | <b>1</b>  | <b>R.DQEMAVAAFRR.C</b>                                                |
| <a href="#">2873</a>  | 663.8056         | 1325.5967        | 1325.7377        | -0.1410        | 0        | (11)      | 14           | 5         | R.SPQLLMVSGIGPK.E                                                     |
| <a href="#">3013</a>  | 670.7451         | 1339.4757        | 1340.8140        | -1.3383        | 2        | 2         | 95           | 8         | K.AVVDSKARVLGVK.G                                                     |
| <a href="#">3044</a>  | <b>672.1071</b>  | <b>1342.1997</b> | <b>1341.7326</b> | <b>0.4671</b>  | <b>0</b> | <b>40</b> | <b>0.017</b> | <b>1</b>  | <b>R.SPQLLMVSGIGPK.E</b> <a href="#">3056</a>                         |
| <a href="#">4163</a>  | <b>489.6049</b>  | <b>1465.7927</b> | <b>1464.7361</b> | <b>1.0566</b>  | <b>0</b> | <b>12</b> | <b>9.2</b>   | <b>1</b>  | <b>R.SYITHITINPYTR.R</b>                                              |
| <a href="#">5589</a>  | 537.6929         | 1610.0567        | 1608.7613        | 1.2954         | 2        | 4         | 67           | 7         | R.DQEMAVAAFRRCR.E                                                     |
| <a href="#">6782</a>  | <b>850.7426</b>  | <b>1699.4707</b> | <b>1698.8253</b> | <b>0.6454</b>  | <b>0</b> | <b>79</b> | <b>2e-06</b> | <b>1</b>  | <b>K.GLLTNPQDYFAFEK.H</b> <a href="#">6778</a>                        |
| <a href="#">7064</a>  | 575.5309         | 1723.5707        | 1721.7905        | 1.7802         | 0        | 4         | 60           | 10        | K.NYFSMSAALMTPFSR.G                                                   |
| <a href="#">7828</a>  | <b>898.6956</b>  | <b>1795.3767</b> | <b>1793.8519</b> | <b>1.5248</b>  | <b>0</b> | <b>18</b> | <b>2.2</b>   | <b>1</b>  | <b>K.MGFPEAQGFSGNLLGR.S</b> <a href="#">7816</a> <a href="#">7836</a> |
| <a href="#">7955</a>  | 603.8105         | 1808.4097        | 1809.8468        | -1.4371        | 0        | (5)       | 45           | 4         | K.MGFPEAQGFSGNLLGR.S                                                  |
| <a href="#">8054</a>  | 909.6501         | 1817.2857        | 1816.8512        | 0.4345         | 1        | 2         | 98           | 10        | R.ETASSSYLREALMESK.N                                                  |
| <a href="#">10668</a> | <b>708.7585</b>  | <b>2123.2537</b> | <b>2122.1456</b> | <b>1.1081</b>  | <b>2</b> | <b>2</b>  | <b>83</b>    | <b>10</b> | <b>R.EALMESKNLNIFTRTLVK.R</b>                                         |
| <a href="#">13543</a> | <b>841.9519</b>  | <b>2522.8337</b> | <b>2521.2754</b> | <b>1.5583</b>  | <b>1</b> | <b>28</b> | <b>0.2</b>   | <b>1</b>  | <b>K.VKNPLFDWYQYTPQPGLAQR.E</b> <a href="#">13551</a>                 |

## Proteins matching the same set of peptides:

[gi|220694810|gb|EED51154.1|](#) Mass: 70334 Score: 124 Queries matched: 27  
 aflK/ vbs/ VERB synthase [Aspergillus flavus NRRL3357]

217. [gi|220701100|gb|EED57438.1|](#) Mass: 173645 Score: 123 Queries matched: 22 emPAI: 0.02

glycogen debranching enzyme Gdbl, putative [Aspergillus flavus NRRL3357]

| Query                | Observed        | Mr(expt)         | Mr(calc)         | Delta         | Miss     | Score     | Expect         | Rank     | Peptide                                                   |
|----------------------|-----------------|------------------|------------------|---------------|----------|-----------|----------------|----------|-----------------------------------------------------------|
| <a href="#">169</a>  | 381.3331        | 760.6517         | 761.3854         | -0.7337       | 1        | 8         | 37             | 6        | R.RLEGCK.R                                                |
| <a href="#">496</a>  | 450.3536        | 898.6927         | 897.4742         | 1.2185        | 1        | 14        | 6.3            | 3        | K.YTRLMAK.Y <a href="#">484</a> <a href="#">495</a>       |
| <a href="#">1266</a> | 542.0011        | 1081.9877        | 1080.5928        | 1.3950        | 0        | 9         | 20             | 4        | K.LVDLVHETR.L                                             |
| <a href="#">2360</a> | 634.3376        | 1266.6607        | 1263.6935        | 2.9672        | 1        | 3         | 70             | 8        | R.LPANEVTKQHK.S <a href="#">2354</a> <a href="#">2358</a> |
| <a href="#">2383</a> | <b>636.0746</b> | <b>1270.1347</b> | <b>1268.6547</b> | <b>1.4800</b> | <b>0</b> | <b>2</b>  | <b>99</b>      | <b>2</b> | <b>K.HGMIPNLLSSGK.L</b>                                   |
| <a href="#">2509</a> | 428.7005        | 1283.0797        | 1282.6670        | 0.4127        | 0        | 10        | 15             | 3        | K.TPTHYIDIAPR.L                                           |
| <a href="#">2951</a> | <b>667.4071</b> | <b>1332.7997</b> | <b>1330.7092</b> | <b>2.0905</b> | <b>1</b> | <b>1</b>  | <b>1.3e+02</b> | <b>3</b> | <b>K.GELGSEGGIGSIKK.I</b>                                 |
| <a href="#">4169</a> | 734.6446        | 1467.2747        | 1464.6667        | 2.6080        | 0        | 8         | 26             | 3        | R.EAMQAWSTGELSR.L                                         |
| <a href="#">4312</a> | 742.1886        | 1482.3627        | 1480.6616        | 1.7011        | 0        | (6)       | 43             | 2        | R.EAMQAWSTGELSR.L                                         |
| <a href="#">5683</a> | <b>809.2951</b> | <b>1616.5757</b> | <b>1615.9185</b> | <b>0.6572</b> | <b>0</b> | <b>93</b> | <b>7.9e-08</b> | <b>1</b> | <b>R.DLPLNALSIFSVISK.F</b> <a href="#">5678</a>           |
| <a href="#">6223</a> | 554.0625        | 1659.1657        | 1657.9304        | 1.2353        | 1        | 6         | 41             | 7        | K.FNAVRELPFLLPR.Y                                         |
| <a href="#">7278</a> | 582.7869        | 1745.3387        | 1742.9349        | 2.4038        | 1        | 1         | 1.2e+02        | 5        | K.TADDLIVVMNVLRR.V                                        |

|                       |           |           |           |         |   |   |         |    |                                    |
|-----------------------|-----------|-----------|-----------|---------|---|---|---------|----|------------------------------------|
| <a href="#">7602</a>  | 889.2576  | 1776.5007 | 1777.8417 | -1.3410 | 2 | 1 | 1.2e+02 | 6  | K.MGESEKAGNKGFPGTPR.D              |
| <a href="#">9341</a>  | 655.5052  | 1963.4937 | 1962.0588 | 1.4349  | 1 | 2 | 92      | 5  | R.RVPSLAAGLPHFAVDWAR.C             |
| <a href="#">10152</a> | 686.0632  | 2055.1677 | 2056.0490 | -0.8813 | 1 | 2 | 94      | 10 | R.EGSLWVNIPEDRKPFNR.S              |
| <a href="#">12190</a> | 778.7949  | 2333.3627 | 2335.1848 | -1.8221 | 2 | 3 | 60      | 10 | R.GIYKDLYKSGKPYEDYQLR.S            |
| <a href="#">16390</a> | 1158.2789 | 3471.8147 | 3472.6908 | -0.8760 | 2 | 0 | 80      | 10 | R.LMAKYFSGFRIDNCHSTPLGVAEYLLDEAR.K |

218. [gi|46370639|gb|AAS90106.1|](#) Mass: 70397 Score: 123 Queries matched: 23 emPAI: 0.15

VBS [Aspergillus flavus]

| Query                 | Observed  | Mr(expt)  | Mr(calc)  | Delta   | Miss | Score | Expect | Rank | Peptide                                         |
|-----------------------|-----------|-----------|-----------|---------|------|-------|--------|------|-------------------------------------------------|
| <a href="#">314</a>   | 421.0041  | 839.9937  | 840.5545  | -0.5608 | 1    | 7     | 28     | 9    | R.VLGVKGLR.V                                    |
| <a href="#">1025</a>  | 518.9821  | 1035.9497 | 1034.5066 | 1.4431  | 0    | 4     | 64     | 6    | R.EIVASDVMR.E                                   |
| <a href="#">1191</a>  | 535.2076  | 1068.4007 | 1067.6927 | 0.7080  | 2    | 10    | 16     | 6    | K.ARVLGVKGLR.V                                  |
| <a href="#">1575</a>  | 1134.9860 | 1133.9787 | 1133.5564 | 0.4223  | 1    | 12    | 9.3    | 1    | K.ADDSKAVVDSK.A                                 |
| <a href="#">2160</a>  | 623.2131  | 1244.4117 | 1244.5819 | -0.1702 | 0    | 3     | 79     | 1    | K.VESHSQLMGNK.E                                 |
| <a href="#">2584</a>  | 646.6121  | 1291.2097 | 1289.7204 | 1.4893  | 1    | 13    | 8.5    | 4    | K.DHLDRLGIPVR.S <a href="#">2576</a>            |
| <a href="#">2750</a>  | 656.0041  | 1309.9937 | 1308.6245 | 1.3693  | 1    | 12    | 9.7    | 1    | R.DQEMAVAAFRR.C                                 |
| <a href="#">2873</a>  | 663.8056  | 1325.5967 | 1325.7377 | -0.1410 | 0    | (11)  | 14     | 5    | R.SPQLLMVSGIGPK.D                               |
| <a href="#">3013</a>  | 670.7451  | 1339.4757 | 1340.8140 | -1.3383 | 2    | 2     | 95     | 8    | K.AVVDSKARVLGVK.G                               |
| <a href="#">3044</a>  | 672.1071  | 1342.1997 | 1341.7326 | 0.4671  | 0    | 40    | 0.017  | 1    | R.SPQLLMVSGIGPK.D <a href="#">3056</a>          |
| <a href="#">4163</a>  | 489.6049  | 1465.7927 | 1464.7361 | 1.0566  | 0    | 12    | 9.2    | 1    | R.SYITHITINPYTR.R                               |
| <a href="#">5589</a>  | 537.6929  | 1610.0567 | 1608.7613 | 1.2954  | 2    | 4     | 67     | 7    | R.DQEMAVAAFRRCR.E                               |
| <a href="#">6130</a>  | 826.8116  | 1651.6087 | 1650.8035 | 0.8052  | 0    | 13    | 7.1    | 2    | R.EALMESNNLNIFTR.T                              |
| <a href="#">6782</a>  | 850.7426  | 1699.4707 | 1698.8253 | 0.6454  | 0    | 79    | 2e-06  | 1    | K.GLLTNPQDYFAFEK.H <a href="#">6778</a>         |
| <a href="#">7064</a>  | 575.5309  | 1723.5707 | 1721.7905 | 1.7802  | 0    | 4     | 60     | 10   | K.NYFMSAALMTPFSSR.G                             |
| <a href="#">10901</a> | 718.5989  | 2152.7747 | 2153.0899 | -0.3151 | 1    | 4     | 45     | 3    | K.VESHSQLMGNKETLPOAIR.E <a href="#">10912</a>   |
| <a href="#">13543</a> | 841.9519  | 2522.8337 | 2521.2754 | 1.5583  | 1    | 28    | 0.2    | 1    | R.VKNPLFDWYQYTTTPQPLAQR.E <a href="#">13551</a> |
| <a href="#">14217</a> | 883.4865  | 2647.4377 | 2645.2755 | 2.1623  | 1    | 2     | 70     | 1    | R.ETASSSYLREALMESNNLNIFTR.T                     |

219. [gi|220690598|gb|EED46947.1|](#) Mass: 23086 Score: 122 Queries matched: 21 emPAI: 0.72

ribosomal protein L16a [Aspergillus flavus NRRL3357]

| Query                | Observed | Mr(expt)  | Mr(calc)  | Delta   | Miss | Score | Expect  | Rank | Peptide                                                                  |
|----------------------|----------|-----------|-----------|---------|------|-------|---------|------|--------------------------------------------------------------------------|
| <a href="#">87</a>   | 705.5500 | 704.5427  | 704.3275  | 0.2152  | 0    | 13    | 9.7     | 2    | R.GAAAMER.L                                                              |
| <a href="#">267</a>  | 409.5461 | 817.0777  | 816.4031  | 0.6746  | 0    | 36    | 0.057   | 1    | R.GGPFHFR.A <a href="#">268</a>                                          |
| <a href="#">450</a>  | 441.7731 | 881.5317  | 880.5494  | 0.9823  | 0    | 48    | 0.002   | 1    | R.VVVPQALR.V <a href="#">447</a> <a href="#">448</a> <a href="#">449</a> |
| <a href="#">2203</a> | 625.3141 | 1248.6137 | 1246.6234 | 1.9903  | 0    | 13    | 9.3     | 1    | K.VFEGVPPPYDK.K <a href="#">2197</a>                                     |
| <a href="#">2557</a> | 645.2321 | 1288.4497 | 1289.6874 | -1.2376 | 2    | 2     | 1e+02   | 10   | K.TARGAAAMERLK.V                                                         |
| <a href="#">3215</a> | 681.1271 | 1360.2397 | 1360.6908 | -0.4511 | 0    | 4     | 72      | 7    | -.MSSTEPVVVIDGK.G                                                        |
| <a href="#">3390</a> | 688.6721 | 1375.3297 | 1374.7184 | 0.6114  | 1    | 42    | 0.011   | 1    | K.VFEGVPPPYDKK.K <a href="#">3399</a>                                    |
| <a href="#">3841</a> | 716.2496 | 1430.4847 | 1431.7160 | -1.2313 | 1    | 1     | 1.3e+02 | 9    | R.FNPTRGGPFHFR.A                                                         |

|                       |                          |                           |                           |                         |                   |                    |                         |                   |                                         |                      |
|-----------------------|--------------------------|---------------------------|---------------------------|-------------------------|-------------------|--------------------|-------------------------|-------------------|-----------------------------------------|----------------------|
| <a href="#">3960</a>  | <a href="#">722.6921</a> | <a href="#">1443.3697</a> | <a href="#">1441.6660</a> | <a href="#">1.7037</a>  | <a href="#">0</a> | <a href="#">58</a> | <a href="#">0.00025</a> | <a href="#">1</a> | <a href="#">R.CEALNISGEFFR.A</a>        | <a href="#">3966</a> |
| <a href="#">4489</a>  | <a href="#">502.6169</a> | <a href="#">1504.8287</a> | <a href="#">1502.8133</a> | <a href="#">2.0154</a>  | <a href="#">2</a> | <a href="#">8</a>  | <a href="#">28</a>      | <a href="#">4</a> | <a href="#">K.VFEGVPPPYDKKK.R</a>       | <a href="#">4488</a> |
| <a href="#">7100</a>  | <a href="#">576.8459</a> | <a href="#">1727.5157</a> | <a href="#">1727.8559</a> | <a href="#">-0.3402</a> | <a href="#">2</a> | <a href="#">2</a>  | <a href="#">89</a>      | <a href="#">7</a> | <a href="#">R.GMIPHKTARGAAAMER.L</a>    |                      |
| <a href="#">9700</a>  | <a href="#">670.4549</a> | <a href="#">2008.3427</a> | <a href="#">2010.0568</a> | <a href="#">-1.7141</a> | <a href="#">1</a> | <a href="#">4</a>  | <a href="#">51</a>      | <a href="#">2</a> | <a href="#">-.MSSTEPVVVIDGKGHLLGR.L</a> |                      |
| <a href="#">11210</a> | <a href="#">732.0455</a> | <a href="#">2193.1147</a> | <a href="#">2190.1143</a> | <a href="#">3.0004</a>  | <a href="#">2</a> | <a href="#">0</a>  | <a href="#">1.3e+02</a> | <a href="#">3</a> | <a href="#">R.GAAAMERLKVFEVPPPYDK.K</a> |                      |

220. [gi|220698656|gb|EED54996.1|](#) Mass: 39682 Score: 122 Queries matched: 9 emPAI: 0.17

26S proteasome regulatory particle subunit Rpn8, putative [Aspergillus flavus NRRL3357]

| Query                | Observed                 | Mr(expt)                  | Mr(calc)                  | Delta                  | Miss              | Score              | Expect                  | Rank              | Peptide                                |                                           |
|----------------------|--------------------------|---------------------------|---------------------------|------------------------|-------------------|--------------------|-------------------------|-------------------|----------------------------------------|-------------------------------------------|
| <a href="#">3071</a> | <a href="#">673.8221</a> | <a href="#">1345.6297</a> | <a href="#">1344.7249</a> | <a href="#">0.9048</a> | <a href="#">0</a> | <a href="#">79</a> | <a href="#">2.2e-06</a> | <a href="#">1</a> | <a href="#">M.PATTADTSLVTR.T</a>       |                                           |
| <a href="#">6384</a> | <a href="#">836.4571</a> | <a href="#">1670.8997</a> | <a href="#">1670.7972</a> | <a href="#">0.1025</a> | <a href="#">1</a> | <a href="#">6</a>  | <a href="#">41</a>      | <a href="#">1</a> | <a href="#">K.IQNRQQEENEQK.R</a>       |                                           |
| <a href="#">6744</a> | <a href="#">849.1661</a> | <a href="#">1696.3177</a> | <a href="#">1694.9607</a> | <a href="#">1.3570</a> | <a href="#">0</a> | <a href="#">73</a> | <a href="#">6.7e-06</a> | <a href="#">1</a> | <a href="#">R.YTPNPLLVIVDVQPK.E</a>    | <a href="#">6737</a> <a href="#">6743</a> |
| <a href="#">7342</a> | <a href="#">877.8046</a> | <a href="#">1753.5947</a> | <a href="#">1752.9080</a> | <a href="#">0.6867</a> | <a href="#">0</a> | <a href="#">0</a>  | <a href="#">1.3e+02</a> | <a href="#">4</a> | <a href="#">K.TNDQLMAIYLSLIR.A</a>     |                                           |
| <a href="#">8626</a> | <a href="#">942.7201</a> | <a href="#">1883.4257</a> | <a href="#">1882.0061</a> | <a href="#">1.4197</a> | <a href="#">1</a> | <a href="#">3</a>  | <a href="#">74</a>      | <a href="#">8</a> | <a href="#">R.AITAFHDLIENKIQR.Q</a>    |                                           |
| <a href="#">8927</a> | <a href="#">638.3085</a> | <a href="#">1911.9037</a> | <a href="#">1910.0626</a> | <a href="#">1.8412</a> | <a href="#">0</a> | <a href="#">8</a>  | <a href="#">21</a>      | <a href="#">1</a> | <a href="#">R.TVTVAPLVLLSVADHYGR.S</a> | <a href="#">8926</a>                      |

221. [gi|220690852|gb|EED47201.1|](#) Mass: 83225 Score: 122 Queries matched: 10 emPAI: 0.04

threonyl-tRNA synthetase, putative [Aspergillus flavus NRRL3357]

| Query                 | Observed                 | Mr(expt)                  | Mr(calc)                  | Delta                   | Miss              | Score              | Expect                  | Rank               | Peptide                                  |                       |
|-----------------------|--------------------------|---------------------------|---------------------------|-------------------------|-------------------|--------------------|-------------------------|--------------------|------------------------------------------|-----------------------|
| <a href="#">208</a>   | <a href="#">393.6011</a> | <a href="#">785.1877</a>  | <a href="#">785.3668</a>  | <a href="#">-0.1791</a> | <a href="#">0</a> | <a href="#">4</a>  | <a href="#">72</a>      | <a href="#">4</a>  | <a href="#">K.SSEPGPGR.A</a>             |                       |
| <a href="#">1218</a>  | <a href="#">537.4066</a> | <a href="#">1072.7987</a> | <a href="#">1071.6176</a> | <a href="#">1.1812</a>  | <a href="#">0</a> | <a href="#">5</a>  | <a href="#">60</a>      | <a href="#">10</a> | <a href="#">K.IDITIADALK.R</a>           |                       |
| <a href="#">1839</a>  | <a href="#">595.1011</a> | <a href="#">1188.1877</a> | <a href="#">1187.7026</a> | <a href="#">0.4851</a>  | <a href="#">0</a> | <a href="#">82</a> | <a href="#">1.2e-06</a> | <a href="#">1</a>  | <a href="#">K.IFNALQTLR.S</a>            | <a href="#">1842</a>  |
| <a href="#">2270</a>  | <a href="#">629.9876</a> | <a href="#">1257.9607</a> | <a href="#">1257.6387</a> | <a href="#">0.3220</a>  | <a href="#">0</a> | <a href="#">16</a> | <a href="#">4.5</a>     | <a href="#">1</a>  | <a href="#">K.QGVMIPLEEAR.E</a>          |                       |
| <a href="#">7580</a>  | <a href="#">888.2361</a> | <a href="#">1774.4577</a> | <a href="#">1774.8559</a> | <a href="#">-0.3982</a> | <a href="#">1</a> | <a href="#">2</a>  | <a href="#">1e+02</a>   | <a href="#">3</a>  | <a href="#">K.QMQEHLKFLLEAEK.R</a>       |                       |
| <a href="#">7713</a>  | <a href="#">893.2786</a> | <a href="#">1784.5427</a> | <a href="#">1783.9614</a> | <a href="#">0.5813</a>  | <a href="#">2</a> | <a href="#">10</a> | <a href="#">13</a>      | <a href="#">2</a>  | <a href="#">K.QGVMIPLEEAREKLR.A</a>      |                       |
| <a href="#">10032</a> | <a href="#">681.6959</a> | <a href="#">2042.0657</a> | <a href="#">2041.1221</a> | <a href="#">0.9436</a>  | <a href="#">2</a> | <a href="#">4</a>  | <a href="#">48</a>      | <a href="#">6</a>  | <a href="#">R.SYRELPLRLADFGVLHR.N</a>    |                       |
| <a href="#">11865</a> | <a href="#">764.0939</a> | <a href="#">2289.2597</a> | <a href="#">2289.0332</a> | <a href="#">0.2266</a>  | <a href="#">0</a> | <a href="#">3</a>  | <a href="#">71</a>      | <a href="#">10</a> | <a href="#">K.IMQNSSAYFLGDQSNDSLQR.I</a> | <a href="#">11863</a> |

222. [gi|220700991|gb|EED57329.1|](#) Mass: 17658 Score: 121 Queries matched: 8 emPAI: 0.19

ATP synthase delta chain, mitochondrial precursor, putative [Aspergillus flavus NRRL3357]

| Query                | Observed                 | Mr(expt)                  | Mr(calc)                  | Delta                   | Miss              | Score               | Expect                  | Rank              | Peptide                             |                                           |
|----------------------|--------------------------|---------------------------|---------------------------|-------------------------|-------------------|---------------------|-------------------------|-------------------|-------------------------------------|-------------------------------------------|
| <a href="#">2317</a> | <a href="#">632.5626</a> | <a href="#">1263.1107</a> | <a href="#">1262.7207</a> | <a href="#">0.3900</a>  | <a href="#">2</a> | <a href="#">5</a>   | <a href="#">47</a>      | <a href="#">8</a> | <a href="#">M.SSLRFARSALR.A</a>     | <a href="#">2324</a>                      |
| <a href="#">3548</a> | <a href="#">697.8546</a> | <a href="#">1393.6947</a> | <a href="#">1393.7612</a> | <a href="#">-0.0665</a> | <a href="#">2</a> | <a href="#">5</a>   | <a href="#">56</a>      | <a href="#">4</a> | <a href="#">-.MSSLRFARSALR.A</a>    |                                           |
| <a href="#">3683</a> | <a href="#">706.8776</a> | <a href="#">1411.7407</a> | <a href="#">1409.7561</a> | <a href="#">1.9846</a>  | <a href="#">2</a> | <a href="#">(1)</a> | <a href="#">1.3e+02</a> | <a href="#">5</a> | <a href="#">-.MSSLRFARSALR.A</a>    |                                           |
| <a href="#">4129</a> | <a href="#">732.0531</a> | <a href="#">1462.0917</a> | <a href="#">1461.6947</a> | <a href="#">0.3970</a>  | <a href="#">0</a> | <a href="#">121</a> | <a href="#">1.4e-10</a> | <a href="#">1</a> | <a href="#">K.IASGSGSEQDIAEAK.I</a> |                                           |
| <a href="#">5918</a> | <a href="#">819.1936</a> | <a href="#">1636.3727</a> | <a href="#">1634.9243</a> | <a href="#">1.4484</a>  | <a href="#">0</a> | <a href="#">9</a>   | <a href="#">20</a>      | <a href="#">1</a> | <a href="#">K.IELEVLETQAHLK.-</a>   | <a href="#">5913</a> <a href="#">5931</a> |

223. [gi|220697392|gb|EED53733.1|](#) Mass: 38055 Score: 120 Queries matched: 17 emPAI: 0.40

mitochondrial peroxiredoxin Prx1, putative [Aspergillus flavus NRRL3357]

| Query                 | Observed  | Mr(expt)  | Mr(calc)  | Delta   | Miss | Score | Expect  | Rank | Peptide                                                  |
|-----------------------|-----------|-----------|-----------|---------|------|-------|---------|------|----------------------------------------------------------|
| <a href="#">1006</a>  | 517.2441  | 1032.4737 | 1031.5651 | 0.9086  | 0    | 5     | 55      | 4    | R.SVFIIDPNK.K                                            |
| <a href="#">1310</a>  | 545.6966  | 1089.3787 | 1088.5714 | 0.8074  | 0    | 61    | 0.00016 | 1    | R.VVDALQTTDK.H                                           |
| <a href="#">1311</a>  | 545.7766  | 1089.5387 | 1088.5574 | 0.9813  | 1    | 10    | 20      | 3    | R.RNSDETIVIR.R                                           |
| <a href="#">1707</a>  | 581.2011  | 1160.3877 | 1159.6601 | 0.7276  | 1    | 39    | 0.025   | 1    | R.SVFIIDPNKK.I <a href="#">1704</a>                      |
| <a href="#">1875</a>  | 598.6936  | 1195.3727 | 1194.6067 | 0.7661  | 0    | (23)  | 0.81    | 1    | R.LIMSYPASTGR.N                                          |
| <a href="#">1953</a>  | 606.6601  | 1211.3057 | 1210.6016 | 0.7041  | 0    | 48    | 0.0021  | 1    | R.LIMSYPASTGR.N <a href="#">1946</a>                     |
| <a href="#">2393</a>  | 636.7241  | 1271.4337 | 1270.6921 | 0.7416  | 0    | 59    | 0.00021 | 1    | K.LTFPIIADPER.K <a href="#">2401</a>                     |
| <a href="#">3611</a>  | 701.2656  | 1400.5167 | 1398.7871 | 1.7296  | 1    | 25    | 0.46    | 1    | K.LTFPIIADPERK.V                                         |
| <a href="#">5554</a>  | 536.7859  | 1607.3357 | 1607.8817 | -0.5460 | 2    | 2     | 94      | 5    | K.KIRLIMSYPASTGR.N                                       |
| <a href="#">9608</a>  | 666.1075  | 1995.3007 | 1994.0255 | 1.2752  | 1    | 10    | 15      | 5    | R.LIMSYPASTGRNTAEVLR.V <a href="#">9591</a>              |
| <a href="#">11249</a> | 1100.3191 | 2198.6237 | 2196.9521 | 1.6716  | 0    | 15    | 4.4     | 1    | K.VAYAYDMVDYQDTTNVDSK.G                                  |
| <a href="#">15422</a> | 995.6632  | 2983.9677 | 2981.5135 | 2.4542  | 0    | 20    | 0.92    | 1    | K.HGVTTTPINWLPGDDVVI PPPVSTEDAQK.K <a href="#">15423</a> |

224. [gi|220690860|gb|EED47209.1|](#) Mass: 24585 Score: 120 Queries matched: 9 emPAI: 0.29

NADH-ubiquinone oxidoreductase 213 kDa subunit [Aspergillus flavus NRRL3357]

| Query                 | Observed  | Mr(expt)  | Mr(calc)  | Delta   | Miss | Score | Expect  | Rank | Peptide                                                                             |
|-----------------------|-----------|-----------|-----------|---------|------|-------|---------|------|-------------------------------------------------------------------------------------|
| <a href="#">3994</a>  | 724.1981  | 1446.3817 | 1446.6950 | -0.3133 | 0    | 90    | 1.4e-07 | 1    | R.TSGEQTLAELGEGR.G <a href="#">4026</a>                                             |
| <a href="#">7319</a>  | 584.5549  | 1750.6427 | 1749.7475 | 0.8952  | 0    | 10    | 13      | 2    | -.MAETATSQNPSEPSER.L <a href="#">7317</a> <a href="#">7322</a> <a href="#">7323</a> |
| <a href="#">8897</a>  | 955.2041  | 1908.3937 | 1906.9135 | 1.4802  | 0    | 1     | 1.1e+02 | 5    | R.SGGTIGVFAAMGGTYEFVK.T                                                             |
| <a href="#">10778</a> | 1070.1651 | 2138.3157 | 2137.1202 | 1.1956  | 0    | 57    | 0.00025 | 1    | K.TTMLTGGVGLFASAVQNTLTR.K <a href="#">10760</a>                                     |

225. [gi|220697217|gb|EED53558.1|](#) Mass: 76932 Score: 119 Queries matched: 16 emPAI: 0.13

NADPH cytochrome P450 reductase (CprA), putative [Aspergillus flavus NRRL3357]

| Query                 | Observed  | Mr(expt)  | Mr(calc)  | Delta   | Miss | Score | Expect  | Rank | Peptide                                                               |
|-----------------------|-----------|-----------|-----------|---------|------|-------|---------|------|-----------------------------------------------------------------------|
| <a href="#">1443</a>  | 558.6411  | 1115.2677 | 1115.5216 | -0.2538 | 1    | 8     | 29      | 6    | K.GEEMVKHMR.S                                                         |
| <a href="#">1520</a>  | 564.8341  | 1127.6537 | 1129.6455 | -1.9918 | 2    | 6     | 41      | 2    | K.AGKTRDILEK.M                                                        |
| <a href="#">2253</a>  | 629.2391  | 1256.4637 | 1255.6384 | 0.8254  | 0    | 11    | 14      | 1    | K.VGTTVLFVFGCR.N                                                      |
| <a href="#">3986</a>  | 723.8486  | 1445.6827 | 1446.6303 | -0.9476 | 0    | 5     | 44      | 5    | R.NEDFLYQDEFK.A <a href="#">3993</a>                                  |
| <a href="#">4440</a>  | 751.1881  | 1500.3617 | 1499.7984 | 0.5633  | 0    | 28    | 0.24    | 1    | K.VPIPTPTTYDAAVR.Y <a href="#">4450</a>                               |
| <a href="#">5531</a>  | 536.1492  | 1605.4257 | 1603.8093 | 1.6164  | 1    | 5     | 45      | 3    | R.YYSISSSSLVQKDK.I                                                    |
| <a href="#">6507</a>  | 841.0136  | 1680.0127 | 1680.8359 | -0.8232 | 0    | 0     | 1.3e+02 | 4    | R.QFVSSLAAPDEATK.T                                                    |
| <a href="#">8396</a>  | 928.7056  | 1855.3967 | 1854.8523 | 0.5444  | 0    | 8     | 23      | 3    | R.EAVYEPVFNVTEDESK.S                                                  |
| <a href="#">11628</a> | 1128.8761 | 2255.7377 | 2254.9688 | 0.7689  | 0    | 115   | 4e-10   | 1    | R.IGSAGEGDDGAGTMEEDFLAWK.E                                            |
| <a href="#">11679</a> | 755.7289  | 2264.1647 | 2263.2147 | 0.9500  | 0    | 17    | 2.3     | 1    | K.LPSDPSRPIIMVPGTGVAPFR.G <a href="#">11680</a> <a href="#">11682</a> |
| <a href="#">11755</a> | 760.3605  | 2278.0597 | 2279.2096 | -1.1499 | 0    | (6)   | 33      | 7    | K.LPSDPSRPIIMVPGTGVAPFR.G                                             |
| <a href="#">14453</a> | 894.1232  | 2679.3477 | 2678.4969 | 0.8509  | 0    | 4     | 50      | 6    | -.MAQLDTLDLVVLVALLVGSVAYFTK.G                                         |

226. [gi|220691248|gb|EED47596.1|](#) Mass: 90839 Score: 118 Queries matched: 33 emPAI: 0.11

cell division control protein Cdc48 [Aspergillus flavus NRRL3357]

| Query                 | Observed | Mr(expt)  | Mr(calc)  | Delta   | Miss | Score | Expect  | Rank | Peptide                                                               |
|-----------------------|----------|-----------|-----------|---------|------|-------|---------|------|-----------------------------------------------------------------------|
| <a href="#">277</a>   | 822.9160 | 821.9087  | 822.3759  | -0.4672 | 0    | 2     | 95      | 5    | K.AFEEAEK.N                                                           |
| <a href="#">402</a>   | 433.0456 | 864.0767  | 863.4501  | 0.6266  | 1    | 11    | 13      | 9    | R.DIFDKAR.A                                                           |
| <a href="#">1336</a>  | 548.4836 | 1094.9527 | 1092.4869 | 2.4658  | 0    | 8     | 21      | 7    | K.MAGESESNLR.K <a href="#">1327</a>                                   |
| <a href="#">1937</a>  | 605.1206 | 1208.2267 | 1205.6115 | 2.6153  | 0    | 9     | 18      | 4    | R.GILMYGPPGTGK.T <a href="#">1936</a>                                 |
| <a href="#">2199</a>  | 625.2201 | 1248.4257 | 1246.6670 | 1.7588  | 0    | 37    | 0.03    | 1    | R.YALGVSNPSALR.E <a href="#">2174</a>                                 |
| <a href="#">3839</a>  | 716.2076 | 1430.4007 | 1429.7201 | 0.6806  | 1    | 1     | 1.3e+02 | 5    | R.WEDIGGLEEVKR.E                                                      |
| <a href="#">4047</a>  | 484.9229 | 1451.7467 | 1449.7571 | 1.9896  | 0    | 5     | 44      | 9    | R.VVSQLLTLMGDK.A                                                      |
| <a href="#">4109</a>  | 487.6112 | 1459.8117 | 1461.7146 | -1.9029 | 2    | 10    | 18      | 4    | R.AHFEEAMKTARR.S                                                      |
| <a href="#">4463</a>  | 501.7009 | 1502.0807 | 1500.7792 | 1.3015  | 1    | 2     | 1.1e+02 | 10   | R.LEIMQIHTKNMK.L                                                      |
| <a href="#">5353</a>  | 795.9661 | 1589.9177 | 1589.8633 | 0.0544  | 1    | 19    | 2       | 1    | R.RVVSQLLTLMGDK.A                                                     |
| <a href="#">6561</a>  | 841.9141 | 1681.8137 | 1680.8063 | 1.0075  | 0    | 0     | 1.4e+02 | 2    | R.VVNQLLTEMGDKT.K                                                     |
| <a href="#">6629</a>  | 844.4026 | 1686.7907 | 1685.8988 | 0.8919  | 0    | 4     | 53      | 1    | R.LDTLVYVPLPDQASR.E                                                   |
| <a href="#">8084</a>  | 911.1716 | 1820.3287 | 1817.9233 | 2.4054  | 0    | 44    | 0.0057  | 1    | R.AAAPCVVFLDELDSIAK.S <a href="#">8063</a> <a href="#">8078</a>       |
| <a href="#">8275</a>  | 922.8376 | 1843.6607 | 1841.9774 | 1.6833  | 0    | 98    | 2.2e-08 | 1    | K.NSPAIIIFIDEIDSIAPK.R <a href="#">8253</a> <a href="#">8256</a>      |
| <a href="#">8356</a>  | 618.2785 | 1851.8137 | 1848.9914 | 2.8224  | 2    | 0     | 1.3e+02 | 6    | R.RVVSQLLTLMGDKAR.S                                                   |
| <a href="#">9606</a>  | 666.1019 | 1995.2837 | 1994.9486 | 0.3351  | 1    | 1     | 1.1e+02 | 4    | R.YEAFASLKNSSGSSFFR.F                                                 |
| <a href="#">10081</a> | 683.2182 | 2046.6327 | 2046.0283 | 0.6044  | 2    | 4     | 54      | 4    | R.FGRFDREVDIGIPDPTGR.L                                                |
| <a href="#">10885</a> | 717.2829 | 2148.8267 | 2145.8896 | 2.9372  | 0    | 5     | 40      | 5    | K.MDEDEEVDEEDPVPELTR.A <a href="#">10884</a>                          |
| <a href="#">11627</a> | 752.8425 | 2255.5057 | 2255.2161 | 0.2896  | 2    | 2     | 78      | 4    | K.NSPAIIIFIDEIDSIAPKREK.T <a href="#">11617</a> <a href="#">11623</a> |
| <a href="#">12084</a> | 773.4669 | 2317.3787 | 2315.2750 | 2.1037  | 2    | 4     | 50      | 2    | K.THGFSGADLGFVTQRAVKLAIK.Q                                            |
| <a href="#">13325</a> | 833.7012 | 2498.0817 | 2496.3199 | 1.7618  | 2    | 3     | 53      | 1    | K.FGLSPSRGVLFYGPPTGKTLAK.A                                            |
| <a href="#">14181</a> | 881.2605 | 2640.7597 | 2642.4400 | -1.6803 | 2    | 0     | 1.1e+02 | 6    | K.SIGIKPPRGILMYGPPGTGKTLMAR.A                                         |
| <a href="#">14883</a> | 926.0742 | 2775.2007 | 2774.4378 | 0.7630  | 2    | 5     | 32      | 2    | R.KAFEEAEKNSPAIIIFIDEIDSIAPK.R                                        |

227. [gi|45477378|gb|AY371490.1|\\_f](#) Mass: 3003861 Score: 118 Queries matched: 322 emPAI: 0.00

Aspergillus parasiticus aflatoxin pathway gene cluster, complete sequence

| Query               | Observed | Mr(expt) | Mr(calc) | Delta   | Miss | Score | Expect | Rank | Peptide                         |
|---------------------|----------|----------|----------|---------|------|-------|--------|------|---------------------------------|
| <a href="#">134</a> | 743.5380 | 742.5307 | 742.3973 | 0.1334  | 0    | 9     | 24     | 1    | K.AEPIASR.N                     |
| <a href="#">162</a> | 757.6070 | 756.5997 | 756.4718 | 0.1279  | 2    | 17    | 3.5    | 2    | R.RKANLR.V                      |
| <a href="#">184</a> | 772.2110 | 771.2037 | 772.4807 | -1.2769 | 0    | 11    | 13     | 6    | R.TISLALR.K                     |
| <a href="#">219</a> | 789.6330 | 788.6257 | 788.4504 | 0.1753  | 1    | 7     | 43     | 8    | K.RANTTVK.H                     |
| <a href="#">231</a> | 400.5331 | 799.0517 | 798.4283 | 0.6235  | 1    | 14    | 6      | 3    | K.HLMSRR.Y                      |
| <a href="#">235</a> | 802.4770 | 801.4697 | 800.4980 | 0.9717  | 2    | 6     | 62     | 1    | R.AKSALRR.L <a href="#">236</a> |
| <a href="#">354</a> | 426.6781 | 851.3417 | 851.3960 | -0.0542 | 0    | 7     | 30     | 1    | R.APCSYVR.S                     |
| <a href="#">420</a> | 872.5690 | 871.5617 | 871.4949 | 0.0668  | 1    | 9     | 25     | 9    | K.KDLMIPR.R                     |
| <a href="#">440</a> | 439.8106 | 877.6067 | 879.4120 | -1.8053 | 0    | 9     | 23     | 4    | K.STSMVSPR.W                    |
| <a href="#">455</a> | 441.9846 | 881.9547 | 882.5287 | -0.5740 | 0    | 8     | 21     | 10   | K.LLGPSIQR.V                    |

|                      |           |           |           |         |   |     |         |    |                                      |
|----------------------|-----------|-----------|-----------|---------|---|-----|---------|----|--------------------------------------|
| <a href="#">475</a>  | 891.8930  | 890.8857  | 890.5086  | 0.3771  | 1 | 0   | 1.8e+02 | 10 | R.TLFQARR.S                          |
| <a href="#">598</a>  | 463.9856  | 925.9567  | 926.4934  | -0.5366 | 1 | 4   | 54      | 6  | R.DAKLHSTR.R                         |
| <a href="#">604</a>  | 927.3700  | 926.3627  | 925.5094  | 0.8534  | 1 | 10  | 15      | 3  | R.ANTTVKHR.S                         |
| <a href="#">615</a>  | 466.6291  | 931.2437  | 931.4975  | -0.2537 | 0 | 17  | 4.3     | 2  | R.TDQTVLQK.I <a href="#">613</a>     |
| <a href="#">646</a>  | 474.5431  | 947.0717  | 944.5053  | 2.5665  | 2 | 9   | 26      | 5  | R.SRRSHFR.E <a href="#">644</a>      |
| <a href="#">671</a>  | 958.3960  | 957.3887  | 957.4630  | -0.0743 | 0 | 11  | 14      | 5  | R.SFTPFMTK.L                         |
| <a href="#">694</a>  | 961.9170  | 960.9097  | 959.5586  | 1.3511  | 1 | 7   | 44      | 9  | R.LATQMLKR.G                         |
| <a href="#">774</a>  | 977.6210  | 976.6137  | 976.4185  | 0.1952  | 0 | 19  | 2       | 3  | R.QVCHDYR.D <a href="#">771</a>      |
| <a href="#">777</a>  | 489.5991  | 977.1837  | 975.5396  | 1.6441  | 2 | 14  | 6.9     | 4  | R.SMISRARR.Q                         |
| <a href="#">778</a>  | 489.6051  | 977.1957  | 976.5375  | 0.6582  | 1 | 13  | 8.9     | 3  | R.ILQTCKSK.D <a href="#">785</a>     |
| <a href="#">805</a>  | 492.6636  | 983.3127  | 983.4607  | -0.1480 | 0 | 10  | 15      | 6  | R.NDAVLHCR.M                         |
| <a href="#">819</a>  | 494.0206  | 986.0267  | 983.5400  | 2.4867  | 0 | 16  | 4.7     | 3  | K.VSLPGDQLR.C                        |
| <a href="#">829</a>  | 494.3591  | 986.7037  | 987.5396  | -0.8359 | 2 | 1   | 1.7e+02 | 6  | R.RLPMRSGR.S                         |
| <a href="#">852</a>  | 992.5760  | 991.5687  | 991.5345  | 0.0342  | 2 | (2) | 1.1e+02 | 10 | R.SMISRARR.Q                         |
| <a href="#">879</a>  | 500.5621  | 999.1097  | 998.5509  | 0.5589  | 0 | 12  | 11      | 8  | R.LDLETRPR.E                         |
| <a href="#">929</a>  | 507.3851  | 1012.7557 | 1013.5869 | -0.8312 | 0 | 16  | 4.6     | 2  | R.NIVALTVER.I                        |
| <a href="#">991</a>  | 515.6721  | 1029.3297 | 1026.5611 | 2.7687  | 0 | 7   | 35      | 9  | R.FPSLSAHLR.R                        |
| <a href="#">1041</a> | 520.5516  | 1039.0887 | 1038.4843 | 0.6045  | 1 | 4   | 66      | 2  | R.SSSRSWSSR.D                        |
| <a href="#">1067</a> | 1046.5950 | 1045.5877 | 1043.6101 | 1.9776  | 1 | 4   | 79      | 1  | R.RGHGLIHVR.Y                        |
| <a href="#">1074</a> | 524.3736  | 1046.7327 | 1044.5539 | 2.1789  | 1 | 0   | 1.8e+02 | 2  | R.KVMPVHYR.I                         |
| <a href="#">1099</a> | 525.8601  | 1049.7057 | 1048.5050 | 1.2007  | 1 | 7   | 32      | 2  | R.RGNPTSDFR.Y                        |
| <a href="#">1102</a> | 526.5926  | 1051.1707 | 1050.6410 | 0.5297  | 2 | 6   | 44      | 4  | R.IKGARTLHR.A                        |
| <a href="#">1185</a> | 534.6666  | 1067.3187 | 1066.6386 | 0.6801  | 0 | 39  | 0.02    | 1  | K.EQAILVAVPK.R <a href="#">1186</a>  |
| <a href="#">1230</a> | 538.3631  | 1074.7117 | 1074.6774 | 0.0343  | 2 | 10  | 18      | 5  | R.RLGKVLHPR.R                        |
| <a href="#">1322</a> | 546.6921  | 1091.3697 | 1090.5077 | 0.8620  | 0 | 14  | 7.5     | 6  | R.GNGVMEIAER.G                       |
| <a href="#">1323</a> | 546.7546  | 1091.4947 | 1089.5535 | 1.9412  | 1 | 10  | 17      | 3  | R.MCANLLRGR.K                        |
| <a href="#">1333</a> | 548.1411  | 1094.2677 | 1094.5581 | -0.2904 | 1 | 15  | 5.1     | 5  | R.NSPAGTKHAGR.Y <a href="#">1338</a> |
| <a href="#">1345</a> | 1096.8880 | 1095.8807 | 1095.6077 | 0.2730  | 0 | 4   | 62      | 9  | K.SRPTLFTFK.S                        |
| <a href="#">1346</a> | 549.1011  | 1096.1877 | 1095.5052 | 0.6825  | 0 | 7   | 33      | 8  | R.MLNNAGTTMK.K                       |
| <a href="#">1380</a> | 552.9826  | 1103.9507 | 1105.5484 | -1.5977 | 1 | (2) | 1.1e+02 | 4  | R.MCANLLRGR.K                        |
| <a href="#">1390</a> | 554.0626  | 1106.1107 | 1106.6461 | -0.5354 | 2 | 6   | 42      | 9  | R.FRRAIAAFR.J                        |
| <a href="#">1435</a> | 557.7121  | 1113.4097 | 1111.5146 | 1.8952  | 0 | 1   | 1.4e+02 | 10 | R.GTVGSEFNSSK.R                      |
| <a href="#">1442</a> | 558.2096  | 1114.4047 | 1111.5002 | 2.9046  | 0 | (4) | 76      | 10 | R.MLNNAGTTMK.K                       |
| <a href="#">1451</a> | 559.1946  | 1116.3747 | 1116.6073 | -0.2326 | 1 | (7) | 36      | 5  | R.RAVTISMSPR.J                       |
| <a href="#">1453</a> | 559.4276  | 1116.8407 | 1118.5754 | -1.7346 | 0 | 1   | 1.6e+02 | 10 | R.MLAASNVLER.E                       |
| <a href="#">1494</a> | 562.4756  | 1122.9367 | 1120.5962 | 2.3405  | 2 | 10  | 15      | 3  | K.GTHRRQNPR.H                        |
| <a href="#">1496</a> | 562.6756  | 1123.3367 | 1122.5101 | 0.8266  | 0 | 6   | 42      | 3  | R.SSSRPCHRF                          |
| <a href="#">1574</a> | 378.9595  | 1133.8567 | 1132.6023 | 1.2545  | 1 | 11  | 12      | 6  | R.RAVTISMSPR.J <a href="#">1562</a>  |
| <a href="#">1581</a> | 1135.5350 | 1134.5277 | 1133.6267 | 0.9010  | 0 | 6   | 37      | 4  | R.APLLAVMTFR.F <a href="#">1594</a>  |
| <a href="#">1598</a> | 569.5571  | 1137.0997 | 1134.5743 | 2.5254  | 0 | 3   | 72      | 4  | K.DPFVLMLE.R                         |
| <a href="#">1599</a> | 569.6181  | 1137.2217 | 1134.6145 | 2.6072  | 1 | 4   | 66      | 2  | R.AETYIRINR.R                        |



|                      |                  |                  |                  |                |          |           |                |           |                                                                                       |
|----------------------|------------------|------------------|------------------|----------------|----------|-----------|----------------|-----------|---------------------------------------------------------------------------------------|
| <a href="#">1602</a> | 569.9046         | 1137.7947        | 1137.5713        | 0.2234         | 1        | 13        | 6.8            | 3         | K.GGIFSQRMSR.E                                                                        |
| <a href="#">1689</a> | 579.7991         | 1157.5837        | 1158.6067        | -1.0230        | 0        | 9         | 22             | 7         | K.EGLMVPVTAAR.C                                                                       |
| <a href="#">1718</a> | 582.6501         | 1163.2857        | 1163.5982        | -0.3125        | 2        | 1         | 1.2e+02        | 7         | R.SRQFRMPSR.T                                                                         |
| <a href="#">1761</a> | <b>586.6846</b>  | <b>1171.3547</b> | <b>1169.6404</b> | <b>1.7143</b>  | <b>0</b> | <b>18</b> | <b>2.8</b>     | <b>2</b>  | <b>R.LAAPESGIAVR.V</b>                                                                |
| <a href="#">1858</a> | 596.2056         | 1190.3967        | 1189.6779        | 0.7188         | 1        | 10        | 18             | 3         | R.STLITVGTRSR.S <a href="#">1854</a>                                                  |
| <a href="#">1859</a> | 596.4076         | 1190.8007        | 1189.6581        | 1.1426         | 1        | 4         | 66             | 8         | R.VPRHSWRPR.A                                                                         |
| <a href="#">1863</a> | <b>597.3511</b>  | <b>1192.6877</b> | <b>1192.6200</b> | <b>0.0677</b>  | <b>0</b> | <b>7</b>  | <b>33</b>      | <b>1</b>  | <b>R.NIIPLSEHDR.S</b>                                                                 |
| <a href="#">1905</a> | <b>601.4506</b>  | <b>1200.8867</b> | <b>1200.7342</b> | <b>0.1525</b>  | <b>1</b> | <b>3</b>  | <b>85</b>      | <b>7</b>  | <b>R.LRSAPYLLIR.Q</b>                                                                 |
| <a href="#">1916</a> | <b>603.2901</b>  | <b>1204.5657</b> | <b>1203.6935</b> | <b>0.8722</b>  | <b>2</b> | <b>3</b>  | <b>85</b>      | <b>2</b>  | <b>R.ISSKRANTTVK.H</b>                                                                |
| <a href="#">1938</a> | 605.2431         | 1208.4717        | 1208.6890        | -0.2173        | 2        | 2         | 87             | 5         | R.SHIRHYLKR.D                                                                         |
| <a href="#">1941</a> | <b>605.5966</b>  | <b>1209.1787</b> | <b>1206.7019</b> | <b>2.4768</b>  | <b>1</b> | <b>5</b>  | <b>49</b>      | <b>6</b>  | <b>R.HLLKQGMKPR.T</b> <a href="#">1939</a>                                            |
| <a href="#">1983</a> | 608.8161         | 1215.6177        | 1215.5997        | 0.0181         | 0        | 9         | 22             | 4         | K.LTFNGGHDTVR.N                                                                       |
| <a href="#">2053</a> | <b>615.2126</b>  | <b>1228.4107</b> | <b>1227.6618</b> | <b>0.7489</b>  | <b>2</b> | <b>11</b> | <b>13</b>      | <b>1</b>  | <b>R.QCGRRVSPLR.T</b>                                                                 |
| <a href="#">2067</a> | <b>616.3111</b>  | <b>1230.6077</b> | <b>1228.6524</b> | <b>1.9553</b>  | <b>1</b> | <b>5</b>  | <b>50</b>      | <b>4</b>  | <b>K.DAIESGVLGGRR.C</b>                                                               |
| <a href="#">2103</a> | <b>619.1626</b>  | <b>1236.3107</b> | <b>1235.5968</b> | <b>0.7139</b>  | <b>1</b> | <b>1</b>  | <b>1.4e+02</b> | <b>7</b>  | <b>R.EPNKTQFMGGK.L</b>                                                                |
| <a href="#">2246</a> | <b>628.4891</b>  | <b>1254.9637</b> | <b>1253.6438</b> | <b>1.3200</b>  | <b>1</b> | <b>2</b>  | <b>1e+02</b>   | <b>7</b>  | <b>R.NTERIYMSIK.S</b>                                                                 |
| <a href="#">2302</a> | <b>631.6306</b>  | <b>1261.2467</b> | <b>1262.6255</b> | <b>-1.3788</b> | <b>1</b> | <b>8</b>  | <b>30</b>      | <b>3</b>  | <b>R.DAEGDRNLVVK.A</b>                                                                |
| <a href="#">2343</a> | <b>633.7021</b>  | <b>1265.3897</b> | <b>1264.6775</b> | <b>0.7122</b>  | <b>2</b> | <b>16</b> | <b>3.7</b>     | <b>1</b>  | <b>K.KSISEYKTPGR.H</b>                                                                |
| <a href="#">2350</a> | 633.9521         | 1265.8897        | 1265.6914        | 0.1983         | 0        | 8         | 22             | 9         | R.MAISSIAHPLAR.Y                                                                      |
| <a href="#">2368</a> | 634.7976         | 1267.5807        | 1265.6476        | 1.9331         | 1        | 8         | 25             | 3         | K.YLQAGQTRSSR.F                                                                       |
| <a href="#">2405</a> | <b>1273.6000</b> | <b>1272.5927</b> | <b>1271.7197</b> | <b>0.8730</b>  | <b>2</b> | <b>11</b> | <b>15</b>      | <b>3</b>  | <b>R.KNRDDIVLATK.Y</b> <a href="#">2396</a> <a href="#">2397</a> <a href="#">2406</a> |
| <a href="#">2447</a> | 639.2606         | 1276.5067        | 1275.7147        | 0.7921         | 1        | 8         | 26             | 9         | R.TSVITITERTR.R                                                                       |
| <a href="#">2458</a> | 1277.6880        | 1276.6807        | 1276.6385        | 0.0423         | 2        | 2         | 1.1e+02        | 10        | K.EHRSQPPDRR.Q                                                                        |
| <a href="#">2459</a> | <b>639.3861</b>  | <b>1276.7577</b> | <b>1276.7979</b> | <b>-0.0402</b> | <b>2</b> | <b>17</b> | <b>3.6</b>     | <b>1</b>  | <b>K.KVKLIPQPQAR.V</b> <a href="#">2446</a> <a href="#">2466</a>                      |
| <a href="#">2474</a> | 640.0646         | 1278.1147        | 1276.6524        | 1.4624         | 0        | 6         | 42             | 7         | R.KPNSASQFTAAR.W                                                                      |
| <a href="#">2491</a> | 641.2136         | 1280.4127        | 1279.6857        | 0.7270         | 2        | 1         | 1.1e+02        | 4         | R.RRPSSDAKAHR.Q                                                                       |
| <a href="#">2518</a> | 643.0201         | 1284.0257        | 1282.5434        | 1.4823         | 0        | 13        | 7.4            | 3         | R.YLGCCTGPEAR.R <a href="#">2507</a>                                                  |
| <a href="#">2577</a> | <b>646.2876</b>  | <b>1290.5607</b> | <b>1289.7065</b> | <b>0.8542</b>  | <b>1</b> | <b>7</b>  | <b>36</b>      | <b>3</b>  | <b>K.SRVQPRPHASR.L</b>                                                                |
| <a href="#">2578</a> | 646.3106         | 1290.6067        | 1290.6754        | -0.0687        | 1        | 12        | 10             | 4         | K.DPFVLMLEERR.M                                                                       |
| <a href="#">2594</a> | <b>647.3436</b>  | <b>1292.6727</b> | <b>1291.6806</b> | <b>0.9921</b>  | <b>0</b> | <b>3</b>  | <b>74</b>      | <b>7</b>  | <b>K.TTLGSGLSGMLGAK.V</b> <a href="#">2606</a>                                        |
| <a href="#">2626</a> | <b>648.7156</b>  | <b>1295.4167</b> | <b>1294.6393</b> | <b>0.7774</b>  | <b>1</b> | <b>6</b>  | <b>43</b>      | <b>10</b> | <b>R.MLWWRNFSR.K</b>                                                                  |
| <a href="#">2724</a> | <b>436.8105</b>  | <b>1307.4097</b> | <b>1304.7023</b> | <b>2.7074</b>  | <b>1</b> | <b>10</b> | <b>15</b>      | <b>2</b>  | <b>K.REFNLVQLMR.C</b>                                                                 |
| <a href="#">2762</a> | <b>657.1581</b>  | <b>1312.3017</b> | <b>1311.7809</b> | <b>0.5208</b>  | <b>1</b> | <b>4</b>  | <b>59</b>      | <b>8</b>  | <b>K.LICRGLKPLSR.M</b>                                                                |
| <a href="#">2781</a> | 658.1591         | 1314.3037        | 1314.6317        | -0.3279        | 1        | 14        | 7.1            | 9         | R.NQWGVDEPRSK.K <a href="#">2794</a>                                                  |
| <a href="#">2784</a> | 658.3251         | 1314.6357        | 1313.7164        | 0.9193         | 2        | 3         | 88             | 2         | R.EESGVVLRGGR.G                                                                       |
| <a href="#">2822</a> | 660.1951         | 1318.3757        | 1315.5946        | 2.7812         | 0        | 4         | 63             | 4         | R.SHWTGGADNFPK.E                                                                      |
| <a href="#">2923</a> | <b>665.7216</b>  | <b>1329.4287</b> | <b>1326.6853</b> | <b>2.7434</b>  | <b>0</b> | <b>1</b>  | <b>1.4e+02</b> | <b>5</b>  | <b>K.FVAMAALATTTSK.C</b>                                                              |
| <a href="#">2943</a> | <b>666.6086</b>  | <b>1331.2027</b> | <b>1330.6854</b> | <b>0.5173</b>  | <b>2</b> | <b>6</b>  | <b>48</b>      | <b>1</b>  | <b>R.TSHPSFRSTRR.R</b>                                                                |
| <a href="#">3005</a> | <b>670.3451</b>  | <b>1338.6757</b> | <b>1336.6782</b> | <b>1.9975</b>  | <b>1</b> | <b>3</b>  | <b>66</b>      | <b>7</b>  | <b>R.RRPPAPCANNQK.T</b>                                                               |
| <a href="#">3010</a> | <b>670.6711</b>  | <b>1339.3277</b> | <b>1340.7677</b> | <b>-1.4400</b> | <b>2</b> | <b>6</b>  | <b>38</b>      | <b>1</b>  | <b>R.ATKNWPRVLTR.K</b>                                                                |
| <a href="#">3179</a> | 453.2799         | 1356.8177        | 1357.6851        | -0.8674        | 1        | 8         | 23             | 2         | K.RSPPHPTGAPGER.R                                                                     |

|                      |          |           |           |         |   |     |         |    |                                                                                   |
|----------------------|----------|-----------|-----------|---------|---|-----|---------|----|-----------------------------------------------------------------------------------|
| <a href="#">3209</a> | 454.2245 | 1359.6517 | 1358.7127 | 0.9390  | 2 | 9   | 19      | 7  | R.SVAGRRASQGGASR.V                                                                |
| <a href="#">3269</a> | 683.1366 | 1364.2587 | 1365.7616 | -1.5029 | 1 | 0   | 1.4e+02 | 10 | K.TEKVIHELIER.K                                                                   |
| <a href="#">3283</a> | 683.9951 | 1365.9757 | 1363.5688 | 2.4070  | 1 | 2   | 1e+02   | 9  | R.WERGSCGGQDGR.I                                                                  |
| <a href="#">3285</a> | 456.3912 | 1366.1517 | 1367.6187 | -1.4669 | 1 | 10  | 14      | 2  | R.QANASRCMFQR.C                                                                   |
| <a href="#">3327</a> | 686.1911 | 1370.3677 | 1369.8129 | 0.5549  | 2 | 1   | 1.2e+02 | 10 | R.LVVRWCIRLR.R                                                                    |
| <a href="#">3374</a> | 688.2076 | 1374.4007 | 1373.6874 | 0.7134  | 1 | 5   | 61      | 10 | K.NKIMNENGWLR.V                                                                   |
| <a href="#">3410</a> | 460.0165 | 1377.0277 | 1377.6897 | -0.6620 | 0 | 5   | 48      | 10 | R.CVLWVATTICR.R                                                                   |
| <a href="#">3421</a> | 690.1651 | 1378.3157 | 1376.6031 | 1.7127  | 0 | 5   | 46      | 8  | R.AHDFDSPTICSK.R                                                                  |
| <a href="#">3500</a> | 463.9192 | 1388.7357 | 1390.6993 | -1.9636 | 1 | 7   | 39      | 8  | K.ESHFLQPYSKR.N <a href="#">3509</a>                                              |
| <a href="#">3577</a> | 699.4461 | 1396.8777 | 1396.8224 | 0.0553  | 1 | 14  | 5.9     | 2  | R.LGEMPILLRSR.V <a href="#">3579</a> <a href="#">3582</a> <a href="#">3583</a>    |
| <a href="#">3684</a> | 707.0866 | 1412.1587 | 1413.6459 | -1.4872 | 1 | 2   | 1.1e+02 | 3  | K.ECPLEDPGRWR.A                                                                   |
| <a href="#">3696</a> | 707.8336 | 1413.6527 | 1414.7456 | -1.0929 | 2 | 7   | 35      | 1  | K.SDADPIKVEKWK.Q                                                                  |
| <a href="#">3714</a> | 708.7586 | 1415.5027 | 1414.7641 | 0.7387  | 2 | 5   | 54      | 10 | R.RSGETVREGGVIR.Y                                                                 |
| <a href="#">3807</a> | 476.8969 | 1427.6687 | 1427.6979 | -0.0292 | 0 | 9   | 18      | 2  | R.LYACPAADAALHR.A <a href="#">3805</a>                                            |
| <a href="#">3831</a> | 716.0801 | 1430.1457 | 1428.7395 | 1.4062  | 0 | 13  | 8.2     | 1  | R.IHTMSTSAPLLSR.Y                                                                 |
| <a href="#">3842</a> | 716.2611 | 1430.5077 | 1429.7460 | 0.7618  | 2 | 4   | 66      | 3  | R.LRSSMEVTAHRK.S                                                                  |
| <a href="#">3929</a> | 480.6205 | 1438.8397 | 1439.7707 | -0.9310 | 1 | 5   | 44      | 9  | R.GYQMGLLARFLR.R                                                                  |
| <a href="#">3946</a> | 721.9656 | 1441.9167 | 1439.6497 | 2.2670  | 0 | 4   | 61      | 4  | R.SSNLGMNGTGLMSR.R                                                                |
| <a href="#">3995</a> | 724.2381 | 1446.4617 | 1444.6538 | 1.8079  | 0 | 3   | 80      | 2  | R.LVSSTEMSTSTMR.F <a href="#">3997</a>                                            |
| <a href="#">4125</a> | 731.8126 | 1461.6107 | 1460.6487 | 0.9620  | 0 | (0) | 1.5e+02 | 6  | R.LVSSTEMSTSTMR.F                                                                 |
| <a href="#">4235</a> | 738.4021 | 1474.7897 | 1476.7837 | -1.9940 | 1 | 2   | 96      | 1  | K.WGLESLFRTVNR.L <a href="#">4242</a>                                             |
| <a href="#">4239</a> | 492.6635 | 1474.9687 | 1472.7406 | 2.2282  | 1 | 4   | 61      | 8  | R.GSGCKVSLPGDQLR.C                                                                |
| <a href="#">4269</a> | 739.6666 | 1477.3187 | 1477.8252 | -0.5065 | 2 | 8   | 26      | 8  | R.KAFDLSISSLRNK.D                                                                 |
| <a href="#">4320</a> | 742.7346 | 1483.4547 | 1483.8471 | -0.3923 | 1 | 0   | 1.5e+02 | 10 | R.TVNRLSLQPTLSR.C                                                                 |
| <a href="#">4344</a> | 744.3366 | 1486.6587 | 1485.6558 | 1.0029  | 0 | 7   | 34      | 1  | R.YASGPTFDICAER.I                                                                 |
| <a href="#">4370</a> | 497.8272 | 1490.4597 | 1489.7316 | 0.7282  | 1 | 9   | 21      | 10 | R.LCAPRMCANLLR.G                                                                  |
| <a href="#">4432</a> | 500.7739 | 1499.2997 | 1496.8212 | 2.4785  | 2 | 4   | 62      | 8  | R.EKRTASAVVPHR.V <a href="#">4433</a>                                             |
| <a href="#">4554</a> | 758.2261 | 1514.4377 | 1513.7671 | 0.6706  | 1 | 6   | 37      | 5  | R.VDNEVPRCSLLGR.F <a href="#">4553</a>                                            |
| <a href="#">4598</a> | 507.3849 | 1519.1327 | 1519.7114 | -0.5787 | 0 | 6   | 42      | 10 | K.GSELQS GEGNTISNK.E                                                              |
| <a href="#">4777</a> | 769.3351 | 1536.6557 | 1534.7814 | 1.8743  | 0 | 14  | 5.7     | 1  | K.VLMVDIGGGFGQSK.A <a href="#">4744</a> <a href="#">4770</a> <a href="#">4784</a> |
| <a href="#">4936</a> | 776.1681 | 1550.3217 | 1548.7501 | 1.5716  | 1 | 2   | 85      | 3  | R.SSACRIQTGCGKPK.R <a href="#">4916</a> <a href="#">4925</a>                      |
| <a href="#">5023</a> | 520.5519 | 1558.6337 | 1555.7354 | 2.8983  | 1 | 7   | 34      | 5  | R.RCGGATVWFYPSR.R                                                                 |
| <a href="#">5068</a> | 782.8416 | 1563.6687 | 1563.8290 | -0.1603 | 1 | 1   | 1.3e+02 | 10 | K.QKTTLGSLGMLGAK.V                                                                |
| <a href="#">5076</a> | 783.5086 | 1565.0027 | 1562.7253 | 2.2774  | 0 | 7   | 28      | 1  | K.GLFDYYSTVDEVR.G                                                                 |
| <a href="#">5122</a> | 524.1582 | 1569.4527 | 1567.8583 | 1.5944  | 2 | 5   | 49      | 6  | R.GDDKV FVHQRIVR.V                                                                |
| <a href="#">5123</a> | 785.7576 | 1569.5007 | 1569.7423 | -0.2416 | 0 | 7   | 30      | 6  | K.TDPFGLGNIHGEEGK.A                                                               |
| <a href="#">5271</a> | 528.7419 | 1583.2037 | 1580.7174 | 2.4863  | 0 | 5   | 41      | 10 | R.DSLMLDMNNVELR.S                                                                 |
| <a href="#">5371</a> | 531.7249 | 1592.1527 | 1593.8032 | -1.6505 | 1 | 19  | 1.8     | 1  | R.ISESAVKSTSMVSPR.W <a href="#">5382</a>                                          |
| <a href="#">5398</a> | 532.6199 | 1594.8377 | 1595.7508 | -0.9131 | 1 | (4) | 63      | 5  | R.SSNLGMNGTGLMSRR.L                                                               |
| <a href="#">5401</a> | 532.6612 | 1594.9617 | 1595.7508 | -0.7891 | 1 | 8   | 21      | 1  | K.RSSNLGMNGTGLMSR.R <a href="#">5396</a> <a href="#">5412</a>                     |
| <a href="#">5403</a> | 532.8025 | 1595.3857 | 1595.7508 | -0.3651 | 1 | (3) | 75      | 7  | K.RSSNLGMNGTGLMSR.R                                                               |

|                      |                 |                  |                  |                |          |            |                |           |                                               |
|----------------------|-----------------|------------------|------------------|----------------|----------|------------|----------------|-----------|-----------------------------------------------|
| <a href="#">5604</a> | <b>538.0929</b> | <b>1611.2567</b> | <b>1611.7457</b> | <b>-0.4890</b> | <b>1</b> | <b>(2)</b> | <b>93</b>      | <b>2</b>  | <b>K.RSSNLGMNGTGLMSR.R</b>                    |
| <a href="#">5610</a> | 806.7016        | 1611.3887        | 1611.7457        | -0.3570        | 1        | 7          | 29             | 5         | R.SSNLGMNGTGLMSRR.L <a href="#">5616</a>      |
| <a href="#">5650</a> | <b>539.1482</b> | <b>1614.4227</b> | <b>1615.8657</b> | <b>-1.4430</b> | <b>1</b> | <b>4</b>   | <b>58</b>      | <b>9</b>  | <b>K.RCWIAPFVLIQR.R</b>                       |
| <a href="#">5739</a> | 811.7191        | 1621.4237        | 1620.8260        | 0.5977         | 0        | 1          | 1.1e+02        | 10        | R.SLEHSPDLFPGPGIR.K                           |
| <a href="#">5783</a> | 813.1726        | 1624.3307        | 1621.8280        | 2.5028         | 1        | 3          | 74             | 4         | R.LNAMTLQSSNRLMK.R                            |
| <a href="#">5829</a> | <b>543.7465</b> | <b>1628.2177</b> | <b>1628.8522</b> | <b>-0.6345</b> | <b>0</b> | <b>7</b>   | <b>28</b>      | <b>2</b>  | <b>K.ADQGVSAEPVPLPPPR.N</b>                   |
| <a href="#">5870</a> | 816.9091        | 1631.8037        | 1632.9212        | -1.1175        | 1        | 0          | 1.4e+02        | 6         | R.IRAAHLTHDVVFVR.A                            |
| <a href="#">5967</a> | <b>547.7352</b> | <b>1640.1837</b> | <b>1641.7569</b> | <b>-1.5732</b> | <b>1</b> | <b>4</b>   | <b>61</b>      | <b>2</b>  | <b>R.RYASGPTFDICAER.I</b>                     |
| <a href="#">6038</a> | 823.6196        | 1645.2247        | 1642.8652        | 2.3596         | 2        | 7          | 29             | 2         | R.SIPATSQSWRARQR.C                            |
| <a href="#">6072</a> | 824.6816        | 1647.3487        | 1645.7947        | 1.5540         | 1        | 0          | 1.5e+02        | 3         | R.YLATAGETKSPEDHK.L                           |
| <a href="#">6157</a> | <b>552.1452</b> | <b>1653.4137</b> | <b>1652.8100</b> | <b>0.6038</b>  | <b>2</b> | <b>3</b>   | <b>67</b>      | <b>5</b>  | <b>R.CRRRPPAPCNNQK.T</b> <a href="#">6138</a> |
| <a href="#">6201</a> | <b>829.6016</b> | <b>1657.1887</b> | <b>1657.8107</b> | <b>-0.6220</b> | <b>2</b> | <b>4</b>   | <b>61</b>      | <b>2</b>  | <b>R.MVWDIDPRQRNGR.S</b>                      |
| <a href="#">6486</a> | <b>560.3782</b> | <b>1678.1127</b> | <b>1676.9111</b> | <b>1.2017</b>  | <b>1</b> | <b>12</b>  | <b>9.5</b>     | <b>2</b>  | <b>R.HPSAQLVTRVEVR.E</b> <a href="#">6489</a> |
| <a href="#">6782</a> | 850.7426        | 1699.4707        | 1699.8907        | -0.4199        | 2        | 21         | 1.1            | 2         | K.GARTLHRAGFPNFEK.I <a href="#">6778</a>      |
| <a href="#">6837</a> | 852.2501        | 1702.4857        | 1701.7642        | 0.7216         | 1        | 0          | 1.4e+02        | 8         | R.DDPVECGRHDLPLR.R                            |
| <a href="#">6868</a> | 853.5061        | 1704.9977        | 1705.9475        | -0.9498        | 1        | 1          | 1.2e+02        | 9         | R.SVPPRLAAPESGGIAVR.V <a href="#">6898</a>    |
| <a href="#">6877</a> | <b>853.8056</b> | <b>1705.5967</b> | <b>1703.8856</b> | <b>1.7112</b>  | <b>2</b> | <b>4</b>   | <b>61</b>      | <b>1</b>  | <b>K.TVPWRYASVNREAR.R</b>                     |
| <a href="#">7009</a> | <b>573.6062</b> | <b>1717.7967</b> | <b>1715.8526</b> | <b>1.9442</b>  | <b>2</b> | <b>6</b>   | <b>37</b>      | <b>2</b>  | <b>R.DGLCAKWNTPTARAR.A</b>                    |
| <a href="#">7027</a> | <b>861.2026</b> | <b>1720.3907</b> | <b>1718.8376</b> | <b>1.5531</b>  | <b>1</b> | <b>1</b>   | <b>1e+02</b>   | <b>5</b>  | <b>K.YIYSPSHERDSLPR.S</b>                     |
| <a href="#">7278</a> | 582.7869        | 1745.3387        | 1745.9359        | -0.5972        | 2        | 1          | 1.3e+02        | 6         | R.CGGKLQSLPVRAAAYR.C                          |
| <a href="#">7282</a> | <b>582.8192</b> | <b>1745.4357</b> | <b>1742.9362</b> | <b>2.4995</b>  | <b>1</b> | <b>3</b>   | <b>79</b>      | <b>9</b>  | <b>R.ATAILTRWTRPCAAR.L</b>                    |
| <a href="#">7294</a> | 874.2596        | 1746.5047        | 1746.8173        | -0.3126        | 0        | 4          | 63             | 5         | R.LSSAQESFSEGGNIHGK.C                         |
| <a href="#">7350</a> | <b>878.4006</b> | <b>1754.7867</b> | <b>1751.8519</b> | <b>2.9348</b>  | <b>2</b> | <b>3</b>   | <b>64</b>      | <b>1</b>  | <b>K.RSSNLGMNGTGLMSRR.L</b>                   |
| <a href="#">7373</a> | <b>879.7526</b> | <b>1757.4907</b> | <b>1756.9148</b> | <b>0.5759</b>  | <b>0</b> | <b>1</b>   | <b>1.2e+02</b> | <b>2</b>  | <b>K.VHYLGISDSPAWVVSK.A</b>                   |
| <a href="#">7448</a> | <b>883.0561</b> | <b>1764.0977</b> | <b>1762.8575</b> | <b>1.2402</b>  | <b>2</b> | <b>2</b>   | <b>89</b>      | <b>3</b>  | <b>R.IVERRCRPMQCMK.R</b>                      |
| <a href="#">7580</a> | 888.2361        | 1774.4577        | 1773.8913        | 0.5664         | 2        | 2          | 1e+02          | 2         | R.MCARPMPVGGVQKRR.C                           |
| <a href="#">7601</a> | <b>593.1409</b> | <b>1776.4007</b> | <b>1775.9107</b> | <b>0.4900</b>  | <b>1</b> | <b>9</b>   | <b>21</b>      | <b>4</b>  | <b>R.RLLWQSGPYSDLWR.J</b>                     |
| <a href="#">7604</a> | 889.3046        | 1776.5947        | 1776.9522        | -0.3575        | 1        | 8          | 24             | 2         | R.QAYIWLSKISSTPQR.T                           |
| <a href="#">7675</a> | <b>595.1975</b> | <b>1782.5707</b> | <b>1780.9114</b> | <b>1.6593</b>  | <b>2</b> | <b>5</b>   | <b>42</b>      | <b>10</b> | <b>R.NRDRSASPMASAILR.I</b>                    |
| <a href="#">7691</a> | 892.6711        | 1783.3277        | 1782.9523        | 0.3754         | 1        | 4          | 53             | 10        | R.ARISLLGATSGVVSHCR.R                         |
| <a href="#">7806</a> | 897.6361        | 1793.2577        | 1791.0155        | 2.2422         | 2        | 4          | 57             | 7         | R.FESARLRSAPYLLIR.Q                           |
| <a href="#">7885</a> | 901.8376        | 1801.6607        | 1801.8958        | -0.2351        | 2        | 4          | 53             | 5         | K.RYLATAGETKSPEDHK.L                          |
| <a href="#">7978</a> | <b>906.7496</b> | <b>1811.4847</b> | <b>1810.9108</b> | <b>0.5739</b>  | <b>2</b> | <b>1</b>   | <b>1e+02</b>   | <b>7</b>  | <b>R.LSGDRTIQFQRSMTR.C</b>                    |
| <a href="#">7998</a> | 605.1209        | 1812.3407        | 1810.7913        | 1.5494         | 1        | 12         | 10             | 4         | R.YCRCGPELPLCSGSR.E <a href="#">7996</a>      |
| <a href="#">8072</a> | <b>607.2382</b> | <b>1818.6927</b> | <b>1817.9127</b> | <b>0.7800</b>  | <b>1</b> | <b>11</b>  | <b>12</b>      | <b>3</b>  | <b>R.LRDSLMLDMNNVELR.S</b>                    |
| <a href="#">8125</a> | 609.5842        | 1825.7307        | 1825.9548        | -0.2240        | 1        | 4          | 59             | 9         | R.LAGRFTDGVHGSLGQGV.R.H                       |
| <a href="#">8157</a> | 915.1171        | 1828.2197        | 1827.9374        | 0.2824         | 2        | 5          | 47             | 3         | R.GRGNQDCTSKIGAPVIR.R                         |
| <a href="#">8309</a> | 924.7631        | 1847.5117        | 1845.9923        | 1.5194         | 1        | 2          | 81             | 4         | R.WWIIVMSELTLRQR.R                            |
| <a href="#">8338</a> | 926.0856        | 1850.1567        | 1849.9026        | 0.2541         | 1        | (3)        | 73             | 3         | R.LRDSLMLDMNNVELR.S                           |
| <a href="#">8414</a> | 929.2726        | 1856.5307        | 1857.9710        | -1.4403        | 2        | 15         | 4.6            | 2         | K.WNNQIFGSRRAPLGSR.J <a href="#">8415</a>     |
| <a href="#">8420</a> | <b>620.0419</b> | <b>1857.1037</b> | <b>1856.9648</b> | <b>0.1389</b>  | <b>2</b> | <b>8</b>   | <b>20</b>      | <b>4</b>  | <b>R.VRMCARPMPVGGVQKR.R</b>                   |

|                       |           |           |           |         |   |     |         |    |                                                                     |
|-----------------------|-----------|-----------|-----------|---------|---|-----|---------|----|---------------------------------------------------------------------|
| <a href="#">8423</a>  | 620.1289  | 1857.3647 | 1856.9648 | 0.3999  | 2 | (5) | 39      | 2  | R.VRMCARMPVGGVQKR.R                                                 |
| <a href="#">8563</a>  | 625.6809  | 1874.0207 | 1874.8945 | -0.8738 | 1 | 1   | 1.1e+02 | 6  | R.LPVSECERFDLSPGGGR.G                                               |
| <a href="#">8722</a>  | 630.8102  | 1889.4087 | 1887.9295 | 1.4792  | 2 | 1   | 1.2e+02 | 5  | R.LVSSTEMSTSTMRFR.M                                                 |
| <a href="#">8760</a>  | 632.3142  | 1893.9207 | 1890.9986 | 2.9221  | 1 | 2   | 77      | 9  | K.VLMVDIGGGFGQSKALR.A                                               |
| <a href="#">8779</a>  | 633.2759  | 1896.8057 | 1895.0741 | 1.7316  | 1 | 1   | 1e+02   | 3  | R.RDHIKPLLGISSYLQR.T                                                |
| <a href="#">8830</a>  | 634.7709  | 1901.2907 | 1900.8666 | 0.4242  | 0 | 2   | 81      | 3  | R.LHDVFFSQETMFEAGK.H                                                |
| <a href="#">8867</a>  | 635.6602  | 1903.9587 | 1903.9244 | 0.0343  | 2 | (1) | 1.3e+02 | 6  | R.LVSSTEMSTSTMRFR.M                                                 |
| <a href="#">8876</a>  | 636.1729  | 1905.4967 | 1902.8570 | 2.6397  | 0 | 1   | 1.1e+02 | 8  | R.WSGSPAEPPECPSLAR.V                                                |
| <a href="#">8934</a>  | 638.7415  | 1913.2027 | 1912.9901 | 0.2126  | 2 | 4   | 55      | 6  | K.DAIESGVLGRRCTIGPR.T                                               |
| <a href="#">8964</a>  | 639.3442  | 1915.0107 | 1916.9271 | -1.9163 | 1 | 2   | 94      | 8  | R.RIMHGSEVCSVMPSTK.V                                                |
| <a href="#">9017</a>  | 641.1762  | 1920.5067 | 1917.8785 | 2.6282  | 1 | 2   | 80      | 10 | K.GDENGSPMIRNVNLCAR.M                                               |
| <a href="#">9076</a>  | 965.7201  | 1929.4257 | 1929.0836 | 0.3421  | 2 | 1   | 1.2e+02 | 10 | K.IKDFAYPVEVIPNIRR.I                                                |
| <a href="#">9216</a>  | 650.3989  | 1948.1747 | 1946.9956 | 1.1791  | 1 | 4   | 61      | 4  | R.GENIIQSLRPRSTMSR.Y <a href="#">9222</a>                           |
| <a href="#">9264</a>  | 652.1495  | 1953.4267 | 1952.0262 | 1.4006  | 1 | 9   | 16      | 2  | K.VRAEQSLCLNASVHLAK.I                                               |
| <a href="#">9298</a>  | 653.8122  | 1958.4147 | 1955.9696 | 2.4451  | 0 | 1   | 1e+02   | 6  | R.CSSIEPILIIYSATISR.L                                               |
| <a href="#">9348</a>  | 655.6682  | 1963.9827 | 1964.0149 | -0.0322 | 0 | 6   | 35      | 1  | R.LMYNALILSARPDASSSR.V                                              |
| <a href="#">9392</a>  | 657.6259  | 1969.8557 | 1967.8288 | 2.0269  | 0 | 15  | 4.5     | 2  | R.SCCGTLATPTQQCNWGK.R <a href="#">9383</a>                          |
| <a href="#">9407</a>  | 658.2845  | 1971.8317 | 1969.0601 | 2.7716  | 1 | 5   | 41      | 3  | K.SCCGPLQILPISRSLIR.V <a href="#">9393</a> <a href="#">9405</a>     |
| <a href="#">9436</a>  | 659.6475  | 1975.9207 | 1975.0520 | 0.8687  | 1 | 3   | 62      | 3  | K.TRSTMQGITIQEAGLTLR.D                                              |
| <a href="#">9559</a>  | 664.7742  | 1991.3007 | 1991.0854 | 0.2154  | 2 | 2   | 85      | 6  | R.AVGWVHPGKIRGDFIPSR.A                                              |
| <a href="#">9564</a>  | 664.8135  | 1991.4187 | 1991.9750 | -0.5563 | 0 | 5   | 47      | 7  | R.WPSSCGILISLWMWTR.L                                                |
| <a href="#">9686</a>  | 1003.6916 | 2005.3687 | 2006.0553 | -0.6866 | 2 | 0   | 1.2e+02 | 3  | R.FPRLNAMTLQSSNRLMK.R                                               |
| <a href="#">9735</a>  | 671.7552  | 2012.2437 | 2014.0894 | -1.8457 | 1 | 0   | 1.3e+02 | 10 | R.YCRPQPTSVVRPSIRAK.L                                               |
| <a href="#">9772</a>  | 673.1675  | 2016.4807 | 2015.8976 | 0.5832  | 0 | 0   | 1.2e+02 | 7  | R.DTLKPQRPHGCSMDACK.Y                                               |
| <a href="#">9813</a>  | 675.0902  | 2022.2487 | 2020.9175 | 1.3312  | 0 | 54  | 0.00056 | 1  | K.AFGSDLTMFEWMPQHPK.H <a href="#">9804</a> <a href="#">9815</a>     |
| <a href="#">9856</a>  | 676.3915  | 2026.1527 | 2027.0146 | -0.8619 | 1 | 7   | 26      | 2  | R.ACFSVVAVRNDETVVYK.L <a href="#">9849</a>                          |
| <a href="#">9921</a>  | 678.8085  | 2033.4037 | 2035.0125 | -1.6088 | 2 | 9   | 18      | 1  | R.NVNLCARMLNAGTTMKK.K                                               |
| <a href="#">10061</a> | 682.6795  | 2045.0167 | 2046.9840 | -1.9673 | 1 | 0   | 1.3e+02 | 9  | R.LCOMPSSSLPGRHPQGGPR.G                                             |
| <a href="#">10106</a> | 684.0532  | 2049.1377 | 2048.0208 | 1.1169  | 1 | 4   | 57      | 2  | R.ITSGQDVVNLVSACKGDTGK.S                                            |
| <a href="#">10175</a> | 686.7855  | 2057.3347 | 2056.1218 | 1.2129  | 1 | 3   | 65      | 7  | R.IGQRVLSFPDWQLQTLR.R                                               |
| <a href="#">10235</a> | 688.6165  | 2062.8277 | 2062.1047 | 0.7230  | 2 | 3   | 65      | 6  | R.GLKPLSRMLWWRNFSR.K                                                |
| <a href="#">10269</a> | 1033.7701 | 2065.5257 | 2065.1102 | 0.4155  | 1 | 2   | 82      | 5  | R.AEQSLCLNASVHLAKIVR.C                                              |
| <a href="#">10289</a> | 690.5172  | 2068.5297 | 2066.9585 | 1.5712  | 0 | 41  | 0.011   | 1  | R.FIFEEVAPDQYAHTDASK.M <a href="#">10286</a>                        |
| <a href="#">10323</a> | 692.4769  | 2074.4087 | 2075.0694 | -0.6607 | 1 | 9   | 16      | 1  | R.QAMPSTPHGIQPRSGNLIR.I <a href="#">10324</a> <a href="#">10341</a> |
| <a href="#">10384</a> | 694.6859  | 2081.0357 | 2078.2584 | 2.7773  | 1 | (0) | 1.2e+02 | 2  | R.LMLIPRPTLMLILIRNR.I                                               |
| <a href="#">10386</a> | 694.7089  | 2081.1047 | 2078.2584 | 2.8463  | 1 | 1   | 1.1e+02 | 5  | R.LMLIPRPTLMLILIRNR.I                                               |
| <a href="#">10446</a> | 697.8545  | 2090.5417 | 2090.1306 | 0.4111  | 2 | 6   | 32      | 6  | K.VLMVDIGGGFGQSKALRAK.F                                             |
| <a href="#">10482</a> | 699.2742  | 2094.8007 | 2093.0211 | 1.7796  | 1 | 1   | 97      | 7  | R.MIYAHSDGISTTVAGRSAEK.T                                            |
| <a href="#">10527</a> | 701.3205  | 2100.9397 | 2101.1069 | -0.1671 | 0 | 0   | 1.3e+02 | 8  | R.WLSHHAQIVGTNTAPSLAAK.V                                            |
| <a href="#">10536</a> | 701.7735  | 2102.2987 | 2103.0967 | -0.7980 | 2 | 1   | 1e+02   | 10 | R.RGENIIQSLRPRSTMSR.Y                                               |
| <a href="#">10544</a> | 1052.5286 | 2103.0427 | 2103.0194 | 0.0233  | 0 | 21  | 1.1     | 1  | R.AEWDDLMEQVLEIIQSK.V                                               |

|                       |                 |                  |                  |                |          |           |            |          |                                    |                       |                       |
|-----------------------|-----------------|------------------|------------------|----------------|----------|-----------|------------|----------|------------------------------------|-----------------------|-----------------------|
| <a href="#">10762</a> | 713.4415        | 2137.3027        | 2138.1776        | -0.8748        | 1        | 2         | 86         | 5        | R.NIYFLVPGLLSGSDFKIQK.S            | <a href="#">10759</a> | <a href="#">10766</a> |
| <a href="#">10954</a> | 721.4885        | 2161.4437        | 2162.1340        | -0.6903        | 1        | 2         | 78         | 2        | R.ARAVSVPPAIMFSVSICSR.V            |                       |                       |
| <a href="#">11048</a> | <b>725.2565</b> | <b>2172.7477</b> | <b>2174.1841</b> | <b>-1.4364</b> | <b>2</b> | <b>14</b> | <b>5.9</b> | <b>1</b> | <b>K.AKTRSTMQGITIQEAGLTLR.D</b>    | <a href="#">11059</a> |                       |
| <a href="#">11141</a> | 730.4179        | 2188.2317        | 2187.9249        | 0.3069         | 1        | 1         | 1.1e+02    | 5        | R.CGDSGGAGADVWCFIMTGRR.Q           | <a href="#">11139</a> |                       |
| <a href="#">11256</a> | 734.1592        | 2199.4557        | 2199.1007        | 0.3550         | 0        | 0         | 1.3e+02    | 6        | R.ELMGPASHIFQALEHNIR.J             |                       |                       |
| <a href="#">11308</a> | <b>737.3735</b> | <b>2209.0987</b> | <b>2209.3166</b> | <b>-0.2179</b> | <b>1</b> | <b>4</b>  | <b>51</b>  | <b>1</b> | <b>R.TQRLMLIPRPTLMLILIR.N</b>      |                       |                       |
| <a href="#">11352</a> | 738.6302        | 2212.8687        | 2212.2229        | 0.6458         | 2        | 2         | 88         | 5        | R.IGQRVLSFPDWQLQTLRR.Q             |                       |                       |
| <a href="#">11364</a> | 1107.9231       | 2213.8317        | 2211.0273        | 2.8044         | 2        | 2         | 83         | 3        | R.SERSSGNTAAICPICNYRR.Q            |                       |                       |
| <a href="#">11469</a> | 744.5109        | 2230.5107        | 2232.0456        | -1.5349        | 2        | 4         | 47         | 2        | R.TYWPSACKKVETMQQGYR.R             |                       |                       |
| <a href="#">11629</a> | 753.2769        | 2256.8087        | 2257.1868        | -0.3781        | 2        | 4         | 56         | 5        | R.DHGLRQFVVYQGLWNAAKR.D            |                       |                       |
| <a href="#">11721</a> | 759.0565        | 2274.1477        | 2273.2170        | 0.9307         | 2        | 1         | 1e+02      | 3        | R.STAILCGLNPMRLATQMLKR.G           |                       |                       |
| <a href="#">11743</a> | 759.4955        | 2275.4647        | 2276.2232        | -0.7585        | 0        | 1         | 99         | 9        | K.MSVALGSAIMIVASVIQAATVGR.W        |                       |                       |
| <a href="#">11913</a> | 766.7665        | 2297.2777        | 2295.2695        | 2.0083         | 0        | 1         | 94         | 3        | K.ILLGITPGISPTCGLSLVPTMR.L         |                       |                       |
| <a href="#">12052</a> | 771.9839        | 2312.9297        | 2310.2327        | 2.6970         | 1        | 1         | 1e+02      | 7        | R.CSSIEPILIIYMSATISRLK.H           |                       |                       |
| <a href="#">12107</a> | 774.6892        | 2321.0457        | 2319.1325        | 1.9133         | 2        | 1         | 96         | 6        | R.LCQMPGSSSLPGRHPQGGPRGSK.E        |                       |                       |
| <a href="#">12366</a> | 789.9182        | 2366.7327        | 2364.2437        | 2.4890         | 2        | 2         | 84         | 2        | R.NNFLSNVEKKLAPSLASSNFGK.R         |                       |                       |
| <a href="#">12417</a> | 792.0559        | 2373.1457        | 2373.2454        | -0.0997        | 2        | 2         | 81         | 8        | R.RYFSPRHSLSIQGNVIWGTR.G           |                       |                       |
| <a href="#">12434</a> | 792.5785        | 2374.7137        | 2376.1631        | -1.4494        | 1        | 2         | 76         | 9        | R.TRAEWDDLMEQVGLEIIQSK.V           |                       |                       |
| <a href="#">12649</a> | 803.2165        | 2406.6277        | 2404.3182        | 2.3095         | 1        | 4         | 54         | 5        | R.KMSVALGSAIMIVASVIQAATVGR.W       |                       |                       |
| <a href="#">12660</a> | 803.8829        | 2408.6267        | 2406.2366        | 2.3902         | 1        | 1         | 95         | 10       | R.VRIHPEGYTPAPGTPPATASMLK.A        | <a href="#">12652</a> |                       |
| <a href="#">12901</a> | 814.5199        | 2440.5377        | 2438.2331        | 2.3046         | 1        | 1         | 82         | 2        | K.IRPMLWWWSGTRSWGHGVAR.D           |                       |                       |
| <a href="#">13084</a> | 823.4165        | 2467.2277        | 2468.2693        | -1.0416        | 2        | 3         | 72         | 2        | R.IQVNYGGTGTSMRLSVDASLQK.L         |                       |                       |
| <a href="#">13139</a> | 825.2739        | 2472.7997        | 2470.3049        | 2.4948         | 0        | 15        | 3.9        | 2        | R.FNFWIWLAAEGVETTIHVPLK.G          |                       |                       |
| <a href="#">13217</a> | 828.6342        | 2482.8807        | 2482.3056        | 0.5751         | 2        | 1         | 1.1e+02    | 6        | R.TTSRMPPAFFSIPWHVSPRIR.R          |                       |                       |
| <a href="#">13225</a> | 828.9809        | 2483.9207        | 2481.3704        | 2.5504         | 2        | 2         | 70         | 5        | R.FVVTSVLPGELRSIRVDNEVPR.C         |                       |                       |
| <a href="#">13257</a> | 830.3592        | 2488.0557        | 2485.2127        | 2.8430         | 2        | 7         | 23         | 3        | R.CSRGMVDAGPKFVAMAALATTTSK.C       |                       |                       |
| <a href="#">13348</a> | 834.5242        | 2500.5507        | 2498.3032        | 2.2475         | 2        | 0         | 1.1e+02    | 4        | K.SCCGPLQILPISRSLIRVCNR.H          |                       |                       |
| <a href="#">13364</a> | 835.4795        | 2503.4167        | 2501.2698        | 2.1469         | 2        | 2         | 75         | 5        | R.STLIKSLSSLEMYFKCFLR.S            |                       |                       |
| <a href="#">13404</a> | 836.9332        | 2507.7777        | 2507.2016        | 0.5761         | 0        | 2         | 78         | 5        | K.TVTQGNHVVHIYAAMDGWPPNK.S         |                       |                       |
| <a href="#">13593</a> | <b>844.2442</b> | <b>2529.7107</b> | <b>2529.0974</b> | <b>0.6133</b>  | <b>1</b> | <b>1</b>  | <b>82</b>  | <b>1</b> | <b>R.QEPSDCDYPGSMKAVSHLFSK.W</b>   |                       |                       |
| <a href="#">13641</a> | 846.5529        | 2536.6367        | 2538.2107        | -1.5740        | 1        | 7         | 26         | 2        | R.LSSTRTMMSSGYPGLSIAHWNR.S         |                       |                       |
| <a href="#">13699</a> | <b>850.6325</b> | <b>2548.8757</b> | <b>2548.3472</b> | <b>0.5286</b>  | <b>0</b> | <b>10</b> | <b>13</b>  | <b>1</b> | <b>R.IAMGIGLGFQAAPPLTTEIAHPR.H</b> |                       |                       |
| <a href="#">13761</a> | 852.6762        | 2555.0067        | 2554.2057        | 0.8011         | 1        | (1)       | 1e+02      | 10       | R.LSSTRTMMSSGYPGLSIAHWNR.S         |                       |                       |
| <a href="#">13822</a> | <b>856.2899</b> | <b>2565.8477</b> | <b>2566.4530</b> | <b>-0.6052</b> | <b>2</b> | <b>3</b>  | <b>58</b>  | <b>1</b> | <b>R.GRLLLGQSLSNRAPLLAVMTFR.F</b>  |                       |                       |
| <a href="#">13824</a> | 856.5565        | 2566.6477        | 2564.3614        | 2.2864         | 1        | 3         | 61         | 3        | R.APLLAVMTFRFEGHSGWLIYK.E          | <a href="#">13823</a> |                       |
| <a href="#">13974</a> | 867.0505        | 2598.1297        | 2598.3880        | -0.2583        | 2        | 5         | 40         | 2        | R.SFTPFMTKLWDSTVSLLIKTR.C          |                       |                       |
| <a href="#">14524</a> | <b>898.2885</b> | <b>2691.8437</b> | <b>2692.2884</b> | <b>-0.4446</b> | <b>2</b> | <b>6</b>  | <b>31</b>  | <b>1</b> | <b>K.RQLGGLMWCSALESTRTTDMHVK.S</b> |                       |                       |
| <a href="#">14626</a> | 904.7085        | 2711.1037        | 2712.2861        | -1.1823        | 1        | 2         | 75         | 4        | K.SNTCVAFKPRQTSQSNWSTVMAR.I        | <a href="#">14625</a> |                       |
| <a href="#">14835</a> | 922.7792        | 2765.3157        | 2765.3225        | -0.0068        | 1        | 1         | 99         | 6        | R.SMTRCPGSQNGAPSPPLISLSPQDPR.H     |                       |                       |
| <a href="#">15011</a> | 938.8859        | 2813.6357        | 2814.2604        | -0.6247        | 1        | 2         | 70         | 2        | K.DCVFQKAFGSDLTMFEWMPQHPK.H        |                       |                       |
| <a href="#">15245</a> | 965.8289        | 2894.4647        | 2892.3887        | 2.0761         | 2        | 1         | 72         | 4        | K.GHWNTFSWTLRLRFMMRMEHIQR.A        |                       |                       |

|                       |                  |                  |                  |                |          |          |           |          |                                                             |
|-----------------------|------------------|------------------|------------------|----------------|----------|----------|-----------|----------|-------------------------------------------------------------|
| <a href="#">15568</a> | 1018.2382        | 3051.6927        | 3051.8405        | -0.1478        | 2        | 1        | 78        | 2        | R.LMLIPRPTLMLILIRNRIHNLILNR.I                               |
| <a href="#">15819</a> | 1054.3972        | 3160.1697        | 3158.5356        | 1.6341         | 2        | 1        | 81        | 7        | R.MSREPRLLNDSLGFEPFELSHFHQR.Q                               |
| <a href="#">15968</a> | 1083.2042        | 3246.5907        | 3246.6352        | -0.0444        | 2        | 1        | 70        | 7        | R.MYPVWPVVDVARLRDSLMLDMNNVELR.S                             |
| <a href="#">15991</a> | <b>1087.1869</b> | <b>3258.5387</b> | <b>3258.6563</b> | <b>-0.1176</b> | <b>1</b> | <b>7</b> | <b>17</b> | <b>1</b> | <b>R.INSSPNIPVEADPPICIVVCSAMIKLHER.R</b>                    |
| <a href="#">16303</a> | 1142.2029        | 3423.5867        | 3423.5815        | 0.0053         | 2        | 6        | 22        | 4        | K.AEADADPVVEEKTDPFGLGNIHGEEGKAAGTNR.H <a href="#">16308</a> |

228. [gi|220699528|gb|EED55867.1|](#) Mass: 17846 Score: 117 Queries matched: 34 emPAI: 1.82

ubiquitin (UbiC), putative [Aspergillus flavus NRRL3357]

| Query                 | Observed        | Mr(expt)         | Mr(calc)         | Delta          | Miss     | Score      | Expect         | Rank     | Peptide                                                                                                                                                                       |
|-----------------------|-----------------|------------------|------------------|----------------|----------|------------|----------------|----------|-------------------------------------------------------------------------------------------------------------------------------------------------------------------------------|
| <a href="#">22</a>    | <b>324.9441</b> | <b>647.8737</b>  | <b>647.4006</b>  | <b>0.4731</b>  | <b>0</b> | <b>27</b>  | <b>0.46</b>    | <b>1</b> | <b>R.LIFAGK.Q</b> <a href="#">20</a> <a href="#">23</a> <a href="#">24</a>                                                                                                    |
| <a href="#">198</a>   | <b>781.5760</b> | <b>780.5687</b>  | <b>780.4204</b>  | <b>0.1483</b>  | <b>0</b> | <b>22</b>  | <b>0.86</b>    | <b>1</b> | <b>-MQIFVK.T</b> <a href="#">196</a>                                                                                                                                          |
| <a href="#">702</a>   | 482.5226        | 963.0307         | 963.5753         | -0.5446        | 2        | 11         | 16             | 7        | K.KVYTPPK.I                                                                                                                                                                   |
| <a href="#">827</a>   | <b>987.5940</b> | <b>986.5867</b>  | <b>987.4985</b>  | <b>-0.9118</b> | <b>1</b> | <b>11</b>  | <b>15</b>      | <b>1</b> | <b>K.VDGDGKIER.L</b>                                                                                                                                                          |
| <a href="#">1046</a>  | <b>520.7191</b> | <b>1039.4237</b> | <b>1038.5094</b> | <b>0.9143</b>  | <b>0</b> | <b>47</b>  | <b>0.003</b>   | <b>1</b> | <b>K.EGIPPDQQR.L</b> <a href="#">1030</a> <a href="#">1037</a> <a href="#">1045</a>                                                                                           |
| <a href="#">1181</a>  | <b>534.5726</b> | <b>1067.1307</b> | <b>1066.6135</b> | <b>0.5172</b>  | <b>0</b> | <b>46</b>  | <b>0.0035</b>  | <b>1</b> | <b>K.ESTLHLVLR.L</b> <a href="#">1191</a> <a href="#">1200</a>                                                                                                                |
| <a href="#">1261</a>  | <b>541.4061</b> | <b>1080.7977</b> | <b>1080.5451</b> | <b>0.2526</b>  | <b>0</b> | <b>39</b>  | <b>0.017</b>   | <b>1</b> | <b>R.TLSDYNIQK.E</b> <a href="#">1257</a> <a href="#">1259</a> <a href="#">1263</a>                                                                                           |
| <a href="#">1577</a>  | 568.0741        | 1134.1337        | 1133.6808        | 0.4529         | 1        | 1          | 1.5e+02        | 9        | M.QIFVKTLTGK.T <a href="#">1579</a>                                                                                                                                           |
| <a href="#">4654</a>  | <b>762.6321</b> | <b>1523.2497</b> | <b>1522.7740</b> | <b>0.4758</b>  | <b>1</b> | <b>61</b>  | <b>0.00011</b> | <b>1</b> | <b>K.IQDKEGIPPDQQR.L</b>                                                                                                                                                      |
| <a href="#">7449</a>  | <b>883.0766</b> | <b>1764.1387</b> | <b>1762.8836</b> | <b>1.2551</b>  | <b>0</b> | <b>30</b>  | <b>0.13</b>    | <b>1</b> | <b>K.TITLEVESSDTIDNVK.S</b> <a href="#">7433</a> <a href="#">7437</a> <a href="#">7444</a> <a href="#">7445</a> <a href="#">7447</a> <a href="#">7448</a> <a href="#">745</a> |
| <a href="#">10555</a> | <b>702.6812</b> | <b>2105.0217</b> | <b>2103.8747</b> | <b>1.1470</b>  | <b>0</b> | <b>(7)</b> | <b>26</b>      | <b>3</b> | <b>R.ECPAPECGAGVFMAAMHNR.Q</b> <a href="#">10554</a>                                                                                                                          |
| <a href="#">10655</a> | <b>708.2002</b> | <b>2121.5787</b> | <b>2119.8696</b> | <b>1.7091</b>  | <b>0</b> | <b>7</b>   | <b>22</b>      | <b>2</b> | <b>R.ECPAPECGAGVFMAAMHNR.Q</b>                                                                                                                                                |
| <a href="#">11753</a> | <b>760.3535</b> | <b>2278.0387</b> | <b>2275.9707</b> | <b>2.0680</b>  | <b>1</b> | <b>2</b>   | <b>77</b>      | <b>2</b> | <b>R.RECPAPECGAGVFMAAMHNR.Q</b>                                                                                                                                               |

229. [gi|220699027|gb|EED55366.1|](#) Mass: 34266 Score: 117 Queries matched: 30 emPAI: 0.74

polyubiquitin UbiD/Ubi4, putative [Aspergillus flavus NRRL3357]

| Query                 | Observed        | Mr(expt)         | Mr(calc)         | Delta          | Miss     | Score     | Expect         | Rank     | Peptide                                                                                                                                                                       |
|-----------------------|-----------------|------------------|------------------|----------------|----------|-----------|----------------|----------|-------------------------------------------------------------------------------------------------------------------------------------------------------------------------------|
| <a href="#">22</a>    | <b>324.9441</b> | <b>647.8737</b>  | <b>647.4006</b>  | <b>0.4731</b>  | <b>0</b> | <b>27</b> | <b>0.46</b>    | <b>1</b> | <b>R.LIFAGK.Q</b> <a href="#">20</a> <a href="#">23</a> <a href="#">24</a>                                                                                                    |
| <a href="#">198</a>   | <b>781.5760</b> | <b>780.5687</b>  | <b>780.4204</b>  | <b>0.1483</b>  | <b>0</b> | <b>22</b> | <b>0.86</b>    | <b>1</b> | <b>-MQIFVK.T</b> <a href="#">196</a>                                                                                                                                          |
| <a href="#">1046</a>  | <b>520.7191</b> | <b>1039.4237</b> | <b>1038.5094</b> | <b>0.9143</b>  | <b>0</b> | <b>47</b> | <b>0.003</b>   | <b>1</b> | <b>K.EGIPPDQQR.L</b> <a href="#">1030</a> <a href="#">1037</a> <a href="#">1045</a>                                                                                           |
| <a href="#">1181</a>  | <b>534.5726</b> | <b>1067.1307</b> | <b>1066.6135</b> | <b>0.5172</b>  | <b>0</b> | <b>46</b> | <b>0.0035</b>  | <b>1</b> | <b>K.ESTLHLVLR.L</b> <a href="#">1191</a> <a href="#">1200</a>                                                                                                                |
| <a href="#">1261</a>  | <b>541.4061</b> | <b>1080.7977</b> | <b>1080.5451</b> | <b>0.2526</b>  | <b>0</b> | <b>39</b> | <b>0.017</b>   | <b>1</b> | <b>R.TLSDYNIQK.E</b> <a href="#">1257</a> <a href="#">1259</a> <a href="#">1263</a>                                                                                           |
| <a href="#">1577</a>  | 568.0741        | 1134.1337        | 1133.6808        | 0.4529         | 1        | 1         | 1.5e+02        | 9        | M.QIFVKTLTGK.T <a href="#">1579</a>                                                                                                                                           |
| <a href="#">4654</a>  | <b>762.6321</b> | <b>1523.2497</b> | <b>1522.7740</b> | <b>0.4758</b>  | <b>1</b> | <b>61</b> | <b>0.00011</b> | <b>1</b> | <b>K.IQDKEGIPPDQQR.L</b>                                                                                                                                                      |
| <a href="#">7449</a>  | <b>883.0766</b> | <b>1764.1387</b> | <b>1762.8836</b> | <b>1.2551</b>  | <b>0</b> | <b>30</b> | <b>0.13</b>    | <b>1</b> | <b>K.TITLEVESSDTIDNVK.S</b> <a href="#">7433</a> <a href="#">7437</a> <a href="#">7444</a> <a href="#">7445</a> <a href="#">7447</a> <a href="#">7448</a> <a href="#">745</a> |
| <a href="#">11336</a> | <b>738.2772</b> | <b>2211.8097</b> | <b>2212.2514</b> | <b>-0.4417</b> | <b>2</b> | <b>4</b>  | <b>51</b>      | <b>9</b> | <b>K.ESTLHLVLRRLRGGMQIFVK.T</b> <a href="#">11359</a>                                                                                                                         |

230. [gi|220691376|gb|EED47724.1|](#) Mass: 24940 Score: 116 Queries matched: 4 emPAI: 0.13

uracil phosphoribosyltransferase [Aspergillus flavus NRRL3357]

| Query | Observed | Mr(expt) | Mr(calc) | Delta | Miss | Score | Expect | Rank | Peptide |
|-------|----------|----------|----------|-------|------|-------|--------|------|---------|
|-------|----------|----------|----------|-------|------|-------|--------|------|---------|



[5857](#) 544.5995 1630.7767 1631.9029 -1.1262 1 8 25 2 [R.VVMLSVLGSETGIRR.A 5859](#)  
[16374](#) 1155.3642 3463.0707 3461.7638 1.3069 0 93 4.8e-08 1 [R.QDGSNTAAADTAILLDPIVATGATAEAAIHLR.E 16376](#)

231. [gi|220698520|gb|EED54860.1|](#) Mass: 47208 Score: 116 Queries matched: 19 emPAI: 0.14

stomatin family protein [Aspergillus flavus NRRL3357]

| Query                 | Observed | Mr(expt)  | Mr(calc)  | Delta  | Miss | Score | Expect  | Rank | Peptide                                                |
|-----------------------|----------|-----------|-----------|--------|------|-------|---------|------|--------------------------------------------------------|
| <a href="#">385</a>   | 431.1001 | 860.1857  | 858.5035  | 1.6822 | 1    | 14    | 8.9     | 9    | R.QSSRLLR.S                                            |
| <a href="#">1460</a>  | 559.9566 | 1117.8987 | 1116.5411 | 1.3576 | 0    | 20    | 1.7     | 1    | <a href="#">R.AEILDSEGQR.Q 1463</a>                    |
| <a href="#">1521</a>  | 565.0341 | 1128.0537 | 1126.5659 | 1.4879 | 0    | 3     | 91      | 3    | K.YVDAFSNLAK.E                                         |
| <a href="#">2006</a>  | 610.8511 | 1219.6877 | 1219.6230 | 0.0647 | 0    | 6     | 40      | 1    | <a href="#">K.QSVILASEAMR.Q</a>                        |
| <a href="#">2419</a>  | 637.8131 | 1273.6117 | 1272.6422 | 0.9695 | 1    | 5     | 52      | 5    | K.RAEILDSEGQR.Q                                        |
| <a href="#">3489</a>  | 694.8071 | 1387.5997 | 1386.7691 | 0.8306 | 2    | 3     | 96      | 4    | M.DVASRQSSRLLR.S <a href="#">3493</a>                  |
| <a href="#">4233</a>  | 738.3541 | 1474.6937 | 1472.7776 | 1.9161 | 0    | 6     | 40      | 1    | <a href="#">R.FVPQQTAWIVER.M</a>                       |
| <a href="#">6497</a>  | 840.6806 | 1679.3467 | 1679.0022 | 0.3446 | 0    | 62    | 8.6e-05 | 1    | <a href="#">R.ILEPGLAILIPFIDR.I 6503</a>               |
| <a href="#">9524</a>  | 663.7219 | 1988.1437 | 1988.0109 | 0.1328 | 1    | 3     | 68      | 9    | <a href="#">K.QSVILASEAMRQEQINR.A 9537</a>             |
| <a href="#">11984</a> | 769.6165 | 2305.8277 | 2303.0739 | 2.7538 | 0    | 37    | 0.022   | 1    | <a href="#">K.ASYGVEDA EYAI SQLAQT TMR.S</a>           |
| <a href="#">12562</a> | 798.4762 | 2392.4067 | 2392.3186 | 0.0881 | 1    | 8     | 19      | 2    | R.LLQNPRLPTSALTATNNLNSVR.R <a href="#">12571 12572</a> |
| <a href="#">14309</a> | 887.6952 | 2660.0637 | 2657.3231 | 2.7406 | 0    | 5     | 34      | 3    | R.ATLNTNITQAIN EAAQDWGVVCLR.Y <a href="#">14311</a>    |

232. [gi|220698443|gb|EED54783.1|](#) Mass: 35240 Score: 116 Queries matched: 14 emPAI: 0.09

translation initiation factor 2 alpha subunit, putative [Aspergillus flavus NRRL3357]

| Query                 | Observed  | Mr(expt)  | Mr(calc)  | Delta   | Miss | Score | Expect  | Rank | Peptide                                       |
|-----------------------|-----------|-----------|-----------|---------|------|-------|---------|------|-----------------------------------------------|
| <a href="#">464</a>   | 886.7790  | 885.7717  | 885.4807  | 0.2910  | 0    | 11    | 14      | 4    | R.VSPEDVIK.C                                  |
| <a href="#">1413</a>  | 555.3251  | 1108.6357 | 1108.5587 | 0.0771  | 0    | 11    | 12      | 5    | K.QIAEMGAYVK.L                                |
| <a href="#">1516</a>  | 564.6586  | 1127.3027 | 1125.7346 | 1.5682  | 2    | 9     | 22      | 9    | R.IRSIQKLIR.I                                 |
| <a href="#">5012</a>  | 520.2449  | 1557.7127 | 1557.7385 | -0.0258 | 0    | 7     | 32      | 3    | K.YPEVDSYVMVNVK.Q <a href="#">5002</a>        |
| <a href="#">8041</a>  | 909.3326  | 1816.6507 | 1815.9805 | 0.6703  | 0    | 72    | 9.2e-06 | 1    | <a href="#">K.LVAPPLYVLTSQCLDK.A 8042</a>     |
| <a href="#">8677</a>  | 944.1381  | 1886.2617 | 1885.8768 | 0.3849  | 0    | 3     | 65      | 3    | R.ADIEVTCFGYEGIDAVK.A                         |
| <a href="#">9387</a>  | 657.5512  | 1969.6317 | 1970.9367 | -1.3050 | 1    | 2     | 78      | 6    | <a href="#">K.AVTEHDDAALQELMEKR.E 9403</a>    |
| <a href="#">11546</a> | 748.6329  | 2242.8767 | 2242.0609 | 0.8158  | 1    | 11    | 10      | 1    | <a href="#">K.MAPKAVTEHDDAALQELMEK.R</a>      |
| <a href="#">12703</a> | 805.7775  | 2414.3107 | 2414.1570 | 0.1538  | 2    | 4     | 52      | 4    | <a href="#">K.MAPKAVTEHDDAALQELMEKR.E</a>     |
| <a href="#">12769</a> | 808.5929  | 2422.7567 | 2421.2685 | 1.4882  | 2    | 11    | 10      | 1    | <a href="#">K.LLEYDNIDGMILLSELSRRR.I</a>      |
| <a href="#">15747</a> | 1039.8675 | 3116.5807 | 3116.4293 | 0.1514  | 2    | 2     | 60      | 1    | <a href="#">-.MSLTNCRFYEEKYPEVDSYVMVNVK.Q</a> |

233. [gi|220691503|gb|EED47851.1|](#) Mass: 148535 Score: 115 Queries matched: 38 emPAI: 0.09

phosphoribosylformylglycinamide synthase [Aspergillus flavus NRRL3357]

| Query               | Observed | Mr(expt) | Mr(calc) | Delta   | Miss | Score | Expect | Rank | Peptide                                      |
|---------------------|----------|----------|----------|---------|------|-------|--------|------|----------------------------------------------|
| <a href="#">572</a> | 459.1906 | 916.3667 | 917.5117 | -1.1449 | 1    | 15    | 6.9    | 4    | K.RLVLM <del>DR</del> .D <a href="#">570</a> |
| <a href="#">806</a> | 492.7126 | 983.4107 | 983.6015 | -0.1908 | 0    | 8     | 21     | 7    | R.VLSLPAVASK.S <a href="#">803</a>           |

|                       |           |           |           |         |   |     |         |    |                                                                      |
|-----------------------|-----------|-----------|-----------|---------|---|-----|---------|----|----------------------------------------------------------------------|
| <a href="#">1105</a>  | 526.9226  | 1051.8307 | 1052.4523 | -0.6215 | 0 | 7   | 34      | 10 | R.NASEQYEGR.V                                                        |
| <a href="#">1904</a>  | 601.4066  | 1200.7987 | 1199.6258 | 1.1729  | 1 | 11  | 14      | 4  | R.DEGAVGRGSKPK.A                                                     |
| <a href="#">2936</a>  | 666.2616  | 1330.5087 | 1329.7115 | 0.7972  | 0 | 8   | 28      | 2  | R.TVMGGIASWLPK.A <a href="#">2934</a>                                |
| <a href="#">3079</a>  | 674.4926  | 1346.9707 | 1345.7064 | 1.2643  | 0 | (0) | 1.5e+02 | 9  | R.TVMGGIASWLPK.A                                                     |
| <a href="#">3628</a>  | 702.4546  | 1402.8947 | 1400.7511 | 2.1436  | 0 | 4   | 70      | 4  | R.TLLTEIDIGNGQK.E <a href="#">3631</a>                               |
| <a href="#">5058</a>  | 782.0786  | 1562.1427 | 1561.8208 | 0.3220  | 1 | 3   | 91      | 9  | K.LGISIPVGKDSMSMK.M                                                  |
| <a href="#">5577</a>  | 805.6566  | 1609.2987 | 1607.8492 | 1.4495  | 1 | 4   | 68      | 1  | R.SRGHAI AASIGAQDVR.A                                                |
| <a href="#">7431</a>  | 882.5676  | 1763.1207 | 1760.9131 | 2.2076  | 0 | 0   | 1.3e+02 | 2  | K.AGLAGYCVSDLQIPGLK.Q                                                |
| <a href="#">7562</a>  | 887.5851  | 1773.1557 | 1773.7735 | -0.6178 | 2 | 0   | 1.4e+02 | 1  | K.DSMSMKMKWTDEASK.Q                                                  |
| <a href="#">7907</a>  | 902.6591  | 1803.3037 | 1802.8331 | 0.4706  | 0 | 27  | 0.25    | 1  | R.SDGGLFTTLAEMMFAGR.C                                                |
| <a href="#">8202</a>  | 612.6759  | 1835.0057 | 1836.9511 | -1.9454 | 2 | 4   | 55      | 4  | K.LGISIPVGKDSMSMKM.W                                                 |
| <a href="#">8864</a>  | 635.6022  | 1903.7847 | 1904.9335 | -1.1488 | 0 | 6   | 37      | 3  | R.MAVAESLMNIAAADLVDR.L                                               |
| <a href="#">9192</a>  | 649.2549  | 1944.7427 | 1944.9033 | -0.1606 | 0 | 2   | 85      | 7  | R.AQEVINACTAMGDNNPIK.F                                               |
| <a href="#">9885</a>  | 676.9975  | 2027.9707 | 2026.0081 | 1.9626  | 0 | 3   | 62      | 1  | R.LEDVGETVLMFVDLSFGR.K <a href="#">9854</a>                          |
| <a href="#">10108</a> | 684.1649  | 2049.4727 | 2051.0575 | -1.5848 | 0 | 3   | 66      | 2  | K.DVVETLFTTELGAVFQVR.K                                               |
| <a href="#">10661</a> | 1062.2436 | 2122.4727 | 2121.0928 | 1.3799  | 0 | 37  | 0.023   | 1  | K.EVTAPMSLVISAFAPVGNR.K                                              |
| <a href="#">11031</a> | 724.5335  | 2170.5787 | 2170.0980 | 0.4807  | 1 | 7   | 24      | 2  | R.LEDVGETVLMFVDLSFGRK.T <a href="#">11018</a> <a href="#">11040</a>  |
| <a href="#">11259</a> | 1101.0466 | 2200.0787 | 2198.0903 | 1.9885  | 0 | 37  | 0.028   | 1  | R.TGTISPSSQATGIAHVCGLR.K                                             |
| <a href="#">11583</a> | 1126.3406 | 2250.6667 | 2250.1083 | 0.5585  | 2 | 8   | 19      | 3  | K.AQEWGDIGPWGRVYFYSARR.W <a href="#">11586</a> <a href="#">11599</a> |
| <a href="#">12918</a> | 815.0875  | 2442.2407 | 2440.3253 | 1.9154  | 0 | 53  | 0.00057 | 1  | R.DSTEYPKPIDLPLSVLFGKPK.M <a href="#">12919</a>                      |
| <a href="#">12946</a> | 816.7075  | 2447.1007 | 2446.1911 | 0.9096  | 1 | 1   | 84      | 8  | R.KTLGGSALAQVFNQVGDDCPDVR.D                                          |
| <a href="#">13067</a> | 823.1535  | 2466.4387 | 2464.2784 | 2.1603  | 1 | 1   | 1.1e+02 | 5  | K.QAKEVTAPMSLVISAFAPVGNR.K                                           |
| <a href="#">14767</a> | 914.6889  | 2741.0447 | 2741.5804 | -0.5356 | 2 | 3   | 51      | 5  | R.VLSLPAVASKSFLITIGDRTVGGLTAR.D                                      |
| <a href="#">14924</a> | 929.2685  | 2784.7837 | 2785.4433 | -0.6596 | 1 | 2   | 67      | 2  | R.DQMVGRWQTPVSDVAVTATALLQGVK.T <a href="#">14932</a>                 |
| <a href="#">16214</a> | 1122.1752 | 3363.5037 | 3365.5002 | -1.9965 | 0 | 0   | 95      | 3  | K.LSANWMSASSHPGEGAAIYEAEEAIGMDLCPK.L                                 |

234. [gi|220701006|gb|EED57344.1|](#) Mass: 29127 Score: 115 Queries matched: 8 emPAI: 0.11

6-phosphogluconolactonase, putative [Aspergillus flavus NRRL3357]

| Query                 | Observed  | Mr(expt)  | Mr(calc)  | Delta   | Miss | Score | Expect  | Rank | Peptide                                 |
|-----------------------|-----------|-----------|-----------|---------|------|-------|---------|------|-----------------------------------------|
| <a href="#">47</a>    | 676.4920  | 675.4847  | 674.3136  | 1.1711  | 0    | 6     | 59      | 4    | R.HDTFR.V <a href="#">46</a>            |
| <a href="#">783</a>   | 978.9500  | 977.9427  | 977.5546  | 0.3882  | 1    | 13    | 7.7     | 6    | R.IFAAKDSVK.L                           |
| <a href="#">2642</a>  | 649.7966  | 1297.5787 | 1297.7606 | -0.1818 | 0    | 85    | 5.1e-07 | 1    | R.VAVSGGSLPTVLAK.A <a href="#">2647</a> |
| <a href="#">3684</a>  | 707.0866  | 1412.1587 | 1411.7307 | 0.4280  | 0    | 5     | 53      | 1    | R.ELPSALVNQGAGEK.V                      |
| <a href="#">9086</a>  | 644.3585  | 1930.0537 | 1929.9374 | 0.1163  | 0    | 1     | 1.1e+02 | 7    | K.VSWFTDHPAVEGVSFPR.R                   |
| <a href="#">16140</a> | 1109.0042 | 3323.9907 | 3323.6575 | 0.3332  | 1    | 2     | 51      | 2    | R.ELPSALVNQGAGEKVSWFTDHPAVEGVSFPR.R     |

235. [gi|220690479|gb|EED46828.1|](#) Mass: 27419 Score: 114 Queries matched: 29 emPAI: 0.77

60S ribosomal protein L8, putative [Aspergillus flavus NRRL3357]

| Query | Observed | Mr(expt) | Mr(calc) | Delta | Miss | Score | Expect | Rank | Peptide |
|-------|----------|----------|----------|-------|------|-------|--------|------|---------|
|-------|----------|----------|----------|-------|------|-------|--------|------|---------|

|                       |                 |                  |                  |               |   |     |               |    |                                                                                                                                                                         |
|-----------------------|-----------------|------------------|------------------|---------------|---|-----|---------------|----|-------------------------------------------------------------------------------------------------------------------------------------------------------------------------|
| <a href="#">37</a>    | 671.4990        | 670.4917         | 670.4126         | 0.0791        | 0 | 9   | 20            | 5  | K.AGLIAAR.R                                                                                                                                                             |
| <a href="#">408</a>   | <b>867.4640</b> | <b>866.4567</b>  | <b>866.4134</b>  | <b>0.0433</b> | 0 | 24  | 0.53          | 1  | R.TLDYAER.H <a href="#">409</a>                                                                                                                                         |
| <a href="#">724</a>   | <b>484.2881</b> | <b>966.5617</b>  | <b>965.4930</b>  | <b>1.0687</b> | 0 | 46  | <b>0.0034</b> | 1  | R.GSIFTANTR.L <a href="#">714</a> <a href="#">717</a> <a href="#">718</a>                                                                                               |
| <a href="#">844</a>   | <b>496.0951</b> | <b>990.1757</b>  | <b>988.5124</b>  | <b>1.6633</b> | 0 | 45  | 0.0062        | 1  | R.GMVGIVAGGGR.T <a href="#">841</a>                                                                                                                                     |
| <a href="#">2723</a>  | 654.6866        | 1307.3587        | 1306.7106        | 0.6482        | 2 | 5   | 49            | 10 | R.KGRGSIFTANTR.L                                                                                                                                                        |
| <a href="#">3749</a>  | <b>710.9881</b> | <b>1419.9617</b> | <b>1419.7253</b> | <b>0.2365</b> | 1 | 2   | <b>1e+02</b>  | 5  | K.STSRGMVGIVAGGGR.T                                                                                                                                                     |
| <a href="#">7135</a>  | 578.3402        | 1731.9987        | 1729.9621        | 2.0366        | 2 | (9) | 17            | 3  | K.VVKSTSRGMVGIVAGGGR.T                                                                                                                                                  |
| <a href="#">7268</a>  | 873.3316        | 1744.6487        | 1745.9571        | -1.3083       | 2 | 21  | 1.1           | 2  | K.VVKSTSRGMVGIVAGGGR.T <a href="#">7274</a> <a href="#">7279</a> <a href="#">7284</a> <a href="#">7285</a> <a href="#">7288</a> <a href="#">7289</a> <a href="#">72</a> |
| <a href="#">7747</a>  | <b>596.8912</b> | <b>1787.6517</b> | <b>1786.8486</b> | <b>0.8031</b> | 0 | 51  | <b>0.0011</b> | 1  | R.TSGNYVTVIGHNPEDGK.T <a href="#">7765</a>                                                                                                                              |
| <a href="#">11065</a> | <b>726.2189</b> | <b>2175.6347</b> | <b>2174.0188</b> | <b>1.6159</b> | 0 | 25  | <b>0.4</b>    | 1  | R.GVAMNPVDHPHGGGNHQHIGK.A                                                                                                                                               |
| <a href="#">13180</a> | <b>826.8119</b> | <b>2477.4137</b> | <b>2476.1733</b> | <b>1.2404</b> | 0 | 9   | <b>14</b>     | 1  | K.HVTETFIANEGMYTGQFIYAGK.N                                                                                                                                              |
| <a href="#">14167</a> | 880.7469        | 2639.2187        | 2640.3004        | -1.0817       | 2 | 1   | 1e+02         | 9  | K.AGDRGALGRTSGNYVTVIGHNPEDGK.T                                                                                                                                          |

236. [gi|220694246|gb|EED50590.1|](#) Mass: 101077 Score: 114 Queries matched: 42 emPAI: 0.10

Coatomer subunit gamma, putative [Aspergillus flavus NRRL3357]

| Query                 | Observed        | Mr(expt)         | Mr(calc)         | Delta          | Miss | Score | Expect         | Rank | Peptide                                          |
|-----------------------|-----------------|------------------|------------------|----------------|------|-------|----------------|------|--------------------------------------------------|
| <a href="#">1223</a>  | 537.7881        | 1073.5617        | 1074.6397        | -1.0780        | 1    | 23    | 0.87           | 4    | K.TGVTTKITVR.A <a href="#">1225</a>              |
| <a href="#">1988</a>  | <b>609.1961</b> | <b>1216.3777</b> | <b>1216.6564</b> | <b>-0.2787</b> | 1    | 9     | 21             | 10   | K.LFQNKDPSLR.Q                                   |
| <a href="#">2480</a>  | <b>640.4251</b> | <b>1278.8357</b> | <b>1280.7162</b> | <b>-1.8805</b> | 1    | 3     | 85             | 5    | R.VAALIKMAFSSK.T <a href="#">2481</a>            |
| <a href="#">2674</a>  | 651.6806        | 1301.3467        | 1301.7918        | -0.4451        | 2    | 10    | 18             | 10   | R.TKKLTTATPTLK.A <a href="#">2692</a>            |
| <a href="#">2732</a>  | 655.2951        | 1308.5757        | 1308.5867        | -0.0110        | 1    | 13    | 7.6            | 2    | K.KDEDADQTMIL.L                                  |
| <a href="#">2787</a>  | <b>658.5616</b> | <b>1315.1087</b> | <b>1314.7143</b> | <b>0.3944</b>  | 0    | 58    | <b>0.00029</b> | 1    | R.IIDATTVQGIER.L                                 |
| <a href="#">3405</a>  | <b>689.3296</b> | <b>1376.6447</b> | <b>1375.7646</b> | <b>0.8802</b>  | 0    | 5     | 54             | 3    | K.QAGMLAFLSGILR.D                                |
| <a href="#">4932</a>  | <b>517.7265</b> | <b>1550.1577</b> | <b>1548.7090</b> | <b>1.4488</b>  | 1    | 9     | 17             | 7    | K.DEDADQTMIKLDR.T <a href="#">4933</a>           |
| <a href="#">4978</a>  | <b>777.6381</b> | <b>1553.2617</b> | <b>1552.7200</b> | <b>0.5417</b>  | 0    | 2     | 83             | 2    | R.KPMMQMLDGWLR.H                                 |
| <a href="#">5189</a>  | 789.4206        | 1576.8267        | 1576.8647        | -0.0380        | 1    | 2     | 1e+02          | 9    | K.DPSLRQMVYLVLK.E                                |
| <a href="#">6528</a>  | 841.5241        | 1681.0337        | 1679.9458        | 1.0879         | 1    | 5     | 42             | 2    | K.LTTATPTLKAPSTGPPK.S                            |
| <a href="#">7023</a>  | <b>860.8326</b> | <b>1719.6507</b> | <b>1719.8904</b> | <b>-0.2397</b> | 1    | 5     | 45             | 7    | K.DTAVGSDVLYRANAIR.A                             |
| <a href="#">8217</a>  | 919.7316        | 1837.4487        | 1837.9794        | -0.5307        | 1    | 2     | 88             | 7    | R.MALVKMVQYGAAGVIK.S <a href="#">8222</a>        |
| <a href="#">8368</a>  | <b>618.6869</b> | <b>1853.0387</b> | <b>1851.0077</b> | <b>2.0311</b>  | 1    | 11    | 11             | 1    | K.FPSKQAGMLAFLSGILR.D <a href="#">8366</a>       |
| <a href="#">8536</a>  | 624.6612        | 1870.9617        | 1868.0441        | 2.9176         | 2    | 6     | 40             | 6    | R.VAALIKMAFSSKTGVTTK.I                           |
| <a href="#">9209</a>  | <b>650.2515</b> | <b>1947.7327</b> | <b>1948.8580</b> | <b>-1.1253</b> | 2    | (0)   | <b>1.3e+02</b> | 6    | - .MSYMKKDEDADQTMIL.L                            |
| <a href="#">9371</a>  | <b>656.8725</b> | <b>1967.5957</b> | <b>1964.8529</b> | <b>2.7428</b>  | 2    | 6     | 32             | 2    | - .MSYMKKDEDADQTMIL.L                            |
| <a href="#">9468</a>  | 990.5981        | 1979.1817        | 1980.9747        | -1.7930        | 0    | 7     | 27             | 8    | K.ELANTAEDVIMSTSIIMK.D <a href="#">9464</a>      |
| <a href="#">9622</a>  | <b>666.6602</b> | <b>1996.9587</b> | <b>1996.9697</b> | <b>-0.0109</b> | 0    | (4)   | 58             | 3    | K.ELANTAEDVIMSTSIIMK.D                           |
| <a href="#">10302</a> | <b>691.0722</b> | <b>2070.1947</b> | <b>2068.1317</b> | <b>2.0631</b>  | 0    | 49    | <b>0.0015</b>  | 1    | K.TPSVSSAALVSSYHLLPIAR.D <a href="#">10298</a>   |
| <a href="#">11388</a> | 740.2889        | 2217.8447        | 2218.0081        | -0.1634        | 2    | 7     | 27             | 3    | R.HKHEMVNFEEAKAICDMR.D <a href="#">11389</a>     |
| <a href="#">11487</a> | <b>745.5132</b> | <b>2233.5177</b> | <b>2234.1616</b> | <b>-0.6439</b> | 1    | 2     | 81             | 5    | R.AALNLRMLAEEDETASLFLK.N                         |
| <a href="#">11920</a> | <b>767.2069</b> | <b>2298.5987</b> | <b>2296.3366</b> | <b>2.2621</b>  | 2    | 1     | <b>1.1e+02</b> | 4    | R.IIDATTVQGIERLIKTAIVDK.T                        |
| <a href="#">12493</a> | <b>795.4075</b> | <b>2383.2007</b> | <b>2382.2179</b> | <b>0.9828</b>  | 0    | 30    | <b>0.11</b>    | 1    | R.DVTDAEASQAVHVLQLFLSSPR.A <a href="#">12501</a> |

|                       |           |           |           |         |   |     |       |    |                                                      |
|-----------------------|-----------|-----------|-----------|---------|---|-----|-------|----|------------------------------------------------------|
| <a href="#">12994</a> | 819.6245  | 2455.8517 | 2457.2474 | -1.3957 | 2 | 7   | 22    | 1  | K.QAGMLAFLSGILRDEGGYEFKR.S                           |
| <a href="#">14824</a> | 921.6705  | 2761.9897 | 2760.3945 | 1.5952  | 2 | 1   | 99    | 10 | K.FPSKQAGMLAFLSGILRDEGGYEFK.R                        |
| <a href="#">15279</a> | 973.8539  | 2918.5397 | 2918.3790 | 0.1607  | 2 | 2   | 68    | 4  | K.TGNEASVDRLMKQISGF <sup>+</sup> MADITDEFK.I         |
| <a href="#">15319</a> | 980.2552  | 2937.7437 | 2939.5421 | -1.7984 | 1 | (0) | 1e+02 | 8  | R.QMVYLVLKELANTAEDVIMSTSIIMK.D                       |
| <a href="#">15365</a> | 986.2965  | 2955.8677 | 2955.5370 | 0.3307  | 1 | (1) | 80    | 10 | R.QMVYLVLKELANTAEDVIMSTSIIMK.D <a href="#">15369</a> |
| <a href="#">15429</a> | 1494.4761 | 2986.9377 | 2987.5269 | -0.5892 | 1 | 2   | 63    | 1  | R.QMVYLVLKELANTAEDVIMSTSIIMK.D <a href="#">15428</a> |

237. [gi|220696195|gb|EED52537.1|](#) Mass: 36152 Score: 114 Queries matched: 18 emPAI: 0.09

glyceraldehyde 3-phosphate dehydrogenase, putative [Aspergillus flavus NRRL3357]

| Query                 | Observed  | Mr(expt)  | Mr(calc)  | Delta   | Miss | Score | Expect  | Rank | Peptide                                                                          |
|-----------------------|-----------|-----------|-----------|---------|------|-------|---------|------|----------------------------------------------------------------------------------|
| <a href="#">275</a>   | 410.7816  | 819.5487  | 818.4399  | 1.1088  | 0    | 18    | 3.1     | 2    | K.VGINGFGR.I <a href="#">276</a>                                                 |
| <a href="#">1456</a>  | 559.6141  | 1117.2137 | 1118.6196 | -1.4059 | 1    | 3     | 85      | 10   | M.TAKVGINGFGR.I                                                                  |
| <a href="#">2212</a>  | 625.8261  | 1249.6377 | 1249.6601 | -0.0224 | 1    | 2     | 1e+02   | 2    | -.MTAKVGINGFGR.I                                                                 |
| <a href="#">6283</a>  | 832.5116  | 1663.0087 | 1663.9032 | -0.8945 | 1    | 0     | 1.5e+02 | 4    | R.LEKGASYEEIITAIE.E                                                              |
| <a href="#">6440</a>  | 838.1911  | 1674.3677 | 1673.7474 | 0.6203  | 0    | 69    | 2e-05   | 1    | K.IVSWYDNEWGYSR.R <a href="#">6443</a> <a href="#">6445</a> <a href="#">6454</a> |
| <a href="#">7939</a>  | 603.2995  | 1806.8767 | 1804.9512 | 1.9256  | 2    | 4     | 52      | 1    | K.VKFYAEKDPANIPWK.E                                                              |
| <a href="#">9866</a>  | 676.5872  | 2026.7397 | 2024.1127 | 2.6271  | 2    | 7     | 28      | 5    | R.GGRAAAQNLI <sup>+</sup> PSSSTGAAKAVGK.V <a href="#">9832</a>                   |
| <a href="#">9997</a>  | 1020.1366 | 2038.2587 | 2038.0194 | 0.2393  | 0    | 2     | 85      | 7    | K.FGVVEGLMTAVHAYTATQK.L                                                          |
| <a href="#">10559</a> | 702.8109  | 2105.4107 | 2107.0329 | -1.6222 | 0    | 4     | 55      | 1    | K.VIISAPSADAPMYVMGVNEK.T                                                         |
| <a href="#">11406</a> | 741.5292  | 2221.5657 | 2219.1330 | 2.4327  | 1    | 17    | 2.4     | 2    | K.KVIISAPSADAPMYVMGVNEK.T <a href="#">11403</a>                                  |
| <a href="#">13709</a> | 851.0225  | 2550.0457 | 2548.3029 | 1.7428  | 2    | 8     | 20      | 1    | K.GGAKKVIISAPSADAPMYVMGVNEK.T <a href="#">13707</a>                              |

238. [gi|220699259|gb|EED55598.1|](#) Mass: 17822 Score: 111 Queries matched: 24 emPAI: 1.38

ubiquitin UbiA, putative [Aspergillus flavus NRRL3357]

| Query                 | Observed | Mr(expt)  | Mr(calc)  | Delta  | Miss | Score | Expect  | Rank | Peptide                                                                      |
|-----------------------|----------|-----------|-----------|--------|------|-------|---------|------|------------------------------------------------------------------------------|
| <a href="#">22</a>    | 324.9441 | 647.8737  | 647.4006  | 0.4731 | 0    | 27    | 0.46    | 1    | R.LIFAGK.Q <a href="#">20</a> <a href="#">23</a> <a href="#">24</a>          |
| <a href="#">564</a>   | 458.1891 | 914.3637  | 912.5280  | 1.8357 | 0    | 14    | 7.5     | 9    | R.GGIIEPSLK.A                                                                |
| <a href="#">1046</a>  | 520.7191 | 1039.4237 | 1038.5094 | 0.9143 | 0    | 47    | 0.003   | 1    | K.EGIPPDQQR.L <a href="#">1030</a> <a href="#">1037</a> <a href="#">1045</a> |
| <a href="#">1181</a>  | 534.5726 | 1067.1307 | 1066.6135 | 0.5172 | 0    | 46    | 0.0035  | 1    | K.ESTLHLVLR.L <a href="#">1191</a> <a href="#">1200</a>                      |
| <a href="#">1261</a>  | 541.4061 | 1080.7977 | 1080.5451 | 0.2526 | 0    | 39    | 0.017   | 1    | R.TLSDYNIQK.E <a href="#">1257</a> <a href="#">1259</a> <a href="#">1263</a> |
| <a href="#">1871</a>  | 597.9671 | 1193.9197 | 1193.6842 | 0.2355 | 1    | 1     | 1.1e+02 | 1    | R.KIATMQIFVK.T                                                               |
| <a href="#">3004</a>  | 670.1771 | 1338.3397 | 1337.6986 | 0.6411 | 1    | 5     | 45      | 2    | K.KCGHTNQLRPK.K <a href="#">2999</a>                                         |
| <a href="#">4654</a>  | 762.6321 | 1523.2497 | 1522.7740 | 0.4758 | 1    | 61    | 0.00011 | 1    | K.IQDKEGIPPDQQR.L                                                            |
| <a href="#">6498</a>  | 840.7491 | 1679.4837 | 1677.9851 | 1.4986 | 2    | (0)   | 1.4e+02 | 6    | R.KIATMQIFVKTLTGK.T                                                          |
| <a href="#">6734</a>  | 566.0569 | 1695.1487 | 1693.9801 | 1.1687 | 2    | 1     | 1.1e+02 | 7    | R.KIATMQIFVKTLTGK.T                                                          |
| <a href="#">7312</a>  | 876.0036 | 1749.9927 | 1748.8680 | 1.1247 | 0    | 7     | 28      | 3    | K.TITLDVSSDTIDNVK.A                                                          |
| <a href="#">13120</a> | 824.5232 | 2470.5477 | 2468.3235 | 2.2243 | 1    | 2     | 80      | 2    | M.VKLSVIASSDQPDLSAIVSQQR.K                                                   |

239. [gi|220694536|gb|EED50880.1|](#) Mass: 56754 Score: 111 Queries matched: 21 emPAI: 0.25

V-type ATPase, B subunit, putative [Aspergillus flavus NRRL3357]

| Query                 | Observed        | Mr(expt)         | Mr(calc)         | Delta          | Miss     | Score     | Expect         | Rank     | Peptide                                                |
|-----------------------|-----------------|------------------|------------------|----------------|----------|-----------|----------------|----------|--------------------------------------------------------|
| <a href="#">930</a>   | <b>507.4951</b> | <b>1012.9757</b> | <b>1011.5025</b> | <b>1.4732</b>  | <b>0</b> | <b>16</b> | <b>4</b>       | <b>1</b> | <b>R.VLDEFYAR.S</b> <a href="#">933</a>                |
| <a href="#">1181</a>  | 534.5726        | 1067.1307        | 1066.4753        | 0.6554         | 0        | 15        | 5.2            | 4        | -.MASEFVDPR.M <a href="#">1176</a>                     |
| <a href="#">1808</a>  | <b>591.7641</b> | <b>1181.5137</b> | <b>1181.5863</b> | <b>-0.0725</b> | <b>1</b> | <b>6</b>  | <b>40</b>      | <b>3</b> | <b>K.YAIGRDAAAMK.A</b>                                 |
| <a href="#">2968</a>  | 668.1916        | 1334.3687        | 1333.7136        | 0.6551         | 2        | 9         | 20             | 7        | R.LMKSAIGEGRTR.K                                       |
| <a href="#">3437</a>  | <b>691.6226</b> | <b>1381.2307</b> | <b>1381.7493</b> | <b>-0.5186</b> | <b>1</b> | <b>4</b>  | <b>67</b>      | <b>7</b> | <b>K.LSLEFLEKFEK.T</b>                                 |
| <a href="#">6492</a>  | <b>840.2651</b> | <b>1678.5157</b> | <b>1677.8726</b> | <b>0.6431</b>  | <b>0</b> | <b>35</b> | <b>0.044</b>   | <b>1</b> | <b>R.SIYDSLDIAWNLLR.I</b>                              |
| <a href="#">6998</a>  | <b>859.2126</b> | <b>1716.4107</b> | <b>1714.9254</b> | <b>1.4854</b>  | <b>0</b> | <b>74</b> | <b>6.2e-06</b> | <b>1</b> | <b>R.VTLFLNLANDP TIER.I</b>                            |
| <a href="#">9172</a>  | <b>648.3079</b> | <b>1941.9017</b> | <b>1943.8611</b> | <b>-1.9594</b> | <b>0</b> | <b>4</b>  | <b>54</b>      | <b>4</b> | <b>R.GYPGYMYTDLSTIYER.A</b>                            |
| <a href="#">10551</a> | 702.6072        | 2104.7997        | 2106.0746        | -1.2748        | 1        | 10        | 13             | 4        | K.FPRYNEIVSLTLPDGTTER.S <a href="#">10548</a>          |
| <a href="#">11230</a> | <b>732.7339</b> | <b>2195.1797</b> | <b>2193.1364</b> | <b>2.0433</b>  | <b>0</b> | <b>34</b> | <b>0.046</b>   | <b>1</b> | <b>K.IPIFSASGLPHNEIAAQICR.Q</b> <a href="#">11221</a>  |
| <a href="#">11329</a> | 738.1475        | 2211.4207        | 2212.0259        | -0.6052        | 1        | 3         | 59             | 4        | R.GYPGYMYTDLSTIYERAGR.V                                |
| <a href="#">11408</a> | <b>741.6059</b> | <b>2221.7957</b> | <b>2221.1161</b> | <b>0.6796</b>  | <b>2</b> | <b>0</b>  | <b>1.2e+02</b> | <b>2</b> | <b>K.LGVSEDMLGRVFDGSGRAIDK.G</b>                       |
| <a href="#">11984</a> | 769.6165        | 2305.8277        | 2305.1736        | 0.6541         | 2        | 2         | 87             | 3        | K.TKVEFSGHS LKLGVSEDMLGR.V                             |
| <a href="#">12600</a> | <b>800.9495</b> | <b>2399.8267</b> | <b>2397.1556</b> | <b>2.6712</b>  | <b>0</b> | <b>42</b> | <b>0.008</b>   | <b>1</b> | <b>R.VYPEEMISTGISAITMNSIAR.G</b> <a href="#">12585</a> |
| <a href="#">13014</a> | <b>820.8239</b> | <b>2459.4497</b> | <b>2458.2492</b> | <b>1.2005</b>  | <b>1</b> | <b>0</b>  | <b>1.1e+02</b> | <b>7</b> | <b>K.GPKVLAEDYLDINGQPINPYSR.V</b>                      |
| <a href="#">13920</a> | 862.7202        | 2585.1387        | 2582.4697        | 2.6691         | 2        | 5         | 39             | 3        | R.IRYNTIAGINGPLVILDNVKFPR.Y                            |

240. [gi|220698647|gb|EED54987.1|](#) Mass: 33238 Score: 110 Queries matched: 15 emPAI: 0.46

mitochondrial GTP/GDP transporter Ggcl, putative [Aspergillus flavus NRRL3357]

| Query                 | Observed         | Mr(expt)         | Mr(calc)         | Delta         | Miss     | Score     | Expect        | Rank     | Peptide                                                          |
|-----------------------|------------------|------------------|------------------|---------------|----------|-----------|---------------|----------|------------------------------------------------------------------|
| <a href="#">164</a>   | 760.4310         | 759.4237         | 758.4360         | 0.9877        | 0        | 1         | 2.1e+02       | 3        | K.LLMTGPK.L                                                      |
| <a href="#">2231</a>  | <b>627.4871</b>  | <b>1252.9597</b> | <b>1252.6122</b> | <b>0.3476</b> | <b>0</b> | <b>7</b>  | <b>30</b>     | <b>5</b> | <b>K.IISDEGMGLYR.G</b>                                           |
| <a href="#">2248</a>  | 628.6296         | 1255.2447        | 1254.7370        | 0.5078        | 1        | 11        | 12            | 3        | K.GLTPKLLMTGPK.L                                                 |
| <a href="#">4835</a>  | <b>771.8131</b>  | <b>1541.6117</b> | <b>1540.7674</b> | <b>0.8443</b> | <b>0</b> | <b>45</b> | <b>0.0048</b> | <b>1</b> | <b>R.NAPGSFALFGGSAFAK.E</b>                                      |
| <a href="#">5011</a>  | <b>520.2399</b>  | <b>1557.6977</b> | <b>1556.8522</b> | <b>0.8455</b> | <b>2</b> | <b>10</b> | <b>15</b>     | <b>1</b> | <b>M.SP AIAQAGSASKDVKK.E</b>                                     |
| <a href="#">5368</a>  | <b>796.8321</b>  | <b>1591.6497</b> | <b>1590.8082</b> | <b>0.8415</b> | <b>0</b> | <b>50</b> | <b>0.0014</b> | <b>1</b> | <b>K.FTSLFPGLGYAAGYK.V</b>                                       |
| <a href="#">5738</a>  | 811.6906         | 1621.3667        | 1619.8532        | 1.5135        | 2        | 7         | 28            | 5        | R.QTNPEAFRGRGLFK.I                                               |
| <a href="#">6184</a>  | 828.9726         | 1655.9307        | 1653.8297        | 2.1010        | 1        | 1         | 1.3e+02       | 3        | K.QVVFKEYANACLGR.K                                               |
| <a href="#">7020</a>  | 860.5981         | 1719.1817        | 1718.9032        | 0.2785        | 1        | 3         | 66            | 3        | R.KFTSLFPGLGYAAGYK.V                                             |
| <a href="#">8949</a>  | <b>639.1295</b>  | <b>1914.3667</b> | <b>1913.9121</b> | <b>0.4546</b> | <b>2</b> | <b>3</b>  | <b>66</b>     | <b>2</b> | <b>K.RLMSNQTRITSMEGMK.Q</b>                                      |
| <a href="#">9625</a>  | 999.9831         | 1997.9517        | 1998.9291        | -0.9774       | 1        | 2         | 94            | 4        | R.NFENPESGFRIVSNMMK.N                                            |
| <a href="#">12042</a> | <b>771.6852</b>  | <b>2312.0337</b> | <b>2309.2631</b> | <b>2.7706</b> | <b>0</b> | <b>39</b> | <b>0.017</b>  | <b>1</b> | <b>R.LLGS GTAGIAELLV FHPVDTTAK.R</b>                             |
| <a href="#">12048</a> | <b>771.8132</b>  | <b>2312.4177</b> | <b>2311.1498</b> | <b>1.2679</b> | <b>1</b> | <b>27</b> | <b>0.23</b>   | <b>1</b> | <b>R.GAGWTAARNAPGSFALFGGSAFAK.E</b>                              |
| <a href="#">15667</a> | <b>1028.3375</b> | <b>3081.9907</b> | <b>3080.6618</b> | <b>1.3289</b> | <b>2</b> | <b>4</b>  | <b>38</b>     | <b>1</b> | <b>K.ESATARLLGSGTAGIAELLV FHPVDTTAKR.L</b> <a href="#">15668</a> |

241. [gi|220701041|gb|EED57379.1|](#) Mass: 36927 Score: 110 Queries matched: 8 emPAI: 0.19

ARP2/3 complex 34 kDa subunit , putative [Aspergillus flavus NRRL3357]

| Query                 | Observed  | Mr(expt)  | Mr(calc)  | Delta   | Miss | Score | Expect  | Rank | Peptide                                                 |
|-----------------------|-----------|-----------|-----------|---------|------|-------|---------|------|---------------------------------------------------------|
| <a href="#">2288</a>  | 630.8176  | 1259.6207 | 1260.5921 | -0.9714 | 0    | 16    | 4.1     | 2    | K.EGGEVMAIHYR.E <a href="#">2291</a>                    |
| <a href="#">2950</a>  | 667.2506  | 1332.4867 | 1331.7310 | 0.7558  | 1    | 6     | 39      | 4    | K.RTADFLQVLNR.A                                         |
| <a href="#">4195</a>  | 736.2816  | 1470.5487 | 1469.8354 | 0.7133  | 0    | 39    | 0.019   | 1    | R.ALTLQNAQVLFNR.N <a href="#">4200</a>                  |
| <a href="#">12651</a> | 803.2799  | 2406.8177 | 2408.1430 | -1.3253 | 1    | 2     | 74      | 3    | K.YSTEAAPQGVKEGGEVMAIHYR.E                              |
| <a href="#">15631</a> | 1023.4542 | 3067.3407 | 3064.4666 | 2.8741  | 0    | 64    | 4.1e-05 | 1    | R.FSGSPPVSIDQIASDFDGVTFHLSTPESK.T <a href="#">15623</a> |

242. [gi|220699754|gb|EED56093.1|](#) Mass: 24240 Score: 109 Queries matched: 12 emPAI: 0.68

GTP-binding nuclear protein Ran, putative [Aspergillus flavus NRRL3357]

| Query                 | Observed | Mr(expt)  | Mr(calc)  | Delta   | Miss | Score | Expect  | Rank | Peptide                                                       |
|-----------------------|----------|-----------|-----------|---------|------|-------|---------|------|---------------------------------------------------------------|
| <a href="#">429</a>   | 874.5120 | 873.5047  | 873.4960  | 0.0087  | 0    | 4     | 89      | 1    | M.ATPIPTFK.L <a href="#">430</a>                              |
| <a href="#">952</a>   | 339.9125 | 1016.7157 | 1014.5710 | 2.1447  | 0    | 11    | 16      | 10   | K.LVLVGDGGTGK.T                                               |
| <a href="#">1977</a>  | 608.2726 | 1214.5307 | 1213.5979 | 0.9329  | 0    | 36    | 0.045   | 1    | K.NLQYYDISAK.S                                                |
| <a href="#">3023</a>  | 671.2071 | 1340.3997 | 1341.6928 | -1.2931 | 1    | 1     | 1.3e+02 | 10   | K.KNLQYYDISAK.S                                               |
| <a href="#">4585</a>  | 759.5126 | 1517.0107 | 1514.7585 | 2.2522  | 0    | 47    | 0.0034  | 1    | R.VCENIPIVLCGNK.V <a href="#">4558</a>                        |
| <a href="#">7726</a>  | 596.1679 | 1785.4817 | 1783.9046 | 1.5772  | 0    | 50    | 0.0014  | 1    | K.SNYNFEKPFPLWIAR.K <a href="#">7713</a> <a href="#">7728</a> |
| <a href="#">11410</a> | 741.7275 | 2222.1607 | 2223.9929 | -1.8322 | 0    | 4     | 46      | 3    | R.DGYIINGQCGIIMFDVTSR.I <a href="#">11412</a>                 |

243. [gi|45477378|gb|AY371490.1|\\_d](#) Mass: 2978547 Score: 108 Queries matched: 262 emPAI: 0.00

Aspergillus parasiticus aflatoxin pathway gene cluster, complete sequence

| Query               | Observed | Mr(expt) | Mr(calc) | Delta   | Miss | Score | Expect | Rank | Peptide                             |
|---------------------|----------|----------|----------|---------|------|-------|--------|------|-------------------------------------|
| <a href="#">61</a>  | 343.0916 | 684.1687 | 682.4126 | 1.7561  | 0    | 9     | 16     | 8    | R.IGQPLR.V                          |
| <a href="#">192</a> | 779.6050 | 778.5977 | 778.3102 | 0.2875  | 0    | 3     | 71     | 2    | R.CAMEPR.T                          |
| <a href="#">200</a> | 783.1270 | 782.1197 | 780.3766 | 1.7431  | 0    | 7     | 25     | 4    | K.YLENSR.A                          |
| <a href="#">312</a> | 837.1880 | 836.1807 | 836.4174 | -0.2367 | 1    | 6     | 38     | 6    | R.MKGSQTTR.Y                        |
| <a href="#">481</a> | 447.8351 | 893.6557 | 892.4151 | 1.2406  | 0    | 6     | 39     | 4    | R.DTNPGPHR.A                        |
| <a href="#">497</a> | 451.0531 | 900.0917 | 899.5804 | 0.5113  | 0    | 21    | 1.6    | 4    | K.SSVLLILR.T                        |
| <a href="#">523</a> | 454.5191 | 907.0237 | 907.4624 | -0.4387 | 1    | 7     | 33     | 8    | R.ARGGYTQR.V                        |
| <a href="#">539</a> | 911.6280 | 910.6207 | 911.3994 | -0.7786 | 0    | 8     | 22     | 4    | R.MFCPVSR.G <a href="#">547</a>     |
| <a href="#">543</a> | 456.4791 | 910.9437 | 911.5328 | -0.5891 | 0    | 7     | 26     | 9    | R.LPVDVELK.A                        |
| <a href="#">649</a> | 474.9836 | 947.9527 | 947.5440 | 0.4087  | 0    | 45    | 0.0053 | 1    | R.TQAAFGLIK.E                       |
| <a href="#">652</a> | 475.3541 | 948.6937 | 948.5253 | 0.1684  | 2    | 13    | 8.7    | 7    | R.FRSIRDR.M                         |
| <a href="#">723</a> | 967.5480 | 966.5407 | 966.4744 | 0.0663  | 1    | 2     | 87     | 2    | R.HGGRGPGSSR.L                      |
| <a href="#">724</a> | 484.2881 | 966.5617 | 965.4640 | 1.0977  | 0    | 13    | 6.7    | 6    | R.GETYLMPTQ.Q <a href="#">714</a>   |
| <a href="#">788</a> | 490.4151 | 978.8157 | 977.4600 | 1.3557  | 0    | (7)   | 30     | 3    | R.MGGSAGGSGIK.V                     |
| <a href="#">792</a> | 490.7691 | 979.5237 | 979.4757 | 0.0480  | 1    | 8     | 24     | 5    | R.SGLKSSGCGK.I                      |
| <a href="#">862</a> | 498.0806 | 994.1467 | 993.4550 | 0.6918  | 0    | 16    | 3.4    | 2    | R.MGGSAGGSGIK.V <a href="#">865</a> |
| <a href="#">873</a> | 499.3881 | 996.7617 | 995.5260 | 1.2357  | 2    | 5     | 44     | 4    | R.KSHRESPR.K                        |



|                      |                  |                  |                  |                |          |           |                |           |                                                                                 |
|----------------------|------------------|------------------|------------------|----------------|----------|-----------|----------------|-----------|---------------------------------------------------------------------------------|
| <a href="#">876</a>  | 500.1451         | 998.2757         | 997.5305         | 0.7452         | 1        | 3         | 70             | 8         | R.TPVTGPDRR.G                                                                   |
| <a href="#">879</a>  | 500.5621         | 999.1097         | 997.5305         | 1.5792         | 1        | 12        | 11             | 10        | R.EPTVGPSRR.A <a href="#">871</a> <a href="#">880</a>                           |
| <a href="#">901</a>  | 501.8581         | 1001.7017        | 1001.5328        | 0.1689         | 0        | 3         | 89             | 7         | R.VGCIIAVDR.D                                                                   |
| <a href="#">914</a>  | <b>503.9606</b>  | <b>1005.9067</b> | <b>1006.4946</b> | <b>-0.5879</b> | <b>0</b> | <b>1</b>  | <b>1.5e+02</b> | <b>8</b>  | <b>R.LYYVMFR.Q</b>                                                              |
| <a href="#">925</a>  | 506.2261         | 1010.4377        | 1010.5583        | -0.1205        | 2        | 9         | 17             | 10        | R.LTKKAYCK.J                                                                    |
| <a href="#">937</a>  | 1015.6040        | 1014.5967        | 1014.6437        | -0.0470        | 1        | 4         | 81             | 6         | R.VVLQTTVKK.A                                                                   |
| <a href="#">963</a>  | <b>510.9071</b>  | <b>1019.7997</b> | <b>1019.5553</b> | <b>0.2445</b>  | <b>0</b> | <b>7</b>  | <b>31</b>      | <b>4</b>  | <b>R.IFLHFTSR.R</b>                                                             |
| <a href="#">1004</a> | 516.8321         | 1031.6497        | 1031.5764        | 0.0734         | 0        | 15        | 5.9            | 5         | R.GPYILSNIR.G <a href="#">1005</a>                                              |
| <a href="#">1025</a> | 518.9821         | 1035.9497        | 1037.6233        | -1.6736        | 0        | 4         | 66             | 7         | R.NDVLPLVLR.S <a href="#">1024</a>                                              |
| <a href="#">1035</a> | <b>520.2396</b>  | <b>1038.4647</b> | <b>1037.5407</b> | <b>0.9241</b>  | <b>0</b> | <b>4</b>  | <b>62</b>      | <b>9</b>  | <b>R.LPGHQFPSR.N</b>                                                            |
| <a href="#">1049</a> | 521.6576         | 1041.3007        | 1039.6654        | 1.6353         | 1        | 4         | 57             | 8         | R.ALWRIILR.K                                                                    |
| <a href="#">1128</a> | 528.7416         | 1055.4687        | 1055.5975        | -0.1287        | 0        | 11        | 14             | 9         | R.EVNALLEIR.Q <a href="#">1141</a>                                              |
| <a href="#">1131</a> | <b>529.2196</b>  | <b>1056.4247</b> | <b>1056.5716</b> | <b>-0.1469</b> | <b>0</b> | <b>8</b>  | <b>26</b>      | <b>8</b>  | <b>K.FPNLNIPSR.S</b>                                                            |
| <a href="#">1170</a> | 533.7336         | 1065.4527        | 1065.5315        | -0.0788        | 1        | 9         | 21             | 2         | K.SPEVHGRER.D                                                                   |
| <a href="#">1208</a> | 536.3326         | 1070.6507        | 1072.4906        | -1.8399        | 1        | 12        | 11             | 5         | R.DPRCPCR.E <a href="#">1207</a>                                                |
| <a href="#">1223</a> | 537.7881         | 1073.5617        | 1073.5829        | -0.0212        | 0        | 16        | 4.8            | 7         | R.TLATNSGAALR.H <a href="#">1225</a>                                            |
| <a href="#">1356</a> | <b>550.6726</b>  | <b>1099.3307</b> | <b>1097.6418</b> | <b>1.6890</b>  | <b>2</b> | <b>2</b>  | <b>1.1e+02</b> | <b>10</b> | <b>R.GPGSSRLLR.I</b>                                                            |
| <a href="#">1380</a> | <b>552.9826</b>  | <b>1103.9507</b> | <b>1105.5451</b> | <b>-1.5944</b> | <b>1</b> | <b>8</b>  | <b>30</b>      | <b>1</b>  | <b>R.CWARLTGSR.E</b> <a href="#">1383</a>                                       |
| <a href="#">1424</a> | <b>1113.2920</b> | <b>1112.2847</b> | <b>1111.5622</b> | <b>0.7226</b>  | <b>0</b> | <b>1</b>  | <b>1.3e+02</b> | <b>9</b>  | <b>R.QPSAAGPSLER.E</b>                                                          |
| <a href="#">1468</a> | 560.5121         | 1119.0097        | 1118.5105        | 0.4992         | 1        | 11        | 14             | 4         | R.GDRDADAPFR.S <a href="#">1461</a> <a href="#">1476</a>                        |
| <a href="#">1496</a> | 562.6756         | 1123.3367        | 1122.5755        | 0.7612         | 2        | 2         | 1e+02          | 9         | R.RHGGRGPGSSR.L                                                                 |
| <a href="#">1585</a> | <b>1135.8250</b> | <b>1134.8177</b> | <b>1134.5153</b> | <b>0.3024</b>  | <b>0</b> | <b>3</b>  | <b>81</b>      | <b>4</b>  | <b>R.EDTGLASTDAR.R</b>                                                          |
| <a href="#">1617</a> | 571.2136         | 1140.4127        | 1140.5710        | -0.1582        | 0        | 7         | 29             | 6         | R.HTVDMAQALR.S                                                                  |
| <a href="#">1757</a> | <b>586.4286</b>  | <b>1170.8427</b> | <b>1172.6448</b> | <b>-1.8021</b> | <b>2</b> | <b>9</b>  | <b>21</b>      | <b>2</b>  | <b>R.IMKPKDNRR.L</b>                                                            |
| <a href="#">1779</a> | 588.7306         | 1175.4467        | 1174.4850        | 0.9617         | 0        | 12        | 10             | 4         | R.GEAEQADENGR.J                                                                 |
| <a href="#">1785</a> | <b>392.9785</b>  | <b>1175.9137</b> | <b>1175.7251</b> | <b>0.1886</b>  | <b>1</b> | <b>10</b> | <b>18</b>      | <b>6</b>  | <b>R.VLGQRVIHVR.R</b> <a href="#">1784</a>                                      |
| <a href="#">1843</a> | <b>595.2571</b>  | <b>1188.4997</b> | <b>1187.6775</b> | <b>0.8222</b>  | <b>1</b> | <b>11</b> | <b>15</b>      | <b>10</b> | <b>R.SWAVSRLLTR.Y</b>                                                           |
| <a href="#">1862</a> | <b>597.2761</b>  | <b>1192.5377</b> | <b>1193.6741</b> | <b>-1.1364</b> | <b>2</b> | <b>1</b>  | <b>1.2e+02</b> | <b>6</b>  | <b>K.TRGVDVVHRR.L</b>                                                           |
| <a href="#">1880</a> | 599.3471         | 1196.6797        | 1197.5659        | -0.8862        | 0        | 5         | 43             | 5         | R.SSTLCLTSSSR.S                                                                 |
| <a href="#">1949</a> | <b>606.3841</b>  | <b>1210.7537</b> | <b>1208.7465</b> | <b>2.0072</b>  | <b>1</b> | <b>19</b> | <b>1.6</b>     | <b>1</b>  | <b>R.ILSARPRQLR.A</b> <a href="#">1943</a>                                      |
| <a href="#">2036</a> | <b>613.9436</b>  | <b>1225.8727</b> | <b>1225.7506</b> | <b>0.1221</b>  | <b>2</b> | <b>6</b>  | <b>42</b>      | <b>6</b>  | <b>R.RAPKTINSVLK.V</b>                                                          |
| <a href="#">2308</a> | <b>421.5665</b>  | <b>1261.6777</b> | <b>1261.7619</b> | <b>-0.0841</b> | <b>2</b> | <b>10</b> | <b>16</b>      | <b>3</b>  | <b>R.QSPVRKVHALK.L</b>                                                          |
| <a href="#">2335</a> | <b>633.5566</b>  | <b>1265.0987</b> | <b>1262.6407</b> | <b>2.4580</b>  | <b>1</b> | <b>11</b> | <b>14</b>      | <b>1</b>  | <b>K.KYHAPFASSQK.V</b>                                                          |
| <a href="#">2353</a> | 423.0332         | 1266.0777        | 1265.5876        | 0.4901         | 1        | 11        | 12             | 3         | R.WTFGCRFHR.Q                                                                   |
| <a href="#">2400</a> | 425.0192         | 1272.0357        | 1270.5976        | 1.4382         | 1        | 5         | 50             | 5         | R.NMSKSSGFEIR.J                                                                 |
| <a href="#">2410</a> | 637.5166         | 1273.0187        | 1274.6289        | -1.6101        | 0        | 8         | 25             | 4         | R.LASSKPAPMSDR.A <a href="#">2413</a> <a href="#">2422</a> <a href="#">2460</a> |
| <a href="#">2431</a> | 638.7416         | 1275.4687        | 1276.5949        | -1.1262        | 0        | 13        | 9.1            | 3         | K.WQNGTFNSPAR.F <a href="#">2445</a>                                            |
| <a href="#">2494</a> | <b>641.4686</b>  | <b>1280.9227</b> | <b>1279.6846</b> | <b>1.2381</b>  | <b>0</b> | <b>4</b>  | <b>64</b>      | <b>4</b>  | <b>R.TMQVYALVVEK.J</b>                                                          |
| <a href="#">2505</a> | <b>642.4211</b>  | <b>1282.8277</b> | <b>1282.6591</b> | <b>0.1686</b>  | <b>0</b> | <b>5</b>  | <b>49</b>      | <b>9</b>  | <b>R.AMVDIHDLELK.C</b>                                                          |
| <a href="#">2574</a> | <b>646.2251</b>  | <b>1290.4357</b> | <b>1289.7052</b> | <b>0.7306</b>  | <b>1</b> | <b>1</b>  | <b>1.2e+02</b> | <b>6</b>  | <b>R.SLSSSTVLGQRR.R</b>                                                         |
| <a href="#">2582</a> | <b>646.5446</b>  | <b>1291.0747</b> | <b>1291.6772</b> | <b>-0.6025</b> | <b>0</b> | <b>12</b> | <b>9.6</b>     | <b>2</b>  | <b>R.AIGSFVDQITNK.Y</b>                                                         |

|                      |                 |                  |                  |                |          |           |                |           |                                               |
|----------------------|-----------------|------------------|------------------|----------------|----------|-----------|----------------|-----------|-----------------------------------------------|
| <a href="#">2595</a> | <b>647.5476</b> | <b>1293.0807</b> | <b>1291.6521</b> | <b>1.4287</b>  | <b>1</b> | <b>1</b>  | <b>1.3e+02</b> | <b>6</b>  | <b>R.YSSPPSKQVGSR.T</b>                       |
| <a href="#">2617</a> | 648.5756        | 1295.1367        | 1295.6002        | -0.4635        | 0        | 5         | 46             | 3         | K.ELSGGMAMFPTR.S                              |
| <a href="#">2708</a> | 436.1892        | 1305.5457        | 1305.6612        | -0.1155        | 1        | 4         | 67             | 4         | K.LFPSRAACTQR.S                               |
| <a href="#">2733</a> | 655.3016        | 1308.5887        | 1308.7190        | -0.1303        | 0        | 8         | 27             | 5         | K.FLLNQPVPEPPR.N                              |
| <a href="#">2801</a> | <b>659.2111</b> | <b>1316.4077</b> | <b>1315.7096</b> | <b>0.6982</b>  | <b>0</b> | <b>28</b> | <b>0.25</b>    | <b>1</b>  | <b>K.NAITLSGSPSTLR.A</b>                      |
| <a href="#">2830</a> | <b>660.6361</b> | <b>1319.2577</b> | <b>1320.7150</b> | <b>-1.4573</b> | <b>0</b> | <b>8</b>  | <b>25</b>      | <b>6</b>  | <b>R.SSPGKPAASPIGPR.J</b>                     |
| <a href="#">2894</a> | 664.6071        | 1327.1997        | 1328.6071        | -1.4074        | 0        | 8         | 26             | 3         | R.GWGSALMEFSTK.V                              |
| <a href="#">2896</a> | <b>664.6366</b> | <b>1327.2587</b> | <b>1326.6979</b> | <b>0.5608</b>  | <b>2</b> | <b>4</b>  | <b>64</b>      | <b>6</b>  | <b>R.KGFHMPERGLR.E</b>                        |
| <a href="#">2898</a> | 664.6766        | 1327.3387        | 1325.6225        | 1.7162         | 1        | 3         | 83             | 8         | R.LSDSHGDFHRR.R <a href="#">2884</a>          |
| <a href="#">3047</a> | 672.3231        | 1342.6317        | 1343.6906        | -1.0588        | 0        | 7         | 37             | 4         | R.AAGSSLQSSQRPR.L                             |
| <a href="#">3061</a> | 673.1676        | 1344.3207        | 1341.6889        | 2.6319         | 0        | 4         | 77             | 6         | R.AGLVPDTPSTQR.D                              |
| <a href="#">3091</a> | <b>450.3429</b> | <b>1348.0067</b> | <b>1346.6718</b> | <b>1.3349</b>  | <b>0</b> | <b>10</b> | <b>17</b>      | <b>1</b>  | <b>R.ADSPTEFTAPLAK.G</b>                      |
| <a href="#">3130</a> | <b>676.6396</b> | <b>1351.2647</b> | <b>1350.7040</b> | <b>0.5608</b>  | <b>0</b> | <b>5</b>  | <b>47</b>      | <b>8</b>  | <b>K.CSPIMIQLVK.E</b>                         |
| <a href="#">3155</a> | <b>678.1886</b> | <b>1354.3627</b> | <b>1354.5862</b> | <b>-0.2234</b> | <b>1</b> | <b>0</b>  | <b>1.5e+02</b> | <b>7</b>  | <b>K.QDNHSGDPSDRK.I</b>                       |
| <a href="#">3162</a> | 452.7699        | 1355.2877        | 1356.6469        | -1.3592        | 0        | 7         | 32             | 10        | R.SSHPGVHHC AIR.R                             |
| <a href="#">3183</a> | 679.6256        | 1357.2367        | 1355.7673        | 1.4694         | 1        | 0         | 1.6e+02        | 9         | K.RITIALVDNWR.J                               |
| <a href="#">3195</a> | 680.2316        | 1358.4487        | 1357.7024        | 0.7464         | 1        | 6         | 44             | 6         | K.KLQAEGCQSLPK.L                              |
| <a href="#">3207</a> | <b>454.0879</b> | <b>1359.2417</b> | <b>1356.7765</b> | <b>2.4652</b>  | <b>0</b> | <b>5</b>  | <b>53</b>      | <b>7</b>  | <b>R.QVLTPPSLALYR.L</b>                       |
| <a href="#">3229</a> | <b>681.5501</b> | <b>1361.0857</b> | <b>1361.6986</b> | <b>-0.6129</b> | <b>1</b> | <b>0</b>  | <b>1.5e+02</b> | <b>10</b> | <b>R.SCPPAPHSVRVR.Q</b>                       |
| <a href="#">3316</a> | 457.6419        | 1369.9037        | 1368.7296        | 1.1741         | 1        | 4         | 64             | 8         | R.AIPASGRPGAGKCK.L                            |
| <a href="#">3318</a> | <b>685.9786</b> | <b>1369.9427</b> | <b>1367.6140</b> | <b>2.3287</b>  | <b>0</b> | <b>4</b>  | <b>60</b>      | <b>1</b>  | <b>R.GGVQMSPTFTGR.G</b> <a href="#">3310</a>  |
| <a href="#">3324</a> | <b>686.0786</b> | <b>1370.1427</b> | <b>1368.7586</b> | <b>1.3841</b>  | <b>2</b> | <b>4</b>  | <b>67</b>      | <b>2</b>  | <b>R.STRHRAGTAATLK.I</b>                      |
| <a href="#">3326</a> | 686.1251        | 1370.2357        | 1370.6911        | -0.4554        | 1        | 3         | 84             | 3         | R.CQRGTHAMLAVK.A                              |
| <a href="#">3410</a> | 460.0165        | 1377.0277        | 1377.6646        | -0.6368        | 0        | 11        | 13             | 2         | R.AMRPFPNTCIR.R <a href="#">3425</a>          |
| <a href="#">3447</a> | <b>692.3251</b> | <b>1382.6357</b> | <b>1379.7826</b> | <b>2.8531</b>  | <b>2</b> | <b>2</b>  | <b>95</b>      | <b>7</b>  | <b>R.FARFSARWVLK.M</b>                        |
| <a href="#">3563</a> | <b>698.6031</b> | <b>1395.1917</b> | <b>1395.7583</b> | <b>-0.5665</b> | <b>1</b> | <b>3</b>  | <b>76</b>      | <b>7</b>  | <b>R.QNQSTSHLVKVR.S</b>                       |
| <a href="#">3871</a> | <b>717.5636</b> | <b>1433.1127</b> | <b>1430.7340</b> | <b>2.3787</b>  | <b>1</b> | <b>3</b>  | <b>76</b>      | <b>1</b>  | <b>R.QCLANTAPGPKFK.R</b>                      |
| <a href="#">3892</a> | <b>479.8562</b> | <b>1436.5467</b> | <b>1437.7075</b> | <b>-1.1607</b> | <b>1</b> | <b>9</b>  | <b>18</b>      | <b>3</b>  | <b>K.YFGDSPMPKPRK.D</b>                       |
| <a href="#">3949</a> | 722.2026        | 1442.3907        | 1441.6984        | 0.6924         | 1        | 8         | 21             | 4         | R.LTPGGMTRSSYTR.G <a href="#">3957</a>        |
| <a href="#">3951</a> | <b>722.2191</b> | <b>1442.4237</b> | <b>1441.7776</b> | <b>0.6461</b>  | <b>0</b> | <b>32</b> | <b>0.095</b>   | <b>1</b>  | <b>R.VEGLQAVLEESLR.L</b> <a href="#">3947</a> |
| <a href="#">4000</a> | <b>724.5336</b> | <b>1447.0527</b> | <b>1448.7960</b> | <b>-1.7433</b> | <b>2</b> | <b>2</b>  | <b>1.1e+02</b> | <b>9</b>  | <b>R.LHAPRLSGAERSR.E</b>                      |
| <a href="#">4167</a> | 489.8612        | 1466.5617        | 1463.6094        | 2.9523         | 0        | 4         | 56             | 5         | R.MALMSTYEAMER.A                              |
| <a href="#">4269</a> | 739.6666        | 1477.3187        | 1475.7692        | 1.5495         | 2        | 15        | 5.3            | 2         | K.DGSSPSRSRSSLIK.L                            |
| <a href="#">4293</a> | 494.3592        | 1480.0557        | 1479.7425        | 0.3132         | 1        | 1         | 1.1e+02        | 7         | R.AMTDNGIKCTLLK.L                             |
| <a href="#">4299</a> | <b>741.6056</b> | <b>1481.1967</b> | <b>1480.7166</b> | <b>0.4801</b>  | <b>0</b> | <b>1</b>  | <b>1.1e+02</b> | <b>3</b>  | <b>R.AVANPMPDAPPVMR.A</b>                     |
| <a href="#">4340</a> | 496.4349        | 1486.2827        | 1486.8872        | -0.6044        | 1        | 4         | 57             | 9         | R.QVKSVTIVPFLTR.M                             |
| <a href="#">4424</a> | <b>500.1452</b> | <b>1497.4137</b> | <b>1497.7684</b> | <b>-0.3546</b> | <b>0</b> | <b>3</b>  | <b>79</b>      | <b>9</b>  | <b>K.LNFMLGITIGMTR.L</b>                      |
| <a href="#">4450</a> | 751.6521        | 1501.2897        | 1502.8470        | -1.5573        | 2        | 4         | 69             | 4         | R.RRYSGIWPLSLR.W                              |
| <a href="#">4467</a> | <b>501.8579</b> | <b>1502.5517</b> | <b>1502.9521</b> | <b>-0.4004</b> | <b>2</b> | <b>1</b>  | <b>1.2e+02</b> | <b>8</b>  | <b>K.RPIRIEUVPLRR.T</b>                       |
| <a href="#">4649</a> | <b>762.5226</b> | <b>1523.0307</b> | <b>1524.7950</b> | <b>-1.7642</b> | <b>0</b> | <b>3</b>  | <b>73</b>      | <b>1</b>  | <b>R.AGWLLAEHGRPYR.S</b>                      |
| <a href="#">4872</a> | 515.9292        | 1544.7657        | 1544.7446        | 0.0211         | 0        | 3         | 88             | 9         | R.TQHVFMFSTYLR.Q                              |

|                      |                 |                  |                  |                |          |           |                |           |                                                                  |
|----------------------|-----------------|------------------|------------------|----------------|----------|-----------|----------------|-----------|------------------------------------------------------------------|
| <a href="#">4947</a> | 776.3946        | 1550.7747        | 1549.7527        | 1.0220         | 2        | 4         | 55             | 5         | K.TRDLHMMRSLMK.Q                                                 |
| <a href="#">4972</a> | 518.5735        | 1552.6987        | 1549.7961        | 2.9026         | 2        | 8         | 21             | 10        | R.LDRGEGATAYVSRR.H <a href="#">4962</a> <a href="#">4967</a>     |
| <a href="#">5086</a> | 784.1451        | 1566.2757        | 1565.8348        | 0.4409         | 2        | 6         | 34             | 2         | R.GGRVSLGASSFCKIK.K <a href="#">5091</a>                         |
| <a href="#">5156</a> | <b>525.1765</b> | <b>1572.5077</b> | <b>1571.7878</b> | <b>0.7199</b>  | <b>1</b> | <b>4</b>  | <b>54</b>      | <b>8</b>  | <b>R.FSPPIDQSRICPR.V</b>                                         |
| <a href="#">5189</a> | 789.4206        | 1576.8267        | 1574.8317        | 1.9950         | 2        | 2         | 1e+02          | 8         | R.LTNNKYPWLRDR.C                                                 |
| <a href="#">5285</a> | 793.3386        | 1584.6627        | 1583.9049        | 0.7579         | 0        | 3         | 81             | 4         | R.FAGRVPQLPPPHLR.I                                               |
| <a href="#">5342</a> | 530.7162        | 1589.1267        | 1590.8783        | -1.7516        | 1        | 7         | 32             | 5         | R.LWIHPLRSYPGPR.W                                                |
| <a href="#">5374</a> | 531.7742        | 1592.3007        | 1593.8297        | -1.5290        | 0        | 7         | 30             | 4         | R.SSHIVALSAHVGASMK.T                                             |
| <a href="#">5713</a> | <b>810.8121</b> | <b>1619.6097</b> | <b>1618.8283</b> | <b>0.7814</b>  | <b>0</b> | <b>0</b>  | <b>1.3e+02</b> | <b>4</b>  | <b>K.TRPINTCAMLISSR.G</b>                                        |
| <a href="#">5723</a> | 541.1115        | 1620.3127        | 1621.8536        | -1.5409        | 1        | 3         | 79             | 9         | K.AVSESELHTQIPRR.K                                               |
| <a href="#">5755</a> | <b>812.4071</b> | <b>1622.7997</b> | <b>1623.8113</b> | <b>-1.0115</b> | <b>1</b> | <b>1</b>  | <b>1.2e+02</b> | <b>10</b> | <b>K.SIKELSGGMAMFPTR.S</b>                                       |
| <a href="#">5847</a> | <b>544.2292</b> | <b>1629.6657</b> | <b>1630.7812</b> | <b>-1.1155</b> | <b>1</b> | <b>5</b>  | <b>45</b>      | <b>3</b>  | <b>R.DAAHVSSRAWSTSTR.G</b>                                       |
| <a href="#">5862</a> | 544.7409        | 1631.2007        | 1632.8366        | -1.6358        | 2        | 6         | 38             | 6         | K.RQGSTSISKPECKR.J                                               |
| <a href="#">6106</a> | 826.0336        | 1650.0527        | 1650.7647        | -0.7119        | 0        | 2         | 87             | 7         | R.SCVPATASAPWFMAR.F                                              |
| <a href="#">6120</a> | 826.6636        | 1651.3127        | 1651.8682        | -0.5555        | 1        | 0         | 1.4e+02        | 6         | R.NTLFNSSFAPRALSK.S                                              |
| <a href="#">6139</a> | 551.7172        | 1652.1297        | 1651.8253        | 0.3044         | 1        | 7         | 31             | 10        | R.SPWAKLGSGCHPSLR.C                                              |
| <a href="#">6293</a> | <b>555.6029</b> | <b>1663.7867</b> | <b>1662.8438</b> | <b>0.9429</b>  | <b>2</b> | <b>4</b>  | <b>65</b>      | <b>8</b>  | <b>R.ISGGDGFTSRRGSPA.K.T</b>                                     |
| <a href="#">6325</a> | <b>834.2531</b> | <b>1666.4917</b> | <b>1665.8111</b> | <b>0.6807</b>  | <b>0</b> | <b>3</b>  | <b>71</b>      | <b>2</b>  | <b>R.ILHGWADEDSSALPR.C</b>                                       |
| <a href="#">6477</a> | <b>839.6716</b> | <b>1677.3287</b> | <b>1675.8318</b> | <b>1.4969</b>  | <b>1</b> | <b>4</b>  | <b>60</b>      | <b>2</b>  | <b>R.HADGIVYGRDFVEAK.J</b>                                       |
| <a href="#">6488</a> | <b>840.1981</b> | <b>1678.3817</b> | <b>1677.9124</b> | <b>0.4694</b>  | <b>1</b> | <b>5</b>  | <b>46</b>      | <b>3</b>  | <b>R.TCLPSFTELRLIK.S</b>                                         |
| <a href="#">6702</a> | 847.1501        | 1692.2857        | 1691.9220        | 0.3637         | 1        | 5         | 47             | 2         | R.DLQRLHQQFGPVVR.I                                               |
| <a href="#">6998</a> | 859.2126        | 1716.4107        | 1714.9828        | 1.4279         | 1        | 6         | 36             | 3         | R.LAASSIQLLASSLDK.L                                              |
| <a href="#">7075</a> | 863.3661        | 1724.7177        | 1723.0468        | 1.6709         | 2        | 1         | 1.1e+02        | 7         | R.SVPRGALRVVLQTTVK.K                                             |
| <a href="#">7127</a> | 866.7591        | 1731.5037        | 1730.8780        | 0.6257         | 1        | 9         | 17             | 3         | R.GSPAAKTWTWFPPAK.E                                              |
| <a href="#">7308</a> | <b>875.7836</b> | <b>1749.5527</b> | <b>1750.8533</b> | <b>-1.3006</b> | <b>2</b> | <b>5</b>  | <b>43</b>      | <b>1</b>  | <b>R.RDAGDHPVMPRLTDR.V</b>                                       |
| <a href="#">7318</a> | 876.3001        | 1750.5857        | 1750.8863        | -0.3006        | 2        | 0         | 1.4e+02        | 5         | R.RWDINTHVDPGSKAR.N                                              |
| <a href="#">7395</a> | <b>587.5502</b> | <b>1759.6287</b> | <b>1758.8748</b> | <b>0.7539</b>  | <b>1</b> | <b>3</b>  | <b>79</b>      | <b>7</b>  | <b>R.EPSGTLDKTSLSGNPTR.R</b>                                     |
| <a href="#">7456</a> | 589.2249        | 1764.6527        | 1761.9229        | 2.7298         | 1        | 2         | 95             | 9         | K.NQSI AALCMITVKAAR.L                                            |
| <a href="#">7473</a> | 589.6162        | 1765.8267        | 1766.8760        | -1.0493        | 0        | 5         | 48             | 7         | R.YVELGPSSILTDMAQK.A                                             |
| <a href="#">7556</a> | <b>887.2651</b> | <b>1772.5157</b> | <b>1772.0018</b> | <b>0.5139</b>  | <b>1</b> | <b>5</b>  | <b>51</b>      | <b>6</b>  | <b>K.QGRVFQLLPLEMTK.L</b> <a href="#">7567</a>                   |
| <a href="#">7608</a> | <b>889.7021</b> | <b>1777.3897</b> | <b>1777.8240</b> | <b>-0.4342</b> | <b>0</b> | <b>3</b>  | <b>85</b>      | <b>2</b>  | <b>R.QMLPDACFNAAAAGGIR.F</b>                                     |
| <a href="#">7628</a> | 890.3791        | 1778.7437        | 1776.8438        | 1.8999         | 1        | 2         | 96             | 4         | R.CGQTANSRYPYPRASGR.L                                            |
| <a href="#">7757</a> | 597.2762        | 1788.8067        | 1789.9363        | -1.1295        | 0        | 5         | 45             | 9         | K.LLGATELTAQYTPWR.E                                              |
| <a href="#">8100</a> | <b>608.6089</b> | <b>1822.8047</b> | <b>1820.9104</b> | <b>1.8943</b>  | <b>1</b> | <b>7</b>  | <b>28</b>      | <b>4</b>  | <b>R.APPAMSGRLPGHQFPSR.N</b> <a href="#">8102</a>                |
| <a href="#">8450</a> | 930.8016        | 1859.5887        | 1858.9286        | 0.6602         | 1        | 17        | 2.8            | 2         | R.ASSAEDGGTVQVRQLWR.L <a href="#">8451</a>                       |
| <a href="#">8464</a> | <b>621.6845</b> | <b>1862.0317</b> | <b>1862.9019</b> | <b>-0.8701</b> | <b>1</b> | <b>9</b>  | <b>19</b>      | <b>2</b>  | <b>K.IKAIESMPACTGDWLR.M</b>                                      |
| <a href="#">8519</a> | <b>624.2242</b> | <b>1869.6507</b> | <b>1869.9043</b> | <b>-0.2536</b> | <b>0</b> | <b>12</b> | <b>8.4</b>     | <b>1</b>  | <b>R.TRPSVAEAGMVTFYDR.J</b>                                      |
| <a href="#">8544</a> | 937.2666        | 1872.5187        | 1874.0230        | -1.5042        | 2        | 3         | 65             | 2         | R.KNQSIAALCMITVKAAR.L <a href="#">8590</a>                       |
| <a href="#">8635</a> | <b>629.2785</b> | <b>1884.8137</b> | <b>1882.9611</b> | <b>1.8526</b>  | <b>1</b> | <b>4</b>  | <b>57</b>      | <b>9</b>  | <b>R.EFAPRAMVDIHDLK.C</b>                                        |
| <a href="#">8970</a> | 958.7711        | 1915.5277        | 1914.9759        | 0.5518         | 2        | 8         | 21             | 2         | R.EPSGTLDKTSLSGNPTRR.S <a href="#">8945</a> <a href="#">8973</a> |
| <a href="#">9069</a> | <b>643.8122</b> | <b>1928.4147</b> | <b>1927.9350</b> | <b>0.4798</b>  | <b>1</b> | <b>0</b>  | <b>1.2e+02</b> | <b>7</b>  | <b>R.GWGSALMEFSTKVDSGLK.K</b>                                    |

|                       |           |           |           |         |   |     |         |    |                                                                                                                                                     |
|-----------------------|-----------|-----------|-----------|---------|---|-----|---------|----|-----------------------------------------------------------------------------------------------------------------------------------------------------|
| <a href="#">9228</a>  | 650.8225  | 1949.4457 | 1950.9087 | -1.4630 | 0 | 4   | 54      | 4  | R.TPFASYLGFFHMYQSR.Y                                                                                                                                |
| <a href="#">9260</a>  | 651.9639  | 1952.8697 | 1953.1272 | -0.2575 | 2 | 3   | 71      | 10 | K.RTTQLAGLVRNNAIWLK.L                                                                                                                               |
| <a href="#">9311</a>  | 981.1061  | 1960.1977 | 1958.9302 | 1.2675  | 0 | 91  | 1.1e-07 | 1  | R.FPESPTTESFWDLLYK.G <a href="#">9315</a>                                                                                                           |
| <a href="#">9428</a>  | 659.2965  | 1974.8677 | 1973.0227 | 1.8451  | 0 | (2) | 92      | 8  | K.LVLYSMISTLMGLSHHR.V                                                                                                                               |
| <a href="#">9466</a>  | 660.7132  | 1979.1177 | 1980.0251 | -0.9074 | 0 | 7   | 28      | 3  | R.AAIAFFIGAISGVSMNQGAR.R <a href="#">9456</a>                                                                                                       |
| <a href="#">9526</a>  | 663.8055  | 1988.3947 | 1985.9894 | 2.4053  | 2 | 5   | 39      | 4  | K.FTWMLRISGGDGFTSRR.G                                                                                                                               |
| <a href="#">9553</a>  | 664.6265  | 1990.8577 | 1990.8916 | -0.0338 | 1 | 4   | 50      | 7  | R.GGVQMSPDFTTGRGGHER.D                                                                                                                              |
| <a href="#">9570</a>  | 664.9255  | 1991.7547 | 1989.0176 | 2.7371  | 0 | 14  | 5.3     | 2  | K.LVLYSMISTLMGLSHHR.V <a href="#">9542</a> <a href="#">9544</a> <a href="#">9550</a> <a href="#">9562</a> <a href="#">9564</a> <a href="#">9569</a> |
| <a href="#">9663</a>  | 1002.4336 | 2002.8527 | 2001.9843 | 0.8684  | 2 | (0) | 1.3e+02 | 9  | K.FTWMLRISGGDGFTSRR.G                                                                                                                               |
| <a href="#">9704</a>  | 670.6539  | 2008.9397 | 2005.9759 | 2.9639  | 1 | 2   | 91      | 6  | R.HLFSPEPATRGPDPGWR.R                                                                                                                               |
| <a href="#">9763</a>  | 1008.7861 | 2015.5577 | 2016.1116 | -0.5539 | 1 | 2   | 75      | 6  | R.AVFSERGILGGITVQSNLR.D                                                                                                                             |
| <a href="#">9873</a>  | 676.7525  | 2027.2357 | 2028.0851 | -0.8494 | 0 | 3   | 62      | 10 | R.QILSGSQSLQQLSTVNTPK.Y                                                                                                                             |
| <a href="#">9906</a>  | 678.2299  | 2031.6677 | 2031.1081 | 0.5596  | 2 | 3   | 68      | 7  | K.NQSIAALCMITVKAARLR.Q                                                                                                                              |
| <a href="#">10023</a> | 681.5502  | 2041.6287 | 2040.0610 | 1.5677  | 1 | 2   | 74      | 7  | K.MVSFPKCSPIMIQFLVK.E                                                                                                                               |
| <a href="#">10415</a> | 696.2425  | 2085.7057 | 2087.1958 | -1.4901 | 2 | 9   | 18      | 5  | R.IILRKNQSIAALCMITVK.A                                                                                                                              |
| <a href="#">10554</a> | 702.6782  | 2105.0127 | 2102.0143 | 2.9984  | 0 | 5   | 45      | 4  | K.TLFMLPDGGGSAFSYASLPR.L                                                                                                                            |
| <a href="#">10561</a> | 1054.1901 | 2106.3657 | 2105.0398 | 1.3259  | 2 | 4   | 51      | 1  | R.RMPKVGIVWAADTVMDER.D <a href="#">10560</a>                                                                                                        |
| <a href="#">10700</a> | 710.0429  | 2127.1067 | 2126.1095 | 0.9972  | 1 | 7   | 23      | 1  | R.CTTLSAFLGRIFLHFTSR.R                                                                                                                              |
| <a href="#">10762</a> | 713.4415  | 2137.3027 | 2137.0415 | 0.2612  | 1 | 2   | 69      | 3  | R.RVSTFDLHDPMFYSPIGR.L                                                                                                                              |
| <a href="#">10808</a> | 715.0839  | 2142.2297 | 2140.0873 | 2.1425  | 1 | 0   | 1.2e+02 | 1  | R.LSSHSPRSVESQVTTSVPR.S                                                                                                                             |
| <a href="#">10923</a> | 719.5572  | 2155.6497 | 2155.0307 | 0.6190  | 2 | 5   | 39      | 1  | R.DQRIAQRDPKHGWDYDR.G                                                                                                                               |
| <a href="#">11062</a> | 725.8882  | 2174.6427 | 2176.1899 | -1.5471 | 2 | 2   | 79      | 7  | R.YAQRPALSCSVILTRGRK.C                                                                                                                              |
| <a href="#">11079</a> | 726.8822  | 2177.6247 | 2175.1284 | 2.4963  | 1 | 1   | 95      | 4  | R.SHQTEGNGPSIRLPVDVELK.A                                                                                                                            |
| <a href="#">11284</a> | 736.2125  | 2205.6157 | 2205.0605 | 0.5552  | 2 | 1   | 1e+02   | 2  | R.CSKQGSMSWQLPAVRAMPR.E                                                                                                                             |
| <a href="#">11292</a> | 1104.2556 | 2206.4967 | 2204.1154 | 2.3813  | 2 | 5   | 43      | 2  | R.RTGETRPACKSSPATMGIVTR.Q <a href="#">11280</a>                                                                                                     |
| <a href="#">11640</a> | 753.8102  | 2258.4087 | 2256.2213 | 2.1874  | 0 | 2   | 72      | 7  | R.VVEETTKPLGATLVVETDISR.K                                                                                                                           |
| <a href="#">11665</a> | 754.8075  | 2261.4007 | 2260.1667 | 1.2340  | 2 | 0   | 1.2e+02 | 9  | K.NVAEVQRAMTDNGIKCTLLK.L                                                                                                                            |
| <a href="#">12029</a> | 771.2805  | 2310.8197 | 2312.1994 | -1.3797 | 2 | 11  | 10      | 2  | R.SCKPCKFATGPLHRGASIVAR.L <a href="#">12028</a> <a href="#">12035</a> <a href="#">12062</a>                                                         |
| <a href="#">12099</a> | 773.8119  | 2318.4137 | 2316.0555 | 2.3582  | 0 | 1   | 97      | 6  | K.TYDMNVSVNAIGDGTAFPWK.G                                                                                                                            |
| <a href="#">12213</a> | 780.1909  | 2337.5507 | 2338.1259 | -0.5751 | 0 | 1   | 94      | 3  | K.LAPSTTPESMVMIDSFIAGMPK.A                                                                                                                          |
| <a href="#">12220</a> | 780.7332  | 2339.1777 | 2338.2605 | 0.9173  | 2 | 6   | 28      | 1  | K.VPESARPVALVDAERGKSVGSSK.C                                                                                                                         |
| <a href="#">12257</a> | 782.6335  | 2344.8787 | 2344.1555 | 0.7232  | 2 | 4   | 50      | 2  | R.MPKVGIVWAADTVMDERDAPK.M                                                                                                                           |
| <a href="#">12378</a> | 790.7629  | 2369.2667 | 2370.2179 | -0.9512 | 0 | 1   | 88      | 4  | R.VLINNFSAAGNTALIVEDAPER.H <a href="#">12414</a>                                                                                                    |
| <a href="#">12397</a> | 791.1742  | 2370.5007 | 2371.2035 | -0.7028 | 0 | 4   | 55      | 3  | R.HSPPFMLFTVISEPPTIWR.V <a href="#">12420</a>                                                                                                       |
| <a href="#">12660</a> | 803.8829  | 2408.6267 | 2408.1473 | 0.4794  | 0 | 2   | 72      | 5  | K.VLMMQHDITPPHCGIKPGSK.I                                                                                                                            |
| <a href="#">12857</a> | 812.5345  | 2434.5817 | 2432.1907 | 2.3911  | 2 | 4   | 56      | 6  | R.RLDVSYVPVPSIEYDQHCAKR.A                                                                                                                           |
| <a href="#">12900</a> | 814.4739  | 2440.3997 | 2438.2138 | 2.1859  | 2 | 4   | 51      | 6  | R.YQGTFIARRVSEAAHVHGM.R.I                                                                                                                           |
| <a href="#">12981</a> | 818.7969  | 2453.3687 | 2454.3053 | -0.9366 | 2 | 3   | 61      | 2  | K.GPQLLR'TLTMWPPKAAAT'R.S                                                                                                                           |
| <a href="#">13085</a> | 823.4275  | 2467.2607 | 2466.2939 | 0.9668  | 2 | 2   | 79      | 10 | K.VARLSSHSPRSVESQVTTSVPR.S                                                                                                                          |
| <a href="#">13295</a> | 832.2429  | 2493.7067 | 2491.1777 | 2.5291  | 0 | 5   | 35      | 1  | K.APHMPLTWSMAFAWATSAAGLR.R                                                                                                                          |
| <a href="#">13391</a> | 836.4682  | 2506.3827 | 2506.2427 | 0.1400  | 1 | 1   | 90      | 1  | R.YELGHSFHFSLKSTPSRPTMGK.R                                                                                                                          |

|                       |           |           |           |         |   |     |       |    |                                                                         |
|-----------------------|-----------|-----------|-----------|---------|---|-----|-------|----|-------------------------------------------------------------------------|
| <a href="#">13500</a> | 841.3169  | 2520.9287 | 2522.3519 | -1.4232 | 1 | 3   | 53    | 10 | R.LWGPFLQLAHRPRHHQSLSSR.K                                               |
| <a href="#">13664</a> | 847.8485  | 2540.5237 | 2540.0188 | 0.5049  | 0 | 4   | 47    | 1  | R.DPENMNCTHGAMIESFCNEIR.R <a href="#">13667</a> <a href="#">13670</a>   |
| <a href="#">13699</a> | 850.6325  | 2548.8757 | 2549.2692 | -0.3934 | 1 | 3   | 59    | 9  | K.LAPSTTPESMVMIDSFIAGMPKAR.R                                            |
| <a href="#">13850</a> | 858.2382  | 2571.6927 | 2571.1225 | 0.5702  | 1 | (1) | 93    | 3  | K.EAPQMDPAQRMALMSTYEAMER.A                                              |
| <a href="#">13859</a> | 858.6312  | 2572.8717 | 2572.2236 | 0.6481  | 2 | 2   | 74    | 2  | R.WMDYCVLKRQGSTSISKPECK.R <a href="#">13863</a> <a href="#">13873</a>   |
| <a href="#">13991</a> | 869.5172  | 2605.5297 | 2603.1124 | 2.4173  | 1 | 7   | 21    | 1  | K.EAPQMDPAQRMALMSTYEAMER.A                                              |
| <a href="#">14114</a> | 876.4499  | 2626.3277 | 2625.4027 | 0.9250  | 2 | 2   | 66    | 6  | R.KLLGATELTAAQYTPWRETHALR.L                                             |
| <a href="#">14141</a> | 878.8705  | 2633.5897 | 2631.2838 | 2.3059  | 1 | 2   | 75    | 1  | K.APHMPLTWSSMAFAWATSAAGLRR.N                                            |
| <a href="#">14160</a> | 880.3369  | 2637.9887 | 2636.3823 | 1.6064  | 0 | 1   | 1e+02 | 5  | K.GWPTTLGIQRPTNSHGFTSPTLLR.S                                            |
| <a href="#">14319</a> | 888.0205  | 2661.0397 | 2660.3592 | 0.6805  | 2 | 0   | 1e+02 | 8  | R.QVKVWEGSLEDVSLSECIRGTR.A                                              |
| <a href="#">14489</a> | 896.1462  | 2685.4167 | 2683.2695 | 2.1472  | 0 | 1   | 87    | 8  | R.TPNLLAGYVEALGLSMYDPMPEMR.I                                            |
| <a href="#">14557</a> | 901.1605  | 2700.4597 | 2700.3582 | 0.1016  | 0 | 4   | 42    | 1  | R.IPDIGLDCDSIGTIGLDLDFNHFLR.G                                           |
| <a href="#">14698</a> | 909.2912  | 2724.8517 | 2722.5091 | 2.3426  | 2 | 1   | 80    | 3  | K.MTLGDKISTLPTLAPNKAIWPSLQK.I                                           |
| <a href="#">14808</a> | 919.7319  | 2756.1737 | 2755.3534 | 0.8203  | 1 | 1   | 87    | 8  | K.LPAMHNRSTSLSEFEPCTGGPGTGLR.S                                          |
| <a href="#">14986</a> | 935.7805  | 2804.3197 | 2803.2827 | 1.0371  | 1 | 0   | 1e+02 | 10 | R.MALMSTYEAMERAGLVPDTPSTQR.D                                            |
| <a href="#">15063</a> | 944.1089  | 2829.3047 | 2829.4353 | -0.1306 | 2 | 1   | 92    | 7  | R.MHMNSILDHFHPPSVVRCLLRGR.R <a href="#">15044</a> <a href="#">15060</a> |
| <a href="#">15261</a> | 968.7559  | 2903.2457 | 2900.6191 | 2.6266  | 1 | 2   | 63    | 8  | R.QLVSQSSLVLEAVMANLVLLLTMTTR.G                                          |
| <a href="#">15535</a> | 1014.2785 | 3039.8137 | 3038.4682 | 1.3456  | 1 | 0   | 97    | 3  | R.AQSSSPWPHWQPPRPSASPRAPPAMSGR.L                                        |
| <a href="#">15663</a> | 1027.5592 | 3079.6557 | 3078.6470 | 1.0087  | 2 | 5   | 33    | 1  | R.RCLISAVYLRGAPLSMSAAVVVISADGFR.K                                       |
| <a href="#">15709</a> | 1033.2145 | 3096.6217 | 3094.6420 | 1.9798  | 2 | (4) | 38    | 1  | R.RCLISAVYLRGAPLSMSAAVVVISADGFR.K                                       |
| <a href="#">15830</a> | 1056.3179 | 3165.9317 | 3164.5713 | 1.3604  | 1 | 2   | 59    | 7  | R.NWPVPVTSLETRPSVAEAAAGMVFYDR.J                                         |
| <a href="#">15967</a> | 1082.8969 | 3245.6687 | 3247.6329 | -1.9642 | 1 | 2   | 64    | 10 | K.GSIDYIVCGMSALEQNQNIADVDPILRLSR.G                                      |
| <a href="#">15989</a> | 1086.8752 | 3257.6037 | 3259.5399 | -1.9362 | 2 | 2   | 64    | 4  | K.VYEVEFRVNPFSMGGCLPSIGGCPIMRR.J                                        |
| <a href="#">16063</a> | 1097.0789 | 3288.2147 | 3289.8043 | -1.5896 | 2 | 1   | 72    | 2  | R.SSVPLPVGMLHPVRSFLSCLRSIPPLSSK.S                                       |
| <a href="#">16085</a> | 1099.1872 | 3294.5397 | 3292.6307 | 1.9090  | 1 | 1   | 79    | 4  | R.GWMSAIVTYIPAAAHARAVANPMPDAPPVMR.A                                     |
| <a href="#">16236</a> | 1690.5311 | 3379.0477 | 3380.7481 | -1.7004 | 1 | 1   | 85    | 3  | K.MVGLTAAMMPTTGTAMAVTWNQFRPIVKIK.F                                      |
| <a href="#">16386</a> | 1157.8399 | 3470.4977 | 3470.6210 | -0.1233 | 2 | 1   | 67    | 9  | K.GMHFMIQKRTEFGPDGWDTIMPGASFDIRV.A                                      |

244. [gi|220698533|gb|EED54873.1|](#) Mass: 33288 Score: 108 Queries matched: 15 emPAI: 0.33

mitochondrial 2-oxodicarboxylate carrier protein, putative [Aspergillus flavus NRRL3357]

| Query                 | Observed  | Mr(expt)  | Mr(calc)  | Delta   | Miss | Score | Expect  | Rank | Peptide                                        |
|-----------------------|-----------|-----------|-----------|---------|------|-------|---------|------|------------------------------------------------|
| <a href="#">1363</a>  | 551.4171  | 1100.8197 | 1100.6302 | 0.1896  | 2    | 6     | 51      | 8    | R.KIVKNEGASR.L                                 |
| <a href="#">2050</a>  | 614.8086  | 1227.6027 | 1225.6740 | 1.9287  | 0    | 8     | 23      | 8    | R.GISAPILMEAPK.R                               |
| <a href="#">4637</a>  | 761.9776  | 1521.9407 | 1521.7439 | 0.1969  | 0    | 45    | 0.0048  | 1    | K.YNWAAPAVGTVMK.E <a href="#">4645</a>         |
| <a href="#">4782</a>  | 513.3729  | 1537.0967 | 1537.7388 | -0.6420 | 0    | (2)   | 94      | 10   | K.YNWAAPAVGTVMK.E                              |
| <a href="#">7476</a>  | 884.3411  | 1766.6677 | 1765.7440 | 0.9237  | 0    | 66    | 3.9e-05 | 1    | R.AAGEEFYTG MFDCLR.K                           |
| <a href="#">7678</a>  | 595.2572  | 1782.7497 | 1781.7389 | 1.0108  | 0    | (12)  | 9.9     | 1    | R.AAGEEFYTG MFDCLR.K                           |
| <a href="#">8016</a>  | 908.2136  | 1814.4127 | 1814.0236 | 0.3891  | 2    | 3     | 69      | 6    | R.LYRGISAPILMEAPK.R <a href="#">8025</a>       |
| <a href="#">11659</a> | 1131.4671 | 2260.9197 | 2259.1899 | 1.7298  | 0    | 46    | 0.0031  | 1    | K.IVQTEGPLALYNGLESTLWR.H <a href="#">11668</a> |
| <a href="#">15226</a> | 961.3582  | 2881.0527 | 2882.5663 | -1.5136 | 2    | 4     | 40      | 1    | K.VLRLGPGGGILLVVFVTGVMDFFRTRM.G                |

[15427](#) 996.5949 2986.7627 2984.5601 2.2026 1 1 71 4 K.TQQTRNDLIAGTIGGTAGTILNTPMDVVK.S  
[15889](#) 1066.9435 3197.8087 3197.6008 0.2079 2 2 63 9 K.VAGQTPKYNWAWPAVGTVMKEEGFGALYK.G [15887](#)

245. [gi|220693029|gb|EED49375.1|](#) Mass: 18072 Score: 107 Queries matched: 11 emPAI: 0.41

peptidyl-prolyl cis-trans isomerase/cyclophilin, putative [Aspergillus flavus NRRL3357]

| Query                | Observed | Mr(expt)  | Mr(calc)  | Delta   | Miss | Score | Expect  | Rank | Peptide                                                                                                                                                               |
|----------------------|----------|-----------|-----------|---------|------|-------|---------|------|-----------------------------------------------------------------------------------------------------------------------------------------------------------------------|
| <a href="#">5580</a> | 805.7461 | 1609.4777 | 1607.8130 | 1.6647  | 0    | 71    | 1.2e-05 | 1    | R.VIPQFMLQGGDFTR.G <a href="#">5550</a> <a href="#">5593</a>                                                                                                          |
| <a href="#">5779</a> | 812.9011 | 1623.7877 | 1623.8079 | -0.0202 | 0    | (39)  | 0.018   | 1    | R.VIPQFMLQGGDFTR.G <a href="#">5751</a> <a href="#">5753</a> <a href="#">5770</a> <a href="#">5772</a> <a href="#">5783</a> <a href="#">5796</a> <a href="#">5800</a> |

246. [gi|220693751|gb|EED50096.1|](#) Mass: 14616 Score: 107 Queries matched: 12 emPAI: 0.87

60S ribosomal protein L35 [Aspergillus flavus NRRL3357]

| Query                | Observed | Mr(expt)  | Mr(calc)  | Delta  | Miss | Score | Expect  | Rank | Peptide                                                                                               |
|----------------------|----------|-----------|-----------|--------|------|-------|---------|------|-------------------------------------------------------------------------------------------------------|
| <a href="#">96</a>   | 715.5640 | 714.5567  | 714.4249  | 0.1318 | 2    | 10    | 20      | 2    | R.DLRRR.L <a href="#">94</a>                                                                          |
| <a href="#">600</a>  | 464.0471 | 926.0797  | 925.4770  | 0.6027 | 0    | 29    | 0.17    | 1    | R.EIHFPQR.K <a href="#">601</a>                                                                       |
| <a href="#">1441</a> | 558.1746 | 1114.3347 | 1113.6546 | 0.6801 | 0    | 27    | 0.33    | 1    | K.YLPLDLRPK.L <a href="#">1432</a> <a href="#">1442</a>                                               |
| <a href="#">5640</a> | 807.7181 | 1613.4217 | 1612.8784 | 0.5433 | 1    | 71    | 1.2e-05 | 1    | K.QLEELKQELSQLR.V <a href="#">5641</a> <a href="#">5648</a> <a href="#">5650</a> <a href="#">5652</a> |

247. [gi|220699141|gb|EED55480.1|](#) Mass: 67948 Score: 107 Queries matched: 26 emPAI: 0.10

intermembrane space AAA protease IAP-1 [Aspergillus flavus NRRL3357]

| Query                 | Observed  | Mr(expt)  | Mr(calc)  | Delta   | Miss | Score | Expect  | Rank | Peptide                                                                  |
|-----------------------|-----------|-----------|-----------|---------|------|-------|---------|------|--------------------------------------------------------------------------|
| <a href="#">79</a>    | 694.5290  | 693.5217  | 694.3650  | -0.8433 | 0    | 16    | 3.8     | 8    | R.FSSLGGK.L                                                              |
| <a href="#">85</a>    | 704.1170  | 703.1097  | 702.3912  | 0.7186  | 1    | 15    | 7.6     | 6    | K.GEKLEK.L                                                               |
| <a href="#">436</a>   | 438.9421  | 875.8697  | 875.4647  | 0.4050  | 1    | 20    | 1.9     | 5    | R.GRMDILR.H                                                              |
| <a href="#">536</a>   | 456.0091  | 910.0037  | 909.4048  | 0.5989  | 0    | 24    | 0.58    | 2    | K.IMMGAEAR.S <a href="#">532</a> <a href="#">534</a> <a href="#">537</a> |
| <a href="#">1077</a>  | 524.4236  | 1046.8327 | 1044.5927 | 2.2400  | 1    | 16    | 4.2     | 1    | R.ATNILTEKR.H <a href="#">1073</a>                                       |
| <a href="#">1160</a>  | 532.6081  | 1063.2017 | 1064.5250 | -1.3233 | 1    | 9     | 23      | 6    | R.NERDAAYVK.Q                                                            |
| <a href="#">1479</a>  | 561.3846  | 1120.7547 | 1120.5369 | 0.2179  | 1    | 11    | 14      | 6    | K.DKIMMGAEAR.S                                                           |
| <a href="#">1611</a>  | 570.5791  | 1139.1437 | 1136.5318 | 2.6119  | 1    | (8)   | 25      | 8    | K.DKIMMGAEAR.S                                                           |
| <a href="#">1672</a>  | 577.2411  | 1152.4677 | 1152.5267 | -0.0590 | 1    | (4)   | 53      | 9    | K.DKIMMGAEAR.S                                                           |
| <a href="#">1685</a>  | 1156.1390 | 1155.1317 | 1152.5379 | 2.5938  | 1    | 0     | 1.5e+02 | 7    | K.IMMGAEARSR.V                                                           |
| <a href="#">1883</a>  | 599.5496  | 1197.0847 | 1195.5954 | 1.4893  | 1    | 10    | 14      | 6    | R.MDILRHHMK.D <a href="#">1892</a>                                       |
| <a href="#">3286</a>  | 456.4409  | 1366.3007 | 1363.6700 | 2.6307  | 2    | 12    | 9.8     | 2    | K.DKIMMGAEARSR.V                                                         |
| <a href="#">3584</a>  | 699.9946  | 1397.9747 | 1395.6598 | 2.3149  | 2    | (3)   | 84      | 5    | K.DKIMMGAEARSR.V                                                         |
| <a href="#">3789</a>  | 713.7521  | 1425.4897 | 1424.7129 | 0.7768  | 2    | 3     | 83      | 3    | R.GRMDILRHHMK.D                                                          |
| <a href="#">3952</a>  | 722.2236  | 1442.4327 | 1440.8300 | 1.6028  | 2    | 2     | 91      | 9    | K.LEKLESRASAPLK.L                                                        |
| <a href="#">6196</a>  | 829.2936  | 1656.5727 | 1655.9134 | 0.6593  | 0    | 48    | 0.0023  | 1    | K.APAIIFIDELDAIGAK.R <a href="#">6204</a>                                |
| <a href="#">8718</a>  | 630.6962  | 1889.0667 | 1889.0040 | 0.0627  | 2    | 2     | 94      | 5    | R.LVEEARMRATNILTEK.R                                                     |
| <a href="#">12204</a> | 1168.9056 | 2335.7967 | 2334.1604 | 1.6363  | 0    | 55    | 0.00041 | 1    | R.GTPGFSGADLENLVNQAIFASR.N <a href="#">12197</a>                         |
| <a href="#">15539</a> | 1014.5835 | 3040.7287 | 3038.4484 | 2.2803  | 1    | 3     | 49      | 4    | R.AVAGEAGVPPFYMSGSEFDEVYVGVGAKR.V                                        |



248. [gi|220701789|gb|EED58127.1](#) Mass: 37153 Score: 105 Queries matched: 6 emPAI: 0.19  
eukaryotic translation initiation factor 3 subunit EifCf, putative [Aspergillus flavus NRRL3357]

| Query                 | Observed | Mr(expt)  | Mr(calc)  | Delta   | Miss | Score | Expect  | Rank | Peptide                                |
|-----------------------|----------|-----------|-----------|---------|------|-------|---------|------|----------------------------------------|
| <a href="#">854</a>   | 497.1876 | 992.3607  | 993.4549  | -1.0942 | 0    | 23    | 0.83    | 2    | R.TQMELSNR.L <a href="#">860</a>       |
| <a href="#">4133</a>  | 732.2791 | 1462.5437 | 1461.7463 | 0.7974  | 0    | 66    | 4.1e-05 | 1    | R.AANIFTDIEALER.A <a href="#">4131</a> |
| <a href="#">5721</a>  | 811.1211 | 1620.2277 | 1618.8355 | 1.3922  | 0    | 30    | 0.14    | 1    | R.AADSAAFIPVPYR.Y                      |
| <a href="#">13573</a> | 843.4089 | 2527.2047 | 2528.1377 | -0.9330 | 0    | 3     |         | 67   | 4 R.TTFAVGHTETTDQVEVDMEYQK.Q           |

249. [gi|220699805|gb|EED56144.1](#) Mass: 100280 Score: 105 Queries matched: 12 emPAI: 0.07  
protein transport protein Sec24, putative [Aspergillus flavus NRRL3357]

| Query                 | Observed  | Mr(expt)  | Mr(calc)  | Delta   | Miss | Score | Expect  | Rank  | Peptide                                      |
|-----------------------|-----------|-----------|-----------|---------|------|-------|---------|-------|----------------------------------------------|
| <a href="#">121</a>   | 733.1260  | 732.1187  | 731.4541  | 0.6646  | 1    | 10    |         | 24    | 6 K.KVLGTSK.E                                |
| <a href="#">1410</a>  | 555.1711  | 1108.3277 | 1107.5448 | 0.7829  | 0    | 7     |         | 29    | 5 R.ENIETFLDK.L                              |
| <a href="#">3295</a>  | 684.6351  | 1367.2557 | 1366.6340 | 0.6218  | 0    | 52    | 0.00095 | 1     | R.SSDLCAFPAPFR.D <a href="#">3294</a>        |
| <a href="#">3595</a>  | 700.5941  | 1399.1737 | 1398.6027 | 0.5710  | 0    | 4     |         | 62    | 8 R.MSTFYGNFFNR.S                            |
| <a href="#">7077</a>  | 863.4196  | 1724.8247 | 1724.9349 | -0.1102 | 0    | 70    | 1.5e-05 | 1     | R.DAVPQLIVDFGLPDK.S <a href="#">7080</a>     |
| <a href="#">9027</a>  | 641.7172  | 1922.1297 | 1921.0098 | 1.1199  | 0    | 3     |         | 67    | 1 R.LGFIAVDSSLHYFSIPR.D <a href="#">9032</a> |
| <a href="#">11857</a> | 763.5942  | 2287.7607 | 2284.9987 | 2.7620  | 0    | 5     |         | 43    | 2 K.LQEMFQNTQNGCAMGSALR.A                    |
| <a href="#">12200</a> | 779.5872  | 2335.7397 | 2334.2597 | 1.4801  | 2    | 1     |         | 99    | 7 R.RTRLGFIAVDSSLHYFSIPR.D                   |
| <a href="#">12383</a> | 1185.7411 | 2369.4677 | 2367.1965 | 2.2713  | 2    | 1     |         | 1e+02 | 2 K.QNLPDLNDNMQRVRAVIEK.S                    |

250. [gi|220696548|gb|EED52890.1](#) Mass: 34216 Score: 105 Queries matched: 20 emPAI: 0.59  
prohibitin, putative [Aspergillus flavus NRRL3357]

| Query                 | Observed | Mr(expt)  | Mr(calc)  | Delta   | Miss | Score | Expect  | Rank | Peptide                                                     |
|-----------------------|----------|-----------|-----------|---------|------|-------|---------|------|-------------------------------------------------------------|
| <a href="#">949</a>   | 509.1311 | 1016.2477 | 1015.5549 | 0.6928  | 0    | 20    | 1.9     | 1    | R.SAELIGDAIK.K                                              |
| <a href="#">1224</a>  | 537.8101 | 1073.6057 | 1073.5869 | 0.0188  | 0    | 47    | 0.0038  | 1    | R.VDALPQIYR.T <a href="#">1229</a>                          |
| <a href="#">1487</a>  | 561.6826 | 1121.3507 | 1118.5978 | 2.7529  | 2    | 9     |         | 22   | 7 R.MVRDSLARR.A <a href="#">1484</a>                        |
| <a href="#">1918</a>  | 603.3541 | 1204.6937 | 1203.5884 | 1.1053  | 0    | 51    | 0.0013  | 1    | K.EIYSEGTHIR.I                                              |
| <a href="#">1944</a>  | 606.2431 | 1210.4717 | 1209.7333 | 0.7385  | 0    | 48    | 0.0023  | 1    | R.VLPSIVNEVLK.S <a href="#">1957</a>                        |
| <a href="#">2256</a>  | 629.2806 | 1256.5467 | 1255.5735 | 0.9733  | 0    | 27    | 0.3     | 1    | R.GGFGFGGFPSSGGR.G <a href="#">2260</a>                     |
| <a href="#">2656</a>  | 650.5111 | 1299.0077 | 1297.6990 | 1.3087  | 0    | 13    | 7.8     | 1    | R.QIAQILQENGK.N <a href="#">2655</a>                        |
| <a href="#">3211</a>  | 454.2475 | 1359.7207 | 1358.7769 | 0.9438  | 2    | 8     |         | 29   | 7 R.SAELIGDAIKKSK.S                                         |
| <a href="#">4746</a>  | 767.5471 | 1533.0797 | 1531.7889 | 1.2908  | 2    | 2     | 1.1e+02 | 6    | R.ENVARMVRDSLAR.R                                           |
| <a href="#">5486</a>  | 801.9776 | 1601.9407 | 1599.8661 | 2.0747  | 0    | 28    | 0.27    | 1    | R.IPWIETPVIYDVR.A <a href="#">5460</a> <a href="#">5499</a> |
| <a href="#">7888</a>  | 901.8696 | 1801.7247 | 1800.9482 | 0.7765  | 1    | 1     | 1.2e+02 | 2    | K.QVAQQEAQRAAFLVDK.A                                        |
| <a href="#">10151</a> | 686.0202 | 2055.0387 | 2052.1520 | 2.8867  | 1    | 1     |         | 98   | 4 R.IPWIETPVIYDVRAPR.N                                      |
| <a href="#">13485</a> | 840.7919 | 2519.3537 | 2520.3099 | -0.9561 | 2    | 2     |         | 70   | 10 R.LQVILQNRGSRGGFGGFPSSGGR.G                              |

251. [gi|220689446|gb|EED45797.1|](#) Mass: 24312 Score: 104 Queries matched: 11 emPAI: 0.29

nitroreductase family protein, putative [Aspergillus flavus NRRL3357]

| Query                 | Observed         | Mr(expt)         | Mr(calc)         | Delta         | Miss     | Score     | Expect         | Rank     | Peptide                                                           |
|-----------------------|------------------|------------------|------------------|---------------|----------|-----------|----------------|----------|-------------------------------------------------------------------|
| <a href="#">870</a>   | 499.1226         | 996.2307         | 995.4746         | 0.7561        | 0        | 7         | 26             | 7        | -.MGSAQVEFK.N <a href="#">869</a>                                 |
| <a href="#">1904</a>  | 601.4066         | 1200.7987        | 1199.5935        | 1.2053        | 0        | 9         | 20             | 6        | K.EAFENHTKPK.L                                                    |
| <a href="#">2681</a>  | <b>651.9546</b>  | <b>1301.8947</b> | <b>1301.7191</b> | <b>0.1757</b> | <b>0</b> | <b>24</b> | <b>0.69</b>    | <b>1</b> | <b>K.NASTNTLLELVK.A <a href="#">2676</a> <a href="#">2688</a></b> |
| <a href="#">6526</a>  | 561.3089         | 1680.9047        | 1680.8988        | 0.0060        | 2        | 2         | 83             | 9        | K.EFAPLENRFKVFVK.S                                                |
| <a href="#">12438</a> | 792.6672         | 2374.9797        | 2375.2808        | -0.3011       | 2        | 0         | 1.1e+02        | 4        | M.GSAQVEFKNASTNTLLELVKAR.R                                        |
| <a href="#">13543</a> | 841.9519         | 2522.8337        | 2522.3162        | 0.5175        | 2        | 3         | 55             | 7        | -.MGSAQVEFKNASTNTLLELVKAR.R                                       |
| <a href="#">16123</a> | <b>1106.2262</b> | <b>3315.6567</b> | <b>3314.6266</b> | <b>1.0301</b> | <b>0</b> | <b>74</b> | <b>3.5e-06</b> | <b>1</b> | <b>K.AESPISDDAIQSIIVETSVLHVPSSFNTQTSR.V <a href="#">16127</a></b> |

252. [gi|220696653|gb|EED52995.1|](#) Mass: 33376 Score: 103 Queries matched: 19 emPAI: 0.33

60S ribosomal protein L19 [Aspergillus flavus NRRL3357]

| Query                 | Observed        | Mr(expt)         | Mr(calc)         | Delta         | Miss     | Score     | Expect         | Rank     | Peptide                                                                          |
|-----------------------|-----------------|------------------|------------------|---------------|----------|-----------|----------------|----------|----------------------------------------------------------------------------------|
| <a href="#">810</a>   | <b>493.3681</b> | <b>984.7217</b>  | <b>984.5968</b>  | <b>0.1250</b> | <b>0</b> | <b>52</b> | <b>0.001</b>   | <b>1</b> | <b>K.LVSDGLIIR.K <a href="#">808</a> <a href="#">809</a> <a href="#">812</a></b> |
| <a href="#">1244</a>  | 539.9841        | 1077.9537        | 1077.5376        | 0.4161        | 1        | 23        | 0.95           | 1        | R.VLKEEMDAK.R                                                                    |
| <a href="#">1433</a>  | <b>557.5846</b> | <b>1113.1547</b> | <b>1112.6917</b> | <b>0.4630</b> | <b>1</b> | <b>55</b> | <b>0.00048</b> | <b>1</b> | <b>R.KLVSDGLIIR.K <a href="#">1436</a></b>                                       |
| <a href="#">1656</a>  | <b>575.2446</b> | <b>1148.4747</b> | <b>1146.5678</b> | <b>1.9069</b> | <b>0</b> | <b>18</b> | <b>3.1</b>     | <b>1</b> | <b>R.MPSQVLWMR.R <a href="#">1658</a></b>                                        |
| <a href="#">1801</a>  | 590.4196        | 1178.8247        | 1178.5576        | 0.2671        | 0        | (10)      | 17             | 4        | R.MPSQVLWMR.R                                                                    |
| <a href="#">2110</a>  | 619.6246        | 1237.2347        | 1237.6489        | -0.4141       | 1        | 5         | 46             | 9        | R.YADIKMVNLR.T                                                                   |
| <a href="#">2821</a>  | 660.1596        | 1318.3047        | 1318.6638        | -0.3591       | 1        | (1)       | 1.4e+02        | 9        | R.MPSQVLWMRR.M                                                                   |
| <a href="#">2970</a>  | 668.2846        | 1334.5547        | 1334.6587        | -0.1040       | 1        | 13        | 7.6            | 3        | R.MPSQVLWMRR.M                                                                   |
| <a href="#">3932</a>  | <b>480.9892</b> | <b>1439.9457</b> | <b>1438.7357</b> | <b>1.2100</b> | <b>0</b> | <b>44</b> | <b>0.006</b>   | <b>1</b> | <b>K.HLYHELYHLSK.G</b>                                                           |
| <a href="#">5404</a>  | 798.7051        | 1595.3957        | 1594.8501        | 0.5456        | 2        | 6         | 40             | 7        | R.YADIKMVNLR <sup>T</sup> QK.R <a href="#">5397</a>                              |
| <a href="#">6479</a>  | <b>560.1749</b> | <b>1677.5027</b> | <b>1674.8446</b> | <b>2.6581</b> | <b>2</b> | <b>4</b>  | <b>58</b>      | <b>8</b> | <b>K.EARMPSQVLWMRR.M</b>                                                         |
| <a href="#">9017</a>  | 641.1762        | 1920.5067        | 1921.0931        | -0.5864       | 1        | 3         | 71             | 7        | K.LVSDGLIIRKPV <sup>T</sup> MHSR.V                                               |
| <a href="#">13111</a> | <b>824.2329</b> | <b>2469.6767</b> | <b>2469.3393</b> | <b>0.3374</b> | <b>2</b> | <b>3</b>  | <b>60</b>      | <b>3</b> | <b>K.VSTQPAYLQTPHFWILTRRR.V</b>                                                  |

253. [gi|220693956|gb|EED50301.1|](#) Mass: 73401 Score: 102 Queries matched: 23 emPAI: 0.04

AIF-like mitochondrial oxidoreductase (Nfr1), putative [Aspergillus flavus NRRL3357]

| Query                | Observed        | Mr(expt)         | Mr(calc)         | Delta          | Miss     | Score     | Expect         | Rank     | Peptide                                   |
|----------------------|-----------------|------------------|------------------|----------------|----------|-----------|----------------|----------|-------------------------------------------|
| <a href="#">293</a>  | <b>415.4061</b> | <b>828.7977</b>  | <b>829.4545</b>  | <b>-0.6568</b> | <b>0</b> | <b>17</b> | <b>3.6</b>     | <b>1</b> | <b>K.ALISDPSK.I</b>                       |
| <a href="#">552</a>  | <b>914.0720</b> | <b>913.0647</b>  | <b>913.5233</b>  | <b>-0.4585</b> | <b>0</b> | <b>7</b>  | <b>36</b>      | <b>1</b> | <b>R.IIQNLEK.A <a href="#">558</a></b>    |
| <a href="#">1605</a> | 570.1531        | 1138.2917        | 1138.6029        | -0.3112        | 1        | 7         | 31             | 9        | -.MHVPLSRGAR.N <a href="#">1601</a>       |
| <a href="#">1987</a> | 1217.3360       | 1216.3287        | 1216.5936        | -0.2648        | 0        | 4         | 70             | 4        | K.DNDVTIVGQEK.A                           |
| <a href="#">4851</a> | <b>772.5806</b> | <b>1543.1467</b> | <b>1543.9086</b> | <b>-0.7619</b> | <b>2</b> | <b>0</b>  | <b>1.5e+02</b> | <b>6</b> | <b>R.IIQNLEKAGVKFK.L</b>                  |
| <a href="#">4862</a> | 773.0296        | 1544.0447        | 1543.8246        | 0.2201         | 2        | 1         | 1.3e+02        | 10       | R.TVATKSGKTYPYTK.L                        |
| <a href="#">7111</a> | <b>577.2412</b> | <b>1728.7017</b> | <b>1729.9727</b> | <b>-1.2710</b> | <b>0</b> | <b>2</b>  | <b>82</b>      | <b>6</b> | <b>K.LVIVGGSGT<sup>F</sup>GVVEAIR.E</b>   |
| <a href="#">7962</a> | 905.7866        | 1809.5587        | 1808.7986        | 0.7602         | 1        | 9         | 18             | 3        | K.EMDKVESEVEGIEDGK.V <a href="#">7963</a> |

|                       |                 |                  |                  |               |          |           |                |          |                                                                        |
|-----------------------|-----------------|------------------|------------------|---------------|----------|-----------|----------------|----------|------------------------------------------------------------------------|
| <a href="#">8084</a>  | 911.1716        | 1820.3287        | 1817.9134        | 2.4153        | 0        | 2         | 83             | 6        | K.VLVVNYEGQFHAMSPK.C                                                   |
| <a href="#">8208</a>  | 918.8616        | 1835.7087        | 1833.9039        | 1.8048        | 0        | (1)       | 1.1e+02        | 7        | K.GDTVAVATMGMDPIMVK.C                                                  |
| <a href="#">8476</a>  | 622.3155        | 1863.9247        | 1865.8937        | -1.9690       | 0        | 2         | 95             | 7        | K.GDTVAVATMGMDPIMVK.C                                                  |
| <a href="#">9001</a>  | <b>960.2111</b> | <b>1918.4077</b> | <b>1917.0360</b> | <b>1.3717</b> | <b>0</b> | <b>61</b> | <b>0.00011</b> | <b>1</b> | <b>R.TLPVEGFNDLGNIFLLR.F</b> <a href="#">8996</a> <a href="#">9008</a> |
| <a href="#">9054</a>  | 643.0349        | 1926.0827        | 1923.9989        | 2.0838        | 1        | 4         | 56             | 5        | K.CTHYGAPLKLGVVAPEGR.I                                                 |
| <a href="#">9375</a>  | 985.0011        | 1967.9877        | 1968.0237        | -0.0360       | 2        | 10        | 15             | 2        | K.MAQEYKLDISSLADIK.E                                                   |
| <a href="#">9493</a>  | 992.2211        | 1982.4277        | 1981.7499        | 0.6778        | 0        | 3         | 76             | 5        | R.NSTTSCSCCAHPTSPR.R                                                   |
| <a href="#">11726</a> | 759.2262        | 2274.6567        | 2276.2562        | -1.5995       | 2        | 4         | 46             | 2        | K.NKKIVVVGSSFIGMEVGNALAK.D                                             |
| <a href="#">13574</a> | 843.4129        | 2527.2167        | 2526.3363        | 0.8804        | 2        | 1         | 89             | 3        | K.NMPSKQIESGVDVLKVGLPEGVK.I                                            |
| <a href="#">14168</a> | 880.7905        | 2639.3497        | 2640.3177        | -0.9680       | 2        | 0         | 1.1e+02        | 5        | K.DNDVTIVGQEKAPMERVLGEEVGR.I                                           |

254. [gi|220699065|gb|EED55404.1|](#) Mass: 24557 Score: 101 Queries matched: 8 emPAI: 0.14

50S ribosomal protein L24 [Aspergillus flavus NRRL3357]

| Query                 | Observed        | Mr(expt)         | Mr(calc)         | Delta         | Miss     | Score     | Expect       | Rank     | Peptide                                          |
|-----------------------|-----------------|------------------|------------------|---------------|----------|-----------|--------------|----------|--------------------------------------------------|
| <a href="#">1918</a>  | 603.3541        | 1204.6937        | 1203.6400        | 1.0537        | 0        | 21        | 1.4          | 3        | K.ELGVFGWQLR.W                                   |
| <a href="#">2017</a>  | 1222.6630       | 1221.6557        | 1221.6241        | 0.0316        | 0        | 0         | 1.5e+02      | 9        | K.EITKPTYNEK.Q                                   |
| <a href="#">4467</a>  | 501.8579        | 1502.5517        | 1503.7868        | -1.2350       | 1        | 4         | 60           | 4        | K.VMQTPKIQEQFR.Q                                 |
| <a href="#">8149</a>  | <b>914.6886</b> | <b>1827.3627</b> | <b>1825.9250</b> | <b>1.4377</b> | <b>0</b> | <b>71</b> | <b>1e-05</b> | <b>1</b> | <b>R.LGLPEPPSFEEWVAQK.E</b> <a href="#">8137</a> |
| <a href="#">9646</a>  | 1001.2456       | 2000.4767        | 2002.0596        | -1.5828       | 2        | 1         | 1.1e+02      | 9        | R.KSGGLDNYLLDDRPGRVK.E                           |
| <a href="#">10832</a> | 715.9919        | 2144.9537        | 2143.0732        | 1.8805        | 1        | 1         | 1e+02        | 6        | K.QSNSGLYGGVMIQFGNKISK.G                         |
| <a href="#">13966</a> | 866.2909        | 2595.8507        | 2596.3020        | -0.4513       | 2        | 0         | 1.2e+02      | 5        | K.AQAEDLTNIKEITKPTYNEKQY.-                       |

255. [gi|220695578|gb|EED51921.1|](#) Mass: 73009 Score: 101 Queries matched: 15 emPAI: 0.09

aminopeptidase P, putative [Aspergillus flavus NRRL3357]

| Query                 | Observed         | Mr(expt)         | Mr(calc)         | Delta         | Miss     | Score     | Expect         | Rank     | Peptide                                                                                                       |
|-----------------------|------------------|------------------|------------------|---------------|----------|-----------|----------------|----------|---------------------------------------------------------------------------------------------------------------|
| <a href="#">3777</a>  | <b>713.4416</b>  | <b>1424.8687</b> | <b>1424.7987</b> | <b>0.0700</b> | <b>0</b> | <b>74</b> | <b>5.8e-06</b> | <b>1</b> | <b>K.VGVDPALITASGAR.S</b> <a href="#">3775</a> <a href="#">3795</a> <a href="#">3808</a> <a href="#">3809</a> |
| <a href="#">4832</a>  | <b>771.7556</b>  | <b>1541.4967</b> | <b>1540.8348</b> | <b>0.6619</b> | <b>0</b> | <b>28</b> | <b>0.21</b>    | <b>1</b> | <b>R.NLIEPSLLSDAELK.W</b>                                                                                     |
| <a href="#">5401</a>  | 532.6612         | 1594.9617        | 1594.6801        | 0.2817        | 0        | 4         | 55             | 7        | K.THHFFENDEYTR.S                                                                                              |
| <a href="#">6227</a>  | 554.1692         | 1659.4857        | 1656.7824        | 2.7033        | 1        | 8         | 25             | 5        | K.NDVELAGMRACHIR.D <a href="#">6223</a>                                                                       |
| <a href="#">7497</a>  | 885.2546         | 1768.4947        | 1767.9301        | 0.5646        | 1        | 3         | 72             | 2        | R.IENVIMAREVQTHK.F                                                                                            |
| <a href="#">9076</a>  | 965.7201         | 1929.4257        | 1930.0007        | -0.5750       | 2        | 2         | 88             | 6        | K.KSTLDEVDAADKLEQIR.S                                                                                         |
| <a href="#">9883</a>  | <b>1014.9136</b> | <b>2027.8127</b> | <b>2026.0848</b> | <b>1.7280</b> | <b>0</b> | <b>34</b> | <b>0.052</b>   | <b>1</b> | <b>K.NGSTLVGVQQNLVDLVWGK.D</b>                                                                                |
| <a href="#">12034</a> | <b>771.4205</b>  | <b>2311.2397</b> | <b>2310.1532</b> | <b>1.0866</b> | <b>1</b> | <b>18</b> | <b>2.1</b>     | <b>1</b> | <b>R.DGAALTEYFAWLENELVNKK.S</b> <a href="#">12050</a>                                                         |
| <a href="#">16380</a> | 1156.4262        | 3466.2567        | 3466.7368        | -0.4801       | 2        | 0         | 76             | 5        | R.EFISGFSGSAGTAIVSLSKAALSTDGRYFNQASK.Q                                                                        |

256. [gi|220693985|gb|EED50330.1|](#) Mass: 17736 Score: 101 Queries matched: 7 emPAI: 0.19

conserved hypothetical protein [Aspergillus flavus NRRL3357]

| Query                | Observed | Mr(expt)  | Mr(calc)  | Delta  | Miss | Score | Expect | Rank | Peptide                                                 |
|----------------------|----------|-----------|-----------|--------|------|-------|--------|------|---------------------------------------------------------|
| <a href="#">1680</a> | 578.2781 | 1154.5417 | 1154.4781 | 0.0636 | 0    | 6     | 36     | 6    | R.DPHGDWWDK.Q <a href="#">1678</a> <a href="#">1684</a> |

[2128](#)   **620.6981**   **1239.3817**   **1238.7095**   **0.6722**   **2**   **9**   **17**   **4**   **K.ELGGPNAVKARK.S** [2119](#)  
[15743](#)   **1039.5429**   **3115.6067**   **3114.4683**   **1.1384**   **0**   **67**   **2.1e-05**   **1**   **R.NFGEPVHEENEILGVFSPEQYTHVTSR.K** [15745](#)

257. [gi|220694594|gb|EED50938.1|](#)   **Mass:** 53680   **Score:** 101   **Queries matched:** 17   **emPAI:** 0.20

NADH-ubiquinone oxidoreductase 49 kDa subunit, putative [Aspergillus flavus NRRL3357]

| Query                | Observed        | Mr(expt)         | Mr(calc)         | Delta          | Miss     | Score     | Expect       | Rank      | Peptide                                         |
|----------------------|-----------------|------------------|------------------|----------------|----------|-----------|--------------|-----------|-------------------------------------------------|
| <a href="#">231</a>  | 400.5331        | 799.0517         | 798.4712         | 0.5806         | 1        | 8         | 29           | 8         | R.LAGSAPKR.L                                    |
| <a href="#">1250</a> | 1080.5840       | 1079.5767        | 1079.5862        | -0.0095        | 1        | 4         | 62           | 6         | R.GTEKLLIEYK.T                                  |
| <a href="#">1279</a> | 543.3551        | 1084.6957        | 1082.5906        | 2.1051         | 1        | 6         | 48           | 8         | K.LSPPPRAAMK.E                                  |
| <a href="#">1447</a> | 1116.5590       | 1115.5517        | 1113.6043        | 1.9474         | 0        | 13        | 9.6          | 2         | R.ADPHVGLLHR.G <a href="#">1449</a>             |
| <a href="#">2268</a> | <b>629.8371</b> | <b>1257.6597</b> | <b>1256.7313</b> | <b>0.9284</b>  | <b>2</b> | <b>3</b>  | <b>85</b>    | <b>10</b> | <b>R.SRSIATTLPRR.Q</b>                          |
| <a href="#">3637</a> | <b>702.7536</b> | <b>1403.4927</b> | <b>1403.6544</b> | <b>-0.1616</b> | <b>0</b> | <b>10</b> | <b>17</b>    | <b>1</b>  | <b>K.TYMQUALPYFDR.L</b>                         |
| <a href="#">3906</a> | <b>480.1112</b> | <b>1437.3117</b> | <b>1435.6588</b> | <b>1.6529</b>  | <b>1</b> | <b>6</b>  | <b>36</b>    | <b>5</b>  | <b>K.YIRTMFGEMTR.I</b>                          |
| <a href="#">4591</a> | <b>760.2301</b> | <b>1518.4457</b> | <b>1516.8137</b> | <b>1.6320</b>  | <b>0</b> | <b>33</b> | <b>0.084</b> | <b>1</b>  | <b>R.LIPTDPTFTSLANK.E</b> <a href="#">4594</a>  |
| <a href="#">7322</a> | 876.4496        | 1750.8847        | 1748.8621        | 2.0226         | 0        | 15        | 4.5          | 1         | K.GYAVPPGETYSAIEAPK.G <a href="#">7323</a>      |
| <a href="#">8160</a> | <b>610.7699</b> | <b>1829.2877</b> | <b>1827.9341</b> | <b>1.3536</b>  | <b>0</b> | <b>36</b> | <b>0.039</b> | <b>1</b>  | <b>K.ENMEALIHFFLLFSK.G</b> <a href="#">8161</a> |
| <a href="#">8984</a> | <b>639.7815</b> | <b>1916.3227</b> | <b>1913.8942</b> | <b>2.4286</b>  | <b>0</b> | <b>10</b> | <b>13</b>    | <b>1</b>  | <b>K.GEMGVFLVSDGSRPYR.C</b>                     |
| <a href="#">9658</a> | 668.3265        | 2001.9577        | 2000.0129        | 1.9448         | 0        | 52        | 0.00078      | 1         | R.HYTVNFGPQHAAHGVLRL.L <a href="#">9650</a>     |

258. [gi|220696680|gb|EED53022.1|](#)   **Mass:** 57267   **Score:** 100   **Queries matched:** 14   **emPAI:** 0.06

cystathionine beta-synthase, putative [Aspergillus flavus NRRL3357]

| Query                 | Observed         | Mr(expt)         | Mr(calc)         | Delta          | Miss     | Score     | Expect         | Rank     | Peptide                                                                    |
|-----------------------|------------------|------------------|------------------|----------------|----------|-----------|----------------|----------|----------------------------------------------------------------------------|
| <a href="#">561</a>   | 914.7820         | 913.7747         | 913.5484         | 0.2263         | 0        | 10        | 16             | 3        | K.TIITLPEK.M                                                               |
| <a href="#">3343</a>  | <b>458.1262</b>  | <b>1371.3567</b> | <b>1372.6333</b> | <b>-1.2766</b> | <b>0</b> | <b>5</b>  | <b>53</b>      | <b>5</b> | <b>K.SPVS<del>D</del>V<del>M</del>FNFSK.I</b>                              |
| <a href="#">5856</a>  | 816.3906         | 1630.7667        | 1629.8620        | 0.9047         | 2        | 0         | 1.4e+02        | 10       | R.IALRMIEEAERSGR.I                                                         |
| <a href="#">8305</a>  | 924.7101         | 1847.4057        | 1847.9815        | -0.5758        | 1        | 8         | 24             | 2        | R.KFVEITMDTPLGVLNR.F                                                       |
| <a href="#">8638</a>  | <b>629.5095</b>  | <b>1885.5067</b> | <b>1884.8853</b> | <b>0.6214</b>  | <b>0</b> | <b>71</b> | <b>1.1e-05</b> | <b>1</b> | <b>R.TPNEAAYDSPESHIGVAK.R</b> <a href="#">8645</a>                         |
| <a href="#">9404</a>  | 658.1575         | 1971.4507        | 1970.1485        | 1.3022         | 2        | 1         | 1.2e+02        | 10       | K.TIITLPEKMSAEKVAVLK.A                                                     |
| <a href="#">12061</a> | <b>1158.2201</b> | <b>2314.4257</b> | <b>2312.2587</b> | <b>2.1670</b>  | <b>0</b> | <b>2</b>  | <b>81</b>      | <b>1</b> | <b>R.LIAEEGLLVGGSSGSAISALAQAQAK.D</b>                                      |
| <a href="#">12680</a> | 805.1609         | 2412.4607        | 2411.2081        | 1.2527         | 2        | 4         | 46             | 10       | R.TPNEAAYDSPESHIGVAKRLEK.E                                                 |
| <a href="#">13117</a> | <b>824.4585</b>  | <b>2470.3537</b> | <b>2468.3598</b> | <b>1.9939</b>  | <b>1</b> | <b>2</b>  | <b>80</b>      | <b>3</b> | <b>R.RLIAEEGLLVGGSSGSAISALAQAQAK.D</b>                                     |
| <a href="#">13543</a> | 841.9519         | 2522.8337        | 2520.4163        | 2.4174         | 0        | 9         | 15             | 2        | R.IKPGDTLIEPTSGNTGIGLALVGAVK.G <a href="#">13492</a> <a href="#">13506</a> |
| <a href="#">14609</a> | 903.7092         | 2708.1057        | 2706.3139        | 1.7918         | 1        | 1         | 98             | 5        | R.LKPITTVQSNTPCETAIEMMRDR.G                                                |

259. [gi|220688465|gb|EED44818.1|](#)   **Mass:** 23039   **Score:** 99   **Queries matched:** 14   **emPAI:** 0.15

xanthine-guanine phosphoribosyl transferase Xpt1, putative [Aspergillus flavus NRRL3357]

| Query                | Observed        | Mr(expt)         | Mr(calc)         | Delta         | Miss     | Score    | Expect    | Rank      | Peptide                              |
|----------------------|-----------------|------------------|------------------|---------------|----------|----------|-----------|-----------|--------------------------------------|
| <a href="#">2401</a> | 637.1831        | 1272.3517        | 1270.6629        | 1.6888        | 1        | 9        | 23        | 7         | K.DVEQAQKQLGR.E <a href="#">2393</a> |
| <a href="#">2633</a> | <b>433.0455</b> | <b>1296.1147</b> | <b>1293.5693</b> | <b>2.5454</b> | <b>0</b> | <b>6</b> | <b>38</b> | <b>10</b> | <b>K.GVLPAD<del>M</del>MESGR.Y</b>   |

|                       |                  |                  |                  |               |          |           |                |          |                                                                        |
|-----------------------|------------------|------------------|------------------|---------------|----------|-----------|----------------|----------|------------------------------------------------------------------------|
| <a href="#">3633</a>  | 702.6781         | 1403.3417        | 1400.7147        | 2.6270        | 0        | 4         | 64             | 4        | K.NILIVDEVDTR.T                                                        |
| <a href="#">5935</a>  | <b>546.7549</b>  | <b>1637.2427</b> | <b>1636.7913</b> | <b>0.4515</b> | <b>2</b> | <b>1</b>  | <b>1.2e+02</b> | <b>5</b> | <b>K.SKKGVLPA<del>MM</del>ESGR.Y</b>                                   |
| <a href="#">9117</a>  | <b>968.3436</b>  | <b>1934.6727</b> | <b>1933.9819</b> | <b>0.6908</b> | <b>0</b> | <b>2</b>  | <b>87</b>      | <b>1</b> | <b>R.TQWLDLSSLEMANLIGK.N</b>                                           |
| <a href="#">11443</a> | <b>1114.3841</b> | <b>2226.7537</b> | <b>2225.1692</b> | <b>1.5846</b> | <b>0</b> | <b>59</b> | <b>0.00014</b> | <b>1</b> | <b>R.AGEPNIPIQAI<del>GLS</del>LYEDLGR.G <a href="#">11437</a></b>      |
| <a href="#">11583</a> | 1126.3406        | 2250.6667        | 2248.1699        | 2.4968        | 2        | 2         | 90             | 5        | R.TTLEYAVRELQKDVEQAQK.Q <a href="#">11586</a>                          |
| <a href="#">12122</a> | 775.4849         | 2323.4327        | 2324.0572        | -0.6245       | 0        | 6         | 37             | 4        | R.YHAAVTDDVWICYPWEAK.D <a href="#">12127</a>                           |
| <a href="#">15162</a> | <b>953.7299</b>  | <b>2858.1677</b> | <b>2856.5497</b> | <b>1.6180</b> | <b>2</b> | <b>11</b> | <b>8.9</b>     | <b>1</b> | <b>R.SFLKRAGEPNIPIQAI<del>GLS</del>LYEDLGR.G <a href="#">15163</a></b> |

260. [gi|220700344|gb|EED56682.1|](#) Mass: 153300 Score: 99 Queries matched: 30 emPAI: 0.04

DNA mismatch repair protein Msh3 [Aspergillus flavus NRRL3357]

| Query                 | Observed        | Mr(expt)         | Mr(calc)         | Delta          | Miss     | Score     | Expect         | Rank      | Peptide                                                    |
|-----------------------|-----------------|------------------|------------------|----------------|----------|-----------|----------------|-----------|------------------------------------------------------------|
| <a href="#">790</a>   | 980.3830        | 979.3757         | 979.5702         | -0.1945        | 1        | 3         | 70             | 6         | R.KLTNLYTK.G                                               |
| <a href="#">2031</a>  | <b>613.4951</b> | <b>1224.9757</b> | <b>1223.5670</b> | <b>1.4087</b>  | <b>0</b> | <b>13</b> | <b>8.2</b>     | <b>2</b>  | <b>K.FASSPATEGETK.E</b>                                    |
| <a href="#">2414</a>  | 637.7276        | 1273.4407        | 1271.5928        | 1.8479         | 1        | 10        | 17             | 4         | K.INMHAAKNDDK.Y                                            |
| <a href="#">2776</a>  | <b>438.9419</b> | <b>1313.8037</b> | <b>1314.7871</b> | <b>-0.9833</b> | <b>2</b> | <b>24</b> | <b>0.71</b>    | <b>2</b>  | <b>R.IKTDLEKSLIR.V</b>                                     |
| <a href="#">2869</a>  | <b>663.6141</b> | <b>1325.2137</b> | <b>1324.6598</b> | <b>0.5539</b>  | <b>0</b> | <b>6</b>  | <b>39</b>      | <b>1</b>  | <b>K.YVLCQYNIPR.S</b>                                      |
| <a href="#">3403</a>  | 689.2721        | 1376.5297        | 1374.6813        | 1.8484         | 0        | (5)       | 57             | 10        | -.MPLSSQPSSSNLK.R                                          |
| <a href="#">3522</a>  | <b>696.4721</b> | <b>1390.9297</b> | <b>1391.7144</b> | <b>-0.7847</b> | <b>1</b> | <b>1</b>  | <b>1.3e+02</b> | <b>6</b>  | <b>K.LEGVDDTSKLSK.I</b>                                    |
| <a href="#">3531</a>  | <b>464.9512</b> | <b>1391.8317</b> | <b>1390.6762</b> | <b>1.1555</b>  | <b>0</b> | <b>14</b> | <b>6.6</b>     | <b>1</b>  | <b>-.MPLSSQPSSSNLK.R</b>                                   |
| <a href="#">3538</a>  | 697.3056        | 1392.5967        | 1391.7694        | 0.8273         | 2        | 0         | 1.4e+02        | 8         | K.KKIATVMDELTK.V                                           |
| <a href="#">3795</a>  | 713.8796        | 1425.7447        | 1423.7493        | 1.9954         | 1        | 2         | 86             | 5         | R.SAKLGMLDAVFTR.M                                          |
| <a href="#">4062</a>  | 485.5882        | 1453.7427        | 1453.7889        | -0.0461        | 0        | 4         | 63             | 6         | R.NAQNPLVELITSR.I                                          |
| <a href="#">6433</a>  | 837.9236        | 1673.8327        | 1674.8723        | -1.0395        | 2        | 1         | 1.1e+02        | 6         | -.MPLSSQPSSSNLKRK.Q                                        |
| <a href="#">6741</a>  | 566.3609        | 1696.0607        | 1696.9220        | -0.8613        | 1        | 8         | 25             | 2         | K.SRNAQNPLVELITSR.I                                        |
| <a href="#">7288</a>  | <b>873.9531</b> | <b>1745.8917</b> | <b>1744.9036</b> | <b>0.9881</b>  | <b>0</b> | <b>84</b> | <b>6.1e-07</b> | <b>1</b>  | <b>R.NVVTSTALTEAFFAK.L <a href="#">7296</a></b>            |
| <a href="#">7349</a>  | 878.3766        | 1754.7387        | 1754.8125        | -0.0737        | 1        | 8         | 22             | 5         | K.FRFDEHPSEHLDR.F <a href="#">7365</a>                     |
| <a href="#">9382</a>  | <b>657.2539</b> | <b>1968.7397</b> | <b>1966.1072</b> | <b>2.6326</b>  | <b>2</b> | <b>15</b> | <b>4.2</b>     | <b>1</b>  | <b>K.SRNAQNPLVELITSRIR.G <a href="#">9380</a></b>          |
| <a href="#">9656</a>  | <b>668.2045</b> | <b>2001.5917</b> | <b>2001.0425</b> | <b>0.5492</b>  | <b>2</b> | <b>4</b>  | <b>55</b>      | <b>2</b>  | <b>K.VGVVRQMETAALKAAGDNR.N</b>                             |
| <a href="#">10745</a> | <b>712.5535</b> | <b>2134.6387</b> | <b>2133.0385</b> | <b>1.6002</b>  | <b>2</b> | <b>5</b>  | <b>43</b>      | <b>1</b>  | <b>R.QMETAALKAAGDNRNAPFGR.K <a href="#">10735</a></b>      |
| <a href="#">12137</a> | 776.1942        | 2325.5607        | 2323.2940        | 2.2667         | 0        | 23        | 0.63           | 1         | K.NLPIALIFLPAADIPTFVGEGR.V                                 |
| <a href="#">13287</a> | <b>831.6855</b> | <b>2492.0347</b> | <b>2489.2697</b> | <b>2.7651</b>  | <b>1</b> | <b>9</b>  | <b>17</b>      | <b>1</b>  | <b>R.GTSTHDGVAIAQAVLDYMIRSIR.S <a href="#">13288</a></b>   |
| <a href="#">14316</a> | <b>887.8535</b> | <b>2660.5387</b> | <b>2660.1514</b> | <b>0.3873</b>  | <b>2</b> | <b>8</b>  | <b>17</b>      | <b>1</b>  | <b>K.NDDKYEFFRESEETDEITEHK.L <a href="#">14296</a></b>     |
| <a href="#">14785</a> | <b>916.8972</b> | <b>2747.6697</b> | <b>2746.2093</b> | <b>1.4604</b>  | <b>0</b> | <b>1</b>  | <b>84</b>      | <b>10</b> | <b>R.NTAPEAVPEEVGEGDEDEPSPPPAK.G <a href="#">14783</a></b> |
| <a href="#">15783</a> | 1046.7159       | 3137.1257        | 3134.7492        | 2.3765         | 1        | 0         | 86             | 4         | K.NLPIALIFLPAADIPTFVGEGRVDLGITGR.D                         |

261. [gi|220697500|gb|EED53841.1|](#) Mass: 72158 Score: 98 Queries matched: 18 emPAI: 0.09

ATP dependent RNA helicase (Dbp1), putative [Aspergillus flavus NRRL3357]

| Query               | Observed | Mr(expt) | Mr(calc) | Delta   | Miss | Score | Expect | Rank | Peptide      |
|---------------------|----------|----------|----------|---------|------|-------|--------|------|--------------|
| <a href="#">194</a> | 780.7870 | 779.7797 | 781.3355 | -1.5558 | 0    | 3     | 71     | 2    | R.EGSGYGGR.G |

|                       |          |           |           |         |   |    |         |    |                                                     |
|-----------------------|----------|-----------|-----------|---------|---|----|---------|----|-----------------------------------------------------|
| <a href="#">210</a>   | 786.5970 | 785.5897  | 785.5011  | 0.0887  | 0 | 5  | 57      | 6  | R.ISLVNIK.Y                                         |
| <a href="#">877</a>   | 999.5510 | 998.5437  | 998.6236  | -0.0799 | 1 | 7  | 33      | 6  | R.GRISLVNIK.Y <a href="#">878</a>                   |
| <a href="#">1187</a>  | 534.7106 | 1067.4067 | 1066.5229 | 0.8838  | 1 | 2  | 90      | 9  | R.ERALEMFR.S                                        |
| <a href="#">1660</a>  | 575.6406 | 1149.2667 | 1148.6012 | 0.6655  | 0 | 8  | 25      | 10 | K.YSIPIVMNGR.D                                      |
| <a href="#">2008</a>  | 611.1711 | 1220.3277 | 1219.5840 | 0.7437  | 2 | 9  | 25      | 2  | R.GRGANATRDMR.R                                     |
| <a href="#">3004</a>  | 670.1771 | 1338.3397 | 1338.6680 | -0.3283 | 0 | 39 | 0.021   | 1  | R.AGNTGIATAFFNR.G <a href="#">2999</a>              |
| <a href="#">3835</a>  | 716.1791 | 1430.3437 | 1429.8293 | 0.5145  | 1 | 7  | 30      | 7  | R.KAYPTSLILAPTR.E                                   |
| <a href="#">6530</a>  | 561.3849 | 1681.1327 | 1680.8253 | 0.3074  | 1 | 13 | 8.4     | 1  | K.RMADSLSDFLNQR.F                                   |
| <a href="#">12369</a> | 790.1639 | 2367.4697 | 2368.1337 | -0.6640 | 1 | 1  | 91      | 9  | K.YSIPIVMNGRDLMACAQTGSGK.T                          |
| <a href="#">13147</a> | 825.6692 | 2473.9857 | 2475.1778 | -1.1921 | 1 | 1  | 98      | 10 | K.EAHQEVPSFLESIAREGSGYGR.G                          |
| <a href="#">13556</a> | 842.4692 | 2524.3857 | 2522.3380 | 2.0477  | 1 | 1  | 97      | 4  | R.DLIDLLKEAHQEVPSFLESIAE.E                          |
| <a href="#">14936</a> | 929.9089 | 2786.7047 | 2787.2915 | -0.5868 | 1 | 4  | 40      | 1  | -.MADSLKMGSLSLNESQHAPAPNSSSGR.A                     |
| <a href="#">15247</a> | 965.9239 | 2894.7497 | 2893.4247 | 1.3251  | 0 | 53 | 0.00046 | 1  | R.GLDIPNVTHVINYDLPTDIDDYVHR.I <a href="#">15242</a> |
| <a href="#">15406</a> | 992.8909 | 2975.6507 | 2975.3693 | 0.2815  | 1 | 0  | 1e+02   | 7  | R.QRQTGANMDGAPAAAPPAPGPSGPGNSWGSR.G                 |

262. [gi|220700881|gb|EED57219.1|](#) Mass: 39353 Score: 98 Queries matched: 9 emPAI: 0.17

casein kinase, putative [Aspergillus flavus NRRL3357]

| Query                 | Observed | Mr(expt)  | Mr(calc)  | Delta   | Miss | Score | Expect  | Rank | Peptide                                                                                |
|-----------------------|----------|-----------|-----------|---------|------|-------|---------|------|----------------------------------------------------------------------------------------|
| <a href="#">3583</a>  | 699.8771 | 1397.7397 | 1397.6715 | 0.0683  | 0    | 57    | 0.00033 | 1    | R.FVSDEAIDFLDK.L <a href="#">3579</a>                                                  |
| <a href="#">7620</a>  | 593.7605 | 1778.2597 | 1779.9407 | -1.6810 | 1    | 5     | 46      | 10   | R.FVSDEAIDFLDKLLR.Y                                                                    |
| <a href="#">8281</a>  | 923.4396 | 1844.8647 | 1845.9010 | -1.0362 | 1    | 5     | 41      | 9    | R.KEPFFHGNNSNSDQLVK.I                                                                  |
| <a href="#">9315</a>  | 981.3756 | 1960.7367 | 1960.1469 | 0.5898  | 0    | 57    | 0.00027 | 1    | K.ILQNLAGGPNVVALLDVVR.D <a href="#">9311</a> <a href="#">9318</a> <a href="#">9337</a> |
| <a href="#">13395</a> | 836.5535 | 2506.6387 | 2505.3915 | 1.2472  | 1    | 1     | 1e+02   | 5    | K.ILQNLAGGPNVVALLDVVRDSQSK.T                                                           |

263. [gi|220697523|gb|EED53864.1|](#) Mass: 22794 Score: 98 Queries matched: 6 emPAI: 0.15

proteasome component Pup3, putative [Aspergillus flavus NRRL3357]

| Query                | Observed | Mr(expt)  | Mr(calc)  | Delta   | Miss | Score | Expect  | Rank | Peptide                                     |
|----------------------|----------|-----------|-----------|---------|------|-------|---------|------|---------------------------------------------|
| <a href="#">4767</a> | 768.6681 | 1535.3217 | 1534.7814 | 0.5404  | 0    | 10    | 15      | 1    | R.LGMQALTVSNNFPK.I                          |
| <a href="#">8396</a> | 928.7056 | 1855.3967 | 1855.8267 | -0.4300 | 0    | (5)   | 48      | 6    | -.MSSPFDINGGACVAMVGK.D <a href="#">8380</a> |
| <a href="#">8545</a> | 625.2199 | 1872.6377 | 1871.8216 | 0.8161  | 0    | 7     | 28      | 4    | -.MSSPFDINGGACVAMVGK.D                      |
| <a href="#">9429</a> | 988.4616 | 1974.9087 | 1975.0374 | -0.1287 | 0    | 98    | 2.3e-08 | 1    | R.NIAPQTLANLVSSSLYER.R <a href="#">9447</a> |

264. [gi|220699291|gb|EED55630.1|](#) Mass: 22797 Score: 98 Queries matched: 8 emPAI: 0.51

40S ribosomal protein S8e [Aspergillus flavus NRRL3357]

| Query                | Observed | Mr(expt)  | Mr(calc)  | Delta  | Miss | Score | Expect  | Rank | Peptide                                                       |
|----------------------|----------|-----------|-----------|--------|------|-------|---------|------|---------------------------------------------------------------|
| <a href="#">27</a>   | 650.4840 | 649.4767  | 649.3547  | 0.1220 | 1    | 20    | 1.6     | 2    | K.RAFEK.G <a href="#">28</a>                                  |
| <a href="#">2214</a> | 625.8826 | 1249.7507 | 1249.6415 | 0.1093 | 2    | 4     | 58      | 2    | K.KQAERFAESGK.V                                               |
| <a href="#">5797</a> | 813.7386 | 1625.4627 | 1624.7481 | 0.7146 | 0    | 84    | 5.7e-07 | 1    | R.LESGNFSWGSEGISR.K <a href="#">5816</a>                      |
| <a href="#">6925</a> | 855.7396 | 1709.4647 | 1708.9260 | 0.5387 | 0    | 34    | 0.053   | 1    | R.VIVVAYHPSNNELVR.T <a href="#">6927</a> <a href="#">6930</a> |



265. [gi|220700470|gb|EED56808.1|](#) Mass: 16863 Score: 98 Queries matched: 7 emPAI: 0.73  
40S ribosomal protein S13 [Aspergillus flavus NRRL3357]

| Query                | Observed | Mr(expt)  | Mr(calc)  | Delta  | Miss | Score | Expect  | Rank | Peptide                                                                                                   |
|----------------------|----------|-----------|-----------|--------|------|-------|---------|------|-----------------------------------------------------------------------------------------------------------|
| <a href="#">326</a>  | 422.6636 | 843.3127  | 842.5225  | 0.7902 | 0    | 26    | 0.47    | 1    | R.LILIESR.I <a href="#">325</a>                                                                           |
| <a href="#">8614</a> | 941.5621 | 1881.1097 | 1880.9883 | 0.1214 | 0    | 56    | 0.00036 | 1    | K.SSGLAPELPEDLYHLIK.K <a href="#">8619</a> <a href="#">8622</a> <a href="#">8626</a> <a href="#">8627</a> |

266. [gi|220690774|gb|EED47123.1|](#) Mass: 38099 Score: 97 Queries matched: 7 emPAI: 0.18  
thioredoxin reductase Trr1/Trr2, putative [Aspergillus flavus NRRL3357]

| Query                 | Observed  | Mr(expt)  | Mr(calc)  | Delta   | Miss | Score | Expect  | Rank | Peptide                                                |
|-----------------------|-----------|-----------|-----------|---------|------|-------|---------|------|--------------------------------------------------------|
| <a href="#">3144</a>  | 677.3286  | 1352.6427 | 1351.6983 | 0.9444  | 0    | 73    | 7e-06   | 1    | R.FGTEVITETISR.V <a href="#">3154</a>                  |
| <a href="#">6695</a>  | 846.8921  | 1691.7697 | 1691.9617 | -0.1920 | 2    | 3     |         | 72   | 3 K.AMANRLLSHPKVTVR.F                                  |
| <a href="#">8772</a>  | 632.8565  | 1895.5477 | 1895.0629 | 0.4849  | 0    | 1     | 1.1e+02 | 10   | K.VVIIGSGPAAHTAAIYLSR.A                                |
| <a href="#">15272</a> | 971.8412  | 2912.5017 | 2912.5365 | -0.0347 | 1    | 2     |         | 61   | 5 K.VTVRFNTVATQVLGDEKPMGLMTHLR.V <a href="#">15274</a> |
| <a href="#">15484</a> | 1007.6459 | 3019.9157 | 3017.4618 | 2.4539  | 0    | 55    | 0.00038 | 1    | K.NTVTGEETVDANGLFYAVGHDPATALVK.G                       |

267. [gi|220691607|gb|EED47955.1|](#) Mass: 128918 Score: 97 Queries matched: 27 emPAI: 0.03  
ubiquitin C-terminal hydrolase, putative [Aspergillus flavus NRRL3357]

| Query                 | Observed  | Mr(expt)  | Mr(calc)  | Delta   | Miss | Score | Expect  | Rank | Peptide                                                                           |
|-----------------------|-----------|-----------|-----------|---------|------|-------|---------|------|-----------------------------------------------------------------------------------|
| <a href="#">501</a>   | 902.6180  | 901.6107  | 901.5709  | 0.0398  | 2    | 9     |         | 25   | 3 R.LSKRTGIK.G <a href="#">500</a>                                                |
| <a href="#">1722</a>  | 1164.7460 | 1163.7387 | 1162.5329 | 1.2059  | 1    | 3     |         | 76   | 6 K.MTYDQFSKK.V                                                                   |
| <a href="#">2081</a>  | 617.7111  | 1233.4077 | 1232.6587 | 0.7490  | 0    | 6     |         | 47   | 2 R.FAPVMASTGKPK.Q                                                                |
| <a href="#">2430</a>  | 638.6911  | 1275.3677 | 1274.6329 | 0.7348  | 2    | 3     |         | 81   | 9 R.KMTYDQFSKK.V                                                                  |
| <a href="#">3079</a>  | 674.4926  | 1346.9707 | 1345.7089 | 1.2618  | 0    | 6     |         | 38   | 2 R.DGTISDLLSGLQK.K                                                               |
| <a href="#">3590</a>  | 700.3761  | 1398.7377 | 1398.7905 | -0.0527 | 1    | 10    |         | 15   | 6 K.SRLDDVLLPIMK.E <a href="#">3588</a> <a href="#">3602</a> <a href="#">3614</a> |
| <a href="#">4213</a>  | 737.7591  | 1473.5037 | 1473.8039 | -0.3001 | 1    | 0     | 1.5e+02 | 3    | R.DGTISDLLSGLQKK.A                                                                |
| <a href="#">4563</a>  | 758.9946  | 1515.9747 | 1515.7690 | 0.2057  | 1    | 3     |         | 81   | 10 K.RSMNAYMLVYIR.K                                                               |
| <a href="#">4613</a>  | 760.9801  | 1519.9457 | 1521.6075 | -1.6618 | 0    | 12    |         | 11   | 3 R.MPEEEVNMGEGER.T                                                               |
| <a href="#">4621</a>  | 761.2551  | 1520.4957 | 1521.6075 | -1.1118 | 0    | (2)   | 1e+02   | 3    | R.MPEEEVNMGEGER.T                                                                 |
| <a href="#">5394</a>  | 798.1886  | 1594.3627 | 1594.8355 | -0.4728 | 0    | 1     | 1.1e+02 | 8    | K.IAGINEFVTLYAER.M                                                                |
| <a href="#">7460</a>  | 883.4866  | 1764.9587 | 1764.9597 | -0.0009 | 1    | 3     |         | 78   | 5 R.FAPVMASTGKPKQFIK.R <a href="#">7469</a>                                       |
| <a href="#">8183</a>  | 917.0996  | 1832.1847 | 1830.8094 | 1.3753  | 1    | 0     | 1.4e+02 | 1    | K.DPDMSVEEAYSRLFQTK.G                                                             |
| <a href="#">8198</a>  | 918.2686  | 1834.5227 | 1832.0349 | 2.4878  | 0    | 2     |         | 85   | 7 K.GVIFESFPPVLHLHLK.R                                                            |
| <a href="#">9904</a>  | 678.1889  | 2031.5447 | 2029.9349 | 1.6098  | 2    | 1     |         | 94   | 5 R.FEYDINRDAMMKINDR.H                                                            |
| <a href="#">11282</a> | 736.1689  | 2205.4847 | 2203.1677 | 2.3170  | 1    | 3     |         | 65   | 2 R.QYYDYLLNRISVTFAPIK.A <a href="#">11281</a>                                    |
| <a href="#">12451</a> | 793.3385  | 2376.9937 | 2375.2532 | 1.7405  | 2    | 1     |         | 90   | 9 R.FWVMVNRQNKTRPDQVIK.D                                                          |
| <a href="#">12761</a> | 808.1442  | 2421.4107 | 2423.3478 | -1.9371 | 1    | 3     |         | 66   | 1 R.DLNRPHGVPPKFKVLPGEVFK.E                                                       |
| <a href="#">12988</a> | 819.2505  | 2454.7297 | 2452.1540 | 2.5757  | 1    | 1     |         | 96   | 1 K.TTRPDQVIKDPDMSVEEAYS.R.F                                                      |
| <a href="#">14600</a> | 903.2049  | 2706.5927 | 2704.4119 | 2.1808  | 1    | 1     |         | 83   | 3 K.VGEHLNVESTHLRFAPVMASTGKPK.Q                                                   |

[15236](#)    **963.9729**    **2888.8967**    **2887.3611**    **1.5356**    **0**    **97**    **2e-08**    **1**    **R.YLEDDDDILSDIVGDSDDLGLDHNK.N**

268. [gi|220693628|gb|EED49973.1|](#)    **Mass:** 34193    **Score:** 97    **Queries matched:** 3    **emPAI:** 0.10

COPII-coated vesicle protein SurF4/Erv29, putative [Aspergillus flavus NRRL3357]

| Query                 | Observed        | Mr(expt)         | Mr(calc)         | Delta         | Miss     | Score     | Expect         | Rank     | Peptide                                               |
|-----------------------|-----------------|------------------|------------------|---------------|----------|-----------|----------------|----------|-------------------------------------------------------|
| <a href="#">6092</a>  | <b>825.5286</b> | <b>1649.0427</b> | <b>1647.8984</b> | <b>1.1443</b> | <b>0</b> | <b>11</b> | <b>11</b>      | <b>1</b> | <b>R.IITQWSDQLLYLR.E</b>                              |
| <a href="#">12498</a> | <b>795.5879</b> | <b>2383.7417</b> | <b>2381.2631</b> | <b>2.4786</b> | <b>0</b> | <b>62</b> | <b>7.6e-05</b> | <b>1</b> | <b>K.IEDWLDLADPVKPYLPAIGR.F</b> <a href="#">12484</a> |

269. [gi|220693132|gb|EED49478.1|](#)    **Mass:** 27297    **Score:** 97    **Queries matched:** 10    **emPAI:** 0.12

Hsp90 binding co-chaperone (Sbal), putative [Aspergillus flavus NRRL3357]

| Query                 | Observed        | Mr(expt)         | Mr(calc)         | Delta          | Miss     | Score     | Expect         | Rank      | Peptide                                       |
|-----------------------|-----------------|------------------|------------------|----------------|----------|-----------|----------------|-----------|-----------------------------------------------|
| <a href="#">136</a>   | 744.0140        | 743.0067         | 742.4701         | 0.5366         | 0        | 10        | 22             | 2         | R.LQLLTR.Y                                    |
| <a href="#">1397</a>  | 554.5946        | 1107.1747        | 1108.5950        | -1.4203        | 1        | 2         | 1.1e+02        | 5         | R.SLNYMQKII.-                                 |
| <a href="#">2350</a>  | 633.9521        | 1265.8897        | 1264.6961        | 1.1936         | 2        | 8         | 22             | 10        | R.RSLNYMQKII.- <a href="#">2351</a>           |
| <a href="#">2488</a>  | <b>641.0111</b> | <b>1280.0077</b> | <b>1281.6611</b> | <b>-1.6534</b> | <b>2</b> | <b>1</b>  | <b>1.2e+02</b> | <b>10</b> | <b>K.SRRSLNYMQK.I</b>                         |
| <a href="#">3128</a>  | <b>676.5871</b> | <b>1351.1597</b> | <b>1349.6827</b> | <b>1.4770</b>  | <b>0</b> | <b>64</b> | <b>5.6e-05</b> | <b>1</b>  | <b>K.ITPTNVTFAGDSK.K</b> <a href="#">3106</a> |
| <a href="#">6739</a>  | <b>566.2832</b> | <b>1695.8277</b> | <b>1692.9271</b> | <b>2.9006</b>  | <b>2</b> | <b>7</b>  |                | <b>28</b> | <b>K.VNHSREVELVLRK.K</b>                      |
| <a href="#">11913</a> | <b>766.7665</b> | <b>2297.2777</b> | <b>2296.1223</b> | <b>1.1555</b>  | <b>1</b> | <b>3</b>  |                | <b>65</b> | <b>K.GVRYEVSLDLYAEIDPENSK.V</b>               |
| <a href="#">14530</a> | 898.6052        | 2692.7937        | 2692.2616        | 0.5321         | 1        | 0         | 1e+02          | 8         | R.YEVSLDLYAEIDPENSKVNHSR.E                    |

270. [gi|220688475|gb|EED44828.1|](#)    **Mass:** 56256    **Score:** 97    **Queries matched:** 18    **emPAI:** 0.12

mitochondrial outer membrane protein (Sam50), putative [Aspergillus flavus NRRL3357]

| Query                 | Observed        | Mr(expt)         | Mr(calc)         | Delta          | Miss     | Score     | Expect       | Rank      | Peptide                                          |
|-----------------------|-----------------|------------------|------------------|----------------|----------|-----------|--------------|-----------|--------------------------------------------------|
| <a href="#">239</a>   | 803.7220        | 802.7147         | 802.4297         | 0.2850         | 2        | 9         | 30           | 4         | R.KGEEGRK.G                                      |
| <a href="#">498</a>   | 451.3111        | 900.6077         | 899.5341         | 1.0736         | 1        | 18        | 2.8          | 2         | R.IHAIYRK.A <a href="#">499</a>                  |
| <a href="#">1144</a>  | <b>530.4606</b> | <b>1058.9067</b> | <b>1059.5713</b> | <b>-0.6646</b> | <b>0</b> | <b>28</b> | <b>0.34</b>  | <b>1</b>  | <b>R.FLVGGPTDVR.G</b>                            |
| <a href="#">2262</a>  | 629.6876        | 1257.3607        | 1256.6196        | 0.7411         | 1        | 7         | 36           | 10        | K.IRWMSQSGHR.H                                   |
| <a href="#">2293</a>  | <b>631.2506</b> | <b>1260.4867</b> | <b>1259.6874</b> | <b>0.7994</b>  | <b>0</b> | <b>34</b> | <b>0.067</b> | <b>1</b>  | <b>R.IFNPLLSSNQK.R</b>                           |
| <a href="#">2693</a>  | 652.2886        | 1302.5627        | 1301.6768        | 0.8859         | 0        | 3         | 90           | 10        | K.AFNELAGWGPKL.G                                 |
| <a href="#">4003</a>  | 724.6456        | 1447.2767        | 1446.8235        | 0.4533         | 0        | 7         | 28           | 4         | R.FELNFSLPLVLR.K <a href="#">4011</a>            |
| <a href="#">6765</a>  | <b>850.2071</b> | <b>1698.3997</b> | <b>1697.8665</b> | <b>0.5332</b>  | <b>0</b> | <b>64</b> | <b>6e-05</b> | <b>1</b>  | <b>R.FDIFQQPVSVYLDK.S</b> <a href="#">6783</a>   |
| <a href="#">8459</a>  | 621.4819        | 1861.4237        | 1862.0050        | -0.5813        | 1        | 6         | 31           | 2         | R.GFLERIFNPLLSSNQK.R                             |
| <a href="#">9045</a>  | 642.7072        | 1925.0997        | 1924.9907        | 0.1090         | 2        | 10        | 13           | 3         | K.AWASHEEALKGWSKIR.W                             |
| <a href="#">10187</a> | 1030.3321       | 2058.6497        | 2056.9742        | 1.6755         | 0        | 12        | 7.8          | 2         | R.SAYQATFETPILSDPDFR.L <a href="#">10192</a>     |
| <a href="#">10658</a> | <b>708.4279</b> | <b>2122.2617</b> | <b>2121.0684</b> | <b>1.1934</b>  | <b>1</b> | <b>3</b>  |              | <b>60</b> | <b>K.AFNELAGWGPKLGDVDFWK.S</b>                   |
| <a href="#">12122</a> | 775.4849        | 2323.4327        | 2325.1964        | -1.7637        | 1        | 2         | 74           | 8         | R.LEIGGIASSTQKAWASHEEALK.G <a href="#">12143</a> |

271. [gi|220692288|gb|EED48635.1|](#)    **Mass:** 40460    **Score:** 96    **Queries matched:** 12    **emPAI:** 0.17

NADH-ubiquinone oxidoreductase 304 kDa subunit precursor [Aspergillus flavus NRRL3357]

| Query                 | Observed         | Mr(expt)         | Mr(calc)         | Delta         | Miss     | Score       | Expect         | Rank     | Peptide                                                   |
|-----------------------|------------------|------------------|------------------|---------------|----------|-------------|----------------|----------|-----------------------------------------------------------|
| <a href="#">1113</a>  | 527.5831         | 1053.1517        | 1053.5059        | -0.3542       | 1        | 11          | 12             | 2        | -. <u>MASARSLMR</u> .L                                    |
| <a href="#">2757</a>  | <b>656.7231</b>  | <b>1311.4317</b> | <b>1310.6507</b> | <b>0.7811</b> | <b>0</b> | <b>48</b>   | <b>0.0027</b>  | <b>1</b> | <b>K.DFPLTGYTELR.Y</b>                                    |
| <a href="#">4613</a>  | 760.9801         | 1519.9457        | 1520.7082        | -0.7625       | 0        | 23          | 0.84           | 1        | R.IMTDYGF <del>GDHPLR</del> .K                            |
| <a href="#">4715</a>  | <b>765.8756</b>  | <b>1529.7367</b> | <b>1527.8661</b> | <b>1.8707</b> | <b>0</b> | <b>78</b>   | <b>2.5e-06</b> | <b>1</b> | <b>R.IVIEPLELTQAFR.N</b> <a href="#">4721</a>             |
| <a href="#">4786</a>  | <b>769.7071</b>  | <b>1537.3997</b> | <b>1536.7031</b> | <b>0.6966</b> | <b>0</b> | <b>(14)</b> | <b>5.5</b>     | <b>1</b> | <b>R.IMTDYGF<del>GDHPLR</del>.K</b>                       |
| <a href="#">6244</a>  | 554.5945         | 1660.7617        | 1661.8995        | -1.1378       | 2        | 5           | 45             | 10       | R.SLMRLGTGRSLASAAR.S                                      |
| <a href="#">7849</a>  | <b>600.0382</b>  | <b>1797.0927</b> | <b>1795.9073</b> | <b>1.1854</b> | <b>1</b> | <b>3</b>    | <b>65</b>      | <b>4</b> | <b>R.SSRMCRPFSTTPLLK.E</b>                                |
| <a href="#">12319</a> | 786.3452         | 2356.0137        | 2354.1431        | 1.8707        | 0        | 1           | 97             | 6        | K.YHTAAEFTQISDITAVDFPTK.D                                 |
| <a href="#">14804</a> | <b>918.8619</b>  | <b>2753.5637</b> | <b>2753.3297</b> | <b>0.2340</b> | <b>1</b> | <b>4</b>    | <b>43</b>      | <b>5</b> | <b>K.YHTAAEFTQISDITAVDFPTKDQR.F</b> <a href="#">14798</a> |
| <a href="#">15838</a> | <b>1057.3292</b> | <b>3168.9657</b> | <b>3167.6291</b> | <b>1.3366</b> | <b>2</b> | <b>6</b>    | <b>25</b>      | <b>1</b> | <b>R.IRVKTYADEATPVPSVTGLFEGALWYER.E</b>                   |

272. [gi|220690385|gb|EED46735.1|](#) Mass: 50863 Score: 96 Queries matched: 15 emPAI: 0.29

dihydrolipoamide succinyltransferase, putative [Aspergillus flavus NRRL3357]

| Query                 | Observed        | Mr(expt)         | Mr(calc)         | Delta          | Miss     | Score       | Expect       | Rank     | Peptide                                                                                       |
|-----------------------|-----------------|------------------|------------------|----------------|----------|-------------|--------------|----------|-----------------------------------------------------------------------------------------------|
| <a href="#">67</a>    | 687.5450        | 686.5377         | 686.3963         | 0.1415         | 0        | 14          | 8.1          | 6        | K.AIADLGK.K                                                                                   |
| <a href="#">314</a>   | <b>421.0041</b> | <b>839.9937</b>  | <b>839.5229</b>  | <b>0.4708</b>  | <b>0</b> | <b>20</b>   | <b>1.3</b>   | <b>1</b> | <b>K.GLVTPVVR.N</b>                                                                           |
| <a href="#">938</a>   | <b>508.3311</b> | <b>1014.6477</b> | <b>1014.4957</b> | <b>0.1520</b>  | <b>0</b> | <b>36</b>   | <b>0.047</b> | <b>1</b> | <b>K.LGFMSAFSR.A</b>                                                                          |
| <a href="#">1556</a>  | <b>566.6856</b> | <b>1131.3567</b> | <b>1132.6856</b> | <b>-1.3289</b> | <b>1</b> | <b>7</b>    | <b>40</b>    | <b>6</b> | <b>R.EAVTFLVKVK.E</b>                                                                         |
| <a href="#">2839</a>  | <b>660.8641</b> | <b>1319.7137</b> | <b>1318.6438</b> | <b>1.0699</b>  | <b>0</b> | <b>(37)</b> | <b>0.032</b> | <b>1</b> | <b>R.NAETMDLVGIEK.A</b>                                                                       |
| <a href="#">2974</a>  | <b>668.6181</b> | <b>1335.2217</b> | <b>1334.6388</b> | <b>0.5830</b>  | <b>0</b> | <b>69</b>   | <b>2e-05</b> | <b>1</b> | <b>R.NAETMDLVGIEK.A</b> <a href="#">2992</a>                                                  |
| <a href="#">3703</a>  | <b>472.4942</b> | <b>1414.4607</b> | <b>1415.7231</b> | <b>-1.2624</b> | <b>1</b> | <b>7</b>    | <b>32</b>    | <b>4</b> | <b>K.TGVKLGFM<del>SAFSR</del>.A</b>                                                           |
| <a href="#">9684</a>  | <b>669.4072</b> | <b>2005.1997</b> | <b>2003.0245</b> | <b>2.1752</b>  | <b>1</b> | <b>22</b>   | <b>0.9</b>   | <b>1</b> | <b>R.NAETMDLVGIEKAIADLGK.K</b> <a href="#">9662</a> <a href="#">9671</a> <a href="#">9676</a> |
| <a href="#">9872</a>  | 1014.5836       | 2027.1527        | 2027.0422        | 0.1105         | 1        | 1           | 1.1e+02      | 2        | K.LELGGAPETKTEEATEKPK.E                                                                       |
| <a href="#">10777</a> | 713.7522        | 2138.2347        | 2140.1562        | -1.9215        | 1        | 3           | 63           | 6        | K.GLVTPVVRNAETMDLVGIEK.A                                                                      |
| <a href="#">13948</a> | 864.7379        | 2591.1917        | 2591.3352        | -0.1435        | 1        | 0           | 1.2e+02      | 6        | K.IEIRPMMYLALTYDHRLLDGR.E                                                                     |

273. [gi|220699042|gb|EED55381.1|](#) Mass: 51095 Score: 96 Queries matched: 17 emPAI: 0.06

homocitrate synthase [Aspergillus flavus NRRL3357]

| Query                 | Observed        | Mr(expt)         | Mr(calc)         | Delta         | Miss     | Score     | Expect       | Rank      | Peptide                                                              |
|-----------------------|-----------------|------------------|------------------|---------------|----------|-----------|--------------|-----------|----------------------------------------------------------------------|
| <a href="#">1395</a>  | 554.2501        | 1106.4857        | 1105.6495        | 0.8362        | 1        | 8         | 27           | 3         | R.FKIIESTLR.E                                                        |
| <a href="#">1611</a>  | 570.5791        | 1139.1437        | 1139.5355        | -0.3918       | 0        | 11        | 11           | 4         | R.MMVADPAYVK.G                                                       |
| <a href="#">1978</a>  | <b>608.4066</b> | <b>1214.7987</b> | <b>1214.6441</b> | <b>0.1546</b> | <b>0</b> | <b>6</b>  | <b>45</b>    | <b>9</b>  | <b>R.NGITPLGGIMAR.M</b>                                              |
| <a href="#">5694</a>  | 540.2372        | 1617.6897        | 1615.8102        | 1.8795        | 2        | 0         | 1.4e+02      | 9         | R.MMVADPAYVKGKYK.L                                                   |
| <a href="#">5699</a>  | 810.2906        | 1618.5667        | 1617.8582        | 0.7085        | 2        | 1         | 1.1e+02      | 8         | R.LDCEAICKLGLKAK.I                                                   |
| <a href="#">5936</a>  | <b>819.6591</b> | <b>1637.3037</b> | <b>1636.8560</b> | <b>0.4478</b> | <b>0</b> | <b>96</b> | <b>4e-08</b> | <b>1</b>  | <b>R.SDLVDLLSIYSAVDK.V</b> <a href="#">5918</a> <a href="#">5956</a> |
| <a href="#">10244</a> | <b>688.7435</b> | <b>2063.2087</b> | <b>2061.1470</b> | <b>2.0618</b> | <b>2</b> | <b>2</b>  | <b>80</b>    | <b>10</b> | <b>K.NTAIEVIEYVKS<del>GIEIR</del>.F</b> <a href="#">10242</a>        |
| <a href="#">10747</a> | 1068.3386       | 2134.6627        | 2135.1111        | -0.4483       | 0        | 3         | 69           | 2         | R.VAVETGVDGVDVVIGTSSYLK.E <a href="#">10743</a>                      |

|                       |                 |                  |                  |                |          |          |                |          |                                       |
|-----------------------|-----------------|------------------|------------------|----------------|----------|----------|----------------|----------|---------------------------------------|
| <a href="#">11558</a> | <b>749.1529</b> | <b>2244.4367</b> | <b>2244.1711</b> | <b>0.2656</b>  | <b>2</b> | <b>1</b> | <b>1.1e+02</b> | <b>6</b> | <b>K.DMTYIKNTAIEVIEYVKS.K</b>         |
| <a href="#">13144</a> | 1237.8821       | 2473.7497        | 2472.1115        | 1.6382         | 0        | 2        | 78             | 2        | K.ALDDFGVDYIELTSPCASEQSR.L            |
| <a href="#">13517</a> | 841.6595        | 2521.9567        | 2521.2855        | 0.6712         | 2        | 13       | 5.6            | 2        | R.NGITPLGGLMARMVADPAYVKGK.Y           |
| <a href="#">13529</a> | 841.7582        | 2522.2527        | 2521.2855        | 0.9672         | 2        | (3)      | 60             | 5        | R.NGITPLGGLMARMVADPAYVKGK.Y           |
| <a href="#">14997</a> | <b>937.4642</b> | <b>2809.3707</b> | <b>2810.4199</b> | <b>-1.0492</b> | <b>1</b> | <b>1</b> | <b>86</b>      | <b>2</b> | <b>R.VAVETGVDGVDVIGTSSYLREHSHGK.D</b> |

274. [gi|220699676|gb|EED56015.1|](#) Mass: 45077 Score: 95 Queries matched: 10 emPAI: 0.15

cAMP-dependent protein kinase regulatory subunit PkaR [Aspergillus flavus NRRL3357]

| Query                 | Observed        | Mr(expt)         | Mr(calc)         | Delta          | Miss     | Score     | Expect         | Rank     | Peptide                                               |
|-----------------------|-----------------|------------------|------------------|----------------|----------|-----------|----------------|----------|-------------------------------------------------------|
| <a href="#">611</a>   | <b>465.8936</b> | <b>929.7727</b>  | <b>928.5229</b>  | <b>1.2498</b>  | <b>0</b> | <b>2</b>  | <b>1.4e+02</b> | <b>7</b> | <b>K.IADALDAIK.F</b> <a href="#">612</a>              |
| <a href="#">1264</a>  | 541.6911        | 1081.3677        | 1079.5433        | 1.8244         | 0        | 5         | 43             | 7        | R.ILMDSAFQR.R                                         |
| <a href="#">3847</a>  | <b>716.4616</b> | <b>1430.9087</b> | <b>1430.7041</b> | <b>0.2046</b>  | <b>0</b> | <b>2</b>  | <b>1e+02</b>   | <b>3</b> | <b>R.AEYEQIQPKPAAS.-</b>                              |
| <a href="#">6909</a>  | <b>855.1691</b> | <b>1708.3237</b> | <b>1707.8104</b> | <b>0.5133</b>  | <b>0</b> | <b>43</b> | <b>0.0069</b>  | <b>1</b> | <b>R.GDYFGELALLDDQPR.A</b>                            |
| <a href="#">10347</a> | 693.5249        | 2077.5527        | 2078.0255        | -0.4728        | 0        | 0         | 1.2e+02        | 6        | K.AGTIGPGGSFGELALMYNAPR.A                             |
| <a href="#">12703</a> | <b>805.7775</b> | <b>2414.3107</b> | <b>2413.2239</b> | <b>1.0868</b>  | <b>0</b> | <b>53</b> | <b>0.00055</b> | <b>1</b> | <b>R.MYEAFLEEVPLLSLKPYER.S</b> <a href="#">12698</a>  |
| <a href="#">13918</a> | <b>862.7052</b> | <b>2585.0937</b> | <b>2585.3199</b> | <b>-0.2262</b> | <b>1</b> | <b>3</b>  | <b>61</b>      | <b>9</b> | <b>R.RMYEAFLEEVPLLSLKPYER.S</b> <a href="#">13922</a> |

275. [gi|220697931|gb|EED54271.1|](#) Mass: 115238 Score: 95 Queries matched: 28 emPAI: 0.09

poly(A)+ RNA transport protein (UbaA), putative [Aspergillus flavus NRRL3357]

| Query                 | Observed         | Mr(expt)         | Mr(calc)         | Delta         | Miss     | Score      | Expect         | Rank     | Peptide                                                                                              |
|-----------------------|------------------|------------------|------------------|---------------|----------|------------|----------------|----------|------------------------------------------------------------------------------------------------------|
| <a href="#">206</a>   | 392.9781         | 783.9417         | 784.4807         | -0.5389       | 0        | 10         | 14             | 9        | K.NIALAGVK.S <a href="#">201</a> <a href="#">202</a>                                                 |
| <a href="#">2634</a>  | 649.1036         | 1296.1927        | 1295.5993        | 0.5934        | 0        | 4          | 64             | 6        | K.QGEIDESLYSR.Q <a href="#">2635</a>                                                                 |
| <a href="#">2804</a>  | 659.2966         | 1316.5787        | 1316.6183        | -0.0396       | 0        | 6          | 42             | 5        | K.DQLAIADFCHK.N                                                                                      |
| <a href="#">3159</a>  | <b>678.4221</b>  | <b>1354.8297</b> | <b>1353.6486</b> | <b>1.1811</b> | <b>0</b> | <b>(3)</b> | <b>78</b>      | <b>9</b> | <b>K.IYVTDMDQIEK.S</b>                                                                               |
| <a href="#">3344</a>  | 686.7266         | 1371.4387        | 1369.6435        | 1.7952        | 0        | 13         | 9.6            | 2        | K.IYVTDMDQIEK.S                                                                                      |
| <a href="#">4474</a>  | 1503.8550        | 1502.8477        | 1501.7850        | 1.0627        | 0        | 13         | 9.2            | 2        | K.VVDNMIPEFTPK.S <a href="#">4454</a> <a href="#">4472</a> <a href="#">4473</a> <a href="#">4486</a> |
| <a href="#">4528</a>  | <b>755.6056</b>  | <b>1509.1967</b> | <b>1507.7558</b> | <b>1.4409</b> | <b>0</b> | <b>24</b>  | <b>0.59</b>    | <b>1</b> | <b>K.FVDYQPLEEQLK.K</b>                                                                              |
| <a href="#">4597</a>  | <b>760.4991</b>  | <b>1518.9837</b> | <b>1517.7562</b> | <b>1.2276</b> | <b>2</b> | <b>0</b>   | <b>1.4e+02</b> | <b>7</b> | <b>R.TYVDRRCVFFR.K</b>                                                                               |
| <a href="#">5572</a>  | 537.2839         | 1608.8297        | 1605.8515        | 2.9783        | 1        | 3          | 74             | 6        | K.SLAGFRLNPVEFEK.D                                                                                   |
| <a href="#">10043</a> | 682.0835         | 2043.2287        | 2041.0745        | 2.1542        | 2        | 8          | 18             | 3        | K.TSSGQPFWSGPKRAPPLK.F                                                                               |
| <a href="#">10075</a> | 682.9585         | 2045.8537        | 2045.9753        | -0.1215       | 1        | 3          | 71             | 2        | K.ISNDLASNQEDKVELDEK.L                                                                               |
| <a href="#">10675</a> | 709.1545         | 2124.4417        | 2123.0681        | 1.3737        | 2        | 7          | 28             | 3        | K.GKIYVTDMDQIEKSNLNR.Q                                                                               |
| <a href="#">14307</a> | 887.5982         | 2659.7727        | 2658.3979        | 1.3749        | 1        | 4          | 46             | 3        | K.GLEISMVSSGVSLLYASFYPPSKVK.D <a href="#">14296</a> <a href="#">14322</a>                            |
| <a href="#">14847</a> | <b>923.7175</b>  | <b>2768.1307</b> | <b>2766.6041</b> | <b>1.5266</b> | <b>2</b> | <b>3</b>   | <b>57</b>      | <b>9</b> | <b>R.MGTSNVLVVGLKGLGVEIAKNIALAGVK.S</b>                                                              |
| <a href="#">15085</a> | 945.1589         | 2832.4547        | 2830.3340        | 2.1208        | 2        | 2          | 66             | 5        | K.NWAMMGLGTGPKGKIYVTDMDQIEK.S                                                                        |
| <a href="#">16025</a> | <b>1094.2612</b> | <b>3279.7617</b> | <b>3278.6823</b> | <b>1.0794</b> | <b>0</b> | <b>20</b>  | <b>1</b>       | <b>1</b> | <b>K.SLTLYDPAPVAISDLSSQFFLQSQDVGKPR.A</b> <a href="#">16024</a>                                      |
| <a href="#">16260</a> | <b>1131.5105</b> | <b>3391.5097</b> | <b>3389.5437</b> | <b>1.9661</b> | <b>0</b> | <b>72</b>  | <b>5.4e-06</b> | <b>1</b> | <b>R.VGQDTEHIFNEEFWEGLDGVTNALDNVDAR.T</b> <a href="#">16262</a>                                      |

276. [gi|209156402|pdb|2ZKA|A](#) Mass: 34370 Score: 94 Queries matched: 14 emPAI: 0.32

Chain A, Urate Oxidase Complexed With 8-Azaxanthine Under 1.0 Mpa Oxygen Pressure

| Query                 | Observed  | Mr(expt)  | Mr(calc)  | Delta   | Miss | Score | Expect  | Rank | Peptide                                         |
|-----------------------|-----------|-----------|-----------|---------|------|-------|---------|------|-------------------------------------------------|
| <a href="#">273</a>   | 410.5556  | 819.0967  | 816.4453  | 2.6514  | 1    | 4     | 73      | 10   | -.DSAVKAAR.Y                                    |
| <a href="#">648</a>   | 474.7731  | 947.5317  | 946.4906  | 1.0412  | 0    | 17    | 4.1     | 2    | K.MAEQILAR.Q                                    |
| <a href="#">1044</a>  | 520.6721  | 1039.3297 | 1037.4930 | 1.8367  | 0    | 4     | 61      | 9    | K.FDATWATAR.E                                   |
| <a href="#">1100</a>  | 526.3086  | 1050.6027 | 1048.5302 | 2.0726  | 0    | 12    | 9.6     | 3    | K.NFSGLQEV.R.S                                  |
| <a href="#">1288</a>  | 1086.6920 | 1085.6847 | 1085.5717 | 0.1130  | 0    | 42    | 0.012   | 1    | R.NVQVDVVEGK.G                                  |
| <a href="#">3045</a>  | 672.1581  | 1342.3017 | 1341.6466 | 0.6551  | 0    | 48    | 0.0027  | 1    | K.STNSQFWGFLR.D <a href="#">3036</a>            |
| <a href="#">4214</a>  | 737.7876  | 1473.5607 | 1473.7041 | -0.1434 | 0    | 10    | 16      | 3    | K.HYFEIDLSWHK.G <a href="#">4227</a>            |
| <a href="#">5060</a>  | 782.1716  | 1562.3287 | 1561.7777 | 0.5511  | 0    | 1     | 1.3e+02 | 3    | R.ILSTDV DATWQWK.N                              |
| <a href="#">5305</a>  | 794.1446  | 1586.2747 | 1585.8001 | 0.4746  | 1    | 1     | 1.2e+02 | 2    | R.SHVPKFDATWATAR.E                              |
| <a href="#">6316</a>  | 556.2842  | 1665.8307 | 1664.8093 | 1.0214  | 0    | 4     | 53      | 5    | R.MDIDGKPHPSFIR.D                               |
| <a href="#">12126</a> | 775.5875  | 2323.7407 | 2323.2212 | 0.5195  | 0    | 28    | 0.23    | 1    | K.QNPVTPPELFGSILGTHFIEK.Y <a href="#">12133</a> |

Proteins matching the same set of peptides:

[gi|209156403|pdb|2ZKB|A](#) Mass: 34370 Score: 94 Queries matched: 14

Chain A, Urate Oxidase Complexed With 8-Azaxanthine Under 2.5 Mpa Oxygen Pressure

[gi|209156470|pdb|3CKS|A](#) Mass: 34370 Score: 94 Queries matched: 14

Chain A, Urate Oxidase Complexed With 8-Azaxanthine Under 4.0 Mpa Oxygen Pressure

[gi|209156471|pdb|3CKU|A](#) Mass: 34370 Score: 94 Queries matched: 14

Chain A, Urate Oxidase From Aspergillus Flavus Complexed With Its Inhibitor 8-Azaxanthin And Chloride

277. [gi|46370500|gb|AAS90034.1|](#) Mass: 43446 Score: 94 Queries matched: 12 emPAI: 0.16

OmtB [Aspergillus flavus]

| Query                 | Observed | Mr(expt)  | Mr(calc)  | Delta   | Miss | Score | Expect  | Rank | Peptide                                                                           |
|-----------------------|----------|-----------|-----------|---------|------|-------|---------|------|-----------------------------------------------------------------------------------|
| <a href="#">649</a>   | 474.9836 | 947.9527  | 947.5440  | 0.4087  | 0    | 45    | 0.0053  | 1    | R.TQAAFGLIK.E                                                                     |
| <a href="#">843</a>   | 495.6116 | 989.2087  | 988.5706  | 0.6382  | 0    | 59    | 0.00023 | 1    | K.VGIDLGIFR.S <a href="#">842</a>                                                 |
| <a href="#">4777</a>  | 769.3351 | 1536.6557 | 1534.7814 | 1.8743  | 0    | 14    | 5.7     | 1    | K.VLMVDIGGGFGQSK.A <a href="#">4744</a> <a href="#">4770</a> <a href="#">4784</a> |
| <a href="#">5794</a>  | 813.6756 | 1625.3367 | 1624.8568 | 0.4799  | 1    | 3     | 70      | 8    | -.MTGLDMEIIFAKIK.E                                                                |
| <a href="#">7588</a>  | 592.6812 | 1775.0217 | 1776.0033 | -0.9816 | 2    | 3     | 73      | 7    | R.SLKKSDTPITLAEFVK.K                                                              |
| <a href="#">8760</a>  | 632.3142 | 1893.9207 | 1890.9986 | 2.9221  | 1    | 2     | 77      | 9    | K.VLMVDIGGGFGQSKALR.A                                                             |
| <a href="#">10446</a> | 697.8545 | 2090.5417 | 2090.1306 | 0.4111  | 2    | 6     | 32      | 6    | K.VLMVDIGGGFGQSKALRAK.F                                                           |
| <a href="#">11743</a> | 759.4955 | 2275.4647 | 2273.1435 | 2.3212  | 2    | 2     | 81      | 7    | -.MTGLDMEIIFAKIKEEYAR.T                                                           |

278. [gi|220693637|gb|EED49982.1|](#) Mass: 21016 Score: 93 Queries matched: 14 emPAI: 0.56

ADP-ribosylation factor, putative [Aspergillus flavus NRRL3357]

| Query               | Observed | Mr(expt) | Mr(calc) | Delta  | Miss | Score | Expect | Rank | Peptide                         |
|---------------------|----------|----------|----------|--------|------|-------|--------|------|---------------------------------|
| <a href="#">129</a> | 738.5340 | 737.5267 | 737.4323 | 0.0944 | 0    | 9     | 15     | 7    | K.TTILYK.L <a href="#">128</a>  |
| <a href="#">378</a> | 858.6040 | 857.5967 | 857.4719 | 0.1248 | 1    | 19    | 2.5    | 4    | R.DRIVEAR.E <a href="#">372</a> |

|                       |                 |                  |                  |                |          |             |                |          |                                                      |
|-----------------------|-----------------|------------------|------------------|----------------|----------|-------------|----------------|----------|------------------------------------------------------|
| <a href="#">5524</a>  | <b>803.3441</b> | <b>1604.6737</b> | <b>1605.7787</b> | <b>-1.1050</b> | <b>0</b> | <b>0</b>    | <b>1.5e+02</b> | <b>4</b> | <b>K.NIQFTVWDVGGQDK.I</b>                            |
| <a href="#">5876</a>  | 817.2341        | 1632.4537        | 1630.8898        | 1.5639         | 2        | 9           | 18             | 8        | K.KEMRILMVGLDAAGK.T                                  |
| <a href="#">6087</a>  | 825.2571        | 1648.4997        | 1646.8847        | 1.6150         | 2        | (3)         | 77             | 8        | K.KEMRILMVGLDAAGK.T                                  |
| <a href="#">6277</a>  | 555.2745        | 1662.8017        | 1662.8797        | -0.0779        | 2        | (7)         | 31             | 6        | K.KEMRILMVGLDAAGK.T                                  |
| <a href="#">10548</a> | <b>702.4549</b> | <b>2104.3427</b> | <b>2103.1034</b> | <b>1.2393</b>  | <b>1</b> | <b>47</b>   | <b>0.0027</b>  | <b>1</b> | <b>R.MLNEDELRLDALLLVFANK.Q <a href="#">10551</a></b> |
| <a href="#">10647</a> | <b>707.6702</b> | <b>2119.9887</b> | <b>2119.0983</b> | <b>0.8904</b>  | <b>1</b> | <b>(39)</b> | <b>0.016</b>   | <b>1</b> | <b>R.MLNEDELRLDALLLVFANK.Q <a href="#">10645</a></b> |
| <a href="#">12770</a> | <b>808.6012</b> | <b>2422.7817</b> | <b>2423.1618</b> | <b>-0.3801</b> | <b>1</b> | <b>12</b>   | <b>6.9</b>     | <b>1</b> | <b>R.HYFQNTQGIIFVVDSDNRDR.I</b>                      |
| <a href="#">13450</a> | <b>838.5842</b> | <b>2512.7307</b> | <b>2510.2799</b> | <b>2.4509</b>  | <b>0</b> | <b>45</b>   | <b>0.0037</b>  | <b>1</b> | <b>K.QDLPNAMSPAETQQLGLQLTR.R</b>                     |

279. [gi|6714971|gb|AAF26223.1|AF159789\\_1](#) Mass: 43304 Score: 92 Queries matched: 19 emPAI: 0.16

O-methyltransferase B [Aspergillus flavus]

| Query                 | Observed        | Mr(expt)         | Mr(calc)         | Delta          | Miss     | Score     | Expect         | Rank     | Peptide                                                                                  |
|-----------------------|-----------------|------------------|------------------|----------------|----------|-----------|----------------|----------|------------------------------------------------------------------------------------------|
| <a href="#">649</a>   | 474.9836        | 947.9527         | 947.5440         | 0.4087         | 0        | 45        | 0.0053         | 1        | R.TQAAFGLIK.E                                                                            |
| <a href="#">1882</a>  | 599.5156        | 1197.0167        | 1196.7241        | 0.2926         | 1        | 8         | 24             | 6        | K.EQAILVAVAKR.T                                                                          |
| <a href="#">2033</a>  | 613.6811        | 1225.3477        | 1224.6060        | 0.7417         | 0        | 23        | 0.7            | 2        | M.TGLDMETIFAK.I                                                                          |
| <a href="#">4777</a>  | <b>769.3351</b> | <b>1536.6557</b> | <b>1534.7814</b> | <b>1.8743</b>  | <b>0</b> | <b>14</b> | <b>5.7</b>     | <b>1</b> | <b>K.VLMVDIGGGFGQSK.A <a href="#">4744</a> <a href="#">4770</a> <a href="#">4784</a></b> |
| <a href="#">8760</a>  | 632.3142        | 1893.9207        | 1890.9986        | 2.9221         | 1        | 2         | 77             | 9        | K.VLMVDIGGGFGQSKALR.A                                                                    |
| <a href="#">9813</a>  | <b>675.0902</b> | <b>2022.2487</b> | <b>2020.9175</b> | <b>1.3312</b>  | <b>0</b> | <b>54</b> | <b>0.00056</b> | <b>1</b> | <b>K.AFGSDLTMFEWMPQHPK.H <a href="#">9804</a> <a href="#">9815</a></b>                   |
| <a href="#">10446</a> | 697.8545        | 2090.5417        | 2090.1306        | 0.4111         | 2        | 6         | 32             | 6        | K.VLMVDIGGGFGQSKALRAK.F                                                                  |
| <a href="#">11190</a> | <b>731.6762</b> | <b>2192.0067</b> | <b>2190.1143</b> | <b>1.8924</b>  | <b>1</b> | <b>2</b>  | <b>83</b>      | <b>6</b> | <b>K.FPAPDKVLMVDIGGGFGQSK.A</b>                                                          |
| <a href="#">11668</a> | 754.8792        | 2261.6157        | 2263.0864        | -1.4707        | 2        | 2         | 78             | 2        | -.MTGLDMETIFAKIKDEYAR.T <a href="#">11665</a>                                            |
| <a href="#">13685</a> | <b>849.3169</b> | <b>2544.9287</b> | <b>2546.3315</b> | <b>-1.4028</b> | <b>2</b> | <b>7</b>  | <b>23</b>      | <b>1</b> | <b>K.FPAPDKVLMVDIGGGFGQSKALR.A <a href="#">13683</a></b>                                 |
| <a href="#">14467</a> | 895.1245        | 2682.3517        | 2683.2687        | -0.9170        | 1        | 6         | 27             | 1        | R.AEWDDLMEQAGLEIIQSKVYDSK.E                                                              |
| <a href="#">15011</a> | 938.8859        | 2813.6357        | 2814.2604        | -0.6247        | 1        | 2         | 70             | 2        | K.DCVFQKAFGSDLTMFEWMPQHPK.H                                                              |

Proteins matching the same set of peptides:

[gi|220694813|gb|EED51157.1](#) Mass: 43304 Score: 92 Queries matched: 19

af10/ omtB/ dmtA/ O-methyltransferase B [Aspergillus flavus NRRL3357]

280. [gi|220699574|gb|EED55913.1](#) Mass: 139048 Score: 91 Queries matched: 34 emPAI: 0.07

eukaryotic translation initiation factor subunit, putative [Aspergillus flavus NRRL3357]

| Query                | Observed        | Mr(expt)         | Mr(calc)         | Delta         | Miss     | Score      | Expect         | Rank     | Peptide                                                           |
|----------------------|-----------------|------------------|------------------|---------------|----------|------------|----------------|----------|-------------------------------------------------------------------|
| <a href="#">2074</a> | <b>617.2476</b> | <b>1232.4807</b> | <b>1231.6044</b> | <b>0.8763</b> | <b>0</b> | <b>39</b>  | <b>0.022</b>   | <b>2</b> | <b>R.SSLAEEALEAGR.I <a href="#">2067</a></b>                      |
| <a href="#">2081</a> | 617.7111        | 1233.4077        | 1231.6772        | 1.7306        | 2        | 2          | 1e+02          | 10       | R.AAKAVETASKEK.S                                                  |
| <a href="#">2266</a> | <b>629.7576</b> | <b>1257.5007</b> | <b>1256.7493</b> | <b>0.7515</b> | <b>0</b> | <b>54</b>  | <b>0.00072</b> | <b>1</b> | <b>R.IVQSIIVPGIFK.Q <a href="#">2264</a></b>                      |
| <a href="#">2769</a> | 657.5946        | 1313.1747        | 1313.6808        | -0.5061       | 2        | 4          | 63             | 10       | K.ESRMHVIRMR.E                                                    |
| <a href="#">3188</a> | 679.8726        | 1357.7307        | 1356.7613        | 0.9695        | 1        | 2          | 98             | 8        | K.VTPTTLRAEIEK.H                                                  |
| <a href="#">3566</a> | 698.7346        | 1395.4547        | 1394.7591        | 0.6956        | 2        | 5          | 45             | 8        | R.YLGKLAQMSKEK.G <a href="#">3564</a>                             |
| <a href="#">3689</a> | <b>707.5736</b> | <b>1413.1327</b> | <b>1410.7540</b> | <b>2.3787</b> | <b>2</b> | <b>(5)</b> | <b>48</b>      | <b>2</b> | <b>R.YLGKLAQMSKEK.G <a href="#">3682</a> <a href="#">3688</a></b> |
| <a href="#">3702</a> | 708.2001        | 1414.3857        | 1414.7052        | -0.3195       | 1        | 2          | 1.1e+02        | 7        | K.VPATNGASQEEGKK.K                                                |



|                       |           |           |           |         |   |    |         |    |                                                                                         |
|-----------------------|-----------|-----------|-----------|---------|---|----|---------|----|-----------------------------------------------------------------------------------------|
| <a href="#">5717</a>  | 810.8731  | 1619.7317 | 1616.8297 | 2.9020  | 0 | 6  | 38      | 1  | R.INDFVELSEVPDLK.A <a href="#">5708</a>                                                 |
| <a href="#">5743</a>  | 541.5559  | 1621.6457 | 1619.8089 | 1.8368  | 2 | 3  | 69      | 5  | R.HKMSQYVKAEVER.R                                                                       |
| <a href="#">6634</a>  | 563.3452  | 1687.0137 | 1687.9120 | -0.8982 | 1 | 7  | 29      | 6  | K.TALVYIKHAMDLWK.I                                                                      |
| <a href="#">6755</a>  | 566.7992  | 1697.3757 | 1697.9749 | -0.5992 | 0 | 10 | 14      | 4  | R.LDALTL <del>LL</del> VQEM <del>IAR</del> .A <a href="#">6758</a> <a href="#">6766</a> |
| <a href="#">6778</a>  | 850.6916  | 1699.3687 | 1698.8618 | 0.5070  | 0 | 2  | 1e+02   | 4  | K.DVVATHPDFV <del>PV</del> FEK.L                                                        |
| <a href="#">8803</a>  | 633.9932  | 1898.9577 | 1897.8918 | 1.0659  | 1 | 8  | 24      | 5  | K.QREPGEHQIDYGGVEGK.D <a href="#">8802</a>                                              |
| <a href="#">8935</a>  | 638.7509  | 1913.2307 | 1910.9697 | 2.2610  | 1 | 2  | 80      | 3  | K.SQLPAKV <del>PAT</del> NGASQEEGK.K <a href="#">8928</a>                               |
| <a href="#">9645</a>  | 667.8239  | 2000.4497 | 1998.1295 | 2.3202  | 1 | 5  | 42      | 9  | K.GARLDALTL <del>LL</del> VQEM <del>IAR</del> .A                                        |
| <a href="#">9749</a>  | 672.3232  | 2013.9477 | 2011.0334 | 2.9143  | 2 | 1  | 1.1e+02 | 7  | R.HDLEGSVETKGL <del>L</del> GT <del>DGRK</del> .Y                                       |
| <a href="#">11149</a> | 730.6855  | 2189.0347 | 2190.0950 | -1.0603 | 1 | 1  | 1.1e+02 | 10 | R.SSLAEEALEAGRISL <del>M</del> Q <del>NQK</del> .Q                                      |
| <a href="#">12263</a> | 783.1652  | 2346.4737 | 2344.3300 | 2.1437  | 2 | 7  | 23      | 3  | K.GARLDALTL <del>LL</del> VQEM <del>IAR</del> AFK.H <a href="#">12260</a>               |
| <a href="#">13139</a> | 825.2739  | 2472.7997 | 2470.4047 | 2.3951  | 0 | 15 | 3.7     | 1  | R.AASPEKPAVSIVPDDIVNIVPLVK.D                                                            |
| <a href="#">14905</a> | 927.7855  | 2780.3347 | 2777.3993 | 2.9355  | 0 | 4  | 44      | 2  | K.IIYGPNHPDSIT <del>TM</del> NAAVMLQHLK.Q                                               |
| <a href="#">15477</a> | 1005.9342 | 3014.7807 | 3014.6739 | 0.1069  | 2 | 0  | 95      | 10 | R.LDALTL <del>LL</del> VQEM <del>IAR</del> AFKHIANSYL <del>R</del> .N                   |
| <a href="#">16357</a> | 1151.8262 | 3452.4567 | 3449.6959 | 2.7608  | 1 | 1  | 75      | 7  | R.SKVMPELIQDLHDGDVGF <del>PM</del> DGQSL <del>S</del> QLLHK.R                           |

281. [gi|220696542|gb|EED52884.1|](#) Mass: 30502 Score: 90 Queries matched: 13 emPAI: 0.23

NADH-ubiquinone dehydrogenase 24 kDa subunit, putative [Aspergillus flavus NRRL3357]

| Query                 | Observed | Mr(expt)  | Mr(calc)  | Delta   | Miss | Score | Expect  | Rank | Peptide                                                          |
|-----------------------|----------|-----------|-----------|---------|------|-------|---------|------|------------------------------------------------------------------|
| <a href="#">323</a>   | 843.6510 | 842.6437  | 842.5113  | 0.1324  | 0    | 11    | 14      | 9    | R.LIDEILK.R                                                      |
| <a href="#">2510</a>  | 642.6346 | 1283.2547 | 1282.7067 | 0.5480  | 0    | 56    | 0.00043 | 1    | K.AAVMPLLDLGQR.Q <a href="#">2504</a>                            |
| <a href="#">2754</a>  | 656.6116 | 1311.2087 | 1309.6813 | 1.5275  | 0    | 6     | 35      | 2    | K.TVQIPAPGPM <del>SGR</del> .N                                   |
| <a href="#">3362</a>  | 458.6185 | 1372.8337 | 1374.6060 | -1.7723 | 0    | 2     | 1.1e+02 | 8    | K.NPVWDPE <del>TMMR</del> .K                                     |
| <a href="#">3820</a>  | 477.3662 | 1429.0767 | 1426.7966 | 2.2801  | 1    | 17    | 3       | 1    | K.KAAVMPLLDLGQR.Q                                                |
| <a href="#">5187</a>  | 526.5882 | 1576.7427 | 1577.8501 | -1.1073 | 2    | 11    | 12      | 1    | -. <del>MA</del> S <del>K</del> FFPAVPRVGR.Q                     |
| <a href="#">6670</a>  | 845.9886 | 1689.9627 | 1690.8097 | -0.8470 | 0    | 3     | 71      | 1    | R.QHGFTSISVMNEVAR.L                                              |
| <a href="#">8343</a>  | 618.0112 | 1851.0117 | 1851.0057 | 0.0061  | 2    | (5)   | 43      | 7    | K.FFPAVPRVGRQFFQR.A <a href="#">8344</a> <a href="#">8352</a>    |
| <a href="#">11566</a> | 749.7335 | 2246.1787 | 2245.0876 | 1.0912  | 0    | 38    | 0.022   | 1    | R.NKPTNNPSIP <del>TF</del> FNEQ <del>NQR</del> .L                |
| <a href="#">14248</a> | 885.4742 | 2653.4007 | 2655.2535 | -1.8528 | 1    | 2     | 71      | 5    | R.LLEMP <del>PM</del> RVYEVATFY <del>TM</del> Y <del>NR</del> .E |

282. [gi|220692216|gb|EED48563.1|](#) Mass: 25174 Score: 90 Queries matched: 5 emPAI: 0.13

60S acidic ribosomal protein P1 [Aspergillus flavus NRRL3357]

| Query                 | Observed  | Mr(expt)  | Mr(calc)  | Delta   | Miss | Score | Expect  | Rank | Peptide                                                       |
|-----------------------|-----------|-----------|-----------|---------|------|-------|---------|------|---------------------------------------------------------------|
| <a href="#">6079</a>  | 824.7671  | 1647.5197 | 1645.8716 | 1.6482  | 0    | 59    | 0.0002  | 1    | K.VQEV <del>EPI</del> WTSIFAK.A <a href="#">6078</a>          |
| <a href="#">12370</a> | 790.1669  | 2367.4787 | 2364.9881 | 2.4906  | 0    | 2     | 86      | 3    | R.FACMMG <del>SMT</del> GTGTDDAMIPAIR.L                       |
| <a href="#">14709</a> | 909.7349  | 2726.1827 | 2727.2983 | -1.1155 | 0    | 0     | 1.1e+02 | 10   | -. <del>M</del> STAELACSYAALILADDGIEV <del>TADK</del> .L      |
| <a href="#">15905</a> | 1070.7539 | 3209.2397 | 3210.4236 | -1.1839 | 2    | 3     | 53      | 1    | R.TKTS <del>GGT</del> GRFACMMG <del>SMT</del> GTGTDDAMIPAIR.L |

283. [gi|220701302|gb|EED57640.1|](#) Mass: 61175 Score: 89 Queries matched: 17 emPAI: 0.05

glutathione oxidoreductase Glr1, putative [Aspergillus flavus NRRL3357]

| Query                 | Observed  | Mr(expt)  | Mr(calc)  | Delta   | Miss | Score | Expect  | Rank | Peptide                                                    |
|-----------------------|-----------|-----------|-----------|---------|------|-------|---------|------|------------------------------------------------------------|
| <a href="#">431</a>   | 874.6110  | 873.6037  | 873.4920  | 0.1118  | 0    | 10    | 21      | 1    | K.TLIVESGR.S                                               |
| <a href="#">2046</a>  | 614.5906  | 1227.1667 | 1227.6935 | -0.5268 | 2    | 9     | 20      | 4    | K.EVQLVRDGGK.D                                             |
| <a href="#">2952</a>  | 667.5176  | 1333.0207 | 1333.6119 | -0.5912 | 0    | 9     | 21      | 6    | R.SGGTCVNVGCVPK.K                                          |
| <a href="#">4537</a>  | 756.7096  | 1511.4047 | 1511.7112 | -0.3065 | 1    | (8)   | 22      | 3    | K.FDPMIQKTMTER.Y <a href="#">4540</a>                      |
| <a href="#">4696</a>  | 764.7591  | 1527.5037 | 1527.7061 | -0.2024 | 1    | 10    | 17      | 4    | K.FDPMIQKTMTER.Y <a href="#">4704</a> <a href="#">4712</a> |
| <a href="#">5693</a>  | 809.7286  | 1617.4427 | 1616.8410 | 0.6017  | 0    | 24    | 0.59    | 1    | R.APEVEDLHLDVPGVK.L                                        |
| <a href="#">6606</a>  | 843.7651  | 1685.5157 | 1685.8638 | -0.3480 | 2    | 1     | 1.1e+02 | 1    | R.SYSRSFPVQAFKNR.L                                         |
| <a href="#">6624</a>  | 563.1709  | 1686.4907 | 1687.7803 | -1.2896 | 0    | 2     | 89      | 5    | K.FTAMYDVPPEEK.K                                           |
| <a href="#">11185</a> | 1096.9526 | 2191.8907 | 2189.0933 | 2.7974  | 1    | 3     | 75      | 3    | K.TLIVESGRSGGTCVNVGCVPK.K <a href="#">11173</a>            |
| <a href="#">11991</a> | 769.8235  | 2306.4487 | 2308.2977 | -1.8490 | 0    | 7     | 23      | 1    | K.VVGLHILGLVGEMLQGFVAVK.M                                  |
| <a href="#">14071</a> | 872.6255  | 2614.8547 | 2615.3628 | -0.5081 | 1    | 0     | 1e+02   | 6    | K.LLKLISNDGSEMVEVNEILWAIGR.A                               |
| <a href="#">15299</a> | 976.8859  | 2927.6357 | 2926.4713 | 1.1645  | 0    | 58    | 0.00016 | 1    | K.LSYDNIPTVVFSHPEVGTVGLTEPEAR.E <a href="#">15300</a>      |

284. [gi|220699939|gb|EED56278.1|](#) Mass: 14588 Score: 89 Queries matched: 5 emPAI: 0.23

cytochrome b5, putative [Aspergillus flavus NRRL3357]

| Query                 | Observed | Mr(expt)  | Mr(calc)  | Delta  | Miss | Score | Expect  | Rank | Peptide                                 |
|-----------------------|----------|-----------|-----------|--------|------|-------|---------|------|-----------------------------------------|
| <a href="#">2505</a>  | 642.4211 | 1282.8277 | 1282.7496 | 0.0781 | 0    | 57    | 0.00031 | 1    | R.EILDGLLVGNLK.R <a href="#">2513</a>   |
| <a href="#">4668</a>  | 509.0752 | 1524.2037 | 1522.7052 | 1.4985 | 0    | 12    | 9.2     | 1    | K.EFTTFQEVSGHNTK.K <a href="#">4658</a> |
| <a href="#">10605</a> | 705.2675 | 2112.7807 | 2111.9582 | 0.8225 | 1    | 2     | 74      | 9    | -.MSENKEFTFQEVSGHNTK.K                  |

285. [gi|220697662|gb|EED54003.1|](#) Mass: 45468 Score: 88 Queries matched: 9 emPAI: 0.07

branched-chain amino acid aminotransferase, cytosolic [Aspergillus flavus NRRL3357]

| Query                 | Observed  | Mr(expt)  | Mr(calc)  | Delta   | Miss | Score | Expect  | Rank | Peptide                                        |
|-----------------------|-----------|-----------|-----------|---------|------|-------|---------|------|------------------------------------------------|
| <a href="#">4741</a>  | 767.2471  | 1532.4797 | 1532.7253 | -0.2455 | 1    | 6     | 43      | 2    | K.IRMSEVAEAADEGR.L <a href="#">4749</a>        |
| <a href="#">6466</a>  | 839.0966  | 1676.1787 | 1675.8828 | 0.2960  | 2    | 3     | 75      | 9    | R.LFRPKDNMERLNK.S                              |
| <a href="#">6809</a>  | 851.6676  | 1701.3207 | 1702.7587 | -1.4380 | 0    | 0     | 1.5e+02 | 9    | K.NWIEGIQYGDEDHK.W                             |
| <a href="#">7676</a>  | 892.3161  | 1782.6177 | 1782.9727 | -0.3550 | 0    | 24    | 0.52    | 1    | K.ELVTAPLDGTILEGVTR.D                          |
| <a href="#">8058</a>  | 909.7796  | 1817.5447 | 1816.9935 | 0.5513  | 2    | 4     | 62      | 10   | K.TSSPKELTPAKDLVFGK.T                          |
| <a href="#">8256</a>  | 615.1499  | 1842.4277 | 1842.0462 | 0.3815  | 2    | 6     | 39      | 8    | R.LAGIDPSKLTVTKTSSPK.E                         |
| <a href="#">10270</a> | 1033.8806 | 2065.7467 | 2065.1671 | 0.5797  | 0    | 88    | 2.1e-07 | 1    | R.IALPTVDGEALTQLVGELVK.L <a href="#">10273</a> |

286. [gi|46370637|gb|AAS90104.1|](#) Mass: 47130 Score: 87 Queries matched: 11 emPAI: 0.22

OmtA [Aspergillus flavus]

| Query                | Observed | Mr(expt)  | Mr(calc)  | Delta  | Miss | Score | Expect | Rank | Peptide           |
|----------------------|----------|-----------|-----------|--------|------|-------|--------|------|-------------------|
| <a href="#">3764</a> | 475.3542 | 1423.0407 | 1420.6405 | 2.4002 | 0    | 13    | 7.6    | 2    | K.EWNSLNTMVDGR.L  |
| <a href="#">5076</a> | 783.5086 | 1565.0027 | 1562.7253 | 2.2774 | 0    | 7     | 28     | 1    | K.GLFDYYSTVDEVR.G |

|                       |                           |                           |                           |                         |          |          |           |          |                                               |
|-----------------------|---------------------------|---------------------------|---------------------------|-------------------------|----------|----------|-----------|----------|-----------------------------------------------|
| <a href="#">7334</a>  | 877.2966                  | 1752.5787                 | 1752.8101                 | -0.2314                 | 1        | 1        | 1.2e+02   | 7        | R.STKEWNSLITMVDGR.L                           |
| <a href="#">9615</a>  | <b>999.1591</b>           | <b>1996.3037</b>          | <b>1995.9762</b>          | <b>0.3275</b>           | <b>1</b> | <b>2</b> | <b>85</b> | <b>6</b> | <b>R.ERTPSSTEHAQAWIVR.T</b>                   |
| <a href="#">10289</a> | <a href="#">690.5172</a>  | <a href="#">2068.5297</a> | <a href="#">2066.9585</a> | <a href="#">1.5712</a>  | 0        | 41       | 0.011     | 1        | R.FIFEEVAPDQYAHTDASK.M <a href="#">10286</a>  |
| <a href="#">10520</a> | <a href="#">1051.0501</a> | <a href="#">2100.0857</a> | <a href="#">2100.0595</a> | <a href="#">0.0262</a>  | 0        | 36       | 0.032     | 1        | R.ILLDEMIMPDLAQSQR.F                          |
| <a href="#">10814</a> | <a href="#">715.2352</a>  | <a href="#">2142.6837</a> | <a href="#">2140.0657</a> | <a href="#">2.6181</a>  | 1        | 2        | 79        | 1        | R.FMNQIDMTVVLTNGKER.S                         |
| <a href="#">11043</a> | <a href="#">725.0985</a>  | <a href="#">2172.2737</a> | <a href="#">2171.1051</a> | <a href="#">1.1686</a>  | 0        | 51       | 0.00098   | 1        | K.GKPPSWNVSPFSLAFDPTK.G <a href="#">11051</a> |
| <a href="#">12437</a> | <a href="#">792.6655</a>  | <a href="#">2374.9747</a> | <a href="#">2375.1824</a> | <a href="#">-0.2077</a> | 1        | 2        | 79        | 6        | K.SRILLDEMIMPDLAQSQR.F                        |

287. [gi|46370555|gb|AAS90087.1|](#) Mass: 47027 Score: 87 Queries matched: 11 emPAI: 0.23

OmtA [Aspergillus flavus]

| Query                 | Observed                  | Mr(expt)                  | Mr(calc)                  | Delta                   | Miss | Score | Expect  | Rank | Peptide                                       |
|-----------------------|---------------------------|---------------------------|---------------------------|-------------------------|------|-------|---------|------|-----------------------------------------------|
| <a href="#">3889</a>  | 719.1501                  | 1436.2857                 | 1435.6766                 | 0.6092                  | 0    | 3     | 78      | 6    | K.EWNSLITMVDGR.L                              |
| <a href="#">5076</a>  | <b>783.5086</b>           | <b>1565.0027</b>          | <b>1562.7253</b>          | <b>2.2774</b>           | 0    | 7     | 28      | 1    | <b>K.GLFDYYSTVDEVR.G</b>                      |
| <a href="#">9615</a>  | 999.1591                  | 1996.3037                 | 1995.9762                 | 0.3275                  | 1    | 2     | 85      | 6    | R.ERTPSSTEHAQAWIVR.T                          |
| <a href="#">10289</a> | <a href="#">690.5172</a>  | <a href="#">2068.5297</a> | <a href="#">2066.9585</a> | <a href="#">1.5712</a>  | 0    | 41    | 0.011   | 1    | R.FIFEEVAPDQYAHTDASK.M <a href="#">10286</a>  |
| <a href="#">10520</a> | <a href="#">1051.0501</a> | <a href="#">2100.0857</a> | <a href="#">2100.0595</a> | <a href="#">0.0262</a>  | 0    | 36    | 0.032   | 1    | R.ILLDEMIMPDLAQSQR.F                          |
| <a href="#">10814</a> | <a href="#">715.2352</a>  | <a href="#">2142.6837</a> | <a href="#">2140.0657</a> | <a href="#">2.6181</a>  | 1    | 2     | 79      | 1    | R.FMNQIDMTVVLTNGKER.S                         |
| <a href="#">11043</a> | <a href="#">725.0985</a>  | <a href="#">2172.2737</a> | <a href="#">2171.1051</a> | <a href="#">1.1686</a>  | 0    | 51    | 0.00098 | 1    | K.GKPPSWNVSPFSLAFDPTK.G <a href="#">11051</a> |
| <a href="#">12437</a> | <a href="#">792.6655</a>  | <a href="#">2374.9747</a> | <a href="#">2375.1824</a> | <a href="#">-0.2077</a> | 1    | 2     | 79      | 6    | K.SRILLDEMIMPDLAQSQR.F                        |
| <a href="#">12881</a> | 813.2212                  | 2436.6417                 | 2436.2505                 | 0.3912                  | 2    | 2     | 83      | 9    | R.FMNQIDMTVVLTNGKERSPK.E                      |

288. [gi|413844|gb|AAA32698.1|](#) Mass: 47089 Score: 87 Queries matched: 10 emPAI: 0.23

O-methyltransferase [Aspergillus flavus]

| Query                 | Observed                  | Mr(expt)                  | Mr(calc)                  | Delta                   | Miss | Score | Expect  | Rank | Peptide                                       |
|-----------------------|---------------------------|---------------------------|---------------------------|-------------------------|------|-------|---------|------|-----------------------------------------------|
| <a href="#">5076</a>  | <b>783.5086</b>           | <b>1565.0027</b>          | <b>1562.7253</b>          | <b>2.2774</b>           | 0    | 7     | 28      | 1    | <b>K.GLFDYYSTVDEVR.G</b>                      |
| <a href="#">7823</a>  | <b>599.3252</b>           | <b>1794.9537</b>          | <b>1792.8778</b>          | <b>2.0760</b>           | 1    | 5     | 46      | 3    | <b>R.STKEWNSLITMVDNR.L</b>                    |
| <a href="#">7985</a>  | 906.8531                  | 1811.6917                 | 1808.8727                 | 2.8190                  | 1    | (0)   | 1.3e+02 | 7    | R.STKEWNSLITMVDNR.L                           |
| <a href="#">10289</a> | <a href="#">690.5172</a>  | <a href="#">2068.5297</a> | <a href="#">2066.9585</a> | <a href="#">1.5712</a>  | 0    | 41    | 0.011   | 1    | R.FIFEEVAPDQYAHTDASK.M <a href="#">10286</a>  |
| <a href="#">10520</a> | <a href="#">1051.0501</a> | <a href="#">2100.0857</a> | <a href="#">2100.0595</a> | <a href="#">0.0262</a>  | 0    | 36    | 0.032   | 1    | R.ILLDEMIMPDLAQSQR.F                          |
| <a href="#">10814</a> | <a href="#">715.2352</a>  | <a href="#">2142.6837</a> | <a href="#">2140.0657</a> | <a href="#">2.6181</a>  | 1    | 2     | 79      | 1    | R.FMNQIDMTVVLTNGKER.S                         |
| <a href="#">11043</a> | <a href="#">725.0985</a>  | <a href="#">2172.2737</a> | <a href="#">2171.1051</a> | <a href="#">1.1686</a>  | 0    | 51    | 0.00098 | 1    | K.GKPPSWNVSPFSLAFDPTK.G <a href="#">11051</a> |
| <a href="#">12437</a> | <a href="#">792.6655</a>  | <a href="#">2374.9747</a> | <a href="#">2375.1824</a> | <a href="#">-0.2077</a> | 1    | 2     | 79      | 6    | K.SRILLDEMIMPDLAQSQR.F                        |

**Proteins matching the same set of peptides:**

[gi|2498701|sp|P55790.1|OMTA\\_ASPFL](#) Mass: 47089 Score: 87 Queries matched: 10

RecName: Full=Sterigmatocystin 8-O-methyltransferase; Flags: Precursor

[gi|220694812|gb|EED51156.1|](#) Mass: 47089 Score: 87 Queries matched: 10

aflP/ omtA/ omt-1/ O-methyltransferase A [Aspergillus flavus NRRL3357]

289. [gi|220700882|gb|EED57220.1|](#) Mass: 119864 Score: 86 Queries matched: 26 emPAI: 0.06

valyl-tRNA synthetase [Aspergillus flavus NRRL3357]

| Query                 | Observed  | Mr(expt)  | Mr(calc)  | Delta   | Miss | Score | Expect  | Rank | Peptide                                           |
|-----------------------|-----------|-----------|-----------|---------|------|-------|---------|------|---------------------------------------------------|
| <a href="#">186</a>   | 773.9730  | 772.9657  | 773.4647  | -0.4989 | 2    | 14    | 8.9     | 2    | K.KEKIEK.E                                        |
| <a href="#">277</a>   | 822.9160  | 821.9087  | 821.4283  | 0.4804  | 0    | 1     | 1.4e+02 | 6    | K.ENGLYVK.W                                       |
| <a href="#">531</a>   | 455.4256  | 908.8367  | 909.4378  | -0.6011 | 0    | 12    | 10      | 8    | K.NGGIFAGMK.R <a href="#">529</a>                 |
| <a href="#">578</a>   | 459.6906  | 917.3667  | 916.5131  | 0.8537  | 0    | 9     | 29      | 3    | K.LTGQVPFR.E                                      |
| <a href="#">882</a>   | 500.7736  | 999.5327  | 998.4781  | 1.0546  | 0    | 13    | 8.3     | 2    | R.NQNADAAAPK.V <a href="#">883</a>                |
| <a href="#">918</a>   | 505.0436  | 1008.0727 | 1009.4618 | -1.3890 | 0    | 4     | 58      | 1    | R.VGGSFDWSR.E                                     |
| <a href="#">1011</a>  | 517.7266  | 1033.4387 | 1033.5477 | -0.1090 | 2    | 11    | 15      | 9    | R.EMEEKKLLK.D                                     |
| <a href="#">1163</a>  | 532.6611  | 1063.3077 | 1062.5709 | 0.7368  | 2    | 8     | 30      | 8    | R.EFEKLRLE.-                                      |
| <a href="#">1370</a>  | 551.7526  | 1101.4907 | 1100.5462 | 0.9446  | 0    | 23    | 0.93    | 2    | K.EINEALEQR.E                                     |
| <a href="#">1457</a>  | 559.6151  | 1117.2157 | 1115.5876 | 1.6281  | 1    | 0     | 1.8e+02 | 7    | K.FAKHPFVDR.L                                     |
| <a href="#">2406</a>  | 1273.6240 | 1272.6167 | 1271.6332 | 0.9835  | 1    | 0     | 1.7e+02 | 10   | R.FCNKIYQATK.Y                                    |
| <a href="#">2546</a>  | 644.4871  | 1286.9597 | 1284.6925 | 2.2672  | 0    | 21    | 1.4     | 1    | K.GDIVIKPESAEK.S                                  |
| <a href="#">3008</a>  | 670.4551  | 1338.8957 | 1338.6456 | 0.2501  | 0    | 29    | 0.17    | 1    | R.DLFKPEFGSDGK.V                                  |
| <a href="#">5731</a>  | 541.2385  | 1620.6937 | 1619.8281 | 0.8657  | 2    | 3     | 71      | 8    | K.NALRRVGGSFDSR.E                                 |
| <a href="#">7788</a>  | 896.6576  | 1791.3007 | 1789.9210 | 1.3797  | 1    | 0     | 1.3e+02 | 6    | K.TKGDIIIQTYDATSHK.T                              |
| <a href="#">8807</a>  | 634.1969  | 1899.5687 | 1897.0316 | 2.5372  | 2    | 0     | 1.3e+02 | 1    | R.LPRRPNDNTISIMKAR.Y                              |
| <a href="#">9278</a>  | 978.6446  | 1955.2747 | 1953.9571 | 1.3176  | 0    | 1     | 1.1e+02 | 7    | K.AEFNDVEAETAYELILK.T                             |
| <a href="#">9741</a>  | 672.0649  | 2013.1727 | 2015.0588 | -1.8861 | 2    | 4     | 56      | 4    | R.ESLSERWILHKFNAAK.E                              |
| <a href="#">10507</a> | 1050.3876 | 2098.7607 | 2098.0041 | 0.7566  | 0    | 82    | 9.6e-07 | 1    | R.EAFTMDPNLSAAVTETFVR.L                           |
| <a href="#">11351</a> | 738.6195  | 2212.8367 | 2211.1106 | 1.7261  | 2    | 4     | 56      | 3    | R.RPNDNTISIMKARYPEYK.A <a href="#">11329</a>      |
| <a href="#">13637</a> | 846.2689  | 2535.7847 | 2534.3050 | 1.4797  | 0    | 20    | 1.3     | 1    | K.SLGNVIDPIDVMEGIQLQTLHDK.L <a href="#">13641</a> |
| <a href="#">15253</a> | 967.4352  | 2899.2837 | 2896.4674 | 2.8163  | 1    | 3     | 57      | 9    | K.MSKSLGNVIDPIDVMEGIQLQTLHDK.L                    |

290. [gi|220694687|gb|EED51031.1|](#) Mass: 60098 Score: 83 Queries matched: 28 emPAI: 0.17

GMP synthase [Aspergillus flavus NRRL3357]

| Query                 | Observed  | Mr(expt)  | Mr(calc)  | Delta   | Miss | Score | Expect  | Rank | Peptide                                                                                                            |
|-----------------------|-----------|-----------|-----------|---------|------|-------|---------|------|--------------------------------------------------------------------------------------------------------------------|
| <a href="#">441</a>   | 878.6630  | 877.6557  | 878.4168  | -0.7610 | 0    | 10    | 19      | 7    | R.MTEGQGLK.L <a href="#">439</a>                                                                                   |
| <a href="#">968</a>   | 511.5406  | 1021.0667 | 1018.5229 | 2.5438  | 1    | 8     | 27      | 4    | K.RMTEGQGLK.L <a href="#">971</a>                                                                                  |
| <a href="#">1148</a>  | 530.6766  | 1059.3387 | 1058.5621 | 0.7766  | 0    | 21    | 1.7     | 3    | K.THHNVGGLPK.R <a href="#">1145</a>                                                                                |
| <a href="#">1478</a>  | 374.5692  | 1120.6857 | 1119.6288 | 1.0570  | 1    | 8     | 27      | 8    | R.EYGLAQLKAK.K                                                                                                     |
| <a href="#">1992</a>  | 609.5841  | 1217.1537 | 1217.6227 | -0.4689 | 0    | 18    | 3.2     | 2    | K.ADHIFISMIR.E                                                                                                     |
| <a href="#">2163</a>  | 623.5971  | 1245.1797 | 1244.6513 | 0.5284  | 0    | 53    | 0.00092 | 1    | K.IGQAFALDPSR.A <a href="#">2164</a>                                                                               |
| <a href="#">2801</a>  | 659.2111  | 1316.4077 | 1315.6377 | 0.7701  | 0    | 4     | 63      | 8    | R.QLGIAHEMVMR.H                                                                                                    |
| <a href="#">5191</a>  | 789.4496  | 1576.8847 | 1574.8199 | 2.0648  | 1    | 1     | 1.1e+02 | 4    | R.VSTRIVNEVSGVCR.V                                                                                                 |
| <a href="#">9460</a>  | 660.6265  | 1978.8577 | 1977.9982 | 0.8595  | 1    | 2     | 84      | 8    | K.ADHIFISMIREAGLYDK.I                                                                                              |
| <a href="#">9785</a>  | 1010.3276 | 2018.6407 | 2018.0255 | 0.6152  | 1    | 11    | 11      | 1    | K.IGQAFALDPSRAVGMGDK.R <a href="#">9775</a>                                                                        |
| <a href="#">11324</a> | 738.0472  | 2211.1197 | 2210.2271 | 0.8926  | 1    | 18    | 2.2     | 1    | R.KLVGPTGQVLGAVSGVDSTVAAK.L <a href="#">11327</a> <a href="#">11337</a> <a href="#">11338</a> <a href="#">1134</a> |

[11525](#) 747.2189 2238.6347 2240.1154 -1.4807 2 1 1.2e+02 5 K.DEVRDLGRQLGIAHEMVMR.H  
[13944](#) **864.5205** **2590.5397** **2588.2257** **2.3140** 0 (33) 0.065 1 **R.AVETTD~~F~~MTAIAYPFEHEFLTR.V** [13935](#)  
[13996](#) **869.6775** **2606.0107** **2604.2206** **1.7901** 0 41 0.0084 1 **R.AVETTD~~F~~MTAIAYPFEHEFLTR.V** [13988](#)

291. [gi|220692642|gb|EED48988.1|](#) Mass: 79847 Score: 83 Queries matched: 16 emPAI: 0.13

mycelial catalase Cat1 [Aspergillus flavus NRRL3357]

| Query                 | Observed         | Mr(expt)         | Mr(calc)         | Delta          | Miss | Score     | Expect         | Rank | Peptide                                        |
|-----------------------|------------------|------------------|------------------|----------------|------|-----------|----------------|------|------------------------------------------------|
| <a href="#">345</a>   | 848.5660         | 847.5587         | 845.4355         | 2.1232         | 0    | 4         | 83             | 7    | K.NAGIQTSR.D                                   |
| <a href="#">598</a>   | 463.9856         | 925.9567         | 925.5022         | 0.4546         | 1    | 6         | 37             | 4    | R.TFKFLDR.F                                    |
| <a href="#">2557</a>  | 645.2321         | 1288.4497        | 1286.7122        | 1.7375         | 0    | 3         | 92             | 5    | K.IVPEEYVPITK.L                                |
| <a href="#">2722</a>  | <b>654.6611</b>  | <b>1307.3077</b> | <b>1306.6921</b> | <b>0.6156</b>  | 0    | <b>69</b> | <b>2e-05</b>   | 1    | <b>R.GPTLLEDFIFR.Q</b>                         |
| <a href="#">3757</a>  | 474.7729         | 1421.2967        | 1421.7878        | -0.4911        | 2    | 9         | 22             | 7    | K.TTDVGTFGQKLKK.L                              |
| <a href="#">4197</a>  | <b>491.3629</b>  | <b>1471.0667</b> | <b>1469.8507</b> | <b>1.2160</b>  | 2    | <b>9</b>  | <b>21</b>      | 5    | <b>K.LVKFHWKSLQK.A</b>                         |
| <a href="#">4203</a>  | 736.9381         | 1471.8617        | 1472.8351        | -0.9734        | 0    | 3         | 81             | 5    | R.FGKPVGAVGSAATALK.N                           |
| <a href="#">5289</a>  | <b>529.3735</b>  | <b>1585.0987</b> | <b>1584.9127</b> | <b>0.1860</b>  | 1    | <b>5</b>  | <b>50</b>      | 1    | <b>K.IVPEEYVPITKLGK.M</b>                      |
| <a href="#">5520</a>  | <b>803.2166</b>  | <b>1604.4187</b> | <b>1603.7631</b> | <b>0.6556</b>  | 0    | <b>25</b> | <b>0.51</b>    | 1    | <b>R.AVSPSFEDVWSQPR.L</b> <a href="#">5545</a> |
| <a href="#">5993</a>  | 822.5946         | 1643.1747        | 1640.8536        | 2.3211         | 1    | 1         | 1.1e+02        | 9    | R.SLRHVDGFGIHTFR.F                             |
| <a href="#">9319</a>  | <b>654.6609</b>  | <b>1960.9607</b> | <b>1960.0894</b> | <b>0.8713</b>  | 2    | <b>31</b> | <b>0.1</b>     | 1    | <b>R.GPTLLEDFIFRQKIQR.F</b>                    |
| <a href="#">10366</a> | 694.1942         | 2079.5607        | 2078.0102        | 1.5505         | 1    | 1         | 1.1e+02        | 7    | K.SLQKASMVWEEAQVSGK.N                          |
| <a href="#">12347</a> | <b>787.6492</b>  | <b>2359.9257</b> | <b>2361.1423</b> | <b>-1.2166</b> | 0    | 0         | <b>1.2e+02</b> | 7    | <b>R.DGAGQMFIFLNPAYSPNTLNK.G</b>               |
| <a href="#">15004</a> | <b>937.8055</b>  | <b>2810.3947</b> | <b>2807.4422</b> | <b>2.9526</b>  | 2    | <b>3</b>  | <b>56</b>      | 1    | <b>M.RALSLASVIGIASAACPYMTGELERR.D</b>          |
| <a href="#">16278</a> | <b>1136.7689</b> | <b>3407.2847</b> | <b>3404.5799</b> | <b>2.7048</b>  | 1    | <b>2</b>  | <b>58</b>      | 1    | <b>R.YPEWELGVQIMDEEDQLKFGFDLFDPTK.I</b>        |

292. [gi|220694061|gb|EED50405.1|](#) Mass: 72458 Score: 82 Queries matched: 10 emPAI: 0.09

oxidoreductase, putative [Aspergillus flavus NRRL3357]

| Query                 | Observed         | Mr(expt)         | Mr(calc)         | Delta          | Miss | Score     | Expect         | Rank | Peptide                       |
|-----------------------|------------------|------------------|------------------|----------------|------|-----------|----------------|------|-------------------------------|
| <a href="#">1347</a>  | <b>549.1856</b>  | <b>1096.3567</b> | <b>1097.5287</b> | <b>-1.1720</b> | 1    | <b>8</b>  | <b>25</b>      | 1    | <b>K.LRDAMYSAR.F</b>          |
| <a href="#">1715</a>  | <b>388.3559</b>  | <b>1162.0457</b> | <b>1160.5309</b> | <b>1.5148</b>  | 0    | <b>15</b> | <b>5</b>       | 2    | <b>R.ESLGGSGQPDSK.R</b>       |
| <a href="#">2810</a>  | 659.6476         | 1317.2807        | 1316.6320        | 0.6487         | 1    | 6         | 42             | 5    | R.ESLGGSGQPDSKR.R             |
| <a href="#">4250</a>  | 738.6541         | 1475.2937        | 1472.7332        | 2.5606         | 2    | 0         | 1.5e+02        | 7    | R.ESLGGSGQPDSKRR.A            |
| <a href="#">5233</a>  | <b>527.8055</b>  | <b>1580.3947</b> | <b>1579.9198</b> | <b>0.4749</b>  | 0    | <b>9</b>  | <b>19</b>      | 3    | <b>K.HGVIHPLIEPSLLR.A</b>     |
| <a href="#">5240</a>  | <b>791.5671</b>  | <b>1581.1197</b> | <b>1579.7631</b> | <b>1.3567</b>  | 1    | <b>43</b> | <b>0.0073</b>  | 1    | <b>R.FRDLGLFEPSEQQK.Y</b>     |
| <a href="#">8250</a>  | <b>614.8005</b>  | <b>1841.3797</b> | <b>1842.9588</b> | <b>-1.5791</b> | 2    | <b>2</b>  | <b>96</b>      | 3    | <b>R.FREYLSSVTGSGKLSGR.K</b>  |
| <a href="#">8929</a>  | <b>638.3585</b>  | <b>1912.0537</b> | <b>1912.8551</b> | <b>-0.8014</b> | 1    | <b>3</b>  | <b>63</b>      | 8    | <b>R.RGQDYTLASGYDGEEPR.L</b>  |
| <a href="#">11423</a> | 1112.8391        | 2223.6637        | 2224.0582        | -0.3945        | 2    | 0         | 1.2e+02        | 9    | R.DAMYSARFREYLSSVTGSGK.L      |
| <a href="#">12800</a> | <b>1214.2596</b> | <b>2426.5047</b> | <b>2425.8524</b> | <b>0.6523</b>  | 0    | <b>67</b> | <b>2.3e-05</b> | 1    | <b>K.EADEEEEEDEEGENGESK.K</b> |

293. [gi|220689997|gb|EED46347.1|](#) Mass: 94438 Score: 82 Queries matched: 37 emPAI: 0.19

plasma membrane H<sup>+</sup>-ATPase Pmal [Aspergillus flavus NRRL3357]

| Query                 | Observed        | Mr(expt)         | Mr(calc)         | Delta          | Miss     | Score     | Expect        | Rank     | Peptide                                                                                                          |
|-----------------------|-----------------|------------------|------------------|----------------|----------|-----------|---------------|----------|------------------------------------------------------------------------------------------------------------------|
| <a href="#">900</a>   | <b>501.8581</b> | <b>1001.7017</b> | <b>1000.5553</b> | <b>1.1464</b>  | <b>0</b> | <b>40</b> | <b>0.021</b>  | <b>1</b> | <b>K.QAADVVASLK.G</b>                                                                                            |
| <a href="#">1379</a>  | 1104.6170       | 1103.6097        | 1102.6056        | 1.0041         | 0        | (14)      | 7.8           | 2        | K.MLTGDALAIK.E                                                                                                   |
| <a href="#">1467</a>  | <b>560.4941</b> | <b>1118.9737</b> | <b>1118.6005</b> | <b>0.3732</b>  | <b>0</b> | <b>40</b> | <b>0.016</b>  | <b>1</b> | <b>K.MLTGDALAIK.E</b>                                                                                            |
| <a href="#">1699</a>  | <b>580.6041</b> | <b>1159.1937</b> | <b>1157.5676</b> | <b>1.6261</b>  | <b>0</b> | <b>47</b> | <b>0.0035</b> | <b>1</b> | <b>R.DGQEQEILAR.E</b> <a href="#">1690</a>                                                                       |
| <a href="#">1840</a>  | 595.1676        | 1188.3207        | 1186.6016        | 1.7191         | 0        | 6         | 46            | 4        | K.IENMLSHLSK.L                                                                                                   |
| <a href="#">2603</a>  | 647.7346        | 1293.4547        | 1292.6547        | 0.8000         | 0        | (2)       | 97            | 5        | K.YQVVEMLQQR.G                                                                                                   |
| <a href="#">2632</a>  | 648.8791        | 1295.7437        | 1296.6417        | -0.8980        | 1        | 6         | 39            | 4        | K.ETCKMLALSTK.V                                                                                                  |
| <a href="#">2739</a>  | 655.5511        | 1309.0877        | 1308.6496        | 0.4381         | 0        | 11        | 12            | 2        | K.YQVVEMLQQR.G <a href="#">2738</a>                                                                              |
| <a href="#">2957</a>  | 667.5881        | 1333.1617        | 1332.7877        | 0.3740         | 2        | 4         | 68            | 7        | K.RGKAYGIVVATAK.Q                                                                                                |
| <a href="#">3067</a>  | <b>673.7396</b> | <b>1345.4647</b> | <b>1345.6303</b> | <b>-0.1655</b> | <b>0</b> | <b>30</b> | <b>0.18</b>   | <b>1</b> | <b>K.ADGFAEVFPEHK.Y</b> <a href="#">3076</a>                                                                     |
| <a href="#">3375</a>  | <b>688.2311</b> | <b>1374.4477</b> | <b>1371.7510</b> | <b>2.6967</b>  | <b>1</b> | <b>3</b>  | <b>94</b>     | <b>1</b> | <b>R.EILARNWITEK.Y</b>                                                                                           |
| <a href="#">5291</a>  | 793.6671        | 1585.3197        | 1585.8134        | -0.4936        | 1        | 8         | 26            | 4        | K.ADTKIENMLSHLSK.L <a href="#">5290</a>                                                                          |
| <a href="#">5445</a>  | 534.2315        | 1599.6727        | 1598.8892        | 0.7835         | 2        | 6         | 39            | 3        | K.AREILARNWITEK.Y                                                                                                |
| <a href="#">5456</a>  | 801.1911        | 1600.3677        | 1601.8083        | -1.4405        | 1        | (2)       | 87            | 3        | K.ADTKIENMLSHLSK.L <a href="#">5503</a>                                                                          |
| <a href="#">5593</a>  | 806.2066        | 1610.3987        | 1609.9403        | 0.4584         | 1        | 27        | 0.29          | 2        | K.NLDPIDKVTILTLR.R <a href="#">5580</a> <a href="#">5597</a>                                                     |
| <a href="#">5917</a>  | 546.4632        | 1636.3677        | 1636.8164        | -0.4487        | 1        | 4         | 56            | 6        | K.MLTGDALAIKETCK.M <a href="#">5922</a>                                                                          |
| <a href="#">7918</a>  | 903.3506        | 1804.6867        | 1804.7219        | -0.0352        | 1        | 3         | 77            | 2        | K.YMADTCYYTTGCKR.G                                                                                               |
| <a href="#">7922</a>  | <b>903.4666</b> | <b>1804.9187</b> | <b>1803.9288</b> | <b>0.9899</b>  | <b>0</b> | <b>28</b> | <b>0.22</b>   | <b>1</b> | <b>K.LTAIESLAGVDILCSDK.T</b> <a href="#">7914</a> <a href="#">7919</a> <a href="#">7921</a> <a href="#">7929</a> |
| <a href="#">8037</a>  | 909.2841        | 1816.5537        | 1816.9353        | -0.3815        | 2        | 1         | 1e+02         | 4        | R.SKADTKIENMLSHLSK.L                                                                                             |
| <a href="#">12599</a> | 800.8872        | 2399.6397        | 2397.2317        | 2.4080         | 2        | 11        | 8.9           | 2        | K.MLTGDALAIKETCKMLALSTK.V <a href="#">12580</a>                                                                  |
| <a href="#">13108</a> | 824.1965        | 2469.5677        | 2470.2638        | -0.6961        | 1        | 0         | 1.2e+02       | 8        | K.IENMLSHLSKLAIEHEVDAHGK.S                                                                                       |
| <a href="#">14390</a> | 1336.4381       | 2670.8617        | 2671.2291        | -0.3674        | 2        | 1         | 91            | 8        | R.YVCAKGAPKAILNMSECSEEEAAK.F <a href="#">14386</a>                                                               |
| <a href="#">15867</a> | 1064.3359       | 3189.9857        | 3187.6603        | 2.3255         | 0        | 1         | 72            | 3        | K.AVMDNIGTSLLVLMFWILAAWIGGFYR.H                                                                                  |

294. [gi|220694335|gb|EED50679.1|](#) Mass: 62329 Score: 82 Queries matched: 5 emPAI: 0.05

MFS monosaccharide transporter, putative [Aspergillus flavus NRRL3357]

| Query                 | Observed        | Mr(expt)         | Mr(calc)         | Delta         | Miss     | Score     | Expect         | Rank     | Peptide                          |
|-----------------------|-----------------|------------------|------------------|---------------|----------|-----------|----------------|----------|----------------------------------|
| <a href="#">786</a>   | 490.2151        | 978.4157         | 977.4786         | 0.9371        | 0        | 16        | 4              | 4        | -.MGVSNLMAR.L                    |
| <a href="#">857</a>   | 497.6781        | 993.3417         | 993.4736         | -0.1318       | 0        | (11)      | 14             | 4        | -.MGVSNLMAR.L                    |
| <a href="#">4549</a>  | 505.4149        | 1513.2227        | 1511.6782        | 1.5445        | 2        | 6         | 41             | 5        | R.CIAQEMKDMKDK.L                 |
| <a href="#">4619</a>  | <b>761.2071</b> | <b>1520.3997</b> | <b>1519.7783</b> | <b>0.6214</b> | <b>0</b> | <b>82</b> | <b>9.7e-07</b> | <b>1</b> | <b>K.AAGQAGIFEVFTGPR.M</b>       |
| <a href="#">14892</a> | 926.8299        | 2777.4677        | 2776.5997        | 0.8680        | 1        | 0         | 99             | 7        | R.NGLIVGLLSIGTMIGALVAAPIADRIGR.K |

295. [gi|220689217|gb|EED45568.1|](#) Mass: 34079 Score: 82 Queries matched: 5 emPAI: 0.10

opsin, putative [Aspergillus flavus NRRL3357]

| Query                | Observed | Mr(expt)  | Mr(calc)  | Delta   | Miss | Score | Expect | Rank | Peptide           |
|----------------------|----------|-----------|-----------|---------|------|-------|--------|------|-------------------|
| <a href="#">3289</a> | 684.3381 | 1366.6617 | 1366.7861 | -0.1243 | 0    | 2     | 1e+02  | 2    | R.FFGTVSGVSLLIK.A |



[3792](#) **713.8201** **1425.6257** **1424.8755** **0.7502** **0** **62** **9.6e-05** **1** **K.ALFPVAIAAGALALK.I** [3785](#) [3797](#)  
[13036](#) **822.1625** **2463.4657** **2463.4327** **0.0330** **0** **0** **1.2e+02** **3** **R.TLWVVVVLMAISAIVFYILASR.A**

296. [gi|220693342|gb|EED49687.1|](#) **Mass:** 62379 **Score:** 82 **Queries matched:** 14 **emPAI:** 0.05

phosphoglucomutase, putative [Aspergillus flavus NRRL3357]

| Query                 | Observed        | Mr(expt)         | Mr(calc)         | Delta          | Miss     | Score     | Expect       | Rank     | Peptide                                               |
|-----------------------|-----------------|------------------|------------------|----------------|----------|-----------|--------------|----------|-------------------------------------------------------|
| <a href="#">3504</a>  | <b>695.4651</b> | <b>1388.9157</b> | <b>1390.7205</b> | <b>-1.8047</b> | <b>0</b> | <b>3</b>  | <b>84</b>    | <b>1</b> | <b>R.SAPSNLPPVAPEGR.A</b>                             |
| <a href="#">4560</a>  | 506.0672        | 1515.1797        | 1515.7504        | -0.5707        | 0        | 14        | 6.4          | 4        | K.GSIMVTGSHIPFDR.N                                    |
| <a href="#">6159</a>  | <b>827.7316</b> | <b>1653.4487</b> | <b>1653.8434</b> | <b>-0.3947</b> | <b>1</b> | <b>4</b>  | <b>53</b>    | <b>7</b> | <b>K.KDEQPINNNVQVTR.E</b> <a href="#">6189</a>        |
| <a href="#">6572</a>  | 842.2546        | 1682.4947        | 1680.8795        | 1.6153         | 0        | 3         | 79           | 3        | R.ADAIASQGVAEPNGLLR.S                                 |
| <a href="#">6796</a>  | <b>851.3116</b> | <b>1700.6087</b> | <b>1699.9079</b> | <b>0.7008</b>  | <b>0</b> | <b>67</b> | <b>3e-05</b> | <b>1</b> | <b>R.DAVLPLLALFAAGNR.G</b> <a href="#">6813</a>       |
| <a href="#">9002</a>  | <b>960.2301</b> | <b>1918.4457</b> | <b>1916.0190</b> | <b>2.4268</b>  | <b>1</b> | <b>1</b>  | <b>1e+02</b> | <b>1</b> | <b>K.TKIGSPYVIAGMQHSLSK.G</b>                         |
| <a href="#">10319</a> | <b>692.1415</b> | <b>2073.4027</b> | <b>2072.0949</b> | <b>1.3078</b>  | <b>2</b> | <b>4</b>  | <b>57</b>    | <b>2</b> | <b>K.IGSPYVIAGMQHSLSKGRR.R</b>                        |
| <a href="#">12370</a> | <b>790.1669</b> | <b>2367.4787</b> | <b>2368.1369</b> | <b>-0.6581</b> | <b>0</b> | <b>3</b>  | <b>60</b>    | <b>1</b> | <b>R.EELLSQPYAESLNFQOQMLR.S</b>                       |
| <a href="#">13340</a> | <b>834.2442</b> | <b>2499.7107</b> | <b>2500.2672</b> | <b>-0.5564</b> | <b>0</b> | <b>5</b>  | <b>41</b>    | <b>2</b> | <b>K.DEGMHPINLGAIPALTYALK.H</b> <a href="#">13344</a> |
| <a href="#">13550</a> | <b>842.3065</b> | <b>2523.8977</b> | <b>2521.2747</b> | <b>2.6230</b>  | <b>2</b> | <b>5</b>  | <b>36</b>    | <b>2</b> | <b>K.GSIMVTGSHIPFDRNGYKLNTSK.G</b>                    |
| <a href="#">15038</a> | <b>943.7929</b> | <b>2828.3567</b> | <b>2827.4464</b> | <b>0.9103</b>  | <b>1</b> | <b>0</b>  | <b>1e+02</b> | <b>5</b> | <b>R.IYAVADTQERADAIASQGVAEPNGLLR.S</b>                |

297. [gi|220699827|gb|EED56166.1|](#) **Mass:** 53418 **Score:** 81 **Queries matched:** 17 **emPAI:** 0.13

catalase, putative [Aspergillus flavus NRRL3357]

| Query                 | Observed         | Mr(expt)         | Mr(calc)         | Delta          | Miss     | Score     | Expect         | Rank     | Peptide                                                    |
|-----------------------|------------------|------------------|------------------|----------------|----------|-----------|----------------|----------|------------------------------------------------------------|
| <a href="#">974</a>   | 513.0636         | 1024.1127        | 1023.5237        | 0.5891         | 1        | 13        | 8.1            | 2        | K.LTKEDGSFK.Y <a href="#">975</a>                          |
| <a href="#">1040</a>  | 520.5406         | 1039.0667        | 1040.4749        | -1.4082        | 0        | 9         | 20             | 3        | R.MFAYPDAAR.Y                                              |
| <a href="#">1106</a>  | 527.0481         | 1052.0817        | 1052.5978        | -0.5161        | 0        | 7         | 34             | 5        | R.TIANLSGHK.N                                              |
| <a href="#">2305</a>  | <b>631.6761</b>  | <b>1261.3377</b> | <b>1260.6350</b> | <b>0.7027</b>  | <b>0</b> | <b>44</b> | <b>0.0075</b>  | <b>1</b> | <b>K.IAGEDPDYLIR.D</b> <a href="#">2302</a>                |
| <a href="#">3417</a>  | <b>460.1969</b>  | <b>1377.5687</b> | <b>1375.6343</b> | <b>1.9344</b>  | <b>1</b> | <b>10</b> | <b>15</b>      | <b>4</b> | <b>R.MFAYPDAARYR.L</b>                                     |
| <a href="#">3512</a>  | <b>695.7081</b>  | <b>1389.4017</b> | <b>1388.6547</b> | <b>0.7470</b>  | <b>1</b> | <b>6</b>  | <b>39</b>      | <b>4</b> | <b>K.YRWNIFDMTK.V</b>                                      |
| <a href="#">3590</a>  | 700.3761         | 1398.7377        | 1398.7765        | -0.0388        | 2        | (12)      | 9.1            | 3        | R.QIGKLTMNRNPK.N <a href="#">3602</a> <a href="#">3614</a> |
| <a href="#">4003</a>  | <b>724.6456</b>  | <b>1447.2767</b> | <b>1446.6951</b> | <b>0.5817</b>  | <b>0</b> | <b>51</b> | <b>0.0014</b>  | <b>1</b> | <b>R.VSTVGPEAGSADTTR.D</b>                                 |
| <a href="#">7091</a>  | 864.2296         | 1726.4447        | 1725.9315        | 0.5133         | 2        | 6         | 32             | 3        | K.VWSHKDYPLRQIGK.L                                         |
| <a href="#">11060</a> | <b>725.8275</b>  | <b>2174.4607</b> | <b>2172.9600</b> | <b>1.5007</b>  | <b>0</b> | <b>0</b>  | <b>1.2e+02</b> | <b>9</b> | <b>R.FDDNYGGDPNYVGSSLQPTK.F</b>                            |
| <a href="#">11530</a> | <b>747.5405</b>  | <b>2239.5997</b> | <b>2240.0671</b> | <b>-0.4673</b> | <b>1</b> | <b>5</b>  | <b>38</b>      | <b>5</b> | <b>K.IAGEDPDYLIRDMFEAIEK.G</b>                             |
| <a href="#">11917</a> | <b>1149.8231</b> | <b>2297.6317</b> | <b>2295.0518</b> | <b>2.5799</b>  | <b>0</b> | <b>4</b>  | <b>53</b>      | <b>1</b> | <b>K.GDYPVWNVVYQVMDPADAEK.Y</b>                            |
| <a href="#">15965</a> | <b>1082.3855</b> | <b>3244.1347</b> | <b>3243.5315</b> | <b>0.6032</b>  | <b>2</b> | <b>5</b>  | <b>29</b>      | <b>2</b> | <b>K.NMTAEESLKIAGEDPDYLIRDMFEAIEK.G</b>                    |

298. [gi|220690790|gb|EED47139.1|](#) **Mass:** 42488 **Score:** 81 **Queries matched:** 12 **emPAI:** 0.08

glutamine synthetase [Aspergillus flavus NRRL3357]

| Query               | Observed | Mr(expt) | Mr(calc) | Delta  | Miss | Score | Expect | Rank | Peptide      |
|---------------------|----------|----------|----------|--------|------|-------|--------|------|--------------|
| <a href="#">366</a> | 856.9270 | 855.9197 | 854.5086 | 1.4111 | 1    | 4     | 60     | 5    | R.GGSIRIPR.Q |

|                       |                 |                  |                  |                |          |           |                |           |                                                    |
|-----------------------|-----------------|------------------|------------------|----------------|----------|-----------|----------------|-----------|----------------------------------------------------|
| <a href="#">632</a>   | 470.2471        | 938.4797         | 938.4280         | 0.0517         | 0        | 16        | 3.5            | 2         | K.YMNL DQR.G                                       |
| <a href="#">897</a>   | 501.7006        | 1001.3867        | 1001.4930        | -0.1063        | 0        | 17        | 3.4            | 3         | R.DIVEA HYR.A <a href="#">895</a>                  |
| <a href="#">4960</a>  | <b>776.9306</b> | <b>1551.8467</b> | <b>1553.7243</b> | <b>-1.8776</b> | 0        | 0         | <b>1.3e+02</b> | <b>10</b> | <b>M.SESTTISNTENLMK.Y</b>                          |
| <a href="#">5135</a>  | <b>786.3451</b> | <b>1570.6757</b> | <b>1569.7192</b> | <b>0.9565</b>  | 0        | (0)       | <b>1.5e+02</b> | <b>4</b>  | <b>M.SESTTISNTENLMK.Y</b>                          |
| <a href="#">7550</a>  | <b>887.1366</b> | <b>1772.2587</b> | <b>1771.7988</b> | <b>0.4599</b>  | 0        | <b>55</b> | <b>0.00042</b> | <b>1</b>  | <b>K.GGFPGAQGPYYCGVGTGK.V <a href="#">7574</a></b> |
| <a href="#">8383</a>  | 619.0132        | 1854.0177        | 1854.8973        | -0.8796        | 0        | 4         | 54             | 8         | K.GEWNGAGLHSNVSTVATR.A                             |
| <a href="#">10984</a> | <b>722.7529</b> | <b>2165.2367</b> | <b>2166.0640</b> | <b>-0.8273</b> | <b>2</b> | <b>4</b>  | <b>47</b>      | <b>1</b>  | <b>R.GRVQAEYVWIDSVGGCRSK.T</b>                     |
| <a href="#">11542</a> | <b>748.2292</b> | <b>2241.6657</b> | <b>2241.0563</b> | <b>0.6095</b>  | <b>1</b> | <b>3</b>  | <b>61</b>      | <b>9</b>  | <b>K.FEARHVEHIAVYEGNEER.L</b>                      |
| <a href="#">13288</a> | 831.7119        | 2492.1137        | 2490.1366        | 1.9771         | 1        | 1         | 88             | 8         | M.SESTTISNTENLMKYMNL DQR.G                         |

299. [gi|220698453|gb|EED54793.1|](#) Mass: 63341 Score: 80 Queries matched: 11 emPAI: 0.05

nucleolar protein nop5 [Aspergillus flavus NRRL3357]

| Query                 | Observed        | Mr(expt)         | Mr(calc)         | Delta          | Miss | Score     | Expect         | Rank     | Peptide                                             |
|-----------------------|-----------------|------------------|------------------|----------------|------|-----------|----------------|----------|-----------------------------------------------------|
| <a href="#">830</a>   | 494.4811        | 986.9477         | 986.5648         | 0.3829         | 0    | 7         | 36             | 10       | R.LASLLDEVK.D                                       |
| <a href="#">2760</a>  | <b>656.9186</b> | <b>1311.8227</b> | <b>1311.7333</b> | <b>0.0895</b>  | 0    | <b>9</b>  | <b>20</b>      | <b>1</b> | <b>K.LAGMEGKPLKPR.G</b>                             |
| <a href="#">2862</a>  | <b>662.6866</b> | <b>1323.3587</b> | <b>1323.7510</b> | <b>-0.3923</b> | 0    | <b>4</b>  | <b>59</b>      | <b>3</b> | <b>R.LIAHAGSLTNLSK.S</b>                            |
| <a href="#">4342</a>  | 744.2966        | 1486.5787        | 1486.8242        | -0.2455        | 2    | 8         | 23             | 2        | R.LASLLDEVKDEKK.V <a href="#">4356</a>              |
| <a href="#">5174</a>  | 525.5425        | 1573.6057        | 1574.8528        | -1.2471        | 2    | 5         | 45             | 6        | K.AALGTEARFNLERK.L                                  |
| <a href="#">7965</a>  | 604.4855        | 1810.4347        | 1807.8588        | 2.5759         | 2    | 8         | 24             | 4        | R.KYNADADAVDEPSSAKK.Q                               |
| <a href="#">8916</a>  | <b>956.1331</b> | <b>1910.2517</b> | <b>1909.0455</b> | <b>1.2062</b>  | 0    | <b>80</b> | <b>1.3e-06</b> | <b>1</b> | <b>R.MNAIAPNLTALVGELVGAR.L <a href="#">8904</a></b> |
| <a href="#">10415</a> | 696.2425        | 2085.7057        | 2086.1384        | -0.4327        | 1    | 9         | 17             | 3        | -.MTLFILFETTSAGYALLKAK.D                            |
| <a href="#">11291</a> | 1104.2441       | 2206.4737        | 2205.0913        | 1.3824         | 2    | 1         | 1.2e+02        | 7        | R.KLERGEIEFDAEGNPSSISK.K                            |

300. [gi|220701606|gb|EED57944.1|](#) Mass: 37465 Score: 80 Queries matched: 6 emPAI: 0.09

eukaryotic translation initiation factor 3 subunit 2i, putative [Aspergillus flavus NRRL3357]

| Query                 | Observed        | Mr(expt)         | Mr(calc)         | Delta         | Miss | Score     | Expect         | Rank     | Peptide                                                     |
|-----------------------|-----------------|------------------|------------------|---------------|------|-----------|----------------|----------|-------------------------------------------------------------|
| <a href="#">4022</a>  | 484.0702        | 1449.1887        | 1447.6667        | 1.5221        | 0    | 7         | 30             | 7        | K.IVCAWWSANGER.L                                            |
| <a href="#">6259</a>  | <b>831.7701</b> | <b>1661.5257</b> | <b>1660.8672</b> | <b>0.6585</b> | 0    | <b>80</b> | <b>1.5e-06</b> | <b>1</b> | <b>K.TYVADTPLNSAAITPK.K</b>                                 |
| <a href="#">8979</a>  | 639.6739        | 1915.9997        | 1917.0320        | -1.0322       | 2    | 1         | 1e+02          | 10       | K.RVEFTP DGSRL LAVTEK.R                                     |
| <a href="#">11725</a> | 759.2239        | 2274.6497        | 2274.0204        | 0.6293        | 0    | 2         | 74             | 7        | R.VHHFDKPYFDFMYEVER.E                                       |
| <a href="#">15408</a> | <b>993.2565</b> | <b>2976.7477</b> | <b>2975.3897</b> | <b>1.3580</b> | 0    | <b>8</b>  | <b>16</b>      | <b>1</b> | <b>K.TGEQLENVQAHEFDNLISDIQFSADR.T <a href="#">15410</a></b> |

301. [gi|220696664|gb|EED53006.1|](#) Mass: 58654 Score: 80 Queries matched: 10 emPAI: 0.06

cytosolic hydroxymethyltransferase, putative [Aspergillus flavus NRRL3357]

| Query                | Observed        | Mr(expt)         | Mr(calc)         | Delta          | Miss | Score    | Expect    | Rank     | Peptide                    |
|----------------------|-----------------|------------------|------------------|----------------|------|----------|-----------|----------|----------------------------|
| <a href="#">628</a>  | 937.8920        | 936.8847         | 937.4505         | -0.5658        | 0    | 0        | 1.4e+02   | 10       | K.QAQSTEFK.T               |
| <a href="#">4654</a> | 762.6321        | 1523.2497        | 1522.8191        | 0.4307         | 2    | 5        | 49        | 7        | K.SLRGPRGAMIFYR.K          |
| <a href="#">6549</a> | <b>841.7656</b> | <b>1681.5167</b> | <b>1680.8094</b> | <b>0.7073</b>  | 0    | <b>8</b> | <b>24</b> | <b>1</b> | <b>R.LDESTGLIDYDALEK.Q</b> |
| <a href="#">8068</a> | <b>607.1489</b> | <b>1818.4247</b> | <b>1819.8781</b> | <b>-1.4534</b> | 0    | <b>3</b> | <b>80</b> | <b>6</b> | <b>R.QEVEDWVGTFSLPWK.D</b> |

|                       |                  |                  |                  |               |          |           |                |          |                                                                   |
|-----------------------|------------------|------------------|------------------|---------------|----------|-----------|----------------|----------|-------------------------------------------------------------------|
| <a href="#">8901</a>  | 637.2899         | 1908.8477        | 1908.0469        | 0.8009        | 1        | 1         | 1.1e+02        | 9        | K.LIIAGTSAYSRLIDYPR.M                                             |
| <a href="#">11737</a> | 759.3292         | 2274.9657        | 2274.1216        | 0.8442        | 0        | 4         | 49             | 2        | R.LMGLDLPHGGHLSHGYPPTK.K                                          |
| <a href="#">12628</a> | <b>802.1775</b>  | <b>2403.5107</b> | <b>2402.2165</b> | <b>1.2942</b> | <b>1</b> | <b>2</b>  | <b>71</b>      | <b>3</b> | <b>R.LMGLDLPHGGHLSHGYPPTK.I</b> <a href="#">12608</a>             |
| <a href="#">16393</a> | <b>1159.3032</b> | <b>3474.8877</b> | <b>3474.7531</b> | <b>0.1346</b> | <b>0</b> | <b>71</b> | <b>6.1e-06</b> | <b>1</b> | <b>R.LNPEEWGVNVQPLSGSPANLYAISALLNTHDR.L</b> <a href="#">16392</a> |

302. [gi|220691646|gb|EED47994.1|](#) Mass: 113354 Score: 80 Queries matched: 27 emPAI: 0.12

plasma membrane H(+)ATPase, putative [Aspergillus flavus NRRL3357]

| Query                 | Observed         | Mr(expt)         | Mr(calc)         | Delta          | Miss     | Score     | Expect        | Rank     | Peptide                                        |
|-----------------------|------------------|------------------|------------------|----------------|----------|-----------|---------------|----------|------------------------------------------------|
| <a href="#">171</a>   | <b>763.4390</b>  | <b>762.4317</b>  | <b>762.2919</b>  | <b>0.1398</b>  | <b>0</b> | <b>9</b>  | <b>24</b>     | <b>4</b> | <b>K.EEEVEE.-</b> <a href="#">170</a>          |
| <a href="#">900</a>   | <b>501.8581</b>  | <b>1001.7017</b> | <b>1000.5553</b> | <b>1.1464</b>  | <b>0</b> | <b>40</b> | <b>0.021</b>  | <b>1</b> | <b>K.QAADVVASLK.G</b>                          |
| <a href="#">1379</a>  | 1104.6170        | 1103.6097        | 1102.6056        | 1.0041         | 0        | (14)      | 7.8           | 2        | K.MLTGDALAIK.E                                 |
| <a href="#">1467</a>  | <b>560.4941</b>  | <b>1118.9737</b> | <b>1118.6005</b> | <b>0.3732</b>  | <b>0</b> | <b>40</b> | <b>0.016</b>  | <b>1</b> | <b>K.MLTGDALAIK.E</b>                          |
| <a href="#">1661</a>  | 575.6806         | 1149.3467        | 1148.5978        | 0.7489         | 1        | 17        | 3.3           | 2        | K.FKWLLDLGR.E <a href="#">1660</a>             |
| <a href="#">1699</a>  | <b>580.6041</b>  | <b>1159.1937</b> | <b>1157.5676</b> | <b>1.6261</b>  | <b>0</b> | <b>47</b> | <b>0.0035</b> | <b>1</b> | <b>R.DGQEQEILAR.E</b> <a href="#">1690</a>     |
| <a href="#">1916</a>  | 603.2901         | 1204.5657        | 1203.6282        | 0.9376         | 0        | 2         | 1.1e+02       | 4        | R.IVTIASCDGIR.Y                                |
| <a href="#">2628</a>  | 648.7461         | 1295.4777        | 1294.6340        | 0.8438         | 0        | 6         | 36            | 5        | K.YQVVQMLQDR.G                                 |
| <a href="#">3067</a>  | <b>673.7396</b>  | <b>1345.4647</b> | <b>1345.6303</b> | <b>-0.1655</b> | <b>0</b> | <b>30</b> | <b>0.18</b>   | <b>1</b> | <b>K.ADGFAEVFPEHK.Y</b> <a href="#">3076</a>   |
| <a href="#">3650</a>  | 704.0981         | 1406.1817        | 1405.7354        | 0.4463         | 2        | 7         | 34            | 2        | K.FKWLLDLGREK.R                                |
| <a href="#">4335</a>  | <b>496.2102</b>  | <b>1485.6087</b> | <b>1485.7973</b> | <b>-0.1886</b> | <b>1</b> | <b>8</b>  | <b>23</b>     | <b>3</b> | <b>K.GAPKAVLQLTNCCK.Q</b>                      |
| <a href="#">5917</a>  | 546.4632         | 1636.3677        | 1636.8164        | -0.4487        | 1        | 4         | 56            | 6        | K.MLTGDALAIKTK.M <a href="#">5922</a>          |
| <a href="#">6996</a>  | <b>859.0436</b>  | <b>1716.0727</b> | <b>1713.9010</b> | <b>2.1718</b>  | <b>1</b> | <b>2</b>  | <b>83</b>     | <b>3</b> | <b>R.TTVVRDQEQEILAR.E</b> <a href="#">6989</a> |
| <a href="#">9301</a>  | <b>653.9272</b>  | <b>1958.7597</b> | <b>1956.9649</b> | <b>1.7949</b>  | <b>2</b> | <b>2</b>  | <b>94</b>     | <b>3</b> | <b>K.ETCKMLALGTVYNSDK.L</b>                    |
| <a href="#">9622</a>  | 666.6602         | 1996.9587        | 1994.9882        | 1.9705         | 1        | 2         | 86            | 5        | R.VAQAPGSQGRLLSTSEGHASR.R                      |
| <a href="#">9665</a>  | 668.6535         | 2002.9387        | 2000.0704        | 2.8683         | 2        | 4         | 49            | 2        | K.AQEFahrGFRSLGVAVQK.E                         |
| <a href="#">9756</a>  | 672.6525         | 2014.9357        | 2013.0136        | 1.9222         | 2        | 2         | 88            | 3        | K.RIVTIASCDGIRYTK.G                            |
| <a href="#">12359</a> | <b>789.4205</b>  | <b>2365.2397</b> | <b>2363.2898</b> | <b>1.9499</b>  | <b>0</b> | <b>1</b>  | <b>96</b>     | <b>6</b> | <b>K.IWFISCLLGLLLAMGTWVVR.G</b>                |
| <a href="#">15309</a> | <b>1467.5201</b> | <b>2933.0257</b> | <b>2931.4511</b> | <b>1.5747</b>  | <b>1</b> | <b>0</b>  | <b>1e+02</b>  | <b>1</b> | <b>R.SLGVAVQKEGEWTLGLMLPMFPPR.E</b>            |
| <a href="#">15909</a> | 1071.2992        | 3210.8757        | 3208.5205        | 2.3552         | 2        | 0         | 87            | 8        | M.AEQGGASNDVERVAQAPGSQGRLLSTSEGHASR.R          |
| <a href="#">16016</a> | <b>1092.5282</b> | <b>3274.5627</b> | <b>3271.7048</b> | <b>2.8579</b>  | <b>1</b> | <b>1</b>  | <b>76</b>     | <b>2</b> | <b>R.DGQEQEILARELVPGDVIIIGDGQVVPADAR.I</b>     |

303. [gi|220691457|gb|EED47805.1|](#) Mass: 53959 Score: 79 Queries matched: 12 emPAI: 0.06

fatty acid desaturase family protein [Aspergillus flavus NRRL3357]

| Query                 | Observed         | Mr(expt)         | Mr(calc)         | Delta         | Miss     | Score     | Expect         | Rank     | Peptide                                           |
|-----------------------|------------------|------------------|------------------|---------------|----------|-----------|----------------|----------|---------------------------------------------------|
| <a href="#">1607</a>  | 1139.7120        | 1138.7047        | 1137.4981        | 1.2067        | 0        | 1         | 1.3e+02        | 10       | K.MPMLMDSTGR.R                                    |
| <a href="#">2873</a>  | 663.8056         | 1325.5967        | 1325.5890        | 0.0077        | 1        | 19        | 2.1            | 2        | K.MPMLMDSTGRR.I                                   |
| <a href="#">2876</a>  | 664.1221         | 1326.2297        | 1325.5890        | 0.6407        | 1        | (12)      | 10             | 4        | K.MPMLMDSTGRR.I <a href="#">2883</a>              |
| <a href="#">4337</a>  | <b>496.2862</b>  | <b>1485.8367</b> | <b>1483.7783</b> | <b>2.0584</b> | <b>1</b> | <b>8</b>  | <b>25</b>      | <b>5</b> | <b>K.EHPGGKAFISSAVGK.D</b>                        |
| <a href="#">7710</a>  | <b>893.1951</b>  | <b>1784.3757</b> | <b>1783.0244</b> | <b>1.3513</b> | <b>0</b> | <b>70</b> | <b>1.5e-05</b> | <b>1</b> | <b>R.ALVTIGGVIHDITSFIK.E</b> <a href="#">7700</a> |
| <a href="#">10702</a> | <b>1064.6656</b> | <b>2127.3167</b> | <b>2126.1960</b> | <b>1.1207</b> | <b>1</b> | <b>6</b>  | <b>35</b>      | <b>1</b> | <b>K.ATLPLRIYLAAAGAGAGQGSIR.W</b>                 |

|                       |                 |                  |                  |                |   |   |    |    |                                     |
|-----------------------|-----------------|------------------|------------------|----------------|---|---|----|----|-------------------------------------|
| <a href="#">11118</a> | 729.1789        | 2184.5147        | 2185.1348        | -0.6200        | 2 | 1 | 96 | 10 | R.IVRAGDQVTRMVQVPMVSA.-             |
| <a href="#">12883</a> | 813.2992        | 2436.8757        | 2435.2002        | 1.6755         | 1 | 1 | 89 | 4  | M.ALDAKSPTVATLNDGTTDYVPMR.K         |
| <a href="#">13896</a> | <b>861.4855</b> | <b>2581.4347</b> | <b>2582.2356</b> | <b>-0.8009</b> | 1 | 3 | 57 | 3  | <b>-.MALDAKSPTVATLNDGTTDYVPMR.K</b> |
| <a href="#">14621</a> | <b>904.5289</b> | <b>2710.5647</b> | <b>2710.3306</b> | <b>0.2341</b>  | 2 | 2 | 65 | 2  | <b>-.MALDAKSPTVATLNDGTTDYVPMR.K</b> |

304. [gi|220701658|gb|EED57996.1|](#) Mass: 49696 Score: 79 Queries matched: 18 emPAI: 0.14

eukaryotic translation initiation factor 4, putative [Aspergillus flavus NRRL3357]

| Query                 | Observed         | Mr(expt)         | Mr(calc)         | Delta          | Miss | Score      | Expect         | Rank     | Peptide                                              |
|-----------------------|------------------|------------------|------------------|----------------|------|------------|----------------|----------|------------------------------------------------------|
| <a href="#">26</a>    | 650.4130         | 649.4057         | 648.3456         | 1.0601         | 1    | 5          | 60             | 8        | R.GGRFGR.K                                           |
| <a href="#">1276</a>  | <b>543.0841</b>  | <b>1084.1537</b> | <b>1083.6652</b> | <b>0.4885</b>  | 0    | <b>67</b>  | <b>3.2e-05</b> | <b>1</b> | <b>R.VLIATDLLAR.G</b>                                |
| <a href="#">1691</a>  | 579.9471         | 1157.8797        | 1157.6656        | 0.2142         | 1    | 26         | 0.47           | 3        | K.KQELTLEGIK.Q <a href="#">1689</a>                  |
| <a href="#">3408</a>  | <b>689.4101</b>  | <b>1376.8057</b> | <b>1375.7096</b> | <b>1.0961</b>  | 0    | <b>3</b>   | <b>84</b>      | <b>5</b> | <b>K.GVAINFVTADDVR.M</b>                             |
| <a href="#">3981</a>  | <b>723.6671</b>  | <b>1445.3197</b> | <b>1444.8038</b> | <b>0.5159</b>  | 2    | <b>11</b>  | <b>13</b>      | <b>1</b> | <b>R.KVDWLTDKLTAR.D</b>                              |
| <a href="#">5022</a>  | <b>520.5405</b>  | <b>1558.5997</b> | <b>1557.8838</b> | <b>0.7159</b>  | 1    | <b>11</b>  | <b>13</b>      | <b>1</b> | <b>R.SGSSRVLIATDLLAR.G</b>                           |
| <a href="#">8000</a>  | <b>907.3266</b>  | <b>1812.6387</b> | <b>1809.8866</b> | <b>2.7521</b>  | 1    | <b>0</b>   | <b>1.4e+02</b> | <b>1</b> | <b>K.GVAINFVTADDVRMMR.E</b>                          |
| <a href="#">9541</a>  | <b>996.0236</b>  | <b>1990.0327</b> | <b>1990.0959</b> | <b>-0.0632</b> | 2    | <b>2</b>   | <b>89</b>      | <b>4</b> | <b>K.EFRSGSSRVLIATDLLAR.G</b>                        |
| <a href="#">10618</a> | <b>1058.3581</b> | <b>2114.7017</b> | <b>2113.1168</b> | <b>1.5850</b>  | 0    | <b>11</b>  | <b>11</b>      | <b>1</b> | <b>R.GIDVQVSLVINYPANR.E</b>                          |
| <a href="#">11894</a> | <b>1148.4486</b> | <b>2294.8827</b> | <b>2295.0372</b> | <b>-0.1545</b> | 1    | <b>(1)</b> | <b>1.1e+02</b> | <b>1</b> | <b>K.LTARDFTVSAMHGDMESQR.D</b>                       |
| <a href="#">12032</a> | 771.3519         | 2311.0337        | 2311.0321        | 0.0016         | 1    | 1          | 1e+02          | 8        | K.LTARDFTVSAMHGDMESQR.D                              |
| <a href="#">12180</a> | 778.0212         | 2331.0417        | 2332.1958        | -1.1541        | 1    | 2          | 85             | 2        | K.ALGEGPEVVVGTGPRVHDMIQR.R                           |
| <a href="#">12529</a> | 797.1885         | 2388.5437        | 2389.2437        | -0.7000        | 2    | 2          | 85             | 9        | K.HPHLYTSRCGLRSQPIAVQG.-                             |
| <a href="#">13482</a> | <b>840.6809</b>  | <b>2519.0207</b> | <b>2516.2944</b> | <b>2.7263</b>  | 2    | <b>5</b>   | <b>40</b>      | <b>5</b> | <b>R.VLKTDLHLKQFILDDEADMLSR.G</b>                    |
| <a href="#">14411</a> | <b>1338.3441</b> | <b>2674.6737</b> | <b>2672.3367</b> | <b>2.3370</b>  | 0    | <b>46</b>  | <b>0.0031</b>  | <b>1</b> | <b>K.LDTLSDLYETVTITQAVIFCNTR.R</b>                   |
| <a href="#">15850</a> | 1060.3039        | 3177.8897        | 3178.7714        | -0.8817        | 1    | 1          | 70             | 10       | R.VLIATDLLARGIDVQVSLVINYPANR.E <a href="#">15854</a> |

305. [gi|220699434|gb|EED55773.1|](#) Mass: 79179 Score: 77 Queries matched: 22 emPAI: 0.04

trehalose synthase (Ccg-9), putative [Aspergillus flavus NRRL3357]

| Query                | Observed        | Mr(expt)         | Mr(calc)         | Delta         | Miss | Score     | Expect         | Rank     | Peptide                                    |
|----------------------|-----------------|------------------|------------------|---------------|------|-----------|----------------|----------|--------------------------------------------|
| <a href="#">259</a>  | 408.4841        | 814.9537         | 813.4709         | 1.4829        | 0    | 10        | 19             | 6        | K.GTPVIATR.A <a href="#">257</a>           |
| <a href="#">1002</a> | <b>516.5986</b> | <b>1031.1827</b> | <b>1029.5791</b> | <b>1.6036</b> | 2    | <b>8</b>  | <b>27</b>      | <b>3</b> | <b>R.SSLRQRR.L <a href="#">991</a></b>     |
| <a href="#">1189</a> | 534.8451        | 1067.6757        | 1067.5975        | 0.0782        | 0    | 10        | 15             | 5        | R.AGGIPLQVADK.Q                            |
| <a href="#">1489</a> | <b>561.7016</b> | <b>1121.3887</b> | <b>1120.5183</b> | <b>0.8705</b> | 0    | <b>12</b> | <b>11</b>      | <b>1</b> | <b>-.MADDSNAILR.R <a href="#">1483</a></b> |
| <a href="#">2937</a> | <b>666.2666</b> | <b>1330.5187</b> | <b>1329.7140</b> | <b>0.8047</b> | 0    | <b>10</b> | <b>19</b>      | <b>6</b> | <b>R.EDDTLTIAIAIR.D</b>                    |
| <a href="#">3241</a> | 681.8566        | 1361.6987        | 1360.7537        | 0.9451        | 1    | 13        | 8.5            | 5        | K.FIGLAMPERIAK.Q <a href="#">3233</a>      |
| <a href="#">3337</a> | <b>686.3906</b> | <b>1370.7667</b> | <b>1369.5746</b> | <b>1.1921</b> | 0    | <b>7</b>  | <b>32</b>      | <b>1</b> | <b>R.AGAGQEYTSDESR.L</b>                   |
| <a href="#">3861</a> | <b>717.2366</b> | <b>1432.4587</b> | <b>1429.7314</b> | <b>2.7274</b> | 1    | <b>12</b> | <b>11</b>      | <b>1</b> | <b>K.AVQHYATDLKER.K</b>                    |
| <a href="#">4184</a> | <b>735.2441</b> | <b>1468.4737</b> | <b>1467.8297</b> | <b>0.6441</b> | 0    | <b>77</b> | <b>2.7e-06</b> | <b>1</b> | <b>R.LGSPDQLLNALLSK.A</b>                  |
| <a href="#">4930</a> | 776.0496        | 1550.0847        | 1547.8195        | 2.2652        | 0    | 5         | 47             | 3        | K.VALQLSTQEGFEVK.V                         |
| <a href="#">5310</a> | 794.6816        | 1587.3487        | 1588.7991        | -1.4504       | 2    | (0)       | 1.5e+02        | 3        | K.IRGIDEQAESMGRK.C                         |

|                       |           |           |           |         |   |   |         |    |                                  |
|-----------------------|-----------|-----------|-----------|---------|---|---|---------|----|----------------------------------|
| <a href="#">5548</a>  | 804.3496  | 1606.6847 | 1604.7940 | 1.8907  | 2 | 2 | 1.1e+02 | 1  | K.IRGIDEQAESMGRK.C               |
| <a href="#">6322</a>  | 834.1741  | 1666.3337 | 1667.8672 | -1.5334 | 1 | 4 |         | 65 | K.FTFGIPDSTTWKIR.G               |
| <a href="#">7181</a>  | 580.6912  | 1739.0517 | 1737.8872 | 1.1645  | 0 | 3 |         | 72 | K.IAFFSATPQGGVALMR.H             |
| <a href="#">8235</a>  | 614.1859  | 1839.5357 | 1839.9115 | -0.3758 | 0 | 6 |         | 33 | R.SDLIDKPGTPQAEAWGR.L            |
| <a href="#">9675</a>  | 669.1059  | 2004.2957 | 2005.0341 | -0.7383 | 1 | 2 |         | 89 | R.VTKNNHNILQGVASPEER.L           |
| <a href="#">15976</a> | 1084.2895 | 3249.8467 | 3249.4958 | 0.3509  | 1 | 3 |         | 44 | K.DDQSLCSVLEKFVIDQLQEWSDAHMEK.F  |
| <a href="#">16201</a> | 1119.3655 | 3355.0747 | 3352.5281 | 2.5466  | 2 | 1 |         | 69 | K.VGYMPASTDWLDGLNKNMREWDIAYYGR.V |

306. [gi|220699831|gb|EED56170.1|](#) Mass: 127414 Score: 77 Queries matched: 29 emPAI: 0.05

leucyl-tRNA synthetase [Aspergillus flavus NRRL3357]

| Query                 | Observed  | Mr(expt)  | Mr(calc)  | Delta   | Miss | Score | Expect  | Rank | Peptide                                                                                               |
|-----------------------|-----------|-----------|-----------|---------|------|-------|---------|------|-------------------------------------------------------------------------------------------------------|
| <a href="#">540</a>   | 911.6840  | 910.6767  | 910.4252  | 0.2515  | 1    | 6     |         | 37   | K.VGKMGEMK.K                                                                                          |
| <a href="#">788</a>   | 490.4151  | 978.8157  | 978.4957  | 0.3200  | 0    | 15    | 4.5     | 1    | K.VEFMAGVAR.M <a href="#">794</a>                                                                     |
| <a href="#">1563</a>  | 567.1771  | 1132.3397 | 1130.6005 | 1.7392  | 0    | 10    |         | 19   | R.ILPMEGVSASK.G <a href="#">1560</a>                                                                  |
| <a href="#">2718</a>  | 654.5606  | 1307.1067 | 1305.6499 | 1.4568  | 0    | 6     |         | 45   | K.IFNEMNGLVR.E                                                                                        |
| <a href="#">4334</a>  | 743.8061  | 1485.5977 | 1485.7423 | -0.1446 | 0    | 9     |         | 20   | M.AAAAASAAALDPSNGTK.N <a href="#">4336</a>                                                            |
| <a href="#">4494</a>  | 753.7601  | 1505.5057 | 1502.7987 | 2.7070  | 2    | 10    |         | 16   | K.SGISKEALQQMRR.E <a href="#">4454</a> <a href="#">4487</a> <a href="#">4495</a> <a href="#">4497</a> |
| <a href="#">5396</a>  | 532.6082  | 1594.8027 | 1591.8417 | 2.9610  | 1    | 1     | 1.1e+02 | 7    | R.ATSSSITSABEQLAKK.A                                                                                  |
| <a href="#">5687</a>  | 809.5336  | 1617.0527 | 1614.8002 | 2.2526  | 1    | 0     | 1.4e+02 | 6    | K.SGLYDLVSARDTYR.E                                                                                    |
| <a href="#">7499</a>  | 590.5339  | 1768.5797 | 1769.8878 | -1.3081 | 2    | 8     |         | 26   | K.MGEMKKAMPFVQTLK.R                                                                                   |
| <a href="#">8333</a>  | 617.6792  | 1850.0157 | 1849.9608 | 0.0550  | 2    | 3     |         | 62   | K.GEGVGPQEYTAMKLVK.E                                                                                  |
| <a href="#">8700</a>  | 630.2025  | 1887.5857 | 1886.9203 | 0.6654  | 1    | 13    | 6.6     | 1    | R.EFEYWYPLDVRVSGK.D <a href="#">8696</a>                                                              |
| <a href="#">10438</a> | 697.5245  | 2089.5517 | 2089.0473 | 0.5044  | 1    | 5     |         | 38   | -.MAAAAASAAALDPSNGTKNTLK.L <a href="#">10447</a>                                                      |
| <a href="#">11202</a> | 731.8362  | 2192.4867 | 2194.1270 | -1.6402 | 1    | 2     |         | 92   | K.YIDLVREAFDGLNLSINDK.E                                                                               |
| <a href="#">11558</a> | 749.1529  | 2244.4367 | 2242.1230 | 2.3137  | 2    | 2     |         | 72   | K.STGNFLTTLKDSVDKFGADATR.I <a href="#">11553</a>                                                      |
| <a href="#">11722</a> | 1138.2406 | 2274.4667 | 2273.0311 | 1.4357  | 0    | 63    | 6e-05   | 1    | K.SLYESGDAFFADPMGEVVS.R.S                                                                             |
| <a href="#">11751</a> | 760.2302  | 2277.6687 | 2275.1428 | 2.5259  | 2    | 3     |         | 57   | R.MDGKRALFPLGFHCTGMPIK.A                                                                              |
| <a href="#">12600</a> | 800.9495  | 2399.8267 | 2401.1260 | -1.2993 | 1    | 1     | 1e+02   | 3    | R.KSLYESGDAFFADPMGEVVS.R.S                                                                            |
| <a href="#">14961</a> | 931.8119  | 2792.4137 | 2793.2751 | -0.8614 | 2    | 3     |         | 59   | R.RQMVTTDANPYDAFVRWQMN.R.L                                                                            |
| <a href="#">16307</a> | 1142.4669 | 3424.3787 | 3422.7470 | 1.6317  | 0    | 37    | 0.018   | 1    | K.SQDQLPLVAEAPGSAYVGTLVNAPLSFHTEGVR.I                                                                 |

307. [gi|220696823|gb|EED53164.1|](#) Mass: 68387 Score: 76 Queries matched: 16 emPAI: 0.15

actin-binding protein, putative [Aspergillus flavus NRRL3357]

| Query                | Observed | Mr(expt)  | Mr(calc)  | Delta  | Miss | Score | Expect | Rank | Peptide                                    |
|----------------------|----------|-----------|-----------|--------|------|-------|--------|------|--------------------------------------------|
| <a href="#">357</a>  | 426.9941 | 851.9737  | 851.4501  | 0.5236 | 0    | 24    | 0.57   | 1    | R.IATTGFSR.M                               |
| <a href="#">2399</a> | 424.8899 | 1271.6477 | 1270.5724 | 1.0753 | 0    | 5     |        | 54   | R.GVNMHENEVAR.A                            |
| <a href="#">2709</a> | 653.8121 | 1305.6097 | 1302.6568 | 2.9529 | 0    | 6     |        | 41   | R.VSANAWDSNLVK.V                           |
| <a href="#">5865</a> | 816.7076 | 1631.4007 | 1629.7972 | 1.6036 | 0    | 2     |        | 96   | R.QERPAHEVQGHSGAK.N                        |
| <a href="#">7244</a> | 871.6016 | 1741.1887 | 1740.9159 | 0.2729 | 1    | 6     |        | 41   | R.VSANAWDSNLVKVNP.K.Y <a href="#">7231</a> |

|                       |                  |                  |                  |               |          |           |                |          |                                                                |
|-----------------------|------------------|------------------|------------------|---------------|----------|-----------|----------------|----------|----------------------------------------------------------------|
| <a href="#">7667</a>  | 594.8149         | 1781.4227        | 1782.9013        | -1.4786       | 1        | 8         | 23             | 8        | R.TVESASPVKTSAWHQ.R.E <a href="#">7664</a>                     |
| <a href="#">7950</a>  | <b>904.7371</b>  | <b>1807.4597</b> | <b>1805.9564</b> | <b>1.5034</b> | <b>0</b> | <b>60</b> | <b>0.00014</b> | <b>1</b> | <b>K.TVGDYIEPISFIVPR.R</b>                                     |
| <a href="#">9181</a>  | <b>648.7155</b>  | <b>1943.1247</b> | <b>1943.0014</b> | <b>0.1234</b> | <b>1</b> | <b>2</b>  | <b>78</b>      | <b>2</b> | <b>R.VVWLGEHDRIATTGFSR.M</b>                                   |
| <a href="#">12385</a> | 790.8889         | 2369.6447        | 2370.1411        | -0.4964       | 1        | 5         | 37             | 2        | R.EESKSQTASKPSTPVPAQNDR.S                                      |
| <a href="#">13423</a> | <b>837.6845</b>  | <b>2510.0317</b> | <b>2509.2019</b> | <b>0.8298</b> | <b>2</b> | <b>5</b>  | <b>39</b>      | <b>1</b> | <b>R.KEQCYDNLRVSANAWDSNLVK.V</b>                               |
| <a href="#">14869</a> | <b>925.1962</b>  | <b>2772.5667</b> | <b>2771.4640</b> | <b>1.1027</b> | <b>1</b> | <b>0</b>  | <b>1e+02</b>   | <b>3</b> | <b>K.LTHMVGPLLNEVHEQKQIESLTK.T</b>                             |
| <a href="#">15860</a> | 1063.3369        | 3186.9887        | 3185.6027        | 1.3860        | 2        | 0         | 83             | 3        | K.LTLNVGDMVYSQSWANGSLLVTTSRDKK.L                               |
| <a href="#">15914</a> | <b>1071.7959</b> | <b>3212.3657</b> | <b>3210.5332</b> | <b>1.8325</b> | <b>1</b> | <b>33</b> | <b>0.042</b>   | <b>1</b> | <b>R.RAETFQDDIYPPTVGLTPAMSPSEWFAGK.E</b> <a href="#">15911</a> |

308. [gi|220696271|gb|EED52613.1|](#) Mass: 13124 Score: 76 Queries matched: 10 emPAI: 0.26

40S ribosomal protein S10a [Aspergillus flavus NRRL3357]

| Query                | Observed        | Mr(expt)         | Mr(calc)         | Delta          | Miss     | Score     | Expect       | Rank     | Peptide                                         |
|----------------------|-----------------|------------------|------------------|----------------|----------|-----------|--------------|----------|-------------------------------------------------|
| <a href="#">71</a>   | 690.4360        | 689.4287         | 689.4072         | 0.0215         | 0        | 16        | 5.7          | 5        | R.ITLTSR.K                                      |
| <a href="#">186</a>  | <b>773.9730</b> | <b>772.9657</b>  | <b>773.4647</b>  | <b>-0.4990</b> | <b>1</b> | <b>22</b> | <b>1.2</b>   | <b>1</b> | <b>R.KVASLEK.V</b>                              |
| <a href="#">271</a>  | 818.5800        | 817.5727         | 817.4658         | 0.1070         | 0        | 28        | 0.32         | 1        | K.TLQISTR.K                                     |
| <a href="#">1513</a> | <b>564.5751</b> | <b>1127.1357</b> | <b>1127.5070</b> | <b>-0.3712</b> | <b>1</b> | <b>20</b> | <b>1.5</b>   | <b>1</b> | <b>K.TWDKYEMR.I</b>                             |
| <a href="#">2766</a> | <b>657.2536</b> | <b>1312.4927</b> | <b>1311.7650</b> | <b>0.7278</b>  | <b>0</b> | <b>66</b> | <b>4e-05</b> | <b>1</b> | <b>R.LIDLAPLPTETVK.Q</b> <a href="#">2764</a>   |
| <a href="#">4172</a> | 734.7001        | 1467.3857        | 1467.8661        | -0.4803        | 1        | 2         | 97           | 9        | K.RLIDLAPLPTETVK.Q                              |
| <a href="#">7078</a> | <b>863.4696</b> | <b>1724.9247</b> | <b>1723.8239</b> | <b>1.1008</b>  | <b>1</b> | <b>10</b> | <b>13</b>    | <b>1</b> | <b>-.MSFQKPEKDFGEGPK.V</b> <a href="#">7062</a> |
| <a href="#">8808</a> | 950.8081        | 1899.6017        | 1897.8628        | 1.7389         | 2        | 2         | 84           | 6        | K.TPNGEGSKTWDKYEMR.I                            |

309. [gi|220696529|gb|EED52871.1|](#) Mass: 8114 Score: 76 Queries matched: 3 emPAI: 1.06

Mitochondrial ATP synthase epsilon chain domain-containing protein [Aspergillus flavus NRRL3357]

| Query                | Observed        | Mr(expt)         | Mr(calc)         | Delta         | Miss     | Score     | Expect         | Rank     | Peptide                                          |
|----------------------|-----------------|------------------|------------------|---------------|----------|-----------|----------------|----------|--------------------------------------------------|
| <a href="#">3851</a> | 716.6331        | 1431.2517        | 1430.7412        | 0.5105        | 2        | 10        | 16             | 4        | R.LAAERRGQMDLR.F                                 |
| <a href="#">5794</a> | <b>813.6756</b> | <b>1625.3367</b> | <b>1623.7852</b> | <b>1.5515</b> | <b>0</b> | <b>77</b> | <b>2.9e-06</b> | <b>1</b> | <b>R.SLGEANQEAAVAHAEK.-</b> <a href="#">5784</a> |

310. [gi|220701312|gb|EED57650.1|](#) Mass: 7717 Score: 76 Queries matched: 10 emPAI: 0.45

Ribosomal protein S28e [Aspergillus flavus NRRL3357]

| Query                 | Observed        | Mr(expt)         | Mr(calc)         | Delta          | Miss     | Score     | Expect         | Rank     | Peptide                                                                       |
|-----------------------|-----------------|------------------|------------------|----------------|----------|-----------|----------------|----------|-------------------------------------------------------------------------------|
| <a href="#">1629</a>  | 571.6441        | 1141.2737        | 1139.7503        | 1.5235         | 2        | 23        | 0.79           | 2        | K.LVKVTRVLGR.T <a href="#">1608</a> <a href="#">1612</a> <a href="#">1628</a> |
| <a href="#">1682</a>  | 578.3381        | 1154.6617        | 1154.7023        | -0.0406        | 2        | 7         | 34             | 7        | M.DSAKAPVKLVK.V                                                               |
| <a href="#">1901</a>  | <b>401.0609</b> | <b>1200.1607</b> | <b>1200.7051</b> | <b>-0.5444</b> | <b>2</b> | <b>12</b> | <b>10</b>      | <b>7</b> | <b>K.VTRVLGRTGSR.G</b>                                                        |
| <a href="#">4132</a>  | <b>732.2561</b> | <b>1462.4977</b> | <b>1460.7181</b> | <b>1.7796</b>  | <b>0</b> | <b>68</b> | <b>2.6e-05</b> | <b>1</b> | <b>R.VDDILCLLESER.E</b> <a href="#">4120</a>                                  |
| <a href="#">12007</a> | 770.6239        | 2308.8497        | 2308.1594        | 0.6903         | 2        | 6         | 31             | 5        | R.GGVTQVRVEFMDDQSRSIIR.N <a href="#">11999</a>                                |

311. [gi|220701329|gb|EED57667.1|](#) Mass: 38755 Score: 75 Queries matched: 7 emPAI: 0.18

3-isopropylmalate dehydrogenase Leu2A [Aspergillus flavus NRRL3357]



| Query                 | Observed  | Mr(expt)  | Mr(calc)  | Delta   | Miss | Score | Expect  | Rank | Peptide                                                       |
|-----------------------|-----------|-----------|-----------|---------|------|-------|---------|------|---------------------------------------------------------------|
| <a href="#">2621</a>  | 648.6471  | 1295.2797 | 1294.7245 | 0.5552  | 0    | 57    | 0.0003  | 1    | K.NADAVLLGAIGGPK.W <a href="#">2631</a>                       |
| <a href="#">5146</a>  | 786.7236  | 1571.4327 | 1570.8315 | 0.6013  | 0    | 44    | 0.0059  | 1    | R.AIEQAVSNVIESGVR.T <a href="#">5126</a> <a href="#">5170</a> |
| <a href="#">11796</a> | 761.5639  | 2281.6697 | 2282.2171 | -0.5474 | 2    | 0     | 1.2e+02 | 5    | R.GVNFNIIRELTGGIYFGERK.E                                      |
| <a href="#">15590</a> | 1019.4132 | 3055.2177 | 3056.7247 | -1.5070 | 2    | 2     | 66      | 2    | K.NADAVLLGAIGGPKWGTGAVRPEQGILKLR.K                            |

312. [gi|215478516|gb|ACJ67040.1|](#) Mass: 13662 Score: 74 Queries matched: 10 emPAI: 0.56

O-methyltransferase [Aspergillus flavus]

| Query                 | Observed | Mr(expt)  | Mr(calc)  | Delta   | Miss | Score | Expect  | Rank | Peptide                                                                                                                     |
|-----------------------|----------|-----------|-----------|---------|------|-------|---------|------|-----------------------------------------------------------------------------------------------------------------------------|
| <a href="#">2285</a>  | 630.7351 | 1259.4557 | 1259.6721 | -0.2164 | 0    | 7     | 34      | 10   | -.VTATGVSEDLLR.R <a href="#">2279</a> <a href="#">2291</a>                                                                  |
| <a href="#">4044</a>  | 726.7251 | 1451.4357 | 1451.6966 | -0.2609 | 0    | 9     | 20      | 7    | R.FDLG  GGTEATKPL.- <a href="#">4031</a> |
| <a href="#">5076</a>  | 783.5086 | 1565.0027 | 1562.7253 | 2.2774  | 0    | 7     | 28      | 1    | K.GLFDYYSTVDEV.R.G                                                                                                          |
| <a href="#">10289</a> | 690.5172 | 2068.5297 | 2066.9585 | 1.5712  | 0    | 41    | 0.011   | 1    | R.FIFEEVAPDQYAHTDASK.M <a href="#">10286</a>                                                                                |
| <a href="#">11043</a> | 725.0985 | 2172.2737 | 2171.1051 | 1.1686  | 0    | 51    | 0.00098 | 1    | K.GKPPSWNVSPFSLAFDPTK.G <a href="#">11051</a>                                                                               |

Proteins matching the same set of peptides:

[gi|215478518|gb|ACJ67041.1|](#) Mass: 13662 Score: 74 Queries matched: 10

O-methyltransferase [Aspergillus flavus]

313. [gi|74273764|gb|ABA01534.1|](#) Mass: 13793 Score: 74 Queries matched: 9 emPAI: 0.56

O-methyltransferase [Aspergillus flavus]

| Query                 | Observed  | Mr(expt)  | Mr(calc)  | Delta   | Miss | Score | Expect  | Rank | Peptide                                                                                                                  |
|-----------------------|-----------|-----------|-----------|---------|------|-------|---------|------|--------------------------------------------------------------------------------------------------------------------------|
| <a href="#">1277</a>  | 1085.4380 | 1084.4307 | 1083.4543 | 0.9764  | 0    | 2     | 1e+02   | 10   | R.FDLG  GGTEEA.- <a href="#">1278</a> |
| <a href="#">5076</a>  | 783.5086  | 1565.0027 | 1562.7253 | 2.2774  | 0    | 7     | 28      | 1    | K.GLFDYYSTVDEV.R.G                                                                                                       |
| <a href="#">7397</a>  | 880.8521  | 1759.6897 | 1758.9363 | 0.7534  | 0    | 2     | 1e+02   | 10   | -.SLDTIVAATGVSEDLLR.R                                                                                                    |
| <a href="#">8963</a>  | 639.3409  | 1915.0007 | 1915.0374 | -0.0367 | 1    | 3     | 74      | 1    | -.SLDTIVAATGVSEDLRR.I                                                                                                    |
| <a href="#">10289</a> | 690.5172  | 2068.5297 | 2066.9585 | 1.5712  | 0    | 41    | 0.011   | 1    | R.FIFEEVAPDQYAHTDASK.M <a href="#">10286</a>                                                                             |
| <a href="#">11043</a> | 725.0985  | 2172.2737 | 2171.1051 | 1.1686  | 0    | 51    | 0.00098 | 1    | K.GKPPSWNVSPFSLAFDPTK.G <a href="#">11051</a>                                                                            |

314. [gi|8308126|gb|AAF74483.1|AF261846\\_1](#) Mass: 9573 Score: 74 Queries matched: 5 emPAI: 0.86

O-methyltransferase [Aspergillus flavus]

| Query                 | Observed | Mr(expt)  | Mr(calc)  | Delta  | Miss | Score | Expect  | Rank | Peptide                                       |
|-----------------------|----------|-----------|-----------|--------|------|-------|---------|------|-----------------------------------------------|
| <a href="#">385</a>   | 431.1001 | 860.1857  | 859.5504  | 0.6353 | 2    | 15    | 6.4     | 6    | -.FRRILR.G                                    |
| <a href="#">10289</a> | 690.5172 | 2068.5297 | 2066.9585 | 1.5712 | 0    | 41    | 0.011   | 1    | R.FIFEEVAPDQYAHTDASK.M <a href="#">10286</a>  |
| <a href="#">11043</a> | 725.0985 | 2172.2737 | 2171.1051 | 1.1686 | 0    | 51    | 0.00098 | 1    | K.GKPPSWNVSPFSLAFDPTK.G <a href="#">11051</a> |

Proteins matching the same set of peptides:

[gi|8308136|gb|AAF74488.1|AF261851\\_1](#) Mass: 9573 Score: 74 Queries matched: 5

## O-methyltransferase [Aspergillus flavus]

315. [gi|74273707|gb|ABA01506.1|](#) Mass: 13859 Score: 74 Queries matched: 8 emPAI: 0.55

## O-methyltransferase [Aspergillus flavus]

| Query                 | Observed | Mr(expt)  | Mr(calc)  | Delta   | Miss | Score | Expect  | Rank | Peptide                                       |
|-----------------------|----------|-----------|-----------|---------|------|-------|---------|------|-----------------------------------------------|
| <a href="#">1570</a>  | 567.4776 | 1132.9407 | 1133.4812 | -0.5404 | 0    | 2     | 1.2e+02 | 7    | R.FDLGMSGTEAH.-                               |
| <a href="#">5076</a>  | 783.5086 | 1565.0027 | 1562.7253 | 2.2774  | 0    | 7     | 28      | 1    | K.GLFDYYSTVDEV.R.G                            |
| <a href="#">7397</a>  | 880.8521 | 1759.6897 | 1758.9363 | 0.7534  | 0    | 2     | 1e+02   | 10   | -.SLDTIVAATGVSEDLR.R                          |
| <a href="#">8963</a>  | 639.3409 | 1915.0007 | 1915.0374 | -0.0367 | 1    | 3     | 74      | 1    | -.SLDTIVAATGVSEDLRR.I                         |
| <a href="#">10289</a> | 690.5172 | 2068.5297 | 2066.9585 | 1.5712  | 0    | 41    | 0.011   | 1    | R.FIFEEVAPDQYAHTDASK.M <a href="#">10286</a>  |
| <a href="#">11043</a> | 725.0985 | 2172.2737 | 2171.1051 | 1.1686  | 0    | 51    | 0.00098 | 1    | K.GKPPSWNVSPFSLAFDPTK.G <a href="#">11051</a> |

316. [gi|74273732|gb|ABA01518.1|](#) Mass: 14035 Score: 74 Queries matched: 8 emPAI: 0.55

## O-methyltransferase [Aspergillus flavus]

| Query                 | Observed | Mr(expt)  | Mr(calc)  | Delta   | Miss | Score | Expect  | Rank | Peptide                                       |
|-----------------------|----------|-----------|-----------|---------|------|-------|---------|------|-----------------------------------------------|
| <a href="#">4402</a>  | 748.1041 | 1494.1937 | 1494.7137 | -0.5200 | 1    | 1     | 1.2e+02 | 2    | R.RFDLGMGGTEATKP.-                            |
| <a href="#">5076</a>  | 783.5086 | 1565.0027 | 1562.7253 | 2.2774  | 0    | 7     | 28      | 1    | K.GLFDYYSTVDEV.R.G                            |
| <a href="#">7397</a>  | 880.8521 | 1759.6897 | 1758.9363 | 0.7534  | 0    | 2     | 1e+02   | 10   | -.SLDTIVAATGVSEDLR.R                          |
| <a href="#">8963</a>  | 639.3409 | 1915.0007 | 1915.0374 | -0.0367 | 1    | 3     | 74      | 1    | -.SLDTIVAATGVSEDLRR.I                         |
| <a href="#">10289</a> | 690.5172 | 2068.5297 | 2066.9585 | 1.5712  | 0    | 41    | 0.011   | 1    | R.FIFEEVAPDQYAHTDASK.M <a href="#">10286</a>  |
| <a href="#">11043</a> | 725.0985 | 2172.2737 | 2171.1051 | 1.1686  | 0    | 51    | 0.00098 | 1    | K.GKPPSWNVSPFSLAFDPTK.G <a href="#">11051</a> |

317. [gi|114384135|gb|ABI73969.1|](#) Mass: 11812 Score: 74 Queries matched: 5 emPAI: 0.67

## O-methyltransferase [Aspergillus flavus]

| Query                 | Observed | Mr(expt)  | Mr(calc)  | Delta  | Miss | Score | Expect  | Rank | Peptide                                       |
|-----------------------|----------|-----------|-----------|--------|------|-------|---------|------|-----------------------------------------------|
| <a href="#">10289</a> | 690.5172 | 2068.5297 | 2066.9585 | 1.5712 | 0    | 41    | 0.011   | 1    | R.FIFEEVAPDQYAHTDASK.M <a href="#">10286</a>  |
| <a href="#">11043</a> | 725.0985 | 2172.2737 | 2171.1051 | 1.1686 | 0    | 51    | 0.00098 | 1    | K.GKPPSWNVSPFSLAFDPTK.G <a href="#">11051</a> |
| <a href="#">12195</a> | 779.2862 | 2334.8367 | 2333.3001 | 1.5366 | 2    | 3     | 61      | 1    | -.HSIPMVAATGVSEDLRRILR.G                      |

318. [gi|8308140|gb|AAF74490.1|AF261853\\_1](#) Mass: 9540 Score: 74 Queries matched: 8 emPAI: 0.86

## O-methyltransferase [Aspergillus flavus]

| Query                 | Observed | Mr(expt)  | Mr(calc)  | Delta   | Miss | Score | Expect  | Rank | Peptide                                        |
|-----------------------|----------|-----------|-----------|---------|------|-------|---------|------|------------------------------------------------|
| <a href="#">10289</a> | 690.5172 | 2068.5297 | 2066.9585 | 1.5712  | 0    | 41    | 0.011   | 1    | R.FIFEEVAPDQYAHTDASK.M <a href="#">10286</a>   |
| <a href="#">11043</a> | 725.0985 | 2172.2737 | 2171.1051 | 1.1686  | 0    | 51    | 0.00098 | 1    | K.GKPPSWNVSPFSLAFDPTK.G <a href="#">11051</a>  |
| <a href="#">11456</a> | 743.8942 | 2228.6607 | 2228.1378 | 0.5229  | 0    | 1     | 1.1e+02 | 5    | K.GKPPSWNRSPFSLAFDPTK.G                        |
| <a href="#">12184</a> | 778.1952 | 2331.5637 | 2329.1743 | 2.3894  | 1    | 4     | 46      | 2    | K.GKPPSWNSPFSLAFDPTKGL.- <a href="#">12167</a> |
| <a href="#">12325</a> | 786.7235 | 2357.1487 | 2357.1692 | -0.0205 | 1    | 1     | 1e+02   | 10   | K.GKPPSWNDSPFSLAFDPTKGL.-                      |

319. [gi|2815742|gb|AAC01647.1|](#) Mass: 9231 Score: 74 Queries matched: 5 emPAI: 0.90

O-methyltransferase [Aspergillus flavus]

| Query                 | Observed  | Mr(expt)  | Mr(calc)  | Delta  | Miss | Score | Expect  | Rank | Peptide                                       |
|-----------------------|-----------|-----------|-----------|--------|------|-------|---------|------|-----------------------------------------------|
| <a href="#">10289</a> | 690.5172  | 2068.5297 | 2066.9585 | 1.5712 | 0    | 41    | 0.011   | 1    | R.FIFEEVAPDQYAHTDASK.M <a href="#">10286</a>  |
| <a href="#">11043</a> | 725.0985  | 2172.2737 | 2171.1051 | 1.1686 | 0    | 51    | 0.00098 | 1    | K.GKPPSWNVSPFSLAFDPTK.G <a href="#">11051</a> |
| <a href="#">16189</a> | 1117.7632 | 3350.2677 | 3347.6067 | 2.6610 | 1    | 2     |         | 55   | R.VTGIHALVGFSCDEAMRSAAYFSNFLQQT.K.G           |

Proteins matching the same set of peptides:

[gi|2815762|gb|AAC01657.1|](#) Mass: 9231 Score: 74 Queries matched: 5

O-methyltransferase [Aspergillus flavus]

320. [gi|15193503|gb|AAF74494.2|AF261857\\_1](#) Mass: 9412 Score: 74 Queries matched: 5 emPAI: 0.87

O-methyltransferase [Aspergillus flavus]

| Query                 | Observed | Mr(expt)  | Mr(calc)  | Delta   | Miss | Score | Expect  | Rank | Peptide                                       |
|-----------------------|----------|-----------|-----------|---------|------|-------|---------|------|-----------------------------------------------|
| <a href="#">10289</a> | 690.5172 | 2068.5297 | 2066.9585 | 1.5712  | 0    | 41    | 0.011   | 1    | R.FIFEEVAPDQYAHTDASK.M <a href="#">10286</a>  |
| <a href="#">10685</a> | 709.3819 | 2125.1237 | 2127.0789 | -1.9552 | 0    | 2     |         | 78   | K.GKPPSWNVSPFSLAFDPGK.G                       |
| <a href="#">11043</a> | 725.0985 | 2172.2737 | 2171.1051 | 1.1686  | 0    | 51    | 0.00098 | 1    | K.GKPPSWNVSPFSLAFDPTK.G <a href="#">11051</a> |

321. [gi|220699478|gb|EED55817.1|](#) Mass: 41060 Score: 74 Queries matched: 13 emPAI: 0.08

saccharopine dehydrogenase Lys1, putative [Aspergillus flavus NRRL3357]

| Query                 | Observed  | Mr(expt)  | Mr(calc)  | Delta   | Miss | Score | Expect  | Rank | Peptide                                     |                                                 |
|-----------------------|-----------|-----------|-----------|---------|------|-------|---------|------|---------------------------------------------|-------------------------------------------------|
| <a href="#">544</a>   | 456.5946  | 911.1747  | 910.5964  | 0.5783  | 0    | 16    |         | 3.5  | 2                                           | K.ILVIGALGR.C <a href="#">545</a>               |
| <a href="#">1434</a>  | 557.6711  | 1113.3277 | 1112.5026 | 0.8251  | 0    | 27    |         | 0.36 | 1                                           | R.IFDDEEFAK.I                                   |
| <a href="#">1966</a>  | 607.2381  | 1212.4617 | 1212.6350 | -0.1733 | 0    | 11    |         | 11   | 10                                          | K.DVGIPESDIIR.W                                 |
| <a href="#">2553</a>  | 430.1452  | 1287.4137 | 1288.7027 | -1.2890 | 1    | 7     |         | 30   | 9                                           | K.DAPKDAYVLGLK.E <a href="#">2551</a>           |
| <a href="#">7479</a>  | 884.6261  | 1767.2377 | 1766.9203 | 0.3175  | 1    | 14    |         | 5.3  | 3                                           | K.IGAPLVEEGSWAKDAPK.D <a href="#">7486</a>      |
| <a href="#">9226</a>  | 650.8025  | 1949.3857 | 1947.0062 | 2.3796  | 1    | 10    |         | 14   | 3                                           | R.GGGTLLDLEFLTDEVGRR.V                          |
| <a href="#">9806</a>  | 1011.9201 | 2021.8257 | 2020.0550 | 1.7707  | 0    | 54    | 0.00047 | 1    | R.ESSEMFSQALLPSSLQLK.N <a href="#">9795</a> |                                                 |
| <a href="#">12882</a> | 813.2665  | 2436.7777 | 2434.2889 | 2.4888  | 2    | 10    |         | 12   | 2                                           | R.ESSEMFSQALLPSSLQLKNRK.D <a href="#">12873</a> |

322. [gi|220690500|gb|EED46849.1|](#) Mass: 42759 Score: 74 Queries matched: 16 emPAI: 0.16

acyl-CoA dehydrogenase family protein [Aspergillus flavus NRRL3357]

| Query                | Observed  | Mr(expt)  | Mr(calc)  | Delta   | Miss | Score | Expect  | Rank | Peptide           |                                       |
|----------------------|-----------|-----------|-----------|---------|------|-------|---------|------|-------------------|---------------------------------------|
| <a href="#">1288</a> | 1086.6920 | 1085.6847 | 1085.5249 | 0.1598  | 0    | 4     |         | 80   | 8                 | R.CSIYLVMGK.S                         |
| <a href="#">2129</a> | 620.6991  | 1239.3837 | 1238.6983 | 0.6854  | 0    | 42    |         | 0.01 | 1                 | R.VPVSNIVLGEGR.G <a href="#">2127</a> |
| <a href="#">2356</a> | 423.0459  | 1266.1157 | 1267.6925 | -1.5767 | 0    | 6     |         | 34   | 6                 | K.QQWLAPLLDGK.I <a href="#">2357</a>  |
| <a href="#">3231</a> | 681.6271  | 1361.2397 | 1360.6962 | 0.5436  | 0    | 0     | 1.5e+02 |      | 4                 | R.QQGLWNMFLPK.N                       |
| <a href="#">3774</a> | 713.3186  | 1424.6227 | 1423.8399 | 0.7829  | 0    | 43    | 0.0073  | 1    | K.VLVPQTALTVIDR.A |                                       |
| <a href="#">3897</a> | 719.3581  | 1436.7017 | 1433.7561 | 2.9456  | 1    | 10    |         | 16   | 4                 | R.IHHAMRTIGAAEK.A                     |

|                       |           |           |           |         |   |    |    |    |                                                         |
|-----------------------|-----------|-----------|-----------|---------|---|----|----|----|---------------------------------------------------------|
| <a href="#">4810</a>  | 770.9481  | 1539.8817 | 1538.8457 | 1.0361  | 0 | 11 | 11 | 1  | <a href="#">K.SLSSHGIVLEWLAK.S</a> <a href="#">4796</a> |
| <a href="#">10206</a> | 1031.2446 | 2060.4747 | 2058.0534 | 2.4213  | 1 | 5  | 46 | 2  | <a href="#">K.YGNEAQKQWLAPLLDGK.I</a>                   |
| <a href="#">11575</a> | 750.4735  | 2248.3987 | 2246.0215 | 2.3772  | 0 | 5  | 38 | 10 | <a href="#">R.MLSVYGYDDAPHGHGHISFK.D</a>                |
| <a href="#">12285</a> | 784.0412  | 2349.1017 | 2347.1325 | 1.9692  | 1 | 1  | 92 | 2  | <a href="#">K.SKLASEATNNAAPDTGNMEVLAK.Y</a>             |
| <a href="#">12620</a> | 801.7685  | 2402.2837 | 2402.3004 | -0.0167 | 2 | 2  | 76 | 8  | <a href="#">R.IHHAMRTIGAAEKAIEWLIAR.I</a>               |
| <a href="#">13405</a> | 836.9339  | 2507.7797 | 2509.3765 | -1.5968 | 2 | 2  | 79 | 3  | <a href="#">K.DVRVPVSNIVLGEGRGFEEIIQGR.L</a>            |
| <a href="#">14453</a> | 894.1232  | 2679.3477 | 2678.3333 | 1.0144  | 1 | 3  | 54 | 9  | <a href="#">R.SAFLMTEPEVASSDATNIQLNIRR.E</a>            |

323. [gi|220690752|gb|EED47101.1|](#) Mass: 27493 Score: 71 Queries matched: 8 emPAI: 0.12

class II aldolase/adducin domain protein [Aspergillus flavus NRRL3357]

| Query                 | Observed  | Mr(expt)  | Mr(calc)  | Delta   | Miss | Score | Expect  | Rank | Peptide                                                                                                 |
|-----------------------|-----------|-----------|-----------|---------|------|-------|---------|------|---------------------------------------------------------------------------------------------------------|
| <a href="#">4835</a>  | 771.8131  | 1541.6117 | 1541.8024 | -0.1907 | 2    | 2     | 1e+02   | 5    | <a href="#">R.GKGKGM_LGFFDTLR.I</a>                                                                     |
| <a href="#">10056</a> | 1023.2266 | 2044.4387 | 2046.0860 | -1.6472 | 0    | 7     | 24      | 3    | <a href="#">K.ELMKPENIFVLQFPTPK.Y</a> <a href="#">10063</a> <a href="#">10072</a> <a href="#">10094</a> |
| <a href="#">10633</a> | 1060.1936 | 2118.3727 | 2118.0732 | 0.2995  | 0    | 71    | 9.7e-06 | 1    | <a href="#">R.IPIIENTAFEE_DLTGSLEK.A</a> <a href="#">10632</a>                                          |
| <a href="#">16010</a> | 1090.9755 | 3269.9047 | 3271.6322 | -1.7275 | 1    | 1     | 70      | 3    | <a href="#">K.GMLGFFDTLRIP_IIENTAFEE_DLTGSLEK.A</a>                                                     |

324. [gi|220695921|gb|EED52263.1|](#) Mass: 32977 Score: 71 Queries matched: 14 emPAI: 0.21

NADH-cytochrome B5 reductase, putative [Aspergillus flavus NRRL3357]

| Query                 | Observed | Mr(expt)  | Mr(calc)  | Delta   | Miss | Score | Expect  | Rank | Peptide                                                                                                                                      |
|-----------------------|----------|-----------|-----------|---------|------|-------|---------|------|----------------------------------------------------------------------------------------------------------------------------------------------|
| <a href="#">1716</a>  | 582.6291 | 1163.2437 | 1162.5659 | 0.6779  | 0    | 50    | 0.0015  | 1    | <a href="#">R.FEYVYTVSR.L</a> <a href="#">1717</a>                                                                                           |
| <a href="#">2697</a>  | 652.7286 | 1303.4427 | 1302.7408 | 0.7019  | 2    | 29    | 0.21    | 2    | <a href="#">K.RGILDR_LGF_EK.G</a> <a href="#">2685</a> <a href="#">2698</a>                                                                  |
| <a href="#">4367</a>  | 497.6335 | 1489.8787 | 1490.7994 | -0.9207 | 2    | 6     | 44      | 10   | <a href="#">K.RLVFEFPDKNAR.S</a>                                                                                                             |
| <a href="#">5498</a>  | 802.3496 | 1602.6847 | 1601.8777 | 0.8070  | 0    | 26    | 0.36    | 1    | <a href="#">K.LVFGVNSEQD_LLLR.E</a> <a href="#">5457</a> <a href="#">5487</a> <a href="#">5488</a> <a href="#">5502</a> <a href="#">5510</a> |
| <a href="#">8251</a>  | 614.8089 | 1841.4047 | 1843.0567 | -1.6520 | 1    | 4     | 58      | 10   | <a href="#">K.IKLVFGVNSEQD_LLLR.E</a>                                                                                                        |
| <a href="#">10835</a> | 716.0252 | 2145.0537 | 2146.1647 | -1.1110 | 2    | 1     | 1.1e+02 | 5    | <a href="#">K.FGFTTLRVQSVKAVNHNTK.R</a>                                                                                                      |

325. [gi|220692391|gb|EED48738.1|](#) Mass: 77184 Score: 71 Queries matched: 9 emPAI: 0.04

NADH-ubiquinone oxidoreductase 64 kDa subunit, putative [Aspergillus flavus NRRL3357]

| Query                 | Observed  | Mr(expt)  | Mr(calc)  | Delta   | Miss | Score | Expect | Rank | Peptide                                                                    |
|-----------------------|-----------|-----------|-----------|---------|------|-------|--------|------|----------------------------------------------------------------------------|
| <a href="#">1374</a>  | 552.1451  | 1102.2757 | 1102.5560 | -0.2802 | 1    | 3     | 1e+02  | 8    | <a href="#">K.SSFRNAFFK.T</a>                                              |
| <a href="#">3631</a>  | 702.6071  | 1403.1997 | 1400.7299 | 2.4698  | 2    | 4     | 70     | 3    | <a href="#">R.TIAWEKGDPEK.L</a> <a href="#">3628</a>                       |
| <a href="#">7501</a>  | 590.6262  | 1768.8567 | 1765.9435 | 2.9132  | 2    | 6     | 38     | 6    | <a href="#">R.DHVDVLTNSRVKEVR.D</a>                                        |
| <a href="#">8450</a>  | 930.8016  | 1859.5887 | 1859.0047 | 0.5840  | 1    | 4     | 57     | 10   | <a href="#">-MSTVLLRSRPDQTALR.R</a>                                        |
| <a href="#">9217</a>  | 650.4802  | 1948.4187 | 1947.9976 | 0.4212  | 1    | 9     | 16     | 1    | <a href="#">R.DDKVVFTQMEDGKPV_LK.E</a>                                     |
| <a href="#">12263</a> | 783.1652  | 2346.4737 | 2348.0624 | -1.5887 | 0    | 5     | 38     | 4    | <a href="#">K.NQVLENMELACLPTTSDEER.K</a>                                   |
| <a href="#">16124</a> | 1106.3775 | 3316.1107 | 3313.6765 | 2.4342  | 0    | 49    | 0.0011 | 1    | <a href="#">R.LIGAP_LGDVYAIGDCSTVQNNVADHIVSFLR.T</a> <a href="#">16120</a> |

326. [gi|220689379|gb|EED45730.1|](#) Mass: 26068 Score: 71 Queries matched: 11 emPAI: 0.27

ubiquinol-cytochrome c reductase iron-sulfur subunit precursor [Aspergillus flavus NRRL3357]

| Query                 | Observed  | Mr(expt)  | Mr(calc)  | Delta   | Miss | Score | Expect  | Rank | Peptide                                                                                        |
|-----------------------|-----------|-----------|-----------|---------|------|-------|---------|------|------------------------------------------------------------------------------------------------|
| <a href="#">1963</a>  | 607.1486  | 1212.2827 | 1211.6761 | 0.6066  | 0    | 70    | 1.6e-05 | 1    | K.VEIGLASIPEGK.N                                                                               |
| <a href="#">2225</a>  | 418.1959  | 1251.5657 | 1251.6493 | -0.0835 | 0    | 11    |         | 11   | -.MSLSSASSTLLR.A                                                                               |
| <a href="#">2364</a>  | 634.7366  | 1267.4587 | 1267.6442 | -0.1855 | 0    | (3)   |         | 68   | -.MSLSSASSTLLR.A                                                                               |
| <a href="#">7644</a>  | 890.8326  | 1779.6507 | 1779.0506 | 0.6002  | 1    | 5     |         | 43   | K.VEIGLASIPEGKNVVIK.W                                                                          |
| <a href="#">10064</a> | 682.7379  | 2045.1917 | 2045.9654 | -0.7737 | 0    | 2     |         | 84   | R.TQDEINEANSIEWQTLR.D <a href="#">10080</a>                                                    |
| <a href="#">13494</a> | 841.1462  | 2520.4167 | 2520.2900 | 0.1267  | 2    | 1     |         | 83   | -.MSLSSASSTLLRACARQQLPTR.A                                                                     |
| <a href="#">13844</a> | 1286.2921 | 2570.5697 | 2570.3268 | 0.2429  | 1    | 34    | 0.05    | 1    | R.KGPAPLNLEVPQYSFPDESTLVIG.- <a href="#">13845</a> <a href="#">13855</a> <a href="#">13860</a> |

327. [gi|220695252|gb|EED51595.1|](#) Mass: 49674 Score: 71 Queries matched: 14 emPAI: 0.07

GTP cyclohydrolase II, putative [Aspergillus flavus NRRL3357]

| Query                 | Observed | Mr(expt)  | Mr(calc)  | Delta   | Miss | Score | Expect  | Rank | Peptide                                  |
|-----------------------|----------|-----------|-----------|---------|------|-------|---------|------|------------------------------------------|
| <a href="#">685</a>   | 480.4011 | 958.7877  | 956.5291  | 2.2587  | 0    | 4     |         | 75   | K.LAEIGEAVR.D                            |
| <a href="#">1888</a>  | 599.7531 | 1197.4917 | 1198.7033 | -1.2116 | 2    | 2     | 1.1e+02 | 3    | R.KEGRALGEVIK.Y                          |
| <a href="#">2714</a>  | 654.2921 | 1306.5697 | 1307.7925 | -1.2228 | 1    | 2     | 1.1e+02 | 9    | R.GPVVVSRSGLLKR.R                        |
| <a href="#">3024</a>  | 671.2081 | 1340.4017 | 1339.6329 | 0.7688  | 0    | 7     |         | 31   | R.QYTMEELAEVK.G                          |
| <a href="#">3034</a>  | 671.7101 | 1341.4057 | 1340.6250 | 0.7807  | 1    | 4     |         | 64   | K.IDRMLSMSNMK.H                          |
| <a href="#">4460</a>  | 752.0026 | 1501.9907 | 1500.7098 | 1.2809  | 2    | 0     | 1.6e+02 | 5    | K.KIDRMLSMSNMK.H                         |
| <a href="#">5224</a>  | 790.8886 | 1579.7627 | 1577.8889 | 1.8738  | 1    | 1     | 1.3e+02 | 7    | K.HDAIVQSGIKILER.V                       |
| <a href="#">5788</a>  | 813.3336 | 1624.6527 | 1623.8369 | 0.8158  | 1    | 0     | 1.4e+02 | 8    | R.EAQNGGSGVVIYFRK.E                      |
| <a href="#">6391</a>  | 836.5536 | 1671.0927 | 1669.8828 | 1.2099  | 0    | 71    | 1.2e-05 | 1    | K.VAVEPVWYLPGVADR.F                      |
| <a href="#">8152</a>  | 610.1735 | 1827.4987 | 1827.9050 | -0.4063 | 2    | 3     |         | 66   | K.YFTRTENIAGVRDMR.F <a href="#">8146</a> |
| <a href="#">11126</a> | 729.6655 | 2185.9747 | 2183.1384 | 2.8364  | 1    | 4     |         | 48   | R.DMRFQALMPDILHWLGK.K                    |
| <a href="#">12444</a> | 792.8735 | 2375.5987 | 2373.1967 | 2.4021  | 2    | 3     |         | 54   | K.IDRMLSMSNMKHDAIVQSGIK.I                |
| <a href="#">13614</a> | 844.8349 | 2531.4827 | 2532.2862 | -0.8035 | 2    | 0     | 1e+02   | 6    | R.MLSMSNMKHDAIVQSGIKILER.V               |

328. [gi|220688981|gb|EED45333.1|](#) Mass: 89255 Score: 71 Queries matched: 19 emPAI: 0.04

U5 snRNP component Snull4, putative [Aspergillus flavus NRRL3357]

| Query                | Observed | Mr(expt)  | Mr(calc)  | Delta   | Miss | Score | Expect  | Rank | Peptide                                                                  |
|----------------------|----------|-----------|-----------|---------|------|-------|---------|------|--------------------------------------------------------------------------|
| <a href="#">107</a>  | 720.8230 | 719.8157  | 719.3636  | 0.4521  | 0    | 3     |         | 97   | K.MLDGLR.K                                                               |
| <a href="#">737</a>  | 485.5646 | 969.1147  | 968.5403  | 0.5744  | 0    | 60    | 0.00017 | 1    | R.GGQIIPTR.R <a href="#">732</a> <a href="#">734</a> <a href="#">735</a> |
| <a href="#">1296</a> | 544.7286 | 1087.4427 | 1088.5655 | -1.1227 | 0    | 1     | 1.6e+02 | 5    | K.FLEPELWR.G                                                             |
| <a href="#">1543</a> | 565.9231 | 1129.8317 | 1129.6529 | 0.1788  | 1    | (5)   |         | 55   | K.MDRLILELK.I                                                            |
| <a href="#">1651</a> | 574.1791 | 1146.3437 | 1145.6478 | 0.6959  | 1    | 8     |         | 29   | K.MDRLILELK.I <a href="#">1648</a>                                       |
| <a href="#">4044</a> | 726.7251 | 1451.4357 | 1451.7198 | -0.2840 | 0    | 13    | 7.9     | 1    | R.LWGDIFNPTSR.K                                                          |
| <a href="#">4393</a> | 747.5546 | 1493.0947 | 1491.7933 | 1.3014  | 0    | 3     |         | 74   | R.LTDVSLADQVIYR.G                                                        |
| <a href="#">7630</a> | 593.9559 | 1778.8457 | 1777.9251 | 0.9207  | 0    | 7     |         | 32   | R.GLIPVIDSFGFETDLR.I                                                     |
| <a href="#">9557</a> | 664.6769 | 1991.0087 | 1992.1367 | -1.1280 | 1    | 2     |         | 88   | R.TLASVGIHLKPSQLKSDAK.E                                                  |

|                       |                 |                  |                  |               |          |          |           |          |                                                                               |
|-----------------------|-----------------|------------------|------------------|---------------|----------|----------|-----------|----------|-------------------------------------------------------------------------------|
| <a href="#">11288</a> | 736.2815        | 2205.8227        | 2207.1984        | -1.3756       | 2        | 1        | 1.1e+02   | 7        | K.VAVEPVPNPSELPKMLDGLRK.V                                                     |
| <a href="#">12444</a> | 792.8735        | 2375.5987        | 2374.1573        | 1.4414        | 1        | 1        | 99        | 9        | K.NKITMIAEPLDDGIAEDIESGK.V                                                    |
| <a href="#">12925</a> | <b>815.4549</b> | <b>2443.3427</b> | <b>2442.3231</b> | <b>1.0197</b> | <b>1</b> | <b>6</b> | <b>30</b> | <b>1</b> | <b>R.LTDVSLADQVIYRGGGQIIPAR.R</b> <a href="#">12909</a> <a href="#">12927</a> |
| <a href="#">15521</a> | 1013.2752       | 3036.8037        | 3038.5569        | -1.7532       | 2        | 1        | 74        | 8        | R.HMTESVFKVAVEPVPNPSELPKMLDGLR.K                                              |

329. [gi|220701581|gb|EED57919.1|](#) Mass: 31235 Score: 70 Queries matched: 5 emPAI: 0.22

proteasome regulatory particle subunit (RpnL), putative [Aspergillus flavus NRRL3357]

| Query                 | Observed        | Mr(expt)         | Mr(calc)         | Delta         | Miss     | Score     | Expect       | Rank     | Peptide                               |
|-----------------------|-----------------|------------------|------------------|---------------|----------|-----------|--------------|----------|---------------------------------------|
| <a href="#">3303</a>  | 457.0392        | 1368.0957        | 1365.7364        | 2.3593        | 0        | 10        | 14           | 3        | R.TLVSELHNALNR.K <a href="#">3295</a> |
| <a href="#">9232</a>  | <b>975.9801</b> | <b>1949.9457</b> | <b>1949.0258</b> | <b>0.9199</b> | <b>0</b> | <b>71</b> | <b>1e-05</b> | <b>1</b> | <b>R.VPSEDFGLFSNVLVGTIR.S</b>         |
| <a href="#">11160</a> | 731.1192        | 2190.3357        | 2191.1821        | -0.8464       | 2        | 3         | 67           | 9        | M.ANGADLRTLVLSELHNALNRK.Q             |
| <a href="#">12777</a> | <b>808.7585</b> | <b>2423.2537</b> | <b>2421.3842</b> | <b>1.8695</b> | <b>0</b> | <b>18</b> | <b>1.9</b>   | <b>1</b> | <b>R.TLLLQNALIPTSTSPELIALAR.E</b>     |

330. [gi|220689713|gb|EED46063.1|](#) Mass: 81215 Score: 70 Queries matched: 30 emPAI: 0.04

dynamain family GTPase, putative [Aspergillus flavus NRRL3357]

| Query                 | Observed        | Mr(expt)         | Mr(calc)         | Delta          | Miss     | Score      | Expect         | Rank      | Peptide                                                                        |
|-----------------------|-----------------|------------------|------------------|----------------|----------|------------|----------------|-----------|--------------------------------------------------------------------------------|
| <a href="#">228</a>   | 793.4880        | 792.4807         | 792.3800         | 0.1008         | 0        | 15         | 5.3            | 4         | K.MAEGTLR.G <a href="#">229</a>                                                |
| <a href="#">1796</a>  | 393.6009        | 1177.7807        | 1179.5778        | -1.7971        | 2        | 9          | 23             | 5         | K.RMGESRTTAR.A                                                                 |
| <a href="#">1913</a>  | <b>602.8286</b> | <b>1203.6427</b> | <b>1203.5852</b> | <b>0.0575</b>  | <b>1</b> | <b>(5)</b> | <b>53</b>      | <b>7</b>  | <b>K.CPMRIVSADR.F</b>                                                          |
| <a href="#">2007</a>  | 611.0676        | 1220.1207        | 1219.5802        | 0.5406         | 1        | 7          | 39             | 3         | K.CPMRIVSADR.F <a href="#">2010</a> <a href="#">2015</a>                       |
| <a href="#">4323</a>  | <b>495.6115</b> | <b>1483.8127</b> | <b>1483.6799</b> | <b>0.1328</b>  | <b>0</b> | <b>8</b>   | <b>22</b>      | <b>10</b> | <b>R.FIDNVAMQVMER.H</b> <a href="#">4322</a> <a href="#">4333</a>              |
| <a href="#">6505</a>  | 560.9172        | 1679.7297        | 1678.8335        | 0.8962         | 1        | 6          | 40             | 5         | K.KELTSEVMEEIIDK.A <a href="#">6520</a>                                        |
| <a href="#">6754</a>  | 566.6855        | 1697.0347        | 1698.9417        | -1.9070        | 0        | 3          | 78             | 10        | K.EIPHIITEITQHLR.E                                                             |
| <a href="#">7475</a>  | <b>589.8865</b> | <b>1766.6377</b> | <b>1766.8734</b> | <b>-0.2356</b> | <b>1</b> | <b>28</b>  | <b>0.22</b>    | <b>1</b>  | <b>R.GQHQDIPSTDAKAMLR.Y</b> <a href="#">7501</a>                               |
| <a href="#">7557</a>  | 591.8915        | 1772.6527        | 1770.8546        | 1.7982         | 1        | 4          | 64             | 4         | K.DTMCTRFPIQISFR.Q                                                             |
| <a href="#">8173</a>  | 916.7461        | 1831.4777        | 1831.0163        | 0.4614         | 2        | 2          | 97             | 8         | K.STKQLTSLDATLRIER.S                                                           |
| <a href="#">9125</a>  | 646.2249        | 1935.6527        | 1937.0370        | -1.3843        | 2        | 0          | 1.3e+02        | 7         | R.SLPGSVHPDVEEKLFRK.L                                                          |
| <a href="#">12782</a> | <b>808.9542</b> | <b>2423.8407</b> | <b>2422.1522</b> | <b>1.6886</b>  | <b>2</b> | <b>0</b>   | <b>1.1e+02</b> | <b>6</b>  | <b>R.TTARAQRYVVLQFCNEMQK.M</b>                                                 |
| <a href="#">13167</a> | 826.3685        | 2476.0837        | 2476.3545        | -0.2708        | 2        | 3          | 62             | 4         | K.IMVTDCYNILLKIAIPNSKVR.L <a href="#">13173</a>                                |
| <a href="#">13377</a> | <b>835.9322</b> | <b>2504.7747</b> | <b>2504.2217</b> | <b>0.5530</b>  | <b>0</b> | <b>55</b>  | <b>0.00041</b> | <b>1</b>  | <b>R.NPSLLSFTSMTDEILLGHSSNNK.A</b> <a href="#">13375</a> <a href="#">13396</a> |
| <a href="#">13784</a> | 853.8102        | 2558.4087        | 2557.2377        | 1.1710         | 2        | 1          | 1e+02          | 7         | K.MAEGTLRGQHQDIPSTDAKAMLR.Y                                                    |
| <a href="#">14129</a> | 877.7735        | 2630.2987        | 2627.2957        | 3.0030         | 2        | 3          | 59             | 3         | R.FIDNVAMQVMERHVLGPKCPMR.I                                                     |
| <a href="#">15013</a> | <b>938.9609</b> | <b>2813.8607</b> | <b>2812.3510</b> | <b>1.5097</b>  | <b>2</b> | <b>8</b>   | <b>17</b>      | <b>1</b>  | <b>K.KELTSEVMEEIIDKATECIFGDQK.S</b>                                            |
| <a href="#">16380</a> | 1156.4262       | 3466.2567        | 3464.7373        | 1.5194         | 2        | 3          | 39             | 3         | R.LDGYDIALWRFIDNVAMQVMERHVLGPK.C <a href="#">16377</a> <a href="#">16382</a>   |

331. [gi|220695044|gb|EED51387.1|](#) Mass: 16084 Score: 70 Queries matched: 2 emPAI: 0.21

NADH-ubiquinone oxidoreductase subunit B17.2, putative [Aspergillus flavus NRRL3357]

| Query                | Observed        | Mr(expt)         | Mr(calc)         | Delta         | Miss     | Score     | Expect        | Rank     | Peptide                                     |
|----------------------|-----------------|------------------|------------------|---------------|----------|-----------|---------------|----------|---------------------------------------------|
| <a href="#">2075</a> | <b>617.3591</b> | <b>1232.7037</b> | <b>1231.5986</b> | <b>1.1052</b> | <b>0</b> | <b>53</b> | <b>0.0008</b> | <b>1</b> | <b>K.YSAWDPVAAPR.N</b> <a href="#">2074</a> |



332. [gi|220697363|gb|EED53704.1|](#) Mass: 34947 Score: 69 Queries matched: 5 emPAI: 0.09

possible apospory-associated protein c [Aspergillus flavus NRRL3357]

| Query                 | Observed | Mr(expt)  | Mr(calc)  | Delta   | Miss | Score | Expect  | Rank | Peptide                     |
|-----------------------|----------|-----------|-----------|---------|------|-------|---------|------|-----------------------------|
| <a href="#">1162</a>  | 532.6421 | 1063.2697 | 1064.5098 | -1.2401 | 1    | 10    | 19      | 2    | K.SSSESLGKDR.S              |
| <a href="#">2277</a>  | 630.3346 | 1258.6547 | 1257.5336 | 1.1211  | 0    | 2     | 1.3e+02 | 3    | K.GMADFGPGEAYK.N            |
| <a href="#">4043</a>  | 484.7652 | 1451.2737 | 1449.7100 | 1.5638  | 1    | 5     | 44      | 8    | K.ETDRVYQSLDPK.V            |
| <a href="#">10057</a> | 682.5445 | 2044.6117 | 2044.1205 | 0.4913  | 0    | 69    | 1.7e-05 | 1    | K.VPIIVSSASDDKPIFSITR.E     |
| <a href="#">12292</a> | 784.3982 | 2350.1727 | 2349.2764 | 0.8963  | 1    | 5     | 37      | 2    | M.DRSNKPSAIGVGASVPQPTISLR.D |

333. [gi|220692698|gb|EED49044.1|](#) Mass: 17830 Score: 69 Queries matched: 8 emPAI: 0.19

60S ribosomal protein L24a [Aspergillus flavus NRRL3357]

| Query                | Observed | Mr(expt)  | Mr(calc)  | Delta   | Miss | Score | Expect  | Rank | Peptide                              |
|----------------------|----------|-----------|-----------|---------|------|-------|---------|------|--------------------------------------|
| <a href="#">695</a>  | 481.4921 | 960.9697  | 959.5287  | 1.4410  | 1    | 11    | 18      | 6    | K.KGISEEVAK.K                        |
| <a href="#">784</a>  | 490.0271 | 978.0397  | 978.5134  | -0.4737 | 0    | 52    | 0.0011  | 1    | K.SESLFLQR.K <a href="#">789</a>     |
| <a href="#">1283</a> | 543.6396 | 1085.2647 | 1084.6492 | 0.6155  | 0    | 13    | 9       | 2    | R.AIVGASLDVIK.E <a href="#">1282</a> |
| <a href="#">2603</a> | 647.7346 | 1293.4547 | 1292.7605 | 0.6943  | 2    | 2     | 1.1e+02 | 7    | K.IYPGKGKLYVR.G                      |
| <a href="#">4441</a> | 751.2181 | 1500.4217 | 1499.8168 | 0.6049  | 2    | 2     | 1.1e+02 | 8    | K.NAAAGKGTAQRIQSK.Q                  |
| <a href="#">4666</a> | 509.0462 | 1524.1167 | 1525.8940 | -1.7773 | 2    | 9     | 18      | 2    | R.AIVGASLDVIKERR.N                   |

334. [gi|220688938|gb|EED45290.1|](#) Mass: 43100 Score: 68 Queries matched: 7 emPAI: 0.08

cystathionine gamma-lyase [Aspergillus flavus NRRL3357]

| Query                 | Observed | Mr(expt)  | Mr(calc)  | Delta   | Miss | Score | Expect  | Rank | Peptide                                |
|-----------------------|----------|-----------|-----------|---------|------|-------|---------|------|----------------------------------------|
| <a href="#">1859</a>  | 596.4076 | 1190.8007 | 1190.5932 | 0.2076  | 0    | 8     | 29      | 2    | R.EAAGVFDDLVR.M                        |
| <a href="#">4512</a>  | 754.7276 | 1507.4407 | 1505.6892 | 1.7515  | 1    | 2     | 87      | 5    | -._MTNSTNGAPAQDKR.F                    |
| <a href="#">5337</a>  | 530.6565 | 1588.9477 | 1589.7798 | -0.8321 | 1    | 1     | 1.3e+02 | 9    | K.DQREAAGVFDDLVR.M                     |
| <a href="#">5370</a>  | 531.6992 | 1592.0757 | 1592.7300 | -0.6543 | 1    | 5     | 44      | 3    | K.QHRQGMGGMLSFR.I <a href="#">5391</a> |
| <a href="#">9141</a>  | 646.7195 | 1937.1367 | 1937.0806 | 0.0561  | 2    | 1     | 1.2e+02 | 7    | K.TLHLRAREATTNATAIAK.A                 |
| <a href="#">15257</a> | 968.3439 | 2902.0097 | 2899.4460 | 2.5638  | 0    | 68    | 1.6e-05 | 1    | K.VFTLAESLGGVESLCEVPASMTAGIPK.D        |

335. [gi|220698606|gb|EED54946.1|](#) Mass: 51334 Score: 67 Queries matched: 20 emPAI: 0.13

30S ribosomal subunit S4, putative [Aspergillus flavus NRRL3357]

| Query                | Observed | Mr(expt)  | Mr(calc)  | Delta   | Miss | Score | Expect | Rank | Peptide                          |
|----------------------|----------|-----------|-----------|---------|------|-------|--------|------|----------------------------------|
| <a href="#">359</a>  | 428.6501 | 855.2857  | 855.3909  | -0.1051 | 0    | 5     | 49     | 8    | R.AMFASSAR.Q                     |
| <a href="#">460</a>  | 443.1111 | 884.2077  | 884.5192  | -0.3114 | 2    | 11    | 12     | 9    | K.KDNKRPK.R <a href="#">458</a>  |
| <a href="#">843</a>  | 495.6116 | 989.2087  | 988.5818  | 0.6269  | 1    | 42    | 0.013  | 2    | R.RLDVAIFR.A <a href="#">842</a> |
| <a href="#">1889</a> | 599.7531 | 1197.4917 | 1195.5907 | 1.9010  | 1    | 2     | 96     | 7    | R.VMYATGAPKDK.H                  |
| <a href="#">2075</a> | 617.3591 | 1232.7037 | 1232.6150 | 0.0888  | 1    | 3     | 82     | 5    | R.GAGVEGTKDFPR.L                 |

|                       |           |           |           |         |   |    |         |   |                                         |
|-----------------------|-----------|-----------|-----------|---------|---|----|---------|---|-----------------------------------------|
| <a href="#">2312</a>  | 632.2156  | 1262.4167 | 1261.5786 | 0.8381  | 1 | 7  | 36      | 2 | K.EAESEEQGGQKK.E                        |
| <a href="#">3066</a>  | 673.6541  | 1345.2937 | 1343.6681 | 1.6256  | 2 | 10 | 17      | 8 | K.KENDDPRETLK.V                         |
| <a href="#">3204</a>  | 680.5581  | 1359.1017 | 1360.6470 | -1.5452 | 1 | 7  | 37      | 1 | K.KSAEAQEAEEAEAK.E <a href="#">3201</a> |
| <a href="#">3997</a>  | 724.3491  | 1446.6837 | 1445.8276 | 0.8562  | 1 | 1  | 1.3e+02 | 2 | K.VLLAQAKTIMAGSK.D                      |
| <a href="#">5474</a>  | 534.6929  | 1601.0567 | 1601.7984 | -0.7417 | 2 | 3  | 80      | 4 | R.VMYATGAPKDKHER.R                      |
| <a href="#">6123</a>  | 826.6856  | 1651.3567 | 1650.8440 | 0.5128  | 0 | 43 | 0.0078  | 1 | R.LTPFTQMTFAPLER.R <a href="#">6146</a> |
| <a href="#">8998</a>  | 640.4189  | 1918.2347 | 1917.0968 | 1.1379  | 2 | 0  | 1.3e+02 | 5 | R.ETLKVLLAQAKTIMAGSK.D                  |
| <a href="#">9267</a>  | 652.1742  | 1953.5007 | 1952.0380 | 1.4627  | 2 | 7  | 28      | 9 | K.LRQSWSKYNLFLNQR.L                     |
| <a href="#">10695</a> | 1064.2431 | 2126.4717 | 2125.1327 | 1.3390  | 2 | 3  | 66      | 1 | R.QARQFVVHGAVTVNGKQMR.Y                 |
| <a href="#">13395</a> | 836.5535  | 2506.6387 | 2507.2267 | -0.5880 | 1 | 0  | 1.2e+02 | 8 | K.QMRYPGYLLNPGDLFQVDPER.V               |
| <a href="#">13598</a> | 844.4025  | 2530.1857 | 2531.3179 | -1.1322 | 2 | 2  | 72      | 1 | R.AMFASSARQARQFVVHGAVTVNGK.Q            |

336. [gi|220690532|gb|EED46881.1|](#) Mass: 36386 Score: 67 Queries matched: 5 emPAI: 0.09

aldo/keto reductase, putative [Aspergillus flavus NRRL3357]

| Query                 | Observed | Mr(expt)  | Mr(calc)  | Delta   | Miss | Score | Expect | Rank | Peptide                                |
|-----------------------|----------|-----------|-----------|---------|------|-------|--------|------|----------------------------------------|
| <a href="#">1246</a>  | 540.2371 | 1078.4597 | 1077.5706 | 0.8891  | 0    | 10    | 19     | 1    | R.IEGLEYLNK.I                          |
| <a href="#">1412</a>  | 555.2746 | 1108.5347 | 1107.5924 | 0.9423  | 1    | 8     | 24     | 8    | K.REDLFVTTK.V                          |
| <a href="#">5250</a>  | 791.8931 | 1581.7717 | 1581.7562 | 0.0155  | 0    | 51    | 0.0012 | 1    | R.YDDVLWSLEDSLK.N <a href="#">5257</a> |
| <a href="#">10974</a> | 722.3702 | 2164.0887 | 2164.1892 | -0.1005 | 2    | 3     | 68     | 5    | K.HQPKLGPDKYIILEDLTK.N                 |

337. [gi|220696592|gb|EED52934.1|](#) Mass: 237325 Score: 67 Queries matched: 45 emPAI: 0.03

acetyl-CoA carboxylase, putative [Aspergillus flavus NRRL3357]

| Query                | Observed  | Mr(expt)  | Mr(calc)  | Delta   | Miss | Score | Expect  | Rank | Peptide                                 |
|----------------------|-----------|-----------|-----------|---------|------|-------|---------|------|-----------------------------------------|
| <a href="#">59</a>   | 684.5530  | 683.5457  | 682.4490  | 1.0967  | 1    | 9     | 14      | 5    | R.KLGIPR.I <a href="#">58</a>           |
| <a href="#">669</a>  | 479.6541  | 957.2937  | 956.5767  | 0.7170  | 1    | 4     | 69      | 10   | K.QLQKTIAR.F                            |
| <a href="#">793</a>  | 980.6790  | 979.6717  | 979.5273  | 0.1444  | 1    | 4     | 56      | 3    | R.RVTFICGK.N <a href="#">790</a>        |
| <a href="#">1259</a> | 1081.5370 | 1080.5297 | 1080.6655 | -0.1358 | 1    | 7     | 33      | 3    | R.HKITTIIGAK.D <a href="#">1257</a>     |
| <a href="#">1378</a> | 1104.3450 | 1103.3377 | 1101.6216 | 1.7161  | 0    | 1     | 1.4e+02 | 7    | R.LSQMELILR.S                           |
| <a href="#">1915</a> | 603.1361  | 1204.2577 | 1203.6459 | 0.6119  | 1    | 5     | 62      | 4    | K.LTELESRSAAK.V                         |
| <a href="#">2848</a> | 441.4799  | 1321.4177 | 1318.7622 | 2.6555  | 1    | 4     | 61      | 5    | R.YFVRAVVRPGR.L                         |
| <a href="#">3441</a> | 691.8831  | 1381.7517 | 1381.7929 | -0.0412 | 0    | 34    | 0.061   | 1    | R.ALADGGLLVLLDGR.S <a href="#">3446</a> |
| <a href="#">3549</a> | 697.8746  | 1393.7347 | 1392.6885 | 1.0462  | 0    | 5     | 47      | 2    | K.GIVTVEDEVYNR.G                        |
| <a href="#">3604</a> | 700.8906  | 1399.7667 | 1399.8009 | -0.0342 | 1    | 0     | 1.5e+02 | 3    | K.KILFIGPPASAMR.S                       |
| <a href="#">3787</a> | 713.7196  | 1425.4247 | 1424.8173 | 0.6074  | 1    | 1     | 1.2e+02 | 5    | K.HMVIALKELSIR.G                        |
| <a href="#">3926</a> | 480.5212  | 1438.5417 | 1438.7126 | -0.1709 | 0    | 11    | 13      | 1    | R.GFDNQVIMGTTLK.E <a href="#">3929</a>  |
| <a href="#">3945</a> | 721.8566  | 1441.6987 | 1442.7841 | -1.0854 | 2    | 2     | 98      | 9    | R.NTRDEDAILKLR.D                        |
| <a href="#">4003</a> | 724.6456  | 1447.2767 | 1445.6535 | 1.6232  | 0    | 13    | 7.1     | 2    | K.AHQASEAGVEEYR.K                       |
| <a href="#">4992</a> | 778.7946  | 1555.5747 | 1554.8082 | 0.7665  | 0    | 57    | 0.00033 | 1    | K.TVFPVDFIYEGLR.Y                       |
| <a href="#">5106</a> | 523.6045  | 1567.7917 | 1566.8154 | 0.9763  | 0    | 1     | 1.2e+02 | 9    | R.HSEPALAFQLELGR.L                      |

|                       |                 |                  |                  |                |          |            |                |           |                                                  |
|-----------------------|-----------------|------------------|------------------|----------------|----------|------------|----------------|-----------|--------------------------------------------------|
| <a href="#">5371</a>  | 531.7249        | 1592.1527        | 1590.8076        | 1.3452         | 0        | 8          | 26             | 6         | R.AIQFTVMATPEDLR.A                               |
| <a href="#">5954</a>  | <b>820.7036</b> | <b>1639.3927</b> | <b>1638.9239</b> | <b>0.4688</b>  | <b>1</b> | <b>5</b>   | <b>46</b>      | <b>9</b>  | <b>R.ARLGGIPMGVIAVETR.S</b> <a href="#">5955</a> |
| <a href="#">6805</a>  | 567.9982        | 1700.9727        | 1701.8760        | -0.9033        | 0        | 8          | 21             | 9         | R.ILCTDPTTGVVYPLR.V                              |
| <a href="#">7362</a>  | 586.4289        | 1756.2647        | 1755.8791        | 0.3856         | 1        | 4          | 62             | 5         | R.NIHVYEAIGKGPESDK.A                             |
| <a href="#">7574</a>  | 887.8536        | 1773.6927        | 1771.9655        | 1.7273         | 1        | 4          | 58             | 7         | K.ILFIGPPASAMRSLGDK.I                            |
| <a href="#">7880</a>  | 601.4505        | 1801.3297        | 1799.9629        | 1.3669         | 0        | 6          | 39             | 5         | R.SLEDSSLNVAQLLIGNK.D <a href="#">7885</a>       |
| <a href="#">8293</a>  | 924.2841        | 1846.5537        | 1845.9982        | 0.5555         | 1        | 2          | 92             | 4         | R.LSQMELILRSSVVESR.Y                             |
| <a href="#">8353</a>  | <b>618.2485</b> | <b>1851.7237</b> | <b>1851.9149</b> | <b>-0.1911</b> | <b>1</b> | <b>2</b>   | <b>83</b>      | <b>10</b> | <b>K.QLDTMARLDATYGELR.R</b>                      |
| <a href="#">8625</a>  | <b>628.7912</b> | <b>1883.3517</b> | <b>1884.0403</b> | <b>-0.6886</b> | <b>2</b> | <b>1</b>   | <b>1e+02</b>   | <b>3</b>  | <b>K.HMVIALKELSRGDFR.T</b>                       |
| <a href="#">9303</a>  | <b>654.1135</b> | <b>1959.3187</b> | <b>1961.0366</b> | <b>-1.7178</b> | <b>0</b> | <b>(0)</b> | <b>1.3e+02</b> | <b>5</b>  | <b>K.MYMPIAQEDGIVQLIK.Q</b>                      |
| <a href="#">9602</a>  | 998.4836        | 1994.9527        | 1993.0264        | 1.9263         | 0        | 3          | 76             | 3         | K.MYMPIAQEDGIVQLIK.Q <a href="#">9596</a>        |
| <a href="#">9662</a>  | 668.6179        | 2002.8317        | 2000.9915        | 1.8402         | 2        | 9          | 18             | 2         | K.AHQASEAGVEEYRKGLEK.G                           |
| <a href="#">9787</a>  | <b>673.9985</b> | <b>2018.9737</b> | <b>2018.0619</b> | <b>0.9118</b>  | <b>2</b> | <b>3</b>   | <b>63</b>      | <b>3</b>  | <b>K.EIGFPVMIKASEGGGGKGR.K</b>                   |
| <a href="#">10012</a> | 681.1569        | 2040.4487        | 2039.1051        | 1.3436         | 2        | 6          | 36             | 7         | K.ELSIRGDFRTTVEYLIK.L                            |
| <a href="#">11469</a> | 744.5109        | 2230.5107        | 2231.1837        | -0.6730        | 1        | 4          | 57             | 3         | R.KGVLLPVQYLEDAAEYLPR.A                          |
| <a href="#">11566</a> | 749.7335        | 2246.1787        | 2244.1824        | 1.9964         | 0        | 9          | 18             | 2         | K.IIEEAPVTIAKPTTFQAMER.A                         |
| <a href="#">12559</a> | 798.1889        | 2391.5447        | 2389.1590        | 2.3857         | 0        | 3          | 66             | 7         | K.GIQYHSSGEPPLLSWDFTLK.L                         |
| <a href="#">12563</a> | <b>798.6969</b> | <b>2393.0687</b> | <b>2394.2002</b> | <b>-1.1314</b> | <b>1</b> | <b>10</b>  | <b>11</b>      | <b>1</b>  | <b>R.AIQFTVMATPEDLRANADYIR.M</b>                 |
| <a href="#">12604</a> | <b>801.1912</b> | <b>2400.5517</b> | <b>2399.2068</b> | <b>1.3450</b>  | <b>0</b> | <b>2</b>   | <b>72</b>      | <b>5</b>  | <b>R.DVEDLDDTQIVSQINGILADVK.D</b>                |
| <a href="#">13809</a> | <b>855.4479</b> | <b>2563.3217</b> | <b>2564.3573</b> | <b>-1.0356</b> | <b>1</b> | <b>1</b>   | <b>90</b>      | <b>4</b>  | <b>K.LGSMHLRPVSTPYPTKEWLQPK.R</b>                |
| <a href="#">14710</a> | 909.7625        | 2726.2657        | 2726.2858        | -0.0200        | 1        | 0          | 1e+02          | 6         | K.GIVTVEDEVYNRGCTFSPEEGLQK.A                     |

338. [gi|220692623|gb|EED48969.1|](#) Mass: 40060 Score: 67 Queries matched: 14 emPAI: 0.08

mitochondrial phosphate carrier protein, putative [Aspergillus flavus NRRL3357]

| Query                 | Observed        | Mr(expt)         | Mr(calc)         | Delta          | Miss     | Score     | Expect         | Rank     | Peptide                                                                              |
|-----------------------|-----------------|------------------|------------------|----------------|----------|-----------|----------------|----------|--------------------------------------------------------------------------------------|
| <a href="#">352</a>   | 851.4700        | 850.4627         | 850.4297         | 0.0330         | 0        | 15        | 5              | 2        | R.GSFSGIGAR.L                                                                        |
| <a href="#">862</a>   | <b>498.0806</b> | <b>994.1467</b>  | <b>993.4596</b>  | <b>0.6871</b>  | <b>0</b> | <b>50</b> | <b>0.0015</b>  | <b>1</b> | <b>K.FGGYEFFK.Q</b> <a href="#">865</a>                                              |
| <a href="#">1372</a>  | 551.9041        | 1101.7937        | 1101.5852        | 0.2085         | 0        | 13        | 9.4            | 3        | K.AMGAVGGVEIAK.- <a href="#">1371</a> <a href="#">1373</a>                           |
| <a href="#">2201</a>  | <b>625.2381</b> | <b>1248.4617</b> | <b>1245.6751</b> | <b>2.7866</b>  | <b>1</b> | <b>1</b>  | <b>1.4e+02</b> | <b>8</b> | <b>K.KAMGAVGGVEIAK.-</b>                                                             |
| <a href="#">3770</a>  | <b>475.6019</b> | <b>1423.7837</b> | <b>1422.6925</b> | <b>1.0912</b>  | <b>0</b> | <b>18</b> | <b>2.4</b>     | <b>1</b> | <b>-.MQADLASAGSGLFR.D</b> <a href="#">3764</a>                                       |
| <a href="#">7059</a>  | 862.7186        | 1723.4227        | 1722.8941        | 0.5286         | 0        | 33        | 0.068          | 2        | R.LVSEPTFASGLVSGFGR.I <a href="#">7043</a> <a href="#">7068</a> <a href="#">7074</a> |
| <a href="#">14211</a> | <b>883.2635</b> | <b>2646.7687</b> | <b>2648.3204</b> | <b>-1.5517</b> | <b>1</b> | <b>4</b>  | <b>40</b>      | <b>2</b> | <b>R.FAFAGAVCCSVTHGGLTPVDVVKTR.I</b>                                                 |

339. [gi|220696165|gb|EED52507.1|](#) Mass: 53065 Score: 67 Queries matched: 9 emPAI: 0.13

Fasciclin domain family protein [Aspergillus flavus NRRL3357]

| Query                 | Observed         | Mr(expt)         | Mr(calc)         | Delta          | Miss     | Score     | Expect         | Rank     | Peptide                         |
|-----------------------|------------------|------------------|------------------|----------------|----------|-----------|----------------|----------|---------------------------------|
| <a href="#">3458</a>  | <b>693.2926</b>  | <b>1384.5707</b> | <b>1383.7187</b> | <b>0.8520</b>  | <b>0</b> | <b>65</b> | <b>4.9e-05</b> | <b>1</b> | <b>K.INAFLFSPYGQK.Y</b>         |
| <a href="#">6160</a>  | 827.8281         | 1653.6417        | 1651.9158        | 1.7259         | 1        | 1         | 1.2e+02        | 4        | K.GFTHLDLPTLLGGRR.L             |
| <a href="#">12058</a> | <b>1157.8871</b> | <b>2313.7597</b> | <b>2315.1685</b> | <b>-1.4088</b> | <b>0</b> | <b>28</b> | <b>0.22</b>    | <b>1</b> | <b>R.TLYSDVIYTEEGEIRPFGVK.G</b> |

|                       |          |           |           |         |   |   |         |    |                                                     |
|-----------------------|----------|-----------|-----------|---------|---|---|---------|----|-----------------------------------------------------|
| <a href="#">12245</a> | 781.7845 | 2342.3317 | 2340.3555 | 1.9762  | 2 | 0 | 1.3e+02 | 10 | K.TIYELITESKYTTILAKLIK.E                            |
| <a href="#">14052</a> | 871.4142 | 2611.2207 | 2609.4653 | 1.7554  | 2 | 3 | 53      | 3  | R.VAVADALGRDGNVHIVDQVLVPPKK.V <a href="#">14057</a> |
| <a href="#">14674</a> | 908.1832 | 2721.5277 | 2723.4382 | -1.9104 | 2 | 2 | 75      | 6  | K.FSTFDLAILKTNLTIPENTGKDTGK.G <a href="#">14708</a> |
| <a href="#">15390</a> | 990.6752 | 2969.0037 | 2969.2338 | -0.2301 | 0 | 3 | 53      | 1  | R.LAAWVEDDQDDYDEGMELWAHAFDL.-                       |

340. [gi|220694386|gb|EED50730.1|](#) Mass: 34275 Score: 66 Queries matched: 10 emPAI: 0.10

mitochondrial phosphate transporter Pic2, putative [Aspergillus flavus NRRL3357]

| Query                 | Observed  | Mr(expt)  | Mr(calc)  | Delta   | Miss | Score | Expect  | Rank | Peptide                         |
|-----------------------|-----------|-----------|-----------|---------|------|-------|---------|------|---------------------------------|
| <a href="#">2495</a>  | 641.7091  | 1281.4037 | 1280.6765 | 0.7272  | 0    | 66    | 3.6e-05 | 1    | K.IVAQEGFGGLYK.G                |
| <a href="#">4743</a>  | 767.4426  | 1532.8707 | 1531.7558 | 1.1149  | 0    | 14    | 7.1     | 4    | K.FATFEETVNAIYK.T               |
| <a href="#">6081</a>  | 824.8126  | 1647.6107 | 1647.7174 | -0.1066 | 0    | (0)   | 1.5e+02 | 1    | K.YLYGDQMFPNMNR.T               |
| <a href="#">6549</a>  | 841.7656  | 1681.5167 | 1679.7072 | 1.8095  | 0    | 7     | 27      | 2    | K.YLYGDQMFPNMNR.T               |
| <a href="#">8096</a>  | 608.4069  | 1822.1987 | 1823.9022 | -1.7035 | 1    | 2     | 91      | 6    | K.VRMQTTLPPYAQTMR.E             |
| <a href="#">9285</a>  | 652.9975  | 1955.9707 | 1953.0182 | 2.9525  | 1    | 3     | 65      | 2    | K.GLYPLWARQIPYTMK.F             |
| <a href="#">10791</a> | 1071.2151 | 2140.4157 | 2140.0081 | 0.4076  | 1    | 5     | 39      | 1    | R.MQTTLPPYAQTMREGWSK.I          |
| <a href="#">12142</a> | 776.2859  | 2325.8357 | 2323.2324 | 2.6033  | 2    | 3     | 72      | 8    | R.QVDPKIYTSNISAWRSIFAK.E        |
| <a href="#">12690</a> | 805.4039  | 2413.1897 | 2411.1726 | 2.0171  | 2    | 4     | 49      | 4    | K.VRMQTTLPPYAQTMREGWSK.I        |
| <a href="#">15756</a> | 1041.2595 | 3120.7567 | 3118.6413 | 2.1155  | 2    | 0     | 95      | 4    | R.QIPYTMKFAATFEETVNAIYKTLGKPK.E |

341. [gi|220695459|gb|EED51802.1|](#) Mass: 71403 Score: 66 Queries matched: 18 emPAI: 0.05

glutaminyl-tRNA synthetase [Aspergillus flavus NRRL3357]

| Query                 | Observed  | Mr(expt)  | Mr(calc)  | Delta   | Miss | Score | Expect  | Rank | Peptide                                        |
|-----------------------|-----------|-----------|-----------|---------|------|-------|---------|------|------------------------------------------------|
| <a href="#">1196</a>  | 535.4421  | 1068.8697 | 1067.4923 | 1.3774  | 0    | 1     | 1.3e+02 | 7    | R.ESYEWLNK.T                                   |
| <a href="#">1503</a>  | 563.2691  | 1124.5237 | 1123.5662 | 0.9575  | 0    | 10    | 15      | 1    | K.YEPQTAFLR.M                                  |
| <a href="#">2654</a>  | 650.3991  | 1298.7837 | 1298.6691 | 0.1146  | 2    | 12    | 9.4     | 6    | K.LQGGEDGKSPR.F <a href="#">2659</a>           |
| <a href="#">3926</a>  | 480.5212  | 1438.5417 | 1436.6493 | 1.8924  | 0    | 6     | 35      | 6    | K.SAEPTLDPDAMFK.Q <a href="#">3929</a>         |
| <a href="#">4996</a>  | 779.1486  | 1556.2827 | 1555.7664 | 0.5163  | 1    | 1     | 1.3e+02 | 10   | R.EYGRNLVSGTVMSK.R                             |
| <a href="#">6459</a>  | 838.8081  | 1675.6017 | 1675.8471 | -0.2453 | 0    | 16    | 3.7     | 1    | R.FPPEPNGYLHLGHAK.A <a href="#">6468</a>       |
| <a href="#">10305</a> | 691.2709  | 2070.7907 | 2069.1058 | 1.6850  | 2    | 0     | 1.2e+02 | 10   | K.DAPKPKAYIQWPEGSRK.V                          |
| <a href="#">10483</a> | 1048.5181 | 2095.0217 | 2093.0993 | 1.9224  | 1    | 2     | 83      | 2    | K.AIAINFGFARYHGGVTMLR.F                        |
| <a href="#">11059</a> | 725.7979  | 2174.3717 | 2172.2089 | 2.1628  | 2    | 6     | 30      | 8    | R.RYLETSVPRMLVLDPVR.V                          |
| <a href="#">11808</a> | 1142.3981 | 2282.7817 | 2281.2206 | 1.5611  | 0    | 66    | 3e-05   | 1    | R.VVIQDLGDLGQELVLPFSPK.Q                       |
| <a href="#">12289</a> | 784.2842  | 2349.8307 | 2348.3005 | 1.5302  | 1    | 3     | 69      | 9    | K.DFFRLSPGQTVGLLQVPHPIK.A                      |
| <a href="#">12298</a> | 784.6862  | 2351.0367 | 2349.1522 | 1.8845  | 2    | 2     | 77      | 2    | K.LKMTSTVYIDQSDFREVSSEK.D                      |
| <a href="#">12663</a> | 804.1729  | 2409.4967 | 2407.1776 | 2.3191  | 1    | 8     | 20      | 2    | R.MRQELLTSGNPQMWDIVAYR.I <a href="#">12647</a> |
| <a href="#">12793</a> | 809.5335  | 2425.5787 | 2423.0699 | 2.5088  | 1    | 4     | 50      | 1    | R.YHGGVTMLRFDDTNPDAEEK.Y                       |

342. [gi|220698176|gb|EED54516.1|](#) Mass: 172254 Score: 66 Queries matched: 46 emPAI: 0.04

pentafunctional polypeptide (AroM), putative [Aspergillus flavus NRRL3357]

| Query                 | Observed         | Mr(expt)         | Mr(calc)         | Delta          | Miss     | Score     | Expect         | Rank     | Peptide                                                        |
|-----------------------|------------------|------------------|------------------|----------------|----------|-----------|----------------|----------|----------------------------------------------------------------|
| <a href="#">69</a>    | 688.5100         | 687.5027         | 687.3551         | 0.1476         | 0        | 8         | 40             | 9        | K.EAELAR.H                                                     |
| <a href="#">263</a>   | <b>816.5720</b>  | <b>815.5647</b>  | <b>815.4752</b>  | <b>0.0895</b>  | <b>1</b> | <b>16</b> | <b>5</b>       | <b>4</b> | <b>K.LEGKELK.E</b>                                             |
| <a href="#">545</a>   | 456.6136         | 911.2127         | 911.5916         | -0.3789        | 1        | 6         | 34             | 6        | K.GVAVARIVK.C <a href="#">550</a>                              |
| <a href="#">585</a>   | 921.4650         | 920.4577         | 920.4637         | -0.0060        | 1        | 8         | 28             | 10       | K.AMKDELAK.F                                                   |
| <a href="#">654</a>   | 475.6021         | 949.1897         | 946.5157         | 2.6740         | 0        | 14        | 7.5            | 5        | K.GLSLMGEIK.Q                                                  |
| <a href="#">1319</a>  | 546.5991         | 1091.1837        | 1090.6056        | 0.5781         | 1        | 12        | 10             | 3        | R.KGLSLMGEIK.Q <a href="#">1320</a>                            |
| <a href="#">1852</a>  | 595.7601         | 1189.5057        | 1190.6264        | -1.1206        | 1        | 5         | 50             | 7        | K.NKGNVMLIMR.D                                                 |
| <a href="#">1877</a>  | <b>599.3161</b>  | <b>1196.6177</b> | <b>1196.7968</b> | <b>-0.1791</b> | <b>2</b> | <b>8</b>  | <b>24</b>      | <b>7</b> | <b>K.KKIVLLSAIGR.T</b>                                         |
| <a href="#">1911</a>  | 602.7651         | 1203.5157        | 1202.6693        | 0.8465         | 1        | 6         | 41             | 3        | K.GLSLMGEIKQK.K <a href="#">1908</a>                           |
| <a href="#">2010</a>  | 611.2821         | 1220.5497        | 1218.6642        | 1.8855         | 1        | (6)       | 42             | 5        | K.GLSLMGEIKQK.K                                                |
| <a href="#">2013</a>  | 611.6301         | 1221.2457        | 1221.6064        | -0.3606        | 0        | 5         | 48             | 9        | K.QVMDFLNIDK.T                                                 |
| <a href="#">2158</a>  | 623.1881         | 1244.3617        | 1243.6521        | 0.7097         | 0        | 4         | 69             | 3        | K.DASALVIGGGGTAR.A                                             |
| <a href="#">2370</a>  | 635.0111         | 1268.0077        | 1267.7037        | 0.3040         | 0        | 11        | 13             | 2        | K.NLIGAIWQPTR.I <a href="#">2368</a>                           |
| <a href="#">2627</a>  | <b>432.8292</b>  | <b>1295.4657</b> | <b>1292.6798</b> | <b>2.7859</b>  | <b>0</b> | <b>5</b>  | <b>49</b>      | <b>6</b> | <b>K.CIAAYGLPTSLK.D</b>                                        |
| <a href="#">3079</a>  | 674.4926         | 1346.9707        | 1346.7591        | 0.2116         | 2        | 3         | 85             | 4        | R.KGLSLMGEIKQK.K                                               |
| <a href="#">3135</a>  | 676.8951         | 1351.7757        | 1351.7249        | 0.0509         | 1        | 17        | 3.3            | 2        | K.KFAVFGTPVSGSR.S                                              |
| <a href="#">4112</a>  | <b>731.1191</b>  | <b>1460.2237</b> | <b>1459.7154</b> | <b>0.5083</b>  | <b>1</b> | <b>4</b>  | <b>63</b>      | <b>4</b> | <b>R.AQEADADVKTGEK.A</b>                                       |
| <a href="#">4415</a>  | <b>748.8761</b>  | <b>1495.7377</b> | <b>1493.8024</b> | <b>1.9353</b>  | <b>1</b> | <b>3</b>  | <b>70</b>      | <b>2</b> | <b>R.ATASVFIIGMRGAGK.T</b>                                     |
| <a href="#">4637</a>  | 761.9776         | 1521.9407        | 1522.7524        | -0.8117        | 0        | 1         | 1.2e+02        | 6        | R.FAVEVLGPMGCTVK.Q                                             |
| <a href="#">4891</a>  | <b>773.7731</b>  | <b>1545.5317</b> | <b>1543.8471</b> | <b>1.6846</b>  | <b>1</b> | <b>1</b>  | <b>1.4e+02</b> | <b>2</b> | <b>K.GSLPLKVAASGGFAGGR.I</b>                                   |
| <a href="#">5133</a>  | <b>524.4679</b>  | <b>1570.3817</b> | <b>1571.7791</b> | <b>-1.3973</b> | <b>1</b> | <b>10</b> | <b>17</b>      | <b>1</b> | <b>K.ELKEEESPLAGAGR.A</b>                                      |
| <a href="#">6113</a>  | <b>826.2801</b>  | <b>1650.5457</b> | <b>1647.8468</b> | <b>2.6989</b>  | <b>1</b> | <b>1</b>  | <b>1.3e+02</b> | <b>5</b> | <b>R.LETANVEDVKDFIR.S</b>                                      |
| <a href="#">6405</a>  | <b>837.0396</b>  | <b>1672.0647</b> | <b>1671.9420</b> | <b>0.1227</b>  | <b>2</b> | <b>2</b>  | <b>83</b>      | <b>1</b> | <b>R.KGSLPLKVAASGGFAGGR.I</b>                                  |
| <a href="#">7574</a>  | 887.8536         | 1773.6927        | 1771.9502        | 1.7425         | 1        | 4         | 65             | 10       | K.VCVGSDAVELRVDLLK.D <a href="#">7543</a>                      |
| <a href="#">8042</a>  | 909.3371         | 1816.6597        | 1814.9679        | 1.6918         | 1        | 3         | 67             | 7        | R.KPGQRWFEGIEDILK.A                                            |
| <a href="#">8680</a>  | 629.7755         | 1886.3047        | 1885.0170        | 1.2878         | 2        | 2         | 84             | 7        | R.ILASARHKAYVVSADER.E                                          |
| <a href="#">9982</a>  | 1019.7181        | 2037.4217        | 2034.9080        | 2.5137         | 1        | 3         | 71             | 3        | K.GELSWANMSWMKYNR.A                                            |
| <a href="#">10738</a> | <b>712.0539</b>  | <b>2133.1397</b> | <b>2134.0582</b> | <b>-0.9185</b> | <b>0</b> | <b>0</b>  | <b>1.2e+02</b> | <b>3</b> | <b>R.LGAATFSWEEEGEVLVNGK.G</b>                                 |
| <a href="#">11423</a> | 1112.8391        | 2223.6637        | 2222.1232        | 1.5405         | 0        | 1         | 98             | 7        | R.SPVLHNTLFSQAGLPHEYGR.L <a href="#">11424</a>                 |
| <a href="#">11666</a> | <b>754.8239</b>  | <b>2261.4497</b> | <b>2260.1344</b> | <b>1.3153</b>  | <b>1</b> | <b>5</b>  | <b>39</b>      | <b>3</b> | <b>K.LTAGKHCSDVQLLFNMALDK.K</b>                                |
| <a href="#">11891</a> | <b>765.8759</b>  | <b>2294.6057</b> | <b>2292.2266</b> | <b>2.3791</b>  | <b>1</b> | <b>3</b>  | <b>60</b>      | <b>1</b> | <b>K.ILGQESIADFGWLWRNYVAK.D</b>                                |
| <a href="#">12328</a> | <b>786.7865</b>  | <b>2357.3377</b> | <b>2358.2583</b> | <b>-0.9206</b> | <b>1</b> | <b>7</b>  | <b>27</b>      | <b>1</b> | <b>K.HSFFVSLTLPDLRTAGDILEK.V <a href="#">12321</a></b>         |
| <a href="#">13231</a> | 829.1845         | 2484.5317        | 2486.3533        | -1.8216        | 2        | 0         | 1.1e+02        | 6        | K.KHSFFVSLTLPDLRTAGDILEK.V                                     |
| <a href="#">13569</a> | <b>843.2185</b>  | <b>2526.6337</b> | <b>2527.2993</b> | <b>-0.6655</b> | <b>0</b> | <b>3</b>  | <b>67</b>      | <b>4</b> | <b>R.DTVVIALGGVIGDLTGFASTYMR.G</b>                             |
| <a href="#">14239</a> | <b>884.9572</b>  | <b>2651.8497</b> | <b>2650.2973</b> | <b>1.5524</b>  | <b>0</b> | <b>52</b> | <b>0.00074</b> | <b>1</b> | <b>K.TAAISSEEEFTAEDNAEAILTAVR.S</b>                            |
| <a href="#">15452</a> | <b>999.3449</b>  | <b>2995.0127</b> | <b>2993.4692</b> | <b>1.5435</b>  | <b>1</b> | <b>41</b> | <b>0.0087</b>  | <b>1</b> | <b>R.VDLLKDPASDSDIPSVDYVAEQMAFLR.S</b>                         |
| <a href="#">15889</a> | 1066.9435        | 3197.8087        | 3198.5777        | -0.7689        | 2        | 2         | 52             | 2        | K.QVMDFLNIDKTRPAYVEDMMGVWLR.R.K                                |
| <a href="#">16312</a> | <b>1142.8019</b> | <b>3425.3837</b> | <b>3423.7353</b> | <b>1.6484</b>  | <b>1</b> | <b>1</b>  | <b>68</b>      | <b>6</b> | <b>K.TIPTVAIGTIPADKPIDPVMRETLCMFER.A <a href="#">16316</a></b> |

343. [gi|220701102|gb|EED57440.1|](#) Mass: 40943 Score: 66 Queries matched: 13 emPAI: 0.08

Phe-inhibited DAHP synthase AroG [Aspergillus flavus NRRL3357]

| Query                 | Observed         | Mr(expt)         | Mr(calc)         | Delta          | Miss     | Score     | Expect        | Rank     | Peptide                                                            |
|-----------------------|------------------|------------------|------------------|----------------|----------|-----------|---------------|----------|--------------------------------------------------------------------|
| <a href="#">835</a>   | 495.1251         | 988.2357         | 987.4807         | 0.7550         | 0        | 18        | 3             | 3        | K.LSAQGM <del>EPR</del> .L <a href="#">833</a> <a href="#">838</a> |
| <a href="#">3133</a>  | <b>676.7001</b>  | <b>1351.3857</b> | <b>1350.7184</b> | <b>0.6674</b>  | <b>0</b> | <b>54</b> | <b>0.0006</b> | <b>1</b> | <b>R.ELASGLSFPVGFK.N</b> <a href="#">3111</a>                      |
| <a href="#">4101</a>  | 730.5006         | 1458.9867        | 1456.6794        | 2.3073         | 0        | 5         | 55            | 6        | R.QEASAVVHGTD <del>TDK</del> .R                                    |
| <a href="#">4972</a>  | 518.5735         | 1552.6987        | 1551.8330        | 0.8657         | 2        | 20        | 1.5           | 1        | K.EKYKDELLIV <del>MR</del> .A <a href="#">4975</a>                 |
| <a href="#">13007</a> | 820.7039         | 2459.0897        | 2459.1829        | -0.0932        | 1        | 6         | 27            | 6        | M.SFFIENPNVGD <del>TNHLEDSRIR</del> .G                             |
| <a href="#">13212</a> | <b>828.4615</b>  | <b>2482.3627</b> | <b>2481.2322</b> | <b>1.1305</b>  | <b>0</b> | <b>7</b>  | <b>25</b>     | <b>1</b> | <b>R.GYNPLTPPNLLQHEIAMTETSR.Q</b> <a href="#">13222</a>            |
| <a href="#">13929</a> | <b>863.2415</b>  | <b>2586.7027</b> | <b>2588.2073</b> | <b>-1.5046</b> | <b>0</b> | <b>8</b>  | <b>18</b>     | <b>1</b> | <b>R.LLVVVGPCSIHDP<del>EMALEYCDR</del>.L</b>                       |
| <a href="#">15469</a> | <b>1003.6915</b> | <b>3008.0527</b> | <b>3005.4660</b> | <b>2.5867</b>  | <b>0</b> | <b>10</b> | <b>9.7</b>    | <b>1</b> | <b>K.GMPIASEMLDTISPQFLADCLSVGAVGAR.T</b>                           |

344. [gi|220700807|gb|EED57145.1|](#) Mass: 54855 Score: 66 Queries matched: 18 emPAI: 0.06

protein phosphatase PP2A regulatory B subunit, putative [Aspergillus flavus NRRL3357]

| Query                 | Observed        | Mr(expt)         | Mr(calc)         | Delta          | Miss     | Score      | Expect         | Rank     | Peptide                                                    |
|-----------------------|-----------------|------------------|------------------|----------------|----------|------------|----------------|----------|------------------------------------------------------------|
| <a href="#">103</a>   | 717.4400        | 716.4327         | 717.3194         | -0.8867        | 0        | 11         | 20             | 8        | R.FSHDGR.Y                                                 |
| <a href="#">908</a>   | <b>502.6171</b> | <b>1003.2197</b> | <b>1001.5366</b> | <b>1.6831</b>  | <b>2</b> | <b>8</b>   | <b>29</b>      | <b>7</b> | <b>K.GANGKKG<del>NTR</del>.A</b>                           |
| <a href="#">1199</a>  | 535.6416        | 1069.2687        | 1069.5954        | -0.3267        | 1        | 9          | 18             | 8        | K.KVGVPTPM <del>NK</del> .G                                |
| <a href="#">1901</a>  | 401.0609        | 1200.1607        | 1201.6554        | -1.4946        | 1        | 13         | 8.2            | 5        | K.SLEIEEK <del>INK</del> .I                                |
| <a href="#">2065</a>  | 615.7411        | 1229.4677        | 1228.6346        | 0.8331         | 2        | 7          | 37             | 4        | R.AGSPGGPGSR <del>MKK</del> .E                             |
| <a href="#">2549</a>  | 644.6191        | 1287.2237        | 1284.7224        | 2.5013         | 2        | 6          | 42             | 4        | K.AKKVGVPTPM <del>NK</del> .G <a href="#">2526</a>         |
| <a href="#">2622</a>  | <b>648.6486</b> | <b>1295.2827</b> | <b>1294.5677</b> | <b>0.7150</b>  | <b>0</b> | <b>5</b>   | <b>51</b>      | <b>3</b> | <b>K.ETDADQIDFNK.K</b> <a href="#">2624</a>                |
| <a href="#">4536</a>  | <b>504.7979</b> | <b>1511.3717</b> | <b>1512.8082</b> | <b>-1.4365</b> | <b>2</b> | <b>7</b>   | <b>26</b>      | <b>4</b> | <b>K.KVGVPTPM<del>NK</del>GANGK.K</b> <a href="#">4542</a> |
| <a href="#">5316</a>  | <b>794.7901</b> | <b>1587.5657</b> | <b>1585.7988</b> | <b>1.7669</b>  | <b>0</b> | <b>66</b>  | <b>4.2e-05</b> | <b>1</b> | <b>R.SFFSEIISISDVR.F</b>                                   |
| <a href="#">6765</a>  | 850.2071        | 1698.3997        | 1697.7930        | 0.6067         | 2        | 4          | 54             | 8        | R. <del>MKK</del> ETDADQIDFNK.K                            |
| <a href="#">10622</a> | <b>706.1682</b> | <b>2115.4827</b> | <b>2113.9747</b> | <b>1.5080</b>  | <b>1</b> | <b>1</b>   | <b>1.2e+02</b> | <b>7</b> | <b>K.FTHMEMLISLNRCFGDK.G</b> <a href="#">10614</a>         |
| <a href="#">13136</a> | 825.2125        | 2472.6157        | 2470.2937        | 2.3220         | 2        | 2          | 81             | 7        | K.DPSMLKLRMTHHDTVVA <del>AVPR</del> .R                     |
| <a href="#">13251</a> | 829.9812        | 2486.9217        | 2486.2886        | 0.6331         | 2        | (0)        | 1.1e+02        | 6        | K.DPSMLKLRMTHHDTVVA <del>AVPR</del> .R                     |
| <a href="#">13269</a> | <b>830.7009</b> | <b>2489.0807</b> | <b>2486.2886</b> | <b>2.7921</b>  | <b>2</b> | <b>(1)</b> | <b>1e+02</b>   | <b>4</b> | <b>K.DPSMLKLRMTHHDTVVA<del>AVPR</del>.R</b>                |

345. [gi|220699111|gb|EED55450.1|](#) Mass: 23790 Score: 65 Queries matched: 2 emPAI: 0.14

hypothetical protein AFLA\_027220 [Aspergillus flavus NRRL3357]

| Query                 | Observed        | Mr(expt)         | Mr(calc)         | Delta         | Miss     | Score     | Expect         | Rank     | Peptide                                  |
|-----------------------|-----------------|------------------|------------------|---------------|----------|-----------|----------------|----------|------------------------------------------|
| <a href="#">6726</a>  | <b>848.0761</b> | <b>1694.1377</b> | <b>1693.8927</b> | <b>0.2451</b> | <b>0</b> | <b>65</b> | <b>4.5e-05</b> | <b>1</b> | <b>R.VPIDASETFLQLYAK.V</b>               |
| <a href="#">12861</a> | 812.7009        | 2435.0807        | 2432.2183        | 2.8624        | 0        | 8         | 20             | 3        | R.LTGDEDIAIGT <del>TSAEDGRPFVLR</del> .V |

346. [gi|220689935|gb|EED46285.1|](#) Mass: 8589 Score: 65 Queries matched: 1 emPAI: 0.41

NADH-ubiquinone oxidoreductase 9.5 kDa subunit, putative [Aspergillus flavus NRRL3357]

| Query | Observed | Mr(expt) | Mr(calc) | Delta | Miss | Score | Expect | Rank | Peptide |
|-------|----------|----------|----------|-------|------|-------|--------|------|---------|
|-------|----------|----------|----------|-------|------|-------|--------|------|---------|



[11765](#) **1140.4156** **2278.8167** **2278.1634** **0.6533** **0** **65** **4.2e-05** **1** **R.AFGDVDPPEPIPLTYPIQGPR.V**

347. [gi|220701509|gb|EED57847.1](#) **Mass:** 28319 **Score:** 64 **Queries matched:** 10 **emPAI:** 0.25  
eukaryotic translation initiation factor 3 subunit EifCk, putative [Aspergillus flavus NRRL3357]

| Query                 | Observed         | Mr(expt)         | Mr(calc)         | Delta          | Miss     | Score     | Expect       | Rank     | Peptide                                               |
|-----------------------|------------------|------------------|------------------|----------------|----------|-----------|--------------|----------|-------------------------------------------------------|
| <a href="#">541</a>   | 456.3911         | 910.7677         | 909.4379         | 1.3299         | 0        | 7         | 29           | 9        | R.VGVEMFGR.V                                          |
| <a href="#">2507</a>  | 428.6502         | 1282.9287        | 1281.6136        | 1.3152         | 1        | 12        | 9.4          | 5        | K.SERVGVEFMFGR.V                                      |
| <a href="#">3814</a>  | <b>715.2351</b>  | <b>1428.4557</b> | <b>1427.7119</b> | <b>0.7439</b>  | <b>0</b> | <b>42</b> | <b>0.01</b>  | <b>1</b> | <b>R.TFDCYANLALLK.L</b> <a href="#">3803</a>          |
| <a href="#">4132</a>  | 732.2561         | 1462.4977        | 1460.7219        | 1.7758         | 2        | 16        | 4            | 2        | K.ENEVRSEVKSER.V                                      |
| <a href="#">7067</a>  | <b>575.6809</b>  | <b>1724.0207</b> | <b>1724.8516</b> | <b>-0.8308</b> | <b>2</b> | <b>7</b>  | <b>25</b>    | <b>4</b> | <b>R.SEVKSERVGVEFMFGR.V</b>                           |
| <a href="#">8798</a>  | 633.7699         | 1898.2877        | 1899.9472        | -1.6595        | 0        | 1         | 1e+02        | 7        | K.CETRPANIDAILSLDR.Y                                  |
| <a href="#">12057</a> | <b>772.2602</b>  | <b>2313.7587</b> | <b>2312.2528</b> | <b>1.5059</b>  | <b>0</b> | <b>34</b> | <b>0.045</b> | <b>1</b> | <b>K.LYQFNPHLLQAETVTNILAK.A</b> <a href="#">12023</a> |
| <a href="#">13407</a> | <b>1254.9266</b> | <b>2507.8387</b> | <b>2505.1118</b> | <b>2.7269</b>  | <b>0</b> | <b>31</b> | <b>0.087</b> | <b>1</b> | <b>R.YNPETTTIFQDYVVQCEDR.T</b>                        |

348. [gi|220690835|gb|EED47184.1](#) **Mass:** 59030 **Score:** 64 **Queries matched:** 12 **emPAI:** 0.11  
aldehyde dehydrogenase, putative [Aspergillus flavus NRRL3357]

| Query                 | Observed        | Mr(expt)         | Mr(calc)         | Delta          | Miss     | Score     | Expect         | Rank     | Peptide                                                  |
|-----------------------|-----------------|------------------|------------------|----------------|----------|-----------|----------------|----------|----------------------------------------------------------|
| <a href="#">588</a>   | 461.6341        | 921.2537         | 920.4902         | 0.7635         | 1        | 11        | 14             | 3        | K.FMNPKIR.K                                              |
| <a href="#">1102</a>  | <b>526.5926</b> | <b>1051.1707</b> | <b>1050.5233</b> | <b>0.6474</b>  | <b>0</b> | <b>10</b> | <b>16</b>      | <b>1</b> | <b>K.AEDIDLTFK.F</b> <a href="#">1103</a>                |
| <a href="#">2618</a>  | 648.5826        | 1295.1507        | 1294.6261        | 0.5246         | 1        | 0         | 1.5e+02        | 10       | K.GKILMGGTMDEK.E                                         |
| <a href="#">4367</a>  | <b>497.6335</b> | <b>1489.8787</b> | <b>1490.8205</b> | <b>-0.9418</b> | <b>1</b> | <b>15</b> | <b>4.9</b>     | <b>1</b> | <b>R.YILTLGGGSAKAGAGR.A</b>                              |
| <a href="#">5226</a>  | 527.5972        | 1579.7697        | 1579.7698        | -0.0001        | 2        | 5         | 49             | 8        | K.GKILMGGTMDEKER.F                                       |
| <a href="#">8019</a>  | 908.2731        | 1814.5317        | 1812.0873        | 2.4444         | 0        | 2         | 88             | 6        | R.AVVVAAYLVLQVLER.R <a href="#">8013</a>                 |
| <a href="#">9355</a>  | <b>655.9339</b> | <b>1964.7797</b> | <b>1963.9599</b> | <b>0.8198</b>  | <b>0</b> | <b>59</b> | <b>0.00017</b> | <b>1</b> | <b>K.DHEQEIADASALDLGKPR.F</b>                            |
| <a href="#">10407</a> | <b>695.4652</b> | <b>2083.3737</b> | <b>2083.9952</b> | <b>-0.6215</b> | <b>2</b> | <b>3</b>  | <b>70</b>      | <b>2</b> | <b>K.SMLDNTKKGKILMGGTMDEK.E</b>                          |
| <a href="#">11893</a> | <b>765.9392</b> | <b>2294.7957</b> | <b>2294.3362</b> | <b>0.4595</b>  | <b>0</b> | <b>21</b> | <b>1</b>       | <b>1</b> | <b>K.AAAPHLTPVVLELGGINPAIITK.S</b> <a href="#">11909</a> |

349. [gi|220689366|gb|EED45717.1](#) **Mass:** 25691 **Score:** 64 **Queries matched:** 4 **emPAI:** 0.13  
UDP-glucose 4-epimerase [Aspergillus flavus NRRL3357]

| Query                 | Observed        | Mr(expt)         | Mr(calc)         | Delta          | Miss     | Score     | Expect         | Rank     | Peptide                     |
|-----------------------|-----------------|------------------|------------------|----------------|----------|-----------|----------------|----------|-----------------------------|
| <a href="#">567</a>   | 915.9530        | 914.9457         | 914.5549         | 0.3908         | 1        | 4         | 74             | 4        | R.RIELISGK.K                |
| <a href="#">3552</a>  | 698.0856        | 1394.1567        | 1393.7453        | 0.4115         | 0        | 3         | 79             | 2        | R.QEPPAEELLEQLK.K           |
| <a href="#">7023</a>  | <b>860.8326</b> | <b>1719.6507</b> | <b>1719.8791</b> | <b>-0.2284</b> | <b>0</b> | <b>64</b> | <b>6.3e-05</b> | <b>1</b> | <b>K.VVVADNLYNSSAEALR.R</b> |
| <a href="#">13013</a> | 820.7999        | 2459.3777        | 2459.2557        | 0.1220         | 1        | 4         | 49             | 2        | K.SHDGTAIRDYIHILDLDAGHLK.A  |

350. [gi|220696697|gb|EED53039.1](#) **Mass:** 53916 **Score:** 63 **Queries matched:** 21 **emPAI:** 0.06  
actin-bundling protein Sac6, putative [Aspergillus flavus NRRL3357]

| Query | Observed | Mr(expt) | Mr(calc) | Delta | Miss | Score | Expect | Rank | Peptide |
|-------|----------|----------|----------|-------|------|-------|--------|------|---------|
|-------|----------|----------|----------|-------|------|-------|--------|------|---------|

|                       |                  |                  |                  |               |          |           |              |          |                                                                    |
|-----------------------|------------------|------------------|------------------|---------------|----------|-----------|--------------|----------|--------------------------------------------------------------------|
| <a href="#">1245</a>  | 540.1241         | 1078.2337        | 1077.6546        | 0.5791        | 0        | 18        | 3            | 2        | R.LPPEQILLR.W <a href="#">1240</a>                                 |
| <a href="#">1440</a>  | 558.1316         | 1114.2487        | 1112.4622        | 1.7866        | 0        | 2         | 1e+02        | 8        | R.SDEEAYSNAK.L                                                     |
| <a href="#">2375</a>  | <b>635.6021</b>  | <b>1269.1897</b> | <b>1267.6884</b> | <b>1.5013</b> | <b>0</b> | <b>9</b>  | <b>21</b>    | <b>4</b> | <b>R.GPLQTQDLLQR.A</b>                                             |
| <a href="#">2707</a>  | 653.6971         | 1305.3797        | 1304.6156        | 0.7641        | 2        | 4         | 68           | 8        | R.WANDMSRRGGR.T                                                    |
| <a href="#">3063</a>  | <b>673.3176</b>  | <b>1344.6207</b> | <b>1343.7449</b> | <b>0.8758</b> | <b>0</b> | <b>63</b> | <b>8e-05</b> | <b>1</b> | <b>K.FLTPTSLVAGNPK.L <a href="#">3053</a> <a href="#">3054</a></b> |
| <a href="#">5469</a>  | 534.6385         | 1600.8937        | 1599.7246        | 1.1691        | 0        | 4         | 62           | 6        | R.HVNRPPTSGGEMMR.F                                                 |
| <a href="#">5536</a>  | 536.3252         | 1605.9537        | 1603.7698        | 2.1839        | 1        | 5         | 47           | 5        | R.MGKHEITDLEMIR.W                                                  |
| <a href="#">8165</a>  | 611.0679         | 1830.1817        | 1831.9131        | -1.7314       | 2        | 3         | 78           | 9        | R.WFNYHLRNARWNR.Q                                                  |
| <a href="#">10487</a> | 699.6505         | 2095.9297        | 2094.1527        | 1.7771        | 1        | 5         | 44           | 6        | R.LPPEQILLRWFNHYHLR.N                                              |
| <a href="#">10606</a> | 705.3589         | 2113.0547        | 2112.1150        | 0.9397        | 1        | 3         | 65           | 10       | K.LGATIWLVPEDICQVRSR.L                                             |
| <a href="#">11843</a> | <b>1143.7746</b> | <b>2285.5347</b> | <b>2284.1773</b> | <b>1.3574</b> | <b>1</b> | <b>8</b>  | <b>19</b>    | <b>1</b> | <b>R.SFKDQSIGSGIFLLDVLNGMK.S</b>                                   |
| <a href="#">12292</a> | 784.3982         | 2350.1727        | 2350.2856        | -0.1129       | 2        | 5         | 41           | 3        | K.LINDSVPDTIDERVLNKPGKK.I                                          |
| <a href="#">13993</a> | 869.6112         | 2605.8117        | 2606.2958        | -0.4841       | 1        | 2         | 74           | 4        | K.IIPGSVNRHVRNPPTSGGEMMR.F                                         |
| <a href="#">14960</a> | 931.6992         | 2792.0757        | 2793.4555        | -1.3798       | 2        | 4         | 40           | 6        | R.GPLQTQDLLQRAEQVLANADKLGCR.K <a href="#">14961</a>                |
| <a href="#">15263</a> | 968.8679         | 2903.5817        | 2903.4481        | 0.1337        | 2        | 1         | 89           | 6        | K.DITNTLSSLAQRMGKHEITDLEMIR.W                                      |
| <a href="#">15472</a> | 1005.2115        | 3012.6127        | 3011.5967        | 1.0160        | 2        | 3         | 57           | 2        | K.IDIKLHPELYRLLLEEDETLEQFLR.L <a href="#">15475</a>                |

351. [gi|220689881|gb|EED46231.1|](#) Mass: 107446 Score: 61 Queries matched: 14 empAI: 0.06

conserved hypothetical protein [Aspergillus flavus NRRL3357]

| Query                 | Observed         | Mr(expt)         | Mr(calc)         | Delta         | Miss     | Score     | Expect        | Rank     | Peptide                                                      |
|-----------------------|------------------|------------------|------------------|---------------|----------|-----------|---------------|----------|--------------------------------------------------------------|
| <a href="#">661</a>   | 477.3661         | 952.7177         | 951.5865         | 1.1312        | 0        | 9         | 17            | 5        | K.LLLGAVNPR.D                                                |
| <a href="#">1360</a>  | 551.1806         | 1100.3467        | 1101.5567        | -1.2100       | 0        | 0         | 1.7e+02       | 6        | R.VLGWSANNK.T                                                |
| <a href="#">5138</a>  | 524.6342         | 1570.8807        | 1570.8175        | 0.0632        | 1        | 3         | 72            | 9        | R.QNVSRSAADNGLLR.A                                           |
| <a href="#">9762</a>  | <b>672.7769</b>  | <b>2015.3087</b> | <b>2014.0517</b> | <b>1.2570</b> | <b>0</b> | <b>48</b> | <b>0.0022</b> | <b>1</b> | <b>R.ITQSEMTVVSSVSHAILGR.W <a href="#">9767</a></b>          |
| <a href="#">9913</a>  | 678.6622         | 2032.9647        | 2030.0466        | 2.9181        | 0        | (8)       | 22            | 2        | R.ITQSEMTVVSSVSHAILGR.W                                      |
| <a href="#">11166</a> | 1096.5806        | 2191.1467        | 2191.2252        | -0.0785       | 1        | 2         | 82            | 5        | R.SVLYKYLNPNLILATAVGDK.S <a href="#">11185</a>               |
| <a href="#">11258</a> | 1100.9981        | 2199.9817        | 2199.1059        | 0.8758        | 0        | 3         | 65            | 4        | R.ILTSFVTDEVSNLDSFGISR.Q                                     |
| <a href="#">11416</a> | 741.9639         | 2222.8697        | 2223.1081        | -0.2384       | 2        | 2         | 86            | 3        | R.RRMNWNINISIMTWLPF.- <a href="#">11415</a>                  |
| <a href="#">13156</a> | 826.0002         | 2474.9787        | 2475.3705        | -0.3918       | 1        | 0         | 1.1e+02       | 7        | -.MRLQATLLLLASCVPALAIYR.D                                    |
| <a href="#">15456</a> | <b>1000.1375</b> | <b>2997.3907</b> | <b>2996.5026</b> | <b>0.8881</b> | <b>1</b> | <b>4</b>  | <b>38</b>     | <b>1</b> | <b>K.DANVYFTRITQSEMTVVSSVSHAILGR.W <a href="#">15457</a></b> |

352. [gi|220693660|gb|EED50005.1|](#) Mass: 17860 Score: 61 Queries matched: 3 empAI: 0.19

conserved hypothetical protein [Aspergillus flavus NRRL3357]

| Query                | Observed        | Mr(expt)         | Mr(calc)         | Delta         | Miss     | Score     | Expect         | Rank     | Peptide                   |
|----------------------|-----------------|------------------|------------------|---------------|----------|-----------|----------------|----------|---------------------------|
| <a href="#">1256</a> | 541.2201        | 1080.4257        | 1079.6451        | 0.7806        | 1        | 6         | 36             | 7        | R.LNAHGVLKTK.D            |
| <a href="#">3332</a> | <b>686.3221</b> | <b>1370.6297</b> | <b>1368.7361</b> | <b>1.8936</b> | <b>0</b> | <b>61</b> | <b>0.00013</b> | <b>1</b> | <b>R.VNIDAPLAVGSASR.S</b> |
| <a href="#">4791</a> | <b>513.5515</b> | <b>1537.6327</b> | <b>1536.7936</b> | <b>0.8391</b> | <b>0</b> | <b>29</b> | <b>0.16</b>    | <b>1</b> | <b>R.FNIESGKPVVEYR.V</b>  |

353. [gi|220693774|gb|EED50119.1|](#) Mass: 68768 Score: 61 Queries matched: 8 emPAI: 0.05

RNase L inhibitor of the ABC superfamily, putative [Aspergillus flavus NRRL3357]

| Query                 | Observed        | Mr(expt)         | Mr(calc)         | Delta         | Miss     | Score     | Expect         | Rank     | Peptide                                                               |
|-----------------------|-----------------|------------------|------------------|---------------|----------|-----------|----------------|----------|-----------------------------------------------------------------------|
| <a href="#">2550</a>  | 644.6316        | 1287.2487        | 1287.7485        | -0.4998       | 2        | 3         | 78             | 5        | R.VIKRFIMHTK.K                                                        |
| <a href="#">9055</a>  | <b>964.1236</b> | <b>1926.2327</b> | <b>1925.9339</b> | <b>0.2988</b> | <b>0</b> | <b>61</b> | <b>0.00012</b> | <b>1</b> | <b>R.AQMDNMEHILDVLELR.Q</b>                                           |
| <a href="#">10647</a> | 707.6702        | 2119.9887        | 2121.0897        | -1.1010       | 2        | 1         | 95             | 8        | K.IAFISERLCIGCGICPKK.C                                                |
| <a href="#">14163</a> | 880.5125        | 2638.5157        | 2640.2350        | -1.7193       | 2        | 3         | 58             | 4        | R.DPNSYRPRINKYQSQMDQEQK.L <a href="#">14167</a> <a href="#">14172</a> |
| <a href="#">14301</a> | 887.2652        | 2658.7737        | 2658.2748        | 0.4990        | 2        | 8         | 16             | 4        | R.LAEAGDEFVNRDRAFTYPSMEK.T                                            |
| <a href="#">15453</a> | <b>999.7092</b> | <b>2996.1057</b> | <b>2993.4555</b> | <b>2.6502</b> | <b>1</b> | <b>3</b>  | <b>46</b>      | <b>3</b> | <b>R.FAIGLVCVQKADVVMFDEPSSYLDVK.Q</b>                                 |

354. [gi|220698304|gb|EED54644.1|](#) Mass: 44331 Score: 61 Queries matched: 11 emPAI: 0.07

60S ribosomal protein L3 [Aspergillus flavus NRRL3357]

| Query                 | Observed         | Mr(expt)         | Mr(calc)         | Delta          | Miss     | Score     | Expect       | Rank     | Peptide                                                       |
|-----------------------|------------------|------------------|------------------|----------------|----------|-----------|--------------|----------|---------------------------------------------------------------|
| <a href="#">2769</a>  | 657.5946         | 1313.1747        | 1311.7187        | 1.4561         | 0        | 8         | 28           | 3        | K.YLLPSPPEAAR.E                                               |
| <a href="#">3306</a>  | <b>685.2311</b>  | <b>1368.4477</b> | <b>1366.7034</b> | <b>1.7444</b>  | <b>0</b> | <b>17</b> | <b>2.8</b>   | <b>1</b> | <b>K.GWYLYSPLNVR.V</b> <a href="#">3304</a>                   |
| <a href="#">7383</a>  | 880.3676         | 1758.7207        | 1757.8849        | 0.8358         | 0        | 61        | 0.00012      | 1        | R.HLNISDLFNFSQPAR.D                                           |
| <a href="#">11838</a> | <b>762.6949</b>  | <b>2285.0627</b> | <b>2286.1790</b> | <b>-1.1163</b> | <b>2</b> | <b>6</b>  | <b>28</b>    | <b>1</b> | <b>R.LCARENFEPPVAKIISSETGR.K</b>                              |
| <a href="#">12063</a> | <b>772.5809</b>  | <b>2314.7207</b> | <b>2315.1618</b> | <b>-0.4411</b> | <b>0</b> | <b>1</b>  | <b>1e+02</b> | <b>7</b> | <b>R.VLPGTDVNAAGPVTGTERPNEHR.K</b> <a href="#">12079</a>      |
| <a href="#">12161</a> | 776.9305         | 2327.7697        | 2328.1460        | -0.3763        | 0        | 4         | 57           | 6        | K.EWGVEMAAPVGGVDPGLLQFK.R                                     |
| <a href="#">13667</a> | 848.0552         | 2541.1437        | 2541.3739        | -0.2301        | 1        | 1         | 1e+02        | 10       | R.LPLTVIFAAMYAVVGPKSLAAMAK.E                                  |
| <a href="#">15506</a> | <b>1011.7335</b> | <b>3032.1787</b> | <b>3032.4987</b> | <b>-0.3200</b> | <b>1</b> | <b>4</b>  | <b>39</b>    | <b>1</b> | <b>K.SLAAMAKEWGVEMAAPVGGVDPGLLQFK.R</b> <a href="#">15507</a> |

355. [gi|220700181|gb|EED56520.1|](#) Mass: 31757 Score: 59 Queries matched: 7 emPAI: 0.22

proteasome subunit alpha type 3, putative [Aspergillus flavus NRRL3357]

| Query                 | Observed         | Mr(expt)         | Mr(calc)         | Delta          | Miss     | Score     | Expect         | Rank     | Peptide                           |
|-----------------------|------------------|------------------|------------------|----------------|----------|-----------|----------------|----------|-----------------------------------|
| <a href="#">679</a>   | 479.9816         | 957.9487         | 958.4971         | -0.5484        | 0        | 11        | 14             | 10       | K.QLLEEAEK.A                      |
| <a href="#">1418</a>  | <b>555.7696</b>  | <b>1109.5247</b> | <b>1109.6193</b> | <b>-0.0946</b> | <b>0</b> | <b>22</b> | <b>1.1</b>     | <b>1</b> | <b>K.GPIPVSAISNR.L</b>            |
| <a href="#">2761</a>  | <b>657.0796</b>  | <b>1312.1447</b> | <b>1310.6255</b> | <b>1.5192</b>  | <b>1</b> | <b>6</b>  | <b>38</b>      | <b>4</b> | <b>R.DEAASWRSVYK.G</b>            |
| <a href="#">3389</a>  | <b>688.6636</b>  | <b>1375.3127</b> | <b>1375.7572</b> | <b>-0.4445</b> | <b>0</b> | <b>58</b> | <b>0.00027</b> | <b>1</b> | <b>R.HVGIVSAGLVPDGR.H</b>         |
| <a href="#">12330</a> | <b>1179.8726</b> | <b>2357.7307</b> | <b>2355.2580</b> | <b>2.4727</b>  | <b>2</b> | <b>1</b>  | <b>1e+02</b>   | <b>7</b> | <b>K.AVENGTAIGIRCKDGVVLAVEK.I</b> |
| <a href="#">12874</a> | <b>812.9009</b>  | <b>2435.6807</b> | <b>2435.1063</b> | <b>0.5744</b>  | <b>1</b> | <b>7</b>  | <b>26</b>      | <b>1</b> | <b>K.DKDFELEMSSWISLDGPTHGR.H</b>  |
| <a href="#">13574</a> | 843.4129         | 2527.2167        | 2527.3493        | -0.1326        | 2        | 1         | 1.1e+02        | 4        | K.AELEKLDLSSGNLSLVDAVKEAAR.I      |

356. [gi|220698578|gb|EED54918.1|](#) Mass: 41800 Score: 59 Queries matched: 7 emPAI: 0.16

aminotransferase, class V, putative [Aspergillus flavus NRRL3357]

| Query                | Observed         | Mr(expt)         | Mr(calc)         | Delta         | Miss     | Score     | Expect        | Rank     | Peptide                     |
|----------------------|------------------|------------------|------------------|---------------|----------|-----------|---------------|----------|-----------------------------|
| <a href="#">1758</a> | <b>1171.9220</b> | <b>1170.9147</b> | <b>1170.6608</b> | <b>0.2539</b> | <b>1</b> | <b>3</b>  | <b>91</b>     | <b>3</b> | <b>R.KDIDNAIAALK.E</b>      |
| <a href="#">6346</a> | 557.3169         | 1668.9287        | 1667.9471        | 0.9816        | 2        | 8         | 24            | 2        | K.RGVIFAAGLHKEAATK.Y        |
| <a href="#">6387</a> | <b>836.4761</b>  | <b>1670.9377</b> | <b>1668.8691</b> | <b>2.0686</b> | <b>0</b> | <b>44</b> | <b>0.0061</b> | <b>1</b> | <b>K.AIGCPPGLSILMTSPR.A</b> |

|                       |           |           |           |        |   |    |         |   |                                            |
|-----------------------|-----------|-----------|-----------|--------|---|----|---------|---|--------------------------------------------|
| <a href="#">7584</a>  | 592.5899  | 1774.7477 | 1772.8978 | 1.8499 | 1 | 1  | 1.2e+02 | 9 | K.DIDNAIAALKEAMAEAK.Q                      |
| <a href="#">8941</a>  | 638.9302  | 1913.7687 | 1912.9894 | 0.7793 | 0 | 42 | 0.0086  | 1 | K.APIGERPSFEEIEQALK.E <a href="#">8977</a> |
| <a href="#">16211</a> | 1121.5942 | 3361.7607 | 3360.6085 | 1.1522 | 0 | 16 | 2.5     | 1 | K.GENALVLHTGYFADSFATCLQTYGANATQLK.A        |

357. [gi|220697943|gb|EED54283.1|](#) Mass: 52045 Score: 58 Queries matched: 6 emPAI: 0.06

aldehyde dehydrogenase family protein, putative [Aspergillus flavus NRRL3357]

| Query                 | Observed | Mr(expt)  | Mr(calc)  | Delta   | Miss | Score | Expect  | Rank | Peptide                             |
|-----------------------|----------|-----------|-----------|---------|------|-------|---------|------|-------------------------------------|
| <a href="#">611</a>   | 465.8936 | 929.7727  | 928.5593  | 1.2134  | 1    | 2     | 1.3e+02 | 3    | R.ALDILEKK.K <a href="#">612</a>    |
| <a href="#">1062</a>  | 523.4381 | 1044.8617 | 1045.5629 | -0.7011 | 1    | 12    | 12      | 7    | K.NSGRGVTLSR.F                      |
| <a href="#">1697</a>  | 580.5296 | 1159.0447 | 1158.6033 | 0.4414  | 0    | 58    | 0.00027 | 1    | R.IPEVAQEA <del>FR</del> .S         |
| <a href="#">5568</a>  | 537.2475 | 1608.7207 | 1607.8631 | 0.8576  | 1    | 3     | 77      | 5    | R.AKDTIQAHVADAIQK.G                 |
| <a href="#">10988</a> | 722.7919 | 2165.3537 | 2166.1433 | -0.7896 | 2    | 0     | 1.2e+02 | 10   | R.IPEVAQEA <del>FRSFR</del> STTLK.Q |

358. [gi|220697660|gb|EED54001.1|](#) Mass: 40101 Score: 58 Queries matched: 12 emPAI: 0.08

casein kinase II beta subunit CKB1 [Aspergillus flavus NRRL3357]

| Query                 | Observed | Mr(expt)  | Mr(calc)  | Delta   | Miss | Score | Expect  | Rank | Peptide                                                            |
|-----------------------|----------|-----------|-----------|---------|------|-------|---------|------|--------------------------------------------------------------------|
| <a href="#">1642</a>  | 382.5445 | 1144.6117 | 1143.6335 | 0.9782  | 2    | 15    | 5.9     | 10   | R.TGPRMKWLR.M                                                      |
| <a href="#">6528</a>  | 841.5241 | 1681.0337 | 1678.8712 | 2.1625  | 0    | 1     | 1.2e+02 | 3    | R.YITSRPGIQQMLEK.Y <a href="#">6523</a>                            |
| <a href="#">9262</a>  | 652.0962 | 1953.2667 | 1953.8713 | -0.6046 | 0    | 1     | 1.1e+02 | 3    | K.LFCPSCQDLYTPNSR.F                                                |
| <a href="#">11619</a> | 752.5055 | 2254.4947 | 2252.0565 | 2.4382  | 1    | 7     | 26      | 1    | R.MKPTDVEELNEMARYEAAR.R                                            |
| <a href="#">12450</a> | 793.2362 | 2376.6867 | 2376.0135 | 0.6732  | 0    | 0     | 1.2e+02 | 9    | R.EADNDGDTEMGAAPAGGAQNSAI <del>AK</del> .R                         |
| <a href="#">12605</a> | 801.2369 | 2400.6887 | 2399.2696 | 1.4191  | 0    | 47    | 0.0024  | 1    | R.VASDLSVIESSAELLYGLIHQR.Y <a href="#">12599</a>                   |
| <a href="#">13635</a> | 846.0322 | 2535.0747 | 2532.1146 | 2.9601  | 1    | 5     | 41      | 3    | R.EADNDGDTEMGAAPAGGAQNSAI <del>AKR</del> .K                        |
| <a href="#">14316</a> | 887.8535 | 2660.5387 | 2660.2096 | 0.3291  | 2    | 3     | 55      | 9    | R.EADNDGDTEMGAAPAGGAQNSAI <del>AKR</del> K.K <a href="#">14296</a> |
| <a href="#">15290</a> | 975.7279 | 2924.1617 | 2925.3659 | -1.2042 | 2    | 2     | 60      | 2    | K.YEMQHFVGCPRVYCNGCKVLPVGR.S                                       |

359. [gi|220699758|gb|EED56097.1|](#) Mass: 14061 Score: 58 Queries matched: 22 emPAI: 1.38

60S ribosomal protein L31e [Aspergillus flavus NRRL3357]

| Query                | Observed  | Mr(expt)  | Mr(calc)  | Delta   | Miss | Score | Expect | Rank | Peptide                                                                                      |
|----------------------|-----------|-----------|-----------|---------|------|-------|--------|------|----------------------------------------------------------------------------------------------|
| <a href="#">573</a>  | 917.5710  | 916.5637  | 916.4978  | 0.0659  | 0    | 33    | 0.1    | 1    | R.SAIADVSR.E <a href="#">570</a> <a href="#">572</a> <a href="#">574</a> <a href="#">581</a> |
| <a href="#">635</a>  | 472.0851  | 942.1557  | 942.5399  | -0.3842 | 1    | 7     | 32     | 5    | K.RLHGVSFK.K                                                                                 |
| <a href="#">728</a>  | 968.4610  | 967.4537  | 967.4645  | -0.0107 | 0    | 8     | 24     | 7    | -MSTTVQTGK.K <a href="#">715</a>                                                             |
| <a href="#">1193</a> | 535.2906  | 1068.5667 | 1068.5088 | 0.0580  | 0    | 22    | 0.85   | 1    | K.GLHTAVVDEE.- <a href="#">1195</a>                                                          |
| <a href="#">1235</a> | 1077.3320 | 1076.3247 | 1075.4781 | 0.8466  | 1    | 5     | 55     | 3    | R.NDEENAKEK.L                                                                                |
| <a href="#">1423</a> | 556.9916  | 1111.9687 | 1110.5492 | 1.4196  | 1    | 6     | 45     | 5    | K.AFTERAMGTK.D                                                                               |
| <a href="#">2535</a> | 1286.9950 | 1285.9877 | 1285.6740 | 0.3137  | 0    | (18)  | 2.7    | 1    | K.LYSMVYAVNVK.E <a href="#">2540</a>                                                         |
| <a href="#">2683</a> | 652.0961  | 1302.1777 | 1301.6689 | 0.5088  | 0    | 46    | 0.0041 | 1    | K.LYSMVYAVNVK.E <a href="#">2672</a> <a href="#">2685</a> <a href="#">2691</a>               |
| <a href="#">2921</a> | 665.6021  | 1329.1897 | 1328.7524 | 0.4373  | 2    | 4     | 74     | 2    | K.KQSAIADVSR.E                                                                               |
| <a href="#">6030</a> | 823.3216  | 1644.6287 | 1643.8665 | 0.7623  | 2    | 6     | 43     | 1    | R.AMGTKDVRIDPALNK.K <a href="#">6019</a> <a href="#">6035</a>                                |

---

360. [gi|220699360|gb|EED55699.1|](#) **Mass:** 90472 **Score:** 57 **Queries matched:** 12 **empAI:** 0.11  
 proliferating cell nuclear antigen (PCNA) [Aspergillus flavus NRRL3357]

| Query                 | Observed         | Mr(expt)         | Mr(calc)         | Delta         | Miss     | Score     | Expect       | Rank     | Peptide                                                       |
|-----------------------|------------------|------------------|------------------|---------------|----------|-----------|--------------|----------|---------------------------------------------------------------|
| <a href="#">409</a>   | 867.5030         | 866.4957         | 866.4385         | 0.0572        | 0        | 8         | 23           | 5        | R.LSEYDIK.L                                                   |
| <a href="#">601</a>   | 464.0951         | 926.1757         | 925.4294         | 0.7464        | 0        | 11        | 10           | 8        | K.AEGFSPYR.C                                                  |
| <a href="#">1445</a>  | 1116.4290        | 1115.4217        | 1115.5683        | -0.1466       | 1        | 4         | 64           | 5        | R.LEDQAQTRR.C                                                 |
| <a href="#">1635</a>  | 572.6161         | 1143.2177        | 1140.6615        | 2.5563        | 1        | 7         | 37           | 5        | R.AKQAAALLEAR.L                                               |
| <a href="#">3176</a>  | <b>679.2686</b>  | <b>1356.5227</b> | <b>1354.8184</b> | <b>1.7043</b> | <b>0</b> | <b>32</b> | <b>0.094</b> | <b>1</b> | <b>R.NIALGINLVSLTK.V</b>                                      |
| <a href="#">3769</a>  | 475.5265         | 1423.5577        | 1421.7263        | 1.8315        | 1        | 6         | 34           | 4        | R.ATEDQYSLRALR.T                                              |
| <a href="#">5353</a>  | 795.9661         | 1589.9177        | 1587.8355        | 2.0822        | 0        | 10        | 17           | 2        | R.DLNALSESVVIEATK.E <a href="#">5314</a> <a href="#">5315</a> |
| <a href="#">13574</a> | <b>843.4129</b>  | <b>2527.2167</b> | <b>2525.3312</b> | <b>1.8855</b> | <b>0</b> | <b>45</b> | <b>0.004</b> | <b>1</b> | <b>K.VSLCLSQEVPLLVEYGLGSGHLR.F</b>                            |
| <a href="#">15609</a> | 1020.8192        | 3059.4357        | 3058.4196        | 1.0161        | 0        | 1         | 87           | 9        | M.ESLVYENSPLADYLQGEHEHDPSPVK.E                                |
| <a href="#">16154</a> | <b>1112.7745</b> | <b>3335.3017</b> | <b>3333.5533</b> | <b>1.7484</b> | <b>0</b> | <b>23</b> | <b>0.46</b>  | <b>1</b> | <b>K.LMDIDQEH LAIPET EYAATVEMP SAEFQR.I</b>                   |

---

361. [gi|220690750|gb|EED47099.1|](#) **Mass:** 64173 **Score:** 57 **Queries matched:** 21 **empAI:** 0.05  
 methylmalonate-semialdehyde dehydrogenase, putative [Aspergillus flavus NRRL3357]

| Query                 | Observed        | Mr(expt)         | Mr(calc)         | Delta          | Miss     | Score      | Expect         | Rank     | Peptide                                        |
|-----------------------|-----------------|------------------|------------------|----------------|----------|------------|----------------|----------|------------------------------------------------|
| <a href="#">233</a>   | 800.5750        | 799.5677         | 799.4552         | 0.1125         | 0        | 17         | 3.6            | 4        | R.VQANLGAK.N <a href="#">232</a>               |
| <a href="#">2157</a>  | <b>623.1776</b> | <b>1244.3407</b> | <b>1243.6772</b> | <b>0.6636</b>  | <b>1</b> | <b>2</b>   | <b>1.2e+02</b> | <b>3</b> | <b>K.RIEDLIASAEK.E</b>                         |
| <a href="#">2658</a>  | <b>650.5326</b> | <b>1299.0507</b> | <b>1298.6904</b> | <b>0.3603</b>  | <b>0</b> | <b>57</b>  | <b>0.00035</b> | <b>1</b> | <b>R.DPGAAMILAELAK.E</b>                       |
| <a href="#">2773</a>  | 657.6781        | 1313.3417        | 1314.6853        | -1.3436        | 0        | (8)        | 27             | 5        | R.DPGAAMILAELAK.E                              |
| <a href="#">3499</a>  | <b>463.8619</b> | <b>1388.5637</b> | <b>1387.7823</b> | <b>0.7814</b>  | <b>1</b> | <b>6</b>   | <b>45</b>      | <b>8</b> | <b>K.ILLDGRGYKPEK.Y</b>                        |
| <a href="#">4209</a>  | <b>737.3736</b> | <b>1472.7327</b> | <b>1472.7722</b> | <b>-0.0395</b> | <b>1</b> | <b>4</b>   | <b>66</b>      | <b>2</b> | <b>R.IEDLIASAEKEGAK.I <a href="#">4202</a></b> |
| <a href="#">4388</a>  | 747.2191        | 1492.4237        | 1490.7816        | 1.6421         | 1        | 1          | 1.1e+02        | 5        | K.AFPAWRAMSVIAR.Q                              |
| <a href="#">4675</a>  | 763.4206        | 1524.8267        | 1524.8486        | -0.0219        | 1        | 10         | 14             | 2        | R.QQIMFKFVSLIR.A                               |
| <a href="#">4751</a>  | <b>767.7986</b> | <b>1533.5827</b> | <b>1530.7018</b> | <b>2.8810</b>  | <b>0</b> | <b>5</b>   | <b>50</b>      | <b>5</b> | <b>R.SLMTASMSSSSALAR.R</b>                     |
| <a href="#">6163</a>  | <b>552.4255</b> | <b>1654.2547</b> | <b>1651.8682</b> | <b>2.3865</b>  | <b>0</b> | <b>4</b>   | <b>54</b>      | <b>3</b> | <b>K.EAGFPAGVVNIVHGSAK.T</b>                   |
| <a href="#">7574</a>  | 887.8536        | 1773.6927        | 1771.9217        | 1.7711         | 1        | 4          | 54             | 6        | R.ANWDRLAASITLEQGK.T                           |
| <a href="#">9309</a>  | <b>654.3642</b> | <b>1960.0707</b> | <b>1957.9592</b> | <b>2.1115</b>  | <b>1</b> | <b>1</b>   | <b>1.2e+02</b> | <b>7</b> | <b>R.VPQSTDEELRAAVESA.E</b>                    |
| <a href="#">9665</a>  | 668.6535        | 2002.9387        | 2000.9619        | 1.9768         | 1        | 2          | 85             | 7        | R.SATSRSLMTASMSSSSALAR.R                       |
| <a href="#">9784</a>  | <b>673.8219</b> | <b>2018.4437</b> | <b>2016.9568</b> | <b>1.4869</b>  | <b>1</b> | <b>(1)</b> | <b>1.1e+02</b> | <b>5</b> | <b>R.SATSRSLMTASMSSSSALAR.R</b>                |
| <a href="#">11707</a> | 757.6485        | 2269.9237        | 2269.2439        | 0.6798         | 2        | 1          | 1.1e+02        | 10       | R.AMSVIARQQIMFKFVSLIR.A                        |
| <a href="#">12171</a> | <b>777.4405</b> | <b>2329.2997</b> | <b>2331.2546</b> | <b>-1.9549</b> | <b>2</b> | <b>1</b>   | <b>91</b>      | <b>3</b> | <b>R.LAASITLEQGKTFADARGD.VLR.G</b>             |
| <a href="#">12801</a> | <b>810.0785</b> | <b>2427.2137</b> | <b>2427.2281</b> | <b>-0.0144</b> | <b>1</b> | <b>2</b>   | <b>72</b>      | <b>1</b> | <b>K.ALNVNGGFEEGADLGPVISPEK.R</b>              |
| <a href="#">14125</a> | 877.3015        | 2628.8827        | 2626.3602        | 2.5225         | 2        | 4          | 49             | 2        | R.AKALNVNGGFEEGADLGPVISPEK.R                   |
| <a href="#">15754</a> | 1040.9625       | 3119.8657        | 3119.5479        | 0.3179         | 1        | 0          | 93             | 9        | R.GLQVAETACGITTQLTGEVLEVAKDMETR.S              |

---

362. [gi|220692901|gb|EED49247.1|](#) Mass: 40176 Score: 55 Queries matched: 9 emPAI: 0.17

disulfide isomerase (TigA), putative [Aspergillus flavus NRRL3357]

| Query                 | Observed        | Mr(expt)         | Mr(calc)         | Delta          | Miss | Score | Expect  | Rank | Peptide                                                                                |
|-----------------------|-----------------|------------------|------------------|----------------|------|-------|---------|------|----------------------------------------------------------------------------------------|
| <a href="#">641</a>   | <b>945.9070</b> | <b>944.8997</b>  | <b>945.4403</b>  | <b>-0.5406</b> | 0    | 31    | 0.17    | 1    | <b>K.VDAEAENAK.A</b>                                                                   |
| <a href="#">2079</a>  | 617.6791        | 1233.3437        | 1234.7074        | -1.3637        | 1    | 0     | 1.7e+02 | 9    | K.KFGIQGFPTLK.W                                                                        |
| <a href="#">3806</a>  | <b>714.8081</b> | <b>1427.6017</b> | <b>1426.6616</b> | <b>0.9401</b>  | 0    | 42    | 0.01    | 1    | <b>R.SEEAFVEFVNEK.A</b> <a href="#">3800</a> <a href="#">3804</a> <a href="#">3810</a> |
| <a href="#">9171</a>  | <b>648.2782</b> | <b>1941.8127</b> | <b>1942.8652</b> | <b>-1.0525</b> | 2    | 3     |         | 69   | <b>R.QFLSQEKADMDMKDEL.-</b>                                                            |
| <a href="#">12608</a> | 801.2705        | 2400.7897        | 2398.1210        | 2.6687         | 1    | 5     |         | 35   | K.QEPSEVEMLTDSSFKTTIGGDK.D <a href="#">12591</a>                                       |

363. [gi|220698099|gb|EED54439.1|](#) Mass: 30185 Score: 55 Queries matched: 7 emPAI: 0.11

26S proteasome regulatory subunit S5A [Aspergillus flavus NRRL3357]

| Query                 | Observed        | Mr(expt)         | Mr(calc)         | Delta          | Miss | Score | Expect | Rank | Peptide                                                |
|-----------------------|-----------------|------------------|------------------|----------------|------|-------|--------|------|--------------------------------------------------------|
| <a href="#">78</a>    | <b>691.9480</b> | <b>690.9407</b>  | <b>690.3184</b>  | <b>0.6223</b>  | 1    | 7     |        | 44   | <b>K.KEDGDK.M</b>                                      |
| <a href="#">8068</a>  | 607.1489        | 1818.4247        | 1816.8746        | 1.5501         | 1    | 9     |        | 20   | K.MRVHPQSAVGLMSMGK.G                                   |
| <a href="#">10230</a> | <b>688.4409</b> | <b>2062.3007</b> | <b>2063.0423</b> | <b>-0.7415</b> | 0    | 6     |        | 37   | <b>K.INVSIDVIAFGDLESQTK.K</b>                          |
| <a href="#">11140</a> | <b>730.3592</b> | <b>2188.0557</b> | <b>2187.1324</b> | <b>0.9233</b>  | 0    | 43    | 0.0061 | 1    | <b>K.GPEVLSTFTSDFGAILAGLHR.T</b> <a href="#">11135</a> |
| <a href="#">13099</a> | <b>823.7369</b> | <b>2468.1887</b> | <b>2466.2676</b> | <b>1.9211</b>  | 2    | 2     |        | 77   | <b>K.MKKINVSIDVIAFGDLESQTK.K</b> <a href="#">13093</a> |

364. [gi|220696140|gb|EED52482.1|](#) Mass: 116943 Score: 55 Queries matched: 23 emPAI: 0.09

glycine dehydrogenase [Aspergillus flavus NRRL3357]

| Query                 | Observed         | Mr(expt)         | Mr(calc)         | Delta          | Miss | Score | Expect  | Rank  | Peptide                                                                    |
|-----------------------|------------------|------------------|------------------|----------------|------|-------|---------|-------|----------------------------------------------------------------------------|
| <a href="#">3</a>     | <b>603.4080</b>  | <b>602.4007</b>  | <b>602.3024</b>  | <b>0.0984</b>  | 0    | 13    |         | 12    | <b>K.AELDR.F</b>                                                           |
| <a href="#">425</a>   | <b>437.5196</b>  | <b>873.0247</b>  | <b>873.4920</b>  | <b>-0.4672</b> | 1    | 5     |         | 60    | <b>R.KQIDVSGK.T</b>                                                        |
| <a href="#">1653</a>  | 1148.1930        | 1147.1857        | 1146.5768        | 0.6089         | 0    | 19    |         | 2.2   | K.TSNLDLEDLK.A                                                             |
| <a href="#">1696</a>  | <b>580.3856</b>  | <b>1158.7567</b> | <b>1157.6808</b> | <b>1.0759</b>  | 0    | 35    | 0.06    | 1     | <b>K.LAALGYNVIK.T</b>                                                      |
| <a href="#">3506</a>  | <b>463.9869</b>  | <b>1388.9387</b> | <b>1389.7980</b> | <b>-0.8592</b> | 0    | 4     |         | 66    | <b>K.ITLLNANYILSR.L</b>                                                    |
| <a href="#">3706</a>  | 708.4281         | 1414.8417        | 1412.6895        | 2.1522         | 0    | 1     | 1.4e+02 | 6     | R.QEIAEVESGAQPR.E                                                          |
| <a href="#">5712</a>  | <b>810.7801</b>  | <b>1619.5457</b> | <b>1619.7692</b> | <b>-0.2235</b> | 0    | 33    | 0.074   | 1     | <b>K.APGEFGADIAFGNAQR.F</b> <a href="#">5727</a>                           |
| <a href="#">6269</a>  | 555.0185         | 1662.0337        | 1661.8712        | 0.1626         | 2    | 11    |         | 13    | R.CAHEFILDVRKFK.E                                                          |
| <a href="#">6281</a>  | <b>555.3255</b>  | <b>1662.9547</b> | <b>1662.8114</b> | <b>0.1433</b>  | 0    | 8     |         | 24    | <b>R.DLLSNEWNRPYTR.E</b>                                                   |
| <a href="#">9424</a>  | <b>988.2856</b>  | <b>1974.5567</b> | <b>1974.0020</b> | <b>0.5548</b>  | 0    | 36    | 0.033   | 1     | <b>K.EMLATLDPVVASLDEFVK.Q</b>                                              |
| <a href="#">9493</a>  | 992.2211         | 1982.4277        | 1982.0877        | 0.3400         | 0    | 7     |         | 26    | K.TYIGTGYGTIVPPVILR.N <a href="#">9494</a>                                 |
| <a href="#">9624</a>  | 999.7091         | 1997.4037        | 1996.9975        | 0.4062         | 0    | 1     | 1.1e+02 | 4     | K.AYVVSHLCHPQTIAVMR.S                                                      |
| <a href="#">10131</a> | <b>685.2312</b>  | <b>2052.6717</b> | <b>2053.0440</b> | <b>-0.3722</b> | 1    | 3     |         | 64    | <b>R.QEIAEVESGAQPREGNVLK.M</b> <a href="#">10122</a> <a href="#">10130</a> |
| <a href="#">13232</a> | <b>829.2645</b>  | <b>2484.7717</b> | <b>2482.2243</b> | <b>2.5474</b>  | 1    | 1     |         | 1e+02 | <b>K.RNICLIPVSAHGTPASAAMAGMK.V</b>                                         |
| <a href="#">14347</a> | 889.8975         | 2666.6707        | 2667.3254        | -0.6547        | 1    | 2     |         | 77    | K.HKDELAAVMITYPSTFGVYEPGVK.E                                               |
| <a href="#">15066</a> | 944.1335         | 2829.3787        | 2827.4174        | 1.9613         | 2    | 2     |         | 75    | K.TNLYRDNVGGGLGETDMLKLLLDVYR.K                                             |
| <a href="#">15258</a> | <b>968.6005</b>  | <b>2902.7797</b> | <b>2902.4503</b> | <b>0.3294</b>  | 2    | 0     |         | 98    | <b>R.YIRHLESKDLSLAHSMIPLGSCCTMK.L</b>                                      |
| <a href="#">15372</a> | <b>988.2855</b>  | <b>2961.8347</b> | <b>2963.4950</b> | <b>-1.6603</b> | 1    | 13    | 5.7     | 1     | <b>R.HIGPSPDAAKEMLATLDPVVASLDEFVK.Q</b>                                    |
| <a href="#">15571</a> | <b>1018.4399</b> | <b>3052.2977</b> | <b>3053.4772</b> | <b>-1.1795</b> | 0    | 15    | 3.3     | 1     | <b>K.ATSNICTAQALLANMSAMYAVYHGPTGLK.S</b>                                   |



365. [gi|220700026|gb|EED56365.1|](#) Mass: 67076 Score: 54 Queries matched: 9 emPAI: 0.05

phosphoenolpyruvate carboxykinase AcuF [Aspergillus flavus NRRL3357]

| Query                 | Observed  | Mr(expt)  | Mr(calc)  | Delta   | Miss | Score | Expect  | Rank | Peptide                                     |
|-----------------------|-----------|-----------|-----------|---------|------|-------|---------|------|---------------------------------------------|
| <a href="#">992</a>   | 515.6901  | 1029.3657 | 1028.5978 | 0.7679  | 2    | 9     | 24      | 3    | R.SPSDKRIVK.E                               |
| <a href="#">2099</a>  | 618.8401  | 1235.6657 | 1235.6258 | 0.0399  | 1    | 4     | 63      | 10   | R.ERAVDYLNTR.N                              |
| <a href="#">5568</a>  | 537.2475  | 1608.7207 | 1608.8017 | -0.0810 | 1    | 2     | 98      | 9    | R.VVCARAYHALFMR.N                           |
| <a href="#">6488</a>  | 840.1981  | 1678.3817 | 1677.8726 | 0.5091  | 0    | 54    | 0.00055 | 1    | R.FGSVLENVFDPISR.V                          |
| <a href="#">10732</a> | 711.3279  | 2130.9617 | 2129.0442 | 1.9175  | 2    | 2     | 88      | 7    | R.NRIYVIDGFAGWDERYR.I <a href="#">10736</a> |
| <a href="#">10882</a> | 717.2365  | 2148.6877 | 2149.1062 | -0.4185 | 1    | 2     | 75      | 4    | R.NMVATSVNRTALHPGGVQPGK.G                   |
| <a href="#">13651</a> | 846.8229  | 2537.4467 | 2537.3139 | 0.1328  | 1    | 0     | 1.1e+02 | 4    | K.ISQHKANAWLLNTGWVGAGATTGGK.R               |
| <a href="#">15904</a> | 1070.1725 | 3207.4957 | 3208.6262 | -1.1305 | 2    | 0     | 93      | 9    | K.EMVILGTEYAGEMKKGVFTVLFYEMPVK.H            |

366. [gi|220697448|gb|EED53789.1|](#) Mass: 20499 Score: 54 Queries matched: 9 emPAI: 0.16

mitochondrial hypoxia responsive domain protein [Aspergillus flavus NRRL3357]

| Query                 | Observed | Mr(expt)  | Mr(calc)  | Delta   | Miss | Score | Expect  | Rank | Peptide                                        |
|-----------------------|----------|-----------|-----------|---------|------|-------|---------|------|------------------------------------------------|
| <a href="#">6157</a>  | 552.1452 | 1653.4137 | 1654.8209 | -1.4072 | 2    | 3     | 73      | 8    | R.QRHAAMEAAAAEAGKK.T                           |
| <a href="#">7584</a>  | 592.5899 | 1774.7477 | 1773.7960 | 0.9517  | 2    | 6     | 34      | 1    | R.SMKAGDSVEMNRMFR.A <a href="#">7573</a>       |
| <a href="#">7777</a>  | 896.2206 | 1790.4267 | 1789.7909 | 0.6358  | 2    | (6)   | 37      | 7    | R.SMKAGDSVEMNRMFR.A                            |
| <a href="#">8507</a>  | 935.1996 | 1868.3847 | 1866.9183 | 1.4664  | 2    | 1     | 1.1e+02 | 4    | K.TAPHDAARSAIERSEEK.S                          |
| <a href="#">9087</a>  | 644.4872 | 1930.4397 | 1930.0371 | 0.4026  | 2    | 5     | 48      | 6    | R.SAIERSEEKSIGVLDVAVK.E                        |
| <a href="#">11681</a> | 756.2429 | 2265.7067 | 2264.1874 | 1.5193  | 1    | 38    | 0.02    | 1    | R.LKEEPLIPLGCAATSYALYR.A <a href="#">11682</a> |
| <a href="#">14389</a> | 891.2629 | 2670.7667 | 2669.1803 | 1.5864  | 0    | 2     | 72      | 5    | -.MSSDPVPSSEFEGNPQFEETSLSLQK.F                 |

367. [gi|220692210|gb|EED48557.1|](#) Mass: 16780 Score: 54 Queries matched: 7 emPAI: 0.20

40S ribosomal protein S26 [Aspergillus flavus NRRL3357]

| Query                 | Observed | Mr(expt)  | Mr(calc)  | Delta  | Miss | Score | Expect  | Rank | Peptide                                  |
|-----------------------|----------|-----------|-----------|--------|------|-------|---------|------|------------------------------------------|
| <a href="#">701</a>   | 482.3616 | 962.7087  | 962.5522  | 0.1565 | 2    | 7     | 35      | 4    | R.RNRAPPPR.I                             |
| <a href="#">915</a>   | 503.9706 | 1005.9267 | 1005.4913 | 0.4354 | 0    | 12    | 10      | 1    | R.NMVESAAIR.D                            |
| <a href="#">2226</a>  | 627.1851 | 1252.3557 | 1250.5318 | 1.8239 | 1    | 2     | 97      | 6    | R.CSNCARCVPK.D                           |
| <a href="#">5818</a>  | 814.7261 | 1627.4377 | 1626.7777 | 0.6600 | 0    | 52    | 0.00095 | 1    | R.DISDASVFTDYAVPK.M <a href="#">5831</a> |
| <a href="#">13904</a> | 861.8019 | 2582.3837 | 2580.2905 | 2.0932 | 2    | 3     | 64      | 7    | M.TGLAQPHHESPGASRQPNPTSQRK.A             |
| <a href="#">14081</a> | 873.3319 | 2616.9737 | 2614.2585 | 2.7153 | 1    | 1     | 95      | 4    | R.NMVESAAIRDISDASVFTDYAVPK.M             |

368. [gi|220701562|gb|EED57900.1|](#) Mass: 34827 Score: 54 Queries matched: 4 emPAI: 0.10

regulatory protein SUAPRGA1 [Aspergillus flavus NRRL3357]

| Query              | Observed | Mr(expt) | Mr(calc) | Delta  | Miss | Score | Expect | Rank | Peptide   |
|--------------------|----------|----------|----------|--------|------|-------|--------|------|-----------|
| <a href="#">14</a> | 635.4920 | 634.4847 | 634.3472 | 0.1375 | 0    | 5     | 59     | 5    | -.MLSLR.T |

[10662](#) **708.6729** **2122.9967** **2120.0273** **2.9694** **1** **9** **14** **1** **K.QSQAEGDFELAAKLEDELK.H**  
[13902](#) **861.7275** **2582.1607** **2581.2336** **0.9271** **0** **39** **0.015** **1** **R.QSLYAGPPFENLDEDLQTFLEK.Y** [13899](#)

369. [gi|220699124|gb|EED55463.1|](#) **Mass:** 49720 **Score:** 54 **Queries matched:** 9 **emPAI:** 0.07

saccharopine dehydrogenase Lys9, putative [Aspergillus flavus NRRL3357]

| Query                 | Observed        | Mr(expt)         | Mr(calc)         | Delta         | Miss     | Score     | Expect        | Rank     | Peptide                                                  |
|-----------------------|-----------------|------------------|------------------|---------------|----------|-----------|---------------|----------|----------------------------------------------------------|
| <a href="#">8042</a>  | 909.3371        | 1816.6597        | 1815.8648        | 0.7950        | 1        | 7         | 27            | 2        | R.DMVMLQHKFEIEHK.D <a href="#">8041</a>                  |
| <a href="#">9176</a>  | 648.5825        | 1942.7257        | 1940.8318        | 1.8939        | 0        | 2         | 81            | 3        | R.TSTMCEYGVIGGYSAMAK.T <a href="#">9173</a>              |
| <a href="#">9813</a>  | 675.0902        | 2022.2487        | 2022.8961        | -0.6474       | 1        | 3         | 60            | 8        | K.MQYGPPEERDMVMLQHK.F                                    |
| <a href="#">9867</a>  | 676.5959        | 2026.7657        | 2024.0877        | 2.6780        | 2        | 2         | 81            | 6        | K.TIVRGTLRYQGFPEMIK.V                                    |
| <a href="#">12149</a> | 1164.3561       | 2326.6977        | 2327.0232        | -0.3255       | 1        | 0         | 1.2e+02       | 5        | K.ETRTSTMCEYGVIGGYSAMAK.T                                |
| <a href="#">12989</a> | <b>819.3265</b> | <b>2454.9577</b> | <b>2453.3934</b> | <b>1.5644</b> | <b>0</b> | <b>48</b> | <b>0.0019</b> | <b>1</b> | <b>K.ALEQVDLAIISLIPYTFHALVIK.S</b> <a href="#">12991</a> |

370. [gi|220699549|gb|EED55888.1|](#) **Mass:** 109134 **Score:** 53 **Queries matched:** 19 **emPAI:** 0.03

SNARE-dependent exocytosis protein (Sro7), putative [Aspergillus flavus NRRL3357]

| Query                 | Observed         | Mr(expt)         | Mr(calc)         | Delta          | Miss     | Score     | Expect         | Rank      | Peptide                                          |
|-----------------------|------------------|------------------|------------------|----------------|----------|-----------|----------------|-----------|--------------------------------------------------|
| <a href="#">83</a>    | 702.3110         | 701.3037         | 700.3868         | 0.9170         | 0        | 8         | 35             | 8         | K.QNLAQK.Y                                       |
| <a href="#">280</a>   | 826.5550         | 825.5477         | 825.3361         | 0.2117         | 0        | 14        | 6              | 3         | K.MQEQMK.L                                       |
| <a href="#">499</a>   | 451.3476         | 900.6807         | 901.4882         | -0.8075        | 1        | 15        | 6.9            | 4         | R.SSFLRHR.S <a href="#">498</a>                  |
| <a href="#">630</a>   | 938.6990         | 937.6917         | 937.4361         | 0.2556         | 1        | 7         | 29             | 8         | K.KMQEQMK.L                                      |
| <a href="#">1364</a>  | <b>1101.9310</b> | <b>1100.9237</b> | <b>1100.5686</b> | <b>0.3551</b>  | <b>2</b> | <b>3</b>  | <b>87</b>      | <b>10</b> | <b>K.LEDQERR.L</b>                               |
| <a href="#">4426</a>  | <b>749.7906</b>  | <b>1497.5667</b> | <b>1497.7787</b> | <b>-0.2120</b> | <b>0</b> | <b>5</b>  | <b>50</b>      | <b>4</b>  | <b>K.GNGDDSGLLIAGGKPK.A</b>                      |
| <a href="#">5212</a>  | 527.2382         | 1578.6927        | 1579.6970        | -1.0043        | 1        | 2         | 95             | 7         | K.MQEQMKLEDQER.R                                 |
| <a href="#">5412</a>  | 799.1471         | 1596.2797        | 1595.6919        | 0.5878         | 1        | (0)       | 1.4e+02        | 3         | K.MQEQMKLEDQER.R                                 |
| <a href="#">5443</a>  | 534.2212         | 1599.6417        | 1599.8667        | -0.2250        | 2        | 5         | 44             | 7         | -.MAHFLRGKQAGIQK.D                               |
| <a href="#">7151</a>  | 579.8092         | 1736.4057        | 1734.7085        | 1.6972         | 1        | 7         | 27             | 7         | K.EMGCKEINYMADMK.R                               |
| <a href="#">7915</a>  | <b>602.5242</b>  | <b>1804.5507</b> | <b>1805.9498</b> | <b>-1.3991</b> | <b>1</b> | <b>5</b>  | <b>43</b>      | <b>5</b>  | <b>R.FCPVIALSFSPRDIGK.I</b> <a href="#">7943</a> |
| <a href="#">8983</a>  | 959.1546         | 1916.2947        | 1914.9548        | 1.3399         | 1        | 5         | 41             | 5         | R.FEDRNVITTAHADGTIR.L <a href="#">8982</a>       |
| <a href="#">9368</a>  | <b>984.6486</b>  | <b>1967.2827</b> | <b>1965.9320</b> | <b>1.3507</b>  | <b>0</b> | <b>53</b> | <b>0.00063</b> | <b>1</b>  | <b>K.DLSDGLSPDLFALDDFAR.Y</b>                    |
| <a href="#">11720</a> | <b>759.0389</b>  | <b>2274.0947</b> | <b>2271.2012</b> | <b>2.8935</b>  | <b>0</b> | <b>5</b>  | <b>44</b>      | <b>1</b>  | <b>K.HSQVGFVAAGFEGGSLVIIDLR.G</b>                |
| <a href="#">13382</a> | <b>836.1155</b>  | <b>2505.3247</b> | <b>2507.1929</b> | <b>-1.8681</b> | <b>0</b> | <b>1</b>  | <b>84</b>      | <b>2</b>  | <b>R.LWDVGHDDDEIENGDIQVDLAR.A</b>                |
| <a href="#">13856</a> | 858.5289         | 2572.5647        | 2574.4381        | -1.8734        | 0        | 0         | 1.1e+02        | 8         | K.VISIIPINAETGDLALATPNAVGLR.N                    |

371. [gi|220695582|gb|EED51925.1|](#) **Mass:** 33191 **Score:** 53 **Queries matched:** 16 **emPAI:** 0.21

pyridoxine biosynthesis protein [Aspergillus flavus NRRL3357]

| Query                | Observed        | Mr(expt)         | Mr(calc)         | Delta         | Miss     | Score     | Expect      | Rank     | Peptide                                       |
|----------------------|-----------------|------------------|------------------|---------------|----------|-----------|-------------|----------|-----------------------------------------------|
| <a href="#">2291</a> | 631.1161        | 1260.2177        | 1259.6761        | 0.5416        | 0        | 35        | 0.055       | 1        | R.ELEVPEYELLR.E <a href="#">2288</a>          |
| <a href="#">3091</a> | 450.3429        | 1348.0067        | 1347.7292        | 0.2775        | 2        | 1         | 1.3e+02     | 10       | R.RISEGAAMIRTK.G                              |
| <a href="#">3848</a> | <b>716.5616</b> | <b>1431.1087</b> | <b>1430.7513</b> | <b>0.3574</b> | <b>0</b> | <b>42</b> | <b>0.01</b> | <b>1</b> | <b>K.EIMEAVTIPVMAK.A</b> <a href="#">3841</a> |

|                       |                  |                  |                  |                |          |            |           |          |                                                          |
|-----------------------|------------------|------------------|------------------|----------------|----------|------------|-----------|----------|----------------------------------------------------------|
| <a href="#">4180</a>  | <b>1469.1470</b> | <b>1468.1397</b> | <b>1468.8038</b> | <b>-0.6641</b> | <b>1</b> | <b>7</b>   | <b>27</b> | <b>1</b> | <b>K.AIVQAVTHYKDPK.V</b>                                 |
| <a href="#">4557</a>  | 758.4056         | 1514.7967        | 1516.7555        | -1.9588        | 0        | 4          | 65        | 3        | R.IAEEAGAAAVMALER.V                                      |
| <a href="#">5710</a>  | <b>810.6466</b>  | <b>1619.2787</b> | <b>1616.8046</b> | <b>2.4742</b>  | <b>0</b> | <b>11</b>  | <b>11</b> | <b>1</b> | <b>R.AILQSSPDYEPELR.A</b>                                |
| <a href="#">6671</a>  | 846.0321         | 1690.0497        | 1689.8793        | 0.1704         | 1        | 1          | 1.1e+02   | 10       | K.EIMEAVTIPVMAKAR.I <a href="#">6655</a>                 |
| <a href="#">7023</a>  | 860.8326         | 1719.6507        | 1718.8345        | 0.8163         | 1        | 3          | 79        | 9        | K.APFVCGCRNLGREALR.R                                     |
| <a href="#">8277</a>  | <b>615.6542</b>  | <b>1843.9407</b> | <b>1843.9428</b> | <b>-0.0021</b> | <b>1</b> | <b>2</b>   | <b>79</b> | <b>9</b> | <b>R.ARAILQSSPDYEPELR.A</b>                              |
| <a href="#">12315</a> | <b>785.7579</b>  | <b>2354.2517</b> | <b>2352.1449</b> | <b>2.1069</b>  | <b>1</b> | <b>1</b>   | <b>98</b> | <b>4</b> | <b>R.MSDPSMIKEIMEAVTIPVMAK.A</b>                         |
| <a href="#">13889</a> | <b>861.0735</b>  | <b>2580.1987</b> | <b>2579.2831</b> | <b>0.9156</b>  | <b>2</b> | <b>8</b>   | <b>18</b> | <b>3</b> | <b>R.MSDPSMIKEIMEAVTIPVMAKAR.I <a href="#">13888</a></b> |
| <a href="#">13964</a> | <b>866.2682</b>  | <b>2595.7827</b> | <b>2595.2780</b> | <b>0.5047</b>  | <b>2</b> | <b>(1)</b> | <b>91</b> | <b>1</b> | <b>R.MSDPSMIKEIMEAVTIPVMAKAR.I</b>                       |

372. [gi|220699084|gb|EED55423.1|](#) Mass: 43958 Score: 53 Queries matched: 27 emPAI: 0.08

3-ketoacyl-coA thiolase peroxisomal A precursor [Aspergillus flavus NRRL3357]

| Query                 | Observed        | Mr(expt)         | Mr(calc)         | Delta          | Miss     | Score     | Expect         | Rank      | Peptide                                                                                                                              |
|-----------------------|-----------------|------------------|------------------|----------------|----------|-----------|----------------|-----------|--------------------------------------------------------------------------------------------------------------------------------------|
| <a href="#">367</a>   | 428.9971        | 855.9797         | 855.5542         | 0.4256         | 1        | 4         | 66             | 10        | R.LGQKIIGK.Y                                                                                                                         |
| <a href="#">1657</a>  | 575.3101        | 1148.6057        | 1149.6506        | -1.0449        | 2        | 5         | 58             | 2         | R.SALTKGGKGGFK.D <a href="#">1659</a>                                                                                                |
| <a href="#">1835</a>  | 1188.5650       | 1187.5577        | 1187.6510        | -0.0933        | 1        | 1         | 1.3e+02        | 8         | K.TITVKADDGIR.D <a href="#">1837</a>                                                                                                 |
| <a href="#">2716</a>  | <b>654.3976</b> | <b>1306.7807</b> | <b>1306.6261</b> | <b>0.1546</b>  | <b>0</b> | <b>21</b> | <b>1.2</b>     | <b>1</b>  | <b>K.VPMGVLSENMAK.D</b>                                                                                                              |
| <a href="#">3456</a>  | <b>693.1961</b> | <b>1384.3777</b> | <b>1384.6623</b> | <b>-0.2846</b> | <b>0</b> | <b>9</b>  | <b>20</b>      | <b>1</b>  | <b>R.AVQDAFAASSYQK.A</b>                                                                                                             |
| <a href="#">5721</a>  | 811.1211        | 1620.2277        | 1619.8559        | 0.3718         | 0        | 8         | 23             | 8         | K.AGLFNEEIYPLQVK.W                                                                                                                   |
| <a href="#">6994</a>  | 858.9536        | 1715.8927        | 1717.8846        | -1.9919        | 2        | 4         | 53             | 9         | K.SGEEKTITVKADDGIR.D                                                                                                                 |
| <a href="#">6999</a>  | <b>859.2356</b> | <b>1716.4567</b> | <b>1717.8887</b> | <b>-1.4319</b> | <b>2</b> | <b>1</b>  | <b>1.2e+02</b> | <b>10</b> | <b>K.WTDPKSGEEKTITVK.A</b>                                                                                                           |
| <a href="#">7744</a>  | <b>894.7326</b> | <b>1787.4507</b> | <b>1786.9247</b> | <b>0.5260</b>  | <b>0</b> | <b>47</b> | <b>0.0033</b>  | <b>1</b>  | <b>R.QCSSGLQAIVDIANAIK.S <a href="#">7742</a></b>                                                                                    |
| <a href="#">8172</a>  | 916.5801        | 1831.1457        | 1831.0091        | 0.1366         | 1        | 3         | 79             | 4         | K.DTAAADILAGIFKGVIEK.S <a href="#">8158</a> <a href="#">8159</a>                                                                     |
| <a href="#">9414</a>  | <b>658.6942</b> | <b>1973.0607</b> | <b>1974.9979</b> | <b>-1.9372</b> | <b>2</b> | <b>2</b>  | <b>96</b>      | <b>9</b>  | <b>K.VPMGVLSENMAKDRGISR.A</b>                                                                                                        |
| <a href="#">10712</a> | 710.5982        | 2128.7727        | 2129.9731        | -1.2003        | 0        | 2         | 75             | 2         | K.IGVTSMCVGTGMGMAAVVWR.E                                                                                                             |
| <a href="#">10844</a> | 716.1839        | 2145.5297        | 2146.0589        | -0.5292        | 1        | 3         | 59             | 3         | - .MSSAQQLTQVASHFTPGGK.K <a href="#">10827</a> <a href="#">10833</a> <a href="#">10839</a> <a href="#">10856</a> <a href="#">108</a> |
| <a href="#">11458</a> | 1115.4701       | 2228.9257        | 2226.0782        | 2.8475         | 1        | 1         | 1e+02          | 2         | K.KIGVTSMCVGTGMGMAAVVWR.E                                                                                                            |
| <a href="#">11663</a> | <b>754.7275</b> | <b>2261.1607</b> | <b>2259.0157</b> | <b>2.1451</b>  | <b>1</b> | <b>0</b>  | <b>1.2e+02</b> | <b>6</b>  | <b>K.IGVTSMCVGTGMGMAAVVRE.-</b>                                                                                                      |
| <a href="#">12378</a> | 790.7629        | 2369.2667        | 2371.1157        | -1.8490        | 2        | 5         | 35             | 2         | K.KIGVTSMCVGTGMGMAAVVRE.-                                                                                                            |
| <a href="#">13860</a> | 858.6879        | 2573.0417        | 2570.2478        | 2.7940         | 2        | 1         | 92             | 6         | R.TDKKIGVTSMCVGTGMGMAAVVWR.E                                                                                                         |

373. [gi|220694197|gb|EED50541.1|](#) Mass: 20389 Score: 53 Queries matched: 2 emPAI: 0.16

cytochrome c subunit Vb, putative [Aspergillus flavus NRRL3357]

| Query                | Observed        | Mr(expt)         | Mr(calc)         | Delta         | Miss     | Score     | Expect        | Rank     | Peptide                                          |
|----------------------|-----------------|------------------|------------------|---------------|----------|-----------|---------------|----------|--------------------------------------------------|
| <a href="#">8485</a> | <b>622.7622</b> | <b>1865.2647</b> | <b>1863.8971</b> | <b>1.3676</b> | <b>0</b> | <b>47</b> | <b>0.0028</b> | <b>1</b> | <b>K.MQGIDIFDMRPLDASR.K <a href="#">8491</a></b> |

374. [gi|220694193|gb|EED50537.1|](#) Mass: 13528 Score: 53 Queries matched: 4 emPAI: 0.57

ribosomal protein L34 protein, putative [Aspergillus flavus NRRL3357]

| Query | Observed | Mr(expt) | Mr(calc) | Delta | Miss | Score | Expect | Rank | Peptide |
|-------|----------|----------|----------|-------|------|-------|--------|------|---------|
|-------|----------|----------|----------|-------|------|-------|--------|------|---------|

|                      |          |           |           |         |   |    |       |   |                                  |
|----------------------|----------|-----------|-----------|---------|---|----|-------|---|----------------------------------|
| <a href="#">777</a>  | 489.5991 | 977.1837  | 976.5229  | 0.6608  | 0 | 41 | 0.015 | 1 | R.AFLIEEQK.I <a href="#">776</a> |
| <a href="#">1230</a> | 538.3631 | 1074.7117 | 1074.6662 | 0.0455  | 0 | 32 | 0.12  | 1 | K.LPGVPALRPR.E                   |
| <a href="#">1394</a> | 554.2311 | 1106.4477 | 1106.5720 | -0.1243 | 0 | 11 | 13    | 5 | R.EYSQISRPK.K                    |

375. [gi|220691333|gb|EED47681.1|](#) Mass: 145847 Score: 53 Queries matched: 20 emPAI: 0.05

phospholipase D (PLD), putative [Aspergillus flavus NRRL3357]

| Query                 | Observed  | Mr(expt)  | Mr(calc)  | Delta   | Miss | Score | Expect | Rank | Peptide                                                                                               |
|-----------------------|-----------|-----------|-----------|---------|------|-------|--------|------|-------------------------------------------------------------------------------------------------------|
| <a href="#">263</a>   | 816.5720  | 815.5647  | 815.5116  | 0.0531  | 1    | 18    | 3.5    | 1    | K.ELLSKVK.G <a href="#">261</a>                                                                       |
| <a href="#">1211</a>  | 536.5761  | 1071.1377 | 1070.5833 | 0.5545  | 1    | 4     | 72     | 1    | R.QVPGAKTASGR.W                                                                                       |
| <a href="#">1966</a>  | 607.2381  | 1212.4617 | 1211.6047 | 0.8570  | 0    | 12    | 8.9    | 7    | R.LSSFHPSQPR.G <a href="#">1964</a>                                                                   |
| <a href="#">3674</a>  | 705.8286  | 1409.6427 | 1409.7627 | -0.1199 | 0    | 9     | 20     | 1    | R.INVSGPLVQAEQR.S                                                                                     |
| <a href="#">4227</a>  | 738.2371  | 1474.4597 | 1473.6567 | 0.8030  | 0    | 12    | 11     | 2    | R.IAFMGGLDMCFGR.W <a href="#">4214</a> <a href="#">4217</a> <a href="#">4222</a> <a href="#">4231</a> |
| <a href="#">4514</a>  | 503.4985  | 1507.4737 | 1505.6465 | 1.8272  | 0    | (2)   | 1e+02  | 9    | R.IAFMGGLDMCFGR.W                                                                                     |
| <a href="#">4776</a>  | 513.1795  | 1536.5167 | 1536.7321 | -0.2154 | 1    | 8     | 22     | 1    | R.FGSFAPDRQNDVK.W                                                                                     |
| <a href="#">5349</a>  | 530.7885  | 1589.3437 | 1587.8515 | 1.4922  | 2    | 3     | 71     | 9    | R.LDRMLQSAAQGVK.V <a href="#">5314</a>                                                                |
| <a href="#">9121</a>  | 646.1249  | 1935.3527 | 1934.0010 | 1.3517  | 0    | 37    | 0.026  | 1    | R.LVADPLADTLHNLWNSR.A <a href="#">9136</a>                                                            |
| <a href="#">9978</a>  | 1019.4761 | 2036.9377 | 2034.0417 | 2.8960  | 0    | 36    | 0.032  | 1    | K.GTLVEMPLMFLIEEDVAK.S <a href="#">9967</a>                                                           |
| <a href="#">12010</a> | 770.7095  | 2309.1067 | 2308.1383 | 0.9685  | 1    | 2     | 87     | 4    | R.MGWSDISVSLHGHVVEDLRR.H                                                                              |

376. [gi|220693980|gb|EED50325.1|](#) Mass: 23266 Score: 53 Queries matched: 7 emPAI: 0.31

adenine phosphoribosyltransferase 1 [Aspergillus flavus NRRL3357]

| Query                 | Observed  | Mr(expt)  | Mr(calc)  | Delta  | Miss | Score | Expect  | Rank | Peptide                                                            |
|-----------------------|-----------|-----------|-----------|--------|------|-------|---------|------|--------------------------------------------------------------------|
| <a href="#">642</a>   | 473.5626  | 945.1107  | 944.5444  | 0.5664 | 0    | 37    | 0.038   | 1    | R.LGASFVPVR.K                                                      |
| <a href="#">1635</a>  | 572.6161  | 1143.2177 | 1142.6812 | 0.5366 | 0    | 44    | 0.007   | 1    | R.GFLIGPSLALR.L                                                    |
| <a href="#">10634</a> | 707.1485  | 2118.4237 | 2116.0988 | 2.3249 | 0    | 0     | 1.3e+02 | 2    | K.MGGELMSFLFILELEFLK.G                                             |
| <a href="#">11757</a> | 1140.1081 | 2278.2017 | 2276.1836 | 2.0181 | 1    | 3     | 60      | 2    | K.KMGELMSFLFILELEFLK.G <a href="#">11760</a> <a href="#">11762</a> |
| <a href="#">16280</a> | 1136.9722 | 3407.8947 | 3406.7965 | 1.0982 | 0    | 3     | 41      | 2    | R.QFPDFPSPGILFEDILPIFANPTLHEALLR.S                                 |

377. [gi|220692310|gb|EED48657.1|](#) Mass: 28516 Score: 53 Queries matched: 10 emPAI: 0.12

proteasome component Pre9, putative [Aspergillus flavus NRRL3357]

| Query                 | Observed | Mr(expt)  | Mr(calc)  | Delta   | Miss | Score | Expect  | Rank | Peptide                                                                 |
|-----------------------|----------|-----------|-----------|---------|------|-------|---------|------|-------------------------------------------------------------------------|
| <a href="#">2860</a>  | 662.5846 | 1323.1547 | 1321.6734 | 1.4814  | 1    | 4     | 56      | 1    | K.EACAMAVKVLISK.T                                                       |
| <a href="#">4689</a>  | 509.8109 | 1526.4107 | 1527.7318 | -1.3210 | 1    | 5     | 43      | 4    | R.YDSRTTIFSPGR.L                                                        |
| <a href="#">6458</a>  | 838.8021 | 1675.5897 | 1675.8992 | -0.3095 | 2    | 4     | 55      | 3    | K.KVTSKLLLEQDTSAEK.L                                                    |
| <a href="#">9405</a>  | 658.1592 | 1971.4557 | 1968.9682 | 2.4875  | 2    | (0)   | 1.3e+02 | 8    | K.EACAMAVKVLSTMDSTK.L                                                   |
| <a href="#">9506</a>  | 662.5845 | 1984.7317 | 1984.9632 | -0.2314 | 2    | 2     | 91      | 6    | K.EACAMAVKVLSTMDSTK.L                                                   |
| <a href="#">9633</a>  | 667.4069 | 1999.1987 | 2000.9581 | -1.7593 | 2    | (1)   | 1.1e+02 | 3    | K.EACAMAVKVLSTMDSTK.L                                                   |
| <a href="#">10434</a> | 697.3055 | 2088.8947 | 2087.0456 | 1.8491  | 2    | 1     | 1.1e+02 | 8    | K.TMDSTKLSSEKIEFATVVK.T                                                 |
| <a href="#">12843</a> | 811.8292 | 2432.4657 | 2430.3158 | 2.1499  | 0    | 53    | 0.00061 | 1    | R.LYQVEYALEAISHAGTALGILAK.D <a href="#">12829</a> <a href="#">12837</a> |

378. [gi|220701423|gb|EED57761.1|](#) Mass: 107781 Score: 53 Queries matched: 21 emPAI: 0.03

Hsp70 family chaperone Lhs1/Orp150, putative [Aspergillus flavus NRRL3357]

| Query                 | Observed         | Mr(expt)         | Mr(calc)         | Delta          | Miss     | Score     | Expect         | Rank     | Peptide                                        |
|-----------------------|------------------|------------------|------------------|----------------|----------|-----------|----------------|----------|------------------------------------------------|
| <a href="#">62</a>    | 685.4680         | 684.4607         | 684.3806         | 0.0801         | 0        | 8         | 23             | 5        | K.EQAPLK.E <a href="#">63</a>                  |
| <a href="#">234</a>   | 401.0606         | 800.1067         | 801.4708         | -1.3641        | 1        | 19        | 2.6            | 4        | K.TELGRVK.A                                    |
| <a href="#">1556</a>  | 566.6856         | 1131.3567        | 1131.6400        | -0.2833        | 1        | 11        | 15             | 3        | K.GAALSPSFRVK.D                                |
| <a href="#">2027</a>  | 613.0426         | 1224.0707        | 1223.6299        | 0.4409         | 0        | 9         | 19             | 4        | R.FYGGDALALAAAR.Y                              |
| <a href="#">2692</a>  | 652.2681         | 1302.5217        | 1302.6820        | -0.1603        | 0        | 11        | 15             | 2        | K.LFTPTSQVGPEK.Q                               |
| <a href="#">3080</a>  | 674.6756         | 1347.3367        | 1347.6969        | -0.3601        | 2        | 9         | 22             | 4        | K.TMARLWKDAEK.V <a href="#">3104</a>           |
| <a href="#">3281</a>  | <b>683.8791</b>  | <b>1365.7437</b> | <b>1364.6718</b> | <b>1.0719</b>  | <b>2</b> | <b>0</b>  | <b>1.4e+02</b> | <b>6</b> | <b>K.MGAAAKSGKDQSK.K</b>                       |
| <a href="#">3676</a>  | 706.1306         | 1410.2467        | 1410.6449        | -0.3982        | 0        | 2         | 95             | 5        | K.ESFGCSPANITTK.F <a href="#">3670</a>         |
| <a href="#">3746</a>  | 710.7916         | 1419.5687        | 1418.7630        | 0.8057         | 2        | 3         | 76             | 6        | R.VKARLAAFDASDR.D                              |
| <a href="#">5648</a>  | 539.1325         | 1614.3757        | 1615.8967        | -1.5210        | 2        | 5         | 49             | 8        | K.NAKTVLDLMEKQVK.Q                             |
| <a href="#">6251</a>  | 554.7192         | 1661.1357        | 1660.9109        | 0.2248         | 0        | 3         | 73             | 5        | K.DIFLVEELLAMQLK.Q                             |
| <a href="#">6383</a>  | <b>836.4151</b>  | <b>1670.8157</b> | <b>1669.8279</b> | <b>0.9878</b>  | <b>2</b> | <b>3</b>  | <b>79</b>      | <b>1</b> | <b>R.TMNRIYEKMGAAAK.S</b>                      |
| <a href="#">10513</a> | <b>1050.7201</b> | <b>2099.4257</b> | <b>2100.1943</b> | <b>-0.7686</b> | <b>2</b> | <b>2</b>  | <b>80</b>      | <b>1</b> | <b>R.FTSSPLGIPALSKTELGRVK.A</b>                |
| <a href="#">11063</a> | 726.0342         | 2175.0807        | 2175.3354        | -0.2547        | 2        | 21        | 1              | 2        | K.AVLVKPGIPLEIVLTKDSKR.K <a href="#">11074</a> |
| <a href="#">13585</a> | 843.9092         | 2528.7057        | 2530.2949        | -1.5892        | 1        | 1         | 86             | 2        | K.TLGGDSLNDLVVGDMIANLVQDKK.L                   |
| <a href="#">14850</a> | <b>924.2839</b>  | <b>2769.8297</b> | <b>2771.4739</b> | <b>-1.6442</b> | <b>2</b> | <b>2</b>  | <b>76</b>      | <b>4</b> | <b>K.TLGGDSLNDLVVGDMIANLVQDKK.L.D</b>          |
| <a href="#">15540</a> | <b>1014.6622</b> | <b>3040.9647</b> | <b>3038.6513</b> | <b>2.3135</b>  | <b>0</b> | <b>53</b> | <b>0.00056</b> | <b>1</b> | <b>R.VGQPLEQALAAAGLQLNDIDSIVLHGGAIR.T</b>      |

379. [gi|220696618|gb|EED52960.1|](#) Mass: 19331 Score: 52 Queries matched: 4 emPAI: 0.17

glutathione S-transferase, putative [Aspergillus flavus NRRL3357]

| Query                 | Observed        | Mr(expt)         | Mr(calc)         | Delta         | Miss     | Score     | Expect        | Rank     | Peptide                                                 |
|-----------------------|-----------------|------------------|------------------|---------------|----------|-----------|---------------|----------|---------------------------------------------------------|
| <a href="#">5165</a>  | 525.3512        | 1573.0317        | 1570.8177        | 2.2140        | 0        | 11        | 13            | 3        | K.NPALFMLLDPTAPR.E                                      |
| <a href="#">7433</a>  | 882.5811        | 1763.1477        | 1761.9566        | 1.1911        | 0        | 2         | 93            | 3        | K.YPQLATALGAVWFVAR.S                                    |
| <a href="#">12509</a> | <b>796.0645</b> | <b>2385.1717</b> | <b>2383.2899</b> | <b>1.8818</b> | <b>0</b> | <b>44</b> | <b>0.0053</b> | <b>1</b> | <b>R.AHANFLENAPQTILYTLVAGLK.Y <a href="#">12514</a></b> |

380. [gi|220691712|gb|EED48060.1|](#) Mass: 47020 Score: 52 Queries matched: 9 emPAI: 0.15

homocysteine synthase CysD [Aspergillus flavus NRRL3357]

| Query                 | Observed        | Mr(expt)         | Mr(calc)         | Delta          | Miss     | Score     | Expect       | Rank     | Peptide                                         |
|-----------------------|-----------------|------------------|------------------|----------------|----------|-----------|--------------|----------|-------------------------------------------------|
| <a href="#">2065</a>  | 615.7411        | 1229.4677        | 1229.6615        | -0.1938        | 0        | 16        | 4            | 2        | K.LISNLANVGDGSK.T                               |
| <a href="#">2584</a>  | 646.6121        | 1291.2097        | 1291.6482        | -0.4385        | 0        | (3)       | 85           | 10       | R.IMNPTVDVFEEK.R                                |
| <a href="#">2712</a>  | <b>654.1136</b> | <b>1306.2127</b> | <b>1307.6431</b> | <b>-1.4304</b> | <b>0</b> | <b>3</b>  | <b>81</b>    | <b>2</b> | <b>R.IMNPTVDVFEEK.R</b>                         |
| <a href="#">7148</a>  | <b>579.5505</b> | <b>1735.6297</b> | <b>1733.8413</b> | <b>1.7884</b>  | <b>0</b> | <b>39</b> | <b>0.016</b> | <b>1</b> | <b>R.FPQFVEPSEGYHGLK.F <a href="#">7147</a></b> |
| <a href="#">7800</a>  | 897.3716        | 1792.7287        | 1791.9492        | 0.7795         | 1        | 7         | 31           | 4        | R.AERHASNALALANWLR.T                            |
| <a href="#">8306</a>  | <b>616.8312</b> | <b>1847.4717</b> | <b>1844.8905</b> | <b>2.5813</b>  | <b>0</b> | <b>32</b> | <b>0.088</b> | <b>1</b> | <b>K.FVQGDKPEDIGAAIDDR.T</b>                    |
| <a href="#">12716</a> | 806.4842        | 2416.4307        | 2414.2052        | 2.2255         | 2        | 1         | 98           | 3        | K.EFGNIYSRIMNPTVDVFEEKR.I                       |

[15023](#) 940.0735 2817.1987 2816.4571 0.7416 2 1 94 7 R.LFGLKEFGNIYSRIMNPTVDVFEK.R

381. [gi|220693972|gb|EED50317.1|](#) Mass: 46080 Score: 52 Queries matched: 10 emPAI: 0.15

mRNA binding post-transcriptional regulator (Csxl), putative [Aspergillus flavus NRRL3357]

| Query                 | Observed        | Mr(expt)         | Mr(calc)         | Delta          | Miss | Score     | Expect         | Rank     | Peptide                                                            |
|-----------------------|-----------------|------------------|------------------|----------------|------|-----------|----------------|----------|--------------------------------------------------------------------|
| <a href="#">1895</a>  | <b>600.2921</b> | <b>1198.5697</b> | <b>1196.5761</b> | <b>1.9936</b>  | 0    | <b>28</b> | <b>0.23</b>    | <b>1</b> | <b>K.GCGFVQFVQR.H</b>                                              |
| <a href="#">2024</a>  | 612.6681        | 1223.3217        | 1222.5686        | 0.7531         | 0    | 14        | 5.7            | 3        | K.IMTDPISGMSR.G <a href="#">2023</a>                               |
| <a href="#">4645</a>  | <b>762.3271</b> | <b>1522.6397</b> | <b>1521.7504</b> | <b>0.8893</b>  | 0    | <b>52</b> | <b>0.00083</b> | <b>1</b> | <b>R.SFFQGFGEITYVK.I</b> <a href="#">4637</a>                      |
| <a href="#">4676</a>  | 763.4736        | 1524.9327        | 1524.7276        | 0.2051         | 1    | 2         | 1e+02          | 8        | K.SAKIMTDPISGMSR.G                                                 |
| <a href="#">5685</a>  | <b>809.4706</b> | <b>1616.9267</b> | <b>1617.8627</b> | <b>-0.9360</b> | 1    | <b>1</b>  | <b>1.3e+02</b> | <b>2</b> | <b>R.LFKLNWATGGGLADR.S</b>                                         |
| <a href="#">10847</a> | 716.2075        | 2145.6007        | 2144.0064        | 1.5943         | 2    | 5         | 43             | 7        | R.FPSCSAKIMTDPISGMSR.G <a href="#">10811</a> <a href="#">10815</a> |

382. [gi|220698373|gb|EED54713.1|](#) Mass: 92024 Score: 51 Queries matched: 22 emPAI: 0.07

phosphoketolase, putative [Aspergillus flavus NRRL3357]

| Query                 | Observed         | Mr(expt)         | Mr(calc)         | Delta          | Miss | Score     | Expect         | Rank     | Peptide                                                |
|-----------------------|------------------|------------------|------------------|----------------|------|-----------|----------------|----------|--------------------------------------------------------|
| <a href="#">128</a>   | 738.4240         | 737.4167         | 735.4167         | 2.0001         | 0    | 18        | 1.8            | 2        | K.LAEIYK.A <a href="#">129</a>                         |
| <a href="#">1473</a>  | 561.0271         | 1120.0397        | 1119.6651        | 0.3746         | 2    | 4         | 64             | 9        | K.LAEIYKAGKK.V                                         |
| <a href="#">1622</a>  | <b>1141.9260</b> | <b>1140.9187</b> | <b>1140.6404</b> | <b>0.2784</b>  | 0    | <b>1</b>  | <b>1.4e+02</b> | <b>4</b> | <b>R.RPLQLPDR.D</b>                                    |
| <a href="#">2837</a>  | <b>660.7221</b>  | <b>1319.4297</b> | <b>1318.7721</b> | <b>0.6576</b>  | 2    | <b>1</b>  | <b>1.3e+02</b> | <b>3</b> | <b>K.EPLKVEHLKAR.L</b>                                 |
| <a href="#">2942</a>  | 666.5516         | 1331.0887        | 1330.6881        | 0.4006         | 0    | 5         | 53             | 9        | K.GNIDTPFELAVR.N <a href="#">2940</a>                  |
| <a href="#">3011</a>  | <b>670.6896</b>  | <b>1339.3647</b> | <b>1338.6602</b> | <b>0.7045</b>  | 1    | <b>0</b>  | <b>1.4e+02</b> | <b>1</b> | <b>R.DVVKENMTTFR.V</b>                                 |
| <a href="#">5967</a>  | 547.7352         | 1640.1837        | 1639.7230        | 0.4607         | 0    | 3         | 75             | 4        | R.ASMYLCLGMLYMR.D                                      |
| <a href="#">6424</a>  | 837.7606         | 1673.5067        | 1673.7944        | -0.2876        | 1    | 2         | 84             | 3        | R.LINEKDHPHGMPDR.Q                                     |
| <a href="#">8620</a>  | <b>628.3579</b>  | <b>1882.0517</b> | <b>1880.0243</b> | <b>2.0274</b>  | 2    | <b>1</b>  | <b>98</b>      | <b>5</b> | <b>R.WPMIVLRSFKGWSAPR.E</b>                            |
| <a href="#">8634</a>  | <b>629.2519</b>  | <b>1884.7337</b> | <b>1883.0265</b> | <b>1.7072</b>  | 0    | <b>16</b> | <b>3.1</b>     | <b>1</b> | <b>R.SHQIPITDVLTPAHLK.L</b>                            |
| <a href="#">8650</a>  | <b>943.8646</b>  | <b>1885.7147</b> | <b>1886.7952</b> | <b>-1.0805</b> | 0    | <b>5</b>  | <b>42</b>      | <b>1</b> | <b>- .MAPSSESDDNISAYGATR.S</b>                         |
| <a href="#">12083</a> | <b>773.4325</b>  | <b>2317.2757</b> | <b>2316.0539</b> | <b>1.2218</b>  | 1    | <b>2</b>  | <b>80</b>      | <b>2</b> | <b>- .MAPSSESDDNISAYGATRSTIK.G</b>                     |
| <a href="#">12703</a> | 805.7775         | 2414.3107        | 2415.1410        | -0.8303        | 2    | 2         | 77             | 7        | R.DYALKDIDPGVSVRGSMTNMSK.F <a href="#">12698</a>       |
| <a href="#">12794</a> | <b>809.5335</b>  | <b>2425.5787</b> | <b>2423.2856</b> | <b>2.2932</b>  | 1    | <b>3</b>  | <b>59</b>      | <b>4</b> | <b>R.MSANPVGNGGILRRPLQLPDR.D</b> <a href="#">12788</a> |
| <a href="#">13837</a> | <b>857.1519</b>  | <b>2568.4337</b> | <b>2567.1503</b> | <b>1.2834</b>  | 2    | <b>4</b>  | <b>45</b>      | <b>3</b> | <b>R.KMDAYFRASMYLCLGMLYMR.D</b>                        |
| <a href="#">14751</a> | <b>913.9399</b>  | <b>2738.7977</b> | <b>2737.3105</b> | <b>1.4873</b>  | 0    | <b>52</b> | <b>0.0007</b>  | <b>1</b> | <b>R.HGILNSYEPFIHVIDSMVNQHCK.W</b>                     |
| <a href="#">15181</a> | <b>956.1332</b>  | <b>2865.3777</b> | <b>2865.5130</b> | <b>-0.1353</b> | 2    | <b>4</b>  | <b>40</b>      | <b>1</b> | <b>K.LVEELKALAPSGNSRMSANPVGNGGILR.R</b>                |
| <a href="#">15816</a> | 1053.4612        | 3157.3617        | 3157.6290        | -0.2673        | 1    | 1         | 74             | 2        | R.QWKAVFTDDKPIIFNFHSYPWLIHR.L                          |

383. [gi|220698336|gb|EED54676.1|](#) Mass: 17557 Score: 51 Queries matched: 4 emPAI: 0.19

peroxiredoxin, putative [Aspergillus flavus NRRL3357]

| Query                 | Observed         | Mr(expt)         | Mr(calc)         | Delta         | Miss | Score     | Expect        | Rank     | Peptide                                                       |
|-----------------------|------------------|------------------|------------------|---------------|------|-----------|---------------|----------|---------------------------------------------------------------|
| <a href="#">12856</a> | <b>812.4892</b>  | <b>2434.4457</b> | <b>2433.2363</b> | <b>1.2095</b> | 1    | <b>4</b>  | <b>53</b>     | <b>1</b> | <b>K.EKGVQVAVVASNDPFVMSAWGK.A</b> <a href="#">12849</a>       |
| <a href="#">16032</a> | <b>1095.3399</b> | <b>3282.9977</b> | <b>3281.7271</b> | <b>1.2706</b> | 0    | <b>46</b> | <b>0.0027</b> | <b>1</b> | <b>K.VVLFVPGAFPTPCSVNHVPGYIQNLPLK.E</b> <a href="#">16031</a> |



384. [gi|220701739|gb|EED58077.1|](#) Mass: 18594 Score: 51 Queries matched: 12 emPAI: 0.65

40S ribosomal protein S11 [Aspergillus flavus NRRL3357]

| Query                | Observed | Mr(expt)  | Mr(calc)  | Delta  | Miss | Score | Expect | Rank | Peptide                                                |
|----------------------|----------|-----------|-----------|--------|------|-------|--------|------|--------------------------------------------------------|
| <a href="#">2</a>    | 601.4700 | 600.4627  | 600.3959  | 0.0668 | 0    | 13    | 9.9    | 2    | R.TIVIR.R <a href="#">1</a>                            |
| <a href="#">21</a>   | 648.5450 | 647.5377  | 647.3755  | 0.1622 | 0    | 13    | 11     | 6    | R.FNVL.R.V                                             |
| <a href="#">1086</a> | 524.8136 | 1047.6127 | 1047.5389 | 0.0738 | 0    | 32    | 0.13   | 1    | R.EYLHYVPK.Y <a href="#">1084</a> <a href="#">1097</a> |
| <a href="#">1742</a> | 585.0601 | 1168.1057 | 1166.5576 | 1.5481 | 0    | 21    | 1.2    | 1    | K.CPFTGMVSIR.G                                         |
| <a href="#">1816</a> | 592.6776 | 1183.3407 | 1181.6305 | 1.7102 | 0    | 37    | 0.03   | 1    | K.NLAAHVSPAFR.V <a href="#">1818</a>                   |
| <a href="#">2126</a> | 620.6356 | 1239.2567 | 1237.6554 | 1.6013 | 1    | 36    | 0.036  | 1    | K.TAIEGTYIDKK.C                                        |
| <a href="#">5000</a> | 779.3946 | 1556.7747 | 1554.9028 | 1.8719 | 2    | 3     | 77     | 4    | R.VVSTKMVRTIVIR.R                                      |
| <a href="#">9134</a> | 646.4979 | 1936.4717 | 1936.0135 | 0.4582 | 2    | 2     | 85     | 8    | K.CPFTGMVSIRGRILTGR.V                                  |

385. [gi|220691683|gb|EED48031.1|](#) Mass: 55679 Score: 51 Queries matched: 15 emPAI: 0.06

vacuolar aspartyl aminopeptidase Lap4, putative [Aspergillus flavus NRRL3357]

| Query                 | Observed  | Mr(expt)  | Mr(calc)  | Delta   | Miss | Score | Expect | Rank | Peptide                                  |
|-----------------------|-----------|-----------|-----------|---------|------|-------|--------|------|------------------------------------------|
| <a href="#">86</a>    | 704.5610  | 703.5537  | 701.4072  | 2.1465  | 0    | 20    | 2.5    | 1    | R.SVLDLR.D                               |
| <a href="#">1301</a>  | 545.0776  | 1088.1407 | 1086.6509 | 1.4898  | 2    | 7     | 40     | 9    | M.TKRSVLDLR.D <a href="#">1302</a>       |
| <a href="#">1736</a>  | 584.5091  | 1167.0037 | 1165.5397 | 1.4640  | 0    | 7     | 29     | 4    | R.SGGTIGPMTSSR.I                         |
| <a href="#">1944</a>  | 606.2431  | 1210.4717 | 1209.7234 | 0.7484  | 1    | 8     | 21     | 10   | K.LVKLDWPIAR.I                           |
| <a href="#">2000</a>  | 610.1736  | 1218.3327 | 1217.6914 | 0.6413  | 2    | 9     | 24     | 8    | - .MTKRSVLDLR.D                          |
| <a href="#">5905</a>  | 818.6521  | 1635.2897 | 1635.8766 | -0.5869 | 0    | (3)   | 73     | 4    | R.AIDVGIPQLSMHSIR.A                      |
| <a href="#">6148</a>  | 827.3156  | 1652.6167 | 1651.8716 | 0.7452  | 0    | 3     | 66     | 5    | R.AIDVGIPQLSMHSIR.A <a href="#">6160</a> |
| <a href="#">6940</a>  | 856.5921  | 1711.1697 | 1710.7957 | 0.3740  | 0    | 51    | 0.0012 | 1    | K.MVGMFDDEEIGSLLR.Q                      |
| <a href="#">7411</a>  | 587.9055  | 1760.6947 | 1757.9272 | 2.7675  | 1    | 3     | 67     | 4    | R.DLSIGGRVLVQDSNTGK.V                    |
| <a href="#">10485</a> | 699.4549  | 2095.3427 | 2093.1238 | 2.2190  | 1    | 2     | 79     | 6    | R.IGMRAIDVGIPQLSMHSIR.A                  |
| <a href="#">14720</a> | 910.5139  | 2728.5197 | 2729.4442 | -0.9245 | 1    | 1     | 91     | 1    | K.LDWPIARIPTLAPHFGAPSPQPFNK.E            |
| <a href="#">14928</a> | 929.3735  | 2785.0987 | 2783.5004 | 1.5984  | 2    | 0     | 1e+02  | 8    | R.DYKSGNGMAIVAGHIDALTAKLKPVSK.L          |
| <a href="#">16140</a> | 1109.0042 | 3323.9907 | 3321.5428 | 2.4479  | 2    | 1     | 69     | 9    | K.MVGMFDDEEIGSLLRQARSNFMSSVIER.I         |

386. [gi|3845477|dbj|BAA34135.1|](#) Mass: 15942 Score: 51 Queries matched: 1 emPAI: 0.21

cytochrome b [Aspergillus flavus]

| Query                | Observed | Mr(expt)  | Mr(calc)  | Delta  | Miss | Score | Expect | Rank | Peptide        |
|----------------------|----------|-----------|-----------|--------|------|-------|--------|------|----------------|
| <a href="#">2146</a> | 622.3326 | 1242.6507 | 1241.6849 | 0.9659 | 0    | 51    | 0.0014 | 1    | R.LPFAPYFIFK.D |

Proteins matching the same set of peptides:

[gi|3845479|dbj|BAA34136.1|](#) Mass: 15942 Score: 51 Queries matched: 1

cytochrome b [Aspergillus flavus]

|                                                                                                                            |                    |                  |                           |
|----------------------------------------------------------------------------------------------------------------------------|--------------------|------------------|---------------------------|
| <a href="#">gi 3845481 dbj BAA34137.1 </a>                                                                                 | <b>Mass:</b> 15942 | <b>Score:</b> 51 | <b>Queries matched:</b> 1 |
| cytochrome b [Aspergillus flavus]                                                                                          |                    |                  |                           |
| <a href="#">gi 3845483 dbj BAA34138.1 </a>                                                                                 | <b>Mass:</b> 15942 | <b>Score:</b> 51 | <b>Queries matched:</b> 1 |
| cytochrome b [Aspergillus flavus]                                                                                          |                    |                  |                           |
| <a href="#">gi 3845485 dbj BAA34139.1 </a>                                                                                 | <b>Mass:</b> 15942 | <b>Score:</b> 51 | <b>Queries matched:</b> 1 |
| cytochrome b [Aspergillus flavus]                                                                                          |                    |                  |                           |
| <a href="#">gi 3845487 dbj BAA34140.1 </a>                                                                                 | <b>Mass:</b> 15942 | <b>Score:</b> 51 | <b>Queries matched:</b> 1 |
| cytochrome b [Aspergillus flavus]                                                                                          |                    |                  |                           |
| <a href="#">gi 3845529 dbj BAA34161.1 </a>                                                                                 | <b>Mass:</b> 15942 | <b>Score:</b> 51 | <b>Queries matched:</b> 1 |
| cytochrome b [Aspergillus flavus]                                                                                          |                    |                  |                           |
| <a href="#">gi 6009463 dbj BAA34141.2 </a>                                                                                 | <b>Mass:</b> 16396 | <b>Score:</b> 51 | <b>Queries matched:</b> 1 |
| cytochrome b [Aspergillus flavus]                                                                                          |                    |                  |                           |
| <a href="#">gi 6009465 dbj BAA34159.2 </a>                                                                                 | <b>Mass:</b> 16396 | <b>Score:</b> 51 | <b>Queries matched:</b> 1 |
| cytochrome b [Aspergillus flavus]                                                                                          |                    |                  |                           |
| <a href="#">gi 6009466 dbj BAA34160.2 </a>                                                                                 | <b>Mass:</b> 16396 | <b>Score:</b> 51 | <b>Queries matched:</b> 1 |
| cytochrome b [Aspergillus flavus]                                                                                          |                    |                  |                           |
| <a href="#">gi 6014790 sp P56629.1 CYB_ASPFL</a>                                                                           | <b>Mass:</b> 16298 | <b>Score:</b> 51 | <b>Queries matched:</b> 1 |
| RecName: Full=Cytochrome b; AltName: Full=Ubiquinol-cytochrome-c reductase complex cytochrome b subunit; AltName: Full=Cyt |                    |                  |                           |
| <a href="#">gi 19909791 dbj BAB87090.1 </a>                                                                                | <b>Mass:</b> 14988 | <b>Score:</b> 51 | <b>Queries matched:</b> 1 |
| cytochrome b [Aspergillus parasiticus]                                                                                     |                    |                  |                           |
| <a href="#">gi 19909793 dbj BAB87091.1 </a>                                                                                | <b>Mass:</b> 14988 | <b>Score:</b> 51 | <b>Queries matched:</b> 1 |
| cytochrome b [Aspergillus parasiticus]                                                                                     |                    |                  |                           |
| <a href="#">gi 19909795 dbj BAB87092.1 </a>                                                                                | <b>Mass:</b> 14988 | <b>Score:</b> 51 | <b>Queries matched:</b> 1 |
| cytochrome b [Aspergillus parasiticus]                                                                                     |                    |                  |                           |
| <a href="#">gi 19909801 dbj BAB87095.1 </a>                                                                                | <b>Mass:</b> 14988 | <b>Score:</b> 51 | <b>Queries matched:</b> 1 |
| cytochrome b [Aspergillus parasiticus]                                                                                     |                    |                  |                           |
| <a href="#">gi 19909803 dbj BAB87096.1 </a>                                                                                | <b>Mass:</b> 14988 | <b>Score:</b> 51 | <b>Queries matched:</b> 1 |
| cytochrome b [Aspergillus parasiticus]                                                                                     |                    |                  |                           |
| <a href="#">gi 19909805 dbj BAB87097.1 </a>                                                                                | <b>Mass:</b> 14988 | <b>Score:</b> 51 | <b>Queries matched:</b> 1 |
| cytochrome b [Aspergillus parasiticus]                                                                                     |                    |                  |                           |
| <a href="#">gi 19909807 dbj BAB87098.1 </a>                                                                                | <b>Mass:</b> 14988 | <b>Score:</b> 51 | <b>Queries matched:</b> 1 |
| cytochrome b [Aspergillus flavus]                                                                                          |                    |                  |                           |
| <a href="#">gi 19909809 dbj BAB87099.1 </a>                                                                                | <b>Mass:</b> 14988 | <b>Score:</b> 51 | <b>Queries matched:</b> 1 |
| cytochrome b [Aspergillus flavus]                                                                                          |                    |                  |                           |
| <a href="#">gi 19909821 dbj BAB87105.1 </a>                                                                                | <b>Mass:</b> 14988 | <b>Score:</b> 51 | <b>Queries matched:</b> 1 |
| cytochrome b [Aspergillus flavus]                                                                                          |                    |                  |                           |
| <a href="#">gi 19909823 dbj BAB87106.1 </a>                                                                                | <b>Mass:</b> 14988 | <b>Score:</b> 51 | <b>Queries matched:</b> 1 |
| cytochrome b [Aspergillus flavus var. columnaris]                                                                          |                    |                  |                           |
| <a href="#">gi 19909825 dbj BAB87107.1 </a>                                                                                | <b>Mass:</b> 14988 | <b>Score:</b> 51 | <b>Queries matched:</b> 1 |
| cytochrome b [Aspergillus flavus var. columnaris]                                                                          |                    |                  |                           |

|                                                   |                    |                  |                           |
|---------------------------------------------------|--------------------|------------------|---------------------------|
| <a href="#">gi 19909827 dbj BAB87108.1 </a>       | <b>Mass:</b> 14988 | <b>Score:</b> 51 | <b>Queries matched:</b> 1 |
| cytochrome b [Aspergillus flavus var. columnaris] |                    |                  |                           |
| <a href="#">gi 19909829 dbj BAB87109.1 </a>       | <b>Mass:</b> 14988 | <b>Score:</b> 51 | <b>Queries matched:</b> 1 |
| cytochrome b [Aspergillus flavus var. columnaris] |                    |                  |                           |
| <a href="#">gi 19909831 dbj BAB87110.1 </a>       | <b>Mass:</b> 14988 | <b>Score:</b> 51 | <b>Queries matched:</b> 1 |
| cytochrome b [Aspergillus flavus]                 |                    |                  |                           |
| <a href="#">gi 167735735 dbj BAG07148.1 </a>      | <b>Mass:</b> 14988 | <b>Score:</b> 51 | <b>Queries matched:</b> 1 |
| cytochrome b [Aspergillus parasiticus]            |                    |                  |                           |
| <a href="#">gi 167735737 dbj BAG07149.1 </a>      | <b>Mass:</b> 14988 | <b>Score:</b> 51 | <b>Queries matched:</b> 1 |
| cytochrome b [Aspergillus parasiticus]            |                    |                  |                           |
| <a href="#">gi 167735739 dbj BAG07150.1 </a>      | <b>Mass:</b> 14988 | <b>Score:</b> 51 | <b>Queries matched:</b> 1 |
| cytochrome b [Aspergillus parasiticus]            |                    |                  |                           |
| <a href="#">gi 167735741 dbj BAG07151.1 </a>      | <b>Mass:</b> 14988 | <b>Score:</b> 51 | <b>Queries matched:</b> 1 |
| cytochrome b [Aspergillus parasiticus]            |                    |                  |                           |
| <a href="#">gi 167735743 dbj BAG07152.1 </a>      | <b>Mass:</b> 14988 | <b>Score:</b> 51 | <b>Queries matched:</b> 1 |
| cytochrome b [Aspergillus parasiticus]            |                    |                  |                           |
| <a href="#">gi 167735745 dbj BAG07153.1 </a>      | <b>Mass:</b> 14988 | <b>Score:</b> 51 | <b>Queries matched:</b> 1 |
| cytochrome b [Aspergillus parasiticus]            |                    |                  |                           |
| <a href="#">gi 167735747 dbj BAG07154.1 </a>      | <b>Mass:</b> 14988 | <b>Score:</b> 51 | <b>Queries matched:</b> 1 |
| cytochrome b [Aspergillus parasiticus]            |                    |                  |                           |
| <a href="#">gi 167735749 dbj BAG07155.1 </a>      | <b>Mass:</b> 14988 | <b>Score:</b> 51 | <b>Queries matched:</b> 1 |
| cytochrome b [Aspergillus parasiticus]            |                    |                  |                           |
| <a href="#">gi 167735751 dbj BAG07156.1 </a>      | <b>Mass:</b> 14988 | <b>Score:</b> 51 | <b>Queries matched:</b> 1 |
| cytochrome b [Aspergillus parasiticus]            |                    |                  |                           |
| <a href="#">gi 167735753 dbj BAG07157.1 </a>      | <b>Mass:</b> 14988 | <b>Score:</b> 51 | <b>Queries matched:</b> 1 |
| cytochrome b [Aspergillus parasiticus]            |                    |                  |                           |
| <a href="#">gi 167735755 dbj BAG07158.1 </a>      | <b>Mass:</b> 14988 | <b>Score:</b> 51 | <b>Queries matched:</b> 1 |
| cytochrome b [Aspergillus parasiticus]            |                    |                  |                           |
| <a href="#">gi 167735757 dbj BAG07159.1 </a>      | <b>Mass:</b> 14988 | <b>Score:</b> 51 | <b>Queries matched:</b> 1 |
| cytochrome b [Aspergillus parasiticus]            |                    |                  |                           |
| <a href="#">gi 167735775 dbj BAG07168.1 </a>      | <b>Mass:</b> 14988 | <b>Score:</b> 51 | <b>Queries matched:</b> 1 |
| cytochrome b [Aspergillus flavus]                 |                    |                  |                           |
| <a href="#">gi 167735777 dbj BAG07169.1 </a>      | <b>Mass:</b> 14988 | <b>Score:</b> 51 | <b>Queries matched:</b> 1 |
| cytochrome b [Aspergillus flavus]                 |                    |                  |                           |
| <a href="#">gi 167735779 dbj BAG07170.1 </a>      | <b>Mass:</b> 14988 | <b>Score:</b> 51 | <b>Queries matched:</b> 1 |
| cytochrome b [Aspergillus flavus]                 |                    |                  |                           |
| <a href="#">gi 167735781 dbj BAG07171.1 </a>      | <b>Mass:</b> 14988 | <b>Score:</b> 51 | <b>Queries matched:</b> 1 |
| cytochrome b [Aspergillus flavus]                 |                    |                  |                           |
| <a href="#">gi 167735783 dbj BAG07172.1 </a>      | <b>Mass:</b> 14988 | <b>Score:</b> 51 | <b>Queries matched:</b> 1 |
| cytochrome b [Aspergillus flavus]                 |                    |                  |                           |

[gi|167735785|dbj|BAG07173.1|](#) **Mass:** 14988 **Score:** 51 **Queries matched:** 1  
cytochrome b [Aspergillus flavus]  
[gi|167735787|dbj|BAG07174.1|](#) **Mass:** 14988 **Score:** 51 **Queries matched:** 1  
cytochrome b [Aspergillus flavus]  
[gi|167735789|dbj|BAG07175.1|](#) **Mass:** 14988 **Score:** 51 **Queries matched:** 1  
cytochrome b [Aspergillus flavus]  
[gi|167735791|dbj|BAG07176.1|](#) **Mass:** 14988 **Score:** 51 **Queries matched:** 1  
cytochrome b [Aspergillus flavus]  
[gi|167735793|dbj|BAG07177.1|](#) **Mass:** 14988 **Score:** 51 **Queries matched:** 1  
cytochrome b [Aspergillus flavus]

387. [gi|220692549|gb|EED48895.1|](#) **Mass:** 42449 **Score:** 50 **Queries matched:** 5 **emPAI:** 0.08  
tyrosyl-tRNA synthetase [Aspergillus flavus NRRL3357]

| Query                 | Observed        | Mr(expt)         | Mr(calc)         | Delta          | Miss     | Score     | Expect        | Rank     | Peptide                                                        |
|-----------------------|-----------------|------------------|------------------|----------------|----------|-----------|---------------|----------|----------------------------------------------------------------|
| <a href="#">736</a>   | 485.4406        | 968.8667         | 968.4121         | 0.4547         | 0        | 5         | 49            | 10       | K.MSSSVEDSK.I                                                  |
| <a href="#">1044</a>  | <b>520.6721</b> | <b>1039.3297</b> | <b>1039.5662</b> | <b>-0.2365</b> | <b>0</b> | <b>50</b> | <b>0.0015</b> | <b>1</b> | <b>K.APLELVENR.A <a href="#">1040</a> <a href="#">1049</a></b> |
| <a href="#">12334</a> | 787.2489        | 2358.7247        | 2358.1413        | 0.5834         | 1        | 0         | 1.2e+02       | 5        | K.SPEYVMDVYRLSSLISEGDAK.K                                      |

388. [gi|220699128|gb|EED55467.1|](#) **Mass:** 18751 **Score:** 49 **Queries matched:** 2 **emPAI:** 0.18  
ubiquinol-cytochrome c reductase complex 17 kd protein [Aspergillus flavus NRRL3357]

| Query                 | Observed | Mr(expt)  | Mr(calc)  | Delta  | Miss | Score | Expect | Rank | Peptide                                         |
|-----------------------|----------|-----------|-----------|--------|------|-------|--------|------|-------------------------------------------------|
| <a href="#">13404</a> | 836.9332 | 2507.7777 | 2506.0352 | 1.7426 | 0    | 42    | 0.0076 | 1    | K.EDCVVEFFHLAHCASECAAPK.L <a href="#">13387</a> |

389. [gi|220701045|gb|EED57383.1|](#) **Mass:** 65678 **Score:** 49 **Queries matched:** 24 **emPAI:** 0.05  
TPR domain protein [Aspergillus flavus NRRL3357]

| Query                 | Observed        | Mr(expt)         | Mr(calc)         | Delta         | Miss     | Score     | Expect        | Rank     | Peptide                                                           |
|-----------------------|-----------------|------------------|------------------|---------------|----------|-----------|---------------|----------|-------------------------------------------------------------------|
| <a href="#">1320</a>  | 546.6386        | 1091.2627        | 1090.5805        | 0.6823        | 1        | 12        | 10            | 2        | K.LKTAMDAVAR.M <a href="#">1319</a> <a href="#">1323</a>          |
| <a href="#">1904</a>  | 601.4066        | 1200.7987        | 1199.6398        | 1.1590        | 0        | 12        | 9.7           | 2        | R.LDTSQAPEVIK.K                                                   |
| <a href="#">2438</a>  | 639.1011        | 1276.1877        | 1274.6176        | 1.5701        | 0        | 9         | 23            | 2        | R.MEASVPEEVLR.M                                                   |
| <a href="#">4937</a>  | <b>776.1906</b> | <b>1550.3667</b> | <b>1549.7480</b> | <b>0.6187</b> | <b>1</b> | <b>4</b>  | <b>62</b>     | <b>4</b> | <b>R.MEASVPEEVLRMK.S <a href="#">4942</a></b>                     |
| <a href="#">5587</a>  | 537.6095        | 1609.8067        | 1608.9060        | 0.9008        | 1        | 2         | 1.1e+02       | 8        | R.ADLGLDNTLIRPRR.H                                                |
| <a href="#">6213</a>  | 830.1561        | 1658.2977        | 1656.8869        | 1.4109        | 1        | 6         | 42            | 2        | R.LGKTEQAAMIEPTLR.L                                               |
| <a href="#">10147</a> | 1028.4556       | 2054.8967        | 2051.9631        | 2.9336        | 1        | 4         | 57            | 3        | R.MKSPPMADWLENFMTVR.V <a href="#">10112</a> <a href="#">10145</a> |
| <a href="#">10263</a> | 689.3492        | 2065.0257        | 2064.0575        | 0.9683        | 2        | 1         | 1e+02         | 2        | R.FDPQDLAVCLKRAFAASR.R                                            |
| <a href="#">10550</a> | 702.5459        | 2104.6157        | 2106.0085        | -1.3928       | 1        | 0         | 1.2e+02       | 8        | K.TAMDAVARMEASVPEEVLR.M                                           |
| <a href="#">10930</a> | 719.7572        | 2156.2497        | 2158.1494        | -1.8997       | 1        | 2         | 75            | 2        | K.AESVYRADLGLDNTLIRPR.R                                           |
| <a href="#">11491</a> | <b>745.6935</b> | <b>2234.0587</b> | <b>2232.1902</b> | <b>1.8685</b> | <b>0</b> | <b>49</b> | <b>0.0016</b> | <b>1</b> | <b>K.ELSVHALPWEQALADALTTLR.Y</b>                                  |
| <a href="#">12300</a> | 784.8455        | 2351.5147        | 2349.1490        | 2.3657        | 2        | 2         | 82            | 3        | K.TAMDAVARMEASVPEEVLRMK.S                                         |
| <a href="#">12652</a> | 803.3442        | 2407.0107        | 2406.2001        | 0.8106        | 1        | 5         | 40            | 2        | R.HAYAALMLEQQIEKAESVYR.A <a href="#">12648</a>                    |

[13066](#) **823.1302** **2466.3687** **2465.3563** **1.0124** **1** **6** **35** **1** **K.TEQAAMIEPTLRRLALAVADVPIK.A** [13050](#) [13062](#)  
[14879](#) **925.7732** **2774.2977** **2773.3689** **0.9289** **2** **2** **65** **1** **R.MKSPPMADWLENFMTVRVHVMVR.F** [14886](#)

390. [gi|220694187|gb|EED50531.1|](#) **Mass:** 23440 **Score:** 49 **Queries matched:** 8 **emPAI:** 0.14

secretory pathway protein Ssp120, putative [Aspergillus flavus NRRL3357]

| Query                 | Observed        | Mr(expt)         | Mr(calc)         | Delta          | Miss     | Score     | Expect        | Rank      | Peptide                                          |
|-----------------------|-----------------|------------------|------------------|----------------|----------|-----------|---------------|-----------|--------------------------------------------------|
| <a href="#">239</a>   | 803.7220        | 802.7147         | 801.4708         | 1.2439         | 1        | 7         | 41            | 7         | R.LISEGKR.L                                      |
| <a href="#">3062</a>  | <b>673.2041</b> | <b>1344.3937</b> | <b>1342.7278</b> | <b>1.6659</b>  | <b>1</b> | <b>4</b>  | <b>63</b>     | <b>9</b>  | <b>R.MQIVEKNIPQK.F</b>                           |
| <a href="#">4712</a>  | 765.7876        | 1529.5607        | 1530.8075        | -1.2468        | 1        | 2         | 94            | 10        | R.LEQLERMQIVEK.N                                 |
| <a href="#">6984</a>  | 858.6241        | 1715.2337        | 1714.9804        | 0.2534         | 2        | 1         | 1e+02         | 8         | R.MQIVEKNIPQKFLK.R                               |
| <a href="#">7192</a>  | <b>580.9549</b> | <b>1739.8427</b> | <b>1740.7438</b> | <b>-0.9011</b> | <b>0</b> | <b>2</b>  | <b>84</b>     | <b>10</b> | <b>K.TYGLDDESNAGVSEER.K</b>                      |
| <a href="#">7358</a>  | <b>878.8766</b> | <b>1755.7387</b> | <b>1754.8628</b> | <b>0.8759</b>  | <b>0</b> | <b>49</b> | <b>0.0018</b> | <b>1</b>  | <b>R.EVFGLFDPGNTGFVTR.D</b> <a href="#">7348</a> |
| <a href="#">13750</a> | 852.2502        | 2553.7287        | 2552.1204        | 1.6083         | 1        | 4         | 47            | 2         | K.YHGDDAKEEDLTHPEDIEHFR.R                        |

391. [gi|220689992|gb|EED46342.1|](#) **Mass:** 46230 **Score:** 48 **Queries matched:** 16 **emPAI:** 0.15

ran GTPase activating protein 1 (RNAI protein) [Aspergillus flavus NRRL3357]

| Query                 | Observed         | Mr(expt)         | Mr(calc)         | Delta          | Miss     | Score     | Expect       | Rank      | Peptide                                                     |
|-----------------------|------------------|------------------|------------------|----------------|----------|-----------|--------------|-----------|-------------------------------------------------------------|
| <a href="#">894</a>   | <b>501.5586</b>  | <b>1001.1027</b> | <b>1001.5505</b> | <b>-0.4478</b> | <b>0</b> | <b>24</b> | <b>0.74</b>  | <b>1</b>  | <b>R.QEGISSLLR.E</b>                                        |
| <a href="#">1466</a>  | 560.4696         | 1118.9247        | 1119.5131        | -0.5884        | 0        | 9         | 22           | 5         | R.AYEVHAAGMR.S                                              |
| <a href="#">1660</a>  | 575.6406         | 1149.2667        | 1148.5972        | 0.6695         | 1        | 13        | 8.4          | 4         | R.SVKMTQNGIR.Q                                              |
| <a href="#">1770</a>  | <b>588.0461</b>  | <b>1174.0777</b> | <b>1172.5925</b> | <b>1.4853</b>  | <b>0</b> | <b>11</b> | <b>14</b>    | <b>1</b>  | <b>K.EVDELAELGK.T</b>                                       |
| <a href="#">3121</a>  | <b>1351.7030</b> | <b>1350.6957</b> | <b>1349.6827</b> | <b>1.0130</b>  | <b>0</b> | <b>18</b> | <b>2.2</b>   | <b>1</b>  | <b>R.LQYNDITAEGVK.Q</b>                                     |
| <a href="#">3445</a>  | 692.1416         | 1382.2687        | 1380.6456        | 1.6231         | 0        | 6         | 39           | 3         | R.LGGNTFGVTACER.L                                           |
| <a href="#">4083</a>  | 729.3076         | 1456.6007        | 1456.7998        | -0.1990        | 1        | 24        | 0.58         | 2         | R.QEGISSLLREGLR.H <a href="#">4084</a> <a href="#">4103</a> |
| <a href="#">5508</a>  | <b>535.4422</b>  | <b>1603.3047</b> | <b>1601.9756</b> | <b>1.3291</b>  | <b>0</b> | <b>25</b> | <b>0.49</b>  | <b>1</b>  | <b>R.LIEEIPIALTHLLK.A</b> <a href="#">5507</a>              |
| <a href="#">8052</a>  | <b>606.7395</b>  | <b>1817.1967</b> | <b>1817.9418</b> | <b>-0.7450</b> | <b>1</b> | <b>4</b>  | <b>58</b>    | <b>8</b>  | <b>K.MTQNGIRQEGISSLLR.E</b>                                 |
| <a href="#">10901</a> | <b>718.5989</b>  | <b>2152.7747</b> | <b>2152.1528</b> | <b>0.6219</b>  | <b>0</b> | <b>34</b> | <b>0.046</b> | <b>1</b>  | <b>K.ALLEIPTLHTVNLSDNAFGK.R</b> <a href="#">10912</a>       |
| <a href="#">12832</a> | <b>811.2989</b>  | <b>2430.8747</b> | <b>2431.1947</b> | <b>-0.3200</b> | <b>2</b> | <b>1</b>  | <b>84</b>    | <b>10</b> | <b>K.EVPQLESIVCGRNRENGSMK.A</b>                             |
| <a href="#">12880</a> | 813.1729         | 2436.4967        | 2437.1543        | -0.6576        | 2        | 2         | 70           | 7         | R.RIELNGNKFMEEDDNVTELR.E                                    |

392. [gi|8308146|gb|AAF74493.1|AF261856\\_1](#) **Mass:** 9498 **Score:** 47 **Queries matched:** 5 **emPAI:** 0.36

O-methyltransferase [Aspergillus flavus]

| Query                 | Observed        | Mr(expt)         | Mr(calc)         | Delta         | Miss     | Score    | Expect    | Rank     | Peptide                                                |
|-----------------------|-----------------|------------------|------------------|---------------|----------|----------|-----------|----------|--------------------------------------------------------|
| <a href="#">10289</a> | 690.5172        | 2068.5297        | 2066.9585        | 1.5712        | 0        | 41       | 0.011     | 1        | R.FIFEEVAPDQYAHTDASK.M <a href="#">10286</a>           |
| <a href="#">12165</a> | 777.2165        | 2328.6277        | 2327.1586        | 1.4691        | 0        | 2        | 80        | 10       | K.GKPPSWNVSPFSLAFDPTNGL.-                              |
| <a href="#">12169</a> | <b>777.3342</b> | <b>2328.9807</b> | <b>2328.1427</b> | <b>0.8381</b> | <b>0</b> | <b>7</b> | <b>27</b> | <b>1</b> | <b>K.GKPPSWNVSPFSLAFDPTDGL.-</b> <a href="#">12176</a> |

Proteins matching the same set of peptides:

[gi|8308150|gb|AAF74495.1|AF261858\\_1](#) Mass: 9498 Score: 47 Queries matched: 5  
O-methyltransferase [Aspergillus flavus]

393. [gi|220697698|gb|EED54038.1|](#) Mass: 58603 Score: 47 Queries matched: 21 emPAI: 0.12  
hypothetical protein AFLA\_012900 [Aspergillus flavus NRRL3357]

| Query                 | Observed  | Mr(expt)  | Mr(calc)  | Delta   | Miss | Score | Expect  | Rank | Peptide                                                    |
|-----------------------|-----------|-----------|-----------|---------|------|-------|---------|------|------------------------------------------------------------|
| <a href="#">473</a>   | 444.5156  | 887.0167  | 887.4712  | -0.4545 | 0    | 8     | 37      | 4    | K.NGIVEGATK.D <a href="#">469</a>                          |
| <a href="#">1392</a>  | 554.1691  | 1106.3237 | 1104.5597 | 1.7640  | 0    | 8     | 25      | 6    | K.EMIAAGTQLR.L                                             |
| <a href="#">2562</a>  | 645.5886  | 1289.1627 | 1289.6761 | -0.5134 | 1    | 6     | 46      | 3    | K.GKEMIAAGTQLR.L <a href="#">2574</a> <a href="#">2586</a> |
| <a href="#">2632</a>  | 648.8791  | 1295.7437 | 1295.6907 | 0.0530  | 0    | 17    | 3.4     | 1    | R.LPLTDLVNHMK.G                                            |
| <a href="#">2773</a>  | 657.6781  | 1313.3417 | 1312.7755 | 0.5662  | 0    | 53    | 0.00074 | 1    | R.IPGVLT'TWISVK.G                                          |
| <a href="#">3078</a>  | 674.3671  | 1346.7197 | 1347.6419 | -0.9222 | 0    | 7     | 35      | 2    | K.DYTIQLDPGNGR.G <a href="#">3080</a>                      |
| <a href="#">3421</a>  | 690.1651  | 1378.3157 | 1376.7234 | 1.5923  | 0    | 31    | 0.13    | 1    | R.LIVSLFNCAGQR.I <a href="#">3414</a>                      |
| <a href="#">8805</a>  | 634.0499  | 1899.1277 | 1896.9581 | 2.1696  | 0    | 5     | 42      | 4    | K.NLAAPIETGITEHFADAK.E <a href="#">8784</a>                |
| <a href="#">12107</a> | 774.6892  | 2321.0457 | 2320.1547 | 0.8910  | 1    | 2     | 87      | 4    | R.IESNGGTT'FPDSKNGIVEGATK.D                                |
| <a href="#">13408</a> | 836.9709  | 2507.8907 | 2506.2533 | 1.6374  | 2    | 2     | 71      | 1    | - .MERLPLTDLVNHMKGHQTTNR.W                                 |
| <a href="#">14217</a> | 883.4865  | 2647.4377 | 2648.3890 | -0.9513 | 2    | 1     | 97      | 2    | K.GKEMIAAGTQLRLIVSLFNCAGQR.I <a href="#">14223</a>         |
| <a href="#">15471</a> | 1004.9949 | 3011.9627 | 3013.5154 | -1.5526 | 1    | 1     | 75      | 10   | K.ASSASVIISHTMANCFFIPSLRNFK.N <a href="#">15474</a>        |
| <a href="#">16409</a> | 1165.7999 | 3494.3777 | 3494.8926 | -0.5149 | 2    | 3     | 42      | 2    | K.LLEPVAFNFSITPPDNDRRIPGVLTTWISVK.G                        |

394. [gi|220691608|gb|EED47956.1|](#) Mass: 23872 Score: 47 Queries matched: 3 emPAI: 0.14  
endosomal cargo receptor (Erp3), putative [Aspergillus flavus NRRL3357]

| Query                | Observed | Mr(expt)  | Mr(calc)  | Delta  | Miss | Score | Expect  | Rank | Peptide           |
|----------------------|----------|-----------|-----------|--------|------|-------|---------|------|-------------------|
| <a href="#">113</a>  | 723.4480 | 722.4407  | 722.3711  | 0.0696 | 0    | 17    | 2.7     | 9    | R.NFSTVR.S        |
| <a href="#">2975</a> | 668.6536 | 1335.2927 | 1334.5714 | 0.7214 | 0    | 47    | 0.0031  | 1    | K.ACFYNYVDQR.N    |
| <a href="#">3987</a> | 723.8581 | 1445.7017 | 1444.7998 | 0.9020 | 1    | 1     | 1.2e+02 | 2    | K.LSAQLSTISRNQK.Y |

395. [gi|220690403|gb|EED46752.1|](#) Mass: 46343 Score: 47 Queries matched: 15 emPAI: 0.15  
nucleosome assembly protein Nap1, putative [Aspergillus flavus NRRL3357]

| Query                 | Observed | Mr(expt)  | Mr(calc)  | Delta   | Miss | Score | Expect | Rank | Peptide                                   |
|-----------------------|----------|-----------|-----------|---------|------|-------|--------|------|-------------------------------------------|
| <a href="#">2511</a>  | 642.6796 | 1283.3447 | 1282.6128 | 0.7319  | 0    | (8)   | 26     | 1    | R.MEYLDKPGFR.L                            |
| <a href="#">2656</a>  | 650.5111 | 1299.0077 | 1298.6077 | 0.4000  | 0    | 8     | 25     | 2    | R.MEYLDKPGFR.L                            |
| <a href="#">3393</a>  | 688.7266 | 1375.4387 | 1374.7143 | 0.7244  | 0    | 39    | 0.024  | 1    | R.SSGYIESLPAPVR.R <a href="#">3417</a>    |
| <a href="#">3421</a>  | 690.1651 | 1378.3157 | 1377.8092 | 0.5065  | 2    | 4     | 64     | 10   | R.VAGLKGIQKEHAK.L                         |
| <a href="#">4481</a>  | 502.1382 | 1503.3927 | 1502.7729 | 0.6198  | 2    | 9     | 21     | 2    | K.IDWKDDKDLTVR.V <a href="#">4479</a>     |
| <a href="#">7070</a>  | 863.2111 | 1724.4077 | 1722.8651 | 1.5426  | 0    | 30    | 0.13   | 1    | K.VSSTAGIPEFWLSAMK.N <a href="#">7073</a> |
| <a href="#">7196</a>  | 871.0721 | 1740.1297 | 1738.8600 | 1.2697  | 0    | (8)   | 26     | 2    | K.VSSTAGIPEFWLSAMK.N                      |
| <a href="#">9387</a>  | 657.5512 | 1969.6317 | 1969.9705 | -0.3388 | 1    | 4     | 57     | 2    | R.RATIVNGAAEPTDGEVDAGK.G                  |
| <a href="#">9667</a>  | 668.7089 | 2003.1047 | 2000.8388 | 2.2659  | 0    | 3     | 76     | 6    | K.EENGYGGDFIYDHAEGTK.I                    |
| <a href="#">10545</a> | 702.2469 | 2103.7187 | 2103.0266 | 0.6921  | 1    | 19    | 1.9    | 1    | K.NQISLAEMVTERDEEALR.H                    |



[10775](#) 713.7199 2138.1377 2137.8771 0.2606 1 6 32 2 R.KSDGDVDDDSDEEDGTSKPK.K  
[11902](#) 766.2862 2295.8367 2297.1903 -1.3535 2 3 63 2 K.EHAKLEAQFQEEVLELEKK.Y

396. [gi|220690768|gb|EED47117.1|](#) Mass: 66062 Score: 46 Queries matched: 33 emPAI: 0.05

histidyl-tRNA synthetase, mitochondrial precursor [Aspergillus flavus NRRL3357]

| Query                 | Observed        | Mr(expt)         | Mr(calc)         | Delta          | Miss     | Score      | Expect         | Rank     | Peptide                                                     |
|-----------------------|-----------------|------------------|------------------|----------------|----------|------------|----------------|----------|-------------------------------------------------------------|
| <a href="#">1116</a>  | 527.8051        | 1053.5957        | 1053.5277        | 0.0680         | 1        | 11         | 10             | 6        | K.GFTGMLKER.M <a href="#">1128</a>                          |
| <a href="#">1372</a>  | 551.9041        | 1101.7937        | 1101.5666        | 0.2272         | 0        | 9          | 23             | 8        | K.DEALLANASAK.A                                             |
| <a href="#">2138</a>  | 621.7116        | 1241.4087        | 1240.5394        | 0.8693         | 0        | 8          | 23             | 10       | K.EMGLEDGHPEK.E                                             |
| <a href="#">2672</a>  | 651.6126        | 1301.2107        | 1300.7099        | 0.5009         | 2        | 11         | 15             | 2        | R.LEREKSAEALR.S <a href="#">2668</a>                        |
| <a href="#">2736</a>  | 655.4586        | 1308.9027        | 1309.7394        | -0.8367        | 1        | 4          | 57             | 6        | R.IFTTIADVFKR.H <a href="#">2741</a>                        |
| <a href="#">3221</a>  | 454.5569        | 1360.6487        | 1357.7176        | 2.9311         | 2        | 10         | 17             | 8        | K.LDKMPWADVRK.E                                             |
| <a href="#">3389</a>  | 688.6636        | 1375.3127        | 1373.7125        | 1.6002         | 2        | (2)        | 1e+02          | 7        | K.LDKMPWADVRK.E                                             |
| <a href="#">3465</a>  | 462.7452        | 1385.2137        | 1382.8245        | 2.3892         | 0        | 7          | 30             | 5        | R.ALTATAAVRPTALK.N                                          |
| <a href="#">3979</a>  | <b>482.7515</b> | <b>1445.2327</b> | <b>1446.7112</b> | <b>-1.4784</b> | <b>1</b> | <b>11</b>  | <b>13</b>      | <b>1</b> | <b>R.WLAMNPDVRSMK.R</b>                                     |
| <a href="#">4294</a>  | <b>741.1851</b> | <b>1480.3557</b> | <b>1478.7010</b> | <b>1.6547</b>  | <b>1</b> | <b>(1)</b> | <b>1.2e+02</b> | <b>4</b> | <b>R.WLAMNPDVRSMK.R</b>                                     |
| <a href="#">4537</a>  | 756.7096        | 1511.4047        | 1511.7733        | -0.3685        | 0        | 4          | 63             | 8        | R.HGGTALDTPVFELR.E                                          |
| <a href="#">4794</a>  | 769.8886        | 1537.7627        | 1535.7225        | 2.0403         | 0        | 4          | 60             | 6        | R.MNVCQTLWNAGVK.A                                           |
| <a href="#">5795</a>  | <b>542.7999</b> | <b>1625.3777</b> | <b>1622.9580</b> | <b>2.4197</b>  | <b>2</b> | <b>3</b>   | <b>76</b>      | <b>5</b> | <b>R.SARRAIADPVVVTLR.R</b>                                  |
| <a href="#">6289</a>  | <b>832.7711</b> | <b>1663.5277</b> | <b>1661.8413</b> | <b>1.6864</b>  | <b>0</b> | <b>5</b>   | <b>46</b>      | <b>1</b> | <b>K.IVTEVFEELGWQGR.Y</b>                                   |
| <a href="#">8085</a>  | 607.8189        | 1820.4347        | 1820.8662        | -0.4314        | 1        | 5          | 45             | 3        | K.ERMNVCQTLWNAGVK.A                                         |
| <a href="#">8598</a>  | <b>627.1965</b> | <b>1878.5677</b> | <b>1878.9146</b> | <b>-0.3468</b> | <b>0</b> | <b>1</b>   | <b>1.1e+02</b> | <b>6</b> | <b>K.LIYDLQDQGGEICSLR.Y</b>                                 |
| <a href="#">9886</a>  | <b>677.0765</b> | <b>2028.2077</b> | <b>2027.1150</b> | <b>1.0927</b>  | <b>1</b> | <b>43</b>  | <b>0.0069</b>  | <b>1</b> | <b>R.DLLETLLKDEALLANASAK.A <a href="#">9890</a></b>         |
| <a href="#">11230</a> | 732.7339        | 2195.1797        | 2194.0439        | 1.1358         | 1        | 0          | 1.2e+02        | 10       | R.SSEVDAFVMFAGGKGFTGMLK.E                                   |
| <a href="#">12177</a> | 777.6382        | 2329.8927        | 2327.1177        | 2.7750         | 0        | 1          | 92             | 8        | K.AGLEDMGLLMDYLEAFGVLDLDR.I <a href="#">12150</a>           |
| <a href="#">13576</a> | <b>843.6939</b> | <b>2528.0597</b> | <b>2525.2914</b> | <b>2.7683</b>  | <b>2</b> | <b>1</b>   | <b>92</b>      | <b>3</b> | <b>K.DWSGSDALLRDRIFTTIADVFK.R</b>                           |
| <a href="#">13663</a> | <b>847.8069</b> | <b>2540.3987</b> | <b>2541.2508</b> | <b>-0.8521</b> | <b>2</b> | <b>2</b>   | <b>83</b>      | <b>2</b> | <b>R.YDLTVPFARWLANPDVRSMK.R</b>                             |
| <a href="#">13760</a> | <b>852.6399</b> | <b>2554.8977</b> | <b>2555.2447</b> | <b>-0.3470</b> | <b>2</b> | <b>3</b>   | <b>61</b>      | <b>8</b> | <b>K.GFTGMLKERMNVCQTLWNAGVK.A <a href="#">13771</a></b>     |
| <a href="#">14539</a> | <b>899.2945</b> | <b>2694.8617</b> | <b>2695.4545</b> | <b>-0.5927</b> | <b>2</b> | <b>4</b>   | <b>48</b>      | <b>4</b> | <b>K.AAEQGGVPPFAVILGEDELAEGKVRK.E <a href="#">14538</a></b> |
| <a href="#">14799</a> | 918.5162        | 2752.5267        | 2750.3698        | 2.1569         | 1        | 1          | 87             | 5        | R.SNDPTLVGVSVAAGGRYDNLVGMFLPK.A                             |
| <a href="#">14902</a> | <b>927.6592</b> | <b>2779.9557</b> | <b>2777.3793</b> | <b>2.5764</b>  | <b>1</b> | <b>0</b>   | <b>1e+02</b>   | <b>3</b> | <b>K.EMGLEDGHPEKEGVLVDLASLPAEVK.A</b>                       |
| <a href="#">16123</a> | 1106.2262       | 3315.6567        | 3314.8099        | 0.8468         | 1        | 1          | 70             | 6        | R.ALTATAAVRPTALKNIISTSSIHDPPTIPHYR.H                        |

397. [gi|220692215|gb|EED48562.1|](#) Mass: 50812 Score: 46 Queries matched: 11 emPAI: 0.06

conserved hypothetical protein [Aspergillus flavus NRRL3357]

| Query                | Observed        | Mr(expt)         | Mr(calc)         | Delta         | Miss     | Score    | Expect         | Rank     | Peptide                                   |
|----------------------|-----------------|------------------|------------------|---------------|----------|----------|----------------|----------|-------------------------------------------|
| <a href="#">785</a>  | 490.1251        | 978.2357         | 977.4600         | 0.7757        | 0        | 9        | 20             | 2        | K.LNSIDNMR.V <a href="#">787</a>          |
| <a href="#">1445</a> | 1116.4290       | 1115.4217        | 1114.6094        | 0.8123        | 2        | 4        | 64             | 5        | R.KLDRIDEAR.V                             |
| <a href="#">1541</a> | <b>565.8191</b> | <b>1129.6237</b> | <b>1127.5247</b> | <b>2.0990</b> | <b>0</b> | <b>2</b> | <b>1.3e+02</b> | <b>3</b> | <b>R.ETDLFGYQR.K <a href="#">1542</a></b> |

|                       |                 |                  |                  |               |          |           |               |          |                                                          |
|-----------------------|-----------------|------------------|------------------|---------------|----------|-----------|---------------|----------|----------------------------------------------------------|
| <a href="#">3391</a>  | 688.6986        | 1375.3827        | 1376.6718        | -1.2891       | 1        | 2         | 1e+02         | 4        | K.LNSIDNMRVDGK.F                                         |
| <a href="#">3790</a>  | 476.1852        | 1425.5337        | 1423.9238        | 1.6099        | 2        | 5         | 46            | 8        | R.LLRTRDALLLIK.Q                                         |
| <a href="#">5967</a>  | 547.7352        | 1640.1837        | 1639.8318        | 0.3519        | 2        | 1         | 1.2e+02       | 9        | R.ETDLFGYQRKLDL.R                                        |
| <a href="#">13954</a> | <b>864.9849</b> | <b>2591.9327</b> | <b>2590.4330</b> | <b>1.4997</b> | <b>0</b> | <b>46</b> | <b>0.0028</b> | <b>1</b> | <b>K.LQSGLAQLSPELVSTHETLVSILR.S</b>                      |
| <a href="#">14208</a> | <b>883.0562</b> | <b>2646.1467</b> | <b>2645.2829</b> | <b>0.8638</b> | <b>2</b> | <b>3</b>  | <b>57</b>     | <b>1</b> | <b>R.CLLEVKESGGVANSRELYPYSMK.L</b> <a href="#">14203</a> |

398. [gi|220699636|gb|EED55975.1|](#) Mass: 25091 Score: 46 Queries matched: 12 emPAI: 0.13

phosphoglycolate phosphatase, putative [Aspergillus flavus NRRL3357]

| Query                 | Observed         | Mr(expt)         | Mr(calc)         | Delta         | Miss     | Score    | Expect    | Rank     | Peptide                                                                       |
|-----------------------|------------------|------------------|------------------|---------------|----------|----------|-----------|----------|-------------------------------------------------------------------------------|
| <a href="#">1438</a>  | 557.8341         | 1113.6537        | 1113.6506        | 0.0031        | 1        | 22       | 1         | 3        | K.GVAAVKTALER.N <a href="#">1437</a>                                          |
| <a href="#">2537</a>  | 429.7132         | 1286.1177        | 1284.7302        | 1.3875        | 0        | 10       | 18        | 5        | K.AHHVPIAIVSNK.G <a href="#">2551</a>                                         |
| <a href="#">2590</a>  | <b>646.8021</b>  | <b>1291.5897</b> | <b>1290.6932</b> | <b>0.8965</b> | <b>0</b> | <b>7</b> | <b>31</b> | <b>2</b> | <b>R.LIASGAGLADTFR.A</b> <a href="#">2597</a>                                 |
| <a href="#">3720</a>  | 709.1546         | 1416.2947        | 1415.7660        | 0.5287        | 0        | 46       | 0.0042    | 1        | K.AFPGAQELLETELK.A                                                            |
| <a href="#">11931</a> | <b>1150.8066</b> | <b>2299.5987</b> | <b>2297.2015</b> | <b>2.3972</b> | <b>1</b> | <b>2</b> | <b>79</b> | <b>1</b> | <b>R.NGLAGYVPEELIIGDKTPGAQR.K</b> <a href="#">11915</a> <a href="#">11926</a> |
| <a href="#">12474</a> | 794.7462         | 2381.2167        | 2380.3703        | 0.8465        | 2        | 1        | 85        | 3        | K.AHHVPIAIVSNKGVAAVKTALER.N                                                   |
| <a href="#">15722</a> | 1035.3975        | 3103.1707        | 3100.6306        | 2.5401        | 1        | 1        | 81        | 8        | R.FGINVVADEGVLVVGDTVADIQFARNIGGR.V                                            |

399. [gi|220697818|gb|EED54158.1|](#) Mass: 12041 Score: 46 Queries matched: 2 emPAI: 0.29

conserved hypothetical protein [Aspergillus flavus NRRL3357]

| Query                | Observed        | Mr(expt)         | Mr(calc)         | Delta         | Miss     | Score     | Expect        | Rank     | Peptide                                           |
|----------------------|-----------------|------------------|------------------|---------------|----------|-----------|---------------|----------|---------------------------------------------------|
| <a href="#">9473</a> | <b>660.9302</b> | <b>1979.7687</b> | <b>1977.9068</b> | <b>1.8619</b> | <b>0</b> | <b>45</b> | <b>0.0038</b> | <b>1</b> | <b>R.GGENFTETAHEIELEFR.D</b> <a href="#">9455</a> |

400. [gi|220701324|gb|EED57662.1|](#) Mass: 46400 Score: 46 Queries matched: 2 emPAI: 0.07

fatty acid hydroxylase, putative [Aspergillus flavus NRRL3357]

| Query                | Observed        | Mr(expt)         | Mr(calc)         | Delta         | Miss     | Score     | Expect       | Rank     | Peptide                      |
|----------------------|-----------------|------------------|------------------|---------------|----------|-----------|--------------|----------|------------------------------|
| <a href="#">2724</a> | 436.8105        | 1307.4097        | 1304.7313        | 2.6784        | 2        | 8         | 25           | 6        | R.VYRQLRLSDR.V               |
| <a href="#">7428</a> | <b>882.4406</b> | <b>1762.8667</b> | <b>1761.8937</b> | <b>0.9730</b> | <b>0</b> | <b>46</b> | <b>0.004</b> | <b>1</b> | <b>K.GGESAPLFGNFLEPLSK.T</b> |

401. [gi|220699278|gb|EED55617.1|](#) Score: 45 Queries matched: 10

tartrate dehydrogenase, putative [Aspergillus flavus NRRL3357]

| Query                 | Observed        | Mr(expt)         | Mr(calc)         | Delta         | Miss     | Score    | Expect    | Rank     | Peptide                          |
|-----------------------|-----------------|------------------|------------------|---------------|----------|----------|-----------|----------|----------------------------------|
| <a href="#">842</a>   | 495.5941        | 989.1737         | 988.5488         | 0.6250        | 1        | 40       | 0.018     | 3        | R.VGIERIMR.F <a href="#">843</a> |
| <a href="#">1028</a>  | 519.6511        | 1037.2877        | 1037.4522        | -0.1644       | 0        | 6        | 44        | 3        | K.QLMDCVEK.V                     |
| <a href="#">3279</a>  | <b>456.1765</b> | <b>1365.5077</b> | <b>1363.7493</b> | <b>1.7584</b> | <b>1</b> | <b>8</b> | <b>26</b> | <b>8</b> | <b>K.LLTVVTKSNSMR.N</b>          |
| <a href="#">4379</a>  | 498.0805        | 1491.2197        | 1491.8443        | -0.6246       | 2        | 1        | 1.1e+02   | 10       | R.KLLTVVTKSNSMR.N                |
| <a href="#">8324</a>  | 617.3719        | 1849.0937        | 1850.9937        | -1.9000       | 2        | 2        | 83        | 10       | R.IMRFAFEVAQSRPRK.L              |
| <a href="#">9853</a>  | 676.3122        | 2025.9147        | 2024.0902        | 1.8245        | 2        | 2        | 83        | 7        | R.VSDLTSSARSLESRIYK.M            |
| <a href="#">10902</a> | 718.6545        | 2152.9417        | 2154.0126        | -1.0709       | 1        | 1        | 98        | 7        | K.DFPDVTWDKMLVDAMTVR.M           |

[12023](#) 771.1449 2310.4127 2308.2435 2.1692 2 3 68 3 -.MLSFIVMKIKDTNIIYSR.C  
[16342](#) 1149.2565 3444.7477 3445.6892 -0.9414 1 1 74 6 K.QLMDCVEKCAAGILTPDLGGTSTNTQGVVDAVK.K

402. [gi|220694833|gb|EED51177.1|](#) Mass: 38700 Score: 45 Queries matched: 10 emPAI: 0.09

aflU / cypA / P450 monooxygenase [Aspergillus flavus NRRL3357]

| Query                 | Observed         | Mr(expt)         | Mr(calc)         | Delta          | Miss     | Score      | Expect    | Rank     | Peptide                                                                         |
|-----------------------|------------------|------------------|------------------|----------------|----------|------------|-----------|----------|---------------------------------------------------------------------------------|
| <a href="#">763</a>   | 488.5926         | 975.1707         | 976.4866         | -1.3158        | 0        | 12         | 12        | 8        | R.DLGFTAPEK.G <a href="#">765</a>                                               |
| <a href="#">2983</a>  | 669.1056         | 1336.1967        | 1335.7584        | 0.4383         | 0        | 45         | 0.0048    | 2        | R.TITITFMLAGLR.S <a href="#">2991</a> <a href="#">2996</a> <a href="#">3001</a> |
| <a href="#">5620</a>  | <b>538.2385</b>  | <b>1611.6937</b> | <b>1608.9021</b> | <b>2.7916</b>  | <b>1</b> | <b>9</b>   | <b>19</b> | <b>1</b> | <b>K.TRTITITFMLAGLR.S <a href="#">5594</a></b>                                  |
| <a href="#">10378</a> | <b>1041.3416</b> | <b>2080.6687</b> | <b>2081.1489</b> | <b>-0.4802</b> | <b>2</b> | <b>(3)</b> | <b>60</b> | <b>1</b> | <b>K.CISKTRTITITFMLAGLR.S</b>                                                   |
| <a href="#">10500</a> | <b>1049.9406</b> | <b>2097.8667</b> | <b>2097.1438</b> | <b>0.7229</b>  | <b>2</b> | <b>5</b>   | <b>43</b> | <b>2</b> | <b>K.CISKTRTITITFMLAGLR.S</b>                                                   |

403. [gi|220694637|gb|EED50981.1|](#) Mass: 11365 Score: 45 Queries matched: 10 emPAI: 0.30

histone H4, putative [Aspergillus flavus NRRL3357]

| Query                | Observed        | Mr(expt)         | Mr(calc)         | Delta         | Miss     | Score     | Expect        | Rank     | Peptide                                                              |
|----------------------|-----------------|------------------|------------------|---------------|----------|-----------|---------------|----------|----------------------------------------------------------------------|
| <a href="#">2057</a> | <b>615.3571</b> | <b>1228.6997</b> | <b>1227.5805</b> | <b>1.1192</b> | <b>0</b> | <b>9</b>  | <b>24</b>     | <b>1</b> | <b>R.ISAMIYEETR.G</b>                                                |
| <a href="#">2870</a> | <b>663.7216</b> | <b>1325.4287</b> | <b>1324.7463</b> | <b>0.6824</b> | <b>0</b> | <b>42</b> | <b>0.0098</b> | <b>1</b> | <b>R.DNIQGITKPAIR.R <a href="#">2872</a> <a href="#">2880</a></b>    |
| <a href="#">5359</a> | 796.2846        | 1590.5547        | 1591.9297        | -1.3750       | 2        | 1         | 1.2e+02       | 6        | K.RKTVTSLDVVYALK.R                                                   |
| <a href="#">6910</a> | <b>855.1756</b> | <b>1708.3367</b> | <b>1707.0155</b> | <b>1.3212</b> | <b>1</b> | <b>5</b>  | <b>51</b>     | <b>4</b> | <b>K.ILRDNIQGITKPAIR.R <a href="#">6887</a> <a href="#">6911</a></b> |
| <a href="#">7661</a> | 891.5046        | 1780.9947        | 1780.9505        | 0.0442        | 2        | 0         | 1.2e+02       | 4        | K.RISAMIYEETRGVLK.S <a href="#">7654</a>                             |

Proteins matching the same set of peptides:

[gi|220698170|gb|EED54510.1|](#) Mass: 11349 Score: 45 Queries matched: 10

histone H4.1 [Aspergillus flavus NRRL3357]

404. [gi|220698104|gb|EED54444.1|](#) Mass: 99516 Score: 45 Queries matched: 16 emPAI: 0.03

acetylglutamate kinase, putative [Aspergillus flavus NRRL3357]

| Query                 | Observed        | Mr(expt)         | Mr(calc)         | Delta          | Miss     | Score     | Expect         | Rank      | Peptide                                           |
|-----------------------|-----------------|------------------|------------------|----------------|----------|-----------|----------------|-----------|---------------------------------------------------|
| <a href="#">858</a>   | 994.5830        | 993.5757         | 992.5291         | 1.0467         | 1        | 4         | 66             | 10        | R.YVEGLKER.D <a href="#">859</a>                  |
| <a href="#">1996</a>  | 609.9801        | 1217.9457        | 1215.6207        | 2.3250         | 1        | 1         | 1.3e+02        | 10        | R.EGLDARATVER.Y                                   |
| <a href="#">3068</a>  | <b>673.7461</b> | <b>1345.4777</b> | <b>1344.7613</b> | <b>0.7164</b>  | <b>0</b> | <b>5</b>  | <b>51</b>      | <b>10</b> | <b>R.STVVQLLSNIGSK.R</b>                          |
| <a href="#">3210</a>  | <b>680.8361</b> | <b>1359.6577</b> | <b>1359.7915</b> | <b>-0.1337</b> | <b>2</b> | <b>5</b>  | <b>47</b>      | <b>4</b>  | <b>K.KDFPKLVWTVK.E</b>                            |
| <a href="#">3960</a>  | 722.6921        | 1443.3697        | 1441.8477        | 1.5220         | 2        | 8         | 22             | 6         | R.TAVRRASTSKPLR.A <a href="#">3966</a>            |
| <a href="#">4355</a>  | <b>744.9141</b> | <b>1487.8137</b> | <b>1486.7488</b> | <b>1.0649</b>  | <b>2</b> | <b>0</b>  | <b>1.5e+02</b> | <b>8</b>  | <b>R.DREGLDARATVER.Y</b>                          |
| <a href="#">7051</a>  | <b>862.3606</b> | <b>1722.7067</b> | <b>1720.8784</b> | <b>1.8283</b>  | <b>0</b> | <b>47</b> | <b>0.0028</b>  | <b>1</b>  | <b>K.SGWLTVADNVFASIK.K <a href="#">7038</a></b>   |
| <a href="#">7509</a>  | <b>885.7916</b> | <b>1769.5687</b> | <b>1769.8625</b> | <b>-0.2937</b> | <b>0</b> | <b>1</b>  | <b>1.2e+02</b> | <b>6</b>  | <b>R.FDSTWTYGLPELVSR.S</b>                        |
| <a href="#">8913</a>  | <b>637.7349</b> | <b>1910.1827</b> | <b>1909.9785</b> | <b>0.2042</b>  | <b>1</b> | <b>4</b>  | <b>49</b>      | <b>8</b>  | <b>K.IVYLAEKGLFNGDTGEK.I <a href="#">8914</a></b> |
| <a href="#">10153</a> | <b>686.0789</b> | <b>2055.2147</b> | <b>2054.1021</b> | <b>1.1126</b>  | <b>1</b> | <b>5</b>  | <b>44</b>      | <b>4</b>  | <b>R.ASTSKPLRAFSAHAISSAR.L</b>                    |
| <a href="#">12213</a> | 780.1909        | 2337.5507        | 2336.2165        | 1.3342         | 2        | 1         | 1.1e+02        | 6         | K.SGWLTVADNVFASIKDFPK.L                           |

[14715](#) 909.9859 2726.9357 2726.2680 0.6677 0 2 66 5 K.GAATQCLQNMNLALGYGEYQGIPLK.-

405. [gi|220700658|gb|EED56996.1|](#) Mass: 15438 Score: 44 Queries matched: 7 emPAI: 0.22

cytokinesis EF-hand protein Cdc4, putative [Aspergillus flavus NRRL3357]

| Query                 | Observed | Mr(expt)  | Mr(calc)  | Delta   | Miss | Score | Expect  | Rank | Peptide                                                                                  |
|-----------------------|----------|-----------|-----------|---------|------|-------|---------|------|------------------------------------------------------------------------------------------|
| <a href="#">1905</a>  | 601.4506 | 1200.8867 | 1200.6714 | 0.2153  | 0    | 44    | 0.007   | 1    | K.VSLESGLDLLR.A                                                                          |
| <a href="#">5733</a>  | 811.5536 | 1621.0927 | 1619.7831 | 1.3096  | 1    | 1     | 1.2e+02 | 8    | M.ASTNYKEAFSLFDK.R                                                                       |
| <a href="#">7469</a>  | 883.7726 | 1765.5307 | 1766.8185 | -1.2878 | 1    | 3     | 64      | 5    | -.MASTNYKEAFSLFDK.R                                                                      |
| <a href="#">10732</a> | 711.3279 | 2130.9617 | 2130.0569 | 0.9049  | 1    | 5     | 46      | 5    | R.GFQVFDKDMTGFIVGQLR.Y <a href="#">10713</a> <a href="#">10721</a> <a href="#">10724</a> |

406. [gi|220697389|gb|EED53730.1|](#) Mass: 54245 Score: 44 Queries matched: 11 emPAI: 0.06

aldehyde dehydrogenase, putative [Aspergillus flavus NRRL3357]

| Query                 | Observed  | Mr(expt)  | Mr(calc)  | Delta   | Miss | Score | Expect  | Rank | Peptide                              |
|-----------------------|-----------|-----------|-----------|---------|------|-------|---------|------|--------------------------------------|
| <a href="#">486</a>   | 897.4690  | 896.4617  | 895.4624  | 0.9993  | 1    | 16    | 3.1     | 2    | K.DIERAHR.V                          |
| <a href="#">1420</a>  | 556.0711  | 1110.1277 | 1108.5877 | 1.5400  | 0    | 44    | 0.0065  | 1    | K.VAFTGSTLTGR.E <a href="#">1422</a> |
| <a href="#">2775</a>  | 438.9265  | 1313.7577 | 1314.7408 | -0.9831 | 1    | 11    | 13      | 5    | R.VPFGGIKQSGIGR.E                    |
| <a href="#">3782</a>  | 713.6481  | 1425.2817 | 1423.8221 | 1.4596  | 1    | 2     | 89      | 10   | K.LLPPTDRGALMLK.L                    |
| <a href="#">6870</a>  | 569.4369  | 1705.2887 | 1706.9501 | -1.6614 | 1    | 5     | 46      | 3    | R.GALMLKLADLIEQHR.E                  |
| <a href="#">10453</a> | 698.2325  | 2091.6757 | 2091.0596 | 0.6161  | 1    | 1     | 1.1e+02 | 10   | K.QSGIGRELGEAGLEAYSQVK.A             |
| <a href="#">12693</a> | 805.5509  | 2413.6307 | 2412.2648 | 1.3659  | 1    | 3     | 67      | 3    | R.ELGEAGLEAYSQVKAIHVNLSK.L           |
| <a href="#">13869</a> | 859.1725  | 2574.4957 | 2572.3384 | 2.1573  | 1    | 3     | 60      | 3    | K.NITLETGGKSPVVFGDADIEQAQK.W         |
| <a href="#">15498</a> | 1009.7075 | 3026.1007 | 3024.4651 | 1.6356  | 1    | 3     | 51      | 2    | R.VASEIEAGMVWINSSNDSDFRVPFGGIK.Q     |
| <a href="#">16093</a> | 1100.5492 | 3298.6257 | 3295.8287 | 2.7970  | 0    | 6     | 22      | 1    | K.LGPALACGNTIVMKPAEQTPLSILYLATLIK.E  |

407. [gi|89212054|gb|ABD63389.1|](#) Mass: 10162 Score: 44 Queries matched: 3 emPAI: 0.34

O-methyltransferase B [Aspergillus parasiticus]

| Query                 | Observed | Mr(expt)  | Mr(calc)  | Delta   | Miss | Score | Expect | Rank | Peptide                             |
|-----------------------|----------|-----------|-----------|---------|------|-------|--------|------|-------------------------------------|
| <a href="#">1185</a>  | 534.6666 | 1067.3187 | 1066.6386 | 0.6801  | 0    | 39    | 0.02   | 1    | K.EQAILVAVPK.R <a href="#">1186</a> |
| <a href="#">14467</a> | 895.1245 | 2682.3517 | 2683.2687 | -0.9170 | 1    | 6     | 27     | 1    | R.AEWDDLMEQAGLEIIQSKVYDSK.E         |

408. [gi|220701646|gb|EED57984.1|](#) Mass: 31064 Score: 43 Queries matched: 5 emPAI: 0.11

pyruvate dehydrogenase complex component Pdx1, putative [Aspergillus flavus NRRL3357]

| Query                 | Observed  | Mr(expt)  | Mr(calc)  | Delta   | Miss | Score | Expect | Rank | Peptide                                    |
|-----------------------|-----------|-----------|-----------|---------|------|-------|--------|------|--------------------------------------------|
| <a href="#">5218</a>  | 790.7716  | 1579.5287 | 1580.8410 | -1.3122 | 1    | 10    | 16     | 2    | K.GIPDSEVSKIPASGPK.G <a href="#">5231</a>  |
| <a href="#">8254</a>  | 921.9626  | 1841.9107 | 1841.0411 | 0.8696  | 0    | 43    | 0.0065 | 1    | K.IQETLGVNVPLATFLAR.A <a href="#">8267</a> |
| <a href="#">11291</a> | 1104.2441 | 2206.4737 | 2205.1066 | 1.3671  | 0    | 29    | 0.16   | 1    | K.GDVLAYLGSIPADYPATQQR.F                   |

409. [gi|220690307|gb|EED46657.1|](#) Mass: 128071 Score: 43 Queries matched: 25 emPAI: 0.05

cytoskeleton assembly control protein Sla2, putative [Aspergillus flavus NRRL3357]

| Query                 | Observed         | Mr(expt)         | Mr(calc)         | Delta         | Miss     | Score     | Expect        | Rank     | Peptide                                        |
|-----------------------|------------------|------------------|------------------|---------------|----------|-----------|---------------|----------|------------------------------------------------|
| <a href="#">892</a>   | 501.3986         | 1000.7827        | 1001.5658        | -0.7831       | 0        | 7         | 40            | 9        | R.GGIGYGPLIR.E                                 |
| <a href="#">1008</a>  | 517.4991         | 1032.9837        | 1031.5135        | 1.4703        | 0        | 6         | 42            | 10       | K.ATSIEESAPK.R                                 |
| <a href="#">1210</a>  | 536.5266         | 1071.0387        | 1070.4855        | 0.5532        | 0        | 10        | 16            | 8        | K.SSAAFWAGMK.V                                 |
| <a href="#">2891</a>  | <b>664.4941</b>  | <b>1326.9737</b> | <b>1326.7255</b> | <b>0.2482</b> | <b>1</b> | <b>4</b>  | <b>72</b>     | <b>9</b> | <b>K.AADAIDAAAARLAK.L</b>                      |
| <a href="#">3220</a>  | 454.5189         | 1360.5347        | 1358.6976        | 1.8371        | 1        | 6         | 42            | 10       | K.NLELADMIRER.D <a href="#">3210</a>           |
| <a href="#">4089</a>  | 729.6656         | 1457.3167        | 1457.7586        | -0.4419       | 2        | 1         | 1.3e+02       | 2        | K.AASAQEAIERREK.L                              |
| <a href="#">5324</a>  | <b>795.2286</b>  | <b>1588.4427</b> | <b>1586.8528</b> | <b>1.5899</b> | <b>2</b> | <b>6</b>  | <b>40</b>     | <b>1</b> | <b>K.KNNRWTEGLISAAK.A</b>                      |
| <a href="#">5570</a>  | 805.4036         | 1608.7927        | 1608.7565        | 0.0362        | 1        | 9         | 18            | 4        | K.YNREMADLEEALR.N <a href="#">5584</a>         |
| <a href="#">5753</a>  | 812.3366         | 1622.6587        | 1622.7531        | -0.0944       | 0        | 4         | 64            | 10       | K.SGMEQALMELEELK.M                             |
| <a href="#">6180</a>  | 828.8126         | 1655.6107        | 1652.9097        | 2.7010        | 1        | 1         | 1.1e+02       | 10       | R.QEHLDLLQTTKSLK.L                             |
| <a href="#">6382</a>  | <b>836.4076</b>  | <b>1670.8007</b> | <b>1669.8999</b> | <b>0.9008</b> | <b>0</b> | <b>16</b> | <b>4</b>      | <b>1</b> | <b>K.INDIIDSVLQTVQR.V</b>                      |
| <a href="#">6647</a>  | 844.8351         | 1687.6557        | 1688.9131        | -1.2573       | 2        | 1         | 1.1e+02       | 7        | R.ELKTKNLELADMIR.E                             |
| <a href="#">6767</a>  | 567.1769         | 1698.5087        | 1698.8689        | -0.3602       | 1        | 6         | 38            | 8        | R.GLQSFRLGLEADHK.T <a href="#">6760</a>        |
| <a href="#">6953</a>  | 856.9166         | 1711.8187        | 1711.8199        | -0.0012       | 0        | 9         | 18            | 2        | R.AMHTTTGDAEALPLR.G                            |
| <a href="#">8346</a>  | 618.1022         | 1851.2847        | 1850.8944        | 0.3903        | 2        | 4         | 51            | 6        | K.YNREMADLEEALRNK.N <a href="#">8348</a>       |
| <a href="#">11316</a> | 737.7875         | 2210.3407        | 2209.2113        | 1.1294        | 2        | 1         | 1.1e+02       | 8        | K.AVGAACRALVRQVQEIIAER.N <a href="#">11333</a> |
| <a href="#">11826</a> | 762.3272         | 2283.9597        | 2282.1978        | 1.7619        | 2        | 2         | 77            | 6        | R.ALVRQVQEIIAERNQDGSEK.V                       |
| <a href="#">14765</a> | <b>914.4429</b>  | <b>2740.3067</b> | <b>2738.4562</b> | <b>1.8505</b> | <b>1</b> | <b>2</b>  | <b>66</b>     | <b>1</b> | <b>R.NSPEQLIVASNDVAASTAQLVAASRVK.A</b>         |
| <a href="#">15536</a> | <b>1014.3139</b> | <b>3039.9197</b> | <b>3038.4370</b> | <b>1.4828</b> | <b>0</b> | <b>44</b> | <b>0.0042</b> | <b>1</b> | <b>K.ASASATEFSTAFNNFIADGPNSTHAEIIR.T</b>       |
| <a href="#">15740</a> | 1039.2892        | 3114.8457        | 3114.4339        | 0.4118        | 0        | 1         | 80            | 5        | K.TINDPNEGYESIDSLMTLQDQIDAFQK.L                |

410. [gi|220690854|gb|EED47203.1|](#) Mass: 48650 Score: 43 Queries matched: 13 emPAI: 0.22

MAP kinase MpkA [Aspergillus flavus NRRL3357]

| Query                 | Observed        | Mr(expt)         | Mr(calc)         | Delta         | Miss     | Score     | Expect        | Rank     | Peptide                                                              |
|-----------------------|-----------------|------------------|------------------|---------------|----------|-----------|---------------|----------|----------------------------------------------------------------------|
| <a href="#">980</a>   | 513.5516        | 1025.0887        | 1022.4855        | 2.6032        | 0        | 8         | 25            | 3        | R.MLAFDPSSR.I                                                        |
| <a href="#">2427</a>  | 638.3586        | 1274.7027        | 1274.6731        | 0.0296        | 1        | 7         | 33            | 7        | R.IGSPRAQEYVR.N <a href="#">2446</a>                                 |
| <a href="#">4747</a>  | 767.5886        | 1533.1627        | 1532.8688        | 0.2939        | 2        | 1         | 1.4e+02       | 9        | R.EIKLLQHFGRHR.N                                                     |
| <a href="#">5536</a>  | 536.3252        | 1605.9537        | 1607.8130        | -1.8592       | 1        | 6         | 41            | 4        | R.AQEYVRNLPFMPK.I                                                    |
| <a href="#">6207</a>  | <b>829.7526</b> | <b>1657.4907</b> | <b>1655.8519</b> | <b>1.6389</b> | <b>0</b> | <b>42</b> | <b>0.0097</b> | <b>1</b> | <b>R.LFPSANPDALDLLDR.M <a href="#">6180</a> <a href="#">6208</a></b> |
| <a href="#">9978</a>  | 1019.4761       | 2036.9377        | 2034.9873        | 1.9504        | 1        | 0         | 1.2e+02       | 4        | R.WYRAPEIMLSFYTK.A                                                   |
| <a href="#">13539</a> | <b>841.9062</b> | <b>2522.6967</b> | <b>2522.2628</b> | <b>0.4339</b> | <b>0</b> | <b>20</b> | <b>1.1</b>    | <b>1</b> | <b>R.SGQPLTDAHFQSFYQILCGLK.Y <a href="#">13550</a></b>               |
| <a href="#">14219</a> | 883.6535        | 2647.9387        | 2647.3639        | 0.5748        | 1        | 2         | 68            | 2        | K.ELGQGAYGIVCAATNIQTGEGVAIKK.V                                       |
| <a href="#">14666</a> | <b>907.3265</b> | <b>2718.9577</b> | <b>2717.3297</b> | <b>1.6281</b> | <b>0</b> | <b>19</b> | <b>1.3</b>    | <b>1</b> | <b>R.DYVDQLNQLHYLQTPNEETLSR.I</b>                                    |

411. [gi|220701288|gb|EED57626.1|](#) Mass: 20817 Score: 42 Queries matched: 13 emPAI: 0.16

mitochondrial F1F0-ATP synthase g subunit, putative [Aspergillus flavus NRRL3357]

| Query | Observed | Mr(expt) | Mr(calc) | Delta | Miss | Score | Expect | Rank | Peptide |
|-------|----------|----------|----------|-------|------|-------|--------|------|---------|
|-------|----------|----------|----------|-------|------|-------|--------|------|---------|

|                       |                 |                  |                  |               |          |           |             |           |                                                    |
|-----------------------|-----------------|------------------|------------------|---------------|----------|-----------|-------------|-----------|----------------------------------------------------|
| <a href="#">653</a>   | 475.5266        | 949.0387         | 948.4512         | 0.5875        | 0        | 5         | 50          | 9         | K.AGEAASSAASK.A                                    |
| <a href="#">1849</a>  | <b>595.6131</b> | <b>1189.2117</b> | <b>1187.6445</b> | <b>1.5673</b> | <b>1</b> | <b>4</b>  | <b>72</b>   | <b>10</b> | - <b>.MPATASRAVLR.Q</b>                            |
| <a href="#">2941</a>  | <b>666.5396</b> | <b>1331.0647</b> | <b>1330.6629</b> | <b>0.4018</b> | <b>0</b> | <b>42</b> | <b>0.01</b> | <b>1</b>  | <b>K.NANFVSPGDIAAR.V</b>                           |
| <a href="#">5323</a>  | 530.4609        | 1588.3607        | 1585.8325        | 2.5283        | 1        | 10        | 15          | 2         | K.NANFVSPGDIAARVR.N                                |
| <a href="#">8816</a>  | 634.3379        | 1899.9917        | 1901.0595        | -1.0678       | 2        | 1         | 1.1e+02     | 8         | M.PATASRAVLRQSQFLTR.R                              |
| <a href="#">9055</a>  | 964.1236        | 1926.2327        | 1927.0123        | -0.7796       | 0        | 7         | 30          | 4         | R.VTSTAGPALSNAQGVGSALR.K <a href="#">9083</a>      |
| <a href="#">9084</a>  | <b>644.2812</b> | <b>1929.8217</b> | <b>1928.9958</b> | <b>0.8260</b> | <b>0</b> | <b>5</b>  | <b>44</b>   | <b>1</b>  | <b>K.VIAFVDSMIPPTLYYGK.V</b> <a href="#">9086</a>  |
| <a href="#">13290</a> | 831.8555        | 2492.5447        | 2492.3349        | 0.2098        | 0        | 1         | 1e+02       | 7         | K.ELALAGVTLAEVIGFFTVGEMIGR.M                       |
| <a href="#">13923</a> | 862.7425        | 2585.2057        | 2584.3723        | 0.8334        | 2        | 2         | 75          | 4         | K.VGGRTGKVIAFVDSMIPPTLYYGK.V                       |
| <a href="#">14173</a> | 880.8819        | 2639.6237        | 2639.4284        | 0.1953        | 1        | 3         | 58          | 6         | K.VIAFVDSMIPPTLYYGKVGLELAK.L <a href="#">14171</a> |

412. [gi|220692411|gb|EED48758.1|](#) Mass: 69473 Score: 42 Queries matched: 19 emPAI: 0.05

cytoplasmic asparaginyl-tRNA synthetase, putative [Aspergillus flavus NRRL3357]

| Query                 | Observed        | Mr(expt)         | Mr(calc)         | Delta          | Miss     | Score     | Expect       | Rank     | Peptide                                                               |
|-----------------------|-----------------|------------------|------------------|----------------|----------|-----------|--------------|----------|-----------------------------------------------------------------------|
| <a href="#">1564</a>  | 567.2286        | 1132.4427        | 1131.5884        | 0.8543         | 1        | 4         | 64           | 6        | R.AAGDKEAITTR.V <a href="#">1562</a>                                  |
| <a href="#">2202</a>  | 625.2786        | 1248.5427        | 1249.6778        | -1.1351        | 2        | 4         | 63           | 5        | K.KATNLYEQRK.K                                                        |
| <a href="#">3730</a>  | 709.6186        | 1417.2227        | 1417.7354        | -0.5127        | 0        | 4         | 69           | 10       | R.ELHADFFTTIIGR.A <a href="#">3733</a>                                |
| <a href="#">4689</a>  | <b>509.8109</b> | <b>1526.4107</b> | <b>1526.8239</b> | <b>-0.4132</b> | <b>1</b> | <b>10</b> | <b>14</b>    | <b>1</b> | <b>R.HLVLRGETASAVMK.V</b>                                             |
| <a href="#">7161</a>  | 869.6546        | 1737.2947        | 1736.0560        | 1.2388         | 2        | 1         | 1.2e+02      | 2        | K.KIIIKEDTSLPKPVR.I                                                   |
| <a href="#">10182</a> | 687.1332        | 2058.3777        | 2056.0881        | 2.2896         | 0        | 3         | 69           | 4        | R.YVNVSIQTQLLYLFDIQ.- <a href="#">10173</a>                           |
| <a href="#">10850</a> | 716.2495        | 2145.7267        | 2147.0603        | -1.3335        | 0        | 5         | 44           | 2        | R.VTESVDVLMPGVGEIVGGSMR.M <a href="#">10853</a> <a href="#">10886</a> |
| <a href="#">12103</a> | <b>774.3475</b> | <b>2320.0207</b> | <b>2319.1563</b> | <b>0.8644</b>  | <b>1</b> | <b>3</b>  | <b>65</b>    | <b>8</b> | <b>R.RVTESVDVLMPGVGEIVGGSMR.M</b>                                     |
| <a href="#">12326</a> | <b>786.7389</b> | <b>2357.1947</b> | <b>2355.2661</b> | <b>1.9287</b>  | <b>1</b> | <b>36</b> | <b>0.029</b> | <b>1</b> | <b>R.KMTDIINQPIFLTHFPAEIK.A</b> <a href="#">12323</a>                 |
| <a href="#">12426</a> | 792.3479        | 2374.0217        | 2371.2610        | 2.7608         | 1        | (2)       | 76           | 5        | R.KMTDIINQPIFLTHFPAEIK.A                                              |
| <a href="#">14574</a> | <b>901.8699</b> | <b>2702.5877</b> | <b>2704.2352</b> | <b>-1.6474</b> | <b>1</b> | <b>3</b>  | <b>60</b>    | <b>1</b> | <b>M.TTIYIDEDVGRDDSTATGTESAPYK.T</b>                                  |
| <a href="#">14797</a> | 918.2689        | 2751.7847        | 2750.3441        | 1.4406         | 1        | 4         | 41           | 5        | K.AYDIMTLTLGTSMIHGEMRAVPPK.Q                                          |
| <a href="#">16155</a> | 1112.8392       | 3335.4957        | 3332.7149        | 2.7808         | 2        | 3         | 39           | 4        | R.LRSQKDVVFITLTDGYGYLQCILTGMVK.A                                      |

413. [gi|220688822|gb|EED45174.1|](#) Mass: 866113 Score: 42 Queries matched: 118 emPAI: 0.00

nonribosomal peptide synthase, putative [Aspergillus flavus NRRL3357]

| Query               | Observed        | Mr(expt)        | Mr(calc)        | Delta          | Miss     | Score     | Expect         | Rank     | Peptide                              |
|---------------------|-----------------|-----------------|-----------------|----------------|----------|-----------|----------------|----------|--------------------------------------|
| <a href="#">31</a>  | <b>656.3770</b> | <b>655.3697</b> | <b>655.4381</b> | <b>-0.0683</b> | <b>0</b> | <b>22</b> | <b>0.64</b>    | <b>1</b> | <b>R.LLAALR.Q</b> <a href="#">32</a> |
| <a href="#">127</a> | 737.5570        | 736.5497        | 737.4072        | -0.8575        | 0        | 3         | 80             | 4        | K.SYITVR.Y                           |
| <a href="#">306</a> | <b>832.6880</b> | <b>831.6807</b> | <b>832.3974</b> | <b>-0.7166</b> | <b>1</b> | <b>3</b>  | <b>1.1e+02</b> | <b>9</b> | <b>R.MGPNSRR.Q</b>                   |
| <a href="#">331</a> | 423.0331        | 844.0517        | 842.4069        | 1.6448         | 0        | 9         | 24             | 2        | K.GVMVEHR.N                          |
| <a href="#">360</a> | 428.7006        | 855.3867        | 855.4926        | -0.1059        | 0        | 11        | 11             | 10       | R.LQQALQR.L                          |
| <a href="#">406</a> | <b>865.7240</b> | <b>864.7167</b> | <b>863.4687</b> | <b>1.2480</b>  | <b>0</b> | <b>2</b>  | <b>1.1e+02</b> | <b>5</b> | <b>R.NLLAFMR.H</b>                   |
| <a href="#">450</a> | 441.7731        | 881.5317        | 880.5746        | 0.9571         | 0        | 6         | 30             | 10       | R.VVLVPVQK.L <a href="#">449</a>     |
| <a href="#">480</a> | 894.6300        | 893.6227        | 893.4607        | 0.1621         | 0        | 4         | 56             | 2        | K.ALSDVYAR.H                         |



|                      |                  |                  |                  |                |          |            |                |           |                              |                                                                |
|----------------------|------------------|------------------|------------------|----------------|----------|------------|----------------|-----------|------------------------------|----------------------------------------------------------------|
| <a href="#">489</a>  | 898.6200         | 897.6127         | 898.4508         | -0.8381        | 0        | 13         | 8.2            | 8         | K.TQHSALDK.V                 | <a href="#">487</a>                                            |
| <a href="#">526</a>  | 454.6286         | 907.2427         | 904.4614         | 2.7813         | 1        | 6          | 43             | 7         | R.TASDKLDR.K                 |                                                                |
| <a href="#">879</a>  | 500.5621         | 999.1097         | 998.5873         | 0.5225         | 0        | 14         | 6.2            | 6         | K.VQVTAARIA.A                | <a href="#">877</a> <a href="#">880</a>                        |
| <a href="#">916</a>  | <b>504.0046</b>  | <b>1005.9947</b> | <b>1007.5447</b> | <b>-1.5500</b> | <b>1</b> | <b>5</b>   | <b>59</b>      | <b>8</b>  | <b>K.GLRHCLPR.D</b>          |                                                                |
| <a href="#">989</a>  | 515.4361         | 1028.8577        | 1028.5727        | 0.2850         | 2        | 7          | 38             | 9         | R.RDDQVKIR.G                 | <a href="#">987</a>                                            |
| <a href="#">1114</a> | 527.5971         | 1053.1797        | 1052.5363        | 0.6434         | 0        | (8)        | 24             | 5         | R.IVHAADGSGAR.L              | <a href="#">1109</a> <a href="#">1117</a>                      |
| <a href="#">1120</a> | 528.1866         | 1054.3587        | 1053.7022        | 0.6565         | 1        | 4          | 58             | 8         | R.AIRLLSLLR.K                |                                                                |
| <a href="#">1494</a> | 562.4756         | 1122.9367        | 1122.6033        | 0.3334         | 1        | 6          | 41             | 8         | R.EQKSYITVR.Y                |                                                                |
| <a href="#">1505</a> | <b>1125.6280</b> | <b>1124.6207</b> | <b>1124.7393</b> | <b>-0.1186</b> | <b>1</b> | <b>9</b>   | <b>19</b>      | <b>6</b>  | <b>R.AISLLALLRR.N</b>        |                                                                |
| <a href="#">1532</a> | 565.3721         | 1128.7297        | 1127.6775        | 1.0522         | 2        | 6          | 50             | 9         | R.ITGLDIRRGGK.V              |                                                                |
| <a href="#">1946</a> | 606.3316         | 1210.6487        | 1210.8125        | -0.1638        | 2        | 5          | 45             | 9         | R.LLSLLRKAGLK.L              |                                                                |
| <a href="#">2042</a> | 614.1741         | 1226.3337        | 1225.7255        | 0.6082         | 2        | 42         | 0.0098         | 2         | R.ADGQIKLRGLR.V              |                                                                |
| <a href="#">2569</a> | 645.8406         | 1289.6667        | 1288.5717        | 1.0950         | 1        | 5          | 55             | 4         | K.VKDHTEMEER.V               |                                                                |
| <a href="#">3146</a> | <b>452.1029</b>  | <b>1353.2867</b> | <b>1354.8258</b> | <b>-1.5391</b> | <b>0</b> | <b>(5)</b> | <b>44</b>      | <b>5</b>  | <b>R.GVDMVIAILAILK.A</b>     |                                                                |
| <a href="#">3175</a> | 679.1996         | 1356.3847        | 1355.6834        | 0.7014         | 0        | 5          | 50             | 5         | R.SFLSDPHIVGER.M             | <a href="#">3174</a>                                           |
| <a href="#">3270</a> | 683.1791         | 1364.3437        | 1362.6337        | 1.7101         | 0        | (7)        | 32             | 9         | R.AMLGDGEAETLEK.L            | <a href="#">3256</a> <a href="#">3272</a> <a href="#">3275</a> |
| <a href="#">3324</a> | <b>686.0786</b>  | <b>1370.1427</b> | <b>1370.8207</b> | <b>-0.6780</b> | <b>0</b> | <b>6</b>   | <b>39</b>      | <b>1</b>  | <b>R.GVDMVIAILAILK.A</b>     | <a href="#">3360</a> <a href="#">3367</a>                      |
| <a href="#">3365</a> | 687.6706         | 1373.3267        | 1371.5951        | 1.7316         | 0        | 2          | 1.1e+02        | 8         | K.MLASMPYWADR.T              | <a href="#">3342</a>                                           |
| <a href="#">3434</a> | <b>691.1161</b>  | <b>1380.2177</b> | <b>1378.6286</b> | <b>1.5891</b>  | <b>0</b> | <b>8</b>   | <b>25</b>      | <b>2</b>  | <b>R.AMLGDGEAETLEK.L</b>     | <a href="#">3424</a>                                           |
| <a href="#">3481</a> | <b>694.4091</b>  | <b>1386.8037</b> | <b>1388.7048</b> | <b>-1.9011</b> | <b>0</b> | <b>2</b>   | <b>1.1e+02</b> | <b>6</b>  | <b>R.SHPDSIAIVHEGK.E</b>     |                                                                |
| <a href="#">3735</a> | 709.7236         | 1417.4327        | 1418.7877        | -1.3550        | 0        | 4          | 65             | 9         | K.GLDMIVTMLAVLK.A            |                                                                |
| <a href="#">3889</a> | 719.1501         | 1436.2857        | 1434.7826        | 1.5031         | 0        | (3)        | 85             | 8         | K.GLDMIVTMLAVLK.A            |                                                                |
| <a href="#">3940</a> | 721.5381         | 1441.0617        | 1440.7937        | 0.2681         | 0        | 4          | 61             | 5         | K.GVVGELVVTGDGLAR.G          |                                                                |
| <a href="#">4061</a> | <b>485.5645</b>  | <b>1453.6717</b> | <b>1452.8300</b> | <b>0.8417</b>  | <b>1</b> | <b>12</b>  | <b>11</b>      | <b>1</b>  | <b>R.LLDKPLPRTASDK.L</b>     | <a href="#">4055</a>                                           |
| <a href="#">4265</a> | <b>739.4721</b>  | <b>1476.9297</b> | <b>1475.8282</b> | <b>1.1015</b>  | <b>0</b> | <b>3</b>   | <b>84</b>      | <b>8</b>  | <b>R.HPLQIGIAQCLVK.R</b>     |                                                                |
| <a href="#">4615</a> | 761.0221         | 1520.0297        | 1518.8518        | 1.1779         | 0        | 4          | 58             | 5         | K.DQQVLGPVLAPQVR.N           |                                                                |
| <a href="#">5225</a> | <b>790.8886</b>  | <b>1579.7627</b> | <b>1579.8511</b> | <b>-0.0884</b> | <b>1</b> | <b>2</b>   | <b>86</b>      | <b>1</b>  | <b>R.IPFSTYVRFVHSK.L</b>     |                                                                |
| <a href="#">5302</a> | <b>794.0536</b>  | <b>1586.0927</b> | <b>1583.7548</b> | <b>2.3379</b>  | <b>1</b> | <b>1</b>   | <b>1.1e+02</b> | <b>1</b>  | <b>R.SICRTLDMFSAGAR.D</b>    |                                                                |
| <a href="#">5525</a> | <b>803.3636</b>  | <b>1604.7127</b> | <b>1603.7856</b> | <b>0.9272</b>  | <b>0</b> | <b>4</b>   | <b>59</b>      | <b>10</b> | <b>R.DGENVQVVHPFAHR.Q</b>    |                                                                |
| <a href="#">5555</a> | 804.6766         | 1607.3387        | 1604.9436        | 2.3951         | 1        | (3)        | 82             | 2         | R.LLRLALGMTISVFR.N           | <a href="#">5558</a>                                           |
| <a href="#">6138</a> | 551.7049         | 1652.0927        | 1651.8392        | 0.2535         | 0        | 7          | 32             | 2         | K.SEIMPLVFNYQGVR.H           |                                                                |
| <a href="#">6391</a> | 836.5536         | 1671.0927        | 1669.8464        | 1.2463         | 0        | 13         | 7.1            | 2         | K.AGAAFVPLEPGYPPER.L         |                                                                |
| <a href="#">6644</a> | <b>844.7841</b>  | <b>1687.5537</b> | <b>1686.7962</b> | <b>0.7576</b>  | <b>0</b> | <b>8</b>   | <b>23</b>      | <b>2</b>  | <b>R.SSNDPQHNFVSQK.S</b>     | <a href="#">6631</a> <a href="#">6648</a>                      |
| <a href="#">7050</a> | 862.3331         | 1722.6517        | 1723.7909        | -1.1392        | 0        | 1          | 1.1e+02        | 9         | R.VTSLLCNPDYGNPMK.Q          |                                                                |
| <a href="#">7083</a> | <b>576.1865</b>  | <b>1725.5377</b> | <b>1724.8846</b> | <b>0.6531</b>  | <b>0</b> | <b>2</b>   | <b>94</b>      | <b>8</b>  | <b>R.LPDNGIQGWETIVQR.V</b>   |                                                                |
| <a href="#">7362</a> | 586.4289         | 1756.2647        | 1753.8958        | 2.3689         | 1        | 4          | 58             | 4         | K.TQEITQRLPESPAER.L          |                                                                |
| <a href="#">7855</a> | <b>600.4769</b>  | <b>1798.4087</b> | <b>1795.8080</b> | <b>2.6007</b>  | <b>1</b> | <b>6</b>   | <b>38</b>      | <b>6</b>  | <b>R.MREENGQDVENTVVK.S</b>   |                                                                |
| <a href="#">7887</a> | <b>901.8646</b>  | <b>1801.7147</b> | <b>1800.9217</b> | <b>0.7930</b>  | <b>1</b> | <b>0</b>   | <b>1.3e+02</b> | <b>4</b>  | <b>R.IIKQEPVATESESSAGR.V</b> |                                                                |
| <a href="#">8117</a> | <b>609.2715</b>  | <b>1824.7927</b> | <b>1821.8832</b> | <b>2.9095</b>  | <b>1</b> | <b>1</b>   | <b>1.1e+02</b> | <b>3</b>  | <b>R.SFLSDPHIVGERMYR.S</b>   |                                                                |
| <a href="#">8123</a> | <b>609.5259</b>  | <b>1825.5557</b> | <b>1824.9595</b> | <b>0.5962</b>  | <b>1</b> | <b>9</b>   | <b>16</b>      | <b>3</b>  | <b>K.NEGRFVHVIGQDTRV.A</b>   | <a href="#">8130</a>                                           |
| <a href="#">8173</a> | 916.7461         | 1831.4777        | 1830.9060        | 0.5717         | 2        | 1          | 1.1e+02        | 10        | R.GAFDAIFHRMGPNRR.Q          |                                                                |

|                       |                  |                  |                  |                |          |          |           |          |                                                                        |
|-----------------------|------------------|------------------|------------------|----------------|----------|----------|-----------|----------|------------------------------------------------------------------------|
| <a href="#">8213</a>  | 613.1825         | 1836.5257        | 1834.7978        | 1.7279         | 0        | 6        | 35        | 2        | R.VECSHGEIFEPAMTGR.V <a href="#">8202</a>                              |
| <a href="#">8543</a>  | 625.1762         | 1872.5067        | 1872.9442        | -0.4375        | 1        | 4        | 52        | 2        | R.QEARSHPDIAIVHEGK.E                                                   |
| <a href="#">8739</a>  | 631.6139         | 1891.8197        | 1891.9688        | -0.1491        | 0        | 1        | 1.1e+02   | 8        | R.SIGWFTAIIPMILDCR.C                                                   |
| <a href="#">8753</a>  | 632.1665         | 1893.4777        | 1891.9799        | 1.4978         | 1        | 5        | 40        | 4        | K.GNMHNLAGARGVTPAAISR.A                                                |
| <a href="#">8763</a>  | 632.5625         | 1894.6657        | 1892.9891        | 1.6767         | 2        | 4        | 48        | 2        | R.LTQDKMIVRQSFQGR.L                                                    |
| <a href="#">8877</a>  | 636.2072         | 1905.5997        | 1904.0078        | 1.5920         | 1        | 10       | 14        | 3        | R.FVPIEVMPLTTSQKVD.R                                                   |
| <a href="#">8929</a>  | 638.3585         | 1912.0537        | 1910.0122        | 2.0415         | 2        | 2        | 83        | 9        | K.TQHSALDKVKYHNTLR.D                                                   |
| <a href="#">9317</a>  | 654.6449         | 1960.9127        | 1960.9775        | -0.0648        | 1        | 2        | 87        | 9        | R.AMLGDGEAETLEKLQAASK.Q                                                |
| <a href="#">9445</a>  | 989.6771         | 1977.3397        | 1977.0320        | 0.3078         | 0        | 6        | 31        | 2        | K.SAYFATITVHLGDSLNL.R                                                  |
| <a href="#">10130</a> | 685.1322         | 2052.3747        | 2050.0769        | 2.2978         | 1        | 1        | 96        | 10       | R.LLEMTGKGSFSTVIVDTR.C                                                 |
| <a href="#">10190</a> | 687.2395         | 2058.6967        | 2060.1089        | -1.4121        | 2        | 6        | 34        | 6        | R.FVPIEVMPLTTSQKVD.R                                                   |
| <a href="#">10223</a> | <b>688.2309</b>  | <b>2061.6707</b> | <b>2058.9615</b> | <b>2.7092</b>  | <b>1</b> | <b>8</b> | <b>19</b> | <b>1</b> | <b>K.VHGDGMIEWVGRMDSQVK.L <a href="#">10218</a></b>                    |
| <a href="#">10240</a> | 688.6722         | 2062.9947        | 2062.1112        | 0.8835         | 1        | 5        | 46        | 3        | R.LHLKIHHALYDEAFLSR.I                                                  |
| <a href="#">10493</a> | 1049.3686        | 2096.7227        | 2095.0810        | 1.6417         | 1        | 3        | 63        | 6        | R.RNNFQLNLTDLGSFSTIR.S                                                 |
| <a href="#">10497</a> | 700.1855         | 2097.5347        | 2099.0899        | -1.5552        | 0        | 3        | 67        | 3        | K.TVSTPATPNAALPSYPSLQK.A                                               |
| <a href="#">10952</a> | 721.0995         | 2160.2767        | 2159.0429        | 1.2338         | 1        | 1        | 1.1e+02   | 7        | R.YRSIACNEVVPQVPEDQR.I                                                 |
| <a href="#">11453</a> | 743.7645         | 2228.2717        | 2227.2185        | 1.0532         | 2        | 6        | 31        | 4        | R.ANITPNVAFSRLGGDSIRAIR.L                                              |
| <a href="#">11857</a> | 763.5942         | 2287.7607        | 2286.2664        | 1.4944         | 1        | 1        | 1e+02     | 6        | R.NDLPFILEILPPKEGVFFAK.I <a href="#">11856</a>                         |
| <a href="#">11973</a> | 769.1149         | 2304.3227        | 2303.1501        | 1.1726         | 1        | 3        | 58        | 3        | R.DLLTPMTLGDVARAMSPSSTPK.K <a href="#">11974</a> <a href="#">11978</a> |
| <a href="#">12125</a> | 1162.8326        | 2323.6507        | 2322.1968        | 1.4539         | 0        | 1        | 1e+02     | 6        | R.ETTQNPLVQTVFAVHPQTQK.E                                               |
| <a href="#">12142</a> | 776.2859         | 2325.8357        | 2323.2610        | 2.5747         | 0        | 2        | 88        | 10       | R.SALGFHGHIPVSLILTDVPTVCK.A                                            |
| <a href="#">12148</a> | 776.5552         | 2326.6437        | 2325.0067        | 1.6370         | 0        | 1        | 95        | 6        | K.VDDTMTPTETSSITHAFDDTAR.N                                             |
| <a href="#">12456</a> | 793.6842         | 2378.0307        | 2375.1519        | 2.8788         | 1        | 2        | 68        | 4        | R.TTFEHRDGENVQVHPFAHR.Q                                                |
| <a href="#">13145</a> | 825.6602         | 2473.9587        | 2475.2679        | -1.3092        | 1        | 2        | 76        | 2        | K.TMKTVSTPATPNAALPSYPSLQK.A                                            |
| <a href="#">13171</a> | 826.6635         | 2476.9687        | 2476.1872        | 0.7815         | 1        | 1        | 1e+02     | 8        | R.QEGMNCSLRDLTPMTLGDVAR.A                                              |
| <a href="#">13230</a> | <b>829.1572</b>  | <b>2484.4497</b> | <b>2486.2046</b> | <b>-1.7549</b> | <b>2</b> | <b>5</b> | <b>37</b> | <b>1</b> | <b>R.DIAKVHGDGMIEWVGRMDSQVK.L</b>                                      |
| <a href="#">13243</a> | 829.7079         | 2486.1017        | 2487.1774        | -1.0757        | 1        | 7        | 23        | 2        | K.DPVPPSLCKTFLQEEVEPSCR.N <a href="#">13258</a> <a href="#">13264</a>  |
| <a href="#">13374</a> | <b>835.8759</b>  | <b>2504.6057</b> | <b>2503.2972</b> | <b>1.3085</b>  | <b>0</b> | <b>1</b> | <b>95</b> | <b>1</b> | <b>K.EEQSTPFDLQVHPGWRPLVLR.Q</b>                                       |
| <a href="#">13628</a> | 845.7562         | 2534.2467        | 2535.3492        | -1.1025        | 2        | 1        | 96        | 7        | R.SLIWKGNMHNLAGARGVTPAAISR.A <a href="#">13644</a>                     |
| <a href="#">13808</a> | 855.3872         | 2563.1397        | 2564.3383        | -1.1985        | 1        | 9        | 14        | 2        | R.LPSYMVPSRFVPIEVMPLTTSQK.V                                            |
| <a href="#">13830</a> | 856.7945         | 2567.3617        | 2566.3114        | 1.0503         | 2        | 17       | 2.4       | 2        | R.WSTANARKSEIMPLVFNYQGVR.H                                             |
| <a href="#">14014</a> | <b>870.8829</b>  | <b>2609.6267</b> | <b>2607.2526</b> | <b>2.3741</b>  | <b>1</b> | <b>2</b> | <b>77</b> | <b>1</b> | <b>K.IAVQYELSQFMTYGELDRESTK.L</b>                                      |
| <a href="#">14231</a> | 884.6262         | 2650.8567        | 2651.4072        | -0.5504        | 2        | 4        | 43        | 4        | R.IPFSTYVRFVHSHKLGTAPOSTAGK.F                                          |
| <a href="#">15548</a> | 1014.9309        | 3041.7707        | 3042.6134        | -0.8427        | 2        | 1        | 92        | 2        | R.DQKDQPLVPICFDKSVDMMVAIVAVLK.A                                        |
| <a href="#">15799</a> | 1049.7552        | 3146.2437        | 3143.6359        | 2.6079         | 1        | 0        | 92        | 8        | K.GLDMIVTMLAVLKAGAAYIPLDISHSEQR.L                                      |
| <a href="#">15824</a> | <b>1055.4969</b> | <b>3163.4687</b> | <b>3164.6466</b> | <b>-1.1779</b> | <b>2</b> | <b>3</b> | <b>47</b> | <b>1</b> | <b>K.KSTEDATDIDAHTGPVALGPIAGRYAGIQLK.Y</b>                             |
| <a href="#">15939</a> | <b>1074.8202</b> | <b>3221.4387</b> | <b>3218.4696</b> | <b>2.9692</b>  | <b>1</b> | <b>3</b> | <b>45</b> | <b>1</b> | <b>K.GVMVNHANLVSFMRSATNETYMSWTANR.L</b>                                |
| <a href="#">16241</a> | 1127.6335        | 3379.8787        | 3381.7564        | -1.8777        | 1        | 4        | 38        | 2        | R.MPVAAAYTFDVSMDLLISLAIGARVALVDSEK.M <a href="#">16246</a>             |
| <a href="#">16333</a> | <b>1148.1605</b> | <b>3441.4597</b> | <b>3438.6303</b> | <b>2.8294</b>  | <b>0</b> | <b>1</b> | <b>64</b> | <b>1</b> | <b>K.WSQPVDSRPSDSYPCIHDLITGWAAQVPEK.V</b>                              |

414. [gi|45477402|gb|AAS66025.1|](#) Mass: 56033 Score: 42 Queries matched: 13 emPAI: 0.06

hypothetical protein [Aspergillus parasiticus]

| Query                 | Observed        | Mr(expt)         | Mr(calc)         | Delta         | Miss     | Score     | Expect        | Rank     | Peptide                                               |
|-----------------------|-----------------|------------------|------------------|---------------|----------|-----------|---------------|----------|-------------------------------------------------------|
| <a href="#">121</a>   | 733.1260        | 732.1187         | 731.4177         | 0.7010        | 1        | 11        | 17            | 3        | R.QTEKVK.Q                                            |
| <a href="#">3675</a>  | 471.0512        | 1410.1317        | 1407.7068        | 2.4249        | 0        | 5         | 47            | 9        | R.SDLITYAALGCPK.L                                     |
| <a href="#">4030</a>  | 1450.6890       | 1449.6817        | 1449.7616        | -0.0799       | 1        | 5         | 51            | 6        | K.LYPDRITGYQPK.Q <a href="#">4031</a>                 |
| <a href="#">5563</a>  | 805.2696        | 1608.5247        | 1605.8297        | 2.6950        | 1        | 2         | 99            | 8        | -.MGSHAPAVAGKPDPKK.G                                  |
| <a href="#">6989</a>  | 858.7501        | 1715.4857        | 1716.8617        | -1.3760       | 2        | 1         | 1.1e+02       | 3        | R.MSDPNWVRQTEKVK.Q                                    |
| <a href="#">7732</a>  | <b>893.8816</b> | <b>1785.7487</b> | <b>1782.9312</b> | <b>2.8176</b> | <b>1</b> | <b>3</b>  | <b>78</b>     | <b>1</b> | <b>R.GQHSQVSAIMLRWVR.W</b>                            |
| <a href="#">11118</a> | 729.1789        | 2184.5147        | 2184.1109        | 0.4038        | 1        | 2         | 78            | 5        | R.KTAEILQASAYICGAAQHPR.K                              |
| <a href="#">12042</a> | 771.6852        | 2312.0337        | 2311.2001        | 0.8336        | 2        | 2         | 83            | 4        | K.VKQMSAQGRGQHSQVSAIMLR.W                             |
| <a href="#">12571</a> | <b>799.1472</b> | <b>2394.4197</b> | <b>2393.2015</b> | <b>1.2182</b> | <b>0</b> | <b>44</b> | <b>0.0054</b> | <b>1</b> | <b>K.ELIPHLSYFQVEPTEHDLAR.K</b> <a href="#">12572</a> |
| <a href="#">12956</a> | 817.2935        | 2448.8587        | 2447.3020        | 1.5567        | 1        | 9         | 15            | 3        | R.LDPVVATAVGPEDGNNRIADALLK.R <a href="#">12952</a>    |

415. [gi|220697554|gb|EED53895.1|](#) Mass: 43388 Score: 42 Queries matched: 14 emPAI: 0.08

diphosphomevalonate decarboxylase [Aspergillus flavus NRRL3357]

| Query                 | Observed         | Mr(expt)         | Mr(calc)         | Delta         | Miss     | Score     | Expect        | Rank     | Peptide                                           |
|-----------------------|------------------|------------------|------------------|---------------|----------|-----------|---------------|----------|---------------------------------------------------|
| <a href="#">1886</a>  | <b>599.6486</b>  | <b>1197.2827</b> | <b>1196.5496</b> | <b>0.7331</b> | <b>0</b> | <b>10</b> | <b>16</b>     | <b>1</b> | <b>-.MAAPSDSTVFR.A</b> <a href="#">1879</a>       |
| <a href="#">2643</a>  | <b>649.7981</b>  | <b>1297.5817</b> | <b>1296.6172</b> | <b>0.9645</b> | <b>0</b> | <b>27</b> | <b>0.3</b>    | <b>1</b> | <b>R.DFPAPFAEITMR.D</b> <a href="#">2652</a>      |
| <a href="#">3564</a>  | 698.6566         | 1395.2987        | 1394.7188        | 0.5800        | 1        | 5         | 50            | 4        | R.SLRTLTTASCSAK.Y                                 |
| <a href="#">6402</a>  | <b>836.9341</b>  | <b>1671.8537</b> | <b>1670.8587</b> | <b>0.9950</b> | <b>1</b> | <b>3</b>  | <b>72</b>     | <b>7</b> | <b>R.SLRQELEAADSSLPR.L</b> <a href="#">6391</a>   |
| <a href="#">9983</a>  | <b>1019.7236</b> | <b>2037.4327</b> | <b>2035.9891</b> | <b>1.4436</b> | <b>0</b> | <b>30</b> | <b>0.14</b>   | <b>1</b> | <b>K.AILGASSEGWDPFYEPK.S</b> <a href="#">9939</a> |
| <a href="#">12430</a> | 1188.2586        | 2374.5027        | 2372.2659        | 2.2368        | 1        | 1         | 93            | 3        | R.DATLNLPTNSSLSVTLQRSLR.T <a href="#">12433</a>   |
| <a href="#">12866</a> | <b>812.7409</b>  | <b>2435.2007</b> | <b>2433.2652</b> | <b>1.9355</b> | <b>0</b> | <b>42</b> | <b>0.0086</b> | <b>1</b> | <b>R.IVSENNFPTAAGLASSAAGFAALVR.A</b>              |
| <a href="#">13317</a> | 833.2532         | 2496.7377        | 2495.2301        | 1.5077        | 1        | 1         | 86            | 4        | R.MAAIETAIQNRDFPAPFAEITMR.D                       |
| <a href="#">14398</a> | 891.5105         | 2671.5097        | 2670.1868        | 1.3230        | 0        | 2         | 65            | 6        | R.AGTLADGSDSLAEVAPESHWP <del>EMR</del> .A         |

416. [gi|220699123|gb|EED55462.1|](#) Mass: 37045 Score: 42 Queries matched: 16 emPAI: 0.19

Ahal domain family [Aspergillus flavus NRRL3357]

| Query                 | Observed         | Mr(expt)         | Mr(calc)         | Delta         | Miss     | Score     | Expect         | Rank     | Peptide                                                                                                                                     |
|-----------------------|------------------|------------------|------------------|---------------|----------|-----------|----------------|----------|---------------------------------------------------------------------------------------------------------------------------------------------|
| <a href="#">3593</a>  | 467.3049         | 1398.8927        | 1400.7161        | -1.8233       | 1        | 10        | 14             | 2        | R.GAPRQFEGAQVGGK.F                                                                                                                          |
| <a href="#">5050</a>  | <b>781.6581</b>  | <b>1561.3017</b> | <b>1560.7460</b> | <b>0.5557</b> | <b>0</b> | <b>32</b> | <b>0.11</b>    | <b>1</b> | <b>K.FAIFDGNVTGEYTK.L</b> <a href="#">5058</a>                                                                                              |
| <a href="#">5752</a>  | 541.8365         | 1622.4877        | 1621.8312        | 0.6566        | 0        | 3         | 79             | 8        | K.VAVNTTIVIASDEFRT.T <a href="#">5761</a>                                                                                                   |
| <a href="#">7731</a>  | <b>893.8351</b>  | <b>1785.6557</b> | <b>1784.8217</b> | <b>0.8340</b> | <b>0</b> | <b>32</b> | <b>0.09</b>    | <b>1</b> | <b>R.TTAEELYNTFTDPQR.I</b>                                                                                                                  |
| <a href="#">10225</a> | 1031.9156        | 2061.8167        | 2061.0524        | 0.7643        | 2        | 11        | 9.4            | 2        | K.ISNLLSMDGDVDVSRKGV.V <a href="#">10231</a> <a href="#">10234</a> <a href="#">10241</a>                                                    |
| <a href="#">10589</a> | <b>1056.3421</b> | <b>2110.6697</b> | <b>2109.1721</b> | <b>1.4976</b> | <b>2</b> | <b>1</b>  | <b>1.1e+02</b> | <b>2</b> | <b>K.VITLFDVKVQLEYEGKTK.D</b> <a href="#">10577</a> <a href="#">10582</a> <a href="#">10585</a> <a href="#">10587</a> <a href="#">10592</a> |

417. [gi|220689776|gb|EED46126.1|](#) Mass: 67150 Score: 41 Queries matched: 13 emPAI: 0.05

Glycosyl hydrolases family 32 superfamily [Aspergillus flavus NRRL3357]

| Query                 | Observed        | Mr(expt)         | Mr(calc)         | Delta          | Miss     | Score    | Expect    | Rank     | Peptide                                    |
|-----------------------|-----------------|------------------|------------------|----------------|----------|----------|-----------|----------|--------------------------------------------|
| <a href="#">378</a>   | 858.6040        | 857.5967         | 857.4971         | 0.0997         | 0        | 18       | 2.9       | 5        | K.TLGIDIAR.E <a href="#">372</a>           |
| <a href="#">2152</a>  | 622.7311        | 1243.4477        | 1243.6884        | -0.2407        | 1        | 2        | 99        | 10       | K.TLGIDIARETR.E                            |
| <a href="#">2940</a>  | 666.4426        | 1330.8707        | 1329.6888        | 1.1819         | 0        | 41       | 0.013     | 2        | K.TISNVVDNELAR.E <a href="#">2942</a>      |
| <a href="#">4566</a>  | 759.1931        | 1516.3717        | 1514.7670        | 1.6047         | 1        | 12       | 11        | 2        | R.FALSTWARSWYK.N <a href="#">4567</a>      |
| <a href="#">9222</a>  | 650.6139        | 1948.8197        | 1950.0534        | -1.2337        | 1        | 5        | 49        | 4        | R.ELHIKTISNVVDNELAR.E <a href="#">9216</a> |
| <a href="#">10187</a> | 1030.3321       | 2058.6497        | 2057.0939        | 1.5558         | 2        | (1)      | 98        | 6        | K.TLGIDIARETREALMSGPK.I                    |
| <a href="#">10314</a> | <b>691.6772</b> | <b>2072.0097</b> | <b>2073.0888</b> | <b>-1.0791</b> | <b>2</b> | <b>5</b> | <b>46</b> | <b>4</b> | <b>K.TLGIDIARETREALMSGPK.I</b>             |
| <a href="#">11339</a> | <b>738.3545</b> | <b>2212.0417</b> | <b>2213.0139</b> | <b>-0.9722</b> | <b>0</b> | <b>3</b> | <b>66</b> | <b>7</b> | <b>K.EMSLESWEYLGGLWWQEK.V</b>              |
| <a href="#">15419</a> | <b>995.2149</b> | <b>2982.6227</b> | <b>2982.5087</b> | <b>0.1140</b>  | <b>1</b> | <b>1</b> | <b>84</b> | <b>1</b> | <b>R.DLNPNGSQFITPGGKNDPVAVFDGSVIPK.G</b>   |

418. [gi|220699286|gb|EED55625.1|](#) Mass: 40405 Score: 41 Queries matched: 11 emPAI: 0.08

30S ribosomal protein S7, putative [Aspergillus flavus NRRL3357]

| Query                 | Observed        | Mr(expt)         | Mr(calc)         | Delta          | Miss     | Score     | Expect       | Rank     | Peptide                                            |
|-----------------------|-----------------|------------------|------------------|----------------|----------|-----------|--------------|----------|----------------------------------------------------|
| <a href="#">1106</a>  | 527.0481        | 1052.0817        | 1053.5203        | -1.4386        | 0        | 8         | 26           | 2        | R.SQAELHGQ GK.S                                    |
| <a href="#">1307</a>  | 545.6311        | 1089.2477        | 1088.5614        | 0.6863         | 1        | 9         | 24           | 2        | K.WIIDGSDKR.R                                      |
| <a href="#">4279</a>  | <b>493.8639</b> | <b>1478.5697</b> | <b>1475.8130</b> | <b>2.7568</b>  | <b>2</b> | <b>11</b> | <b>13</b>    | <b>3</b> | <b>K.LLMTDGKLSRAQK.D</b>                           |
| <a href="#">6467</a>  | <b>839.1076</b> | <b>1676.2007</b> | <b>1674.9781</b> | <b>1.2226</b>  | <b>0</b> | <b>41</b> | <b>0.011</b> | <b>1</b> | <b>K.GIAGGGASVQIPVPLALR.Q</b> <a href="#">6445</a> |
| <a href="#">6678</a>  | 564.5975        | 1690.7707        | 1691.8519        | -1.0812        | 1        | 14        | 5.8          | 3        | K.FDPVETLPKTENFR.T <a href="#">6689</a>            |
| <a href="#">7124</a>  | <b>578.0392</b> | <b>1731.0957</b> | <b>1728.9271</b> | <b>2.1686</b>  | <b>1</b> | <b>5</b>  | <b>44</b>    | <b>3</b> | <b>K.FAQRVANELVAVAEGR.S</b>                        |
| <a href="#">10605</a> | 705.2675        | 2112.7807        | 2114.1571        | -1.3764        | 2        | 5         | 37           | 3        | - .MPPRLNLFNARTAVPVFR.Q                            |
| <a href="#">12602</a> | <b>801.1712</b> | <b>2400.4917</b> | <b>2402.2626</b> | <b>-1.7708</b> | <b>1</b> | <b>1</b>  | <b>92</b>    | <b>4</b> | <b>R.QTSINVS RPSIATTINSNRSTR.H</b>                 |
| <a href="#">15704</a> | 1032.7035       | 3095.0887        | 3096.5033        | -1.4146        | 2        | 0         | 89           | 7        | K.CDGT PASPELEQGTPISEILQRDKEAQK.H                  |

419. [gi|220696411|gb|EED52753.1|](#) Mass: 129737 Score: 41 Queries matched: 15 emPAI: 0.03

carbamoyl-phosphate synthase, large subunit [Aspergillus flavus NRRL3357]

| Query                | Observed        | Mr(expt)         | Mr(calc)         | Delta         | Miss     | Score     | Expect         | Rank     | Peptide                                     |
|----------------------|-----------------|------------------|------------------|---------------|----------|-----------|----------------|----------|---------------------------------------------|
| <a href="#">967</a>  | 511.4011        | 1020.7877        | 1021.5080        | -0.7203       | 0        | 9         | 21             | 9        | K.EVEYEVVR.D                                |
| <a href="#">1014</a> | 518.0751        | 1034.1357        | 1033.5597        | 0.5760        | 0        | 3         | 96             | 10       | K.SFGITPWVK.K                               |
| <a href="#">1325</a> | 547.1576        | 1092.3007        | 1090.6022        | 1.6985        | 0        | 8         | 31             | 8        | K.EIGSLFGIQK.E                              |
| <a href="#">1724</a> | <b>583.1751</b> | <b>1164.3357</b> | <b>1161.6546</b> | <b>2.6811</b> | <b>1</b> | <b>1</b>  | <b>1.3e+02</b> | <b>6</b> | <b>R.KSFGITPWVK.K</b>                       |
| <a href="#">1832</a> | <b>594.6091</b> | <b>1187.2037</b> | <b>1184.5673</b> | <b>2.6364</b> | <b>0</b> | <b>9</b>  | <b>23</b>      | <b>1</b> | <b>K.ADQEGAQPELK.V</b> <a href="#">1831</a> |
| <a href="#">1866</a> | <b>597.3821</b> | <b>1192.7497</b> | <b>1191.6724</b> | <b>1.0773</b> | <b>2</b> | <b>2</b>  | <b>95</b>      | <b>6</b> | <b>R.GTFNLAKTRGK.T</b>                      |
| <a href="#">2851</a> | 661.8026        | 1321.5907        | 1321.7282        | -0.1374       | 0        | 4         | 66             | 7        | K.IVEYLQPLGYK.F                             |
| <a href="#">3230</a> | 681.6201        | 1361.2257        | 1360.7238        | 0.5019        | 0        | 1         | 1.3e+02        | 8        | K.ESVSVQVIEFPK.K                            |
| <a href="#">4410</a> | <b>748.6746</b> | <b>1495.3347</b> | <b>1492.8137</b> | <b>2.5210</b> | <b>0</b> | <b>4</b>  | <b>64</b>      | <b>6</b> | <b>R.VPEPGEGILLGGDIK.N</b>                  |
| <a href="#">5114</a> | <b>785.3901</b> | <b>1568.7657</b> | <b>1566.7752</b> | <b>1.9905</b> | <b>0</b> | <b>41</b> | <b>0.012</b>   | <b>1</b> | <b>R.NAVDFGVPLFMETK.T</b>                   |
| <a href="#">6243</a> | <b>554.5125</b> | <b>1660.5157</b> | <b>1658.9355</b> | <b>1.5802</b> | <b>0</b> | <b>8</b>  | <b>27</b>      | <b>2</b> | <b>K.IGLGHTLPEL PNAVTK.T</b>                |
| <a href="#">6647</a> | 844.8351        | 1687.6557        | 1688.8006        | -1.1448       | 0        | 1         | 1.2e+02        | 8        | K.FENLDEVLQNP TDR.R                         |
| <a href="#">7864</a> | <b>900.8486</b> | <b>1799.6827</b> | <b>1798.8989</b> | <b>0.7838</b> | <b>0</b> | <b>15</b> | <b>4.8</b>     | <b>1</b> | <b>K.TTTANFEP SLDYIVTK.I</b>                |

[9844](#) 676.1889 2025.5447 2024.0724 1.4723 2 2 85 9 K.ALVGRDVPEPV DLMTEKR.D

420. [gi|220696354|gb|EED52696.1|](#) Mass: 43567 Score: 41 Queries matched: 11 emPAI: 0.08

mannitol-1-phosphate dehydrogenase [Aspergillus flavus NRRL3357]

| Query                 | Observed        | Mr(expt)         | Mr(calc)         | Delta          | Miss | Score     | Expect       | Rank     | Peptide                                 |
|-----------------------|-----------------|------------------|------------------|----------------|------|-----------|--------------|----------|-----------------------------------------|
| <a href="#">1471</a>  | 560.9171        | 1119.8197        | 1119.5785        | 0.2412         | 1    | 4         | 63           | 4        | R.ARFANSAIDR.I                          |
| <a href="#">1833</a>  | <b>594.6511</b> | <b>1187.2877</b> | <b>1187.6299</b> | <b>-0.3421</b> | 0    | <b>6</b>  | <b>49</b>    | <b>3</b> | <b>R.FIGPASQLAER.G</b>                  |
| <a href="#">4460</a>  | 752.0026        | 1501.9907        | 1503.8158        | -1.8250        | 0    | 3         | 80           | 2        | R.IVPNQPPNSGLNVR.I                      |
| <a href="#">4921</a>  | 775.4846        | 1548.9547        | 1548.8195        | 0.1353         | 2    | 6         | 38           | 3        | -.MGKKAIQFGGNIGR.G <a href="#">4907</a> |
| <a href="#">5495</a>  | 802.2696        | 1602.5247        | 1600.8685        | 1.6562         | 2    | 1         | 1.2e+02      | 10       | R.KERFIGPASQLAER.G                      |
| <a href="#">6483</a>  | 839.8551        | 1677.6957        | 1676.7642        | 0.9315         | 0    | 2         | 90           | 3        | R.FQNVPGDEESSELAR.I                     |
| <a href="#">6709</a>  | <b>847.2866</b> | <b>1692.5587</b> | <b>1691.7850</b> | <b>0.7738</b>  | 0    | <b>41</b> | <b>0.012</b> | <b>1</b> | <b>K.ENSAEDATSQLTGLEK.D</b>             |
| <a href="#">6753</a>  | 566.6849        | 1697.0327        | 1698.8974        | -1.8647        | 2    | 6         | 34           | 7        | R.GKKMIAEALEDPEIR.E                     |
| <a href="#">6998</a>  | 859.2126        | 1716.4107        | 1714.8923        | 1.5184         | 2    | (2)       | 96           | 9        | R.GKKMIAEALEDPEIR.E                     |
| <a href="#">16262</a> | 1131.7849       | 3392.3327        | 3390.6878        | 1.6450         | 2    | 2         | 57           | 7        | R.GQKFDALLGAIEMALRFQNVPGDEESSELAR.I     |

421. [gi|8308154|gb|AAF74497.1|AF261860\\_1](#) Score: 41 Queries matched: 6

O-methyltransferase [Aspergillus flavus]

| Query                 | Observed | Mr(expt)  | Mr(calc)  | Delta  | Miss | Score | Expect  | Rank | Peptide                                       |
|-----------------------|----------|-----------|-----------|--------|------|-------|---------|------|-----------------------------------------------|
| <a href="#">3161</a>  | 678.6131 | 1355.2117 | 1354.7979 | 0.4138 | 2    | 10    | 16      | 2    | -.LIRILRGCAQR.F                               |
| <a href="#">3355</a>  | 687.1441 | 1372.2737 | 1370.7565 | 1.5173 | 2    | 2     | 1.1e+02 | 7    | -.LERILRGCAQR.F                               |
| <a href="#">10289</a> | 690.5172 | 2068.5297 | 2065.9745 | 2.5552 | 0    | 6     | 33      | 4    | R.FIFEEVAPNQYAHTDASK.M <a href="#">10286</a>  |
| <a href="#">11043</a> | 725.0985 | 2172.2737 | 2171.0688 | 1.2050 | 0    | 39    | 0.016   | 5    | K.GNPPTWNVSPFSLAFDPTK.G <a href="#">11051</a> |

422. [gi|220699888|gb|EED56227.1|](#) Mass: 76431 Score: 41 Queries matched: 9 emPAI: 0.04

GTP binding protein, putative [Aspergillus flavus NRRL3357]

| Query                 | Observed        | Mr(expt)         | Mr(calc)         | Delta          | Miss | Score     | Expect         | Rank     | Peptide                                  |
|-----------------------|-----------------|------------------|------------------|----------------|------|-----------|----------------|----------|------------------------------------------|
| <a href="#">89</a>    | <b>707.5200</b> | <b>706.5127</b>  | <b>707.3272</b>  | <b>-0.8145</b> | 0    | <b>41</b> | <b>0.013</b>   | <b>1</b> | <b>K.MDLASR.A</b>                        |
| <a href="#">1416</a>  | 555.6031        | 1109.1917        | 1106.5754        | 2.6164         | 1    | 1         | 1.2e+02        | 9        | K.MDLASRASLK.Q                           |
| <a href="#">1977</a>  | 608.2726        | 1214.5307        | 1213.7394        | 0.7913         | 1    | 11        | 15             | 7        | K.QNLTKVLSALK.L                          |
| <a href="#">6434</a>  | 837.9396        | 1673.8647        | 1674.9086        | -1.0439        | 2    | 12        | 10             | 3        | K.MDLASRASLKQNLTK.V <a href="#">6456</a> |
| <a href="#">10662</a> | 708.6729        | 2122.9967        | 2121.1946        | 1.8021         | 2    | 5         | 39             | 8        | R.LAFVSDLPGSVRYLKSTLR.G                  |
| <a href="#">11764</a> | <b>760.6082</b> | <b>2278.8027</b> | <b>2280.2365</b> | <b>-1.4338</b> | 1    | <b>6</b>  | <b>35</b>      | <b>1</b> | <b>R.TISPSKALPPPALPTNIFDSSK.E</b>        |
| <a href="#">13042</a> | 822.5949        | 2464.7627        | 2465.2550        | -0.4923        | 0    | 1         | 96             | 8        | K.ENHGDELVIGPLLDNALPEHGK.V               |
| <a href="#">13301</a> | <b>832.4589</b> | <b>2494.3547</b> | <b>2494.3292</b> | <b>0.0255</b>  | 0    | <b>0</b>  | <b>1.1e+02</b> | <b>1</b> | <b>K.RPAILPVQSGSSEASLDLHHVGP.K</b>       |

423. [gi|220697813|gb|EED54153.1|](#) Mass: 29814 Score: 41 Queries matched: 8 emPAI: 0.11

pyrroline-5-carboxylate reductase [Aspergillus flavus NRRL3357]

| Query                 | Observed         | Mr(expt)         | Mr(calc)         | Delta         | Miss     | Score     | Expect       | Rank     | Peptide                                  |
|-----------------------|------------------|------------------|------------------|---------------|----------|-----------|--------------|----------|------------------------------------------|
| <a href="#">5365</a>  | 796.6541         | 1591.2937        | 1591.7876        | -0.4938       | 1        | 4         | 59           | 6        | K. <u>MLV</u> ESSDSPSQLRK.N              |
| <a href="#">6448</a>  | 559.3345         | 1674.9817        | 1674.8611        | 0.1207        | 0        | 6         | 35           | 3        | K.MAALGVQTTTANVEAAK.D                    |
| <a href="#">8811</a>  | 950.8856         | 1899.7567        | 1898.9275        | 0.8292        | 1        | 14        | 4.9          | 2        | K.QNIWVSEPWDVNREK.M <a href="#">8809</a> |
| <a href="#">9006</a>  | 640.6805         | 1919.0197        | 1918.0346        | 0.9851        | 0        | 2         | 87           | 5        | K.LAFIGGGN <u>M</u> ASAIIGLVNK.G         |
| <a href="#">9670</a>  | <b>1002.7956</b> | <b>2003.5767</b> | <b>2003.0423</b> | <b>0.5345</b> | <b>1</b> | <b>41</b> | <b>0.012</b> | <b>1</b> | <b>K.DVTSEEKELVNAVLGSVSK.A</b>           |
| <a href="#">12967</a> | 818.0709         | 2451.1907        | 2451.4101        | -0.2194       | 0        | 3         | 62           | 6        | R.TTLPVVVSIAGITLDSLQWLR.T                |
| <a href="#">14500</a> | 896.7079         | 2687.1017        | 2687.4316        | -0.3299       | 1        | 1         | 77           | 3        | M.PSLQESKLAFIGGGN <u>M</u> ASAIIGLVNK.G  |

424. [gi|220700182|gb|EED56521.1|](#) Mass: 21709 Score: 40 Queries matched: 2 emPAI: 0.15

DMRL synthase family protein [Aspergillus flavus NRRL3357]

| Query                 | Observed        | Mr(expt)         | Mr(calc)         | Delta         | Miss     | Score     | Expect       | Rank     | Peptide                                   |
|-----------------------|-----------------|------------------|------------------|---------------|----------|-----------|--------------|----------|-------------------------------------------|
| <a href="#">2818</a>  | <b>660.1416</b> | <b>1318.2687</b> | <b>1317.6313</b> | <b>0.6374</b> | <b>0</b> | <b>40</b> | <b>0.015</b> | <b>1</b> | <b>K.GPGATPSFDGSGLR.I</b>                 |
| <a href="#">11230</a> | 732.7339        | 2195.1797        | 2194.9776        | 0.2022        | 0        | 1         | 1e+02        | 5        | K.GETM <u>H</u> FEYIADAVSHGL <u>M</u> R.V |

425. [gi|220697521|gb|EED53862.1|](#) Mass: 11971 Score: 40 Queries matched: 15 emPAI: 0.66

60S ribosomal protein L36 [Aspergillus flavus NRRL3357]

| Query                | Observed        | Mr(expt)         | Mr(calc)         | Delta          | Miss     | Score     | Expect       | Rank     | Peptide                                                                |
|----------------------|-----------------|------------------|------------------|----------------|----------|-----------|--------------|----------|------------------------------------------------------------------------|
| <a href="#">26</a>   | 650.4130        | 649.4057         | 649.3548         | 0.0510         | 0        | 14        | 6.4          | 1        | R.LGTFGR.G                                                             |
| <a href="#">158</a>  | 378.6831        | 755.3517         | 755.4905         | -0.1388        | 0        | 29        | 0.16         | 4        | R.IIELLR.N <a href="#">157</a> <a href="#">159</a> <a href="#">161</a> |
| <a href="#">464</a>  | 886.7790        | 885.7717         | 885.5284         | 0.2434         | 0        | 24        | 0.75         | 1        | R.SGIVVGLNK.G                                                          |
| <a href="#">549</a>  | <b>457.0391</b> | <b>912.0637</b>  | <b>911.5916</b>  | <b>0.4721</b>  | <b>1</b> | <b>37</b> | <b>0.027</b> | <b>1</b> | <b>R.RIEELLR.N</b>                                                     |
| <a href="#">1524</a> | 565.1146        | 1128.2147        | 1127.6299        | 0.5849         | 1        | 8         | 30           | 9        | K.TTPLNTPKTR.V                                                         |
| <a href="#">1558</a> | <b>566.7991</b> | <b>1131.5837</b> | <b>1131.5924</b> | <b>-0.0087</b> | <b>0</b> | <b>34</b> | <b>0.078</b> | <b>1</b> | <b>R.EVVGLAPYER.R</b> <a href="#">1559</a>                             |
| <a href="#">2357</a> | 423.0795        | 1266.2167        | 1263.6796        | 2.5371         | 2        | 11        | 13           | 2        | K.QSSRRATFVR.D <a href="#">2356</a>                                    |
| <a href="#">3307</a> | 685.2321        | 1368.4497        | 1369.7677        | -1.3180        | 1        | 2         | 84           | 4        | M.AQERSGIVVGLNK.G                                                      |
| <a href="#">5336</a> | 530.6525        | 1588.9357        | 1586.8416        | 2.0941         | 1        | 5         | 49           | 5        | R.DIAREVVGLAPYER.R                                                     |
| <a href="#">5352</a> | 795.8921        | 1589.7697        | 1587.8151        | 1.9546         | 2        | 5         | 52           | 2        | K.VEDMQRVIAESRR.V                                                      |

426. [gi|220692396|gb|EED48743.1|](#) Mass: 11176 Score: 40 Queries matched: 4 emPAI: 0.31

mitochondrial F1F0 ATP synthase subunit F (Atp17), putative [Aspergillus flavus NRRL3357]

| Query                 | Observed        | Mr(expt)         | Mr(calc)         | Delta         | Miss     | Score     | Expect       | Rank     | Peptide                                  |
|-----------------------|-----------------|------------------|------------------|---------------|----------|-----------|--------------|----------|------------------------------------------|
| <a href="#">592</a>   | 925.5830        | 924.5757         | 924.5644         | 0.0113        | 0        | 16        | 3.6          | 1        | R.GLSTLIPPK.I                            |
| <a href="#">3438</a>  | <b>691.6771</b> | <b>1381.3397</b> | <b>1380.7725</b> | <b>0.5672</b> | <b>0</b> | <b>40</b> | <b>0.015</b> | <b>1</b> | <b>R.GSAPEVKPTGLIGR.Y</b>                |
| <a href="#">8268</a>  | 615.4535        | 1843.3387        | 1842.9370        | 0.4017        | 2        | 3         | 79           | 3        | K.IASPNAIGA <u>A</u> KDAAR <u>M</u> DR.V |
| <a href="#">12184</a> | 778.1952        | 2331.5637        | 2331.3274        | 0.2363        | 2        | 1         | 91           | 8        | R.GLSTLIPPKIASPNAIGA <u>A</u> KDAAR.M    |

427. [gi|220698230|gb|EED54570.1|](#) Mass: 32404 Score: 40 Queries matched: 16 emPAI: 0.10



conserved hypothetical protein [Aspergillus flavus NRRL3357]

| Query                 | Observed         | Mr(expt)         | Mr(calc)         | Delta          | Miss     | Score      | Expect         | Rank      | Peptide                                                          |
|-----------------------|------------------|------------------|------------------|----------------|----------|------------|----------------|-----------|------------------------------------------------------------------|
| <a href="#">764</a>   | <b>488.6456</b>  | <b>975.2767</b>  | <b>975.5284</b>  | <b>-0.2517</b> | <b>1</b> | <b>2</b>   | <b>1.2e+02</b> | <b>1</b>  | <b>R.GLTRAVGMR.G <a href="#">768</a></b>                         |
| <a href="#">2693</a>  | 652.2886         | 1302.5627        | 1299.7333        | 2.8294         | 0        | (3)        | 90             | 9         | R.GGLSMLGLNGLLR.R                                                |
| <a href="#">2776</a>  | <b>438.9419</b>  | <b>1313.8037</b> | <b>1315.7282</b> | <b>-1.9245</b> | <b>0</b> | <b>40</b>  | <b>0.019</b>   | <b>1</b>  | <b>R.GGLSMLGLNGLLR.R <a href="#">2777</a></b>                    |
| <a href="#">8012</a>  | 605.7592         | 1814.2557        | 1814.0019        | 0.2539         | 1        | 8          |                | 22        | R.AVGMRGGLSMLGLNGLLR.R <a href="#">8016</a> <a href="#">8034</a> |
| <a href="#">9644</a>  | <b>667.7232</b>  | <b>2000.1477</b> | <b>2002.0928</b> | <b>-1.9451</b> | <b>2</b> | <b>3</b>   |                | <b>65</b> | <b>R.AVGMRGGLSMLGLNGLLR.R <a href="#">I</a></b>                  |
| <a href="#">11379</a> | <b>739.6959</b>  | <b>2216.0657</b> | <b>2216.8635</b> | <b>-0.7978</b> | <b>0</b> | <b>(5)</b> |                | <b>35</b> | <b>K.MGSYEAMYGDMAISYVHMR.G</b>                                   |
| <a href="#">11388</a> | 740.2889         | 2217.8447        | 2216.8635        | 0.9812         | 0        | 8          |                | 20        | K.MGSYEAMYGDMAISYVHMR.G <a href="#">11389</a>                    |
| <a href="#">15817</a> | <b>1054.1039</b> | <b>3159.2897</b> | <b>3158.3864</b> | <b>0.9033</b>  | <b>2</b> | <b>(0)</b> |                | <b>90</b> | <b>K.MGSYEAMYGDMAISYVHMRGLTRAVGMR.G</b>                          |
| <a href="#">15819</a> | 1054.3972        | 3160.1697        | 3158.3864        | 1.7833         | 2        | 1          |                | 77        | K.MGSYEAMYGDMAISYVHMRGLTRAVGMR.G                                 |
| <a href="#">16032</a> | 1095.3399        | 3282.9977        | 3282.4817        | 0.5160         | 1        | 10         |                | 11        | R.VNDALIGAIKMGSYEAMYGDMAISYVHMR.G <a href="#">16031</a>          |

428. [gi|220694974|gb|EED51317.1|](#) Mass: 108549 Score: 40 Queries matched: 19 emPAI: 0.03

chromosome segregation protein Cse1, putative [Aspergillus flavus NRRL3357]

| Query                 | Observed        | Mr(expt)         | Mr(calc)         | Delta          | Miss     | Score     | Expect         | Rank      | Peptide                                                  |
|-----------------------|-----------------|------------------|------------------|----------------|----------|-----------|----------------|-----------|----------------------------------------------------------|
| <a href="#">394</a>   | 864.4300        | 863.4227         | 864.4705         | -1.0478        | 0        | 10        |                | 17        | K.YDILVSR.A <a href="#">400</a>                          |
| <a href="#">2488</a>  | 641.0111        | 1280.0077        | 1280.6223        | -0.6146        | 0        | 4         |                | 62        | K.GWGFTCEALLK.L                                          |
| <a href="#">2825</a>  | 660.4796        | 1318.9447        | 1317.6565        | 1.2882         | 0        | 3         |                | 77        | R.WDTLVDDLVSRL.L                                         |
| <a href="#">3640</a>  | 703.1851        | 1404.3557        | 1403.7813        | 0.5745         | 1        | 5         |                | 49        | K.YLYTFRSIIITK.E <a href="#">3642</a>                    |
| <a href="#">6153</a>  | 552.0962        | 1653.2667        | 1654.7629        | -1.4962        | 1        | 2         |                | 96        | K.VQENEFMLKCAMR.V                                        |
| <a href="#">7456</a>  | 589.2249        | 1764.6527        | 1761.9486        | 2.7042         | 2        | 2         |                | 85        | R.LQNSKTENLTGRFVR.F                                      |
| <a href="#">7689</a>  | <b>892.6626</b> | <b>1783.3107</b> | <b>1783.9469</b> | <b>-0.6361</b> | <b>1</b> | <b>3</b>  |                | <b>80</b> | <b>R.WDTLVDDLVSRLQPK.N</b>                               |
| <a href="#">9632</a>  | <b>667.2505</b> | <b>1998.7297</b> | <b>1999.0044</b> | <b>-0.2747</b> | <b>0</b> | <b>2</b>  |                | <b>79</b> | <b>-.MADNLGAVAQLEASLDPR.Q</b>                            |
| <a href="#">11962</a> | <b>768.6212</b> | <b>2302.8417</b> | <b>2302.1157</b> | <b>0.7260</b>  | <b>0</b> | <b>3</b>  |                | <b>69</b> | <b>K.FGNPFLALFEGLDSYLEENK.T</b>                          |
| <a href="#">12348</a> | <b>787.7045</b> | <b>2360.0917</b> | <b>2358.1227</b> | <b>1.9690</b>  | <b>1</b> | <b>4</b>  |                | <b>44</b> | <b>R.NYTDEDGNYKLQLDEVTTIK.Q</b>                          |
| <a href="#">12368</a> | 790.1205        | 2367.3397        | 2369.2009        | -1.8611        | 1        | 2         |                | 78        | -.MADNLGAVAQLEASLDPRQNK.Q <a href="#">12377</a>          |
| <a href="#">12820</a> | <b>810.7802</b> | <b>2429.3187</b> | <b>2429.3655</b> | <b>-0.0468</b> | <b>2</b> | <b>0</b>  | <b>1.1e+02</b> | <b>3</b>  | <b>R.LQPKNPAVNNGLVQVAHSIFKR.W</b>                        |
| <a href="#">13458</a> | 838.8202        | 2513.4387        | 2514.2238        | -0.7851        | 2        | 1         |                | 99        | K.RNYTDEDGNYKLQLDEVTTIK.Q                                |
| <a href="#">13470</a> | 839.6719        | 2515.9937        | 2515.2132        | 0.7805         | 0        | 1         |                | 84        | K.VVLHYTEGHLAQYSDPASNWK.A                                |
| <a href="#">13629</a> | <b>845.8142</b> | <b>2534.4207</b> | <b>2532.3548</b> | <b>2.0660</b>  | <b>0</b> | <b>37</b> | <b>0.023</b>   | <b>1</b>  | <b>K.EGVVPHTDSVLQNLINITEVISR.N <a href="#">13621</a></b> |

429. [gi|220691400|gb|EED47748.1|](#) Mass: 29314 Score: 40 Queries matched: 11 emPAI: 0.24

proteasome component Pre6, putative [Aspergillus flavus NRRL3357]

| Query                | Observed        | Mr(expt)         | Mr(calc)         | Delta          | Miss     | Score     | Expect       | Rank     | Peptide                |
|----------------------|-----------------|------------------|------------------|----------------|----------|-----------|--------------|----------|------------------------|
| <a href="#">627</a>  | 468.7291        | 935.4437         | 933.5032         | 1.9405         | 0        | 3         |              | 87       | K.YIAGVQQR.Y           |
| <a href="#">767</a>  | 976.6210        | 975.6137         | 975.5172         | 0.0966         | 1        | 6         |              | 44       | R.GTCAVGKVKG.D         |
| <a href="#">1639</a> | <b>572.7536</b> | <b>1143.4927</b> | <b>1143.6499</b> | <b>-0.1572</b> | <b>0</b> | <b>42</b> | <b>0.012</b> | <b>1</b> | <b>K.SLLEVVQTGAK.N</b> |
| <a href="#">1907</a> | 1203.2690       | 1202.2617        | 1202.6329        | -0.3712        | 1        | 5         |              | 55       | K.GKDVVVLGCEK.R        |

|                       |                 |                  |                  |               |          |           |            |          |                                                                                                               |
|-----------------------|-----------------|------------------|------------------|---------------|----------|-----------|------------|----------|---------------------------------------------------------------------------------------------------------------|
| <a href="#">4131</a>  | 732.2171        | 1462.4197        | 1462.8103        | -0.3906       | 1        | 5         | 52         | 6        | K.TARTSTTTAAILTR.G                                                                                            |
| <a href="#">5734</a>  | <b>811.5616</b> | <b>1621.1087</b> | <b>1619.8658</b> | <b>1.2429</b> | <b>0</b> | <b>20</b> | <b>1.3</b> | <b>1</b> | <b>R.LTVEDPVTIEYITK.Y</b> <a href="#">5736</a> <a href="#">5743</a> <a href="#">5747</a> <a href="#">5748</a> |
| <a href="#">13761</a> | 852.6762        | 2555.0067        | 2553.2864        | 1.7203        | 0        | 1         | 96         | 7        | R.YTQSGGVRPFGISTLVVGFDPNDK.V                                                                                  |

430. [gi|220697454|gb|EED53795.1|](#) Mass: 57088 Score: 40 Queries matched: 25 emPAI: 0.06

peptide N-myristoyl transferase (Nmt1) [Aspergillus flavus NRRL3357]

| Query                 | Observed        | Mr(expt)         | Mr(calc)         | Delta          | Miss     | Score     | Expect         | Rank     | Peptide                                                                                                 |
|-----------------------|-----------------|------------------|------------------|----------------|----------|-----------|----------------|----------|---------------------------------------------------------------------------------------------------------|
| <a href="#">133</a>   | <b>743.4720</b> | <b>742.4647</b>  | <b>741.3116</b>  | <b>1.1532</b>  | <b>0</b> | <b>9</b>  | <b>23</b>      | <b>1</b> | <b>K.DMASYR.F</b> <a href="#">131</a>                                                                   |
| <a href="#">822</a>   | 987.4330        | 986.4257         | 985.5808         | 0.8449         | 1        | 3         | 99             | 7        | K.LKDATITPK.M                                                                                           |
| <a href="#">889</a>   | 1001.4440       | 1000.4367        | 1000.5665        | -0.1298        | 2        | 5         | 57             | 6        | K.KDAEALRK.M <a href="#">890</a>                                                                        |
| <a href="#">923</a>   | 506.0506        | 1010.0867        | 1010.5760        | -0.4893        | 0        | 16        | 4.2            | 2        | K.LLENNPALK.N <a href="#">925</a>                                                                       |
| <a href="#">1396</a>  | 554.5126        | 1107.0107        | 1105.5437        | 1.4670         | 2        | 6         | 36             | 3        | -.MSDPKDTKGK.A <a href="#">1405</a>                                                                     |
| <a href="#">4486</a>  | 753.2766        | 1504.5387        | 1504.8171        | -0.2784        | 0        | 15        | 5.4            | 3        | K.MTISELLTGLSVGGK.N <a href="#">4487</a> <a href="#">4494</a> <a href="#">4495</a> <a href="#">4497</a> |
| <a href="#">5471</a>  | 534.6422        | 1600.9047        | 1598.9429        | 1.9618         | 1        | 4         | 63             | 9        | R.LLLLLMNDALIQAKK.A                                                                                     |
| <a href="#">7556</a>  | 887.2651        | 1772.5157        | 1769.9974        | 2.5183         | 2        | 4         | 64             | 8        | K.VTEINFLCIHKKLR.S                                                                                      |
| <a href="#">8538</a>  | <b>624.8285</b> | <b>1871.4637</b> | <b>1868.9665</b> | <b>2.4972</b>  | <b>1</b> | <b>2</b>  | <b>91</b>      | <b>4</b> | <b>K.LLENNPALKNELAGMDK.K</b>                                                                            |
| <a href="#">9396</a>  | <b>986.2366</b> | <b>1970.4587</b> | <b>1971.9861</b> | <b>-1.5274</b> | <b>2</b> | <b>0</b>  | <b>1.3e+02</b> | <b>3</b> | <b>K.GKAPQAEDTQAGSSEQK.LK.D</b>                                                                         |
| <a href="#">9446</a>  | <b>660.1419</b> | <b>1977.4037</b> | <b>1978.0306</b> | <b>-0.6269</b> | <b>0</b> | <b>11</b> | <b>11</b>      | <b>1</b> | <b>K.NHLPSTTSTPGLRPMK.D</b>                                                                             |
| <a href="#">9466</a>  | 660.7132        | 1979.1177        | 1980.9305        | -1.8128        | 0        | 4         | 58             | 7        | R.YSQSFLHWALMSPGWR.K                                                                                    |
| <a href="#">11614</a> | <b>752.3335</b> | <b>2253.9787</b> | <b>2253.1470</b> | <b>0.8317</b>  | <b>0</b> | <b>40</b> | <b>0.014</b>   | <b>1</b> | <b>K.ITDFFSFYNLPSTVIQHPK.H</b> <a href="#">11610</a>                                                    |
| <a href="#">12252</a> | 782.4152        | 2344.2237        | 2344.1766        | 0.0471         | 2        | 6         | 34             | 2        | K.MAEKLENNPALKNELAGMDK.K <a href="#">12250</a> <a href="#">12251</a>                                    |

431. [gi|220697382|gb|EED53723.1|](#) Score: 39 Queries matched: 4

conserved hypothetical protein [Aspergillus flavus NRRL3357]

| Query                 | Observed        | Mr(expt)        | Mr(calc)        | Delta         | Miss     | Score     | Expect    | Rank     | Peptide                |
|-----------------------|-----------------|-----------------|-----------------|---------------|----------|-----------|-----------|----------|------------------------|
| <a href="#">76</a>    | <b>691.7500</b> | <b>690.7427</b> | <b>690.3813</b> | <b>0.3614</b> | <b>1</b> | <b>13</b> | <b>11</b> | <b>3</b> | <b>R.RQYPK.Q</b>       |
| <a href="#">853</a>   | 496.9296        | 991.8447        | 991.4869        | 0.3578        | 1        | 39        | 0.02      | 2        | R.QALSMRDR.Q           |
| <a href="#">4433</a>  | 500.8192        | 1499.4357       | 1500.7718       | -1.3361       | 1        | 4         | 67        | 9        | R.QGMPSGEIERLLR.L      |
| <a href="#">10343</a> | 1039.6941       | 2077.3737       | 2075.9840       | 1.3897        | 2        | 6         | 37        | 4        | R.QALSMRDRQGMPSGEIER.L |

432. [gi|220700631|gb|EED56969.1|](#) Mass: 96403 Score: 39 Queries matched: 12 emPAI: 0.03

phospholipase PldA, putative [Aspergillus flavus NRRL3357]

| Query                | Observed        | Mr(expt)         | Mr(calc)         | Delta          | Miss     | Score    | Expect    | Rank     | Peptide                                                            |
|----------------------|-----------------|------------------|------------------|----------------|----------|----------|-----------|----------|--------------------------------------------------------------------|
| <a href="#">435</a>  | 438.9266        | 875.8387         | 875.4171         | 0.4216         | 0        | 14       | 7.1       | 5        | K.VCIVDDR.V                                                        |
| <a href="#">983</a>  | <b>343.0915</b> | <b>1026.2527</b> | <b>1026.6298</b> | <b>-0.3771</b> | <b>2</b> | <b>9</b> | <b>19</b> | <b>5</b> | <b>R.LDQVLKRR.A</b>                                                |
| <a href="#">2865</a> | 663.2146        | 1324.4147        | 1325.7554        | -1.3407        | 1        | 6        | 36        | 7        | R.INKTPALEALEK.E                                                   |
| <a href="#">3042</a> | <b>672.0646</b> | <b>1342.1147</b> | <b>1343.6504</b> | <b>-1.5356</b> | <b>0</b> | <b>7</b> | <b>30</b> | <b>3</b> | <b>K.DTVAHTTMLNGGK.M</b> <a href="#">3068</a> <a href="#">3069</a> |
| <a href="#">3985</a> | 723.8266        | 1445.6387        | 1443.7147        | 1.9241         | 0        | 7        | 30        | 4        | K.QGHLYDPYQPVK.D                                                   |
| <a href="#">4730</a> | 766.7951        | 1531.5757        | 1532.7623        | -1.1866        | 0        | 11       | 13        | 2        | K.ANFVQEELYVHGK.V                                                  |

[8170](#) **611.2819** **1830.8237** **1830.9839** **-0.1602** **2** **2** **95** **8** **R.AYDRINKTPALEALEK.E**  
[8696](#) 630.0209 1887.0407 1886.8832 0.1575 1 4 56 4 R.QPEATGTRAIMDYQYK.S  
[11388](#) **740.2889** **2217.8447** **2217.1277** **0.7170** **1** **39** **0.016** **1** **K.TPALEALEKEAGVTYNDIQR.G** [11389](#)

433. [gi|220694211|gb|EED50555.1|](#) Mass: 108949 Score: 39 Queries matched: 16 emPAI: 0.03

conserved hypothetical protein [Aspergillus flavus NRRL3357]

| Query                 | Observed        | Mr(expt)         | Mr(calc)         | Delta          | Miss     | Score      | Expect    | Rank     | Peptide                                                  |
|-----------------------|-----------------|------------------|------------------|----------------|----------|------------|-----------|----------|----------------------------------------------------------|
| <a href="#">64</a>    | 686.5530        | 685.5457         | 685.4123         | 0.1335         | 0        | 9          | 27        | 9        | R.IEVAVR.W                                               |
| <a href="#">810</a>   | 493.3681        | 984.7217         | 985.5920         | -0.8703        | 0        | 39         | 0.02      | 2        | R.LSSQGLLIR.G <a href="#">812</a>                        |
| <a href="#">1044</a>  | 520.6721        | 1039.3297        | 1039.4207        | -0.0910        | 0        | 7          | 32        | 4        | R.GTSGDDADFR.T                                           |
| <a href="#">1048</a>  | 521.6276        | 1041.2407        | 1040.4927        | 0.7480         | 0        | 6          | 40        | 4        | K.EGYLFDAAR.N                                            |
| <a href="#">2745</a>  | 437.5432        | 1309.6077        | 1310.6367        | -1.0290        | 1        | 9          | 19        | 4        | K.EGYLFDAARNR.R                                          |
| <a href="#">4714</a>  | 510.9072        | 1529.6997        | 1528.7933        | 0.9064         | 1        | 9          | 20        | 5        | K.RGCLGVLANTGHFK.T                                       |
| <a href="#">5377</a>  | 797.2286        | 1592.4427        | 1591.8359        | 0.6069         | 1        | 3          | 76        | 5        | K.FFRDQPDTLVAGVK.G                                       |
| <a href="#">9921</a>  | 678.8085        | 2033.4037        | 2034.9945        | -1.5908        | 0        | 3          | 74        | 3        | R.YCNAVAFSTHGLLAAGLDR.V                                  |
| <a href="#">11234</a> | 732.8909        | 2195.6507        | 2195.1488        | 0.5020         | 2        | 3          | 71        | 5        | K.FFRDQPDTLVAGVKQYVR.I                                   |
| <a href="#">11966</a> | 768.8232        | 2303.4477        | 2301.1601        | 2.2877         | 1        | 4          | 47        | 5        | R.TLSADSQHTKAAALAVFQDEAK.L <a href="#">11967</a>         |
| <a href="#">12453</a> | <b>793.4769</b> | <b>2377.4087</b> | <b>2376.1096</b> | <b>1.2991</b>  | <b>1</b> | <b>(4)</b> | <b>48</b> | <b>1</b> | <b>K.ACLAADAGQQAGKPTQAEMMRR.F</b>                        |
| <a href="#">12573</a> | 799.2449        | 2394.7127        | 2392.1046        | 2.6082         | 1        | 6          | 34        | 2        | K.ACLAADAGQQAGKPTQAEMMRR.F                               |
| <a href="#">14533</a> | <b>898.6955</b> | <b>2693.0647</b> | <b>2693.3997</b> | <b>-0.3350</b> | <b>1</b> | <b>1</b>   | <b>86</b> | <b>5</b> | <b>R.ILPSHDIQEISRENHHTKPLSSR.E</b> <a href="#">14524</a> |

434. [gi|220697584|gb|EED53925.1|](#) Mass: 48782 Score: 39 Queries matched: 8 emPAI: 0.14

methionine aminopeptidase, type II, putative [Aspergillus flavus NRRL3357]

| Query                 | Observed        | Mr(expt)         | Mr(calc)         | Delta          | Miss     | Score     | Expect         | Rank      | Peptide                                               |
|-----------------------|-----------------|------------------|------------------|----------------|----------|-----------|----------------|-----------|-------------------------------------------------------|
| <a href="#">602</a>   | <b>464.0976</b> | <b>926.1807</b>  | <b>926.5549</b>  | <b>-0.3742</b> | <b>0</b> | <b>11</b> | <b>10</b>      | <b>10</b> | <b>K.NLLNVINK.N</b> <a href="#">604</a>               |
| <a href="#">1051</a>  | 522.0461        | 1042.0777        | 1042.5407        | -0.4630        | 0        | 17        | 3.1            | 2         | K.LDLNGQGGA.A                                         |
| <a href="#">6166</a>  | <b>828.2176</b> | <b>1654.4207</b> | <b>1652.7754</b> | <b>1.6453</b>  | <b>2</b> | <b>0</b>  | <b>1.5e+02</b> | <b>4</b>  | <b>K.DDNLYRTTNEEKR.Y</b>                              |
| <a href="#">10667</a> | <b>708.7422</b> | <b>2123.2047</b> | <b>2121.9650</b> | <b>1.2397</b>  | <b>1</b> | <b>0</b>  | <b>1.2e+02</b> | <b>8</b>  | <b>R.MNNDFLQEYRQGAEVHR.Q</b>                          |
| <a href="#">11042</a> | <b>725.0885</b> | <b>2172.2437</b> | <b>2170.1481</b> | <b>2.0956</b>  | <b>0</b> | <b>29</b> | <b>0.17</b>    | <b>1</b>  | <b>K.TIKPGQTLTEIAEGIEESVR.A</b> <a href="#">11028</a> |
| <a href="#">14522</a> | 898.1942        | 2691.5607        | 2690.3989        | 1.1618         | 0        | 7         | 24             | 2         | K.YLLGLNNLVSSGIVQDYPPLCDIK.G                          |

435. [gi|220698460|gb|EED54800.1|](#) Score: 38 Queries matched: 13

ribosomal protein S15, putative [Aspergillus flavus NRRL3357]

| Query                | Observed        | Mr(expt)        | Mr(calc)        | Delta         | Miss     | Score     | Expect         | Rank     | Peptide              |
|----------------------|-----------------|-----------------|-----------------|---------------|----------|-----------|----------------|----------|----------------------|
| <a href="#">273</a>  | <b>410.5556</b> | <b>819.0967</b> | <b>818.4147</b> | <b>0.6820</b> | <b>0</b> | <b>12</b> | <b>13</b>      | <b>1</b> | <b>R.HLQEHR.N</b>    |
| <a href="#">772</a>  | <b>976.9700</b> | <b>975.9627</b> | <b>975.4733</b> | <b>0.4894</b> | <b>1</b> | <b>1</b>  | <b>1.4e+02</b> | <b>5</b> | <b>R.AGSAETRER.R</b> |
| <a href="#">953</a>  | 509.6606        | 1017.3067       | 1015.4822       | 1.8245        | 0        | 10        | 21             | 10       | R.DTADPQLEK.E        |
| <a href="#">967</a>  | 511.4011        | 1020.7877       | 1020.6556       | 0.1321        | 2        | 9         | 19             | 7        | R.LLVHKRQK.L         |
| <a href="#">2050</a> | 614.8086        | 1227.6027       | 1227.6935       | -0.0908       | 1        | 8         | 24             | 9        | R.NAQEAISRIVK.I      |

|                       |                 |                  |                  |               |          |          |           |          |                            |                                                                                     |
|-----------------------|-----------------|------------------|------------------|---------------|----------|----------|-----------|----------|----------------------------|-------------------------------------------------------------------------------------|
| <a href="#">3183</a>  | 679.6256        | 1357.2367        | 1356.6721        | 0.5647        | 1        | 11       | 14        | 2        | R.RHDPFLMAQSR.Q            | <a href="#">3171</a> <a href="#">3177</a> <a href="#">3179</a> <a href="#">3193</a> |
| <a href="#">6590</a>  | <b>562.4759</b> | <b>1684.4057</b> | <b>1683.9016</b> | <b>0.5042</b> | <b>2</b> | <b>2</b> | <b>93</b> | <b>5</b> | <b>R.KAANLSRQQALAEER.E</b> |                                                                                     |
| <a href="#">10633</a> | 1060.1936       | 2118.3727        | 2117.9979        | 0.3748        | 0        | 38       | 0.019     | 2        | R.LNYFVTPEGLQEAMEYSK.A     | <a href="#">10632</a>                                                               |

436. [gi|220701477|gb|EED57815.1|](#) Mass: 111194 Score: 38 Queries matched: 8 empAI: 0.03

Sec23/Sec24 family protein [Aspergillus flavus NRRL3357]

| Query                 | Observed        | Mr(expt)         | Mr(calc)         | Delta         | Miss     | Score     | Expect       | Rank     | Peptide                                       |
|-----------------------|-----------------|------------------|------------------|---------------|----------|-----------|--------------|----------|-----------------------------------------------|
| <a href="#">1662</a>  | 575.9396        | 1149.8647        | 1149.6254        | 0.2393        | 0        | 11        | 14           | 2        | R.QINLELAGHR.K                                |
| <a href="#">3885</a>  | 479.6542        | 1435.9407        | 1433.8215        | 2.1192        | 2        | 7         | 33           | 8        | R.QINLELAGHRKR.E                              |
| <a href="#">4620</a>  | 761.2316        | 1520.4487        | 1518.8042        | 1.6445        | 0        | 2         | 1e+02        | 9        | R.LFLIDVSVQESVNR.G                            |
| <a href="#">5360</a>  | <b>796.4001</b> | <b>1590.7857</b> | <b>1590.7435</b> | <b>0.0422</b> | <b>1</b> | <b>3</b>  | <b>81</b>    | <b>1</b> | <b>R.CRAYSINPFMTFR.S</b> <a href="#">5354</a> |
| <a href="#">10681</a> | 709.2229        | 2124.6467        | 2123.0171        | 1.6296        | 1        | 0         | 1.1e+02      | 9        | R.EDTSAEGSLTSLAGLRAPYW.-                      |
| <a href="#">11580</a> | <b>751.1795</b> | <b>2250.5167</b> | <b>2248.2249</b> | <b>2.2918</b> | <b>0</b> | <b>38</b> | <b>0.019</b> | <b>1</b> | <b>K.KPEPALLPALNAAMSALQATGGK.I</b>            |
| <a href="#">12666</a> | 804.2039        | 2409.5897        | 2408.2886        | 1.3011        | 2        | 2         | 78           | 6        | R.LFLIDVSVQESVNRGFLKGVCK.G                    |

437. [gi|220697844|gb|EED54184.1|](#) Mass: 38373 Score: 38 Queries matched: 9 empAI: 0.09

protein phosphatase 2A catalytic subunit Pph21, putative [Aspergillus flavus NRRL3357]

| Query                 | Observed        | Mr(expt)         | Mr(calc)         | Delta         | Miss     | Score    | Expect    | Rank     | Peptide                                                                          |
|-----------------------|-----------------|------------------|------------------|---------------|----------|----------|-----------|----------|----------------------------------------------------------------------------------|
| <a href="#">342</a>   | 846.8470        | 845.8397         | 845.4065         | 0.4332        | 0        | 6        | 57        | 8        | R.AGEPMSR.R                                                                      |
| <a href="#">903</a>   | 502.0581        | 1002.1017        | 1001.5076        | 0.5941        | 1        | 5        | 64        | 10       | R.AGEPMSRR.T                                                                     |
| <a href="#">3966</a>  | 722.7681        | 1443.5217        | 1442.6653        | 0.8564        | 0        | 8        | 24        | 6        | K.YTFLQFDPCPR.A                                                                  |
| <a href="#">6854</a>  | 852.6761        | 1703.3377        | 1702.8137        | 0.5240        | 0        | 2        | 92        | 9        | R.NVVTIFSAPNYCYR.C                                                               |
| <a href="#">10820</a> | 1072.7021       | 2143.3897        | 2142.9681        | 0.4217        | 0        | 38       | 0.019     | 2        | R.IGGPNPDTNYLFMGDYVDR.G <a href="#">10849</a>                                    |
| <a href="#">14248</a> | <b>885.4742</b> | <b>2653.4007</b> | <b>2651.2728</b> | <b>2.1279</b> | <b>0</b> | <b>8</b> | <b>20</b> | <b>1</b> | <b>R.GAGYTFGQDISEAFNHNNGLTLVAR.A</b> <a href="#">14239</a> <a href="#">14250</a> |

438. [gi|220700656|gb|EED56994.1|](#) Mass: 81812 Score: 38 Queries matched: 21 empAI: 0.04

metallopeptidase MepB [Aspergillus flavus NRRL3357]

| Query                 | Observed        | Mr(expt)         | Mr(calc)         | Delta         | Miss     | Score     | Expect       | Rank     | Peptide                                                                                                                   |
|-----------------------|-----------------|------------------|------------------|---------------|----------|-----------|--------------|----------|---------------------------------------------------------------------------------------------------------------------------|
| <a href="#">62</a>    | 685.4680        | 684.4607         | 684.4534         | 0.0073        | 0        | 8         | 23           | 5        | K.KPSLLK.H <a href="#">63</a>                                                                                             |
| <a href="#">340</a>   | 846.6320        | 845.6247         | 843.4926         | 2.1321        | 1        | 0         | 2e+02        | 7        | K.RLIEASR.K                                                                                                               |
| <a href="#">574</a>   | 917.5850        | 916.5777         | 916.5090         | 0.0687        | 1        | 16        | 5.4          | 3        | R.SRLTAGGQK.E <a href="#">573</a>                                                                                         |
| <a href="#">1156</a>  | 531.7741        | 1061.5337        | 1059.4832        | 2.0505        | 0        | 8         | 34           | 10       | K.NETLDPESR.R                                                                                                             |
| <a href="#">2552</a>  | 430.1202        | 1287.3387        | 1286.7306        | 0.6081        | 2        | 12        | 9.4          | 5        | R.SRLTAGGQKEIK.S <a href="#">2542</a> <a href="#">2545</a> <a href="#">2548</a> <a href="#">2550</a> <a href="#">2561</a> |
| <a href="#">4043</a>  | 484.7652        | 1451.2737        | 1450.6688        | 0.6049        | 1        | 8         | 24           | 4        | K.NDIEARGETFDGK.Y                                                                                                         |
| <a href="#">7099</a>  | <b>864.7591</b> | <b>1727.5037</b> | <b>1726.7832</b> | <b>0.7205</b> | <b>0</b> | <b>6</b>  | <b>32</b>    | <b>1</b> | <b>K.GGSQDEMTSLTEFLGR.E</b>                                                                                               |
| <a href="#">7863</a>  | <b>900.8121</b> | <b>1799.6097</b> | <b>1798.8447</b> | <b>0.7650</b> | <b>0</b> | <b>10</b> | <b>16</b>    | <b>1</b> | <b>K.AEAELDEFFIETVMR.E</b>                                                                                                |
| <a href="#">7864</a>  | 900.8486        | 1799.6827        | 1797.8872        | 1.7955        | 0        | 6         | 37           | 3        | R.QLHFGIFDMTVHEPK.S                                                                                                       |
| <a href="#">8961</a>  | 639.3315        | 1914.9727        | 1911.9901        | 2.9826        | 1        | 2         | 88           | 3        | K.LVDAVLNKNETLDPESR.R                                                                                                     |
| <a href="#">13620</a> | <b>845.2932</b> | <b>2532.8577</b> | <b>2531.2867</b> | <b>1.5710</b> | <b>0</b> | <b>33</b> | <b>0.062</b> | <b>1</b> | <b>K.EQAGDKPEPAEQIPDEVIANLIR.T</b> <a href="#">13616</a>                                                                  |

[13834](#) **857.0519** **2568.1337** **2565.1668** **2.9669** **0** **5** **39** **1** **R.DFVEAPSQMLENWCWTPSQLK.S**  
[14131](#) **877.9382** **2630.7927** **2629.4778** **1.3150** **2** **2** **67** **4** **R.RYPATALVCNFTKPTPKKPSLLK.H**

439. [gi|220691491|gb|EED47839.1|](#) **Mass:** 62807 **Score:** 38 **Queries matched:** 9 **empPAI:** 0.05  
 arylsulfatase, putative [Aspergillus flavus NRRL3357]

| Query                 | Observed        | Mr(expt)         | Mr(calc)         | Delta          | Miss     | Score     | Expect       | Rank     | Peptide                                   |
|-----------------------|-----------------|------------------|------------------|----------------|----------|-----------|--------------|----------|-------------------------------------------|
| <a href="#">1351</a>  | <b>549.7991</b> | <b>1097.5837</b> | <b>1096.6716</b> | <b>0.9121</b>  | <b>1</b> | <b>38</b> | <b>0.026</b> | <b>1</b> | <b>R.LERLIQLGR.V</b> <a href="#">1350</a> |
| <a href="#">2627</a>  | 432.8292        | 1295.4657        | 1292.6183        | 2.8474         | 1        | 6         | 43           | 4        | K.EIAPCSRGFEEK.N                          |
| <a href="#">9548</a>  | 664.4942        | 1990.4607        | 1991.9808        | -1.5201        | 0        | 6         | 38           | 2        | K.MEVFAAMVDLIDQNIQR.V                     |
| <a href="#">9677</a>  | <b>669.1185</b> | <b>2004.3337</b> | <b>2006.0771</b> | <b>-1.7434</b> | <b>2</b> | <b>7</b>  | <b>29</b>    | <b>1</b> | <b>R.AIRQGSWKALYMTAPLGK.D</b>             |
| <a href="#">10651</a> | 707.8335        | 2120.4787        | 2120.0758        | 0.4029         | 1        | 7         | 27           | 5        | R.KMEVFAAMVDLIDQNIQR.V                    |
| <a href="#">10758</a> | 713.3189        | 2136.9347        | 2136.0707        | 0.8640         | 1        | (6)       | 33           | 4        | R.KMEVFAAMVDLIDQNIQR.V                    |
| <a href="#">13888</a> | 860.9069        | 2579.6987        | 2578.2995        | 1.3992         | 2        | 8         | 18           | 3        | R.AGSARKMEVFAAMVDLIDQNIQR.V               |
| <a href="#">13889</a> | 861.0735        | 2580.1987        | 2578.2995        | 1.8992         | 2        | (8)       | 19           | 4        | R.AGSARKMEVFAAMVDLIDQNIQR.V               |

440. [gi|220700052|gb|EED56391.1|](#) **Mass:** 67233 **Score:** 38 **Queries matched:** 6 **empPAI:** 0.05  
 carbon catabolite repression protein CreD, putative [Aspergillus flavus NRRL3357]

| Query                 | Observed         | Mr(expt)         | Mr(calc)         | Delta          | Miss     | Score     | Expect       | Rank     | Peptide                                 |
|-----------------------|------------------|------------------|------------------|----------------|----------|-----------|--------------|----------|-----------------------------------------|
| <a href="#">148</a>   | 749.6270         | 748.6197         | 747.4167         | 1.2031         | 0        | 8         | 27           | 5        | R.YLDLPK.T <a href="#">146</a>          |
| <a href="#">781</a>   | 489.8611         | 977.7077         | 976.5705         | 1.1372         | 1        | 5         | 56           | 6        | K.YAKDIIVR.K                            |
| <a href="#">1400</a>  | 554.7066         | 1107.3987        | 1104.6655        | 2.7332         | 2        | 7         | 32           | 6        | R.KYAKDIIVR.K                           |
| <a href="#">4029</a>  | <b>725.8276</b>  | <b>1449.6407</b> | <b>1450.7086</b> | <b>-1.0679</b> | <b>1</b> | <b>3</b>  | <b>84</b>    | <b>5</b> | <b>K.TLTRCLQDQDTK.G</b>                 |
| <a href="#">15611</a> | <b>1021.5755</b> | <b>3061.7047</b> | <b>3059.5775</b> | <b>2.1272</b>  | <b>0</b> | <b>38</b> | <b>0.018</b> | <b>1</b> | <b>K.GLTIGQIVSqliESHDLTLNPEDPDSIR.N</b> |

441. [gi|220698436|gb|EED54776.1|](#) **Mass:** 22732 **Score:** 37 **Queries matched:** 7 **empPAI:** 0.15  
 glycolipid transfer protein HET-C2, putative [Aspergillus flavus NRRL3357]

| Query                | Observed        | Mr(expt)         | Mr(calc)         | Delta          | Miss     | Score     | Expect       | Rank     | Peptide                                    |
|----------------------|-----------------|------------------|------------------|----------------|----------|-----------|--------------|----------|--------------------------------------------|
| <a href="#">232</a>  | 800.4920        | 799.4847         | 799.5167         | -0.0320        | 0        | 18        | 3            | 4        | K.IVSILQK.F <a href="#">233</a>            |
| <a href="#">1315</a> | <b>546.4631</b> | <b>1090.9117</b> | <b>1090.5771</b> | <b>0.3346</b>  | <b>0</b> | <b>16</b> | <b>4</b>     | <b>1</b> | <b>R.GLDFTAQALR.R</b> <a href="#">1316</a> |
| <a href="#">1339</a> | <b>548.7561</b> | <b>1095.4977</b> | <b>1095.5196</b> | <b>-0.0219</b> | <b>0</b> | <b>37</b> | <b>0.027</b> | <b>1</b> | <b>K.TGEEELASSFR.E</b>                     |
| <a href="#">2408</a> | 637.4486        | 1272.8827        | 1272.6826        | 0.2001         | 0        | 1         | 1.3e+02      | 6        | K.VFSVAVGAAPNNK.N                          |
| <a href="#">7187</a> | <b>580.7772</b> | <b>1739.3097</b> | <b>1737.9890</b> | <b>1.3208</b>  | <b>2</b> | <b>6</b>  | <b>39</b>    | <b>1</b> | <b>K.TKKHTASEGLLWLV.R.G</b>                |

442. [gi|220691415|gb|EED47763.1|](#) **Mass:** 60276 **Score:** 37 **Queries matched:** 16 **empPAI:** 0.05  
 actin interacting protein 2 [Aspergillus flavus NRRL3357]

| Query                | Observed | Mr(expt)  | Mr(calc)  | Delta   | Miss | Score | Expect | Rank | Peptide                                                      |
|----------------------|----------|-----------|-----------|---------|------|-------|--------|------|--------------------------------------------------------------|
| <a href="#">2032</a> | 613.6701 | 1225.3257 | 1223.6662 | 1.6595  | 0    | 11    | 13     | 2    | R.NHLFPLDLGAK.G                                              |
| <a href="#">3134</a> | 676.7521 | 1351.4897 | 1352.7048 | -1.2151 | 0    | 7     | 29     | 3    | R.NGSISAEHGLGLAK.K <a href="#">3153</a> <a href="#">3157</a> |

|                       |                 |                  |                  |                |          |           |              |          |                                                      |
|-----------------------|-----------------|------------------|------------------|----------------|----------|-----------|--------------|----------|------------------------------------------------------|
| <a href="#">3518</a>  | 696.2946        | 1390.5747        | 1389.8204        | 0.7543         | 1        | 5         | 53           | 10       | R.GHTRLVLKPKQNK.E                                    |
| <a href="#">3768</a>  | <b>712.6971</b> | <b>1423.3797</b> | <b>1422.6780</b> | <b>0.7017</b>  | <b>0</b> | <b>37</b> | <b>0.029</b> | <b>1</b> | <b>K.LGFVGGDDDSFPVR.A</b>                            |
| <a href="#">5050</a>  | 781.6581        | 1561.3017        | 1560.7976        | 0.5041         | 0        | 5         | 53           | 3        | K.AIEPWVYEWIQK.R                                     |
| <a href="#">6681</a>  | <b>564.6949</b> | <b>1691.0627</b> | <b>1689.7920</b> | <b>1.2707</b>  | <b>1</b> | <b>5</b>  | <b>48</b>    | <b>4</b> | <b>K.KEFIGYSQDETMVK.L</b> <a href="#">6666</a>       |
| <a href="#">7929</a>  | 903.8086        | 1805.6027        | 1803.8825        | 1.7202         | 0        | 8         | 24           | 2        | K.SHLSEILSAFELMDGR.S                                 |
| <a href="#">9011</a>  | <b>640.8849</b> | <b>1919.6327</b> | <b>1917.9216</b> | <b>1.7111</b>  | <b>1</b> | <b>2</b>  | <b>83</b>    | <b>9</b> | <b>K.EFIGYSQDETMVKLMK.Q</b>                          |
| <a href="#">10906</a> | <b>718.8502</b> | <b>2153.5287</b> | <b>2154.0640</b> | <b>-0.5353</b> | <b>0</b> | <b>6</b>  | <b>31</b>    | <b>1</b> | <b>R.AVVGYGHMGDNLHLNLSVR.E</b> <a href="#">10926</a> |
| <a href="#">11914</a> | <b>766.7952</b> | <b>2297.3637</b> | <b>2296.1595</b> | <b>1.2042</b>  | <b>2</b> | <b>5</b>  | <b>36</b>    | <b>2</b> | <b>K.LMKQLKLDYDPNGIMNPYK.Y</b>                       |
| <a href="#">14148</a> | <b>879.4529</b> | <b>2635.3367</b> | <b>2636.4724</b> | <b>-1.1357</b> | <b>0</b> | <b>3</b>  | <b>54</b>    | <b>1</b> | <b>K.QLFIGAEGTIGVITGLSILCPPRPK.A</b>                 |
| <a href="#">14399</a> | 891.5249        | 2671.5527        | 2672.3129        | -0.7602        | 1        | 5         | 32           | 8        | R.AVVGYGHMGDNLHLNLSVREYNK.E                          |

443. [gi|220694306|gb|EED50650.1|](#) Mass: 26582 Score: 37 Queries matched: 6 emPAI: 0.13

orotate phosphoribosyltransferase [Aspergillus flavus NRRL3357]

| Query                 | Observed        | Mr(expt)         | Mr(calc)         | Delta         | Miss     | Score     | Expect      | Rank     | Peptide                                            |
|-----------------------|-----------------|------------------|------------------|---------------|----------|-----------|-------------|----------|----------------------------------------------------|
| <a href="#">3001</a>  | 669.9466        | 1337.8787        | 1337.7343        | 0.1444        | 0        | 6         | 39          | 10       | K.NNVSFGSFIK.S                                     |
| <a href="#">3253</a>  | <b>682.5441</b> | <b>1363.0737</b> | <b>1362.6892</b> | <b>0.3845</b> | <b>0</b> | <b>9</b>  | <b>20</b>   | <b>1</b> | <b>K.DHGEGNIVGAPLK.G</b>                           |
| <a href="#">5290</a>  | 793.6526        | 1585.2907        | 1584.8835        | 0.4072        | 2        | 8         | 25          | 4        | K.LGDKIGESEIQRLK.D <a href="#">5291</a>            |
| <a href="#">10370</a> | <b>694.3952</b> | <b>2080.1637</b> | <b>2078.0837</b> | <b>2.0801</b> | <b>0</b> | <b>31</b> | <b>0.11</b> | <b>1</b> | <b>R.ESPYFFTSSLHTAPLLR.A</b> <a href="#">10363</a> |

444. [gi|46370483|gb|AAS90018.1|](#) Mass: 46640 Score: 36 Queries matched: 5 emPAI: 0.07

OmtA [Aspergillus flavus]

| Query                 | Observed         | Mr(expt)         | Mr(calc)         | Delta          | Miss     | Score    | Expect    | Rank     | Peptide                              |
|-----------------------|------------------|------------------|------------------|----------------|----------|----------|-----------|----------|--------------------------------------|
| <a href="#">10520</a> | 1051.0501        | 2100.0857        | 2100.0595        | 0.0262         | 0        | 36       | 0.032     | 1        | R.ILLDEMIMPDLAQDSQR.F                |
| <a href="#">10814</a> | 715.2352         | 2142.6837        | 2140.0657        | 2.6181         | 1        | 2        | 79        | 1        | R.FMNQIDMTVVLTLNGKER.S               |
| <a href="#">11009</a> | <b>1085.1611</b> | <b>2168.3077</b> | <b>2167.2034</b> | <b>1.1043</b>  | <b>1</b> | <b>1</b> | <b>91</b> | <b>1</b> | <b>-.MALPNKAALVGLANTLSEQVK.C</b>     |
| <a href="#">12437</a> | 792.6655         | 2374.9747        | 2375.1824        | -0.2077        | 1        | 2        | 79        | 6        | K.SRILLDEMIMPDLAQDSQR.F              |
| <a href="#">15454</a> | <b>999.9832</b>  | <b>2996.9277</b> | <b>2997.4225</b> | <b>-0.4948</b> | <b>2</b> | <b>7</b> | <b>19</b> | <b>1</b> | <b>R.GCAQRFIFEEVAPQYAHTDASKMLR.V</b> |

445. [gi|220693839|gb|EED50184.1|](#) Mass: 44863 Score: 36 Queries matched: 12 emPAI: 0.07

conserved hypothetical protein [Aspergillus flavus NRRL3357]

| Query                | Observed        | Mr(expt)         | Mr(calc)         | Delta         | Miss     | Score     | Expect       | Rank     | Peptide                                  |
|----------------------|-----------------|------------------|------------------|---------------|----------|-----------|--------------|----------|------------------------------------------|
| <a href="#">478</a>  | 894.5330        | 893.5257         | 892.5018         | 1.0239        | 1        | 2         | 1e+02        | 10       | K.YVKDLAGK.A <a href="#">479</a>         |
| <a href="#">962</a>  | <b>510.6231</b> | <b>1019.2317</b> | <b>1017.4978</b> | <b>1.7339</b> | <b>0</b> | <b>7</b>  | <b>41</b>    | <b>8</b> | <b>K.AEQLAEETK.S</b>                     |
| <a href="#">1118</a> | 528.1031        | 1054.1917        | 1053.6155        | 0.5762        | 2        | 8         | 24           | 8        | R.TPLRNAR.Y                              |
| <a href="#">2657</a> | 650.5141        | 1299.0137        | 1299.7511        | -0.7373       | 2        | 3         | 88           | 8        | K.GKLDVDTAVKVR.D                         |
| <a href="#">3738</a> | <b>710.0426</b> | <b>1418.0707</b> | <b>1416.6674</b> | <b>1.4034</b> | <b>0</b> | <b>36</b> | <b>0.038</b> | <b>1</b> | <b>K.TPEPDEAFGWLR.D</b>                  |
| <a href="#">4703</a> | <b>765.2751</b> | <b>1528.5357</b> | <b>1527.7576</b> | <b>0.7781</b> | <b>2</b> | <b>5</b>  | <b>50</b>    | <b>6</b> | <b>M.LSRSSRFATSCTR.Q</b>                 |
| <a href="#">6111</a> | 551.1805        | 1650.5197        | 1648.8420        | 1.6777        | 2        | 10        | 16           | 4        | K.DLAGKAKESGFNLDK.L <a href="#">6098</a> |
| <a href="#">7234</a> | 581.2545        | 1740.7417        | 1737.7516        | 2.9902        | 0        | 3         | 77           | 9        | K.EMGSAYGPQAQEEVDK.T                     |



[10285](#) 690.4332 2068.2777 2069.0793 -0.8016 2 3 74 6 K.TIVQTANQTEAYFKEAKK.K  
[12688](#) 805.3652 2413.0737 2410.1474 2.9263 2 3 64 2 R.LKEMGSAYGPQAQEEVDKTKW.Q

446. [gi|220696817|gb|EED53158.1|](#) Mass: 46296 Score: 36 Queries matched: 9 empAI: 0.07  
 phosphoserine aminotransferase [Aspergillus flavus NRRL3357]

| Query                 | Observed        | Mr(expt)         | Mr(calc)         | Delta         | Miss     | Score      | Expect       | Rank     | Peptide                                                  |
|-----------------------|-----------------|------------------|------------------|---------------|----------|------------|--------------|----------|----------------------------------------------------------|
| <a href="#">1228</a>  | 538.0931        | 1074.1717        | 1072.5149        | 1.6568        | 0        | 8          | 27           | 3        | K.VDGQQAEAQK.K                                           |
| <a href="#">2266</a>  | 629.7576        | 1257.5007        | 1257.6565        | -0.1557       | 1        | 5          | 60           | 4        | R.VIKGGNVDEAEK.A                                         |
| <a href="#">2843</a>  | <b>661.2866</b> | <b>1320.5587</b> | <b>1319.6755</b> | <b>0.8833</b> | <b>0</b> | <b>9</b>   | <b>20</b>    | <b>1</b> | <b>R.SEIAANILN<del>T</del>MK.A</b> <a href="#">2821</a>  |
| <a href="#">8282</a>  | <b>923.4576</b> | <b>1844.9007</b> | <b>1844.0117</b> | <b>0.8890</b> | <b>0</b> | <b>36</b>  | <b>0.035</b> | <b>1</b> | <b>K.LGLPIAPTILDYCVTAK.N</b>                             |
| <a href="#">10413</a> | 1043.7766       | 2085.5387        | 2086.1058        | -0.5671       | 2        | 2          | 80           | 6        | K.KLLATFPDKVDGQQAEAQK.K                                  |
| <a href="#">10579</a> | 704.0982        | 2109.2727        | 2107.1313        | 2.1414        | 1        | 3          | 74           | 4        | R.ASNYNAI PVSGAEKLVAYLK.E                                |
| <a href="#">14781</a> | <b>916.7462</b> | <b>2747.2167</b> | <b>2744.3367</b> | <b>2.8800</b> | <b>2</b> | <b>(3)</b> | <b>51</b>    | <b>4</b> | <b>K.ADMIYEADAYPEVYKVVDPKSVR.S</b> <a href="#">14782</a> |

447. [gi|220699236|gb|EED55575.1|](#) Mass: 20455 Score: 36 Queries matched: 3 empAI: 0.16  
 transmembrane protein 14, putative [Aspergillus flavus NRRL3357]

| Query                 | Observed        | Mr(expt)         | Mr(calc)         | Delta         | Miss     | Score     | Expect       | Rank     | Peptide                                                                         |
|-----------------------|-----------------|------------------|------------------|---------------|----------|-----------|--------------|----------|---------------------------------------------------------------------------------|
| <a href="#">12857</a> | <b>812.5345</b> | <b>2434.5817</b> | <b>2433.2751</b> | <b>1.3066</b> | <b>0</b> | <b>36</b> | <b>0.033</b> | <b>1</b> | <b>R.TGQTYGDELGLLASIVLSGSSIPR.A</b> <a href="#">12852</a> <a href="#">12876</a> |

448. [gi|1762235|gb|AAC23536.1|](#) Mass: 193373 Score: 36 Queries matched: 30 empAI: 0.02  
 polyketide synthase PKSL2 [Aspergillus parasiticus]

| Query                | Observed        | Mr(expt)         | Mr(calc)         | Delta          | Miss     | Score     | Expect     | Rank     | Peptide                                |
|----------------------|-----------------|------------------|------------------|----------------|----------|-----------|------------|----------|----------------------------------------|
| <a href="#">85</a>   | 704.1170        | 703.1097         | 702.4024         | 0.7073         | 1        | 17        | 4.8        | 2        | R.SRALEK.H                             |
| <a href="#">113</a>  | 723.4480        | 722.4407         | 723.3551         | -0.9144        | 0        | 36        | 0.036      | 2        | R.FDSLRS.Q                             |
| <a href="#">701</a>  | 482.3616        | 962.7087         | 962.5219         | 0.1869         | 1        | 2         | 1.2e+02    | 8        | K.KILSMESR.G <a href="#">700</a>       |
| <a href="#">1295</a> | <b>544.6236</b> | <b>1087.2327</b> | <b>1088.5284</b> | <b>-1.2957</b> | <b>0</b> | <b>5</b>  | <b>63</b>  | <b>8</b> | <b>R.TNGIMAPN<del>Q</del>K.A</b>       |
| <a href="#">1381</a> | 553.0001        | 1103.9857        | 1103.5870        | 0.3988         | 1        | 20        | 1.9        | 3        | R.CVAATLGTRR.S                         |
| <a href="#">1615</a> | <b>571.0941</b> | <b>1140.1737</b> | <b>1139.7251</b> | <b>0.4486</b>  | <b>2</b> | <b>2</b>  | <b>89</b>  | <b>9</b> | <b>K.GARRIILVSR.R</b>                  |
| <a href="#">2354</a> | 634.0501        | 1266.0857        | 1265.6074        | 0.4783         | 0        | 1         | 1.1e+02    | 10       | R.EIGMAAGSEFVR.A                       |
| <a href="#">2989</a> | 669.2391        | 1336.4637        | 1335.7108        | 0.7529         | 0        | 7         | 35         | 8        | R.EYVLDLVNIMK.Y <a href="#">2982</a>   |
| <a href="#">5312</a> | 794.7321        | 1587.4497        | 1586.7736        | 0.6761         | 1        | 2         | 97         | 9        | R.MHDVDKHNLLGHR.T <a href="#">5292</a> |
| <a href="#">5931</a> | 819.4726        | 1636.9307        | 1637.7719        | -0.8412        | 0        | 4         | 62         | 2        | K.TQAATQAEWMSTIGK.Q                    |
| <a href="#">6789</a> | 851.0226        | 1700.0307        | 1698.9338        | 1.0969         | 1        | 7         | 31         | 2        | R.GEGAUVILKNMAEAVK.N                   |
| <a href="#">7327</a> | 876.6786        | 1751.3427        | 1750.9802        | 0.3625         | 2        | 3         | 70         | 2        | R.NADIVRISDGIPRVAR.L                   |
| <a href="#">7630</a> | 593.9559        | 1778.8457        | 1778.0090        | 0.8367         | 0        | 6         | 37         | 9        | K.HEPLPSPLLVDAIHK.V                    |
| <a href="#">7898</a> | 902.2686        | 1802.5227        | 1801.9574        | 0.5654         | 1        | 2         | 93         | 3        | K.EEIEAFALNLNKGIK.T                    |
| <a href="#">8231</a> | <b>614.1242</b> | <b>1839.3507</b> | <b>1839.9512</b> | <b>-0.6005</b> | <b>1</b> | <b>14</b> | <b>5.9</b> | <b>1</b> | <b>K.NMAEAVKNGDHILATLK.G</b>           |
| <a href="#">8846</a> | 952.0921        | 1902.1697        | 1903.0679        | -0.8982        | 1        | 0         | 1.3e+02    | 2        | K.NWAALVHSASPLAPTIKK.I                 |
| <a href="#">9022</a> | <b>641.2489</b> | <b>1920.7247</b> | <b>1919.9424</b> | <b>0.7823</b>  | <b>1</b> | <b>2</b>  | <b>86</b>  | <b>4</b> | <b>R.RSQGVNTIAMQWTSWR.E</b>            |

|                       |                 |                  |                  |                |          |          |                |          |                                               |
|-----------------------|-----------------|------------------|------------------|----------------|----------|----------|----------------|----------|-----------------------------------------------|
| <a href="#">9853</a>  | 676.3122        | 2025.9147        | 2025.1696        | 0.7451         | 1        | 5        | 37             | 2        | R.VLAPKIAGSLTLNMLFPPK.T <a href="#">9848</a>  |
| <a href="#">10102</a> | <b>683.9772</b> | <b>2048.9097</b> | <b>2048.1378</b> | <b>0.7719</b>  | <b>1</b> | <b>2</b> | <b>85</b>      | <b>1</b> | <b>R.VIKADTATSLAQAPLHGLSR.I</b>               |
| <a href="#">10211</a> | 1031.3806       | 2060.7467        | 2059.1690        | 1.5777         | 2        | 5        | 45             | 5        | R.RKNWAALVHSASPLPTIK.K <a href="#">10188</a>  |
| <a href="#">10658</a> | 708.4279        | 2122.2617        | 2122.0841        | 0.1777         | 2        | 3        | 60             | 2        | R.RSLKTQAATQAEWMSTIGK.Q <a href="#">10657</a> |
| <a href="#">11927</a> | <b>767.4425</b> | <b>2299.3057</b> | <b>2298.1036</b> | <b>1.2021</b>  | <b>2</b> | <b>5</b> | <b>45</b>      | <b>3</b> | <b>R.SEHTTRMHDVDKHLLGHR.T</b>                 |
| <a href="#">12452</a> | <b>793.4269</b> | <b>2377.2587</b> | <b>2378.3468</b> | <b>-1.0880</b> | <b>2</b> | <b>0</b> | <b>1.1e+02</b> | <b>7</b> | <b>K.AVMSVQKILPPQANLKTNLNTR.V</b>             |
| <a href="#">15395</a> | 991.4799        | 2971.4177        | 2970.3454        | 1.0724         | 1        | 1        | 90             | 10       | K.NIENFDASFFNISPKEAEQMDPQQR.L                 |

449. [gi|220688427|gb|EED44780.1|](#) Mass: 121340 Score: 36 Queries matched: 20 emPAI: 0.03

polyketide synthase, putative [Aspergillus flavus NRRL3357]

| Query                 | Observed         | Mr(expt)         | Mr(calc)         | Delta          | Miss     | Score     | Expect         | Rank     | Peptide                                      |
|-----------------------|------------------|------------------|------------------|----------------|----------|-----------|----------------|----------|----------------------------------------------|
| <a href="#">85</a>    | 704.1170         | 703.1097         | 702.4024         | 0.7073         | 1        | 17        | 4.8            | 2        | R.SRALEK.H                                   |
| <a href="#">113</a>   | 723.4480         | 722.4407         | 723.3551         | -0.9144        | 0        | 36        | 0.036          | 2        | R.FDSLRS.Q                                   |
| <a href="#">701</a>   | 482.3616         | 962.7087         | 962.5219         | 0.1869         | 1        | 2         | 1.2e+02        | 8        | K.KILSMESR.G <a href="#">700</a>             |
| <a href="#">1295</a>  | 544.6236         | 1087.2327        | 1088.5284        | -1.2957        | 0        | 5         | 63             | 8        | R.TNGIMAPNQK.A                               |
| <a href="#">1381</a>  | 553.0001         | 1103.9857        | 1103.5870        | 0.3988         | 1        | 20        | 1.9            | 3        | R.CVAATLGTRR.S                               |
| <a href="#">2140</a>  | <b>414.9342</b>  | <b>1241.7807</b> | <b>1239.6499</b> | <b>2.1308</b>  | <b>0</b> | <b>10</b> | <b>16</b>      | <b>1</b> | <b>K.YIQTGPAIYSK.E</b>                       |
| <a href="#">2354</a>  | 634.0501         | 1266.0857        | 1265.6074        | 0.4783         | 0        | 1         | 1.1e+02        | 10       | R.EIGMAAGSEFVR.A                             |
| <a href="#">2434</a>  | <b>638.9301</b>  | <b>1275.8457</b> | <b>1275.6241</b> | <b>0.2216</b>  | <b>1</b> | <b>3</b>  | <b>89</b>      | <b>5</b> | <b>K.VDASSEIPMR.W <a href="#">2463</a></b>   |
| <a href="#">6789</a>  | 851.0226         | 1700.0307        | 1698.9338        | 1.0969         | 1        | 7         | 31             | 2        | R.GEGAAVVILKNMAEAVK.D                        |
| <a href="#">7630</a>  | 593.9559         | 1778.8457        | 1778.0090        | 0.8367         | 0        | 6         | 37             | 9        | K.HEPLPSPLLVDIAIHK.I                         |
| <a href="#">7898</a>  | 902.2686         | 1802.5227        | 1801.9574        | 0.5654         | 1        | 2         | 93             | 3        | K.EEIEAFALNLLNKGIK.T                         |
| <a href="#">8250</a>  | 614.8005         | 1841.3797        | 1840.9353        | 0.4445         | 1        | 3         | 81             | 2        | K.NMAEAVKGDHILATLK.G                         |
| <a href="#">9259</a>  | <b>651.9549</b>  | <b>1952.8427</b> | <b>1951.8959</b> | <b>0.9468</b>  | <b>1</b> | <b>1</b>  | <b>1.1e+02</b> | <b>9</b> | <b>R.RSQGDNTIAMQWTSWR.E</b>                  |
| <a href="#">9303</a>  | 654.1135         | 1959.3187        | 1959.8237        | -0.5050        | 0        | 4         | 60             | 4        | -.MEANDSPHDVAVVGMGCR.L                       |
| <a href="#">9853</a>  | 676.3122         | 2025.9147        | 2025.1696        | 0.7451         | 1        | 5         | 37             | 2        | R.VLAPKIAGSLTLNMLFPPK.T <a href="#">9848</a> |
| <a href="#">10572</a> | <b>1054.8326</b> | <b>2107.6507</b> | <b>2109.0161</b> | <b>-1.3653</b> | <b>1</b> | <b>4</b>  | <b>54</b>      | <b>2</b> | <b>R.RSLETQAATQAEWMSTVGK.Q</b>               |
| <a href="#">12452</a> | 793.4269         | 2377.2587        | 2378.3468        | -1.0880        | 2        | 0         | 1.1e+02        | 7        | K.AVMSVQKILPPQANLKTNLNTR.V                   |

450. [gi|220699699|gb|EED56038.1|](#) Mass: 37093 Score: 36 Queries matched: 11 emPAI: 0.09

phosphatidylinositol transporter, putative [Aspergillus flavus NRRL3357]

| Query                | Observed        | Mr(expt)         | Mr(calc)         | Delta          | Miss     | Score     | Expect         | Rank      | Peptide                                             |
|----------------------|-----------------|------------------|------------------|----------------|----------|-----------|----------------|-----------|-----------------------------------------------------|
| <a href="#">294</a>  | 831.4050        | 830.3977         | 830.4134         | -0.0157        | 0        | 31        | 0.19           | 2         | K.EDQNVVK.N <a href="#">296</a> <a href="#">304</a> |
| <a href="#">1094</a> | <b>525.3511</b> | <b>1048.6877</b> | <b>1048.4825</b> | <b>0.2052</b>  | <b>0</b> | <b>6</b>  | <b>50</b>      | <b>3</b>  | <b>K.EFGTDDLPR.T</b>                                |
| <a href="#">2495</a> | 641.7091        | 1281.4037        | 1280.6798        | 0.7239         | 1        | 4         | 63             | 8         | K.LGKIDLNAMYK.I                                     |
| <a href="#">2865</a> | <b>663.2146</b> | <b>1324.4147</b> | <b>1323.6306</b> | <b>0.7841</b>  | <b>0</b> | <b>36</b> | <b>0.042</b>   | <b>1</b>  | <b>R.SELEQLGYTER.L</b>                              |
| <a href="#">3450</a> | <b>692.5236</b> | <b>1383.0327</b> | <b>1382.6751</b> | <b>0.3576</b>  | <b>0</b> | <b>1</b>  | <b>1.3e+02</b> | <b>10</b> | <b>R.MLQNLVTEYEK.L <a href="#">3453</a></b>         |
| <a href="#">4411</a> | <b>748.7076</b> | <b>1495.4007</b> | <b>1495.7085</b> | <b>-0.3077</b> | <b>0</b> | <b>8</b>  | <b>23</b>      | <b>1</b>  | <b>K.LLETCTIMDLK.G</b>                              |
| <a href="#">8623</a> | 628.6299        | 1882.8677        | 1879.9569        | 2.9108         | 2        | 8         | 23             | 1         | R.KAGKLETCCTIMDLK.G                                 |

[9014](#) **641.0115** **1920.0127** **1918.9822** **1.0305** **1** **7** **29** **1** **R.MLQNLVTEYEKLDPR.L**

451. [gi|220696458|gb|EED52800.1|](#) **Mass:** 48514 **Score:** 35 **Queries matched:** 11 **empAI:** 0.14

aspartate transaminase, putative [Aspergillus flavus NRRL3357]

| Query                 | Observed        | Mr(expt)         | Mr(calc)         | Delta         | Miss     | Score     | Expect       | Rank     | Peptide                                                          |
|-----------------------|-----------------|------------------|------------------|---------------|----------|-----------|--------------|----------|------------------------------------------------------------------|
| <a href="#">138</a>   | 745.5370        | 744.5297         | 744.4130         | 0.1168        | 1        | 12        | 14           | 5        | R.ERLEAK.G                                                       |
| <a href="#">1226</a>  | 537.9831        | 1073.9517        | 1072.6175        | 1.3342        | 2        | 6         | 51           | 3        | R.IAEMRKGLR.E                                                    |
| <a href="#">1527</a>  | <b>565.1746</b> | <b>1128.3347</b> | <b>1126.6346</b> | <b>1.7001</b> | <b>0</b> | <b>28</b> | <b>0.31</b>  | <b>1</b> | <b>K.VILGSDSPAIR.E</b> <a href="#">1511</a> <a href="#">1528</a> |
| <a href="#">1746</a>  | 585.6301        | 1169.2457        | 1166.5536        | 2.6921        | 1        | 9         | 19           | 7        | R.TMSGRIAEMR.K                                                   |
| <a href="#">3867</a>  | <b>478.5692</b> | <b>1432.6857</b> | <b>1430.7307</b> | <b>1.9551</b> | <b>0</b> | <b>27</b> | <b>0.3</b>   | <b>1</b> | <b>R.AGAFHFVSAPGATAK.N</b>                                       |
| <a href="#">4585</a>  | 759.5126        | 1517.0107        | 1515.7569        | 1.2538        | 0        | 6         | 37           | 8        | R.NDPSINNEYLPK.G                                                 |
| <a href="#">13518</a> | <b>841.6612</b> | <b>2521.9617</b> | <b>2521.2271</b> | <b>0.7346</b> | <b>0</b> | <b>35</b> | <b>0.035</b> | <b>1</b> | <b>R.ISMAGLNTHNIDYFAEAVDSVVR.E</b> <a href="#">13538</a>         |
| <a href="#">14138</a> | 878.6472        | 2632.9197        | 2630.2415        | 2.6783        | 2        | 1         | 90           | 9        | R.ERRHFPFFDTAYQGFASGDLNR.D                                       |

452. [gi|220692426|gb|EED48773.1|](#) **Mass:** 55898 **Score:** 35 **Queries matched:** 5 **empAI:** 0.06

oligosaccharyl transferase subunit (alpha), putative [Aspergillus flavus NRRL3357]

| Query                 | Observed        | Mr(expt)         | Mr(calc)         | Delta         | Miss     | Score     | Expect       | Rank     | Peptide                             |
|-----------------------|-----------------|------------------|------------------|---------------|----------|-----------|--------------|----------|-------------------------------------|
| <a href="#">359</a>   | 428.6501        | 855.2857         | 853.5021         | 1.7836        | 0        | 7         | 27           | 4        | R.VILPEGAR.N                        |
| <a href="#">1527</a>  | 565.1746        | 1128.3347        | 1127.6411        | 0.6936        | 2        | 15        | 5.7          | 2        | K.VGGLEVRDRK.A <a href="#">1528</a> |
| <a href="#">4215</a>  | <b>737.7961</b> | <b>1473.5777</b> | <b>1472.7915</b> | <b>0.7862</b> | <b>0</b> | <b>35</b> | <b>0.049</b> | <b>1</b> | <b>K.YFAIDLPEPLAPK.S</b>            |
| <a href="#">12850</a> | 1217.9406       | 2433.8667        | 2431.1867        | 2.6800        | 0        | 3         | 60           | 3        | K.LPSTNVPDYTTTSGLKPGSDPER.Q         |

453. [gi|220694178|gb|EED50522.1|](#) **Mass:** 47405 **Score:** 35 **Queries matched:** 7 **empAI:** 0.07

Arp2/3 complex subunit (Arp3), putative [Aspergillus flavus NRRL3357]

| Query                 | Observed        | Mr(expt)         | Mr(calc)         | Delta          | Miss     | Score     | Expect       | Rank     | Peptide                           |
|-----------------------|-----------------|------------------|------------------|----------------|----------|-----------|--------------|----------|-----------------------------------|
| <a href="#">665</a>   | 956.0490        | 955.0417         | 955.4512         | -0.4094        | 1        | 7         | 28           | 7        | K.EFARYDR.E                       |
| <a href="#">695</a>   | 481.4921        | 960.9697         | 960.4737         | 0.4960         | 1        | 12        | 12           | 3        | R.ASEARSGGAR.S                    |
| <a href="#">3151</a>  | <b>677.8726</b> | <b>1353.7307</b> | <b>1353.7292</b> | <b>0.0015</b>  | <b>0</b> | <b>35</b> | <b>0.046</b> | <b>1</b> | <b>R.DITYFVQSLLR.D</b>            |
| <a href="#">8632</a>  | 629.2142        | 1884.6207        | 1884.9271        | -0.3064        | 0        | 2         | 94           | 4        | R.HGPWFGGSLLGQTPEFR.S             |
| <a href="#">10515</a> | <b>700.8335</b> | <b>2099.4787</b> | <b>2100.0348</b> | <b>-0.5561</b> | <b>1</b> | <b>3</b>  | <b>67</b>    | <b>1</b> | <b>K.HTVTSPNGRSVNIDVGYER.F</b>    |
| <a href="#">12995</a> | 819.6592        | 2455.9557        | 2454.2979        | 1.6578         | 2        | 2         | 82           | 6        | R.LLKHTVTSPNGRSVNIDVGYER.F        |
| <a href="#">15588</a> | 1019.2759       | 3054.8057        | 3055.4563        | -0.6506        | 0        | 3         | 48           | 2        | R.GTEDLDFFIGDEALAAANGPGYGINYPYR.H |

454. [gi|220700573|gb|EED56911.1|](#) **Mass:** 70711 **Score:** 35 **Queries matched:** 20 **empAI:** 0.05

structure-specific recognition protein, putative [Aspergillus flavus NRRL3357]

| Query               | Observed | Mr(expt)  | Mr(calc)  | Delta  | Miss | Score | Expect | Rank | Peptide       |
|---------------------|----------|-----------|-----------|--------|------|-------|--------|------|---------------|
| <a href="#">239</a> | 803.7220 | 802.7147  | 801.4782  | 1.2365 | 1    | 6     | 49     | 8    | K.KVIMPSK.D   |
| <a href="#">915</a> | 503.9706 | 1005.9267 | 1004.6131 | 1.3136 | 2    | 7     | 36     | 8    | K.IFRGLSGKK.V |

|                       |                 |                  |                  |                |          |           |                |          |                                                                                                                          |
|-----------------------|-----------------|------------------|------------------|----------------|----------|-----------|----------------|----------|--------------------------------------------------------------------------------------------------------------------------|
| <a href="#">1221</a>  | 537.6926        | 1073.3707        | 1070.5471        | 2.8237         | 0        | 6         | 48             | 9        | R.FYIPGTVMK.T                                                                                                            |
| <a href="#">2162</a>  | <b>623.4551</b> | <b>1244.8957</b> | <b>1243.7322</b> | <b>1.1635</b>  | <b>2</b> | <b>4</b>  | <b>65</b>      | <b>1</b> | <b>R.GLSGKKVIMPSK.D</b>                                                                                                  |
| <a href="#">4225</a>  | <b>738.1476</b> | <b>1474.2807</b> | <b>1475.6575</b> | <b>-1.3768</b> | <b>0</b> | <b>0</b>  | <b>1.5e+02</b> | <b>7</b> | <b>K.AGMGEHQFSNINR.E</b>                                                                                                 |
| <a href="#">5755</a>  | 812.4071        | 1622.7997        | 1621.7988        | 1.0010         | 1        | 2         | 1e+02          | 8        | R.EEQPLEEFFKAK.N                                                                                                         |
| <a href="#">5757</a>  | 812.4766        | 1622.9387        | 1621.7195        | 1.2192         | 1        | 8         | 22             | 4        | R.GRFDIDMYESSFR.L                                                                                                        |
| <a href="#">9158</a>  | <b>647.7345</b> | <b>1940.1817</b> | <b>1940.8752</b> | <b>-0.6935</b> | <b>0</b> | <b>9</b>  | <b>18</b>      | <b>1</b> | <b>R.SSGVIQLDGFQEDFER.L</b> <a href="#">9150</a>                                                                         |
| <a href="#">11685</a> | <b>756.5332</b> | <b>2266.5777</b> | <b>2265.0875</b> | <b>1.4903</b>  | <b>1</b> | <b>4</b>  | <b>45</b>      | <b>1</b> | <b>R.LESFSKMESFDNIYLDLSK.Q</b> <a href="#">11686</a>                                                                     |
| <a href="#">13004</a> | 820.5772        | 2458.7097        | 2457.2540        | 1.4557         | 0        | 35        | 0.037          | 1        | K.AEIGDVAGDTFATFLDVLHLTPR.G <a href="#">13001</a>                                                                        |
| <a href="#">13849</a> | <b>858.2332</b> | <b>2571.6777</b> | <b>2571.2084</b> | <b>0.4694</b>  | <b>1</b> | <b>12</b> | <b>8</b>       | <b>1</b> | <b>K.LDEEISLELNMTDELMETRYK.D</b> <a href="#">13850</a> <a href="#">13853</a> <a href="#">13861</a> <a href="#">13868</a> |
| <a href="#">15011</a> | 938.8859        | 2813.6357        | 2814.3303        | -0.6945        | 2        | 3         | 49             | 1        | K.LDEEISLELNMTDELMETRYKDK.L                                                                                              |
| <a href="#">16084</a> | 1099.1385       | 3294.3937        | 3295.4205        | -1.0267        | 1        | 2         | 61             | 3        | K.NEMSDDAGALLAAALDNDVMGSSDDEGVRADR.G                                                                                     |

455. [gi|220691595|gb|EED47943.1|](#) Mass: 159466 Score: 35 Queries matched: 48 emPAI: 0.02

exonuclease Kex1, putative [Aspergillus flavus NRRL3357]

| Query                 | Observed        | Mr(expt)         | Mr(calc)         | Delta          | Miss     | Score     | Expect       | Rank     | Peptide                                                                         |
|-----------------------|-----------------|------------------|------------------|----------------|----------|-----------|--------------|----------|---------------------------------------------------------------------------------|
| <a href="#">187</a>   | 774.4690        | 773.4617         | 772.4595         | 1.0022         | 1        | 8         | 39           | 10       | R.WIQAKK.N                                                                      |
| <a href="#">691</a>   | 481.0391        | 960.0637         | 960.5604         | -0.4966        | 1        | 13        | 9.7          | 10       | R.SSSLLAKQK.L                                                                   |
| <a href="#">1793</a>  | <b>589.6161</b> | <b>1177.2177</b> | <b>1176.6291</b> | <b>0.5886</b>  | <b>0</b> | <b>35</b> | <b>0.055</b> | <b>1</b> | <b>K.FPEFIAGIQR.N</b>                                                           |
| <a href="#">1961</a>  | 607.0206        | 1212.0267        | 1211.5492        | 0.4775         | 1        | 4         | 62           | 5        | R.DFELDMNGKK.M                                                                  |
| <a href="#">1999</a>  | 610.1726        | 1218.3307        | 1218.6244        | -0.2937        | 0        | 17        | 4.1          | 7        | K.FLEQLADDLR.L <a href="#">2003</a> <a href="#">2004</a>                        |
| <a href="#">2343</a>  | 633.7021        | 1265.3897        | 1264.5836        | 0.8061         | 1        | 5         | 48           | 6        | R.RGDSGWFEFSPK.A                                                                |
| <a href="#">3086</a>  | 450.2845        | 1347.8317        | 1346.7194        | 1.1123         | 1        | 13        | 8.6          | 2        | R.KFLEQLADDLR.L <a href="#">3075</a> <a href="#">3080</a> <a href="#">3084</a>  |
| <a href="#">3715</a>  | 708.8436        | 1415.6727        | 1414.8256        | 0.8471         | 2        | 7         | 31           | 4        | R.SSSLLAKQKLGQR.V                                                               |
| <a href="#">4284</a>  | 494.0359        | 1479.0857        | 1476.7936        | 2.2921         | 2        | 8         | 25           | 6        | R.FRTALDAEVAKK.A <a href="#">4266</a> <a href="#">4273</a> <a href="#">4279</a> |
| <a href="#">4885</a>  | 773.6951        | 1545.3757        | 1544.6815        | 0.6942         | 0        | 2         | 1.1e+02      | 3        | K.NGGENNESQERPK.S <a href="#">4866</a>                                          |
| <a href="#">5399</a>  | 532.6422        | 1594.9047        | 1596.7671        | -1.8624        | 0        | 7         | 27           | 3        | R.EYLELEFQELER.T                                                                |
| <a href="#">5489</a>  | 802.1671        | 1602.3197        | 1602.8730        | -0.5532        | 1        | 5         | 46           | 5        | R.VVYAQDSGKVP IATR.G                                                            |
| <a href="#">6125</a>  | 551.4962        | 1651.4667        | 1650.7645        | 0.7022         | 1        | 3         | 79           | 5        | R.GAVAGMNGRNGFSQR.G                                                             |
| <a href="#">6414</a>  | 558.6409        | 1672.9007        | 1672.7764        | 0.1243         | 1        | 2         | 87           | 9        | K.KNGGENNESQERPK.S                                                              |
| <a href="#">7079</a>  | <b>863.4756</b> | <b>1724.9367</b> | <b>1725.7814</b> | <b>-0.8447</b> | <b>0</b> | <b>2</b>  | <b>81</b>    | <b>1</b> | <b>K.MGGYINEQGVINMER.L</b>                                                      |
| <a href="#">7716</a>  | <b>893.3696</b> | <b>1784.7247</b> | <b>1783.9944</b> | <b>0.7303</b>  | <b>2</b> | <b>4</b>  | <b>64</b>    | <b>1</b> | <b>K.VNGLIAAVKGREPEFGK.E</b>                                                    |
| <a href="#">7749</a>  | 895.0496        | 1788.0847        | 1785.9454        | 2.1393         | 0        | 12        | 8.8          | 1        | R.VFVGYPFLQEAYVVR.V <a href="#">7746</a>                                        |
| <a href="#">8447</a>  | 930.7326        | 1859.4507        | 1859.8842        | -0.4335        | 1        | 2         | 80           | 2        | R.FFEAEYSGERWIQAK.K                                                             |
| <a href="#">8464</a>  | 621.6845        | 1862.0317        | 1863.8871        | -1.8553        | 2        | 1         | 1e+02        | 10       | R.GAVAGMNGRNGFSQRGR.G                                                           |
| <a href="#">9130</a>  | 646.2875        | 1935.8407        | 1933.1071        | 2.7337         | 0        | 1         | 1.2e+02      | 5        | R.LGTIIGPVEAMVHVQLLK.G                                                          |
| <a href="#">9219</a>  | 650.5142        | 1948.5207        | 1946.1175        | 2.4032         | 2        | 4         | 54           | 4        | K.IKPKKLF <del>F</del> MAIDGVAPR.A                                              |
| <a href="#">10314</a> | 691.6772        | 2072.0097        | 2073.2132        | -1.2035        | 1        | 5         | 45           | 3        | R.RLGTIIGPVEAMVHVQLLK.G                                                         |
| <a href="#">10487</a> | 699.6505        | 2095.9297        | 2096.1014        | -0.1717        | 2        | 3         | 60           | 8        | K.EHLLTPEEKARNGFGASLK.F                                                         |
| <a href="#">10565</a> | 703.2715        | 2106.7927        | 2104.1065        | 2.6862         | 2        | 1         | 97           | 7        | K.AADPQPLDFPPTLPARDRK.F                                                         |
| <a href="#">11927</a> | 767.4425        | 2299.3057        | 2297.1685        | 2.1372         | 1        | 1         | 93           | 9        | K.LIEQDADQLIQNPAMQAKK.V                                                         |

|                       |                  |                  |                  |                |          |          |           |          |                                                                                      |
|-----------------------|------------------|------------------|------------------|----------------|----------|----------|-----------|----------|--------------------------------------------------------------------------------------|
| <a href="#">12079</a> | 773.3412         | 2317.0017        | 2318.0426        | -1.0409        | 2        | 2        | 83        | 5        | K.YYTGKFEWGLDNHEEMRK.L                                                               |
| <a href="#">12121</a> | 775.4349         | 2323.2827        | 2322.1348        | 1.1480         | 1        | 4        | 49        | 3        | K.EILPKMGGYINEQGVINMER.L <a href="#">12120</a>                                       |
| <a href="#">12998</a> | <b>819.7819</b>  | <b>2456.3237</b> | <b>2454.2664</b> | <b>2.0573</b>  | <b>1</b> | <b>3</b> | <b>61</b> | <b>3</b> | <b>K.KPKELEHQNFYLLHLCMVR.E</b>                                                       |
| <a href="#">13005</a> | 820.6559         | 2458.9457        | 2459.3053        | -0.3596        | 2        | 3        | 59        | 3        | R.NESMVITVLDPGSRSSSLLAKQK.L                                                          |
| <a href="#">13473</a> | <b>839.8552</b>  | <b>2516.5437</b> | <b>2514.2841</b> | <b>2.2596</b>  | <b>2</b> | <b>2</b> | <b>80</b> | <b>3</b> | <b>K.FFRWLSERYPAISMLIAENR.I</b>                                                      |
| <a href="#">13988</a> | 869.3905         | 2605.1497        | 2607.0878        | -1.9381        | 1        | 2        | 75        | 3        | K.LPAKQNDDSDDEEDEEASMAVQR.I <a href="#">13990</a>                                    |
| <a href="#">15432</a> | <b>996.8355</b>  | <b>2987.4847</b> | <b>2984.5047</b> | <b>2.9800</b>  | <b>2</b> | <b>6</b> | <b>22</b> | <b>1</b> | <b>R.GIASWPWFFQYHYAPMISDVKKGLK.A</b>                                                 |
| <a href="#">15435</a> | <b>997.3699</b>  | <b>2989.0877</b> | <b>2989.3570</b> | <b>-0.2693</b> | <b>2</b> | <b>6</b> | <b>28</b> | <b>1</b> | <b>K.LPAKQNDDSDDEEDEEASMAVQRIIR.K</b>                                                |
| <a href="#">15895</a> | <b>1068.4415</b> | <b>3202.3027</b> | <b>3203.6550</b> | <b>-1.3523</b> | <b>2</b> | <b>5</b> | <b>29</b> | <b>1</b> | <b>K.KGLKADTNFQLGQPFPRPYDQLMGVLPDR.S</b> <a href="#">15892</a> <a href="#">15896</a> |

456. [gi|220690781|gb|EED47130.1|](#) Mass: 50181 Score: 35 Queries matched: 16 emPAI: 0.07

tubulin beta subunit [Aspergillus flavus NRRL3357]

| Query                 | Observed        | Mr(expt)         | Mr(calc)         | Delta         | Miss     | Score     | Expect       | Rank     | Peptide                                                                                                                                                                |
|-----------------------|-----------------|------------------|------------------|---------------|----------|-----------|--------------|----------|------------------------------------------------------------------------------------------------------------------------------------------------------------------------|
| <a href="#">2501</a>  | 642.1186        | 1282.2227        | 1281.6097        | 0.6130        | 0        | 5         | 43           | 2        | R.MMATFSVAPSPK.V                                                                                                                                                       |
| <a href="#">3286</a>  | 456.4409        | 1366.3007        | 1364.5714        | 1.7294        | 0        | 8         | 22           | 5        | R.NMMAANFHNGR.F                                                                                                                                                        |
| <a href="#">5292</a>  | 793.6841        | 1585.3537        | 1584.8181        | 0.5356        | 0        | 12        | 10           | 2        | R.AVLVDLEPGTMDAVR.A <a href="#">5308</a> <a href="#">5312</a>                                                                                                          |
| <a href="#">5478</a>  | 801.6526        | 1601.2907        | 1600.8131        | 0.4777        | 0        | (11)      | 12           | 3        | R.AVLVDLEPGTMDAVR.A <a href="#">5454</a> <a href="#">5463</a> <a href="#">5470</a> <a href="#">5477</a> <a href="#">5483</a> <a href="#">5490</a> <a href="#">5497</a> |
| <a href="#">13862</a> | <b>858.7655</b> | <b>2573.2747</b> | <b>2572.3319</b> | <b>0.9428</b> | <b>0</b> | <b>38</b> | <b>0.018</b> | <b>1</b> | <b>K.LASPSYGDLNHLVSAVMSGVTVSLR.F</b> <a href="#">13857</a>                                                                                                             |
| <a href="#">16147</a> | 1110.7329       | 3329.1767        | 3326.5218        | 2.6550        | 0        | 2         | 63           | 4        | R.EAESCDCLQGFQITHSLGGGTGSGMGTLLISK.I                                                                                                                                   |

457. [gi|220694223|gb|EED50567.1|](#) Mass: 38399 Score: 35 Queries matched: 16 emPAI: 0.09

KH domain RNA-binding protein [Aspergillus flavus NRRL3357]

| Query                 | Observed         | Mr(expt)         | Mr(calc)         | Delta          | Miss     | Score     | Expect       | Rank      | Peptide                                                         |
|-----------------------|------------------|------------------|------------------|----------------|----------|-----------|--------------|-----------|-----------------------------------------------------------------|
| <a href="#">1308</a>  | 1090.3540        | 1089.3467        | 1089.5666        | -0.2199        | 1        | 3         | 1e+02        | 9         | R.DETGVKAGVSK.V                                                 |
| <a href="#">1441</a>  | 558.1746         | 1114.3347        | 1113.5891        | 0.7457         | 2        | 8         | 27           | 7         | K.TRRSQLPQE.-                                                   |
| <a href="#">2303</a>  | 631.6381         | 1261.2617        | 1260.6826        | 0.5791         | 0        | 6         | 46           | 8         | R.GTGTILYNPAVR.A                                                |
| <a href="#">2765</a>  | <b>657.2466</b>  | <b>1312.4787</b> | <b>1311.7511</b> | <b>0.7277</b>  | <b>0</b> | <b>35</b> | <b>0.057</b> | <b>1</b>  | <b>R.VLTVTGPLQGTAR.A</b> <a href="#">2759</a>                   |
| <a href="#">2789</a>  | <b>658.6941</b>  | <b>1315.3737</b> | <b>1315.6732</b> | <b>-0.2995</b> | <b>1</b> | <b>7</b>  | <b>34</b>    | <b>10</b> | <b>K.NVADLRDETGVK.A</b> <a href="#">2795</a>                    |
| <a href="#">2851</a>  | 661.8026         | 1321.5907        | 1319.7310        | 1.8597         | 1        | 1         | 1.1e+02      | 10        | K.AGVSKVVPGVHDR.V                                               |
| <a href="#">4801</a>  | 770.3821         | 1538.7497        | 1538.7987        | -0.0490        | 1        | 8         | 22           | 2         | K.HIQDASGVRMVAQK.E                                              |
| <a href="#">5299</a>  | 529.5762         | 1585.7067        | 1585.7294        | -0.0226        | 0        | 6         | 38           | 10        | K.TEEEYAQSMLTLR.A                                               |
| <a href="#">6556</a>  | <b>561.5859</b>  | <b>1681.7357</b> | <b>1678.8018</b> | <b>2.9339</b>  | <b>1</b> | <b>7</b>  | <b>28</b>    | <b>7</b>  | <b>R.MVAQKEMLPQSTER.I</b>                                       |
| <a href="#">13233</a> | <b>829.2805</b>  | <b>2484.8197</b> | <b>2485.2370</b> | <b>-0.4173</b> | <b>1</b> | <b>6</b>  | <b>35</b>    | <b>5</b>  | <b>K.EMLPQSTERIVEVQGTPEGIEK.A</b> <a href="#">13235</a>         |
| <a href="#">15972</a> | 1083.8202        | 3248.4387        | 3249.6049        | -1.1662        | 2        | 4         | 39           | 8         | R.MFTIMGSAQANEKALYLLYENLEAEKTR.R                                |
| <a href="#">16082</a> | <b>1098.7679</b> | <b>3293.2817</b> | <b>3290.5799</b> | <b>2.7018</b>  | <b>0</b> | <b>3</b>  | <b>51</b>    | <b>2</b>  | <b>R.GYPLVTEDEGEEIQTNISIPADMVGCIIGR.A</b> <a href="#">16079</a> |

458. [gi|220698074|gb|EED54414.1|](#) Mass: 11906 Score: 34 Queries matched: 5 emPAI: 0.29

NADH-ubiquinone oxidoreductase 12 kda subunit, putative [Aspergillus flavus NRRL3357]

| Query | Observed | Mr(expt) | Mr(calc) | Delta | Miss | Score | Expect | Rank | Peptide |
|-------|----------|----------|----------|-------|------|-------|--------|------|---------|
|-------|----------|----------|----------|-------|------|-------|--------|------|---------|

|                      |                 |                  |                  |               |          |          |           |          |                              |
|----------------------|-----------------|------------------|------------------|---------------|----------|----------|-----------|----------|------------------------------|
| <a href="#">17</a>   | 643.3960        | 642.3887         | 642.2465         | 0.1422        | 0        | 12       | 10        | 1        | R.SMMSR.L <a href="#">18</a> |
| <a href="#">1556</a> | 566.6856        | 1131.3567        | 1130.5972        | 0.7596        | 0        | 34       | 0.07      | 1        | M.PTPESAAFLAK.K              |
| <a href="#">2531</a> | <b>643.7626</b> | <b>1285.5107</b> | <b>1284.6938</b> | <b>0.8169</b> | <b>1</b> | <b>5</b> | <b>46</b> | <b>6</b> | <b>R.DAIIREQWVR.S</b>        |
| <a href="#">7196</a> | 871.0721        | 1740.1297        | 1738.8784        | 1.2513        | 2        | 5        | 44        | 4        | R.EGVNHLEKCGALREK.Y          |

Mascot: <http://www.matrixscience.com/>
